# Supplementary material for: Dynamic shifts in occupancy by TAL1 are guided by GATA factors and drive large-scale reprogramming of gene expression during hematopoiesis
Source: Genome Res. 2014 Dec;24(12):1945–62. doi: 10.1101/gr.164830.113 (PMC4248312; doi:10.1101/gr.164830.113)
Supplement: Supplemental Material [file supp_gr.164830.113_Supplemental_Table1.xlsx]

## Sheet: selectedgreatfunctionterms_sign
		Cell type distribution for TAL1 occupancy
	HPC	+	-	-	-	-	-	+	+	-	+		-
	Epro	-	+	-	-	-	-	+	-	+	+		-
	G1E	-	-	+	-	-	-	-	-	+	+		-
	ER4	-	-	-	+	-	-	-	-	+	+		-
	Ebl	-	-	-	-	+	-	-	-	+	+		-
	MEG	-	-	-	-	-	+	-	+	-	+	MISC	-
Category	Term	BinomFdrQ												Genes
BioCyc Pathway	aerobic respiration -- electron donor II	5.23681e-169												Cox5a,Cox7c,Ndufa10,Ndufa13,Ndufa2,Ndufa4l2,Ndufa6,Ndufa7,Ndufa9,Ndufaf1,Ndufaf3,Ndufb11,Ndufb2,Ndufb3,Ndufb5,Ndufb6,Ndufb7,Ndufb8,Ndufb9,Ndufc1,Ndufs1,Ndufs2,Ndufs3,Ndufs7,Sdha,Sdhc,Sdhd,Uqcr10,Uqcrb,Uqcrh,Uqcrq	NA	NA	NA	NA	NA	NA	NA	NA	NA	NA	NA
GO Biological Process	antigen processing and presentation	0												Ap3d1,B2m,Calr,Cd74,Fcer1g,Fcgr1,Fcgr2b,Fcgr3,Fcgrt,Gm11127,Gm6034,H2-Aa,H2-Ab1,H2-Bl,H2-D1,H2-DMb2,H2-Ea-ps,H2-Eb1,H2-Eb2,H2-Gs10,H2-K1,H2-M10.2,H2-M10.5,H2-M10.6,H2-M5,H2-Ob,H2-Q1,H2-Q10,H2-Q2,H2-Q8,H2-Q9,H2-T22,H2-T23,H2-T24,H2-T3,H2-t9,Hfe,Icam1,Mr1,Psmb8,Psmb9,Raet1d,Relb,Slc11a1,Tap1,Tap2,Tapbp	NA	NA	NA	NA	NA	NA	NA	NA	NA	NA	NA
GO Biological Process	antigen processing and presentation of peptide antigen	0	9.20904e-169											B2m,Calr,Cd74,Fcer1g,Fcgr1,Fcgr2b,Fcgr3,H2-Aa,H2-Ab1,H2-D1,H2-DMb2,H2-Eb1,H2-Gs10,H2-K1,H2-Q1,H2-Q10,H2-Q2,H2-Q9,H2-T23,H2-T3,Hfe,Mr1,Slc11a1,Tap1,Tap2,Tapbp	Fcgr1,H2-D1,H2-Gs10,H2-Q1,H2-Q10,H2-Q2,H2-Q9,Hfe,Slc11a1	NA	NA	NA	NA	NA	NA	NA	NA	NA	NA
GO Biological Process	biosynthetic process	0		0								0		0610031J06Rik,1110034A24Rik,1600027N09Rik,2010111I01Rik,2410022L05Rik,2810006K23Rik,2810422J05Rik,6030422M02Rik,A230051G13Rik,A630055G03Rik,Aars,Aars2,Abcb6,Abcf1,Abt1,Acadm,Acan,Acbd3,Accs,Accsl,Acer3,Acly,Actl6a,Ada,Adc,Adcy10,Adcy2,Adssl1,Aes,Aff1,Aff3,Agmat,Agpat2,Agpat4,Agpat5,Agpat9,Agps,Aimp2,Ak3,Akna,Akt1,Alas1,Aldh1a1,Aldh1l2,Aldh9a1,Alg1,Alox12e,Alx4,Amd2,Ang,Apip,Apoa1,Apoa2,Apoe,Aprt,…	NA	2210012G02Rik,2810006K23Rik,A3galt2,Abca1,Abcb6,Abhd5,Acadm,Acbd3,Acer3,Acss1,Acss2,Actr5,Ada,Adc,Adcy4,Aff1,Aff3,Agl,Agpat2,Agpat4,Aimp1,Alas2,Aldh18a1,Aldh1l1,Aldh4a1,Alg6,Alox5,Alx3,Alx4,Angpt1,Anp32a,Aprt,Arid3a,Arid4b,Arid5a,Arntl,Arx,Asns,Asnsd1,Asxl1,Atg10,Atoh8,Atp1b2,Atp2b1,Atp2b2,Atp2b3,Atp4b,Atp5d,Atp5f1,Atp5g1,Atp7a,B3galt4,B3gnt2,B3gnt4,B4galnt2,B4galt1,BC016495,Bach1,Bbox1,Bcl11a,Bm…	NA	NA	NA	NA	NA	NA	NA	0610031J06Rik,2210018M11Rik,2810006K23Rik,2810405K02Rik,2810422J05Rik,A230051G13Rik,A630055G03Rik,Abca1,Abcb6,Abcf1,Abhd5,Abtb1,Acaca,Acacb,Acss1,Acss2,Actl6a,Actl6b,Actr5,Ada,Adc,Adcy10,Adcy4,Adcy6,Adcy9,Adssl1,Aes,Aff1,Aff3,Agmat,Agpat2,Agpat3,Agpat4,Agpat5,Aimp2,Akna,Akt1,Alad,Alas2,Aldh1l1,Aldh4a1,Aldh9a1,Alox5,Angpt1,Anp32a,Apoa1,Apoe,Aprt,Aqp1,Ar,Arid4b,Arid5a,Arntl,Arrb1,Arx,Aspdh,Atad2,At…	NA
GO Biological Process	cell activation	0							2.5582e-131					Ada,Adam10,Adam17,Adam9,Agt,Apc,Atp7a,Axl,B2m,Bak1,Bax,Bcl10,Bcl11a,Bcl3,Bloc1s3,Ccl5,Ccr7,Cd24a,Cd28,Cd300a,Cd3d,Cd3e,Cd48,Cd74,Cd79a,Chrna4,Clcf1,Cntf,Cplx2,Crip3,Ctnnb1,Cx3cr1,Cxcr2,Cxcr4,Ddost,Dock2,Egr1,Ercc1,Exosc3,Exosc6,F2r,Fcer1g,Fcgr3,Fkbp1a,Fkbp1b,Flt3,Fut7,Fzd2,Gimap1,Gimap5,Gm885,Gna13,H2-Ab1,Hdac5,Hhex,Hsh2d,Hspd1,Icam1,Ifnar1,Ifnz,Ikzf1,Il17ra,Il6,Impdh1,Impdh2,Irf1,Itgam,Itgav,Itp…	NA	NA	NA	NA	NA	NA	Adora2a,Agt,Bcl11a,Ccl5,Cd276,Cd48,Ddost,F2r,Flt3,Gimap1,Gimap5,Hsh2d,Ikzf1,Itpkb,Klre1,Lyn,Msh6,Myh9,Ndrg1,P2ry12,Pik3r1,Plcg2,Rab27a,Slamf1,Sp3,Tlr7,Tnf,Zfp36l1,Zfp36l2	NA	NA	NA	NA
GO Biological Process	cellular biosynthetic process	0		0								0		0610031J06Rik,1110034A24Rik,1600027N09Rik,2010111I01Rik,2410022L05Rik,2810006K23Rik,2810422J05Rik,6030422M02Rik,A230051G13Rik,A630055G03Rik,Aars,Aars2,Abcb6,Abcf1,Abt1,Acadm,Acan,Accs,Accsl,Acer3,Acly,Actl6a,Ada,Adc,Adcy10,Adcy2,Adssl1,Aes,Aff1,Aff3,Agmat,Agpat2,Agpat4,Agpat5,Agpat9,Aimp2,Ak3,Akna,Akt1,Alas1,Aldh1a1,Aldh9a1,Alox12e,Alx4,Amd2,Ang,Apip,Apoa1,Apoa2,Apoe,Aprt,Arid1a,Arid3a,Arid5a,Arr…	NA	2210012G02Rik,2810006K23Rik,A3galt2,Abca1,Abcb6,Abhd5,Acadm,Acer3,Acss1,Acss2,Actr5,Ada,Adc,Adcy4,Aff1,Aff3,Agl,Agpat2,Agpat4,Aimp1,Alas2,Aldh18a1,Aldh4a1,Alg6,Alox5,Alx3,Alx4,Angpt1,Anp32a,Aprt,Arid3a,Arid4b,Arid5a,Arntl,Arx,Asns,Asnsd1,Asxl1,Atg10,Atoh8,Atp1b2,Atp2b1,Atp2b2,Atp2b3,Atp4b,Atp5d,Atp5f1,Atp5g1,Atp7a,B3galt4,B3gnt2,B3gnt4,B4galnt2,B4galt1,BC016495,Bach1,Bbox1,Bcl11a,Bmpr2,Brd8,Brf2,…	NA	NA	NA	NA	NA	NA	NA	0610031J06Rik,2210018M11Rik,2810006K23Rik,2810405K02Rik,2810422J05Rik,A230051G13Rik,A630055G03Rik,Abca1,Abcb6,Abcf1,Abhd5,Abtb1,Acaca,Acacb,Acss1,Acss2,Actl6a,Actl6b,Actr5,Ada,Adc,Adcy10,Adcy4,Adcy6,Adcy9,Adssl1,Aes,Aff1,Aff3,Agmat,Agpat2,Agpat3,Agpat4,Agpat5,Aimp2,Akna,Akt1,Alad,Alas2,Aldh4a1,Aldh9a1,Alox5,Angpt1,Anp32a,Apoa1,Apoe,Aprt,Aqp1,Ar,Arid4b,Arid5a,Arntl,Arrb1,Arx,Aspdh,Atad2,Atf3,Atf7i…	NA
GO Biological Process	cellular component assembly	0	0	0			0	0		0		0		0610037P05Rik,1110034A24Rik,2410091C18Rik,4930579C15Rik,Acadl,Acadm,Acd,Acot13,Actg1,Actn4,Adipoq,Agfg1,Aif1,Aldh1a1,Ang,Angptl4,Apc,Apoa1,Apoa2,Apoa4,Apoe,Apom,Aqp11,Arhgap10,Atg9a,Atl2,Atp7a,Aurkb,B9d2,Baiap2,Bat1a,Bax,Bbs1,Bbs10,Bcl10,Becn1,Bin3,C2cd3,Cacna1a,Calr,Ccdc88a,Ccdc88c,Ccl5,Ccr7,Cd3d,Cd74,Cdk1,Cep63,Chaf1a,Chaf1b,Chn2,Cirbp,Clp1,Cntnap1,Col17a1,Col23a1,Coro1c,Cox10,Cox15,Cox18,Cpb1,…	0610037P05Rik,Acta1,Add2,Aif1,Asap1,Baiap2l2,Bat1a,Cacna1a,Cby1,Ccdc40,Cenpv,Cirbp,Espn,Fgd3,Gas7,Gnpat,H2afx,Haus8,Hist1h1a,Hist1h1b,Hist1h1c,Hist1h1d,Hist1h1e,Hist1h1t,Hist1h2ab,Hist1h2ac,Hist1h2ae,Hist1h2af,Hist1h2ag,Hist1h2ah,Hist1h2ai,Hist1h2ak,Hist1h2an,Hist1h2ap,Hist1h2bb,Hist1h2bc,Hist1h2be,Hist1h2bf,Hist1h2bg,Hist1h2bh,Hist1h2bj,Hist1h2bk,Hist1h2bl,Hist1h2bm,Hist1h2bn,Hist1h2bp,Hist1h3a,…	0610037P05Rik,1700012L04Rik,1700054O13Rik,Abca1,Acadm,Acd,Actg1,Add2,Agfg1,Angpt1,Anxa5,Aqp11,Arhgap10,Arhgap6,Arl2,Arl6,Asap1,Atg12,Atg14,Atg4b,Atg5,Atg9a,Atp7a,B9d2,Bbs10,Bbs4,Bcl10,Becn1,Bicd1,Capzb,Ccdc40,Ccdc88a,Ccnb1,Ccr7,Cdh2,Cenpv,Chaf1a,Chaf1b,Cirbp,Cntnap1,Cog4,Cpb1,Cpt1a,Crtc1,Crtc3,Ctcf,Ctnnb1,Ctsd,Cubn,Cuta,Diap1,Diap2,Eif2a,Eif2ak3,Enah,Eps15,Eral1,Espn,Fbln5,Fech,Fga,Fgb,Fgg,Gfpt1,…	NA	NA	Acacb,Acat1,Acta1,Actc1,Add2,Ang,Angpt1,Apom,App,Arhgap26,Arhgap42,Arrb1,Atg4b,Atpaf2,Bahd1,Cav2,Ccdc109a,Ccnb1,Cd3d,Cd9,Cdk1,Celf4,Cenpv,Chek2,Clec2i,Coro1c,Cubn,Cyba,Dctpp1,Dicer1,Dnaic2,Ehd4,Enah,Fermt3,Fkbp4,Gch1,Gja1,Gnpat,Gpx3,Grb2,Grb7,Gtf2a2,H2afb1,H3f3a,Hip1,Hist1h1a,Hist1h1b,Hist1h1c,Hist1h1d,Hist1h1e,Hist1h1t,Hist1h2ab,Hist1h2ac,Hist1h2ae,Hist1h2af,Hist1h2ag,Hist1h2ah,Hist1h2ai,Hist1h2…	Acot13,Acvrl1,Cacna1a,Cat,Cenpv,Cirbp,Espn,H2afx,H3f3a,H3f3b,Hist1h1a,Hist1h1b,Hist1h1c,Hist1h1d,Hist1h1e,Hist1h1t,Hist1h2ab,Hist1h2ac,Hist1h2ae,Hist1h2af,Hist1h2ag,Hist1h2ah,Hist1h2ai,Hist1h2ak,Hist1h2an,Hist1h2ap,Hist1h2bb,Hist1h2bc,Hist1h2be,Hist1h2bf,Hist1h2bg,Hist1h2bh,Hist1h2bj,Hist1h2bk,Hist1h2bl,Hist1h2bm,Hist1h2bn,Hist1h2bp,Hist1h3a,Hist1h3b,Hist1h3c,Hist1h3d,Hist1h3e,Hist1h3f,Hist1h3g,H…	NA	1700012L04Rik,Add2,Agfg1,Ang,Apom,Arl2,Atg14,Atg9a,Bahd1,Bcl10,Ccnb1,Clp1,Crtc3,Ehd1,Eif3d,Eral1,Fech,Gch1,Gchfr,Haus1,Hdac6,Hes5,Hist1h1a,Hist1h1c,Hist1h1d,Hist1h1e,Hist1h1t,Hist1h2ab,Hist1h2ac,Hist1h2ae,Hist1h2af,Hist1h2bb,Hist1h2bc,Hist1h2be,Hist1h2bf,Hist1h2bg,Hist1h2bh,Hist1h3a,Hist1h3b,Hist1h3c,Hist1h3d,Hist1h3e,Hist1h3f,Hist1h3g,Hist1h4a,Hist1h4b,Hist1h4c,Hist1h4d,Hist1h4f,Hist1h4h,Hr,Igf1…	NA	0610037P05Rik,1700012L04Rik,Abca1,Acaca,Acacb,Acd,Acta1,Actg1,Actn4,Add2,Agfg1,Alad,Aldob,Amfr,Angpt1,Angptl4,Apoa1,Apoa4,Apoe,Aqp11,Arhgap10,Arhgap6,Arrb1,Asap1,Atg14,Atg4b,Atg9a,Atp7a,Aurkb,B9d2,Bahd1,Bax,Bbs1,Bbs2,Bcl10,Becn1,Bid,Blm,Cacna1a,Calr,Capzb,Cby1,Ccdc40,Ccdc88c,Ccnb1,Ccr7,Cd9,Cenpv,Chaf1b,Chek2,Chrna3,Clec2i,Clp1,Cntnap1,Coro1c,Cpb1,Cpsf7,Cpt1a,Crnkl1,Crtc1,Crtc3,Ctcf,Ctnna1,Ctsd,Cu…	NA
GO Biological Process	cellular component assembly at cellular level	0	0	0			0	0		0		0		0610037P05Rik,1110034A24Rik,2410091C18Rik,4930579C15Rik,Acd,Actg1,Actn4,Agfg1,Aif1,Ang,Arhgap10,Atg9a,Atp7a,Aurkb,B9d2,Baiap2,Bat1a,Bbs1,Bbs10,Becn1,Bin3,C2cd3,Cacna1a,Calr,Ccdc88a,Ccl5,Ccr7,Cep63,Chaf1a,Chaf1b,Chn2,Cirbp,Clp1,Cntnap1,Col17a1,Coro1c,Cox10,Cox15,Cox18,Cpb1,Crnkl1,Cryaa,Ctcf,Ctnnb1,Cul3,Diap1,Diap2,Dnaic2,Eif2a,Eif3a,Eif3d,Elp2,Eral1,Espn,Ezr,Fkbp4,Gas7,Gnpat,Gtf2a2,H1fx,H2-Ke2,H2a…	0610037P05Rik,Acta1,Add2,Aif1,Asap1,Baiap2l2,Bat1a,Cacna1a,Cby1,Ccdc40,Cenpv,Cirbp,Espn,Fgd3,Gas7,Gnpat,H2afx,Haus8,Hist1h1a,Hist1h1b,Hist1h1c,Hist1h1d,Hist1h1e,Hist1h1t,Hist1h2ab,Hist1h2ac,Hist1h2ae,Hist1h2af,Hist1h2ag,Hist1h2ah,Hist1h2ai,Hist1h2ak,Hist1h2an,Hist1h2ap,Hist1h2bb,Hist1h2bc,Hist1h2be,Hist1h2bf,Hist1h2bg,Hist1h2bh,Hist1h2bj,Hist1h2bk,Hist1h2bl,Hist1h2bm,Hist1h2bn,Hist1h2bp,Hist1h3a,…	0610037P05Rik,1700012L04Rik,1700054O13Rik,Acd,Actg1,Add2,Agfg1,Angpt1,Arhgap10,Arhgap6,Arl2,Arl6,Asap1,Atg12,Atg14,Atg4b,Atg5,Atg9a,Atp7a,B9d2,Bbs10,Bbs4,Becn1,Bicd1,Capzb,Ccdc40,Ccdc88a,Ccr7,Cdh2,Cenpv,Chaf1a,Chaf1b,Cirbp,Cntnap1,Cog4,Cpb1,Ctcf,Ctnnb1,Ctsd,Diap1,Diap2,Eif2a,Eps15,Eral1,Espn,Fbln5,Fga,Fgb,Fgg,Gm5132,Gtf2a2,H2-Ke2,H3f3a,Haus4,Haus8,Hdac3,Hdac6,Hist1h1a,Hist1h1b,Hist1h1c,Hist1h1d,H…	NA	NA	Acta1,Actc1,Add2,Ang,Angpt1,App,Arhgap26,Arhgap42,Arrb1,Atg4b,Atpaf2,Bahd1,Cav2,Cd9,Celf4,Cenpv,Chek2,Clec2i,Coro1c,Cyba,Dicer1,Dnaic2,Fkbp4,Gnpat,Grb7,Gtf2a2,H2afb1,H3f3a,Hip1,Hist1h1a,Hist1h1b,Hist1h1c,Hist1h1d,Hist1h1e,Hist1h1t,Hist1h2ab,Hist1h2ac,Hist1h2ae,Hist1h2af,Hist1h2ag,Hist1h2ah,Hist1h2ai,Hist1h2ak,Hist1h2an,Hist1h2ap,Hist1h2bb,Hist1h2bc,Hist1h2be,Hist1h2bf,Hist1h2bg,Hist1h2bh,Hist1h2b…	Cacna1a,Cenpv,Cirbp,Espn,H2afx,H3f3a,H3f3b,Hist1h1a,Hist1h1b,Hist1h1c,Hist1h1d,Hist1h1e,Hist1h1t,Hist1h2ab,Hist1h2ac,Hist1h2ae,Hist1h2af,Hist1h2ag,Hist1h2ah,Hist1h2ai,Hist1h2ak,Hist1h2an,Hist1h2ap,Hist1h2bb,Hist1h2bc,Hist1h2be,Hist1h2bf,Hist1h2bg,Hist1h2bh,Hist1h2bj,Hist1h2bk,Hist1h2bl,Hist1h2bm,Hist1h2bn,Hist1h2bp,Hist1h3a,Hist1h3b,Hist1h3c,Hist1h3d,Hist1h3e,Hist1h3f,Hist1h3g,Hist1h3h,Hist1h3i,H…	NA	1700012L04Rik,Add2,Agfg1,Ang,Arl2,Atg14,Atg9a,Bahd1,Clp1,Eif3d,Eral1,Haus1,Hdac6,Hist1h1a,Hist1h1c,Hist1h1d,Hist1h1e,Hist1h1t,Hist1h2ab,Hist1h2ac,Hist1h2ae,Hist1h2af,Hist1h2bb,Hist1h2bc,Hist1h2be,Hist1h2bf,Hist1h2bg,Hist1h2bh,Hist1h3a,Hist1h3b,Hist1h3c,Hist1h3d,Hist1h3e,Hist1h3f,Hist1h3g,Hist1h4a,Hist1h4b,Hist1h4c,Hist1h4d,Hist1h4f,Hist1h4h,Lama5,Lonp1,Mtss1,Ndufs5,Pdxp,Ppp1r9b,Prdx6,Psmd9,Rcc1,R…	NA	0610037P05Rik,1700012L04Rik,Acd,Acta1,Actg1,Actn4,Add2,Agfg1,Aldob,Angpt1,Arhgap10,Arhgap6,Arrb1,Asap1,Atg14,Atg4b,Atg9a,Atp7a,Aurkb,B9d2,Bahd1,Bbs1,Bbs2,Becn1,Cacna1a,Calr,Capzb,Cby1,Ccdc40,Ccr7,Cd9,Cenpv,Chaf1b,Chek2,Chrna3,Clec2i,Clp1,Cntnap1,Coro1c,Cpb1,Crnkl1,Ctcf,Ctnna1,Ctsd,Cyba,Diap1,Dicer1,E2f4,Eif3d,Eral1,Espn,Ezr,Fbf1,Foxj1,Fscn1,Fuz,Grb7,Gtf2a2,H2afx,H3f3a,Haus1,Haus4,Hdac6,Hist1h1a,H…	NA
GO Biological Process	cellular component biogenesis	0	0	0			0	0		0		0		0610037P05Rik,1110034A24Rik,2410091C18Rik,4930579C15Rik,Acadl,Acadm,Acd,Acot13,Actg1,Actn4,Adipoq,Agfg1,Aif1,Aldh1a1,Ang,Angptl4,Apc,Apoa1,Apoa2,Apoa4,Apoe,Apom,Aqp11,Arhgap10,Atg9a,Atl2,Atp7a,Aurkb,B9d2,Baiap2,Bat1a,Bax,Bbs1,Bbs10,Bcl10,Becn1,Bin3,Bms1,Bop1,Brix1,Bysl,C2cd3,Cacna1a,Calr,Ccdc88a,Ccdc88c,Ccl5,Ccr7,Cd3d,Cd74,Cdk1,Cdkn2a,Cep63,Chaf1a,Chaf1b,Chn2,Cirbp,Clp1,Cntnap1,Col17a1,Col23a1,Co…	0610037P05Rik,Acta1,Add2,Aif1,Asap1,Baiap2l2,Bat1a,Bop1,Cacna1a,Cby1,Ccdc40,Cenpv,Cirbp,Clip3,Dis3,Eif4a3,Espn,Fgd3,Gas7,Gnpat,Gtpbp4,H2afx,Haus8,Hist1h1a,Hist1h1b,Hist1h1c,Hist1h1d,Hist1h1e,Hist1h1t,Hist1h2ab,Hist1h2ac,Hist1h2ae,Hist1h2af,Hist1h2ag,Hist1h2ah,Hist1h2ai,Hist1h2ak,Hist1h2an,Hist1h2ap,Hist1h2bb,Hist1h2bc,Hist1h2be,Hist1h2bf,Hist1h2bg,Hist1h2bh,Hist1h2bj,Hist1h2bk,Hist1h2bl,Hist1h2bm…	0610037P05Rik,1700012L04Rik,1700054O13Rik,Abca1,Acadm,Acd,Actg1,Add2,Agfg1,Angpt1,Anxa5,Aqp11,Arhgap10,Arhgap6,Arl2,Arl6,Asap1,Atg12,Atg14,Atg4b,Atg5,Atg9a,Atp7a,B9d2,Bbs10,Bbs4,Bcl10,Becn1,Bicd1,Capzb,Ccdc40,Ccdc88a,Ccnb1,Ccr7,Cdh2,Cenpv,Chaf1a,Chaf1b,Cirbp,Cntnap1,Cog4,Cpb1,Cpt1a,Crtc1,Crtc3,Ctcf,Ctnnb1,Ctsd,Cubn,Cuta,Dcaf13,Diap1,Diap2,Dkc1,Drosha,Eif2a,Eif2ak3,Eif4a3,Emg1,Enah,Eps15,Eral1,Esp…	NA	NA	Aatf,Acacb,Acat1,Acta1,Actc1,Add2,Ang,Angpt1,Apom,App,Arhgap26,Arhgap42,Arrb1,Atg4b,Atpaf2,Bahd1,Cav2,Ccdc109a,Ccnb1,Cd3d,Cd9,Cdk1,Celf4,Cenpv,Chek2,Clec2i,Coro1c,Cubn,Cyba,Dctpp1,Dicer1,Dnaic2,Drosha,Ehd4,Emg1,Enah,Exosc1,Exosc8,Fcf1,Fermt3,Fkbp4,Ftsj2,Gch1,Gja1,Gnpat,Gpx3,Grb2,Grb7,Gtf2a2,H2afb1,H3f3a,Hip1,Hist1h1a,Hist1h1b,Hist1h1c,Hist1h1d,Hist1h1e,Hist1h1t,Hist1h2ab,Hist1h2ac,Hist1h2ae,Hist1…	Acot13,Acvrl1,Cacna1a,Cat,Cenpv,Cirbp,Espn,H2afx,H3f3a,H3f3b,Hist1h1a,Hist1h1b,Hist1h1c,Hist1h1d,Hist1h1e,Hist1h1t,Hist1h2ab,Hist1h2ac,Hist1h2ae,Hist1h2af,Hist1h2ag,Hist1h2ah,Hist1h2ai,Hist1h2ak,Hist1h2an,Hist1h2ap,Hist1h2bb,Hist1h2bc,Hist1h2be,Hist1h2bf,Hist1h2bg,Hist1h2bh,Hist1h2bj,Hist1h2bk,Hist1h2bl,Hist1h2bm,Hist1h2bn,Hist1h2bp,Hist1h3a,Hist1h3b,Hist1h3c,Hist1h3d,Hist1h3e,Hist1h3f,Hist1h3g,H…	NA	0610007P22Rik,1700012L04Rik,Add2,Agfg1,Ang,Apom,Arl2,Atg14,Atg9a,Bahd1,Bcl10,Ccnb1,Clp1,Crtc3,Dimt1,Ehd1,Eif3d,Eral1,Fech,Gch1,Gchfr,Haus1,Hdac6,Hes5,Hist1h1a,Hist1h1c,Hist1h1d,Hist1h1e,Hist1h1t,Hist1h2ab,Hist1h2ac,Hist1h2ae,Hist1h2af,Hist1h2bb,Hist1h2bc,Hist1h2be,Hist1h2bf,Hist1h2bg,Hist1h2bh,Hist1h3a,Hist1h3b,Hist1h3c,Hist1h3d,Hist1h3e,Hist1h3f,Hist1h3g,Hist1h4a,Hist1h4b,Hist1h4c,Hist1h4d,Hist1…	NA	0610037P05Rik,1700012L04Rik,Abca1,Acaca,Acacb,Acd,Acta1,Actg1,Actn4,Add2,Agfg1,Alad,Aldob,Amfr,Angpt1,Angptl4,Apoa1,Apoa4,Apoe,Aqp11,Arhgap10,Arhgap6,Arrb1,Asap1,Atg14,Atg4b,Atg9a,Atp7a,Aurkb,B9d2,Bahd1,Bax,Bbs1,Bbs2,Bcl10,Becn1,Bid,Blm,Bop1,Bysl,Cacna1a,Calr,Capzb,Cby1,Ccdc40,Ccdc88c,Ccnb1,Ccr7,Cd9,Cenpv,Chaf1b,Chek2,Chrna3,Clec2i,Clip3,Clp1,Cntnap1,Coro1c,Cpb1,Cpsf7,Cpt1a,Crnkl1,Crtc1,Crtc3,Ctc…	NA
GO Biological Process	cellular component organization	0	0	0				0				0		0610037P05Rik,1110034A24Rik,1500010J02Rik,1600027N09Rik,2300002M23Rik,2410022L05Rik,2410091C18Rik,2810006K23Rik,2900073G15Rik,4930579C15Rik,Ablim3,Acadl,Acadm,Acan,Acd,Acin1,Acot13,Acot8,Actg1,Actl6a,Actn4,Adam15,Adamts14,Adamts20,Adamtsl4,Adipoq,Adrb2,Agfg1,Agt,Aif1,Akap8,Akt1,Aldh1a1,Als2,Anapc10,Anapc11,Anapc13,Anapc4,Anapc5,Ang,Angptl4,Ank3,Anln,Antxr1,Ap2a2,Ap3d1,Apaf1,Apbb2,Apc,Apoa1,Apoa2,…	0610037P05Rik,2300002M23Rik,6720463M24Rik,Abca7,Abcg1,Acta1,Actl6a,Adam15,Add2,Agt,Aif1,Akt1,Ambn,Anapc11,Apaf1,Aqp1,Asap1,Atp8b3,Baiap2l2,Bat1a,Bbc3,Bcar1,Birc5,Bmp7,Cacna1a,Cbx4,Cbx7,Cby1,Ccdc40,Cd47,Cenpv,Chchd3,Chrna1,Cirbp,Cltc,Cnn2,Cntrob,Cog2,Col5a1,Ctcfl,Daam1,Ddit4,Epb4.1l1,Espn,Eya3,Fam83d,Fcgr1,Fgd3,Fzr1,Gaa,Gas7,Get4,Gnpat,Gp1ba,Gprin1,H2afx,Haus8,Hip1r,Hist1h1a,Hist1h1b,Hist1h1c,Hist…	0610037P05Rik,1700012L04Rik,1700021K19Rik,1700054O13Rik,2810006K23Rik,2810021B07Rik,4933400A11Rik,Aak1,Abca1,Abca4,Acadm,Acd,Acsl4,Actg1,Actr3b,Adamtsl4,Add1,Add2,Adrb2,Afg3l2,Agfg1,Agtpbp1,Aip,Ak7,Akap4,Als2,Amph,Anapc10,Anapc16,Angpt1,Ankfy1,Anln,Antxr1,Anxa5,Aqp11,Aqp2,Arhgap10,Arhgap6,Arhgef18,Arl2,Arl6,Arl8b,Arx,Asap1,Asxl1,Atg12,Atg14,Atg4b,Atg5,Atg9a,Atp2b2,Atp7a,Axl,B3gnt2,B4galt1,B9d2,Bb…	NA	NA	NA	2810021B07Rik,Abcg1,Acot13,Acvrl1,Adamtsl4,Banp,Bmp7,Cacna1a,Cat,Cd24a,Cenpv,Cirbp,Cltc,Csf1r,Ctcfl,Ddit4,Erbb3,Espn,Eya3,Ftcd,Gapvd1,Gata2,H2afx,H3f3a,H3f3b,Hist1h1a,Hist1h1b,Hist1h1c,Hist1h1d,Hist1h1e,Hist1h1t,Hist1h2ab,Hist1h2ac,Hist1h2ae,Hist1h2af,Hist1h2ag,Hist1h2ah,Hist1h2ai,Hist1h2ak,Hist1h2an,Hist1h2ap,Hist1h2bb,Hist1h2bc,Hist1h2be,Hist1h2bf,Hist1h2bg,Hist1h2bh,Hist1h2bj,Hist1h2bk,Hist1h2…	NA	NA	NA	0610037P05Rik,1500010J02Rik,1700012L04Rik,2210018M11Rik,2810006K23Rik,2900073G15Rik,4933400A11Rik,A930038C07Rik,Aak1,Abca1,Abca4,Abcg1,Acaca,Acacb,Acd,Acin1,Acsl4,Acta1,Actg1,Actl6a,Actl6b,Actn4,Actr3b,Adamtsl4,Add1,Add2,Adm,Adrb2,Afg3l2,Agfg1,Ahi1,Aip,Ak7,Akt1,Alad,Aldob,Als2,Amfr,Angpt1,Angptl4,Ankfy1,Antxr1,Ap1s3,Ap2a1,Ap2a2,Apoa1,Apoa4,Apoa5,Apoc1,Apoc3,Apoe,Aqp1,Aqp11,Arf6,Arhgap10,Arhgap17,…	NA
GO Biological Process	cellular component organization or biogenesis	0	0	0				0				0		0610037P05Rik,1110034A24Rik,1500010J02Rik,1600027N09Rik,2300002M23Rik,2410022L05Rik,2410091C18Rik,2810006K23Rik,2900073G15Rik,4930579C15Rik,Ablim3,Acadl,Acadm,Acan,Acd,Acin1,Acot13,Acot8,Actg1,Actl6a,Actn4,Adam15,Adamts14,Adamts20,Adamtsl4,Adipoq,Adrb2,Agfg1,Agt,Aif1,Akap8,Akt1,Aldh1a1,Als2,Anapc10,Anapc11,Anapc13,Anapc4,Anapc5,Ang,Angptl4,Ank3,Anln,Antxr1,Ap2a2,Ap3d1,Apaf1,Apbb2,Apc,Apoa1,Apoa2,…	0610037P05Rik,2300002M23Rik,6720463M24Rik,Abca7,Abcg1,Acta1,Actl6a,Adam15,Add2,Agt,Aif1,Akt1,Ambn,Anapc11,Apaf1,Aqp1,Asap1,Atp8b3,Baiap2l2,Bat1a,Bbc3,Bcar1,Birc5,Bmp7,Bop1,Cacna1a,Cbx4,Cbx7,Cby1,Ccdc40,Cd47,Cenpv,Chchd3,Chrna1,Cirbp,Clip3,Cltc,Cnn2,Cntrob,Cog2,Col5a1,Ctcfl,Daam1,Ddit4,Dis3,Eif4a3,Epb4.1l1,Espn,Eya3,Fam83d,Fcgr1,Fgd3,Fzr1,Gaa,Gas7,Get4,Gnpat,Gp1ba,Gprin1,Gtpbp4,H2afx,Haus8,Hip1r,H…	0610037P05Rik,1700012L04Rik,1700021K19Rik,1700054O13Rik,2810006K23Rik,2810021B07Rik,4933400A11Rik,Aak1,Abca1,Abca4,Acadm,Acd,Acsl4,Actg1,Actr3b,Adamtsl4,Add1,Add2,Adrb2,Afg3l2,Agfg1,Agtpbp1,Aip,Ak7,Akap4,Als2,Amph,Anapc10,Anapc16,Angpt1,Ankfy1,Anln,Antxr1,Anxa5,Aqp11,Aqp2,Arhgap10,Arhgap6,Arhgef18,Arl2,Arl6,Arl8b,Arx,Asap1,Asxl1,Atg12,Atg14,Atg4b,Atg5,Atg9a,Atp2b2,Atp7a,Axl,B3gnt2,B4galt1,B9d2,Bb…	NA	NA	NA	2810021B07Rik,Abcg1,Acot13,Acvrl1,Adamtsl4,Banp,Bmp7,Cacna1a,Cat,Cd24a,Cenpv,Cirbp,Cltc,Csf1r,Ctcfl,Ddit4,Erbb3,Espn,Eya3,Ftcd,Gapvd1,Gata2,H2afx,H3f3a,H3f3b,Hist1h1a,Hist1h1b,Hist1h1c,Hist1h1d,Hist1h1e,Hist1h1t,Hist1h2ab,Hist1h2ac,Hist1h2ae,Hist1h2af,Hist1h2ag,Hist1h2ah,Hist1h2ai,Hist1h2ak,Hist1h2an,Hist1h2ap,Hist1h2bb,Hist1h2bc,Hist1h2be,Hist1h2bf,Hist1h2bg,Hist1h2bh,Hist1h2bj,Hist1h2bk,Hist1h2…	NA	NA	NA	0610037P05Rik,1500010J02Rik,1700012L04Rik,2210018M11Rik,2810006K23Rik,2900073G15Rik,4933400A11Rik,A930038C07Rik,Aak1,Abca1,Abca4,Abcg1,Acaca,Acacb,Acd,Acin1,Acsl4,Acta1,Actg1,Actl6a,Actl6b,Actn4,Actr3b,Adamtsl4,Add1,Add2,Adm,Adrb2,Afg3l2,Agfg1,Ahi1,Aip,Ak7,Akt1,Alad,Aldob,Als2,Amfr,Angpt1,Angptl4,Ankfy1,Antxr1,Ap1s3,Ap2a1,Ap2a2,Apoa1,Apoa4,Apoa5,Apoc1,Apoc3,Apoe,Aqp1,Aqp11,Arf6,Arhgap10,Arhgap17,…	NA
GO Biological Process	cellular macromolecular complex assembly	0	0	0			0	0		2.85306e-217		0		1110034A24Rik,2410091C18Rik,Ang,Aurkb,Bat1a,Calr,Ccl5,Cirbp,Clp1,Cox10,Cox15,Cox18,Crnkl1,Cryaa,Diap1,Diap2,Eif2a,Eif3a,Eif3d,Elp2,Eral1,Fkbp4,Gas7,Gtf2a2,H1fx,H2-Ke2,H2afb1,H2afj,H2afx,H2afy,H3f3a,Hist1h1a,Hist1h1b,Hist1h1c,Hist1h1d,Hist1h1e,Hist1h1t,Hist1h2ab,Hist1h2ac,Hist1h2ae,Hist1h2af,Hist1h2ai,Hist1h2ak,Hist1h2an,Hist1h2ap,Hist1h2bb,Hist1h2bc,Hist1h2be,Hist1h2bf,Hist1h2bg,Hist1h2bh,Hist1h2…	Bat1a,Ccdc40,Cenpv,Cirbp,Gas7,H2afx,Hist1h1a,Hist1h1b,Hist1h1c,Hist1h1d,Hist1h1e,Hist1h1t,Hist1h2ab,Hist1h2ac,Hist1h2ae,Hist1h2af,Hist1h2ag,Hist1h2ah,Hist1h2ai,Hist1h2ak,Hist1h2an,Hist1h2ap,Hist1h2bb,Hist1h2bc,Hist1h2be,Hist1h2bf,Hist1h2bg,Hist1h2bh,Hist1h2bj,Hist1h2bk,Hist1h2bl,Hist1h2bm,Hist1h2bn,Hist1h2bp,Hist1h3a,Hist1h3b,Hist1h3c,Hist1h3d,Hist1h3e,Hist1h3f,Hist1h3g,Hist1h3h,Hist1h3i,Hist1h4a…	1700012L04Rik,1700054O13Rik,Angpt1,Arl6,Bicd1,Ccdc40,Cenpv,Cirbp,Cog4,Diap1,Diap2,Eif2a,Eps15,Eral1,Fga,Fgb,Fgg,Gm5132,Gtf2a2,H2-Ke2,H3f3a,Hist1h1a,Hist1h1b,Hist1h1c,Hist1h1d,Hist1h1e,Hist1h1t,Hist1h2ab,Hist1h2ac,Hist1h2ae,Hist1h2af,Hist1h2ai,Hist1h2ak,Hist1h2an,Hist1h2ap,Hist1h2bb,Hist1h2bc,Hist1h2be,Hist1h2bf,Hist1h2bg,Hist1h2bh,Hist1h2bl,Hist1h2bm,Hist1h2bn,Hist1h2bp,Hist1h3a,Hist1h3b,Hist1h3c…	NA	NA	Ang,Angpt1,Atpaf2,Celf4,Cenpv,Cyba,Dicer1,Fkbp4,Grb7,Gtf2a2,H2afb1,H3f3a,Hip1,Hist1h1a,Hist1h1b,Hist1h1c,Hist1h1d,Hist1h1e,Hist1h1t,Hist1h2ab,Hist1h2ac,Hist1h2ae,Hist1h2af,Hist1h2ag,Hist1h2ah,Hist1h2ai,Hist1h2ak,Hist1h2an,Hist1h2ap,Hist1h2bb,Hist1h2bc,Hist1h2be,Hist1h2bf,Hist1h2bg,Hist1h2bh,Hist1h2bj,Hist1h2bk,Hist1h2bl,Hist1h2bm,Hist1h2bn,Hist1h2bp,Hist1h3a,Hist1h3b,Hist1h3c,Hist1h3d,Hist1h3e,Hi…	Cenpv,Cirbp,H2afx,H3f3a,H3f3b,Hist1h1a,Hist1h1b,Hist1h1c,Hist1h1d,Hist1h1e,Hist1h1t,Hist1h2ab,Hist1h2ac,Hist1h2ae,Hist1h2af,Hist1h2ag,Hist1h2ah,Hist1h2ai,Hist1h2ak,Hist1h2an,Hist1h2ap,Hist1h2bb,Hist1h2bc,Hist1h2be,Hist1h2bf,Hist1h2bg,Hist1h2bh,Hist1h2bj,Hist1h2bk,Hist1h2bl,Hist1h2bm,Hist1h2bn,Hist1h2bp,Hist1h3a,Hist1h3b,Hist1h3c,Hist1h3d,Hist1h3e,Hist1h3f,Hist1h3g,Hist1h3h,Hist1h3i,Hist1h4a,Hist1…	NA	1700012L04Rik,Ang,Clp1,Eif3d,Eral1,Hist1h1a,Hist1h1c,Hist1h1d,Hist1h1e,Hist1h1t,Hist1h2ab,Hist1h2ac,Hist1h2ae,Hist1h2af,Hist1h2bb,Hist1h2bc,Hist1h2be,Hist1h2bf,Hist1h2bg,Hist1h2bh,Hist1h3a,Hist1h3b,Hist1h3c,Hist1h3d,Hist1h3e,Hist1h3f,Hist1h3g,Hist1h4a,Hist1h4b,Hist1h4c,Hist1h4d,Hist1h4f,Hist1h4h,Lonp1,Mtss1,Ndufs5,Psmd9,Rpsa,Tspyl3,Tuba4a,Tubb1,Tubb5,Tubb6,Wnt3a	NA	1700012L04Rik,Aldob,Angpt1,Aurkb,Calr,Ccdc40,Cenpv,Chrna3,Clp1,Crnkl1,Cyba,Diap1,Dicer1,Eif3d,Eral1,Grb7,Gtf2a2,H2afx,H3f3a,Hist1h1a,Hist1h1c,Hist1h1d,Hist1h1e,Hist1h1t,Hist1h2ab,Hist1h2ac,Hist1h2ae,Hist1h2af,Hist1h2bb,Hist1h2bc,Hist1h2be,Hist1h2bf,Hist1h2bg,Hist1h2bh,Hist1h3a,Hist1h3b,Hist1h3c,Hist1h3d,Hist1h3e,Hist1h3f,Hist1h3g,Hist1h4a,Hist1h4b,Hist1h4c,Hist1h4d,Hist1h4f,Hist1h4h,Hist2h2ab,His…	NA
GO Biological Process	cellular macromolecular complex subunit organization	0	0	0			0	0		1.73003e-224		0		1110034A24Rik,2410091C18Rik,2810006K23Rik,Ang,Aurkb,Bat1a,Calr,Ccl5,Cirbp,Clp1,Cox10,Cox15,Cox18,Crnkl1,Cryaa,Ctcf,Diap1,Diap2,Eif2a,Eif3a,Eif3d,Elp2,Enah,Eral1,Etf1,Fkbp4,Fshr,Gas7,Ghrl,Gtf2a2,H1fx,H2-Ke2,H2afb1,H2afj,H2afx,H2afy,H3f3a,Hist1h1a,Hist1h1b,Hist1h1c,Hist1h1d,Hist1h1e,Hist1h1t,Hist1h2ab,Hist1h2ac,Hist1h2ae,Hist1h2af,Hist1h2ai,Hist1h2ak,Hist1h2an,Hist1h2ap,Hist1h2bb,Hist1h2bc,Hist1h2b…	Bat1a,Ccdc40,Cenpv,Cirbp,Gas7,H2afx,Hist1h1a,Hist1h1b,Hist1h1c,Hist1h1d,Hist1h1e,Hist1h1t,Hist1h2ab,Hist1h2ac,Hist1h2ae,Hist1h2af,Hist1h2ag,Hist1h2ah,Hist1h2ai,Hist1h2ak,Hist1h2an,Hist1h2ap,Hist1h2bb,Hist1h2bc,Hist1h2be,Hist1h2bf,Hist1h2bg,Hist1h2bh,Hist1h2bj,Hist1h2bk,Hist1h2bl,Hist1h2bm,Hist1h2bn,Hist1h2bp,Hist1h3a,Hist1h3b,Hist1h3c,Hist1h3d,Hist1h3e,Hist1h3f,Hist1h3g,Hist1h3h,Hist1h3i,Hist1h4a…	1700012L04Rik,1700054O13Rik,2810006K23Rik,Angpt1,Aqp2,Arl6,Bicd1,Ccdc40,Cenph,Cenpv,Cirbp,Cog4,Ctcf,Diap1,Diap2,Eif2a,Enah,Eps15,Eral1,Fga,Fgb,Fgg,Ghrl,Gm5132,Gtf2a2,H2-Ke2,H3f3a,Hist1h1a,Hist1h1b,Hist1h1c,Hist1h1d,Hist1h1e,Hist1h1t,Hist1h2ab,Hist1h2ac,Hist1h2ae,Hist1h2af,Hist1h2ai,Hist1h2ak,Hist1h2an,Hist1h2ap,Hist1h2bb,Hist1h2bc,Hist1h2be,Hist1h2bf,Hist1h2bg,Hist1h2bh,Hist1h2bl,Hist1h2bm,Hist1h…	NA	NA	Ang,Angpt1,Atpaf2,Celf4,Cenph,Cenpv,Cyba,Dicer1,Enah,Fkbp4,Ghrl,Grb7,Gtf2a2,H2afb1,H3f3a,Hip1,Hist1h1a,Hist1h1b,Hist1h1c,Hist1h1d,Hist1h1e,Hist1h1t,Hist1h2ab,Hist1h2ac,Hist1h2ae,Hist1h2af,Hist1h2ag,Hist1h2ah,Hist1h2ai,Hist1h2ak,Hist1h2an,Hist1h2ap,Hist1h2bb,Hist1h2bc,Hist1h2be,Hist1h2bf,Hist1h2bg,Hist1h2bh,Hist1h2bj,Hist1h2bk,Hist1h2bl,Hist1h2bm,Hist1h2bn,Hist1h2bp,Hist1h3a,Hist1h3b,Hist1h3c,Hist…	Cenpv,Cirbp,H2afx,H3f3a,H3f3b,Hist1h1a,Hist1h1b,Hist1h1c,Hist1h1d,Hist1h1e,Hist1h1t,Hist1h2ab,Hist1h2ac,Hist1h2ae,Hist1h2af,Hist1h2ag,Hist1h2ah,Hist1h2ai,Hist1h2ak,Hist1h2an,Hist1h2ap,Hist1h2bb,Hist1h2bc,Hist1h2be,Hist1h2bf,Hist1h2bg,Hist1h2bh,Hist1h2bj,Hist1h2bk,Hist1h2bl,Hist1h2bm,Hist1h2bn,Hist1h2bp,Hist1h3a,Hist1h3b,Hist1h3c,Hist1h3d,Hist1h3e,Hist1h3f,Hist1h3g,Hist1h3h,Hist1h3i,Hist1h4a,Hist1…	NA	1700012L04Rik,Ang,Cenph,Clp1,Eif3d,Eral1,Hist1h1a,Hist1h1c,Hist1h1d,Hist1h1e,Hist1h1t,Hist1h2ab,Hist1h2ac,Hist1h2ae,Hist1h2af,Hist1h2bb,Hist1h2bc,Hist1h2be,Hist1h2bf,Hist1h2bg,Hist1h2bh,Hist1h3a,Hist1h3b,Hist1h3c,Hist1h3d,Hist1h3e,Hist1h3f,Hist1h3g,Hist1h4a,Hist1h4b,Hist1h4c,Hist1h4d,Hist1h4f,Hist1h4h,Lonp1,Mtss1,Ndufs5,Psmd9,Rpsa,Tnp1,Tspyl3,Tuba4a,Tubb1,Tubb5,Tubb6,Wnt3a	NA	1700012L04Rik,2810006K23Rik,Aldob,Angpt1,Aurkb,Baz1b,Calr,Ccdc40,Cenph,Cenpv,Chrna3,Clp1,Crnkl1,Ctcf,Cyba,Diap1,Dicer1,Eif3d,Eral1,Etf1,Ghrl,Grb7,Gtf2a2,H2afx,H3f3a,Hist1h1a,Hist1h1c,Hist1h1d,Hist1h1e,Hist1h1t,Hist1h2ab,Hist1h2ac,Hist1h2ae,Hist1h2af,Hist1h2bb,Hist1h2bc,Hist1h2be,Hist1h2bf,Hist1h2bg,Hist1h2bh,Hist1h3a,Hist1h3b,Hist1h3c,Hist1h3d,Hist1h3e,Hist1h3f,Hist1h3g,Hist1h4a,Hist1h4b,Hist1h4c…	NA
GO Biological Process	cellular macromolecule metabolic process	0	0	0	0			0		0		0		0610031J06Rik,1110008L16Rik,1110034A24Rik,1190005F20Rik,1500002O20Rik,1500010J02Rik,1600027N09Rik,1810024B03Rik,2310003H01Rik,2310079F23Rik,2410022L05Rik,2510012J08Rik,2810006K23Rik,2810422J05Rik,4932415M13Rik,5930416I19Rik,6030422M02Rik,A630055G03Rik,A830007P12Rik,Aars,Aars2,Aatk,Abcf1,Abi1,Abt1,Acadm,Acan,Acd,Acin1,Acr,Actl6a,Acvr1b,Adam10,Adam9,Adh5,Adprh,Adra2b,Adrbk1,Adrbk2,Aes,Aff1,Aff3,Aim…	1110008L16Rik,9530002B09Rik,Abcg1,Abi1,Abtb1,Actl6a,Acvr1b,Adat1,Akt1,Anapc11,Apaf1,Apobec2,Apobec3,Atf3,Bach1,Bat1a,Batf3,Birc2,Birc3,Bmp7,Bop1,Camk2b,Casz1,Cbx4,Cbx7,Ccnc,Cenpv,Chst11,Cirbp,Clip3,Cltc,Cnot2,Creb3l1,Creb3l3,Ctcfl,Ctdsp1,Dapk1,Dcp1b,Ddx39,Ddx5,Denr,Dhx8,Dis3,Dmc1,Dmrtb1,Dnajb1,Dnajc8,Dnase1,Dohh,Dpf2,Dpm3,Dusp11,Eef1a1,Eef1d,Eif2c2,Eif4a3,Eme2,Ets1,Eya3,Fars2,Fbxo11,Fgr,Fkbp10,Fk…	1110008L16Rik,1110018G07Rik,1110054O05Rik,1190005F20Rik,1700012L04Rik,1700054O13Rik,1810024B03Rik,2210012G02Rik,2310003H01Rik,2700078E11Rik,2810006K23Rik,A730011L01Rik,Aak1,Abca1,Abi1,Acadm,Acd,Actr5,Adad2,Adam10,Adam9,Adck1,Adora1,Adprh,Adrb1,Adrbk2,Aff1,Aff3,Agl,Agtpbp1,Aimp1,Aip,Alas2,Alg6,Alkbh8,Alpk2,Als2,Alx3,Alx4,Amhr2,Anapc10,Anapc16,Anp32a,Aph1a,Aplf,Apobec3,Arid3a,Arid4b,Arid5a,Arntl,Ar…	1110008L16Rik,1110034A24Rik,1190005F20Rik,1500002O20Rik,1500010J02Rik,2210012G02Rik,2310003H01Rik,2810422J05Rik,Aak1,Abi1,Acd,Actl6a,Adad2,Adam9,Adat1,Adrbk2,Alpk2,Amhr2,Anapc11,Anapc2,Aph1a,Aplf,Art1,Art5,Ascc2,Asphd2,Atoh8,Atxn7l3,Aurkb,Axl,B3gnt2,B3gnt7,B4galt1,Bach2,Bap1,Bcl11a,Bcl3,Bclaf1,Bgn,Bhlha15,Bmp2k,Bop1,Bptf,Brf1,Brf2,Brpf1,Brpf3,Brsk1,Bzw2,Calr,Camk1d,Camkk1,Casc3,Cbfa2t3,Cblc,Cdc40…	NA	NA	2500003M10Rik,Abcg1,Acvrl1,Aicda,Aimp1,Apobec2,Banp,Bclaf1,Bmp7,Btg1,Cars2,Cbfa2t3,Ccnl1,Cdk12,Cdk13,Cdt1,Cenpv,Cirbp,Cited2,Cltc,Cops4,Creb3l3,Csf1r,Ctcfl,Ctu2,Dapk1,Ddit3,Ddx39,Ddx5,Dnajb1,Dnajc8,Dusp1,Dusp5,Ebf4,Eef1a1,Eef1e1,Eif4a1,Eme2,Epha10,Eprs,Erbb3,Ern1,Eya3,Gata2,Gli1,Gmeb1,Gtf2f1,H2afx,H3f3a,H3f3b,Hars,Hars2,Hes2,Hes3,Hipk4,Hist1h1a,Hist1h1b,Hist1h1c,Hist1h1d,Hist1h1e,Hist1h1t,Hist1h2…	NA	0610007P22Rik,1110008L16Rik,1500002O20Rik,1700012L04Rik,2210012G02Rik,2310035K24Rik,4921509C19Rik,Abt1,Adprhl1,Agl,Alas2,Alpk1,Ang,Apobec3,Apom,Arx,Atoh8,Aurka,B2m,B4galt1,Bahd1,Bap1,Bcl11a,Birc2,Birc3,Bmp7,Brd7,Brpf3,Brsk1,Camk2g,Carhsp1,Carm1,Cbfa2t3,Cbx7,Ccnb1,Cct2,Cdc42bpg,Cdc6,Cdca5,Cdk7,Cdkl1,Cdt1,Cep164,Chst14,Cidea,Cit,Cited4,Clk2,Clk3,Clp1,Creb3l3,Crtc3,Csda,Csrnp1,Cstf1,Ctcfl,Ctr9,Ctu2,…	NA	0610031J06Rik,1110008L16Rik,1110018G07Rik,1500002O20Rik,1500010J02Rik,1700012L04Rik,2210018M11Rik,2310003H01Rik,2310035K24Rik,2810006K23Rik,2810422J05Rik,A630055G03Rik,A930038C07Rik,Aak1,Abca1,Abcf1,Abcg1,Abtb1,Acd,Acin1,Acp1,Acr,Actl6a,Actl6b,Actr5,Adad2,Adam9,Adat1,Adck1,Adrb1,Adrbk2,Aes,Aff1,Aff3,Aimp2,Aip,Akna,Akt1,Alas2,Alkbh2,Alkbh8,Alpk3,Als2,Amfr,Anp32a,Aplf,Apoa1,Apoa4,Apoa5,Apobec2,Apoc…	NA
GO Biological Process	cellular metabolic process	0	0	0	0			0		0		0		0610031J06Rik,1110008L16Rik,1110034A24Rik,1190003J15Rik,1190005F20Rik,1500002O20Rik,1500010J02Rik,1600027N09Rik,1810014F10Rik,1810024B03Rik,2010111I01Rik,2310003H01Rik,2310079F23Rik,2410022L05Rik,2510012J08Rik,2810006K23Rik,2810422J05Rik,4932415M13Rik,5133401N09Rik,5930416I19Rik,6030422M02Rik,A230051G13Rik,A530098C11Rik,A630055G03Rik,A830007P12Rik,AI462493,Aacs,Aars,Aars2,Aasdh,Aatk,Abat,Abca2,Ab…	1110008L16Rik,1190003J15Rik,5430411K18Rik,9530002B09Rik,A3galt2,AI314976,Abca7,Abcb10,Abcb9,Abcc1,Abcg1,Abi1,Abtb1,Accs,Accsl,Ace,Acsbg2,Acss2,Actl6a,Acvr1b,Adat1,Adssl1,Afmid,Ak3,Akt1,Alas1,Alox12b,Alox8,Amd2,Anapc11,Apaf1,Apobec2,Apobec3,Aqp1,Arsg,Asns,Atf3,Atp13a1,Atp1a2,Atp1b1,Atp5d,Atp6v1g2,Bach1,Bat1a,Batf3,Birc2,Birc3,Blvra,Bmp7,Bop1,Cacna1a,Camk2b,Car6,Casz1,Cbx4,Cbx7,Ccbl1,Ccnc,Cel,Cenpv…	1110008L16Rik,1110018G07Rik,1110020G09Rik,1110054O05Rik,1190003J15Rik,1190005F20Rik,1300010F03Rik,1700012L04Rik,1700021K19Rik,1700054O13Rik,1810014F10Rik,1810024B03Rik,2210012G02Rik,2310003H01Rik,2700078E11Rik,2810006K23Rik,5430411K18Rik,A3galt2,A730011L01Rik,AB099516,Aak1,Abca1,Abca3,Abca4,Abcb6,Abcc1,Abcc4,Abcc6,Abce1,Abcg2,Abhd5,Abi1,Acadm,Acadvl,Acd,Ace,Acer3,Aco1,Acot10,Acsbg1,Acsbg2,Acsf3,A…	1110008L16Rik,1110020G09Rik,1110034A24Rik,1190005F20Rik,1500002O20Rik,1500010J02Rik,2210012G02Rik,2310003H01Rik,2810405K02Rik,2810422J05Rik,A230051G13Rik,Aak1,Abat,Abcb6,Abcb9,Abcc1,Abcc3,Abcc5,Abi1,Acaa1a,Acaca,Acd,Acsf3,Actl6a,Ada,Adad2,Adam9,Adat1,Adc,Adck5,Adipor1,Adrbk2,Ahcy,Ahcyl2,Ak2,Alad,Alpi,Alpk2,Alppl2,Amhr2,Ampd3,Anapc11,Anapc2,Aph1a,Aplf,Apob48r,Aprt,Arl2,Art1,Art5,Ascc2,Aspdh,Asphd2…	NA	NA	1110005A03Rik,2500003M10Rik,A3galt2,A530098C11Rik,AI314976,Abcg1,Acsf3,Acvrl1,Aicda,Aimp1,Apobec2,Aprt,Arl4a,Atp5d,Banp,Bclaf1,Blvrb,Bmp7,Btg1,Cacna1a,Car5a,Cars2,Cat,Cbfa2t3,Ccnl1,Cdk12,Cdk13,Cdt1,Cenpv,Cirbp,Cited2,Cltc,Cops4,Creb3l3,Csf1r,Ctcfl,Ctu2,Dapk1,Ddah2,Ddit3,Ddit4,Ddx39,Ddx5,Diras1,Dnajb1,Dnajc8,Dusp1,Dusp5,Ebf4,Eef1a1,Eef1e1,Eif4a1,Eme2,Epha10,Eprs,Erbb3,Ern1,Eya3,Ftcd,Gapdh,Gata2,Gl…	NA	0610007P22Rik,1110008L16Rik,1500002O20Rik,1700012L04Rik,2210012G02Rik,2310035K24Rik,2810405K02Rik,4921509C19Rik,Abcb6,Abcb9,Abcg2,Abcg4,Abt1,Acer3,Acmsd,Acp5,Acsf3,Acss1,Adprhl1,Agl,Agpat4,Aifm3,Ak7,Alas2,Aldh9a1,Alpk1,Ampd3,Ang,Apobec3,Apom,Aprt,Arl2,Arsg,Arx,Atg14,Atg9a,Atoh8,Atp1b2,Atp5s,Atp8b1,Aurka,B2m,B4galt1,Bahd1,Bap1,Bcl11a,Birc2,Birc3,Blvrb,Bmp7,Bpgm,Brd7,Brpf3,Brsk1,Camk2g,Car2,Car3,Ca…	NA	0610031J06Rik,1110008L16Rik,1110018G07Rik,1500002O20Rik,1500010J02Rik,1700012L04Rik,2210018M11Rik,2310003H01Rik,2310035K24Rik,2810006K23Rik,2810405K02Rik,2810422J05Rik,4832428D23Rik,5430411K18Rik,6430598A04Rik,A230051G13Rik,A630055G03Rik,A930038C07Rik,AB099516,AI314976,Aacs,Aak1,Abca1,Abca2,Abca4,Abcb10,Abcb4,Abcb6,Abcb9,Abcc1,Abcc4,Abcc5,Abcc6,Abcc9,Abcf1,Abcg1,Abcg2,Abhd5,Abtb1,Acaa1a,Acaa2,Aca…	NA
GO Biological Process	cellular nitrogen compound metabolic process	0	0	0	0			0		0		0		0610031J06Rik,1110008L16Rik,1190003J15Rik,1190005F20Rik,1500002O20Rik,1500010J02Rik,1600027N09Rik,2310003H01Rik,2310079F23Rik,2410022L05Rik,2510012J08Rik,5930416I19Rik,6030422M02Rik,A230051G13Rik,A630055G03Rik,Aars,Aars2,Abat,Abca2,Abcb4,Abcb6,Abcb9,Abcc1,Abcc3,Abcc6,Abce1,Abcf1,Abt1,Acadl,Acadm,Accs,Accsl,Acd,Acer3,Acin1,Actl6a,Acy1,Ada,Adc,Adcy10,Adcy2,Adssl1,Aes,Aff1,Aff3,Afmid,Agmat,Ak2,Ak3,A…	1110008L16Rik,1190003J15Rik,AI314976,Abca7,Abcb10,Abcb9,Abcc1,Abcg1,Accs,Accsl,Actl6a,Adat1,Adssl1,Afmid,Ak3,Alas1,Amd2,Apaf1,Apobec2,Apobec3,Aqp1,Asns,Atf3,Atp13a1,Atp1a2,Atp1b1,Atp5d,Atp6v1g2,Bach1,Bat1a,Batf3,Blvra,Bop1,Cacna1a,Casz1,Cbx4,Cbx7,Ccbl1,Ccnc,Cenpv,Cirbp,Cnot2,Creb3l1,Creb3l3,Ctcfl,Dcp1b,Ddx39,Ddx5,Dhx8,Diras1,Diras2,Dis3,Dmc1,Dmrtb1,Dnase1,Dohh,Dpf2,Eef1a1,Eif2c2,Eif4a3,Eme2,Ets1,…	1110008L16Rik,1110054O05Rik,1190003J15Rik,1190005F20Rik,1300010F03Rik,1700012L04Rik,1700054O13Rik,2210012G02Rik,2310003H01Rik,A730011L01Rik,Abca1,Abca3,Abca4,Abcb6,Abcc1,Abcc4,Abcc6,Abce1,Abcg2,Acadm,Acd,Acer3,Actr5,Ada,Adad2,Adc,Adcy4,Aff1,Aff3,Agap3,Ak2,Ak7,Alas2,Aldh18a1,Aldh1l1,Aldh4a1,Aldh6a1,Alkbh8,Alx3,Alx4,Amt,Anp32a,Aoc2,Aplf,Apobec3,Aprt,Arid3a,Arid4b,Arid5a,Arl2,Arl4a,Arntl,Arx,Asns,As…	1110008L16Rik,1190005F20Rik,1500002O20Rik,1500010J02Rik,2210012G02Rik,2310003H01Rik,A230051G13Rik,Abat,Abcb6,Abcb9,Abcc1,Abcc3,Abcc5,Acd,Actl6a,Ada,Adad2,Adat1,Adc,Ak2,Alad,Ampd3,Aplf,Aprt,Arl2,Ascc2,Aspdh,Atoh8,Atp13a1,Atp1b2,Atp2c2,Atp4b,Atp5b,Atp5c1,Atp5j2,Atp5k,Atp5s,Atp6v1a,Atxn7l3,BC016495,Bach2,Bcl11a,Bcl3,Bclaf1,Bhlha15,Blvrb,Bop1,Bptf,Brf1,Brf2,Bzw2,Cacnb4,Casc3,Cbfa2t3,Cdc40,Cdca5,Cdt1,…	NA	NA	2500003M10Rik,AI314976,Abcg1,Aicda,Apobec2,Aprt,Arl4a,Atp5d,Banp,Bclaf1,Blvrb,Cacna1a,Cars2,Cbfa2t3,Ccnl1,Cdk12,Cdk13,Cdt1,Cenpv,Cirbp,Cited2,Creb3l3,Ctcfl,Ctu2,Ddah2,Ddit3,Ddx39,Ddx5,Diras1,Ebf4,Eef1a1,Eef1e1,Eme2,Eprs,Ern1,Eya3,Ftcd,Gata2,Gli1,Gm266,Gmeb1,Gtf2f1,H2afx,H3f3a,H3f3b,Hars,Hars2,Hes2,Hes3,Hist1h1a,Hist1h1b,Hist1h1c,Hist1h1d,Hist1h1e,Hist1h1t,Hist1h2ab,Hist1h2ac,Hist1h2ae,Hist1h2af,H…	NA	0610007P22Rik,1110008L16Rik,1500002O20Rik,1700012L04Rik,2210012G02Rik,2310035K24Rik,Abcb6,Abcb9,Abcg2,Abcg4,Abt1,Acer3,Ak7,Alas2,Aldh9a1,Ampd3,Ang,Apobec3,Aprt,Arl2,Arx,Atoh8,Atp1b2,Atp5s,Bahd1,Bcl11a,Blvrb,Brd7,Carhsp1,Carm1,Cbfa2t3,Cbx7,Cdc6,Cdca5,Cdk7,Cdt1,Cep164,Cidea,Cited4,Clp1,Comt,Cpox,Creb3l3,Crtc3,Csda,Csrnp1,Cstf1,Ctcfl,Ctps2,Ctu2,Cul4a,Dcps,Dimt1,Diras1,Dnahc1,Dnahc2,Dnase2a,Dnttip2,D…	NA	0610031J06Rik,1110008L16Rik,1500002O20Rik,1500010J02Rik,1700012L04Rik,2210018M11Rik,2310003H01Rik,2310035K24Rik,A230051G13Rik,A630055G03Rik,AI314976,Abca1,Abca2,Abca4,Abcb10,Abcb4,Abcb6,Abcb9,Abcc1,Abcc4,Abcc5,Abcc6,Abcc9,Abcf1,Abcg1,Abcg2,Acd,Acin1,Actl6a,Actl6b,Actr5,Acy1,Ada,Adad2,Adat1,Adc,Adcy10,Adcy4,Adcy6,Adcy9,Adssl1,Aes,Aff1,Aff3,Afmid,Agmat,Ak2,Ak7,Ak8,Akna,Alad,Alas2,Aldh1l1,Aldh4a1,Al…	NA
GO Biological Process	cellular process	0		0	0					0		0		0610009O20Rik,0610031J06Rik,0610037P05Rik,1110008J03Rik,1110008L16Rik,1110034A24Rik,1190002H23Rik,1190003J15Rik,1190005F20Rik,1300017J02Rik,1500002O20Rik,1500010J02Rik,1600027N09Rik,1700018F24Rik,1810014F10Rik,1810024B03Rik,2010002M12Rik,2010111I01Rik,2300002M23Rik,2310003H01Rik,2310016C08Rik,2310079F23Rik,2400003C14Rik,2410022L05Rik,2410091C18Rik,2510003E04Rik,2510012J08Rik,2610301G19Rik,2810002…	NA	0610037P05Rik,1110008J03Rik,1110008L16Rik,1110018G07Rik,1110020G09Rik,1110054O05Rik,1190002H23Rik,1190003J15Rik,1190005F20Rik,1300010F03Rik,1500003O03Rik,1700001J03Rik,1700012L04Rik,1700021K19Rik,1700054O13Rik,1810014F10Rik,1810024B03Rik,2010002M12Rik,2210012G02Rik,2310003H01Rik,2510003E04Rik,2700078E11Rik,2810006K23Rik,2810021B07Rik,4933400A11Rik,5430411K18Rik,A3galt2,A730011L01Rik,AB099516,AI31…	0610037P05Rik,1110008L16Rik,1110020G09Rik,1110034A24Rik,1190002H23Rik,1190005F20Rik,1500002O20Rik,1500010J02Rik,2210012G02Rik,2310003H01Rik,2400003C14Rik,2810405K02Rik,2810422J05Rik,4930453N24Rik,A230051G13Rik,Aak1,Abat,Abcb6,Abcb9,Abcc1,Abcc3,Abcc5,Abi1,Ablim2,Acaa1a,Acaca,Accn4,Acd,Acsf3,Actg1,Actl6a,Actn4,Ada,Adad2,Adam17,Adam9,Adamtsl4,Adat1,Adc,Adck5,Add2,Adipor1,Adm2,Adora2a,Adrbk2,Afap1,Af…	NA	NA	NA	NA	0610007P22Rik,1110008L16Rik,1500002O20Rik,1700012L04Rik,2210012G02Rik,2310035K24Rik,2810405K02Rik,2900073G15Rik,4921509C19Rik,Abcb6,Abcb9,Abcg2,Abcg4,Abt1,Acap1,Acer3,Acmsd,Acp5,Acsf3,Acss1,Add2,Adm2,Adprhl1,Adrb2,Afg3l2,Agfg1,Agl,Agpat4,Aifm3,Aim2,Ak7,Alas2,Aldh9a1,Alpk1,Amigo3,Ampd3,Ang,Ankrd27,Ap3m1,Apobec3,Apom,Appbp2,Aprt,Aqp8,Arfgap3,Arhgef12,Arl2,Arrdc2,Arsg,Arvcf,Arx,Asb2,Asb6,Atg14,Atg9a…	NA	0610009O20Rik,0610031J06Rik,0610037P05Rik,1110008J03Rik,1110008L16Rik,1110018G07Rik,1190002H23Rik,1300017J02Rik,1500002O20Rik,1500010J02Rik,1700001J03Rik,1700012L04Rik,1810046J19Rik,2010001E11Rik,2010002M12Rik,2210018M11Rik,2310003H01Rik,2310016C08Rik,2310035K24Rik,2700094K13Rik,2810006K23Rik,2810405K02Rik,2810422J05Rik,2900073G15Rik,4832428D23Rik,4930453N24Rik,4933400A11Rik,5430411K18Rik,6430598…	NA
GO Biological Process	cellular protein metabolic process	0		0								0		1110034A24Rik,1810024B03Rik,2410022L05Rik,2810006K23Rik,2810422J05Rik,4932415M13Rik,A830007P12Rik,Aars,Aars2,Aatk,Abcf1,Abi1,Acr,Actl6a,Acvr1b,Adam10,Adam9,Adh5,Adprh,Adra2b,Adrbk1,Adrbk2,Aimp2,Akt1,Akt3,Alpk3,Amhr2,Anapc10,Anapc11,Anapc13,Anapc4,Anapc5,Apoa2,Arrb2,Art4,Asph,Asphd2,Atp7a,Aurkb,Axl,B2m,B3galt4,B3gnt7,B3gnt9-ps,B4galnt2,B4galt1,Bap1,Bard1,Bbs10,Bcl11a,Birc2,Birc3,Bmp2k,Bmp7,Bmpr2,B…	NA	1110018G07Rik,1810024B03Rik,2700078E11Rik,2810006K23Rik,Aak1,Abca1,Abi1,Adam10,Adam9,Adck1,Adora1,Adprh,Adrbk2,Agtpbp1,Aimp1,Aip,Alg6,Alpk2,Amhr2,Anapc10,Anapc16,Aph1a,Asphd2,Atg10,Atg5,Atp7a,Axl,B2m,B3galt4,B3gnt2,B3gnt4,B4galnt2,B4galt1,Bbs10,Bcl11a,Birc2,Birc3,Blk,Bmp2k,Bmpr2,Bmx,Bnip3l,Brcc3,Brd8,Brpf3,Btrc,Camk1d,Camk2d,Camk2g,Camkk1,Cask,Cbl,Ccnb1,Ccr7,Cct2,Cct8l1,Cd81,Cdc14a,Cdc23,Cdc27,Cd…	NA	NA	NA	NA	NA	NA	NA	1110018G07Rik,2810006K23Rik,2810422J05Rik,A930038C07Rik,Aak1,Abca1,Abcf1,Abtb1,Acp1,Acr,Actl6a,Adam9,Adck1,Adrbk2,Aimp2,Aip,Akt1,Alpk3,Amfr,Arrb1,Art4,Asph,Asphd2,Atm,Atp7a,Aurkb,Axl,B230120H23Rik,B2m,B3galt2,B3gnt2,B3gnt7,B4galnt2,B4galt1,Bap1,Baz1b,Birc2,Birc3,Bmp2k,Bmpr1a,Bmpr2,Bmx,Brap,Brcc3,Brf1,Brpf3,Brsk1,Brsk2,Btg2,Calr,Calr3,Camk2g,Camkk2,Canx,Cask,Cbl,Ccnb1,Ccne1,Ccr7,Cct2,Cdc14a,Cdc16,…	NA
GO Biological Process	chromatin assembly	0	0				7.30237e-227	0		1.11243e-142		0		Chaf1a,Chaf1b,Ctcf,H1fx,H2afb1,H2afj,H2afx,H2afy,H3f3a,Hist1h1a,Hist1h1b,Hist1h1c,Hist1h1d,Hist1h1e,Hist1h1t,Hist1h2ab,Hist1h2ac,Hist1h2ae,Hist1h2af,Hist1h2ai,Hist1h2ak,Hist1h2an,Hist1h2ap,Hist1h2bb,Hist1h2bc,Hist1h2be,Hist1h2bf,Hist1h2bg,Hist1h2bh,Hist1h2bl,Hist1h2bm,Hist1h2bn,Hist1h2bp,Hist1h3a,Hist1h3b,Hist1h3c,Hist1h3d,Hist1h3e,Hist1h3f,Hist1h3g,Hist1h3h,Hist1h3i,Hist1h4a,Hist1h4b,Hist1h4c,Hi…	Cenpv,H2afx,Hist1h1a,Hist1h1b,Hist1h1c,Hist1h1d,Hist1h1e,Hist1h1t,Hist1h2ab,Hist1h2ac,Hist1h2ae,Hist1h2af,Hist1h2ag,Hist1h2ah,Hist1h2ai,Hist1h2ak,Hist1h2an,Hist1h2ap,Hist1h2bb,Hist1h2bc,Hist1h2be,Hist1h2bf,Hist1h2bg,Hist1h2bh,Hist1h2bj,Hist1h2bk,Hist1h2bl,Hist1h2bm,Hist1h2bn,Hist1h2bp,Hist1h3a,Hist1h3b,Hist1h3c,Hist1h3d,Hist1h3e,Hist1h3f,Hist1h3g,Hist1h3h,Hist1h3i,Hist1h4a,Hist1h4b,Hist1h4c,Hist1…	NA	NA	NA	Bahd1,Cenpv,H2afb1,H3f3a,Hist1h1a,Hist1h1b,Hist1h1c,Hist1h1d,Hist1h1e,Hist1h1t,Hist1h2ab,Hist1h2ac,Hist1h2ae,Hist1h2af,Hist1h2ag,Hist1h2ah,Hist1h2ai,Hist1h2ak,Hist1h2an,Hist1h2ap,Hist1h2bb,Hist1h2bc,Hist1h2be,Hist1h2bf,Hist1h2bg,Hist1h2bh,Hist1h2bj,Hist1h2bk,Hist1h2bl,Hist1h2bm,Hist1h2bn,Hist1h2bp,Hist1h3a,Hist1h3b,Hist1h3c,Hist1h3d,Hist1h3e,Hist1h3f,Hist1h3g,Hist1h3h,Hist1h3i,Hist1h4a,Hist1h4b,H…	Cenpv,H2afx,H3f3a,H3f3b,Hist1h1a,Hist1h1b,Hist1h1c,Hist1h1d,Hist1h1e,Hist1h1t,Hist1h2ab,Hist1h2ac,Hist1h2ae,Hist1h2af,Hist1h2ag,Hist1h2ah,Hist1h2ai,Hist1h2ak,Hist1h2an,Hist1h2ap,Hist1h2bb,Hist1h2bc,Hist1h2be,Hist1h2bf,Hist1h2bg,Hist1h2bh,Hist1h2bj,Hist1h2bk,Hist1h2bl,Hist1h2bm,Hist1h2bn,Hist1h2bp,Hist1h3a,Hist1h3b,Hist1h3c,Hist1h3d,Hist1h3e,Hist1h3f,Hist1h3g,Hist1h3h,Hist1h3i,Hist1h4a,Hist1h4b,Hi…	NA	1700012L04Rik,Bahd1,Hist1h1a,Hist1h1c,Hist1h1d,Hist1h1e,Hist1h1t,Hist1h2ab,Hist1h2ac,Hist1h2ae,Hist1h2af,Hist1h2bb,Hist1h2bc,Hist1h2be,Hist1h2bf,Hist1h2bg,Hist1h2bh,Hist1h3a,Hist1h3b,Hist1h3c,Hist1h3d,Hist1h3e,Hist1h3f,Hist1h3g,Hist1h4a,Hist1h4b,Hist1h4c,Hist1h4d,Hist1h4f,Hist1h4h,Tspyl3	NA	1700012L04Rik,Bahd1,Cenpv,Chaf1b,Ctcf,H2afx,H3f3a,Hist1h1a,Hist1h1c,Hist1h1d,Hist1h1e,Hist1h1t,Hist1h2ab,Hist1h2ac,Hist1h2ae,Hist1h2af,Hist1h2bb,Hist1h2bc,Hist1h2be,Hist1h2bf,Hist1h2bg,Hist1h2bh,Hist1h3a,Hist1h3b,Hist1h3c,Hist1h3d,Hist1h3e,Hist1h3f,Hist1h3g,Hist1h4a,Hist1h4b,Hist1h4c,Hist1h4d,Hist1h4f,Hist1h4h,Hist2h2ab,Hist2h2ac,Hist2h2bb,Hist2h2be,Hist2h3b,Hist2h3c1,Hist2h4,Hist3h2a,Hist3h2ba,H…	NA
GO Biological Process	chromatin assembly or disassembly	0	0				1.13054e-225	0		8.3216e-147		0		Chaf1a,Chaf1b,Chd1,Ctcf,H1fx,H2afb1,H2afj,H2afx,H2afy,H3f3a,Hist1h1a,Hist1h1b,Hist1h1c,Hist1h1d,Hist1h1e,Hist1h1t,Hist1h2ab,Hist1h2ac,Hist1h2ae,Hist1h2af,Hist1h2ai,Hist1h2ak,Hist1h2an,Hist1h2ap,Hist1h2bb,Hist1h2bc,Hist1h2be,Hist1h2bf,Hist1h2bg,Hist1h2bh,Hist1h2bl,Hist1h2bm,Hist1h2bn,Hist1h2bp,Hist1h3a,Hist1h3b,Hist1h3c,Hist1h3d,Hist1h3e,Hist1h3f,Hist1h3g,Hist1h3h,Hist1h3i,Hist1h4a,Hist1h4b,Hist1h…	Cenpv,H2afx,Hist1h1a,Hist1h1b,Hist1h1c,Hist1h1d,Hist1h1e,Hist1h1t,Hist1h2ab,Hist1h2ac,Hist1h2ae,Hist1h2af,Hist1h2ag,Hist1h2ah,Hist1h2ai,Hist1h2ak,Hist1h2an,Hist1h2ap,Hist1h2bb,Hist1h2bc,Hist1h2be,Hist1h2bf,Hist1h2bg,Hist1h2bh,Hist1h2bj,Hist1h2bk,Hist1h2bl,Hist1h2bm,Hist1h2bn,Hist1h2bp,Hist1h3a,Hist1h3b,Hist1h3c,Hist1h3d,Hist1h3e,Hist1h3f,Hist1h3g,Hist1h3h,Hist1h3i,Hist1h4a,Hist1h4b,Hist1h4c,Hist1…	NA	NA	NA	Bahd1,Cenpv,H2afb1,H3f3a,Hist1h1a,Hist1h1b,Hist1h1c,Hist1h1d,Hist1h1e,Hist1h1t,Hist1h2ab,Hist1h2ac,Hist1h2ae,Hist1h2af,Hist1h2ag,Hist1h2ah,Hist1h2ai,Hist1h2ak,Hist1h2an,Hist1h2ap,Hist1h2bb,Hist1h2bc,Hist1h2be,Hist1h2bf,Hist1h2bg,Hist1h2bh,Hist1h2bj,Hist1h2bk,Hist1h2bl,Hist1h2bm,Hist1h2bn,Hist1h2bp,Hist1h3a,Hist1h3b,Hist1h3c,Hist1h3d,Hist1h3e,Hist1h3f,Hist1h3g,Hist1h3h,Hist1h3i,Hist1h4a,Hist1h4b,H…	Cenpv,H2afx,H3f3a,H3f3b,Hist1h1a,Hist1h1b,Hist1h1c,Hist1h1d,Hist1h1e,Hist1h1t,Hist1h2ab,Hist1h2ac,Hist1h2ae,Hist1h2af,Hist1h2ag,Hist1h2ah,Hist1h2ai,Hist1h2ak,Hist1h2an,Hist1h2ap,Hist1h2bb,Hist1h2bc,Hist1h2be,Hist1h2bf,Hist1h2bg,Hist1h2bh,Hist1h2bj,Hist1h2bk,Hist1h2bl,Hist1h2bm,Hist1h2bn,Hist1h2bp,Hist1h3a,Hist1h3b,Hist1h3c,Hist1h3d,Hist1h3e,Hist1h3f,Hist1h3g,Hist1h3h,Hist1h3i,Hist1h4a,Hist1h4b,Hi…	NA	1700012L04Rik,Bahd1,Hist1h1a,Hist1h1c,Hist1h1d,Hist1h1e,Hist1h1t,Hist1h2ab,Hist1h2ac,Hist1h2ae,Hist1h2af,Hist1h2bb,Hist1h2bc,Hist1h2be,Hist1h2bf,Hist1h2bg,Hist1h2bh,Hist1h3a,Hist1h3b,Hist1h3c,Hist1h3d,Hist1h3e,Hist1h3f,Hist1h3g,Hist1h4a,Hist1h4b,Hist1h4c,Hist1h4d,Hist1h4f,Hist1h4h,Tnp1,Tspyl3	NA	1700012L04Rik,Actl6b,Bahd1,Baz1b,Cenpv,Chaf1b,Ctcf,H2afx,H3f3a,Hist1h1a,Hist1h1c,Hist1h1d,Hist1h1e,Hist1h1t,Hist1h2ab,Hist1h2ac,Hist1h2ae,Hist1h2af,Hist1h2bb,Hist1h2bc,Hist1h2be,Hist1h2bf,Hist1h2bg,Hist1h2bh,Hist1h3a,Hist1h3b,Hist1h3c,Hist1h3d,Hist1h3e,Hist1h3f,Hist1h3g,Hist1h4a,Hist1h4b,Hist1h4c,Hist1h4d,Hist1h4f,Hist1h4h,Hist2h2ab,Hist2h2ac,Hist2h2bb,Hist2h2be,Hist2h3b,Hist2h3c1,Hist2h4,Hist3h2…	NA
GO Biological Process	defense response	0		0			0					0		2010002M12Rik,AY761184,Adamts13,Akt1,Als2,Apaf1,Apoa2,Apoa4,Axl,B2m,B4galt1,BC013712,Bcl10,Bcl3,C1ra,C1rb,C1rl,C1s,C2,C4b,C4bp,C8g,Calca,Card9,Ccl11,Ccl2,Ccl3,Ccl5,Ccl7,Ccr1,Ccr2,Ccr4,Ccr5,Ccr7,Cd163,Cd207,Cd24a,Cd300a,Cd44,Cd74,Cebpa,Cebpe,Cela1,Cfb,Chid1,Clec2d,Clec4d,Clec4n,Clec5a,Clec7a,Cnpy3,Cnr2,Colec10,Cotl1,Cr1l,Cxcl1,Cxcl15,Cxcl16,Cxcl2,Cxcl3,Cxcl5,Cxcr2,Cyp27b1,Cysltr1,Darc,Defa-rs1,Def…	NA	2010002M12Rik,AY761184,Adora3,Aimp1,Alox5,Als2,Axl,B2m,B4galt1,Bcl10,Bnip3l,Bst2,C2,C3,C4b,Camk1d,Card9,Casp6,Ccr1,Ccr2,Ccr5,Ccr7,Ccrl2,Cd24a,Cd40lg,Cd44,Cd55,Cfb,Cited1,Clec4d,Clec4n,Cnpy3,Cnr2,Cr1l,Ctsg,Cxcl9,Cybb,Daf2,Defa-rs1,Defa-rs7,Defa17,Defa20,Defa21,Defa22,Defa25,Defa26,Defa3,Defa5,Defa6,Defb1,Defb10,Defb11,Defb12,Defb13,Defb14,Defb15,Defb2,Defb3,Defb34,Defb35,Defb37,Defb38,Defb39,Defb4…	NA	NA	AY761184,Adora3,Akt1,Bst2,C1ra,C1rb,C1rl,C1s,C3,C4bp,Camk1d,Camp,Ccr4,Ccrl2,Cd14,Cd24a,Cd300a,Cd55,Chid1,Clec2h,Clec4d,Clec4n,Clec5a,Cnr2,Cotl1,Cxcl16,Cxcr2,Cyba,Daf2,Defa-rs1,Defa-rs7,Defa17,Defa20,Defa21,Defa22,Defa25,Defa26,Defa3,Defa5,Defa6,Defb1,Defb10,Defb11,Defb12,Defb13,Defb14,Defb15,Defb2,Defb3,Defb34,Defb35,Defb37,Defb38,Defb39,Defb4,Defb40,Defb5,Defb50,Defb6,Defb7,Defb8,Defb9,Dhx58,Dic…	NA	NA	NA	NA	2010002M12Rik,AY761184,Acp5,Adora3,Akt1,Alox5,Als2,Apoa4,Axl,B2m,B4galt1,BC013712,Bcl10,Bst2,C5ar1,C8g,Ccl17,Ccl22,Ccr1,Ccr2,Ccr5,Ccr7,Ccrl2,Cd24a,Cd40lg,Cd44,Cd55,Cebpe,Cela1,Chid1,Clec2h,Clec4d,Clec4n,Cnpy3,Cnr2,Ctsg,Cxcl1,Cxcl15,Cxcl2,Cxcl3,Cxcl5,Cyba,Daf2,Darc,Defa-rs1,Defa-rs7,Defa17,Defa20,Defa21,Defa22,Defa25,Defa26,Defa3,Defa5,Defa6,Defb1,Defb10,Defb11,Defb12,Defb13,Defb14,Defb15,Defb2,De…	NA
GO Biological Process	defense response to bacterium	0		0			0							Bcl3,Card9,Ccr5,Cebpe,Defa-rs7,Defa17,Defa20,Defa21,Defa22,Defa25,Defa26,Defa3,Defa5,Defa6,Defb1,Defb10,Defb11,Defb12,Defb13,Defb14,Defb15,Defb19,Defb2,Defb25,Defb3,Defb34,Defb35,Defb36,Defb37,Defb38,Defb39,Defb4,Defb40,Defb5,Defb50,Defb6,Defb7,Defb8,Defb9,Fcer1g,Fcgr1,Fgr,Gbp2,Gbp3,Gm10104,Gm14850,Gm15284,Gm15292,Gm15293,Gm15299,Gm15308,Gm15315,Gm6696,H2-K1,Hamp,Hamp2,Ifna1,Il6,Il6ra,Irf8,Leap2,…	NA	Card9,Ccr5,Ctsg,Defa-rs7,Defa17,Defa20,Defa21,Defa22,Defa25,Defa26,Defa3,Defa5,Defa6,Defb1,Defb10,Defb11,Defb12,Defb13,Defb14,Defb15,Defb2,Defb3,Defb34,Defb35,Defb37,Defb38,Defb39,Defb4,Defb40,Defb5,Defb50,Defb6,Defb7,Defb8,Defb9,Fgr,Gm10104,Gm14850,Gm15284,Gm15292,Gm15293,Gm15299,Gm15308,Gm15315,Gm6696,H2-K1,Iigp1,Leap2,Nos2,Spag11a,Spag11b,Spn	NA	NA	Camp,Defa-rs7,Defa17,Defa20,Defa21,Defa22,Defa25,Defa26,Defa3,Defa5,Defa6,Defb1,Defb10,Defb11,Defb12,Defb13,Defb14,Defb15,Defb2,Defb3,Defb34,Defb35,Defb37,Defb38,Defb39,Defb4,Defb40,Defb5,Defb50,Defb6,Defb7,Defb8,Defb9,Gbp9,Gm10104,Gm14850,Gm15284,Gm15292,Gm15293,Gm15299,Gm15308,Gm15315,Gm6696,Iigp1,Il12a,Leap2,Mbl2,Mpa2l,Ncf1,Nos2,P2rx7,Spag11a,Spag11b,Spn,Stab1,Tnfrsf1a	NA	NA	NA	NA	NA	NA
GO Biological Process	DNA conformation change	0	0	0			1.37974e-303	0		7.87581e-157		0		Acin1,Akap8,Cdk1,Chaf1a,Chaf1b,Ctcf,Dffb,Fshr,H1fx,H2afb1,H2afj,H2afx,H2afy,H3f3a,Hhex,Hist1h1a,Hist1h1b,Hist1h1c,Hist1h1d,Hist1h1e,Hist1h1t,Hist1h2ab,Hist1h2ac,Hist1h2ae,Hist1h2af,Hist1h2ai,Hist1h2ak,Hist1h2an,Hist1h2ap,Hist1h2bb,Hist1h2bc,Hist1h2be,Hist1h2bf,Hist1h2bg,Hist1h2bh,Hist1h2bl,Hist1h2bm,Hist1h2bn,Hist1h2bp,Hist1h3a,Hist1h3b,Hist1h3c,Hist1h3d,Hist1h3e,Hist1h3f,Hist1h3g,Hist1h3h,Hist1h…	Cenpv,H2afx,Hist1h1a,Hist1h1b,Hist1h1c,Hist1h1d,Hist1h1e,Hist1h1t,Hist1h2ab,Hist1h2ac,Hist1h2ae,Hist1h2af,Hist1h2ag,Hist1h2ah,Hist1h2ai,Hist1h2ak,Hist1h2an,Hist1h2ap,Hist1h2bb,Hist1h2bc,Hist1h2be,Hist1h2bf,Hist1h2bg,Hist1h2bh,Hist1h2bj,Hist1h2bk,Hist1h2bl,Hist1h2bm,Hist1h2bn,Hist1h2bp,Hist1h3a,Hist1h3b,Hist1h3c,Hist1h3d,Hist1h3e,Hist1h3f,Hist1h3g,Hist1h3h,Hist1h3i,Hist1h4a,Hist1h4b,Hist1h4c,Hist1…	1700012L04Rik,1700054O13Rik,Cdca5,Cenpv,Chaf1a,Chaf1b,Ctcf,Dffb,Gm5132,H3f3a,Hhex,Hist1h1a,Hist1h1b,Hist1h1c,Hist1h1d,Hist1h1e,Hist1h1t,Hist1h2ab,Hist1h2ac,Hist1h2ae,Hist1h2af,Hist1h2ai,Hist1h2ak,Hist1h2an,Hist1h2ap,Hist1h2bb,Hist1h2bc,Hist1h2be,Hist1h2bf,Hist1h2bg,Hist1h2bh,Hist1h2bl,Hist1h2bm,Hist1h2bn,Hist1h2bp,Hist1h3a,Hist1h3b,Hist1h3c,Hist1h3d,Hist1h3e,Hist1h3f,Hist1h3g,Hist1h3h,Hist1h3i,Hi…	NA	NA	Bahd1,Cdk1,Cenpv,Dffb,H2afb1,H3f3a,Hist1h1a,Hist1h1b,Hist1h1c,Hist1h1d,Hist1h1e,Hist1h1t,Hist1h2ab,Hist1h2ac,Hist1h2ae,Hist1h2af,Hist1h2ag,Hist1h2ah,Hist1h2ai,Hist1h2ak,Hist1h2an,Hist1h2ap,Hist1h2bb,Hist1h2bc,Hist1h2be,Hist1h2bf,Hist1h2bg,Hist1h2bh,Hist1h2bj,Hist1h2bk,Hist1h2bl,Hist1h2bm,Hist1h2bn,Hist1h2bp,Hist1h3a,Hist1h3b,Hist1h3c,Hist1h3d,Hist1h3e,Hist1h3f,Hist1h3g,Hist1h3h,Hist1h3i,Hist1h4a,…	Cenpv,H2afx,H3f3a,H3f3b,Hist1h1a,Hist1h1b,Hist1h1c,Hist1h1d,Hist1h1e,Hist1h1t,Hist1h2ab,Hist1h2ac,Hist1h2ae,Hist1h2af,Hist1h2ag,Hist1h2ah,Hist1h2ai,Hist1h2ak,Hist1h2an,Hist1h2ap,Hist1h2bb,Hist1h2bc,Hist1h2be,Hist1h2bf,Hist1h2bg,Hist1h2bh,Hist1h2bj,Hist1h2bk,Hist1h2bl,Hist1h2bm,Hist1h2bn,Hist1h2bp,Hist1h3a,Hist1h3b,Hist1h3c,Hist1h3d,Hist1h3e,Hist1h3f,Hist1h3g,Hist1h3h,Hist1h3i,Hist1h4a,Hist1h4b,Hi…	NA	1700012L04Rik,Bahd1,Cdca5,Hist1h1a,Hist1h1c,Hist1h1d,Hist1h1e,Hist1h1t,Hist1h2ab,Hist1h2ac,Hist1h2ae,Hist1h2af,Hist1h2bb,Hist1h2bc,Hist1h2be,Hist1h2bf,Hist1h2bg,Hist1h2bh,Hist1h3a,Hist1h3b,Hist1h3c,Hist1h3d,Hist1h3e,Hist1h3f,Hist1h3g,Hist1h4a,Hist1h4b,Hist1h4c,Hist1h4d,Hist1h4f,Hist1h4h,Rad51,Smc2,Top1mt,Tspyl3	NA	1700012L04Rik,Acin1,Bahd1,Cenpv,Chaf1b,Ctcf,H2afx,H3f3a,Hhex,Hist1h1a,Hist1h1c,Hist1h1d,Hist1h1e,Hist1h1t,Hist1h2ab,Hist1h2ac,Hist1h2ae,Hist1h2af,Hist1h2bb,Hist1h2bc,Hist1h2be,Hist1h2bf,Hist1h2bg,Hist1h2bh,Hist1h3a,Hist1h3b,Hist1h3c,Hist1h3d,Hist1h3e,Hist1h3f,Hist1h3g,Hist1h4a,Hist1h4b,Hist1h4c,Hist1h4d,Hist1h4f,Hist1h4h,Hist2h2ab,Hist2h2ac,Hist2h2bb,Hist2h2be,Hist2h3b,Hist2h3c1,Hist2h4,Hist3h2a,…	NA
GO Biological Process	DNA metabolic process	0	0	0				0		0		0		1500010J02Rik,2310003H01Rik,5930416I19Rik,6030422M02Rik,A630055G03Rik,Acd,Acin1,Actl6a,Akap8,Apaf1,Atrx,Bard1,Brca2,Casp3,Ccdc111,Ccdc88a,Cdc6,Cdk1,Cdt1,Cep164,Chaf1a,Chaf1b,Chek1,Chrna4,Cry2,Ctcf,Ctcfl,Dffb,Dnase1,Dnase1l2,Dnase2b,Dnmt3a,Dntt,Dtl,E4f1,Eme2,Ercc1,Exosc3,Exosc6,Eya3,Fam175a,Fan1,Fanci,Fshr,Gins2,Gins4,Gtf2h3,Gtf2h4,Gtf2h5,H1fx,H2afb1,H2afj,H2afx,H2afy,H3f3a,Hhex,Hist1h1a,Hist1h1b,…	Actl6a,Apaf1,Apobec2,Apobec3,Cenpv,Ctcfl,Dmc1,Dnase1,Eme2,Eya3,Fzr1,H2afx,Hist1h1a,Hist1h1b,Hist1h1c,Hist1h1d,Hist1h1e,Hist1h1t,Hist1h2ab,Hist1h2ac,Hist1h2ae,Hist1h2af,Hist1h2ag,Hist1h2ah,Hist1h2ai,Hist1h2ak,Hist1h2an,Hist1h2ap,Hist1h2bb,Hist1h2bc,Hist1h2be,Hist1h2bf,Hist1h2bg,Hist1h2bh,Hist1h2bj,Hist1h2bk,Hist1h2bl,Hist1h2bm,Hist1h2bn,Hist1h2bp,Hist1h3a,Hist1h3b,Hist1h3c,Hist1h3d,Hist1h3e,Hist1h…	1110054O05Rik,1700012L04Rik,1700054O13Rik,2310003H01Rik,A730011L01Rik,Acd,Actr5,Aplf,Apobec3,Atrx,Brcc3,Bre,Casp3,Ccdc111,Ccdc88a,Ccno,Cd40lg,Cdc6,Cdca5,Cdk7,Cdt1,Cenpv,Cep164,Chaf1a,Chaf1b,Cidea,Cry2,Ctcf,Cul4b,Dffb,Dnase1,Dnase1l3,Dnase2b,Eme2,Eya3,Fancg,Fanci,Fen1,Gins3,Glrb,Gm5132,H3f3a,Hhex,Hist1h1a,Hist1h1b,Hist1h1c,Hist1h1d,Hist1h1e,Hist1h1t,Hist1h2ab,Hist1h2ac,Hist1h2ae,Hist1h2af,Hist1h2a…	NA	NA	NA	Aicda,Apobec2,Cdt1,Cenpv,Ctcfl,Eef1e1,Eme2,Eya3,H2afx,H3f3a,H3f3b,Hist1h1a,Hist1h1b,Hist1h1c,Hist1h1d,Hist1h1e,Hist1h1t,Hist1h2ab,Hist1h2ac,Hist1h2ae,Hist1h2af,Hist1h2ag,Hist1h2ah,Hist1h2ai,Hist1h2ak,Hist1h2an,Hist1h2ap,Hist1h2bb,Hist1h2bc,Hist1h2be,Hist1h2bf,Hist1h2bg,Hist1h2bh,Hist1h2bj,Hist1h2bk,Hist1h2bl,Hist1h2bm,Hist1h2bn,Hist1h2bp,Hist1h3a,Hist1h3b,Hist1h3c,Hist1h3d,Hist1h3e,Hist1h3f,Hist1…	NA	1700012L04Rik,2310035K24Rik,Apobec3,Bahd1,Cdc6,Cdca5,Cdk7,Cdt1,Cep164,Cidea,Ctcfl,Cul4a,Dnase2a,Eme2,Eya3,Fen1,Gins4,Hist1h1a,Hist1h1c,Hist1h1d,Hist1h1e,Hist1h1t,Hist1h2ab,Hist1h2ac,Hist1h2ae,Hist1h2af,Hist1h2bb,Hist1h2bc,Hist1h2be,Hist1h2bf,Hist1h2bg,Hist1h2bh,Hist1h3a,Hist1h3b,Hist1h3c,Hist1h3d,Hist1h3e,Hist1h3f,Hist1h3g,Hist1h4a,Hist1h4b,Hist1h4c,Hist1h4d,Hist1h4f,Hist1h4h,Mapk8ip3,Mdc1,Mki67,…	NA	1500010J02Rik,1700012L04Rik,2210018M11Rik,2310003H01Rik,2310035K24Rik,A630055G03Rik,Acd,Acin1,Actl6a,Actr5,Alkbh2,Aplf,Apobec2,Atf7ip,Atm,Atrx,Bahd1,Baz1b,Blm,Brcc3,Casp3,Ccdc111,Ccne1,Cd40lg,Cdc6,Cdk7,Cdt1,Cenpv,Cep164,Chaf1b,Chek2,Cidea,Cinp,Cry2,Ctcf,Cul4b,Ddb1,Dmc1,Dnase1l2,Dnase1l3,Dnase2b,Dtl,E4f1,Ercc1,Eya3,Fancg,Fanci,Fzr1,Gins2,Gins3,Gtf2h1,Gtf2h2,H2afx,H3f3a,Hhex,Hist1h1a,Hist1h1c,Hist1…	NA
GO Biological Process	DNA packaging	0	0	0			1.08429e-292	0		5.16217e-149		0		Acin1,Akap8,Cdk1,Chaf1a,Chaf1b,Ctcf,Dffb,Fshr,H1fx,H2afb1,H2afj,H2afx,H2afy,H3f3a,Hist1h1a,Hist1h1b,Hist1h1c,Hist1h1d,Hist1h1e,Hist1h1t,Hist1h2ab,Hist1h2ac,Hist1h2ae,Hist1h2af,Hist1h2ai,Hist1h2ak,Hist1h2an,Hist1h2ap,Hist1h2bb,Hist1h2bc,Hist1h2be,Hist1h2bf,Hist1h2bg,Hist1h2bh,Hist1h2bl,Hist1h2bm,Hist1h2bn,Hist1h2bp,Hist1h3a,Hist1h3b,Hist1h3c,Hist1h3d,Hist1h3e,Hist1h3f,Hist1h3g,Hist1h3h,Hist1h3i,Hi…	Cenpv,H2afx,Hist1h1a,Hist1h1b,Hist1h1c,Hist1h1d,Hist1h1e,Hist1h1t,Hist1h2ab,Hist1h2ac,Hist1h2ae,Hist1h2af,Hist1h2ag,Hist1h2ah,Hist1h2ai,Hist1h2ak,Hist1h2an,Hist1h2ap,Hist1h2bb,Hist1h2bc,Hist1h2be,Hist1h2bf,Hist1h2bg,Hist1h2bh,Hist1h2bj,Hist1h2bk,Hist1h2bl,Hist1h2bm,Hist1h2bn,Hist1h2bp,Hist1h3a,Hist1h3b,Hist1h3c,Hist1h3d,Hist1h3e,Hist1h3f,Hist1h3g,Hist1h3h,Hist1h3i,Hist1h4a,Hist1h4b,Hist1h4c,Hist1…	1700012L04Rik,1700054O13Rik,Cdca5,Cenpv,Chaf1a,Chaf1b,Ctcf,Dffb,Gm5132,H3f3a,Hist1h1a,Hist1h1b,Hist1h1c,Hist1h1d,Hist1h1e,Hist1h1t,Hist1h2ab,Hist1h2ac,Hist1h2ae,Hist1h2af,Hist1h2ai,Hist1h2ak,Hist1h2an,Hist1h2ap,Hist1h2bb,Hist1h2bc,Hist1h2be,Hist1h2bf,Hist1h2bg,Hist1h2bh,Hist1h2bl,Hist1h2bm,Hist1h2bn,Hist1h2bp,Hist1h3a,Hist1h3b,Hist1h3c,Hist1h3d,Hist1h3e,Hist1h3f,Hist1h3g,Hist1h3h,Hist1h3i,Hist1h4…	NA	NA	Bahd1,Cdk1,Cenpv,Dffb,H2afb1,H3f3a,Hist1h1a,Hist1h1b,Hist1h1c,Hist1h1d,Hist1h1e,Hist1h1t,Hist1h2ab,Hist1h2ac,Hist1h2ae,Hist1h2af,Hist1h2ag,Hist1h2ah,Hist1h2ai,Hist1h2ak,Hist1h2an,Hist1h2ap,Hist1h2bb,Hist1h2bc,Hist1h2be,Hist1h2bf,Hist1h2bg,Hist1h2bh,Hist1h2bj,Hist1h2bk,Hist1h2bl,Hist1h2bm,Hist1h2bn,Hist1h2bp,Hist1h3a,Hist1h3b,Hist1h3c,Hist1h3d,Hist1h3e,Hist1h3f,Hist1h3g,Hist1h3h,Hist1h3i,Hist1h4a,…	Cenpv,H2afx,H3f3a,H3f3b,Hist1h1a,Hist1h1b,Hist1h1c,Hist1h1d,Hist1h1e,Hist1h1t,Hist1h2ab,Hist1h2ac,Hist1h2ae,Hist1h2af,Hist1h2ag,Hist1h2ah,Hist1h2ai,Hist1h2ak,Hist1h2an,Hist1h2ap,Hist1h2bb,Hist1h2bc,Hist1h2be,Hist1h2bf,Hist1h2bg,Hist1h2bh,Hist1h2bj,Hist1h2bk,Hist1h2bl,Hist1h2bm,Hist1h2bn,Hist1h2bp,Hist1h3a,Hist1h3b,Hist1h3c,Hist1h3d,Hist1h3e,Hist1h3f,Hist1h3g,Hist1h3h,Hist1h3i,Hist1h4a,Hist1h4b,Hi…	NA	1700012L04Rik,Bahd1,Cdca5,Hist1h1a,Hist1h1c,Hist1h1d,Hist1h1e,Hist1h1t,Hist1h2ab,Hist1h2ac,Hist1h2ae,Hist1h2af,Hist1h2bb,Hist1h2bc,Hist1h2be,Hist1h2bf,Hist1h2bg,Hist1h2bh,Hist1h3a,Hist1h3b,Hist1h3c,Hist1h3d,Hist1h3e,Hist1h3f,Hist1h3g,Hist1h4a,Hist1h4b,Hist1h4c,Hist1h4d,Hist1h4f,Hist1h4h,Smc2,Tspyl3	NA	1700012L04Rik,Acin1,Bahd1,Cenpv,Chaf1b,Ctcf,H2afx,H3f3a,Hist1h1a,Hist1h1c,Hist1h1d,Hist1h1e,Hist1h1t,Hist1h2ab,Hist1h2ac,Hist1h2ae,Hist1h2af,Hist1h2bb,Hist1h2bc,Hist1h2be,Hist1h2bf,Hist1h2bg,Hist1h2bh,Hist1h3a,Hist1h3b,Hist1h3c,Hist1h3d,Hist1h3e,Hist1h3f,Hist1h3g,Hist1h4a,Hist1h4b,Hist1h4c,Hist1h4d,Hist1h4f,Hist1h4h,Hist2h2ab,Hist2h2ac,Hist2h2bb,Hist2h2be,Hist2h3b,Hist2h3c1,Hist2h4,Hist3h2a,Hist3…	NA
GO Biological Process	hemopoiesis	0		0				2.07964e-85				0		Acin1,Ada,Adam17,Apc,Atp7a,B2m,Bak1,Bax,Bcl11a,Bcl3,Bpgm,Brca2,Cbfa2t3,Ccr1,Ccr2,Ccr7,Cd24a,Cd28,Cd300lf,Cd3d,Cd3e,Cd74,Cd79a,Cdkn2b,Cebpa,Cebpe,Chuk,Ciapin1,Clcf1,Csf1,Csf1r,Ctnnb1,Cxcl15,Dock2,Dyrk3,Egr1,Ercc1,Fech,Fgfr2,Flt3,Fstl3,Fut7,Gimap1,Gimap5,Glrx5,H2-Ab1,Hdac5,Hhex,Hif1a,Ifnz,Ikzf1,Irf1,Irf8,Itpkb,Jag2,Kdm1a,Kit,Klf2,Ldb1,Lilrb3,Lyl1,Lyn,Mb,Meis1,Men1,Mfap2,Mink1,Mll1,Mll5,Msh2,Myh9,Nf…	NA	Ada,Add1,Add2,Alas2,Angpt1,Atp7a,B2m,Bcl11a,Bpgm,Cbfa2t3,Ccr1,Ccr2,Ccr7,Cd24a,Cd300lf,Cd40lg,Cdk13,Cited2,Ctnnb1,Dyrk3,Ebp,Egr1,Epb4.2,F2rl1,Fech,Flt3,Foxp3,Fzd7,Gab2,Gata1,Gata3,Glrx5,Gpc3,Gpr183,Hhex,Ikzf1,Irf1,Itpkb,Kdr,Kit,Klf2,Ldb1,Malt1,Mb,Mink1,Mll5,Myh9,Ncor1,Nhej1,Nkx2-5,Picalm,Pik3r1,Plcb1,Plscr1,Pml,Psen2,Rabgap1l,Rag1,Rcor1,Rhoh,Rpl22,Runx1,Sfpi1,Slc11a2,Sp1,Sp3,Spn,Stap1,Stat5b,Stk3,…	NA	NA	NA	Cbfa2t3,Cd24a,Cd79a,Cdk13,Cited2,Csf1r,Gata2,Jmjd6,Jun,Med1,Ncor1,Pbx1,Pik3r1,Rhoh,Rpl22,Rps19,Slc37a4,Tfrc,Tgfbr3,Vegfa	NA	NA	NA	Acin1,Ada,Add1,Add2,Alas2,Angpt1,Atm,Atp7a,B2m,Bak1,Bax,Blm,Bpgm,Cbfa2t3,Ccr1,Ccr2,Ccr7,Cd24a,Cd40lg,Cebpe,Cited2,Csf1,Csf3,Cxcl15,Ebp,Egr1,Ercc1,Fech,Flt3,Fut7,Fzd5,Gab2,Gata1,Gata2,Glrx5,Gpc3,Gpr183,H2-Ab1,Hba-x,Hhex,Ifnz,Ikzf1,Il17c,Il7r,Irf8,Itk,Kdm1a,Klf2,Lrrc8a,Meis1,Men1,Mfap2,Mink1,Myh9,Ncor1,Nhej1,Nkx2-5,Pbx1,Pdgfb,Picalm,Pik3r1,Plcg2,Plek,Plscr1,Pml,Prdx3,Psen1,Psen2,Rabgap1l,Rcor1,Relb…	NA
GO Biological Process	immune effector process	0		0										Ace,Ada,Atp7a,BC096441,Bcl10,Bcl3,C1ra,C1rb,C1rl,C1s,C2,C4b,C4bp,C8g,Card9,Cd207,Cd300a,Cd74,Cfb,Cplx2,Cr1l,Cx3cr1,Dbh,Ercc1,Exosc3,Exosc6,Fadd,Fcer1g,Fcgr1,Fcgr2b,Fcgr3,Fcnb,Fut7,Gcnt3,Gm885,Gpam,H2-Ab1,H2-Q9,Hc,Hspd1,Icam1,Ifnar1,Il6,Inpp5d,Lat,Lat2,Lilrb3,Lyn,Masp2,Mbl2,Mll5,Mpo,Msh2,Myd88,Myo1f,Plscr1,Prdx1,Prf1,Prkcd,Prkce,Psen1,Ptpn6,Relb,Rsad2,Sbno2,Serping1,Slc11a1,Stxbp2,Swap70,Tac4,Tlr7…	NA	Ace,Ada,Adora3,Atp7a,BC096441,Bcl10,Bnip3l,Bst2,C2,C3,C4b,Card9,Cd40lg,Cd47,Cd55,Cfb,Cr1l,Ctsg,Cxcl9,Daf2,F2rl1,Fcgr2b,Fcgr3,Fcnb,Foxp3,Gata3,Gcnt3,Gpam,Gpr183,Gzmb,Hc,Hspd1,Icam1,Ifnar1,Il4,Inpp5d,Lat,Lat2,Mll5,Mpo,Nbn,Plscr1,Psen2,Ptpn6,Samhd1,Ticam1,Tlr7,Tlr8,Trp53,Zp3	NA	NA	NA	NA	NA	NA	NA	NA	NA
GO Biological Process	immune response	0												2010002M12Rik,Ada,Adam17,Adamts13,Apoa4,Atp7a,Axl,B2m,BC096441,Bcl10,Bcl3,C1ra,C1rb,C1rl,C1s,C2,C4b,C4bp,C8g,Ccl1,Ccl11,Ccl2,Ccl3,Ccl5,Ccl6,Ccl7,Ccl9,Ccr2,Ccr5,Ccr7,Cd24a,Cd28,Cd300a,Cd74,Cfb,Chid1,Clec4d,Clec4e,Clec4n,Clec5a,Clec7a,Cnpy3,Cplx2,Cr1l,Cx3cr1,Cxcl1,Cxcl14,Cxcl15,Cxcl16,Cxcl2,Cxcl3,Cxcl5,Cyp27b1,Defb1,Ercc1,Exosc3,Exosc6,Fadd,Fasl,Fcamr,Fcer1g,Fcgr1,Fcgr2b,Fcgr3,Fcgrt,Fcnb,Fgr,Fut7,G…	NA	NA	NA	NA	NA	NA	NA	NA	NA	NA	NA
GO Biological Process	immune system process	0		0					3.51914e-244			0		2010002M12Rik,Ace,Acin1,Ada,Adam10,Adam17,Adam9,Adamts13,Akt1,Ap3d1,Apc,Apoa4,Atp7a,Axl,B2m,B4galt1,BC096441,Bak1,Bax,Bcl10,Bcl11a,Bcl3,Bpgm,Brca2,C1ra,C1rb,C1rl,C1s,C2,C4b,C4bp,C8g,Calca,Calr,Card9,Casp3,Cbfa2t3,Ccl1,Ccl11,Ccl2,Ccl25,Ccl3,Ccl5,Ccl6,Ccl7,Ccl9,Ccr1,Ccr2,Ccr3,Ccr4,Ccr5,Ccr7,Cd19,Cd207,Cd247,Cd24a,Cd28,Cd300a,Cd300lf,Cd34,Cd38,Cd3d,Cd3e,Cd48,Cd74,Cd79a,Cd80,Cdkn2b,Cebpa,Cebpe,Cfb,Cf…	NA	2010002M12Rik,Ace,Ada,Adam10,Adam9,Add1,Add2,Adora3,Aimp1,Alas2,Angpt1,Atp7a,Axl,B2m,B4galt1,BC096441,Bank1,Bcl10,Bcl11a,Bnip3l,Bpgm,Bst2,C2,C3,C4b,C6,Card9,Casp3,Cbfa2t3,Ccr1,Ccr2,Ccr3,Ccr5,Ccr7,Cd19,Cd247,Cd24a,Cd276,Cd300lf,Cd38,Cd40lg,Cd47,Cd55,Cd80,Cdk13,Cfb,Cfc1,Chst3,Cited1,Cited2,Cklf,Clec4d,Clec4e,Clec4n,Cnpy3,Cr1l,Ctla4,Ctnnb1,Ctsg,Cxcl9,Cybb,Daf2,Defb1,Dpp4,Dyrk3,Ebp,Egr1,Enpp3,Epb4.2,…	NA	NA	NA	NA	Akt1,Angpt1,Bcl11a,Ccl3,Ccl5,Ccl6,Ccl9,Cd276,Cd48,Cdkn2b,Chst3,Clec7a,Cnn2,Csf3r,Ddost,Flt3,Gimap1,Gimap5,H2-D1,H2-Gs10,H2-Q1,H2-Q10,H2-Q2,H2-Q8,H2-Q9,Hsh2d,Ikzf1,Il12a,Itpkb,Klf2,Klhl6,Klre1,Lst1,Lta,Ltb,Lyn,Msh6,Myh9,Ncf1,Ndrg1,Nfkbia,Nos2,P2ry14,Pdgfb,Pik3r1,Plcg2,Rab27a,Slamf1,Smad6,Sp3,Stat1,Tlr7,Tlr8,Tnf,Zbp1,Zfp36l1,Zfp36l2	NA	NA	2010002M12Rik,Ace,Acin1,Ada,Adam9,Add1,Add2,Adora3,Akt1,Alas2,Angpt1,Apoa4,Atm,Atp7a,Axl,B2m,B4galt1,BC096441,Bak1,Bax,Bcar1,Bcl10,Bcl2l11,Blm,Bmpr1a,Bpgm,Bst2,C3ar1,C5ar1,C8g,Calr,Casp1,Casp3,Cbfa2t3,Ccl17,Ccl22,Ccr1,Ccr2,Ccr3,Ccr5,Ccr7,Cd19,Cd247,Cd24a,Cd276,Cd40lg,Cd47,Cd55,Cebpe,Chid1,Chst3,Cited2,Clec2i,Clec4d,Clec4e,Clec4n,Cnpy3,Csf1,Csf3,Csf3r,Ctsg,Cx3cl1,Cx3cr1,Cxcl1,Cxcl15,Cxcl2,Cxcl3,Cx…	NA
GO Biological Process	leukocyte activation	0							3.22652e-109					Ada,Adam10,Adam17,Adam9,Apc,Atp7a,B2m,Bak1,Bax,Bcl10,Bcl11a,Bcl3,Ccl5,Ccr7,Cd24a,Cd28,Cd300a,Cd3d,Cd3e,Cd48,Cd74,Cd79a,Chrna4,Clcf1,Cplx2,Crip3,Ctnnb1,Cx3cr1,Cxcr2,Cxcr4,Ddost,Dock2,Egr1,Ercc1,Exosc3,Exosc6,Fcer1g,Fcgr3,Fkbp1a,Fkbp1b,Flt3,Fut7,Gimap1,Gimap5,Gm885,H2-Ab1,Hdac5,Hhex,Hsh2d,Hspd1,Icam1,Ifnar1,Ifnz,Ikzf1,Il6,Impdh1,Impdh2,Irf1,Itgam,Itgav,Itpkb,Jag2,Klre1,Lat,Lat2,Lilrb3,Lyl1,Lyn,Mink…	NA	NA	NA	NA	NA	NA	Bcl11a,Ccl5,Cd276,Cd48,Ddost,Flt3,Gimap1,Gimap5,Hsh2d,Ikzf1,Itpkb,Klre1,Lyn,Msh6,Myh9,Ndrg1,Pik3r1,Plcg2,Rab27a,Slamf1,Sp3,Tlr7,Zfp36l1,Zfp36l2	NA	NA	NA	NA
GO Biological Process	macromolecular complex assembly	0	0	0			0	0		0		0		1110034A24Rik,2410091C18Rik,Acadl,Acadm,Acot13,Adipoq,Aldh1a1,Ang,Angptl4,Apc,Apoa1,Apoa2,Apoa4,Apoe,Apom,Aqp11,Atl2,Aurkb,Bat1a,Bax,Bcl10,Calr,Ccdc88c,Ccl5,Cd3d,Cd74,Cdk1,Cirbp,Clp1,Col23a1,Cox10,Cox15,Cox18,Cpt1a,Crnkl1,Crtc1,Cryaa,Cubn,Cuta,Dctpp1,Dgat1,Dgkd,Diap1,Diap2,Ehd1,Ehd4,Eif2a,Eif3a,Eif3d,Elp2,Enah,Eral1,Fbp1,Fech,Fkbp4,Gas7,Gch1,Gfpt1,Ggn,Gnmt,Gpx3,Grb2,Gtf2a2,H1fx,H2-Ke2,H2afb1,H2af…	Bat1a,Ccdc40,Cenpv,Cirbp,Gas7,H2afx,Hist1h1a,Hist1h1b,Hist1h1c,Hist1h1d,Hist1h1e,Hist1h1t,Hist1h2ab,Hist1h2ac,Hist1h2ae,Hist1h2af,Hist1h2ag,Hist1h2ah,Hist1h2ai,Hist1h2ak,Hist1h2an,Hist1h2ap,Hist1h2bb,Hist1h2bc,Hist1h2be,Hist1h2bf,Hist1h2bg,Hist1h2bh,Hist1h2bj,Hist1h2bk,Hist1h2bl,Hist1h2bm,Hist1h2bn,Hist1h2bp,Hist1h3a,Hist1h3b,Hist1h3c,Hist1h3d,Hist1h3e,Hist1h3f,Hist1h3g,Hist1h3h,Hist1h3i,Hist1h4a…	1700012L04Rik,1700054O13Rik,Abca1,Acadm,Angpt1,Anxa5,Aqp11,Arl6,Bcl10,Bicd1,Ccdc40,Ccnb1,Cenpv,Cirbp,Cog4,Cpt1a,Crtc1,Crtc3,Cubn,Cuta,Diap1,Diap2,Eif2a,Eif2ak3,Enah,Eps15,Eral1,Fech,Fga,Fgb,Fgg,Gfpt1,Glrb,Gm5132,Gmnn,Gnmt,Grb2,Gtf2a2,H2-Ke2,H3f3a,Hist1h1a,Hist1h1b,Hist1h1c,Hist1h1d,Hist1h1e,Hist1h1t,Hist1h2ab,Hist1h2ac,Hist1h2ae,Hist1h2af,Hist1h2ai,Hist1h2ak,Hist1h2an,Hist1h2ap,Hist1h2bb,Hist1h2b…	NA	NA	Acacb,Acat1,Ang,Angpt1,Apom,Atpaf2,Cav2,Ccdc109a,Ccnb1,Cd3d,Cdk1,Celf4,Cenpv,Cubn,Cyba,Dctpp1,Dicer1,Ehd4,Enah,Fermt3,Fkbp4,Gch1,Gja1,Gpx3,Grb2,Grb7,Gtf2a2,H2afb1,H3f3a,Hip1,Hist1h1a,Hist1h1b,Hist1h1c,Hist1h1d,Hist1h1e,Hist1h1t,Hist1h2ab,Hist1h2ac,Hist1h2ae,Hist1h2af,Hist1h2ag,Hist1h2ah,Hist1h2ai,Hist1h2ak,Hist1h2an,Hist1h2ap,Hist1h2bb,Hist1h2bc,Hist1h2be,Hist1h2bf,Hist1h2bg,Hist1h2bh,Hist1h2bj,H…	Acot13,Acvrl1,Cat,Cenpv,Cirbp,H2afx,H3f3a,H3f3b,Hist1h1a,Hist1h1b,Hist1h1c,Hist1h1d,Hist1h1e,Hist1h1t,Hist1h2ab,Hist1h2ac,Hist1h2ae,Hist1h2af,Hist1h2ag,Hist1h2ah,Hist1h2ai,Hist1h2ak,Hist1h2an,Hist1h2ap,Hist1h2bb,Hist1h2bc,Hist1h2be,Hist1h2bf,Hist1h2bg,Hist1h2bh,Hist1h2bj,Hist1h2bk,Hist1h2bl,Hist1h2bm,Hist1h2bn,Hist1h2bp,Hist1h3a,Hist1h3b,Hist1h3c,Hist1h3d,Hist1h3e,Hist1h3f,Hist1h3g,Hist1h3h,Hist1…	NA	1700012L04Rik,Ang,Apom,Bcl10,Ccnb1,Clp1,Crtc3,Ehd1,Eif3d,Eral1,Fech,Gch1,Gchfr,Hes5,Hist1h1a,Hist1h1c,Hist1h1d,Hist1h1e,Hist1h1t,Hist1h2ab,Hist1h2ac,Hist1h2ae,Hist1h2af,Hist1h2bb,Hist1h2bc,Hist1h2be,Hist1h2bf,Hist1h2bg,Hist1h2bh,Hist1h3a,Hist1h3b,Hist1h3c,Hist1h3d,Hist1h3e,Hist1h3f,Hist1h3g,Hist1h4a,Hist1h4b,Hist1h4c,Hist1h4d,Hist1h4f,Hist1h4h,Hr,Igf1r,Lonp1,Max,Mdm2,Mtss1,Ndufs5,P2rx3,Prkaa1,Prk…	NA	1700012L04Rik,Abca1,Acaca,Acacb,Alad,Aldob,Amfr,Angpt1,Angptl4,Apoa1,Apoa4,Apoe,Aqp11,Aurkb,Bax,Bcl10,Bid,Blm,Calr,Ccdc40,Ccdc88c,Ccnb1,Cenpv,Chrna3,Clp1,Cpsf7,Cpt1a,Crnkl1,Crtc1,Crtc3,Cubn,Cuta,Cyba,Dctpp1,Dgat1,Dhps,Diap1,Dicer1,Ehd1,Eif2ak3,Eif3d,Eral1,Fech,Fermt3,Gch1,Gchfr,Gfpt1,Ggn,Gnmt,Grb2,Grb7,Gtf2a2,H2afx,H3f3a,Hes5,Hist1h1a,Hist1h1c,Hist1h1d,Hist1h1e,Hist1h1t,Hist1h2ab,Hist1h2ac,Hist1h…	NA
GO Biological Process	macromolecular complex subunit organization	0	0	0			0	0		0		0		1110034A24Rik,2410091C18Rik,2810006K23Rik,Acadl,Acadm,Acot13,Adipoq,Aldh1a1,Ang,Angptl4,Apc,Apoa1,Apoa2,Apoa4,Apoa5,Apoc1,Apoc3,Apoe,Apom,Aqp11,Atl2,Aurkb,Bat1a,Bax,Bcl10,Calr,Ccdc88c,Ccl5,Cd3d,Cd74,Cdk1,Cirbp,Clp1,Col23a1,Cox10,Cox15,Cox18,Cpt1a,Crnkl1,Crtc1,Cryaa,Ctcf,Cubn,Cuta,Dctpp1,Dgat1,Dgkd,Diap1,Diap2,Ehd1,Ehd4,Eif2a,Eif3a,Eif3d,Elp2,Enah,Eral1,Etf1,Fbp1,Fech,Fkbp4,Fshr,Gas7,Gch1,Gfpt1,Gg…	Abcg1,Bat1a,Ccdc40,Cenpv,Cirbp,Ddit4,Gas7,H2afx,Hist1h1a,Hist1h1b,Hist1h1c,Hist1h1d,Hist1h1e,Hist1h1t,Hist1h2ab,Hist1h2ac,Hist1h2ae,Hist1h2af,Hist1h2ag,Hist1h2ah,Hist1h2ai,Hist1h2ak,Hist1h2an,Hist1h2ap,Hist1h2bb,Hist1h2bc,Hist1h2be,Hist1h2bf,Hist1h2bg,Hist1h2bh,Hist1h2bj,Hist1h2bk,Hist1h2bl,Hist1h2bm,Hist1h2bn,Hist1h2bp,Hist1h3a,Hist1h3b,Hist1h3c,Hist1h3d,Hist1h3e,Hist1h3f,Hist1h3g,Hist1h3h,Hist1…	1700012L04Rik,1700054O13Rik,2810006K23Rik,Abca1,Acadm,Angpt1,Anxa5,Aqp11,Aqp2,Arl6,Bcl10,Bicd1,Ccdc40,Ccnb1,Cenph,Cenpv,Cirbp,Cog4,Cpt1a,Crtc1,Crtc3,Ctcf,Cubn,Cuta,Ddit4,Diap1,Diap2,Eif2a,Eif2ak3,Enah,Eps15,Eral1,Fech,Fga,Fgb,Fgg,Gfpt1,Ghrl,Glrb,Gm5132,Gmnn,Gnmt,Grb2,Gtf2a2,H2-Ke2,H3f3a,Hist1h1a,Hist1h1b,Hist1h1c,Hist1h1d,Hist1h1e,Hist1h1t,Hist1h2ab,Hist1h2ac,Hist1h2ae,Hist1h2af,Hist1h2ai,Hist1h2…	NA	NA	Acacb,Acat1,Ang,Angpt1,Apom,Atpaf2,Cav2,Ccdc109a,Ccnb1,Cd3d,Cdk1,Celf4,Cenph,Cenpv,Cubn,Cyba,Dctpp1,Dicer1,Ehd4,Enah,Fermt3,Fkbp4,Gch1,Ghrl,Gja1,Gpx3,Grb2,Grb7,Gtf2a2,H2afb1,H3f3a,Hip1,Hist1h1a,Hist1h1b,Hist1h1c,Hist1h1d,Hist1h1e,Hist1h1t,Hist1h2ab,Hist1h2ac,Hist1h2ae,Hist1h2af,Hist1h2ag,Hist1h2ah,Hist1h2ai,Hist1h2ak,Hist1h2an,Hist1h2ap,Hist1h2bb,Hist1h2bc,Hist1h2be,Hist1h2bf,Hist1h2bg,Hist1h2bh,…	Abcg1,Acot13,Acvrl1,Cat,Cenpv,Cirbp,Ddit4,H2afx,H3f3a,H3f3b,Hist1h1a,Hist1h1b,Hist1h1c,Hist1h1d,Hist1h1e,Hist1h1t,Hist1h2ab,Hist1h2ac,Hist1h2ae,Hist1h2af,Hist1h2ag,Hist1h2ah,Hist1h2ai,Hist1h2ak,Hist1h2an,Hist1h2ap,Hist1h2bb,Hist1h2bc,Hist1h2be,Hist1h2bf,Hist1h2bg,Hist1h2bh,Hist1h2bj,Hist1h2bk,Hist1h2bl,Hist1h2bm,Hist1h2bn,Hist1h2bp,Hist1h3a,Hist1h3b,Hist1h3c,Hist1h3d,Hist1h3e,Hist1h3f,Hist1h3g,Hi…	NA	1700012L04Rik,Ang,Apom,Bcl10,Ccnb1,Cenph,Clp1,Crtc3,Ehd1,Eif3d,Eral1,Fech,Gch1,Gchfr,Hes5,Hist1h1a,Hist1h1c,Hist1h1d,Hist1h1e,Hist1h1t,Hist1h2ab,Hist1h2ac,Hist1h2ae,Hist1h2af,Hist1h2bb,Hist1h2bc,Hist1h2be,Hist1h2bf,Hist1h2bg,Hist1h2bh,Hist1h3a,Hist1h3b,Hist1h3c,Hist1h3d,Hist1h3e,Hist1h3f,Hist1h3g,Hist1h4a,Hist1h4b,Hist1h4c,Hist1h4d,Hist1h4f,Hist1h4h,Hr,Igf1r,Lipc,Lonp1,Max,Mdm2,Mtss1,Ndufs5,P2rx3…	NA	1700012L04Rik,2810006K23Rik,Abca1,Abcg1,Acaca,Acacb,Alad,Aldob,Amfr,Angpt1,Angptl4,Apoa1,Apoa4,Apoa5,Apoc1,Apoc3,Apoe,Aqp11,Aurkb,Bax,Baz1b,Bcl10,Bid,Blm,Calr,Ccdc40,Ccdc88c,Ccnb1,Cenph,Cenpv,Chrna3,Clp1,Cpsf7,Cpt1a,Crnkl1,Crtc1,Crtc3,Ctcf,Cubn,Cuta,Cyba,Dctpp1,Ddit4,Dgat1,Dhps,Diap1,Dicer1,Ehd1,Eif2ak3,Eif3d,Eral1,Etf1,Fech,Fermt3,Gch1,Gchfr,Gfpt1,Ggn,Ghrl,Gnmt,Grb2,Grb7,Gtf2a2,H2afx,H3f3a,Hes5,…	NA
GO Biological Process	macromolecule metabolic process	0	0	0	0			0				0		0610031J06Rik,1110008L16Rik,1110034A24Rik,1190005F20Rik,1500002O20Rik,1500010J02Rik,1600027N09Rik,1810009J06Rik,1810024B03Rik,2010111I01Rik,2210010C04Rik,2310003H01Rik,2310079F23Rik,2410022L05Rik,2510012J08Rik,2810006K23Rik,2810422J05Rik,3110056O03Rik,4930486L24Rik,4932415M13Rik,5930416I19Rik,6030422M02Rik,A630055G03Rik,A830007P12Rik,AF366264,Aars,Aars2,Aatk,Abcf1,Abi1,Abt1,Acadm,Acan,Acd,Ace,Aci…	1110008L16Rik,1810009J06Rik,2210010C04Rik,9530002B09Rik,Abcg1,Abi1,Abtb1,Ace,Actl6a,Acvr1b,Adam15,Adam33,Adat1,Akt1,Amz2,Anapc11,Apaf1,Apobec2,Apobec3,Atf3,Bach1,Bat1a,Batf3,Birc2,Birc3,Bmp7,Bop1,Camk2b,Capn9,Capns1,Casz1,Cbx4,Cbx7,Ccnc,Cela1,Cenpv,Chst11,Chst5,Cirbp,Clip3,Cltc,Cnot2,Col5a1,Creb3l1,Creb3l3,Ctcfl,Ctdsp1,Ctsl,Dapk1,Dcp1b,Ddx39,Ddx5,Denr,Dhx8,Dis3,Dmc1,Dmrtb1,Dnajb1,Dnajc8,Dnase1,Do…	1110008L16Rik,1110018G07Rik,1110054O05Rik,1190005F20Rik,1700012L04Rik,1700054O13Rik,1810009J06Rik,1810024B03Rik,2210010C04Rik,2210012G02Rik,2310003H01Rik,2700078E11Rik,2810006K23Rik,A730011L01Rik,Aak1,Abca1,Abhd5,Abi1,Acadm,Acd,Ace,Actr5,Adad2,Adam10,Adam2,Adam21,Adam4,Adam9,Adamts1,Adamts5,Adck1,Add1,Adora1,Adprh,Adrb1,Adrbk2,Aff1,Aff3,Afg3l2,Agl,Agtpbp1,Aimp1,Aip,Alas2,Alg6,Alkbh8,Alpk2,Als2,Al…	1110008L16Rik,1110034A24Rik,1190005F20Rik,1500002O20Rik,1500010J02Rik,2210012G02Rik,2310003H01Rik,2810422J05Rik,3110056O03Rik,Aak1,Abi1,Acaca,Acd,Actl6a,Adad2,Adam17,Adam9,Adamts10,Adat1,Adrbk2,Afg3l1,Afg3l2,Alpk2,Amhr2,Anapc11,Anapc2,Aph1a,Aplf,Art1,Art5,Ascc2,Asphd2,Asprv1,Atg4d,Atoh8,Atxn7l3,Aurkb,Axl,B3gnt2,B3gnt7,B4galt1,BC051070,Bach2,Bap1,Bcl11a,Bcl3,Bclaf1,Bgn,Bhlha15,Bmp2k,Bop1,Bptf,Brf1…	NA	NA	2500003M10Rik,Abcg1,Acvrl1,Aicda,Aimp1,Apobec2,Banp,Bclaf1,Bmp7,Btg1,Cars2,Cat,Cbfa2t3,Ccnl1,Cdk12,Cdk13,Cdt1,Cenpv,Cirbp,Cited2,Cltc,Cops4,Creb3l3,Csf1r,Ctcfl,Ctu2,Dapk1,Ddit3,Ddx39,Ddx5,Dnajb1,Dnajc8,Dusp1,Dusp5,Ebf4,Eef1a1,Eef1e1,Eif4a1,Eme2,Epha10,Eprs,Erbb3,Ern1,Eya3,Gata2,Gli1,Gmeb1,Gtf2f1,H2afx,H3f3a,H3f3b,Hars,Hars2,Hes2,Hes3,Hipk4,Hist1h1a,Hist1h1b,Hist1h1c,Hist1h1d,Hist1h1e,Hist1h1t,His…	NA	NA	NA	0610031J06Rik,1110008L16Rik,1110018G07Rik,1500002O20Rik,1500010J02Rik,1700012L04Rik,2210018M11Rik,2310003H01Rik,2310035K24Rik,2810006K23Rik,2810422J05Rik,3110056O03Rik,A630055G03Rik,A930038C07Rik,AF366264,Aak1,Abca1,Abcf1,Abcg1,Abhd5,Abtb1,Acaca,Acd,Ace,Acin1,Acp1,Acr,Actl6a,Actl6b,Actr5,Acy1,Adad2,Adam19,Adam2,Adam9,Adamts5,Adat1,Adck1,Add1,Adrb1,Adrbk2,Aes,Aff1,Aff3,Afg3l1,Afg3l2,Aimp2,Aip,Akna…	NA
GO Biological Process	metabolic process	0	0	0	0			0		0		0		0610031J06Rik,1110008L16Rik,1110034A24Rik,1190003J15Rik,1190005F20Rik,1500002O20Rik,1500010J02Rik,1600015I10Rik,1600027N09Rik,1810009J06Rik,1810014F10Rik,1810024B03Rik,2010111I01Rik,2210010C04Rik,2310003H01Rik,2310079F23Rik,2410022L05Rik,2510012J08Rik,2810006K23Rik,2810422J05Rik,3110056O03Rik,4930402F06Rik,4930486L24Rik,4932415M13Rik,4933406M09Rik,5133401N09Rik,5730469M10Rik,5930416I19Rik,6030422…	1110008L16Rik,1110018J18Rik,1190003J15Rik,1700019G17Rik,1700061G19Rik,1810009J06Rik,2210010C04Rik,5430411K18Rik,9530002B09Rik,A3galt2,AI314976,Abca7,Abcb10,Abcb9,Abcc1,Abcg1,Abhd8,Abi1,Abtb1,Acap1,Accs,Accsl,Ace,Acsbg2,Acss2,Actl6a,Acvr1b,Adam15,Adam33,Adat1,Adssl1,Afmid,Agt,Ak3,Akt1,Alas1,Alkbh4,Alox12b,Alox8,Amd2,Amz2,Anapc11,Apaf1,Apobec2,Apobec3,Aqp1,Arsg,Asns,Atf3,Atp13a1,Atp1a2,Atp1b1,Atp5d…	1110008L16Rik,1110018G07Rik,1110020G09Rik,1110054O05Rik,1190003J15Rik,1190005F20Rik,1300010F03Rik,1700012L04Rik,1700021K19Rik,1700054O13Rik,1700061G19Rik,1810009J06Rik,1810014F10Rik,1810024B03Rik,2210010C04Rik,2210012G02Rik,2310003H01Rik,2700078E11Rik,2810006K23Rik,4930402F06Rik,5033411D12Rik,5430411K18Rik,5730469M10Rik,9630033F20Rik,A3galt2,A730011L01Rik,AB099516,Aadac,Aadacl2,Aak1,Abca1,Abca3,A…	1110008L16Rik,1110020G09Rik,1110034A24Rik,1190005F20Rik,1500002O20Rik,1500010J02Rik,2210012G02Rik,2310003H01Rik,2810405K02Rik,2810422J05Rik,3110056O03Rik,4933406M09Rik,5730469M10Rik,A230051G13Rik,Aak1,Abat,Abcb6,Abcb9,Abcc1,Abcc3,Abcc5,Abi1,Acaa1a,Acaca,Acd,Acsf3,Actl6a,Ada,Adad2,Adam17,Adam9,Adamts10,Adat1,Adc,Adck5,Adipor1,Adrbk2,Afg3l1,Afg3l2,Agps,Ahcy,Ahcyl2,Ak2,Alad,Alpi,Alpk2,Alppl2,Amhr2,A…	NA	NA	1110005A03Rik,2500003M10Rik,5033411D12Rik,A3galt2,A530098C11Rik,AI314976,Aadac,Aadacl2,Abcg1,Acsf3,Acvrl1,Agxt2l2,Aicda,Aimp1,Apobec2,Aprt,Arl4a,Atp5d,Banp,Bclaf1,Blvrb,Bmp7,Btg1,C130079G13Rik,Cacna1a,Car5a,Cars2,Cat,Cbfa2t3,Ccnl1,Cd24a,Cdk12,Cdk13,Cdt1,Cenpv,Cirbp,Cited2,Cltc,Cops4,Creb3l3,Csf1r,Ctcfl,Ctu2,Cyb5r3,Dapk1,Ddah2,Ddit3,Ddit4,Ddx39,Ddx5,Diras1,Dnajb1,Dnajc8,Dusp1,Dusp5,Ebf4,Eef1a1,Eef…	NA	0610007P22Rik,1110008L16Rik,1500002O20Rik,1700012L04Rik,2210012G02Rik,2310035K24Rik,2810405K02Rik,4921509C19Rik,5730469M10Rik,Aadac,Aadacl2,Abcb6,Abcb9,Abcg2,Abcg4,Abt1,Acap1,Acer3,Acmsd,Acp5,Acsf3,Acss1,Adprhl1,Afg3l2,Agl,Agpat4,Aifm3,Ak7,Alas2,Aldh9a1,Alpk1,Ampd3,Amz2,Ang,Apeh,Apobec3,Apom,Aprt,Arl2,Arsg,Arx,Asprv1,Atg14,Atg9a,Atoh8,Atp1b2,Atp5s,Atp8b1,Aurka,B2m,B4galt1,Bahd1,Bap1,Bcl11a,Birc2,…	NA	0610031J06Rik,1110008L16Rik,1110018G07Rik,1110018J18Rik,1500002O20Rik,1500010J02Rik,1700012L04Rik,1700061G19Rik,2210018M11Rik,2310003H01Rik,2310035K24Rik,2810006K23Rik,2810405K02Rik,2810422J05Rik,3110056O03Rik,4832428D23Rik,4930402F06Rik,4933406M09Rik,5430411K18Rik,5730469M10Rik,6430598A04Rik,A230051G13Rik,A630055G03Rik,A930038C07Rik,AB099516,AF366264,AI314976,Aacs,Aadac,Aadacl2,Aak1,Abca1,Abca2,…	NA
GO Biological Process	mRNA metabolic process	0						1.7588e-103						1500002O20Rik,2510012J08Rik,Bat1a,Ccdc55,Cdc5l,Cirbp,Clasrp,Clp1,Crnkl1,Csdc2,Dcp1b,Dcp2,Dcps,Ddx39,Ddx5,Dgcr14,Dhx15,Dhx8,Dhx9,Eftud2,Eif2c2,Eif2c3,Elavl1,Etf1,Exosc3,Ftsjd2,Gemin5,Gemin7,Gm672,Gspt1,Hnrnpa1,Hnrnpa2b1,Hnrnpa3,Hnrnpc,Hnrnpl,Hspa1a,Hspa1b,Igf2bp1,Isy1,Lgals3,Lsm1,Lsm4,Lsm7,Magoh,Magohb,Mapkapk2,Matk,Mov10,Myd88,Nanos2,Nhp2l1,Nol3,Pan3,Parn,Pcbp1,Pnn,Pnrc2,Ppie,Ppih,Ppil3,Ppp1r8,Pr…	NA	NA	NA	NA	NA	Aicda,Apobec2,Cdk12,Cdk13,Cirbp,Ddx39,Ddx5,Ern1,Hnrnpa2b1,Hspa1a,Hspa1b,Jmjd6,Khsrp,Ptbp1,Rbm38,Sf3a1,Sfpq,Srrm1,Srsf2,Syf2,Txnl4a,Vegfa	NA	NA	NA	NA	NA
GO Biological Process	multi-organism process	0		0			0					0		2010002M12Rik,Abat,Ace,Adam17,Adh5,B2m,Baiap2,Bak1,Bat1a,Bcl10,Bcl3,Becn1,Bsg,Calca,Card9,Carm1,Cbs,Ccl2,Ccl5,Ccr1,Ccr5,Ccr7,Cd207,Cd24a,Cd38,Cebpb,Cebpe,Clec4n,Clec5a,Clec7a,Cmpk2,Cnr2,Comt,Cotl1,Cr1l,Cx3cr1,Cxcl15,Cxcl2,Cyp11a1,Cyp17a1,Cyp27b1,Dag1,Dbh,Defa-rs7,Defa17,Defa20,Defa21,Defa22,Defa25,Defa26,Defa3,Defa5,Defa6,Defb1,Defb10,Defb11,Defb12,Defb13,Defb14,Defb15,Defb19,Defb2,Defb25,Defb3,D…	NA	2010002M12Rik,Abca1,Abcg2,Ace,Acsl4,Akr1c18,Apobec3,Aqp2,Atp4b,B2m,Bcl10,Becn1,Bnip3l,Bst2,Card9,Ccr1,Ccr5,Ccr7,Cd24a,Cd38,Cd47,Cebpb,Cited1,Cited2,Cldn4,Clec4n,Cnr2,Comt,Cr1l,Ctsg,Cxcl9,Dag1,Defa-rs7,Defa17,Defa20,Defa21,Defa22,Defa25,Defa26,Defa3,Defa5,Defa6,Defb1,Defb10,Defb11,Defb12,Defb13,Defb14,Defb15,Defb2,Defb3,Defb34,Defb35,Defb37,Defb38,Defb39,Defb4,Defb40,Defb5,Defb50,Defb6,Defb7,Defb8…	NA	NA	Abat,Abcc5,Alb,Aldh2,Alpl,Apobec3,App,Bst2,Camp,Carm1,Cd14,Cd24a,Ceacam1,Ceacam2,Cebpb,Clec4n,Clec5a,Cnr2,Comt,Cotl1,Cyp11a1,Defa-rs7,Defa17,Defa20,Defa21,Defa22,Defa25,Defa26,Defa3,Defa5,Defa6,Defb1,Defb10,Defb11,Defb12,Defb13,Defb14,Defb15,Defb2,Defb3,Defb34,Defb35,Defb37,Defb38,Defb39,Defb4,Defb40,Defb5,Defb50,Defb6,Defb7,Defb8,Defb9,Dicer1,Duox2,Dusp10,Epha3,Ets1,F2r,Fkbp4,Fmo1,Gbp9,Gch1,Ghrl…	NA	NA	NA	NA	2010002M12Rik,Abca1,Abcc5,Abcg2,Ace,Acp5,Acsl4,Adm,Aqp1,Ar,B2m,Bak1,Bcl10,Bcl2l11,Becn1,Bsg,Bst2,C5ar1,Casp1,Cbs,Ccr1,Ccr5,Ccr7,Cd24a,Cd47,Cebpb,Cebpe,Cited2,Cldn4,Clec4n,Cmpk2,Cnr2,Comt,Ctsg,Ctsl,Cx3cr1,Cxcl15,Cxcl2,Dag1,Defa-rs7,Defa17,Defa20,Defa21,Defa22,Defa25,Defa26,Defa3,Defa5,Defa6,Defb1,Defb10,Defb11,Defb12,Defb13,Defb14,Defb15,Defb2,Defb3,Defb34,Defb35,Defb37,Defb38,Defb39,Defb4,Defb40,…	NA
GO Biological Process	nitrogen compound metabolic process	0	0	0	0			0		0		0		0610031J06Rik,1110008L16Rik,1190003J15Rik,1190005F20Rik,1500002O20Rik,1500010J02Rik,1600015I10Rik,1600027N09Rik,2310003H01Rik,2310079F23Rik,2410022L05Rik,2510012J08Rik,5930416I19Rik,6030422M02Rik,A230051G13Rik,A630055G03Rik,Aars,Aars2,Abat,Abca2,Abcb4,Abcb6,Abcb9,Abcc1,Abcc3,Abcc6,Abce1,Abcf1,Abp1,Abt1,Acadl,Acadm,Accs,Accsl,Acd,Acer3,Acin1,Actl6a,Acy1,Ada,Adc,Adcy10,Adcy2,Adssl1,Aes,Aff1,Aff3,Af…	1110008L16Rik,1190003J15Rik,AI314976,Abca7,Abcb10,Abcb9,Abcc1,Abcg1,Accs,Accsl,Actl6a,Adat1,Adssl1,Afmid,Ak3,Alas1,Amd2,Apaf1,Apobec2,Apobec3,Aqp1,Asns,Atf3,Atp13a1,Atp1a2,Atp1b1,Atp5d,Atp6v1g2,Bach1,Bat1a,Batf3,Blvra,Bop1,Cacna1a,Casz1,Cbx4,Cbx7,Ccbl1,Ccnc,Cenpv,Chst11,Chst5,Cirbp,Cnot2,Creb3l1,Creb3l3,Ctcfl,Dcp1b,Ddx39,Ddx5,Dhx8,Diras1,Diras2,Dis3,Dmc1,Dmrtb1,Dnase1,Dohh,Dpf2,Eef1a1,Eif2c2,Eif4…	1110008L16Rik,1110054O05Rik,1190003J15Rik,1190005F20Rik,1300010F03Rik,1700012L04Rik,1700054O13Rik,2210012G02Rik,2310003H01Rik,A730011L01Rik,Abca1,Abca3,Abca4,Abcb6,Abcc1,Abcc4,Abcc6,Abce1,Abcg2,Acadm,Acd,Acer3,Actr5,Ada,Adad2,Adc,Adcy4,Aff1,Aff3,Agap3,Ak2,Ak7,Alas2,Aldh18a1,Aldh1l1,Aldh4a1,Aldh6a1,Alkbh8,Alx3,Alx4,Amt,Angpt1,Anp32a,Aoc2,Aoc3,Aplf,Apobec3,Aprt,Arid3a,Arid4b,Arid5a,Arl2,Arl4a,Arntl…	1110008L16Rik,1190005F20Rik,1500002O20Rik,1500010J02Rik,2210012G02Rik,2310003H01Rik,A230051G13Rik,Abat,Abcb6,Abcb9,Abcc1,Abcc3,Abcc5,Acd,Actl6a,Ada,Adad2,Adat1,Adc,Ak2,Alad,Ampd3,Aplf,Aprt,Arl2,Ascc2,Aspdh,Atoh8,Atp13a1,Atp1b2,Atp2c2,Atp4b,Atp5b,Atp5c1,Atp5j2,Atp5k,Atp5s,Atp6v1a,Atxn7l3,BC016495,BC051070,Bach2,Bcl11a,Bcl3,Bclaf1,Bgn,Bhlha15,Blvrb,Bop1,Bptf,Brf1,Brf2,Bzw2,Cacnb4,Casc3,Cbfa2t3,Cdc4…	NA	NA	2500003M10Rik,AI314976,Abcg1,Aicda,Apobec2,Aprt,Arl4a,Atp5d,Banp,Bclaf1,Blvrb,Cacna1a,Cars2,Cbfa2t3,Ccnl1,Cdk12,Cdk13,Cdt1,Cenpv,Cirbp,Cited2,Creb3l3,Ctcfl,Ctu2,Ddah2,Ddit3,Ddx39,Ddx5,Diras1,Ebf4,Eef1a1,Eef1e1,Eme2,Eprs,Ern1,Eya3,Ftcd,Gata2,Gli1,Gm266,Gmeb1,Gtf2f1,H2afx,H3f3a,H3f3b,Hars,Hars2,Hes2,Hes3,Hist1h1a,Hist1h1b,Hist1h1c,Hist1h1d,Hist1h1e,Hist1h1t,Hist1h2ab,Hist1h2ac,Hist1h2ae,Hist1h2af,H…	NA	0610007P22Rik,1110008L16Rik,1500002O20Rik,1700012L04Rik,2210012G02Rik,2310035K24Rik,Abcb6,Abcb9,Abcg2,Abcg4,Abt1,Acer3,Ak7,Alas2,Aldh9a1,Ampd3,Ang,Apobec3,Aprt,Arl2,Arx,Atoh8,Atp1b2,Atp5s,Bahd1,Bcl11a,Blvrb,Brd7,Carhsp1,Carm1,Cbfa2t3,Cbx7,Cdc6,Cdca5,Cdk7,Cdt1,Cep164,Cidea,Cited4,Clp1,Comt,Cpox,Creb3l3,Crtc3,Csda,Csrnp1,Cstf1,Ctcfl,Ctps2,Ctu2,Cul4a,Dcps,Dimt1,Diras1,Dnahc1,Dnahc2,Dnase2a,Dnttip2,D…	NA	0610031J06Rik,1110008L16Rik,1500002O20Rik,1500010J02Rik,1700012L04Rik,2210018M11Rik,2310003H01Rik,2310035K24Rik,A230051G13Rik,A630055G03Rik,A930038C07Rik,AI314976,Abca1,Abca2,Abca4,Abcb10,Abcb4,Abcb6,Abcb9,Abcc1,Abcc4,Abcc5,Abcc6,Abcc9,Abcf1,Abcg1,Abcg2,Acd,Acin1,Actl6a,Actl6b,Actr5,Acy1,Ada,Adad2,Adat1,Adc,Adcy10,Adcy4,Adcy6,Adcy9,Adssl1,Aes,Aff1,Aff3,Afmid,Agmat,Ak2,Ak7,Ak8,Akna,Alad,Alas2,Aldh…	NA
GO Biological Process	nucleobase-containing compound metabolic process	0	0	0	0			0				0		0610031J06Rik,1110008L16Rik,1190003J15Rik,1190005F20Rik,1500002O20Rik,1500010J02Rik,1600027N09Rik,2310003H01Rik,2310079F23Rik,2410022L05Rik,2510012J08Rik,5930416I19Rik,6030422M02Rik,A630055G03Rik,Aars,Aars2,Abca2,Abcb4,Abcb6,Abcb9,Abcc1,Abcc3,Abcc6,Abce1,Abcf1,Abt1,Acd,Acin1,Actl6a,Ada,Adcy10,Adcy2,Adssl1,Aes,Aff1,Aff3,Ak2,Ak3,Ak4,Ak8,Akap8,Akna,Alx4,Ang,Apaf1,Aprt,Arf6,Arid1a,Arid3a,Arid5a,Arl3,…	1110008L16Rik,1190003J15Rik,AI314976,Abca7,Abcb10,Abcb9,Abcc1,Abcg1,Actl6a,Adat1,Adssl1,Ak3,Apaf1,Apobec2,Apobec3,Aqp1,Atf3,Atp13a1,Atp1a2,Atp1b1,Atp5d,Atp6v1g2,Bach1,Bat1a,Batf3,Bop1,Casz1,Cbx4,Cbx7,Ccnc,Cenpv,Cirbp,Cnot2,Creb3l1,Creb3l3,Ctcfl,Dcp1b,Ddx39,Ddx5,Dhx8,Diras1,Diras2,Dis3,Dmc1,Dmrtb1,Dnase1,Dpf2,Eef1a1,Eif2c2,Eif4a3,Eme2,Ets1,Eya3,Fars2,Fignl1,Fli1,Fos,Fzr1,Gatad2a,Gemin7,Glis1,Gna12…	1110008L16Rik,1110054O05Rik,1190003J15Rik,1190005F20Rik,1300010F03Rik,1700012L04Rik,1700054O13Rik,2210012G02Rik,2310003H01Rik,A730011L01Rik,Abca1,Abca3,Abca4,Abcb6,Abcc1,Abcc4,Abcc6,Abce1,Abcg2,Acd,Actr5,Ada,Adad2,Adcy4,Aff1,Aff3,Agap3,Ak2,Ak7,Aldh6a1,Alkbh8,Alx3,Alx4,Anp32a,Aplf,Apobec3,Aprt,Arid3a,Arid4b,Arid5a,Arl2,Arl4a,Arntl,Arx,Asxl1,Atoh8,Atp13a3,Atp1b2,Atp2b1,Atp2b2,Atp2b3,Atp4b,Atp5d,Atp…	1110008L16Rik,1190005F20Rik,1500002O20Rik,1500010J02Rik,2210012G02Rik,2310003H01Rik,Abcb6,Abcb9,Abcc1,Abcc3,Abcc5,Acd,Actl6a,Ada,Adad2,Adat1,Ak2,Ampd3,Aplf,Aprt,Arl2,Ascc2,Aspdh,Atoh8,Atp13a1,Atp1b2,Atp2c2,Atp4b,Atp5b,Atp5c1,Atp5j2,Atp5k,Atp5s,Atp6v1a,Atxn7l3,BC016495,Bach2,Bcl11a,Bcl3,Bclaf1,Bhlha15,Bop1,Bptf,Brf1,Brf2,Bzw2,Cacnb4,Casc3,Cbfa2t3,Cdc40,Cdca5,Cdt1,Cebpb,Cggbp1,Chrna4,Cidea,Cnot2,Cp…	NA	NA	2500003M10Rik,AI314976,Abcg1,Aicda,Apobec2,Aprt,Arl4a,Atp5d,Banp,Bclaf1,Cars2,Cbfa2t3,Ccnl1,Cdk12,Cdk13,Cdt1,Cenpv,Cirbp,Cited2,Creb3l3,Ctcfl,Ctu2,Ddit3,Ddx39,Ddx5,Diras1,Ebf4,Eef1a1,Eef1e1,Eme2,Eprs,Ern1,Eya3,Gata2,Gli1,Gm266,Gmeb1,Gtf2f1,H2afx,H3f3a,H3f3b,Hars,Hars2,Hes2,Hes3,Hist1h1a,Hist1h1b,Hist1h1c,Hist1h1d,Hist1h1e,Hist1h1t,Hist1h2ab,Hist1h2ac,Hist1h2ae,Hist1h2af,Hist1h2ag,Hist1h2ah,Hist1h…	NA	NA	NA	0610031J06Rik,1110008L16Rik,1500002O20Rik,1500010J02Rik,1700012L04Rik,2210018M11Rik,2310003H01Rik,2310035K24Rik,A630055G03Rik,AI314976,Abca1,Abca2,Abca4,Abcb10,Abcb4,Abcb6,Abcb9,Abcc1,Abcc4,Abcc5,Abcc6,Abcc9,Abcf1,Abcg1,Abcg2,Acd,Acin1,Actl6a,Actl6b,Actr5,Ada,Adad2,Adat1,Adcy10,Adcy4,Adcy6,Adcy9,Adssl1,Aes,Aff1,Aff3,Ak2,Ak7,Ak8,Akna,Aldob,Alkbh2,Alkbh8,Anp32a,Aplf,Apobec2,Aprt,Aqp1,Ar,Arf6,Arid4b…	NA
GO Biological Process	nucleosome assembly	0	0				3.00495e-219	0		4.06528e-134		0		H1fx,H2afb1,H2afj,H2afx,H2afy,H3f3a,Hist1h1a,Hist1h1b,Hist1h1c,Hist1h1d,Hist1h1e,Hist1h1t,Hist1h2ab,Hist1h2ac,Hist1h2ae,Hist1h2af,Hist1h2ai,Hist1h2ak,Hist1h2an,Hist1h2ap,Hist1h2bb,Hist1h2bc,Hist1h2be,Hist1h2bf,Hist1h2bg,Hist1h2bh,Hist1h2bl,Hist1h2bm,Hist1h2bn,Hist1h2bp,Hist1h3a,Hist1h3b,Hist1h3c,Hist1h3d,Hist1h3e,Hist1h3f,Hist1h3g,Hist1h3h,Hist1h3i,Hist1h4a,Hist1h4b,Hist1h4c,Hist1h4d,Hist1h4f,His…	H2afx,Hist1h1a,Hist1h1b,Hist1h1c,Hist1h1d,Hist1h1e,Hist1h1t,Hist1h2ab,Hist1h2ac,Hist1h2ae,Hist1h2af,Hist1h2ag,Hist1h2ah,Hist1h2ai,Hist1h2ak,Hist1h2an,Hist1h2ap,Hist1h2bb,Hist1h2bc,Hist1h2be,Hist1h2bf,Hist1h2bg,Hist1h2bh,Hist1h2bj,Hist1h2bk,Hist1h2bl,Hist1h2bm,Hist1h2bn,Hist1h2bp,Hist1h3a,Hist1h3b,Hist1h3c,Hist1h3d,Hist1h3e,Hist1h3f,Hist1h3g,Hist1h3h,Hist1h3i,Hist1h4a,Hist1h4b,Hist1h4c,Hist1h4d,Hi…	NA	NA	NA	H2afb1,H3f3a,Hist1h1a,Hist1h1b,Hist1h1c,Hist1h1d,Hist1h1e,Hist1h1t,Hist1h2ab,Hist1h2ac,Hist1h2ae,Hist1h2af,Hist1h2ag,Hist1h2ah,Hist1h2ai,Hist1h2ak,Hist1h2an,Hist1h2ap,Hist1h2bb,Hist1h2bc,Hist1h2be,Hist1h2bf,Hist1h2bg,Hist1h2bh,Hist1h2bj,Hist1h2bk,Hist1h2bl,Hist1h2bm,Hist1h2bn,Hist1h2bp,Hist1h3a,Hist1h3b,Hist1h3c,Hist1h3d,Hist1h3e,Hist1h3f,Hist1h3g,Hist1h3h,Hist1h3i,Hist1h4a,Hist1h4b,Hist1h4c,Hist…	H2afx,H3f3a,H3f3b,Hist1h1a,Hist1h1b,Hist1h1c,Hist1h1d,Hist1h1e,Hist1h1t,Hist1h2ab,Hist1h2ac,Hist1h2ae,Hist1h2af,Hist1h2ag,Hist1h2ah,Hist1h2ai,Hist1h2ak,Hist1h2an,Hist1h2ap,Hist1h2bb,Hist1h2bc,Hist1h2be,Hist1h2bf,Hist1h2bg,Hist1h2bh,Hist1h2bj,Hist1h2bk,Hist1h2bl,Hist1h2bm,Hist1h2bn,Hist1h2bp,Hist1h3a,Hist1h3b,Hist1h3c,Hist1h3d,Hist1h3e,Hist1h3f,Hist1h3g,Hist1h3h,Hist1h3i,Hist1h4a,Hist1h4b,Hist1h4c…	NA	1700012L04Rik,Hist1h1a,Hist1h1c,Hist1h1d,Hist1h1e,Hist1h1t,Hist1h2ab,Hist1h2ac,Hist1h2ae,Hist1h2af,Hist1h2bb,Hist1h2bc,Hist1h2be,Hist1h2bf,Hist1h2bg,Hist1h2bh,Hist1h3a,Hist1h3b,Hist1h3c,Hist1h3d,Hist1h3e,Hist1h3f,Hist1h3g,Hist1h4a,Hist1h4b,Hist1h4c,Hist1h4d,Hist1h4f,Hist1h4h,Tspyl3	NA	1700012L04Rik,H2afx,H3f3a,Hist1h1a,Hist1h1c,Hist1h1d,Hist1h1e,Hist1h1t,Hist1h2ab,Hist1h2ac,Hist1h2ae,Hist1h2af,Hist1h2bb,Hist1h2bc,Hist1h2be,Hist1h2bf,Hist1h2bg,Hist1h2bh,Hist1h3a,Hist1h3b,Hist1h3c,Hist1h3d,Hist1h3e,Hist1h3f,Hist1h3g,Hist1h4a,Hist1h4b,Hist1h4c,Hist1h4d,Hist1h4f,Hist1h4h,Hist2h2ab,Hist2h2ac,Hist2h2bb,Hist2h2be,Hist2h3b,Hist2h3c1,Hist2h4,Hist3h2a,Hist3h2ba,Hist3h2bb-ps,Mcm2,Rsf1,Sm…	NA
GO Biological Process	nucleosome organization	0	0				5.82408e-223	0		2.45715e-138		0		Ctcf,Fshr,H1fx,H2afb1,H2afj,H2afx,H2afy,H3f3a,Hist1h1a,Hist1h1b,Hist1h1c,Hist1h1d,Hist1h1e,Hist1h1t,Hist1h2ab,Hist1h2ac,Hist1h2ae,Hist1h2af,Hist1h2ai,Hist1h2ak,Hist1h2an,Hist1h2ap,Hist1h2bb,Hist1h2bc,Hist1h2be,Hist1h2bf,Hist1h2bg,Hist1h2bh,Hist1h2bl,Hist1h2bm,Hist1h2bn,Hist1h2bp,Hist1h3a,Hist1h3b,Hist1h3c,Hist1h3d,Hist1h3e,Hist1h3f,Hist1h3g,Hist1h3h,Hist1h3i,Hist1h4a,Hist1h4b,Hist1h4c,Hist1h4d,Hi…	H2afx,Hist1h1a,Hist1h1b,Hist1h1c,Hist1h1d,Hist1h1e,Hist1h1t,Hist1h2ab,Hist1h2ac,Hist1h2ae,Hist1h2af,Hist1h2ag,Hist1h2ah,Hist1h2ai,Hist1h2ak,Hist1h2an,Hist1h2ap,Hist1h2bb,Hist1h2bc,Hist1h2be,Hist1h2bf,Hist1h2bg,Hist1h2bh,Hist1h2bj,Hist1h2bk,Hist1h2bl,Hist1h2bm,Hist1h2bn,Hist1h2bp,Hist1h3a,Hist1h3b,Hist1h3c,Hist1h3d,Hist1h3e,Hist1h3f,Hist1h3g,Hist1h3h,Hist1h3i,Hist1h4a,Hist1h4b,Hist1h4c,Hist1h4d,Hi…	NA	NA	NA	H2afb1,H3f3a,Hist1h1a,Hist1h1b,Hist1h1c,Hist1h1d,Hist1h1e,Hist1h1t,Hist1h2ab,Hist1h2ac,Hist1h2ae,Hist1h2af,Hist1h2ag,Hist1h2ah,Hist1h2ai,Hist1h2ak,Hist1h2an,Hist1h2ap,Hist1h2bb,Hist1h2bc,Hist1h2be,Hist1h2bf,Hist1h2bg,Hist1h2bh,Hist1h2bj,Hist1h2bk,Hist1h2bl,Hist1h2bm,Hist1h2bn,Hist1h2bp,Hist1h3a,Hist1h3b,Hist1h3c,Hist1h3d,Hist1h3e,Hist1h3f,Hist1h3g,Hist1h3h,Hist1h3i,Hist1h4a,Hist1h4b,Hist1h4c,Hist…	H2afx,H3f3a,H3f3b,Hist1h1a,Hist1h1b,Hist1h1c,Hist1h1d,Hist1h1e,Hist1h1t,Hist1h2ab,Hist1h2ac,Hist1h2ae,Hist1h2af,Hist1h2ag,Hist1h2ah,Hist1h2ai,Hist1h2ak,Hist1h2an,Hist1h2ap,Hist1h2bb,Hist1h2bc,Hist1h2be,Hist1h2bf,Hist1h2bg,Hist1h2bh,Hist1h2bj,Hist1h2bk,Hist1h2bl,Hist1h2bm,Hist1h2bn,Hist1h2bp,Hist1h3a,Hist1h3b,Hist1h3c,Hist1h3d,Hist1h3e,Hist1h3f,Hist1h3g,Hist1h3h,Hist1h3i,Hist1h4a,Hist1h4b,Hist1h4c…	NA	1700012L04Rik,Hist1h1a,Hist1h1c,Hist1h1d,Hist1h1e,Hist1h1t,Hist1h2ab,Hist1h2ac,Hist1h2ae,Hist1h2af,Hist1h2bb,Hist1h2bc,Hist1h2be,Hist1h2bf,Hist1h2bg,Hist1h2bh,Hist1h3a,Hist1h3b,Hist1h3c,Hist1h3d,Hist1h3e,Hist1h3f,Hist1h3g,Hist1h4a,Hist1h4b,Hist1h4c,Hist1h4d,Hist1h4f,Hist1h4h,Tnp1,Tspyl3	NA	1700012L04Rik,Baz1b,Ctcf,H2afx,H3f3a,Hist1h1a,Hist1h1c,Hist1h1d,Hist1h1e,Hist1h1t,Hist1h2ab,Hist1h2ac,Hist1h2ae,Hist1h2af,Hist1h2bb,Hist1h2bc,Hist1h2be,Hist1h2bf,Hist1h2bg,Hist1h2bh,Hist1h3a,Hist1h3b,Hist1h3c,Hist1h3d,Hist1h3e,Hist1h3f,Hist1h3g,Hist1h4a,Hist1h4b,Hist1h4c,Hist1h4d,Hist1h4f,Hist1h4h,Hist2h2ab,Hist2h2ac,Hist2h2bb,Hist2h2be,Hist2h3b,Hist2h3c1,Hist2h4,Hist3h2a,Hist3h2ba,Hist3h2bb-ps,M…	NA
GO Biological Process	organelle organization	0	0	0				0		0		0		0610037P05Rik,1500010J02Rik,1600027N09Rik,2410022L05Rik,2410091C18Rik,Ablim3,Acd,Acin1,Acot8,Actg1,Actl6a,Actn4,Agfg1,Aif1,Akap8,Akt1,Als2,Anapc10,Anapc11,Anapc13,Anapc4,Anapc5,Ang,Anln,Antxr1,Apc,Aqp11,Arf6,Arhgap10,Arhgef18,Arid1a,Arl8a,Arl8b,Arpp19,Atg9a,Atl2,Atp2a1,Atp2b2,Atp6v0c,Atp7a,Atxn7l3,Aurkb,Bak1,Bap1,Bax,Baz1a,Bbs1,Becn1,Bet1,Bfsp2,Birc5,Bloc1s3,Blzf1,Bnip1,Brca2,Brd1,Brpf3,Brsk1,Cac…	0610037P05Rik,6720463M24Rik,Acta1,Actl6a,Add2,Aif1,Akt1,Anapc11,Aqp1,Bbc3,Bcar1,Birc5,Cbx4,Cbx7,Cenpv,Chchd3,Cltc,Cnn2,Cntrob,Cog2,Ctcfl,Daam1,Epb4.1l1,Espn,Eya3,Fam83d,Fzr1,Gaa,Gas7,Get4,H2afx,Haus8,Hist1h1a,Hist1h1b,Hist1h1c,Hist1h1d,Hist1h1e,Hist1h1t,Hist1h2ab,Hist1h2ac,Hist1h2ae,Hist1h2af,Hist1h2ag,Hist1h2ah,Hist1h2ai,Hist1h2ak,Hist1h2an,Hist1h2ap,Hist1h2bb,Hist1h2bc,Hist1h2be,Hist1h2bf,Hist1…	0610037P05Rik,1700012L04Rik,1700054O13Rik,2810021B07Rik,4933400A11Rik,Abca1,Acd,Actg1,Add2,Agfg1,Agtpbp1,Aip,Als2,Anapc10,Anapc16,Anln,Antxr1,Aqp11,Aqp2,Arhgap10,Arhgap6,Arhgef18,Arl2,Arl8b,Asxl1,Atg12,Atg14,Atg4b,Atg5,Atg9a,Atp2b2,Atp7a,Bbs4,Becn1,Bicd1,Bnip1,Bnip3l,Brcc3,Brd8,Bre,Brpf3,Brwd3,Cacna1s,Cap1,Capzb,Casc5,Casp3,Cbx4,Cbx7,Ccdc101,Ccdc88a,Ccnb1,Ccr7,Cd24a,Cdc23,Cdc42bpb,Cdc6,Cdca5,Cenp…	NA	NA	NA	2810021B07Rik,Banp,Cd24a,Cenpv,Cltc,Ctcfl,Espn,Eya3,Ftcd,H2afx,H3f3a,H3f3b,Hist1h1a,Hist1h1b,Hist1h1c,Hist1h1d,Hist1h1e,Hist1h1t,Hist1h2ab,Hist1h2ac,Hist1h2ae,Hist1h2af,Hist1h2ag,Hist1h2ah,Hist1h2ai,Hist1h2ak,Hist1h2an,Hist1h2ap,Hist1h2bb,Hist1h2bc,Hist1h2be,Hist1h2bf,Hist1h2bg,Hist1h2bh,Hist1h2bj,Hist1h2bk,Hist1h2bl,Hist1h2bm,Hist1h2bn,Hist1h2bp,Hist1h3a,Hist1h3b,Hist1h3c,Hist1h3d,Hist1h3e,Hist1…	NA	1700012L04Rik,Add2,Agfg1,Ang,Arl2,Atg14,Atg9a,Aurka,Bahd1,Bap1,Brpf3,Brsk1,Cacna1s,Camsap1,Carm1,Cbx7,Ccnb1,Cd24a,Cdc42bpg,Cdc6,Cdca5,Cenph,Cep164,Cit,Cno,Coro2a,Csrp1,Ctcfl,Ctr9,Daam2,Eral1,Eya3,Fhl3,Gadd45a,Gata1,Gfap,Gnai3,Gypa,Haus1,Hdac11,Hdac6,Hist1h1a,Hist1h1c,Hist1h1d,Hist1h1e,Hist1h1t,Hist1h2ab,Hist1h2ac,Hist1h2ae,Hist1h2af,Hist1h2bb,Hist1h2bc,Hist1h2be,Hist1h2bf,Hist1h2bg,Hist1h2bh,Hist…	NA	0610037P05Rik,1500010J02Rik,1700012L04Rik,2210018M11Rik,4933400A11Rik,Abca1,Acd,Acin1,Acta1,Actg1,Actl6a,Actl6b,Actn4,Add2,Agfg1,Aip,Akt1,Als2,Antxr1,Aqp1,Aqp11,Arf6,Arhgap10,Arhgap17,Arhgap6,Arhgef18,Arrb1,Aspm,Atg14,Atg4b,Atg9a,Atm,Atp2b2,Atp7a,Aurkb,B230120H23Rik,Bahd1,Bak1,Bap1,Bax,Baz1a,Baz1b,Bbs1,Bbs2,Bcar1,Becn1,Bicd2,Bid,Birc5,Blm,Bnip1,Brcc3,Brpf3,Brsk1,Cacna1s,Calr,Camsap1,Cap1,Capza1,C…	NA
GO Biological Process	positive regulation of apoptosis	0										0		2610301G19Rik,2810002N01Rik,Ace,Adamtsl4,Adcy10,Adipoq,Adrb2,Agt,Aifm3,Aldh1a1,Apbb2,Apc,Apoe,Arhgef7,B4galt1,Bag1,Bak1,Bard1,Bax,Bcl10,Bcl3,Bik,Bmp7,Bnip1,Bnipl,Brca2,Capn10,Casp3,Casp9,Ccl5,Ccr5,Cd24a,Cd28,Cd3e,Cdk4,Cdkn1b,Cdkn2a,Cebpb,Ctnnb1,Dapk2,Dapk3,Ddit3,Dffb,Dusp6,Fadd,Fasl,Fcgr1,Fcgr3,Fnip2,Foxa1,Gal,Gch1,Gnb2l1,Gpx1,Gsk3b,Hc,Hmga2,Hmgb1,Hspd1,Id3,Ido1,Ier3,Ikbip,Ikbke,Il2ra,Inpp5d,Klf1…	NA	NA	NA	NA	NA	NA	NA	NA	NA	Ace,Adamtsl4,Adcy10,Adrb2,Apoe,Arhgef7,Atm,B230120H23Rik,B4galt1,Bak1,Bax,Bcl10,Bcl2l11,Bid,Bik,Bnip1,Bnipl,Casp1,Casp12,Casp3,Casp4,Casp7,Casp9,Ccr5,Cd24a,Cd40lg,Cdkn1b,Cebpb,Chek2,Cideb,Clip3,Col4a3,Cradd,Dapk1,Dapk2,Ddit3,Ddx20,Dedd2,Dhodh,Ern1,Esr2,Fadd,Fasl,Fcgr1,Fcgr3,Fnip2,Foxo3,Gal,Gch1,Gnb2l1,Gpx1,Gsdma,Gzmb,Hc,Hdac6,Hmgb1,Htra2,Id3,Ier3,Il1b,Inpp5d,Itga1,Itm2b,Klf10,Klf11,Map3k1,Men1,Ml…	NA
GO Biological Process	positive regulation of cell death	0										0		2610301G19Rik,2810002N01Rik,Ace,Adamtsl4,Adcy10,Adipoq,Adrb2,Agt,Aifm3,Aldh1a1,Apbb2,Apc,Apoe,Arhgef7,B4galt1,Bag1,Bak1,Bard1,Bax,Bcl10,Bcl3,Bik,Bmp7,Bnip1,Bnipl,Brca2,Capn10,Casp3,Casp9,Ccl5,Ccr5,Cd24a,Cd28,Cd3e,Cdk4,Cdkn1b,Cdkn2a,Cebpb,Ctnnb1,Dapk2,Dapk3,Ddit3,Dffb,Dusp6,Fadd,Fasl,Fcgr1,Fcgr3,Fnip2,Foxa1,Gal,Gch1,Gnb2l1,Gpx1,Gsk3b,Hc,Hmga2,Hmgb1,Hspd1,Id3,Ido1,Ier3,Ikbip,Ikbke,Il2ra,Inpp5d,Irf1…	NA	NA	NA	NA	NA	NA	NA	NA	NA	Ace,Adamtsl4,Adcy10,Adrb2,Apoe,Arhgef7,Atm,B230120H23Rik,B4galt1,Bak1,Bax,Bcl10,Bcl2l11,Bid,Bik,Bnip1,Bnipl,Casp1,Casp12,Casp3,Casp4,Casp7,Casp9,Ccr5,Cd24a,Cd40lg,Cdkn1b,Cebpb,Chek2,Cideb,Clip3,Col4a3,Cradd,Dapk1,Dapk2,Ddit3,Ddx20,Dedd2,Dhodh,Ern1,Esr2,Fadd,Fasl,Fcgr1,Fcgr3,Fnip2,Foxo3,Gal,Gch1,Gnb2l1,Gpx1,Gsdma,Gzmb,Hc,Hdac6,Hmgb1,Hp,Htra2,Id3,Ier3,Il1b,Inpp5d,Itga1,Itm2b,Klf10,Klf11,Lzts2,Map3k…	NA
GO Biological Process	positive regulation of immune effector process	0												Abcb9,Adora2b,B2m,BC096441,Ccl2,Ccr2,Ccr7,Cd24a,Cd28,Cd300a,Cd74,Clcf1,Fcer1g,Fcer2a,Fcgr1,Fcgr3,Fert2,Fgr,Foxf1a,H2-D1,H2-K1,H2-Q9,H2-T23,Hlx,Hspd1,Il4ra,Il6,Klre1,Lta,Paxip1,Pnp,Pvr,Pvrl2,Raet1d,Sema7a,Stat6,Stxbp2,Sykb,Tap1,Tap2,Tgfb1,Tnf,Traf2,Zp3	NA	NA	NA	NA	NA	NA	NA	NA	NA	NA	NA
GO Biological Process	positive regulation of immune response	0												Abcb9,Ada,B2m,BC096441,Bcl10,C1ra,C1rb,C1rl,C1s,C2,C4b,C4bp,C8g,Card9,Ccr2,Ccr7,Cd19,Cd247,Cd24a,Cd28,Cd38,Cd3e,Cd44,Cd74,Cd79a,Cfb,Clcf1,Clec7a,Cr1l,Fcer1g,Fcer2a,Fcgr1,Fcgr3,Fcnb,H2-Ab1,H2-D1,H2-K1,H2-Q9,H2-T23,Hc,Hspd1,Ido1,Klre1,Lat2,Lta,Lyn,Masp2,Mbl2,Myd88,Nfam1,Nfkbia,Plcg1,Plscr1,Pnp,Polr3b,Psen1,Ptpn6,Pvr,Pvrl2,Raet1d,Serping1,Sh2b2,Skap1,Slc11a1,Sykb,Tap1,Tap2,Tbk1,Themis,Tlr7,Tlr8,Tnf,…	NA	NA	NA	NA	NA	NA	NA	NA	NA	NA	NA
GO Biological Process	positive regulation of programmed cell death	0										0		2610301G19Rik,2810002N01Rik,Ace,Adamtsl4,Adcy10,Adipoq,Adrb2,Agt,Aifm3,Aldh1a1,Apbb2,Apc,Apoe,Arhgef7,B4galt1,Bag1,Bak1,Bard1,Bax,Bcl10,Bcl3,Bik,Bmp7,Bnip1,Bnipl,Brca2,Capn10,Casp3,Casp9,Ccl5,Ccr5,Cd24a,Cd28,Cd3e,Cdk4,Cdkn1b,Cdkn2a,Cebpb,Ctnnb1,Dapk2,Dapk3,Ddit3,Dffb,Dusp6,Fadd,Fasl,Fcgr1,Fcgr3,Fnip2,Foxa1,Gal,Gch1,Gnb2l1,Gpx1,Gsk3b,Hc,Hmga2,Hmgb1,Hspd1,Id3,Ido1,Ier3,Ikbip,Ikbke,Il2ra,Inpp5d,Itm2…	NA	NA	NA	NA	NA	NA	NA	NA	NA	Ace,Adamtsl4,Adcy10,Adrb2,Apoe,Arhgef7,Atm,B230120H23Rik,B4galt1,Bak1,Bax,Bcl10,Bcl2l11,Bid,Bik,Bnip1,Bnipl,Casp1,Casp12,Casp3,Casp4,Casp7,Casp9,Ccr5,Cd24a,Cd40lg,Cdkn1b,Cebpb,Chek2,Cideb,Clip3,Col4a3,Cradd,Dapk1,Dapk2,Ddit3,Ddx20,Dedd2,Dhodh,Ern1,Esr2,Fadd,Fasl,Fcgr1,Fcgr3,Fnip2,Foxo3,Gal,Gch1,Gnb2l1,Gpx1,Gsdma,Gzmb,Hc,Hdac6,Hmgb1,Htra2,Id3,Ier3,Il1b,Inpp5d,Itga1,Itm2b,Klf10,Klf11,Map3k1,Men1,Ml…	NA
GO Biological Process	posttranscriptional regulation of gene expression	0												Aars,Abcf1,Akt1,Ang,Apbb2,Apoa1,Apoa2,Atp8b2,Bcl3,Calr,Caprin2,Ccdc88c,Cdk4,Cdkn2a,Cirbp,Clp1,Cpeb2,Dazl,Dgcr8,Dhx9,Dpm3,Eefsec,Eif2a,Eif2ak1,Eif2b1,Eif2b4,Eif2c2,Eif2c3,Eif3k,Eif4e2,Eif4ebp3,Eif5b,Elavl1,Flna,Gipc1,Gm672,Gnaq,Gnb2l1,Hps4,Hspd1,Igf2bp1,Il6,Krt17,Krt7,Lin28a,Lsm14a,Lsm14b,Magoh,Mapkapk2,Mdm4,Mex3d,Morc3,Mov10,Mtif2,Myd88,Mylip,Nanos2,Nanos3,Ndufa13,Pa2g4,Paip2,Park7,Pcbp1,Pex6,Pim…	NA	NA	NA	NA	NA	NA	NA	NA	NA	NA	NA
GO Biological Process	primary metabolic process	0	0	0	0			0		0		0		0610031J06Rik,1110008L16Rik,1110034A24Rik,1190003J15Rik,1190005F20Rik,1500002O20Rik,1500010J02Rik,1600027N09Rik,1810009J06Rik,1810014F10Rik,1810024B03Rik,2010111I01Rik,2210010C04Rik,2310003H01Rik,2310079F23Rik,2410022L05Rik,2510012J08Rik,2810006K23Rik,2810422J05Rik,3110056O03Rik,4930402F06Rik,4930486L24Rik,4932415M13Rik,4933406M09Rik,5133401N09Rik,5930416I19Rik,6030422M02Rik,A230051G13Rik,A630055…	1110008L16Rik,1190003J15Rik,1810009J06Rik,2210010C04Rik,9530002B09Rik,A3galt2,AI314976,Abca7,Abcb10,Abcb9,Abcc1,Abcg1,Abi1,Abtb1,Acap1,Accs,Accsl,Ace,Acsbg2,Actl6a,Acvr1b,Adam15,Adam33,Adat1,Adssl1,Afmid,Ak3,Akt1,Alox12b,Alox8,Amz2,Anapc11,Apaf1,Apobec2,Apobec3,Aqp1,Asns,Atf3,Atp13a1,Atp1a2,Atp1b1,Atp5d,Atp6v1g2,B4galt5,Bach1,Bat1a,Batf3,Birc2,Birc3,Bmp7,Bop1,Cacna1a,Camk2b,Capn9,Capns1,Casz1,Cbx…	1110008L16Rik,1110018G07Rik,1110054O05Rik,1190003J15Rik,1190005F20Rik,1300010F03Rik,1700012L04Rik,1700054O13Rik,1810009J06Rik,1810014F10Rik,1810024B03Rik,2210010C04Rik,2210012G02Rik,2310003H01Rik,2700078E11Rik,2810006K23Rik,4930402F06Rik,A3galt2,A730011L01Rik,Aak1,Abca1,Abca3,Abca4,Abcb6,Abcc1,Abcc4,Abcc6,Abce1,Abcg2,Abhd5,Abi1,Acadm,Acadvl,Acbd3,Acd,Ace,Acer3,Acsbg1,Acsbg2,Acsf3,Acsl1,Acsl4,Actr…	1110008L16Rik,1110034A24Rik,1190005F20Rik,1500002O20Rik,1500010J02Rik,2210012G02Rik,2310003H01Rik,2810405K02Rik,2810422J05Rik,3110056O03Rik,4933406M09Rik,A230051G13Rik,Aak1,Abat,Abcb6,Abcb9,Abcc1,Abcc3,Abcc5,Abi1,Acaa1a,Acaca,Acd,Acsf3,Actl6a,Ada,Adad2,Adam17,Adam9,Adamts10,Adat1,Adc,Adipor1,Adrbk2,Afg3l1,Afg3l2,Agps,Ak2,Alpk2,Amhr2,Ampd3,Anapc11,Anapc2,Aph1a,Aplf,Apob48r,Aprt,Arl2,Art1,Art5,Ascc…	NA	NA	2500003M10Rik,A3galt2,AI314976,Abcg1,Acsf3,Acvrl1,Aicda,Aimp1,Apobec2,Aprt,Arl4a,Atp5d,Banp,Bclaf1,Bmp7,Btg1,Cacna1a,Car5a,Cars2,Cat,Cbfa2t3,Ccnl1,Cdk12,Cdk13,Cdt1,Cenpv,Cirbp,Cited2,Cops4,Creb3l3,Csf1r,Ctcfl,Ctu2,Cyb5r3,Dapk1,Ddah2,Ddit3,Ddx39,Ddx5,Diras1,Dnajb1,Dnajc8,Dusp1,Dusp5,Ebf4,Eef1a1,Eef1e1,Eif4a1,Eme2,Epha10,Eprs,Erbb3,Ern1,Eya3,Ftcd,Gapdh,Gata2,Gli1,Gm266,Gmeb1,Gtf2f1,H2afx,H3f3a,H3f3…	NA	0610007P22Rik,1110008L16Rik,1500002O20Rik,1700012L04Rik,2210012G02Rik,2310035K24Rik,2810405K02Rik,4921509C19Rik,Abcb6,Abcb9,Abcg2,Abcg4,Abt1,Acap1,Acer3,Acsf3,Adprhl1,Afg3l2,Agl,Agpat4,Ak7,Aldh9a1,Alpk1,Ampd3,Amz2,Ang,Apeh,Apobec3,Aprt,Arl2,Arx,Asprv1,Atoh8,Atp1b2,Atp5s,Atp8b1,Aurka,B2m,B4galt1,Bahd1,Bap1,Bcl11a,Birc2,Birc3,Bmp7,Bpgm,Brd7,Brpf3,Brsk1,Camk2g,Carhsp1,Carm1,Cbfa2t3,Cbx7,Ccnb1,Cct2,C…	NA	0610031J06Rik,1110008L16Rik,1110018G07Rik,1500002O20Rik,1500010J02Rik,1700012L04Rik,2210018M11Rik,2310003H01Rik,2310035K24Rik,2810006K23Rik,2810405K02Rik,2810422J05Rik,3110056O03Rik,4930402F06Rik,4933406M09Rik,A230051G13Rik,A630055G03Rik,A930038C07Rik,AF366264,AI314976,Aacs,Aak1,Abca1,Abca2,Abca4,Abcb10,Abcb4,Abcb6,Abcb9,Abcc1,Abcc4,Abcc5,Abcc6,Abcc9,Abcf1,Abcg1,Abcg2,Abhd5,Abtb1,Acaa1a,Acaa2,Aca…	NA
GO Biological Process	protein-DNA complex assembly	0	0	5.61633e-300			3.2492e-227	0		3.63863e-133		0		Gtf2a2,H1fx,H2afb1,H2afj,H2afx,H2afy,H3f3a,Hist1h1a,Hist1h1b,Hist1h1c,Hist1h1d,Hist1h1e,Hist1h1t,Hist1h2ab,Hist1h2ac,Hist1h2ae,Hist1h2af,Hist1h2ai,Hist1h2ak,Hist1h2an,Hist1h2ap,Hist1h2bb,Hist1h2bc,Hist1h2be,Hist1h2bf,Hist1h2bg,Hist1h2bh,Hist1h2bl,Hist1h2bm,Hist1h2bn,Hist1h2bp,Hist1h3a,Hist1h3b,Hist1h3c,Hist1h3d,Hist1h3e,Hist1h3f,Hist1h3g,Hist1h3h,Hist1h3i,Hist1h4a,Hist1h4b,Hist1h4c,Hist1h4d,Hist1…	Cenpv,H2afx,Hist1h1a,Hist1h1b,Hist1h1c,Hist1h1d,Hist1h1e,Hist1h1t,Hist1h2ab,Hist1h2ac,Hist1h2ae,Hist1h2af,Hist1h2ag,Hist1h2ah,Hist1h2ai,Hist1h2ak,Hist1h2an,Hist1h2ap,Hist1h2bb,Hist1h2bc,Hist1h2be,Hist1h2bf,Hist1h2bg,Hist1h2bh,Hist1h2bj,Hist1h2bk,Hist1h2bl,Hist1h2bm,Hist1h2bn,Hist1h2bp,Hist1h3a,Hist1h3b,Hist1h3c,Hist1h3d,Hist1h3e,Hist1h3f,Hist1h3g,Hist1h3h,Hist1h3i,Hist1h4a,Hist1h4b,Hist1h4c,Hist1…	1700012L04Rik,1700054O13Rik,Cenpv,Gm5132,Gtf2a2,H3f3a,Hist1h1a,Hist1h1b,Hist1h1c,Hist1h1d,Hist1h1e,Hist1h1t,Hist1h2ab,Hist1h2ac,Hist1h2ae,Hist1h2af,Hist1h2ai,Hist1h2ak,Hist1h2an,Hist1h2ap,Hist1h2bb,Hist1h2bc,Hist1h2be,Hist1h2bf,Hist1h2bg,Hist1h2bh,Hist1h2bl,Hist1h2bm,Hist1h2bn,Hist1h2bp,Hist1h3a,Hist1h3b,Hist1h3c,Hist1h3d,Hist1h3e,Hist1h3f,Hist1h3g,Hist1h3h,Hist1h3i,Hist1h4a,Hist1h4b,Hist1h4c,His…	NA	NA	Cenpv,Gtf2a2,H2afb1,H3f3a,Hist1h1a,Hist1h1b,Hist1h1c,Hist1h1d,Hist1h1e,Hist1h1t,Hist1h2ab,Hist1h2ac,Hist1h2ae,Hist1h2af,Hist1h2ag,Hist1h2ah,Hist1h2ai,Hist1h2ak,Hist1h2an,Hist1h2ap,Hist1h2bb,Hist1h2bc,Hist1h2be,Hist1h2bf,Hist1h2bg,Hist1h2bh,Hist1h2bj,Hist1h2bk,Hist1h2bl,Hist1h2bm,Hist1h2bn,Hist1h2bp,Hist1h3a,Hist1h3b,Hist1h3c,Hist1h3d,Hist1h3e,Hist1h3f,Hist1h3g,Hist1h3h,Hist1h3i,Hist1h4a,Hist1h4b,…	Cenpv,H2afx,H3f3a,H3f3b,Hist1h1a,Hist1h1b,Hist1h1c,Hist1h1d,Hist1h1e,Hist1h1t,Hist1h2ab,Hist1h2ac,Hist1h2ae,Hist1h2af,Hist1h2ag,Hist1h2ah,Hist1h2ai,Hist1h2ak,Hist1h2an,Hist1h2ap,Hist1h2bb,Hist1h2bc,Hist1h2be,Hist1h2bf,Hist1h2bg,Hist1h2bh,Hist1h2bj,Hist1h2bk,Hist1h2bl,Hist1h2bm,Hist1h2bn,Hist1h2bp,Hist1h3a,Hist1h3b,Hist1h3c,Hist1h3d,Hist1h3e,Hist1h3f,Hist1h3g,Hist1h3h,Hist1h3i,Hist1h4a,Hist1h4b,Hi…	NA	1700012L04Rik,Hist1h1a,Hist1h1c,Hist1h1d,Hist1h1e,Hist1h1t,Hist1h2ab,Hist1h2ac,Hist1h2ae,Hist1h2af,Hist1h2bb,Hist1h2bc,Hist1h2be,Hist1h2bf,Hist1h2bg,Hist1h2bh,Hist1h3a,Hist1h3b,Hist1h3c,Hist1h3d,Hist1h3e,Hist1h3f,Hist1h3g,Hist1h4a,Hist1h4b,Hist1h4c,Hist1h4d,Hist1h4f,Hist1h4h,Tspyl3	NA	1700012L04Rik,Cenpv,Gtf2a2,H2afx,H3f3a,Hist1h1a,Hist1h1c,Hist1h1d,Hist1h1e,Hist1h1t,Hist1h2ab,Hist1h2ac,Hist1h2ae,Hist1h2af,Hist1h2bb,Hist1h2bc,Hist1h2be,Hist1h2bf,Hist1h2bg,Hist1h2bh,Hist1h3a,Hist1h3b,Hist1h3c,Hist1h3d,Hist1h3e,Hist1h3f,Hist1h3g,Hist1h4a,Hist1h4b,Hist1h4c,Hist1h4d,Hist1h4f,Hist1h4h,Hist2h2ab,Hist2h2ac,Hist2h2bb,Hist2h2be,Hist2h3b,Hist2h3c1,Hist2h4,Hist3h2a,Hist3h2ba,Hist3h2bb-ps…	NA
GO Biological Process	protein-DNA complex subunit organization	0	0	0			1.08812e-226	0		1.052e-137		0		Gtf2a2,H1fx,H2afb1,H2afj,H2afx,H2afy,H3f3a,Hist1h1a,Hist1h1b,Hist1h1c,Hist1h1d,Hist1h1e,Hist1h1t,Hist1h2ab,Hist1h2ac,Hist1h2ae,Hist1h2af,Hist1h2ai,Hist1h2ak,Hist1h2an,Hist1h2ap,Hist1h2bb,Hist1h2bc,Hist1h2be,Hist1h2bf,Hist1h2bg,Hist1h2bh,Hist1h2bl,Hist1h2bm,Hist1h2bn,Hist1h2bp,Hist1h3a,Hist1h3b,Hist1h3c,Hist1h3d,Hist1h3e,Hist1h3f,Hist1h3g,Hist1h3h,Hist1h3i,Hist1h4a,Hist1h4b,Hist1h4c,Hist1h4d,Hist1…	Cenpv,H2afx,Hist1h1a,Hist1h1b,Hist1h1c,Hist1h1d,Hist1h1e,Hist1h1t,Hist1h2ab,Hist1h2ac,Hist1h2ae,Hist1h2af,Hist1h2ag,Hist1h2ah,Hist1h2ai,Hist1h2ak,Hist1h2an,Hist1h2ap,Hist1h2bb,Hist1h2bc,Hist1h2be,Hist1h2bf,Hist1h2bg,Hist1h2bh,Hist1h2bj,Hist1h2bk,Hist1h2bl,Hist1h2bm,Hist1h2bn,Hist1h2bp,Hist1h3a,Hist1h3b,Hist1h3c,Hist1h3d,Hist1h3e,Hist1h3f,Hist1h3g,Hist1h3h,Hist1h3i,Hist1h4a,Hist1h4b,Hist1h4c,Hist1…	1700012L04Rik,1700054O13Rik,Cenpv,Gm5132,Gtf2a2,H3f3a,Hist1h1a,Hist1h1b,Hist1h1c,Hist1h1d,Hist1h1e,Hist1h1t,Hist1h2ab,Hist1h2ac,Hist1h2ae,Hist1h2af,Hist1h2ai,Hist1h2ak,Hist1h2an,Hist1h2ap,Hist1h2bb,Hist1h2bc,Hist1h2be,Hist1h2bf,Hist1h2bg,Hist1h2bh,Hist1h2bl,Hist1h2bm,Hist1h2bn,Hist1h2bp,Hist1h3a,Hist1h3b,Hist1h3c,Hist1h3d,Hist1h3e,Hist1h3f,Hist1h3g,Hist1h3h,Hist1h3i,Hist1h4a,Hist1h4b,Hist1h4c,His…	NA	NA	Cenpv,Gtf2a2,H2afb1,H3f3a,Hist1h1a,Hist1h1b,Hist1h1c,Hist1h1d,Hist1h1e,Hist1h1t,Hist1h2ab,Hist1h2ac,Hist1h2ae,Hist1h2af,Hist1h2ag,Hist1h2ah,Hist1h2ai,Hist1h2ak,Hist1h2an,Hist1h2ap,Hist1h2bb,Hist1h2bc,Hist1h2be,Hist1h2bf,Hist1h2bg,Hist1h2bh,Hist1h2bj,Hist1h2bk,Hist1h2bl,Hist1h2bm,Hist1h2bn,Hist1h2bp,Hist1h3a,Hist1h3b,Hist1h3c,Hist1h3d,Hist1h3e,Hist1h3f,Hist1h3g,Hist1h3h,Hist1h3i,Hist1h4a,Hist1h4b,…	Cenpv,H2afx,H3f3a,H3f3b,Hist1h1a,Hist1h1b,Hist1h1c,Hist1h1d,Hist1h1e,Hist1h1t,Hist1h2ab,Hist1h2ac,Hist1h2ae,Hist1h2af,Hist1h2ag,Hist1h2ah,Hist1h2ai,Hist1h2ak,Hist1h2an,Hist1h2ap,Hist1h2bb,Hist1h2bc,Hist1h2be,Hist1h2bf,Hist1h2bg,Hist1h2bh,Hist1h2bj,Hist1h2bk,Hist1h2bl,Hist1h2bm,Hist1h2bn,Hist1h2bp,Hist1h3a,Hist1h3b,Hist1h3c,Hist1h3d,Hist1h3e,Hist1h3f,Hist1h3g,Hist1h3h,Hist1h3i,Hist1h4a,Hist1h4b,Hi…	NA	1700012L04Rik,Hist1h1a,Hist1h1c,Hist1h1d,Hist1h1e,Hist1h1t,Hist1h2ab,Hist1h2ac,Hist1h2ae,Hist1h2af,Hist1h2bb,Hist1h2bc,Hist1h2be,Hist1h2bf,Hist1h2bg,Hist1h2bh,Hist1h3a,Hist1h3b,Hist1h3c,Hist1h3d,Hist1h3e,Hist1h3f,Hist1h3g,Hist1h4a,Hist1h4b,Hist1h4c,Hist1h4d,Hist1h4f,Hist1h4h,Tnp1,Tspyl3	NA	1700012L04Rik,Baz1b,Cenpv,Gtf2a2,H2afx,H3f3a,Hist1h1a,Hist1h1c,Hist1h1d,Hist1h1e,Hist1h1t,Hist1h2ab,Hist1h2ac,Hist1h2ae,Hist1h2af,Hist1h2bb,Hist1h2bc,Hist1h2be,Hist1h2bf,Hist1h2bg,Hist1h2bh,Hist1h3a,Hist1h3b,Hist1h3c,Hist1h3d,Hist1h3e,Hist1h3f,Hist1h3g,Hist1h4a,Hist1h4b,Hist1h4c,Hist1h4d,Hist1h4f,Hist1h4h,Hist2h2ab,Hist2h2ac,Hist2h2bb,Hist2h2be,Hist2h3b,Hist2h3c1,Hist2h4,Hist3h2a,Hist3h2ba,Hist3h…	NA
GO Biological Process	protein folding	0												A830007P12Rik,Aars,Apoa2,B2m,Calr,Calr3,Canx,Cct4,Cct6b,Cct8,Cct8l1,Cd74,Clpx,Dnaja2,Dnajb1,Dnajb12,Dnajb13,Dnajb14,Dnajb2,Dnajb6,Dnajb8,Dnajb9,Dnajc11,Dnajc16,Dnajc5,Dnajc8,Dnajc9,Ero1l,Fkbp10,Fkbp14,Fkbp1a,Fkbp1b,Fkbp3,Fkbp4,Fkbp5,Fkbp8,Grpel1,H2-DMb2,H2-Ke2,Hspa8,Hspa9,Hspd1,Hspe1,Mesdc2,Nktr,Pdrg1,Pfdn1,Pfdn2,Ppia,Ppid,Ppie,Ppih,Ppil3,Ptges3,Qsox1,Ranbp2,Sep15,Sh3glb1,Stub1,Tbcc,Tbcd,Tcp1,Tor…	NA	NA	NA	NA	NA	NA	NA	NA	NA	NA	NA
GO Biological Process	protein metabolic process	0		0								0		1110034A24Rik,1810009J06Rik,1810024B03Rik,2010111I01Rik,2210010C04Rik,2410022L05Rik,2810006K23Rik,2810422J05Rik,3110056O03Rik,4930486L24Rik,4932415M13Rik,A830007P12Rik,AF366264,Aars,Aars2,Aatk,Abcf1,Abi1,Ace,Acr,Actl6a,Acvr1b,Acy1,Adam10,Adam15,Adam17,Adam23,Adam33,Adam6a,Adam6b,Adam9,Adamts10,Adamts13,Adamts14,Adamts20,Adh5,Adprh,Adra2b,Adrbk1,Adrbk2,Afg3l1,Aimp2,Akt1,Akt3,Alpk3,Amhr2,Amz1,Amz2,…	NA	1110018G07Rik,1810009J06Rik,1810024B03Rik,2210010C04Rik,2700078E11Rik,2810006K23Rik,Aak1,Abca1,Abhd5,Abi1,Ace,Adam10,Adam2,Adam21,Adam4,Adam9,Adamts1,Adamts5,Adck1,Adora1,Adprh,Adrbk2,Afg3l2,Agtpbp1,Aimp1,Aip,Alg6,Alpk2,Amhr2,Amz2,Anapc10,Anapc16,Aph1a,Asphd2,Asrgl1,Atg10,Atg4b,Atg5,Atp6ap2,Atp7a,Axl,B2m,B3galt4,B3gnt2,B3gnt4,B4galnt2,B4galt1,Bbs10,Bcl11a,Birc2,Birc3,Blk,Bmp2k,Bmpr2,Bmx,Bnip3l,Br…	NA	NA	NA	NA	NA	NA	NA	1110018G07Rik,2810006K23Rik,2810422J05Rik,3110056O03Rik,A930038C07Rik,AF366264,Aak1,Abca1,Abcf1,Abhd5,Abtb1,Acaca,Ace,Acp1,Acr,Actl6a,Acy1,Adam19,Adam2,Adam9,Adamts5,Adck1,Adrbk2,Afg3l1,Afg3l2,Aimp2,Aip,Akt1,Alpk3,Amfr,Amz2,Arrb1,Art4,Asph,Asphd2,Atg4a,Atg4b,Atg4d,Atm,Atp7a,Aurkb,Axl,B230120H23Rik,B2m,B3galt2,B3gnt2,B3gnt7,B4galnt2,B4galt1,Bag2,Bap1,Baz1b,Birc2,Birc3,Bmp2k,Bmpr1a,Bmpr2,Bmx,Brap,B…	NA
GO Biological Process	regulation of adaptive immune response	0												Abcb9,Ada,B2m,BC096441,Ccr2,Ccr7,Cd24a,Cd28,Cd44,Cd74,Clcf1,Fcer1g,Fcer2a,Fcgr1,Fcgr2b,Fcgr3,H2-Ab1,H2-D1,H2-K1,H2-Q9,H2-T23,Hlx,Hspd1,Il4ra,Lta,Paxip1,Pnp,Ptpn6,Pvr,Pvrl2,Rc3h1,Samsn1,Slc11a1,Spn,Stat6,Tap1,Tap2,Tgfb1,Tnf,Tnfrsf13c,Traf2,Zp3	NA	NA	NA	NA	NA	NA	NA	NA	NA	NA	NA
GO Biological Process	regulation of adaptive immune response based on somatic recombination of immune receptors built from immunoglobulin superfamily domains	0												Abcb9,Ada,B2m,BC096441,Ccr2,Ccr7,Cd24a,Cd28,Clcf1,Fcer1g,Fcer2a,Fcgr1,Fcgr2b,Fcgr3,H2-Ab1,H2-D1,H2-K1,H2-Q9,H2-T23,Hlx,Hspd1,Il4ra,Lta,Paxip1,Pnp,Ptpn6,Pvr,Pvrl2,Rc3h1,Slc11a1,Spn,Stat6,Tap1,Tap2,Tgfb1,Tnf,Tnfrsf13c,Traf2,Zp3	NA	NA	NA	NA	NA	NA	NA	NA	NA	NA	NA
GO Biological Process	regulation of immune response	0		0										Abcb9,Ada,Adora2b,Apoa1,Apoa2,Arrb2,B2m,BC096441,Bcl10,C1ra,C1rb,C1rl,C1s,C2,C4b,C4bp,C8g,Card9,Ccr1,Ccr2,Ccr7,Cd19,Cd247,Cd24a,Cd28,Cd300a,Cd38,Cd3e,Cd44,Cd74,Cd79a,Cfb,Clcf1,Clec2d,Clec7a,Cr1l,Fadd,Fcer1g,Fcer2a,Fcgr1,Fcgr2b,Fcgr3,Fcnb,Fert2,Fgr,Foxf1a,H2-Ab1,H2-Bl,H2-D1,H2-K1,H2-Q9,H2-T23,H47,Hc,Hlx,Hspd1,Ido1,Il2ra,Il4ra,Il6,Inpp5d,Klre1,Lat2,Lta,Lyn,Masp2,Mbl2,Myd88,Myo1f,Nfam1,Nfkbia,Paxip1…	NA	Ada,Adora3,B2m,BC096441,Bcl10,C2,C3,C4b,C6,Card9,Ccr1,Ccr2,Ccr7,Cd19,Cd247,Cd24a,Cd276,Cd38,Cd40lg,Cd44,Cd55,Cd59a,Cd59b,Cfb,Cr1l,Ctla4,Ctsg,Daf2,Dpp4,F2rl1,Fcer1a,Fcgr2b,Fcgr3,Fcnb,Fgr,Foxp3,Fyn,Gab2,Gata3,H2-K1,Hc,Hspd1,Il33,Il4,Il4ra,Inpp5d,Irak3,Klhl6,Klre1,Lat2,Malt1,Ms4a2,Plscr1,Polr3b,Polr3g,Psen2,Ptpn6,Rbck1,Samhd1,Samsn1,Sash3,Sh2b2,Skap1,Socs5,Spn,Stat5b,Tbx21,Tgfb1,Themis,Ticam1,Tlr7,T…	NA	NA	NA	NA	NA	NA	NA	NA	NA
GO Biological Process	regulation of immune system process	0	0	0								0		2010001M09Rik,2010002M12Rik,Abcb9,Acin1,Ada,Adam10,Adam17,Adipoq,Adora2b,Ap3d1,Apc,Apoa1,Apoa2,Arf6,Arrb2,B2m,BC096441,Bcl10,Bloc1s3,Btn1a1,Btn2a2,C1ra,C1rb,C1rl,C1s,C2,C4b,C4bp,C8g,Card9,Casp3,Ccl2,Ccl3,Ccl5,Ccr1,Ccr2,Ccr7,Cd19,Cd247,Cd24a,Cd28,Cd300a,Cd38,Cd3e,Cd44,Cd74,Cd79a,Cd80,Cd81,Cd83,Cdkn2a,Cfb,Clcf1,Clec2d,Clec7a,Clptm1,Cnr2,Cr1l,Csf1,Ctnnb1,Dll1,Dtx1,Edn3,Elf1,Ets1,Fadd,Fcer1g,Fcer2a,F…	Abcb9,Bcar1,Btn2a2,Card9,Cd47,Csf1,Ets1,Fcgr1,Fcnb,Fgr,Gm885,H2-D1,H2-Q9,Hist1h4a,Hist1h4b,Hist1h4c,Hist1h4d,Hist1h4f,Hist1h4h,Hist1h4i,Hist1h4j,Hist1h4k,Hist1h4n,Hist2h4,Hmox1,Hps1,Ikzf1,Il28ra,Inpp5d,Lst1,Lta,Masp2,Mll5,Notch2,Prkcq,Psen1,Ptprj,Rbck1,Runx1,Sh2b2,Slamf7,Slc11a1,Spn,Sykb,Tac1,Tcf3,Tgfbr2,Tnf,Ubash3a,Unc13d,Zbtb7b,Zfp36,Zfpm1,Zp3	2010002M12Rik,Ada,Adam10,Adora1,Adora3,Aqp3,B2m,BC096441,Bcl10,Btn2a2,C2,C3,C4b,C6,Camk1d,Car2,Card9,Casp3,Ccr1,Ccr2,Ccr7,Cd19,Cd247,Cd24a,Cd274,Cd276,Cd38,Cd40lg,Cd44,Cd47,Cd55,Cd59a,Cd59b,Cd80,Cd81,Cfb,Cnr2,Cr1l,Ctla4,Ctnnb1,Ctsg,Daf2,Dpp4,Dtx1,Dusp3,F2rl1,Fcer1a,Fcgr2b,Fcgr3,Fcnb,Fgf10,Fgr,Figf,Flt3,Foxo3,Foxp3,Fyn,Gab2,Gal,Gata1,Gata3,Gm614,Gpam,H2-K1,Hc,Hist1h4a,Hist1h4b,Hist1h4c,Hist1h4d,Hi…	NA	NA	NA	NA	NA	NA	NA	2010001M09Rik,2010002M12Rik,Abcb9,Acin1,Ada,Adora3,Ankrd54,Apoa1,Aqp3,Arf6,Atm,B2m,BC096441,Bcar1,Bcl10,Blm,Btn2a2,C3ar1,C5ar1,C8g,Car2,Casp3,Ccr1,Ccr2,Ccr7,Cd19,Cd226,Cd247,Cd24a,Cd274,Cd276,Cd40lg,Cd44,Cd47,Cd55,Cd59a,Cd59b,Cdc37,Clec2i,Clptm1,Cnr2,Col3a1,Csf1,Csk,Ctsg,Cx3cl1,Daf2,Dtx1,Elf1,Erbb2,Ets1,Fadd,Fcgr1,Fcgr2b,Fcgr3,Fcnb,Fgf10,Fgr,Figf,Flt3,Foxf1a,Foxj1,Foxo3,Gab2,Gal,Gata1,Gata2,Gfi1b…	NA
GO Biological Process	regulation of translation	0												Aars,Abcf1,Akt1,Ang,Bcl3,Calr,Caprin2,Cdk4,Cirbp,Cpeb2,Dazl,Eefsec,Eif2a,Eif2ak1,Eif2b1,Eif2b4,Eif2c2,Eif2c3,Eif3k,Eif4e2,Eif4ebp3,Eif5b,Gm672,Gnb2l1,Igf2bp1,Il6,Krt17,Krt7,Lin28a,Lsm14a,Lsm14b,Magoh,Mtif2,Nanos2,Nanos3,Ndufa13,Pa2g4,Paip2,Pcbp1,Piwil1,Poldip3,Ppp1ca,Ppp1r15a,Ppp1r15b,Prkca,Qk,Rbm14,Rbm4b,Rgs2,Rhoc,Rps6kb1,Rps9,Sepsecs,Serp1,Sox4,Taco1,Tnf,Tnrc6c,Trmt6,Uhmk1,Upf3a,Ybx2,Zfp36l1	NA	NA	NA	NA	NA	NA	NA	NA	NA	NA	NA
GO Biological Process	response to bacterium	0		0			0					0		Ace,Adam17,Adh5,B2m,Baiap2,Bcl10,Bcl3,Card9,Ccl2,Ccl5,Ccr1,Ccr5,Ccr7,Cd24a,Cebpb,Cebpe,Cmpk2,Cnr2,Comt,Cx3cr1,Cxcl15,Cxcl2,Cyp11a1,Cyp17a1,Cyp27b1,Defa-rs7,Defa17,Defa20,Defa21,Defa22,Defa25,Defa26,Defa3,Defa5,Defa6,Defb1,Defb10,Defb11,Defb12,Defb13,Defb14,Defb15,Defb19,Defb2,Defb25,Defb3,Defb34,Defb35,Defb36,Defb37,Defb38,Defb39,Defb4,Defb40,Defb5,Defb50,Defb6,Defb7,Defb8,Defb9,F2r,F3,Fasl,Fcer1…	NA	Abca1,Ace,Aqp2,Atp4b,B2m,Bcl10,Card9,Ccr1,Ccr5,Ccr7,Cd24a,Cd47,Cebpb,Cited1,Cnr2,Comt,Ctsg,Defa-rs7,Defa17,Defa20,Defa21,Defa22,Defa25,Defa26,Defa3,Defa5,Defa6,Defb1,Defb10,Defb11,Defb12,Defb13,Defb14,Defb15,Defb2,Defb3,Defb34,Defb35,Defb37,Defb38,Defb39,Defb4,Defb40,Defb5,Defb50,Defb6,Defb7,Defb8,Defb9,F2r,Fasl,Fcgr2b,Fgf10,Fgr,Gm10104,Gm14850,Gm15284,Gm15292,Gm15293,Gm15299,Gm15308,Gm15315,Gm66…	NA	NA	Abcc5,Aldh2,Alpl,Camp,Cd14,Cd24a,Cebpb,Cnr2,Comt,Cyp11a1,Defa-rs7,Defa17,Defa20,Defa21,Defa22,Defa25,Defa26,Defa3,Defa5,Defa6,Defb1,Defb10,Defb11,Defb12,Defb13,Defb14,Defb15,Defb2,Defb3,Defb34,Defb35,Defb37,Defb38,Defb39,Defb4,Defb40,Defb5,Defb50,Defb6,Defb7,Defb8,Defb9,Dusp10,Epha3,F2r,Fmo1,Gbp9,Gch1,Gm10104,Gm14850,Gm15284,Gm15292,Gm15293,Gm15299,Gm15308,Gm15315,Gm6696,Iigp1,Il12a,Il1a,Il1b,Ira…	NA	NA	NA	NA	Abca1,Abcc5,Ace,Acp5,Adm,B2m,Bcl10,C5ar1,Casp1,Ccr1,Ccr5,Ccr7,Cd24a,Cd47,Cebpb,Cebpe,Cmpk2,Cnr2,Comt,Ctsg,Cx3cr1,Cxcl15,Cxcl2,Defa-rs7,Defa17,Defa20,Defa21,Defa22,Defa25,Defa26,Defa3,Defa5,Defa6,Defb1,Defb10,Defb11,Defb12,Defb13,Defb14,Defb15,Defb2,Defb3,Defb34,Defb35,Defb37,Defb38,Defb39,Defb4,Defb40,Defb5,Defb50,Defb6,Defb7,Defb8,Defb9,F2r,Fasl,Fcgr1,Fcgr2b,Fgf10,Fgr,Gch1,Gm10104,Gm14850,Gm1528…	NA
GO Biological Process	response to biotic stimulus	0		0			0		3.75958e-168			0		2010002M12Rik,Ace,Acr,Adam17,Adh5,B2m,Baiap2,Bak1,Bcl10,Bcl3,Becn1,Card9,Ccl2,Ccl5,Ccr1,Ccr5,Ccr7,Cd207,Cd24a,Cebpb,Cebpe,Clec4n,Clec5a,Clec7a,Cmpk2,Cnr2,Comt,Cotl1,Cx3cr1,Cxcl15,Cxcl2,Cyp11a1,Cyp17a1,Cyp27b1,Ddit3,Defa-rs7,Defa17,Defa20,Defa21,Defa22,Defa25,Defa26,Defa3,Defa5,Defa6,Defb1,Defb10,Defb11,Defb12,Defb13,Defb14,Defb15,Defb19,Defb2,Defb25,Defb3,Defb34,Defb35,Defb36,Defb37,Defb38,Defb39…	NA	2010002M12Rik,6330512M04Rik,Abca1,Ace,Apobec3,Aqp2,Atg10,Atp4b,B2m,Bcl10,Becn1,Bnip3l,Bst2,Card9,Ccr1,Ccr5,Ccr7,Cd24a,Cd47,Cebpb,Cited1,Clec4n,Cnr2,Comt,Ctsg,Cxcl9,Ddit3,Defa-rs7,Defa17,Defa20,Defa21,Defa22,Defa25,Defa26,Defa3,Defa5,Defa6,Defb1,Defb10,Defb11,Defb12,Defb13,Defb14,Defb15,Defb2,Defb3,Defb34,Defb35,Defb37,Defb38,Defb39,Defb4,Defb40,Defb5,Defb50,Defb6,Defb7,Defb8,Defb9,Duox2,Eif2ak3,F…	NA	NA	Abcc5,Aldh2,Alpl,Apobec3,Bst2,Camp,Cd14,Cd24a,Cebpb,Clec4n,Clec5a,Cnr2,Comt,Cotl1,Cyp11a1,Defa-rs7,Defa17,Defa20,Defa21,Defa22,Defa25,Defa26,Defa3,Defa5,Defa6,Defb1,Defb10,Defb11,Defb12,Defb13,Defb14,Defb15,Defb2,Defb3,Defb34,Defb35,Defb37,Defb38,Defb39,Defb4,Defb40,Defb5,Defb50,Defb6,Defb7,Defb8,Defb9,Dicer1,Duox2,Dusp10,Epha3,F2r,Fmo1,Gbp9,Gch1,Gm10104,Gm14850,Gm15284,Gm15292,Gm15293,Gm15299,Gm…	NA	Ccl5,Cebpb,Clec7a,Cnr2,F2r,H2-Q9,Ier3,Ifitm1,Ifitm2,Ifitm3,Ifitm5,Ifitm6,Il12a,Il6ra,Itln1,Klra10,Lta,Ltc4s,Ncf1,Nfkbia,Nos2,Notch1,Nrf1,Pde5a,Pik3r1,Pla2g4a,Plcg2,Ppp1r15b,Sftpb,Siva1,Socs1,Stat1,Tlr7,Tlr8,Tnf,Txnip,Zbp1	NA	NA	2010002M12Rik,6330512M04Rik,Abca1,Abcc5,Ace,Acp5,Acr,Adm,B2m,Bak1,Bcl10,Bcl2l11,Becn1,Bst2,C5ar1,Casp1,Ccr1,Ccr5,Ccr7,Cd24a,Cd47,Cebpb,Cebpe,Clec4n,Cmpk2,Cnr2,Comt,Ctsg,Cx3cr1,Cxcl15,Cxcl2,Ddit3,Defa-rs7,Defa17,Defa20,Defa21,Defa22,Defa25,Defa26,Defa3,Defa5,Defa6,Defb1,Defb10,Defb11,Defb12,Defb13,Defb14,Defb15,Defb2,Defb3,Defb34,Defb35,Defb37,Defb38,Defb39,Defb4,Defb40,Defb5,Defb50,Defb6,Defb7,De…	NA
GO Biological Process	response to other organism	0		0			0					0		2010002M12Rik,Ace,Adam17,Adh5,B2m,Baiap2,Bak1,Bcl10,Bcl3,Becn1,Card9,Ccl2,Ccl5,Ccr1,Ccr5,Ccr7,Cd207,Cd24a,Cebpb,Cebpe,Clec4n,Clec5a,Clec7a,Cmpk2,Cnr2,Comt,Cotl1,Cx3cr1,Cxcl15,Cxcl2,Cyp11a1,Cyp17a1,Cyp27b1,Defa-rs7,Defa17,Defa20,Defa21,Defa22,Defa25,Defa26,Defa3,Defa5,Defa6,Defb1,Defb10,Defb11,Defb12,Defb13,Defb14,Defb15,Defb19,Defb2,Defb25,Defb3,Defb34,Defb35,Defb36,Defb37,Defb38,Defb39,Defb4,Def…	NA	2010002M12Rik,Abca1,Ace,Apobec3,Aqp2,Atp4b,B2m,Bcl10,Becn1,Bnip3l,Bst2,Card9,Ccr1,Ccr5,Ccr7,Cd24a,Cd47,Cebpb,Cited1,Clec4n,Cnr2,Comt,Ctsg,Cxcl9,Defa-rs7,Defa17,Defa20,Defa21,Defa22,Defa25,Defa26,Defa3,Defa5,Defa6,Defb1,Defb10,Defb11,Defb12,Defb13,Defb14,Defb15,Defb2,Defb3,Defb34,Defb35,Defb37,Defb38,Defb39,Defb4,Defb40,Defb5,Defb50,Defb6,Defb7,Defb8,Defb9,Duox2,F2r,F2rl1,Fasl,Fcgr2b,Fgf10,Fgr,Fox…	NA	NA	Abcc5,Aldh2,Alpl,Apobec3,Bst2,Camp,Cd14,Cd24a,Cebpb,Clec4n,Clec5a,Cnr2,Comt,Cotl1,Cyp11a1,Defa-rs7,Defa17,Defa20,Defa21,Defa22,Defa25,Defa26,Defa3,Defa5,Defa6,Defb1,Defb10,Defb11,Defb12,Defb13,Defb14,Defb15,Defb2,Defb3,Defb34,Defb35,Defb37,Defb38,Defb39,Defb4,Defb40,Defb5,Defb50,Defb6,Defb7,Defb8,Defb9,Dicer1,Duox2,Dusp10,Epha3,F2r,Fmo1,Gbp9,Gch1,Gm10104,Gm14850,Gm15284,Gm15292,Gm15293,Gm15299,Gm…	NA	NA	NA	NA	2010002M12Rik,Abca1,Abcc5,Ace,Acp5,Adm,B2m,Bak1,Bcl10,Bcl2l11,Becn1,Bst2,C5ar1,Casp1,Ccr1,Ccr5,Ccr7,Cd24a,Cd47,Cebpb,Cebpe,Clec4n,Cmpk2,Cnr2,Comt,Ctsg,Cx3cr1,Cxcl15,Cxcl2,Defa-rs7,Defa17,Defa20,Defa21,Defa22,Defa25,Defa26,Defa3,Defa5,Defa6,Defb1,Defb10,Defb11,Defb12,Defb13,Defb14,Defb15,Defb2,Defb3,Defb34,Defb35,Defb37,Defb38,Defb39,Defb4,Defb40,Defb5,Defb50,Defb6,Defb7,Defb8,Defb9,Dicer1,F2r,Fad…	NA
GO Biological Process	response to stress	0		0			0					0		2010002M12Rik,2310003H01Rik,2310016C08Rik,4930547N16Rik,5930416I19Rik,AY761184,Aacs,Aars,Abat,Abhd2,Acadm,Acd,Ace,Actl6a,Actn4,Ada,Adam15,Adam17,Adam9,Adamts13,Adh5,Adipoq,Adrb2,Adrbk1,Agt,Agtr1b,Aif1,Akt1,Aldh1a1,Als2,Ang,Angptl4,Apaf1,Apc,Apoa2,Apoa4,Apoa5,Apoe,Arf4,Atg9a,Atp2a1,Atp7a,Atrx,Axl,B2m,B4galt1,BC004004,BC013712,Bak1,Bard1,Bax,Bcl10,Bcl3,Becn1,Bloc1s3,Bmpr2,Brca2,Brsk1,Btg2,C1ra,C1rb…	NA	1110054O05Rik,2010002M12Rik,2310003H01Rik,A730011L01Rik,AY761184,Abhd2,Acadm,Acd,Ace,Actr5,Ada,Adam9,Adora1,Adora3,Adra1a,Adrb1,Adrb2,Adrb3,Agtr1b,Aimp1,Alas2,Alkbh8,Alox5,Als2,Angpt1,Anxa5,Aplf,Aqp2,Asns,Atad5,Atg10,Atg12,Atg14,Atg4b,Atg5,Atg9a,Atp7a,Atrx,Axl,B2m,B4galt1,Bcl10,Becn1,Bmpr2,Bnip3l,Brcc3,Bre,Bst2,C2,C3,C4b,Camk1d,Camk2g,Car2,Car3,Card9,Casc3,Casp3,Casp6,Ccnb1,Ccno,Ccr1,Ccr2,Ccr5,Cc…	NA	NA	2210018M11Rik,2310016C08Rik,5930416I19Rik,A730011L01Rik,AY761184,Aatf,Abat,Abhd2,Acat1,Adcyap1r1,Adora3,Agt,Ahr,Akt1,Alb,Aldh2,Alkbh2,Ang,Angpt1,Apitd1,Apoh,Atg4b,Bst2,Btg1,C1ra,C1rb,C1rl,C1s,C3,C4bp,Camk1d,Camp,Car2,Car3,Casp3,Casp9,Ccnb1,Ccr4,Ccrl2,Cd14,Cd24a,Cd300a,Cd55,Cd9,Cdk1,Cdk7,Chat,Chek2,Chid1,Cib1,Clec2h,Clec4d,Clec4n,Clec5a,Cnr2,Col3a1,Comt,Cotl1,Cpb2,Creb3l2,Creb3l3,Crhr1,Cxcl16,Cxcr…	NA	NA	NA	NA	2010002M12Rik,2210018M11Rik,2310003H01Rik,2310016C08Rik,2310035K24Rik,AY761184,Aacs,Abhd2,Acd,Ace,Acp5,Actl6a,Actn4,Actr5,Ada,Adam9,Adm,Adora3,Adrb1,Adrb2,Adrb3,Agtr1b,Akt1,Alas2,Aldob,Alkbh2,Alkbh8,Alox5,Als2,Amfr,Angpt1,Angptl4,Aplf,Apoa4,Apoa5,Apoe,Apold1,Aqp1,Atad5,Atg14,Atg4b,Atg9a,Atm,Atox1,Atp7a,Atrx,Avpr1b,Axl,B230120H23Rik,B2m,B4galt1,BC013712,Bak1,Bax,Baz1b,Bcl10,Becn1,Blm,Bmpr2,Brcc3,B…	NA
GO Biological Process	RNA splicing	0						2.50091e-69						2510012J08Rik,Bat1a,Ccdc55,Cdc5l,Clasrp,Clp1,Crnkl1,Ddx39,Ddx5,Dgcr14,Dhx15,Dhx8,Eftud2,Gemin5,Gemin7,Hnrnpa1,Hnrnpa2b1,Hnrnpa3,Hnrnpc,Isy1,Lgals3,Lsm1,Lsm4,Lsm7,Magoh,Magohb,Nhp2l1,Nol3,Pnn,Ppie,Ppih,Ppil3,Ppp1r8,Prmt7,Prpf31,Prpf38b,Prpf39,Prpf40a,Prpf4b,Prpf6,Puf60,Qk,Rbfox2,Rbm14,Rbm15b,Rbm17,Rbm25,Rbm38,Rbm39,Rbm4b,Rnps1,Rsrc1,Sf3a2,Sf3a3,Sf3b1,Sfpq,Snrnp200,Snrnp25,Snrnp35,Snrnp70,Snrpa1,Sn…	NA	NA	NA	NA	NA	Cdk12,Cdk13,Ddx39,Ddx5,Hnrnpa2b1,Jmjd6,Khsrp,Ptbp1,Rbm38,Sf3a1,Sfpq,Srrm1,Srsf2,Syf2,Txnl4a	NA	NA	NA	NA	NA
GO Biological Process	small GTPase mediated signal transduction	0												1700018F24Rik,Agap2,Apoa1,Apoc3,Apoe,Arf1,Arf2,Arf4,Arf6,Arhgdia,Arhgef18,Arl11,Arl15,Arl3,Arl4a,Arl4c,Arl4d,Arl5b,Arl5c,Arl8a,Arl8b,B230208H17Rik,Baiap2,Bcar3,Brap,Cdc42ep1,Celsr1,Dbnl,Dhcr24,Diras2,Dok2,Farp2,Gem,Gm266,Gm4871,Gna13,Grb2,Grlf1,Ift27,Iqgap2,Itsn1,Lat,Lrrk1,Nisch,Pecam1,Psd3,Ptplad1,Rab1,Rab10,Rab11a,Rab11b,Rab14,Rab18,Rab20,Rab21,Rab23,Rab24,Rab26,Rab2b,Rab33b,Rab35,Rab36,Rab38,R…	NA	NA	NA	NA	NA	NA	NA	NA	NA	NA	NA
GO Biological Process	small molecule metabolic process	0										0		1190003J15Rik,1810014F10Rik,2010111I01Rik,2310079F23Rik,2410022L05Rik,A230051G13Rik,A530098C11Rik,Aacs,Aars,Aars2,Aasdh,Abat,Abca2,Abcb4,Abcb6,Abcb9,Abcc1,Abcc3,Abcc6,Abce1,Abcf1,Acaa1a,Acadl,Acadm,Accs,Accsl,Acer3,Acmsd,Acox3,Acsf2,Acsf3,Acy1,Ada,Adc,Adcy10,Adcy2,Adh4,Adh5,Adipoq,Adipor1,Adpgk,Adssl1,Afmid,Agpat2,Agpat5,Agpat9,Ahcy,Ak2,Ak3,Ak4,Akt1,Aldh1a1,Aldh1l2,Aldh5a1,Aldh9a1,Alox12e,Amdhd2,…	NA	NA	NA	NA	NA	NA	NA	NA	NA	2810405K02Rik,4832428D23Rik,A230051G13Rik,AB099516,AI314976,Aacs,Abca1,Abca2,Abca4,Abcb10,Abcb4,Abcb6,Abcb9,Abcc1,Abcc4,Abcc5,Abcc6,Abcc9,Abcf1,Abcg1,Abcg2,Abhd5,Acaa1a,Acaa2,Acaca,Acacb,Acnat1,Acnat2,Aco1,Acot3,Acot4,Acsbg2,Acsf3,Acsl1,Acsl4,Acsl5,Acss1,Acy1,Ada,Adc,Adcy10,Adcy4,Adcy6,Adcy9,Adipor1,Adipor2,Adpgk,Adssl1,Afmid,Agpat2,Agpat5,Ahcyl2,Ak2,Akt1,Aldh1l1,Aldh4a1,Aldh9a1,Aldob,Alkbh2,Alkb…	NA
GO Biological Process	T cell activation	0		3.6066792146411e-322					1.81831e-66					Ada,Adam17,Apc,Atp7a,B2m,Bax,Bcl11a,Bcl3,Ccr7,Cd28,Cd3d,Cd3e,Cd48,Cd74,Crip3,Ctnnb1,Cxcr4,Ddost,Dock2,Egr1,Fkbp1a,Fkbp1b,Flt3,Fut7,Gimap1,Gimap5,Hsh2d,Hspd1,Icam1,Ifnar1,Ikzf1,Il6,Irf1,Itgam,Itgav,Itpkb,Jag2,Mink1,Myh9,Nhej1,Nlrc3,Psen1,Relb,Rhoh,Rpl22,Sla2,Slc11a1,Smad3,Sox4,Sp3,Spn,Srf,Sykb,Tcf3,Tgfb1,Themis,Treml2,Trp53,Vav1,Zap70,Zfp36l1,Zfp36l2	NA	Ada,Atp7a,B2m,Bcl11a,Ccr7,Cd276,Ctnnb1,Dpp4,Egr1,F2rl1,Flt3,Foxp3,Fyn,Fzd7,Gata3,Hsh2d,Hspd1,Icam1,Ifnar1,Ikzf1,Irf1,Itgav,Itgb2,Itpkb,Malt1,Mink1,Myh9,Ncor1,Nhej1,Nlrc3,Psen2,Rag1,Rhoh,Rpl22,Sla2,Sp3,Spn,Stat5b,Tgfb1,Themis,Treml2,Trp53,Vav1,Zbtb32,Zfp36l1	NA	NA	NA	NA	Bcl11a,Cd276,Cd48,Ddost,Flt3,Gimap1,Gimap5,Hsh2d,Ikzf1,Itpkb,Myh9,Rab27a,Sp3,Zfp36l1,Zfp36l2	NA	NA	NA	NA
GO Biological Process	translation	0						3.82197e-100						1110034A24Rik,2810006K23Rik,2810422J05Rik,Aars,Aars2,Abcf1,Aimp2,Akt1,Cars2,Dalrd3,Eef1a1,Eef1a2,Eef1b2,Eef2,Eefsec,Eftud2,Eif1b,Eif2a,Eif2b1,Eif2b4,Eif2c3,Eif2d,Eif3a,Eif3d,Eif3g,Eif3j,Eif3k,Eif4a1,Eif4a2,Eif4e2,Eif5b,Etf1,Farsa,Farsb,Gm15427,Gm6654,Gspt1,Hars,Hars2,Hbs1l,Ict1,Ighmbp2,Itgam,Lars,Mars,Mrp63,Mrpl1,Mrpl12,Mrpl14,Mrpl15,Mrpl16,Mrpl18,Mrpl20,Mrpl21,Mrpl22,Mrpl23,Mrpl28,Mrpl30,Mrpl32,…	NA	NA	NA	NA	NA	Aimp1,Cars2,Eef1a1,Eef1e1,Eif4a1,Eprs,Hars,Hars2,Mars,Mrpl1,Polg2,Rpl10a,Rpl12,Rpl22,Rpl3,Rpl41,Rps19,Rps26,Rps5,Rps7,Tars2,Vars	NA	NA	NA	NA	NA
GO Molecular Function	chemokine binding	1.73286e-103									2.86009e-35			Ccbp2,Ccr1,Ccr10,Ccr1l1,Ccr2,Ccr3,Ccr4,Ccr5,Ccr7,Ccr8,Cx3cr1,Cxcr2,Cxcr3,Cxcr4,Cxcr6,Cxcr7,Xcr1	NA	NA	NA	NA	NA	NA	NA	NA	Ccr1,Ccr1l1,Ccr2,Ccr3,Ccr5,Cxcr6,Xcr1	NA	NA
GO Molecular Function	chemokine receptor activity	2.37486e-104									1.61796e-35			Ccbp2,Ccr1,Ccr10,Ccr1l1,Ccr2,Ccr3,Ccr4,Ccr5,Ccr7,Ccr8,Cx3cr1,Cxcr2,Cxcr3,Cxcr4,Cxcr6,Cxcr7,Xcr1	NA	NA	NA	NA	NA	NA	NA	NA	Ccr1,Ccr1l1,Ccr2,Ccr3,Ccr5,Cxcr6,Xcr1	NA	NA
GO Molecular Function	GTP binding	0												9930111J21Rik1,9930111J21Rik2,Adssl1,Agap2,Ak3,Ak4,Arf1,Arf2,Arf4,Arf6,Arl11,Arl15,Arl3,Arl4a,Arl4c,Arl4d,Arl5b,Arl5c,Arl8a,Arl8b,Atl2,B230208H17Rik,Bms1,Diras2,Dock10,Dock2,Dock8,Eef1a1,Eef1a2,Eef2,Eefsec,Eftud2,Ehd1,Ehd2,Ehd4,Eif2b1,Eif5b,Eral1,Fkbp4,Gbp2,Gbp3,Gch1,Gem,Gimap1,Gimap3,Gimap4,Gimap5,Gimap6,Gimap7,Gimap9,Gm12185,Gm266,Gm5431,Gna11,Gna13,Gna14,Gna15,Gnai2,Gnaq,Gnaz,Gnl1,Gnl3,Grlf1,G…	NA	NA	NA	NA	NA	NA	NA	NA	NA	NA	NA
GO Molecular Function	guanyl ribonucleotide binding	0												9930111J21Rik1,9930111J21Rik2,Adssl1,Agap2,Ak3,Ak4,Arf1,Arf2,Arf4,Arf6,Arl11,Arl15,Arl3,Arl4a,Arl4c,Arl4d,Arl5b,Arl5c,Arl8a,Arl8b,Atl2,B230208H17Rik,Bms1,Diras2,Dock10,Dock2,Dock8,Eef1a1,Eef1a2,Eef2,Eefsec,Eftud2,Ehd1,Ehd2,Ehd4,Eif2b1,Eif5b,Eral1,Fkbp4,Gbp2,Gbp3,Gch1,Gem,Gimap1,Gimap3,Gimap4,Gimap5,Gimap6,Gimap7,Gimap9,Gm12185,Gm266,Gm5431,Gna11,Gna13,Gna14,Gna15,Gnai2,Gnaq,Gnaz,Gnl1,Gnl3,Grlf1,G…	NA	NA	NA	NA	NA	NA	NA	NA	NA	NA	NA
GO Molecular Function	interleukin-6 receptor binding	2.19131e-80												Adam17,Cntf,Erap1,Il6,Il6ra,Il6st,Zfp91	NA	NA	NA	NA	NA	NA	NA	NA	NA	NA	NA
GO Molecular Function	nucleotide binding	0												1810024B03Rik,2610528E23Rik,2810030E01Rik,4921513D23Rik,4932415M13Rik,5133401N09Rik,6030422M02Rik,9930111J21Rik1,9930111J21Rik2,A830007P12Rik,Aacs,Aars,Aars2,Aasdh,Aatk,Abca2,Abcb4,Abcb6,Abcb9,Abcc1,Abcc3,Abcc6,Abce1,Abcf1,Abt1,Acin1,Acly,Acsf2,Acsf3,Actg1,Actg2,Actl6a,Actr1a,Actr1b,Actr2,Acvr1b,Adcy10,Adcy2,Adh4,Adh5,Adrbk1,Adrbk2,Adssl1,Afg3l1,Agap2,Ak2,Ak3,Ak4,Ak8,Akt1,Akt3,Aldh5a1,Aldh9a1,Alp…	NA	NA	NA	NA	NA	NA	NA	NA	NA	NA	NA
GO Molecular Function	protein binding	0	0	0								0		0610037P05Rik,1110008J03Rik,1110034A24Rik,1190002H23Rik,1500010J02Rik,2300002M23Rik,2310014H01Rik,2310016C08Rik,2310047M10Rik,2410022L05Rik,2410091C18Rik,2510003E04Rik,2610301G19Rik,2900073G15Rik,AF251705,AI428936,Abat,Abcb9,Abi1,Ablim3,Acadm,Acan,Accn2,Acd,Ace,Acly,Acr,Actg1,Actl6a,Actn3,Actn4,Actr2,Acvr1b,Adam10,Adam15,Adam17,Adam9,Adamtsl4,Adc,Adcy10,Adcy2,Adh5,Adipoq,Adipor1,Adra2b,Adrb2,Adrb…	0610011L14Rik,0610037P05Rik,1190002H23Rik,2300002M23Rik,6720463M24Rik,Abcb10,Abcb9,Abcg1,Abi1,Ace,Actl6a,Acvr1b,Adam15,Add2,Adm2,Adssl1,Agt,Aif1,Ak3,Akt1,Ambn,Amd2,Angpt4,Apaf1,Aqp1,Arap1,Arhgdia,Asap1,Asns,Atf3,Atp1a2,Atp1b1,Atp5d,Atp6v1g2,Bach1,Baiap2l2,Bat1a,Batf3,Bbc3,Bcar1,Bcl6b,Bet1l,Birc2,Birc3,Birc5,Bmp7,Bop1,Cacna1a,Cacna1c,Camk2b,Capns1,Card9,Catsper4,Cbx4,Cbx7,Cby1,Ccbl1,Cchcr1,Ccnc,Cd…	0610037P05Rik,1110008J03Rik,1190002H23Rik,2310014H01Rik,2410076I21Rik,2510003E04Rik,2700078E11Rik,4933400A11Rik,5033414D02Rik,Aak1,Abca1,Abcg2,Abhd5,Abi1,Acadm,Acd,Ace,Actg1,Actr2,Actr3b,Adam10,Adam2,Adam9,Adamts1,Adamtsl4,Adc,Add1,Add2,Adora1,Adrb1,Adrb2,Adrb3,Agap2,Agl,Agrp,Agtpbp1,Agtr1a,Agtr1b,Aimp1,Aip,Akap4,Als2,Alx4,Ambra1,Amelx,Amph,Angpt1,Ankrd27,Anln,Anp32a,Antxr1,Anxa5,Apba1,Apbb3,Aph1…	NA	NA	NA	NA	NA	NA	NA	0610037P05Rik,1110008J03Rik,1190002H23Rik,1500010J02Rik,1810046J19Rik,2310014H01Rik,2310016C08Rik,2310047M10Rik,2410076I21Rik,2900073G15Rik,4933400A11Rik,5033414D02Rik,Aak1,Abca1,Abcb10,Abcb9,Abcg1,Abcg2,Abhd5,Acaca,Accn2,Acd,Ace,Acot9,Acp1,Acr,Actg1,Actl6a,Actn3,Actn4,Actr2,Actr3b,Adam19,Adam2,Adam9,Adamtsl4,Adc,Adcy10,Add1,Add2,Adipor1,Adipor2,Adm,Adm2,Adrb1,Adrb2,Adrb3,Adssl1,Aes,Agap2,Agrp,Ag…	NA
GO Molecular Function	purine nucleotide binding	0												1810024B03Rik,2610528E23Rik,4932415M13Rik,5133401N09Rik,6030422M02Rik,9930111J21Rik1,9930111J21Rik2,A830007P12Rik,Aacs,Aars,Aars2,Aasdh,Aatk,Abca2,Abcb4,Abcb6,Abcb9,Abcc1,Abcc3,Abcc6,Abce1,Abcf1,Acly,Acsf2,Acsf3,Actg1,Actg2,Actl6a,Actr1a,Actr1b,Actr2,Acvr1b,Adcy10,Adcy2,Adrbk1,Adrbk2,Adssl1,Afg3l1,Agap2,Ak2,Ak3,Ak4,Ak8,Akt1,Akt3,Alpk3,Amhr2,Apaf1,Aprt,Arf1,Arf2,Arf4,Arf6,Arl11,Arl15,Arl3,Arl4a,Ar…	NA	NA	NA	NA	NA	NA	NA	NA	NA	NA	NA
GO Molecular Function	purine ribonucleoside triphosphate binding	0												1810024B03Rik,2610528E23Rik,4932415M13Rik,5133401N09Rik,6030422M02Rik,9930111J21Rik1,9930111J21Rik2,A830007P12Rik,Aacs,Aars,Aars2,Aasdh,Aatk,Abca2,Abcb4,Abcb6,Abcb9,Abcc1,Abcc3,Abcc6,Abce1,Abcf1,Acly,Acsf2,Acsf3,Actg1,Actg2,Actl6a,Actr1a,Actr1b,Actr2,Acvr1b,Adcy10,Adcy2,Adrbk1,Adrbk2,Adssl1,Afg3l1,Agap2,Ak2,Ak3,Ak4,Ak8,Akt1,Akt3,Alpk3,Amhr2,Apaf1,Arf1,Arf2,Arf4,Arf6,Arl11,Arl15,Arl3,Arl4a,Arl4c,A…	NA	NA	NA	NA	NA	NA	NA	NA	NA	NA	NA
GO Molecular Function	purine ribonucleotide binding	0												1810024B03Rik,2610528E23Rik,4932415M13Rik,5133401N09Rik,6030422M02Rik,9930111J21Rik1,9930111J21Rik2,A830007P12Rik,Aacs,Aars,Aars2,Aasdh,Aatk,Abca2,Abcb4,Abcb6,Abcb9,Abcc1,Abcc3,Abcc6,Abce1,Abcf1,Acly,Acsf2,Acsf3,Actg1,Actg2,Actl6a,Actr1a,Actr1b,Actr2,Acvr1b,Adcy10,Adcy2,Adrbk1,Adrbk2,Adssl1,Afg3l1,Agap2,Ak2,Ak3,Ak4,Ak8,Akt1,Akt3,Alpk3,Amhr2,Apaf1,Aprt,Arf1,Arf2,Arf4,Arf6,Arl11,Arl15,Arl3,Arl4a,Ar…	NA	NA	NA	NA	NA	NA	NA	NA	NA	NA	NA
GO Molecular Function	ribonucleotide binding	0												1810024B03Rik,2610528E23Rik,4932415M13Rik,5133401N09Rik,6030422M02Rik,9930111J21Rik1,9930111J21Rik2,A830007P12Rik,Aacs,Aars,Aars2,Aasdh,Aatk,Abca2,Abcb4,Abcb6,Abcb9,Abcc1,Abcc3,Abcc6,Abce1,Abcf1,Acly,Acsf2,Acsf3,Actg1,Actg2,Actl6a,Actr1a,Actr1b,Actr2,Acvr1b,Adcy10,Adcy2,Adrbk1,Adrbk2,Adssl1,Afg3l1,Agap2,Ak2,Ak3,Ak4,Ak8,Akt1,Akt3,Alpk3,Amhr2,Apaf1,Aprt,Arf1,Arf2,Arf4,Arf6,Arl11,Arl15,Arl3,Arl4a,Ar…	NA	NA	NA	NA	NA	NA	NA	NA	NA	NA	NA
GO Molecular Function	structural constituent of ribosome	0												1110034A24Rik,2810422J05Rik,Gm15427,Gm6654,Itgam,Mrp63,Mrpl1,Mrpl12,Mrpl14,Mrpl15,Mrpl16,Mrpl18,Mrpl20,Mrpl21,Mrpl22,Mrpl23,Mrpl28,Mrpl30,Mrpl32,Mrpl35,Mrpl4,Mrpl41,Mrpl47,Mrpl55,Mrps10,Mrps11,Mrps15,Mrps16,Mrps18b,Mrps18c,Mrps22,Mrps23,Mrps24,Mrps7,Rpl10,Rpl11,Rpl13,Rpl14,Rpl17,Rpl19,Rpl22,Rpl23,Rpl26,Rpl27,Rpl27a,Rpl28,Rpl29,Rpl32,Rpl35,Rpl35a,Rpl36,Rpl36al,Rpl37a,Rpl38,Rpl4,Rpl41,Rpl6,Rpl7l1,R…	NA	NA	NA	NA	NA	NA	NA	NA	NA	NA	NA
MGI Expression: Detected	TS23 haemolymphoid system	0		0								0		1110034A24Rik,1110049F12Rik,1190002H23Rik,1700025G04Rik,1810019J16Rik,2010001M09Rik,5133401N09Rik,Aacs,Abat,Abcb9,Abce1,Abhd1,Acadl,Acap1,Actl6a,Ada,Adipor1,Adrbk2,Aes,Aff1,Agpat5,Agps,Aimp2,Ak2,Akna,Alox12e,Als2,Amd2,Ankrd13c,Ankrd6,Aqp11,Arhgap8,Arhgap9,Arhgdib,Arid1a,Arl11,Armc5,Arpc5l,Atad1,Atl2,Atp13a2,Atp5k,Atp7b,BC031781,BC037034,Birc2,Bri3bp,Brp44l,Camk2a,Cblc,Cbx1,Ccdc41,Ccl25,Ccl5,Ccr8,…	NA	1110049F12Rik,1110054O05Rik,1190002H23Rik,5033414D02Rik,5830405N20Rik,Abce1,Acsl4,Ada,Adrbk2,Aff1,Ak2,Akr1c12,Akr1c13,Als2,Alx3,Ankrd6,Apbb1ip,Apobec3,Aqp11,Arhgap9,Arl11,Arntl,Asb4,BC031781,BC037034,Birc2,Bmx,Bnip3l,C1galt1,C1qbp,Capzb,Casp6,Cd164,Cd200r1,Cd47,Cd52,Cd82,Cdh8,Cdkn1b,Cenph,Cep68,Chaf1b,Cirh1a,Cish,Clca1,Clca5,Cldn2,Comt,Coro2a,Cpb1,Cpt1a,Cr1l,Crlf3,Cryl1,Ctnnb1,Cyp3a11,Dapp1,Dctd,…	NA	NA	NA	NA	NA	NA	NA	1110049F12Rik,1190002H23Rik,1700025G04Rik,2010001M09Rik,2810405K02Rik,2810432L12Rik,4930430F08Rik,5033414D02Rik,5830405N20Rik,Aacs,Abcb9,Abcg1,Acaca,Acap1,Acp1,Acsl4,Acsl5,Actl6a,Ada,Adipor1,Adrbk2,Aes,Aff1,Agpat5,Aimp2,Ak2,Akna,Als2,Ankrd6,Ap1m2,Aqp11,Arhgap9,Arhgdib,Arntl,Asb4,Atp13a2,Atp8a1,BC031781,Bid,Birc2,Bmx,Bri3bp,Bspry,C1galt1,C1qbp,Capzb,Casp4,Casp7,Ccbl1,Ccl17,Ccl22,Ccr8,Cd200r1,Cd47,…	NA
MGI Expression: Detected	TS23 liver	0		0					0	0	2.70066e-258	0		1110034A24Rik,1110038D17Rik,1110049F12Rik,1190002H23Rik,1300001I01Rik,2610002D18Rik,3110003A17Rik,5730469M10Rik,Aadac,Abcb6,Acat2,Acat3,Acbd4,Actl6a,Adam10,Adipor1,Adrb2,Aff1,Agpat2,Agt,Ak2,Alas1,Amd2,Ankrd13c,Ankrd43,Apoa1,Apoa2,Apoe,Apom,Arl11,Art4,Atl2,Atp1b2,Atp5k,Atp7b,Axl,B2m,BC037034,Bpgm,Bri3bp,Btg2,Butr1,C1s,C2,C4b,C8g,Cadm3,Cd19,Cd34,Cd48,Cd5l,Cd68,Cd79a,Cd82,Cdca4,Cfb,Chek1,Chmp2a,Ciap…	NA	1110049F12Rik,1190002H23Rik,2010002N04Rik,2610002D18Rik,5730469M10Rik,Aadac,Abcb6,Acadvl,Acbd4,Acsl1,Acsl4,Acss2,Adam10,Adamts1,Add2,Adrb2,Aff1,Agpat2,Aimp1,Ak2,Akr1c13,Angpt1,Ankrd43,Apbb1ip,Arl11,Asb4,Asns,Atad5,Atp1b2,Atp6v1b2,Axl,B2m,BC021614,BC037034,Bbox1,Beta-s,Blvrb,Bmx,Bpgm,Btrc,C1galt1,C2,C3,C4b,Car2,Cd19,Cd200r1,Cd47,Cd68,Cd82,Cfb,Cited1,Cited2,Clca1,Clca5,Cldn13,Comt,Cr1l,Creb3l3,Creg…	NA	NA	NA	NA	1110003E01Rik,1110049F12Rik,5730469M10Rik,Aadac,Adcy9,Adipor2,Agpat2,Agpat3,Agt,Alox5ap,Angpt1,Beta-s,Bok,Cd48,Clec12a,Clec1b,Clec2d,Csf3r,Ctla2a,Dazap2,Eya2,F2rl2,F2rl3,F5,Fbxo9,Fggy,Fli1,Gmpr,Hbb-b1,Hmga1,Hmgcl,Ikzf1,Il4ra,Il6ra,Itgb3,Itpkb,Lgals9,Lipc,Lta,Ltbp1,Mafk,Micall2,Mrpl15,Ncf1,Pak1ip1,Parvb,Pde5a,Pik3r1,Plcg2,Pnpo,Polr1d,Prkcq,Psap,Rfx2,Rhd,Rnf181,Serpinb10-ps,Slain2,Slamf1,Slc17a3,Sp…	1110038D17Rik,5730469M10Rik,Aadac,Abcb6,Abcg4,Acp5,Add2,Adrb2,Ampd3,Apeh,Apom,Atp1b2,B2m,Beta-s,Blvrb,Bpgm,Cadm3,Car2,Cd47,Cldn13,Clint1,Clp1,Comt,Creb3l3,Csnk2b,Csrp1,Ctf1,Daam2,Dapp1,Ddhd1,Dennd4a,Dhrs11,Egr1,Ehhadh,Epb4.2,Ermap,Etfdh,Fam134a,Fam46c,Fam55b,Fbxo34,Fcnb,Fech,Foxo3,Frrs1,Gadd45a,Gata1,Gclm,Gfi1b,Gmpr,Haus1,Hbb-b1,Hbq1a,Hbq1b,Hemgn,Herc1,Hip1r,Hist1h1t,Hpd,Ifnar2,Ikzf1,Il2rb,Il4ra,…	1110049F12Rik,2010002N04Rik,2610002D18Rik,Aadac,Acsl1,Agfg2,Arrb1,Cadm3,Cd47,Cd82,Coasy,Cyp2d10,Cyp2d9,Dapp1,Dyrk3,Epor,Fzr1,Galk1,Gata1,Gfi1b,Gypc,Hemgn,Hmgcl,Il2rb,Inpp5b,Isca1,Itga2b,Lgals9,Lipc,Lyl1,Mafk,Mfsd2b,Micall2,Mknk1,Mpo,Mtmr3,Nfe2,Nipsnap1,Pank1,Prkar2b,Psap,Rcc2,Rcl1,Rhd,Runx1,Samd14,Selenbp1,Slc16a12,Spna1,Tfrc,Treml1,Uba7,Xrcc6	1110049F12Rik,1190002H23Rik,4930430F08Rik,5730469M10Rik,Aadac,Abcb6,Acaa2,Acbd4,Acot4,Acp1,Acp5,Acsl1,Acsl4,Acsl5,Acss2,Actl6a,Adcy9,Add2,Adipor1,Adipor2,Adrb2,Aff1,Agfg2,Agpat2,Agpat3,Ak2,Alad,Aldob,Amfr,Angpt1,Ankrd43,Ap2a1,Apoa1,Apoe,Aqp1,Arrb1,Art4,Asb4,Atad5,Atp6v1b2,Atp8a1,Axl,B2m,BC021614,Beta-s,Bid,Blvrb,Bmx,Bpgm,Bri3bp,Btg2,Butr1,C1galt1,C8g,Cadm3,Camsap1l1,Car2,Ccbl1,Cd19,Cd200r1,Cd47,C…	NA
MGI Expression: Detected	TS23 liver and biliary system	0		0					0	0	3.33285e-258	0		1110034A24Rik,1110038D17Rik,1110049F12Rik,1190002H23Rik,1300001I01Rik,2610002D18Rik,3110003A17Rik,5730469M10Rik,Aadac,Abcb6,Acat2,Acat3,Acbd4,Actl6a,Adam10,Adipor1,Adrb2,Aff1,Agpat2,Agt,Ak2,Alas1,Amd2,Ankrd13c,Ankrd43,Apoa1,Apoa2,Apoe,Apom,Arl11,Art4,Atl2,Atp1b2,Atp5k,Atp6v1b1,Atp7b,Axl,B2m,BC037034,Bpgm,Bri3bp,Btg2,Butr1,C1s,C2,C4b,C8g,Cadm3,Cd19,Cd34,Cd48,Cd5l,Cd68,Cd79a,Cd82,Cdca4,Cfb,Chek1,Ch…	NA	1110049F12Rik,1190002H23Rik,2010002N04Rik,2610002D18Rik,5730469M10Rik,Aadac,Abcb6,Acadvl,Acbd4,Acsl1,Acsl4,Acss2,Adam10,Adamts1,Add2,Adrb2,Aff1,Agpat2,Aimp1,Ak2,Akr1c13,Angpt1,Ankrd43,Apbb1ip,Arl11,Asb4,Asns,Atad5,Atp1b2,Atp6v1b2,Axl,B2m,BC021614,BC037034,Bbox1,Beta-s,Blvrb,Bmx,Bpgm,Btrc,C1galt1,C2,C3,C4b,Car2,Cd19,Cd200r1,Cd47,Cd68,Cd82,Cfb,Cited1,Cited2,Clca1,Clca5,Cldn13,Comt,Cr1l,Creb3l3,Creg…	NA	NA	NA	NA	1110003E01Rik,1110049F12Rik,5730469M10Rik,Aadac,Adcy9,Adipor2,Agpat2,Agpat3,Agt,Alox5ap,Angpt1,Beta-s,Bok,Cd48,Clec12a,Clec1b,Clec2d,Csf3r,Ctla2a,Dazap2,Eya2,F2rl2,F2rl3,F5,Fbxo9,Fggy,Fli1,Gmpr,Hbb-b1,Hmga1,Hmgcl,Ikzf1,Il4ra,Il6ra,Itgb3,Itpkb,Lgals9,Lipc,Lta,Ltbp1,Mafk,Micall2,Mrpl15,Ncf1,Pak1ip1,Parvb,Pde5a,Pik3r1,Plcg2,Pnpo,Polr1d,Prkcq,Psap,Rfx2,Rhd,Rnf181,Serpinb10-ps,Slain2,Slamf1,Slc17a3,Sp…	1110038D17Rik,5730469M10Rik,Aadac,Abcb6,Abcg4,Acp5,Add2,Adrb2,Ampd3,Apeh,Apom,Atp1b2,B2m,Beta-s,Blvrb,Bpgm,Cadm3,Car2,Cd47,Cldn13,Clint1,Clp1,Comt,Creb3l3,Csnk2b,Csrp1,Ctf1,Daam2,Dapp1,Ddhd1,Dennd4a,Dhrs11,Egr1,Ehhadh,Epb4.2,Ermap,Etfdh,Fam134a,Fam46c,Fam55b,Fbxo34,Fcnb,Fech,Foxo3,Frrs1,Gadd45a,Gata1,Gclm,Gfi1b,Gmpr,Haus1,Hbb-b1,Hbq1a,Hbq1b,Hemgn,Herc1,Hip1r,Hist1h1t,Hpd,Ifnar2,Ikzf1,Il2rb,Il4ra,…	1110049F12Rik,2010002N04Rik,2610002D18Rik,Aadac,Acsl1,Agfg2,Arrb1,Cadm3,Cd47,Cd82,Coasy,Cyp2d10,Cyp2d9,Dapp1,Dyrk3,Epor,Fzr1,Galk1,Gata1,Gfi1b,Gypc,Hemgn,Hmgcl,Il2rb,Inpp5b,Isca1,Itga2b,Lgals9,Lipc,Lyl1,Mafk,Mfsd2b,Micall2,Mknk1,Mpo,Mtmr3,Nfe2,Nipsnap1,Pank1,Prkar2b,Psap,Rcc2,Rcl1,Rhd,Runx1,Samd14,Selenbp1,Slc16a12,Spna1,Tfrc,Treml1,Uba7,Xrcc6	1110049F12Rik,1190002H23Rik,4930430F08Rik,5730469M10Rik,Aadac,Abcb6,Acaa2,Acbd4,Acot4,Acp1,Acp5,Acsl1,Acsl4,Acsl5,Acss2,Actl6a,Adcy9,Add2,Adipor1,Adipor2,Adrb2,Aff1,Agfg2,Agpat2,Agpat3,Ak2,Alad,Aldob,Amfr,Angpt1,Ankrd43,Ap2a1,Apoa1,Apoe,Aqp1,Arrb1,Art4,Asb4,Atad5,Atp6v1b2,Atp8a1,Axl,B2m,BC021614,Beta-s,Bid,Blvrb,Bmx,Bpgm,Bri3bp,Btg2,Butr1,C1galt1,C8g,Cadm3,Camsap1l1,Car2,Ccbl1,Cd19,Cd200r1,Cd47,C…	NA
MGI Expression: Detected	TS23 organ system; gland	0										0		1110034A24Rik,1110049F12Rik,1190002H23Rik,1300001I01Rik,1700025G04Rik,1810019J16Rik,2010001M09Rik,2810030E01Rik,4930486L24Rik,4930583H14Rik,5133401N09Rik,Aacs,Abat,Abcb9,Abce1,Abhd1,Abhd2,Acadl,Acap1,Acly,Actl6a,Ada,Adipor1,Adrbk2,Aes,Aff1,Agpat5,Agps,Aimp2,Ak2,Akna,Alas1,Alox12e,Als2,Amd2,Ankrd13c,Ankrd5,Ankrd6,Apc,Aqp11,Arhgap8,Arhgap9,Arhgdib,Arid1a,Arl11,Armc5,Arpc5l,Atad1,Atl2,Atp13a2,Atp5k,…	NA	NA	NA	NA	NA	NA	NA	NA	NA	1110049F12Rik,1190002H23Rik,1700025G04Rik,2010001M09Rik,2010109I03Rik,2810405K02Rik,2810432L12Rik,4930430F08Rik,5033414D02Rik,5830405N20Rik,Aacs,Abcb9,Abcg1,Abhd2,Acaca,Acap1,Acp1,Acsl4,Acsl5,Actl6a,Ada,Adipor1,Adrbk2,Aes,Aff1,Agpat5,Ahcyl2,Aimp2,Ak2,Akna,Aldh1l1,Als2,Ankrd6,Ap1m2,Appl2,Aqp11,Ar,Arhgap9,Arhgdib,Arntl,Asb4,Atp13a2,Atp6v1e1,Atp8a1,Axl,BC031781,Bid,Birc2,Bmx,Bri3bp,Bspry,C1galt1,C1q…	NA
MGI Expression: Detected	TS23 thymus primordium	0		0								0		1110034A24Rik,1110049F12Rik,1190002H23Rik,1700025G04Rik,1810019J16Rik,2010001M09Rik,5133401N09Rik,Aacs,Abat,Abcb9,Abce1,Abhd1,Acadl,Acap1,Actl6a,Ada,Adipor1,Adrbk2,Aes,Aff1,Agpat5,Agps,Aimp2,Ak2,Akna,Alox12e,Als2,Amd2,Ankrd13c,Ankrd6,Aqp11,Arhgap8,Arhgap9,Arhgdib,Arid1a,Arl11,Armc5,Arpc5l,Atad1,Atl2,Atp13a2,Atp5k,Atp7b,BC031781,BC037034,Birc2,Bri3bp,Brp44l,Camk2a,Cblc,Cbx1,Ccdc41,Ccl25,Ccl5,Ccr8,…	NA	1110049F12Rik,1110054O05Rik,1190002H23Rik,5033414D02Rik,5830405N20Rik,Abce1,Acsl4,Ada,Adrbk2,Aff1,Ak2,Akr1c12,Akr1c13,Als2,Alx3,Ankrd6,Apbb1ip,Apobec3,Aqp11,Arhgap9,Arl11,Arntl,Asb4,BC031781,BC037034,Birc2,Bmx,Bnip3l,C1galt1,C1qbp,Capzb,Casp6,Cd164,Cd200r1,Cd47,Cd52,Cd82,Cdh8,Cenph,Cep68,Chaf1b,Cirh1a,Cish,Clca1,Clca5,Cldn2,Comt,Coro2a,Cpb1,Cpt1a,Cr1l,Crlf3,Cryl1,Ctnnb1,Cyp3a11,Dapp1,Dctd,Dennd2c…	NA	NA	NA	NA	NA	NA	NA	1110049F12Rik,1190002H23Rik,1700025G04Rik,2010001M09Rik,2810405K02Rik,2810432L12Rik,4930430F08Rik,5033414D02Rik,5830405N20Rik,Aacs,Abcb9,Abcg1,Acaca,Acap1,Acp1,Acsl4,Acsl5,Actl6a,Ada,Adipor1,Adrbk2,Aes,Aff1,Agpat5,Aimp2,Ak2,Akna,Als2,Ankrd6,Ap1m2,Aqp11,Arhgap9,Arhgdib,Arntl,Asb4,Atp13a2,Atp8a1,BC031781,Bid,Birc2,Bmx,Bri3bp,Bspry,C1galt1,C1qbp,Capzb,Casp4,Casp7,Ccbl1,Ccl17,Ccl22,Ccr8,Cd200r1,Cd47,…	NA
MGI Expression: Detected	TS28 brain	0										0		0610031J06Rik,0910001L09Rik,1190005F20Rik,1810037I17Rik,2010111I01Rik,2610028H24Rik,3110003A17Rik,4732418C07Rik,4921513D23Rik,4932438H23Rik,6330407J23Rik,A830080D01Rik,A930004D18Rik,AB056442,Abcb6,Abcc1,Abhd1,Abhd14a,Abhd2,Abhd3,Abi1,Abt1,Acaa1a,Acadm,Acd,Ace,Acin1,Acox3,Actg1,Actl6a,Acvr1b,Ada,Adam10,Adam23,Adam33,Adamts10,Adamtsl4,Adcy10,Adcy2,Adipor1,Adora2b,Adra2b,Adrb2,Adrbk1,Adrbk2,Aes,Aff1…	NA	NA	NA	NA	NA	NA	NA	NA	NA	0610031J06Rik,1810008A18Rik,2610028H24Rik,2700094K13Rik,4732418C07Rik,6330407J23Rik,8430419L09Rik,Aak1,Abcb10,Abcb6,Abcc1,Abcg1,Abcg2,Abhd14a,Abhd2,Abhd5,Abtb1,Acaa1a,Acaca,Acd,Ace,Acin1,Acp1,Acsl4,Acss2,Acta1,Actg1,Actl6a,Ada,Adad2,Adam2,Adamts5,Adamtsl4,Adcy10,Adcy4,Adcy6,Adcy9,Adipor1,Adipor2,Adrb1,Adrb2,Adrb3,Adrbk2,Aes,Aff1,Aff3,Afg3l2,Agpat3,Agrp,Agtr1b,Aip,Ak2,Akna,Akt1,Alad,Alas2,Als2,Ang…	NA
MGI Expression: Detected	TS28 cardiovascular system	0		0								0		0610031J06Rik,1190005F20Rik,1700027D21Rik,2010111I01Rik,2610028H24Rik,4932438H23Rik,AB056442,Abcc6,Abhd1,Abhd2,Abi1,Abt1,Acadm,Acd,Ace,Acox3,Actn4,Acvr1b,Ada,Adam10,Adam33,Adamts10,Adamtsl4,Adck5,Adcy10,Adipor1,Adora2b,Adrb2,Adssl1,Aes,Aff1,Agtr1b,Ak2,Akap10,Akt1,Akt3,Alpk3,Angptl4,Apaf1,Apc,Apoe,Arhgdia,Arhgdib,Arl4d,Arvcf,Asph,Atad2,Atf3,Atn1,Atp11a,Atp1a2,Atp1b3,Atp2a2,Atp6v0a2,Atp6v0c,Atp6v0d…	NA	1190005F20Rik,1700027D21Rik,1810006K21Rik,1810008A18Rik,2610028H24Rik,4930447C04Rik,Abcc6,Abhd2,Abi1,Acadm,Acadvl,Acd,Ace,Acsl1,Acsl4,Acss2,Ada,Adam10,Adamts1,Adamts5,Adamtsl4,Adcy4,Adora1,Adra1a,Adrb1,Adrb2,Aff1,Agtpbp1,Agtr1a,Agtr1b,Aim1,Aimp1,Ak2,Alas2,Ankfy1,Ankrd27,Anp32b,Anxa5,Apbb1ip,Aqp8,Arl4d,Arntl,Arvcf,Asap1,Asb2,Aspn,Asxl1,Atp2b1,Atp5f1,Atp6v0d1,Atp6v1b2,Atp7a,Axl,B3galt4,B3gnt2,B4gal…	NA	NA	NA	NA	NA	NA	NA	0610031J06Rik,1700027D21Rik,1810008A18Rik,2610028H24Rik,2700094K13Rik,Abcb10,Abcc6,Abcc9,Abcg1,Abhd2,Acaca,Acd,Ace,Acsl1,Acsl4,Acsl5,Acss2,Acta1,Actn4,Ada,Adamts5,Adamtsl4,Adck5,Adcy10,Adcy4,Adipor1,Adipor2,Adrb1,Adrb2,Adssl1,Aes,Aff1,Agpat3,Agtr1b,Ak2,Akt1,Alas2,Alpk3,Angptl4,Ankfy1,Ankrd27,Ankrd54,Anp32b,Apoe,Aqp1,Arhgdib,Arl4d,Arntl,Arvcf,Asap1,Asph,Aspn,Atad2,Atf3,Atp1a2,Atp1b3,Atp5f1,Atp5o,A…	NA
MGI Expression: Detected	TS28 central nervous system	0										0		0610031J06Rik,0910001L09Rik,1190005F20Rik,1190005I06Rik,1810009A15Rik,1810037I17Rik,2010111I01Rik,2310037I24Rik,2610028H24Rik,2610301G19Rik,2900064A13Rik,3110003A17Rik,4732418C07Rik,4921513D23Rik,4932438H23Rik,6330407J23Rik,A830080D01Rik,A930004D18Rik,AB056442,Abcb6,Abcc1,Abhd1,Abhd14a,Abhd2,Abhd3,Abi1,Abt1,Acaa1a,Acadm,Acd,Ace,Acin1,Acox3,Actg1,Actl6a,Acvr1b,Ada,Adam10,Adam23,Adam33,Adamts10,Ada…	NA	NA	NA	NA	NA	NA	NA	NA	NA	0610031J06Rik,1190005I06Rik,1810008A18Rik,1810009A15Rik,1810020D17Rik,2310067B10Rik,2610028H24Rik,2700094K13Rik,4732418C07Rik,6330407J23Rik,8430419L09Rik,Aak1,Abcb10,Abcb6,Abcc1,Abcg1,Abcg2,Abhd14a,Abhd2,Abhd5,Abtb1,Acaa1a,Acaca,Acd,Ace,Acin1,Acp1,Acsl4,Acss2,Acta1,Actg1,Actl6a,Ada,Adad2,Adam2,Adamts5,Adamtsl4,Adcy10,Adcy4,Adcy6,Adcy9,Adipor1,Adipor2,Adrb1,Adrb2,Adrb3,Adrbk2,Aes,Aff1,Aff3,Afg3l2,…	NA
MGI Expression: Detected	TS28 haemolymphoid system	0		0								0		0610031J06Rik,1190005F20Rik,1700027D21Rik,2010111I01Rik,2610028H24Rik,4932438H23Rik,AB056442,Abhd2,Abhd3,Abi1,Abt1,Acd,Ace,Acvr1b,Ada,Adam33,Adamts10,Adamtsl2,Adamtsl4,Adcy10,Adipoq,Adipor1,Aes,Aff1,Aff3,Agrp,Ak2,Akap10,Akt1,Akt3,Amh,Angptl4,Apc,Apoe,Arhgdib,Arvcf,Atad2,Atf3,Atn1,Atp10a,Atp11a,Atp1b3,Atp6v0a2,Atp6v0c,Atp6v0d1,Atp6v1b1,Atp6v1c1,Atp7a,Atp8a2,Aurkb,Axl,B3galt4,B4galt1,B4galt5,BC0148…	NA	1190005F20Rik,1700027D21Rik,1810006K21Rik,1810008A18Rik,2610028H24Rik,Abca3,Abhd2,Abi1,Acadvl,Acd,Ace,Ada,Adam2,Adam21,Adamts1,Adamts5,Adamtsl4,Adcy4,Adrb1,Aff1,Aff3,Agrp,Aim1,Ak2,Alas2,Ankfy1,Ankrd27,Anxa5,Apbb1ip,Aqp8,Arvcf,Asap1,Aspn,Atp6v0d1,Atp6v1b2,Atp7a,Axl,B3galt4,B3gnt2,B4galt1,Bach1,Bcas3,Bcl10,Bcl11a,Becn1,Beta-s,Bmp5,Bmx,C2,C3,C4b,Cacna1c,Cacng4,Calu,Cap1,Cask,Cbfa2t3,Ccdc50,Ccnb1,Ccn…	NA	NA	NA	NA	NA	NA	NA	0610031J06Rik,1700027D21Rik,1810008A18Rik,2610028H24Rik,2700094K13Rik,Abcb10,Abcg1,Abhd2,Acaca,Acd,Ace,Acta1,Ada,Adam2,Adamts5,Adamtsl4,Adcy10,Adcy4,Adipor1,Adipor2,Adrb1,Aes,Aff1,Aff3,Agpat3,Agrp,Ak2,Akt1,Alad,Alas2,Angptl4,Ankfy1,Ankrd27,Ankrd54,Apoe,Aqp1,Arhgdib,Arvcf,Asap1,Aspn,Atad2,Atf3,Atf7ip,Atm,Atp1b3,Atp5o,Atp6v0b,Atp6v0d1,Atp6v1b2,Atp7a,Atp8a1,Aurkb,Avpr1b,Axl,B3galt2,B3gnt2,B4galt1,B4…	NA
MGI Expression: Detected	TS28 heart	0		0								0		0610031J06Rik,1190005F20Rik,1700027D21Rik,2010111I01Rik,2610028H24Rik,4932438H23Rik,AB056442,Abhd1,Abhd2,Abi1,Abt1,Acadm,Acd,Ace,Acox3,Actn4,Acvr1b,Ada,Adam10,Adam33,Adamts10,Adamtsl4,Adck5,Adcy10,Adipor1,Adora2b,Adrb2,Adssl1,Aes,Aff1,Agtr1b,Ak2,Akap10,Akt1,Akt3,Alpk3,Angptl4,Apaf1,Apc,Apoe,Arhgdia,Arhgdib,Arl4d,Arvcf,Asph,Atad2,Atf3,Atn1,Atp11a,Atp1a2,Atp1b3,Atp2a2,Atp6v0a2,Atp6v0c,Atp6v0d1,Atp6…	NA	1190005F20Rik,1700027D21Rik,1810006K21Rik,1810008A18Rik,2610028H24Rik,4930447C04Rik,Abhd2,Abi1,Acadm,Acadvl,Acd,Ace,Acsl1,Acsl4,Acss2,Ada,Adam10,Adamts1,Adamts5,Adamtsl4,Adcy4,Adora1,Adra1a,Adrb1,Adrb2,Aff1,Agtpbp1,Agtr1a,Agtr1b,Aim1,Aimp1,Ak2,Alas2,Ankfy1,Ankrd27,Anp32b,Anxa5,Apbb1ip,Aqp8,Arl4d,Arntl,Arvcf,Asap1,Asb2,Aspn,Asxl1,Atp2b1,Atp5f1,Atp6v0d1,Atp6v1b2,Atp7a,Axl,B3galt4,B3gnt2,B4galt1,Bac…	NA	NA	NA	NA	NA	NA	NA	0610031J06Rik,1700027D21Rik,1810008A18Rik,2610028H24Rik,2700094K13Rik,Abcb10,Abcc9,Abcg1,Abhd2,Acaca,Acd,Ace,Acsl1,Acsl4,Acsl5,Acss2,Acta1,Actn4,Ada,Adamts5,Adamtsl4,Adck5,Adcy10,Adcy4,Adipor1,Adipor2,Adrb1,Adrb2,Adssl1,Aes,Aff1,Agpat3,Agtr1b,Ak2,Akt1,Alas2,Alpk3,Angptl4,Ankfy1,Ankrd27,Ankrd54,Anp32b,Apoe,Arhgdib,Arl4d,Arntl,Arvcf,Asap1,Asph,Aspn,Atad2,Atf3,Atp1a2,Atp1b3,Atp5f1,Atp5o,Atp6v0b,Atp6…	NA
MGI Expression: Detected	TS28 kidney	0										0		0610031J06Rik,1190005F20Rik,2010111I01Rik,2610028H24Rik,4932438H23Rik,AB056442,Abhd1,Abhd2,Abhd3,Abi1,Abt1,Acadm,Acd,Ace,Acox3,Acvr1b,Ada,Adam10,Adam33,Adamts10,Adamtsl4,Adipor1,Adora2b,Aes,Aff1,Agrp,Agt,Agtr1b,Ak2,Akap10,Akt1,Akt3,Amh,Anapc11,Angptl4,Ankrd10,Apc,Apoe,Apom,Arhgdib,Arhgef7,Arl4d,Arvcf,Atad2,Atf3,Atn1,Atp10a,Atp11a,Atp1b3,Atp6v0a2,Atp6v0c,Atp6v0d1,Atp6v1b1,Atp6v1c1,Atp7a,Aurkb,Axl,…	NA	NA	NA	NA	NA	NA	NA	NA	NA	0610031J06Rik,1810008A18Rik,2610028H24Rik,2700094K13Rik,Abcb10,Abcg1,Abhd2,Acaca,Acd,Ace,Acsl4,Acss2,Acta1,Ada,Adam2,Adamts5,Adamtsl4,Adcy4,Adipor1,Adipor2,Adrb1,Aes,Aff1,Agpat3,Agrp,Agtr1b,Ak2,Akt1,Alad,Alas2,Aldh1l1,Angpt1,Angptl4,Ankfy1,Ankrd27,Ankrd54,Apoe,Aqp1,Aqp3,Aqp7,Arhgdib,Arhgdig,Arhgef7,Arl4d,Arntl,Arvcf,Asap1,Aspn,Atad2,Atf3,Atm,Atp1b3,Atp5o,Atp6v0b,Atp6v0d1,Atp6v1b2,Atp6v1e1,Atp7a,A…	NA
MGI Expression: Detected	TS28 liver	0		0								0		0610031J06Rik,1190005F20Rik,2010111I01Rik,AB056442,Abcc6,Abhd1,Abhd2,Abhd3,Abi1,Abt1,Acaa1a,Acadm,Acd,Acvr1b,Ada,Adam10,Adam33,Adamts10,Adamtsl2,Adamtsl4,Adcy10,Adh5,Adipor1,Adrb2,Aes,Aff1,Agt,Agtr1b,Ahcy,Ak2,Akap10,Akt1,Akt3,Alas1,Aldh1a1,Amh,Angptl4,Apaf1,Apc,Apoa1,Apoc1,Apoc4,Apoe,Arhgdib,Arhgef18,Arhgef7,Arl4d,Arvcf,Atad2,Atf3,Atn1,Atp11a,Atp1b3,Atp5d,Atp6v0a2,Atp6v0c,Atp6v0d1,Atp6v1b1,Atp6v1…	NA	1190005F20Rik,1810006K21Rik,1810008A18Rik,4930447C04Rik,Abca3,Abcc6,Abhd2,Abi1,Acadm,Acadvl,Acd,Acsbg1,Acsl4,Acss2,Ada,Adam10,Adam21,Adamts1,Adamts5,Adamtsl4,Adcy4,Adora1,Adrb1,Adrb2,Aff1,Agl,Agtpbp1,Agtr1a,Agtr1b,Aim1,Aimp1,Ak2,Alas2,Aldh1l1,Ankfy1,Ankrd27,Anxa5,Apbb1ip,Aqp7,Aqp8,Aqp9,Arhgef12,Arhgef18,Arhgef6,Arhgef7,Arl4d,Arntl,Arvcf,Asap1,Atp5d,Atp6v0d1,Atp6v1b2,Atp7a,Atp8b1,Axl,B2m,B3galt4,B…	NA	NA	NA	NA	NA	NA	NA	0610031J06Rik,1810008A18Rik,2700094K13Rik,Abcb10,Abcc6,Abcg1,Abhd2,Acaa1a,Acaca,Acacb,Acd,Acsl4,Acss2,Acta1,Ada,Adamts5,Adamtsl4,Adcy10,Adcy4,Adipor1,Adipor2,Adrb1,Adrb2,Aes,Aff1,Agpat3,Agtr1b,Ak2,Akt1,Alad,Alas2,Aldh1l1,Angptl4,Ankfy1,Ankrd27,Ankrd54,Apoa1,Apoc1,Apoc4,Apoe,Aqp7,Aqp9,Arhgdib,Arhgef12,Arhgef18,Arhgef6,Arhgef7,Arl4d,Arntl,Arvcf,Asap1,Atad2,Atf3,Atm,Atp1b3,Atp5o,Atp6v0b,Atp6v0d1,Atp…	NA
MGI Expression: Detected	TS28 liver and biliary system	0		0								0		0610031J06Rik,1190005F20Rik,2010111I01Rik,AB056442,Abcc6,Abhd1,Abhd2,Abhd3,Abi1,Abt1,Acaa1a,Acadm,Acd,Ace,Acvr1b,Ada,Adam10,Adam33,Adamts10,Adamtsl2,Adamtsl4,Adcy10,Adh5,Adipor1,Adora2b,Adrb2,Aes,Aff1,Agt,Agtr1b,Ahcy,Ak2,Akap10,Akt1,Akt3,Alas1,Aldh1a1,Amh,Angptl4,Apaf1,Apc,Apoa1,Apoc1,Apoc4,Apoe,Arhgdib,Arhgef18,Arhgef7,Arl4d,Arvcf,Atad2,Atf3,Atn1,Atp11a,Atp1b3,Atp5d,Atp6v0a2,Atp6v0c,Atp6v0d1,Atp…	NA	1190005F20Rik,1810006K21Rik,1810008A18Rik,4930447C04Rik,Abca3,Abcc6,Abhd2,Abi1,Acadm,Acadvl,Acd,Ace,Acsbg1,Acsl4,Acss2,Ada,Adam10,Adam21,Adamts1,Adamts5,Adamtsl4,Adcy4,Adora1,Adrb1,Adrb2,Aff1,Agl,Agtpbp1,Agtr1a,Agtr1b,Aim1,Aimp1,Ak2,Alas2,Aldh1l1,Ankfy1,Ankrd27,Anxa5,Apbb1ip,Aqp7,Aqp8,Aqp9,Arhgef12,Arhgef18,Arhgef6,Arhgef7,Arl4d,Arntl,Arvcf,Asap1,Atp5d,Atp6v0d1,Atp6v1b2,Atp7a,Atp8b1,Axl,B2m,B3gal…	NA	NA	NA	NA	NA	NA	NA	0610031J06Rik,1810008A18Rik,2700094K13Rik,Abcb10,Abcc6,Abcg1,Abhd2,Acaa1a,Acaca,Acacb,Acd,Ace,Acsl4,Acss2,Acta1,Ada,Adamts5,Adamtsl4,Adcy10,Adcy4,Adipor1,Adipor2,Adrb1,Adrb2,Aes,Aff1,Agpat3,Agtr1b,Ak2,Akt1,Alad,Alas2,Aldh1l1,Angptl4,Ankfy1,Ankrd27,Ankrd54,Apoa1,Apoc1,Apoc4,Apoe,Aqp7,Aqp9,Arhgdib,Arhgef12,Arhgef18,Arhgef6,Arhgef7,Arl4d,Arntl,Arvcf,Asap1,Atad2,Atf3,Atm,Atp1b3,Atp5o,Atp6v0b,Atp6v0d1…	NA
MGI Expression: Detected	TS28 lung	0		0								0		0610031J06Rik,1190005F20Rik,2010111I01Rik,2610028H24Rik,4932438H23Rik,AB056442,Abhd1,Abhd2,Abhd3,Abi1,Abt1,Acadm,Acd,Ace,Acox3,Acvr1b,Ada,Adam10,Adam33,Adamtsl2,Adamtsl4,Adcy10,Adipor1,Aes,Aff1,Aff3,Agrp,Agtr1b,Ak2,Akap10,Akt1,Akt3,Amh,Angptl4,Apc,Apoe,Arhgdib,Arl4d,Arvcf,Atad2,Atf3,Atn1,Atp11a,Atp1b3,Atp6v0a2,Atp6v0c,Atp6v0d1,Atp6v1b1,Atp6v1c1,Atp7a,Aurkb,Axl,B4galt1,B4galt5,BC014805,BC100451,Ba…	NA	1190005F20Rik,1810006K21Rik,1810008A18Rik,2610028H24Rik,4930447C04Rik,Abca3,Abhd2,Abi1,Acadm,Acadvl,Acd,Ace,Acsbg1,Acss2,Ada,Adam10,Adam21,Adamts1,Adamts5,Adamtsl4,Adcy4,Adora1,Adrb1,Aff1,Aff3,Agrp,Agtr1a,Agtr1b,Aim1,Ak2,Alas2,Ankfy1,Ankrd27,Anxa5,Apbb1ip,Aqp5,Aqp8,Arhgdig,Arl4d,Arntl,Arvcf,Asap1,Aspn,Asxl1,Atp6v0d1,Atp6v1b2,Atp7a,Axl,B3gnt2,B4galt1,Bcas3,Bcl10,Bcl11a,Bex1,Bik,Blk,Bmp5,Bmx,Cacna1…	NA	NA	NA	NA	NA	NA	NA	0610031J06Rik,1810008A18Rik,2610028H24Rik,2700094K13Rik,Abcg1,Abhd2,Acaca,Acd,Ace,Acss2,Acta1,Ada,Adamts5,Adamtsl4,Adcy10,Adcy4,Adipor1,Adipor2,Adrb1,Aes,Aff1,Aff3,Agpat3,Agrp,Agtr1b,Ak2,Akt1,Alad,Alas2,Angptl4,Ankfy1,Ankrd27,Apoe,Arhgdib,Arhgdig,Arl4d,Arntl,Arvcf,Asap1,Aspn,Atad2,Atf3,Atm,Atp1b3,Atp5o,Atp6v0b,Atp6v0d1,Atp6v1b2,Atp7a,Atp8a1,Aurkb,Avpr1b,Axl,B3galt2,B3gnt2,B4galt1,B4galt5,Bak1,Bap…	NA
MGI Expression: Detected	TS28 nervous system	0										0		0610031J06Rik,0910001L09Rik,1190005F20Rik,1190005I06Rik,1810009A15Rik,1810037I17Rik,2010111I01Rik,2310037I24Rik,2610028H24Rik,2610301G19Rik,2900064A13Rik,3110003A17Rik,4732418C07Rik,4921513D23Rik,4932438H23Rik,6330407J23Rik,A830080D01Rik,A930004D18Rik,AB056442,Abcb6,Abcc1,Abhd1,Abhd14a,Abhd2,Abhd3,Abi1,Abt1,Acaa1a,Acadm,Acd,Ace,Acin1,Acox3,Actg1,Actl6a,Acvr1b,Ada,Adam10,Adam23,Adam33,Adamts10,Ada…	NA	NA	NA	NA	NA	NA	NA	NA	NA	0610031J06Rik,1190005I06Rik,1810008A18Rik,1810009A15Rik,1810020D17Rik,2310067B10Rik,2610028H24Rik,2700094K13Rik,4732418C07Rik,6330407J23Rik,8430419L09Rik,Aak1,Abcb10,Abcb6,Abcc1,Abcg1,Abcg2,Abhd14a,Abhd2,Abhd5,Abtb1,Acaa1a,Acaca,Acd,Ace,Acin1,Acp1,Acsl4,Acss2,Acta1,Actg1,Actl6a,Ada,Adad2,Adam2,Adamts5,Adamtsl4,Adcy10,Adcy4,Adcy6,Adcy9,Adipor1,Adipor2,Adrb1,Adrb2,Adrb3,Adrbk2,Aes,Aff1,Aff3,Afg3l2,…	NA
MGI Expression: Detected	TS28 organ system	0										0		0610031J06Rik,0910001L09Rik,1190005F20Rik,1190005I06Rik,1700027D21Rik,1810009A15Rik,1810037I17Rik,2010111I01Rik,2310037I24Rik,2310043J07Rik,2410004B18Rik,2610028H24Rik,2610301G19Rik,2610305D13Rik,2900064A13Rik,3110003A17Rik,4732418C07Rik,4921513D23Rik,4930420K17Rik,4930583H14Rik,4932438H23Rik,6330407J23Rik,A630095E13Rik,A830080D01Rik,A930004D18Rik,AB056442,AI316807,Abca2,Abcb6,Abcc1,Abcc6,Abhd1,A…	NA	NA	NA	NA	NA	NA	NA	NA	NA	0610031J06Rik,1190005I06Rik,1700027D21Rik,1810008A18Rik,1810009A15Rik,1810020D17Rik,2310043J07Rik,2310067B10Rik,2410004B18Rik,2610028H24Rik,2700094K13Rik,4732418C07Rik,6330407J23Rik,8430419L09Rik,Aak1,Abca2,Abcb10,Abcb6,Abcc1,Abcc6,Abcc9,Abcg1,Abcg2,Abhd14a,Abhd2,Abhd5,Abtb1,Acaa1a,Acaca,Acacb,Acd,Ace,Acin1,Acp1,Acr,Acsl1,Acsl4,Acsl5,Acss2,Acta1,Actg1,Actl6a,Actn3,Actn4,Ada,Adad2,Adam2,Adam9,Adam…	NA
MGI Expression: Detected	TS28 renal/urinary system	0										0		0610031J06Rik,1190005F20Rik,2010111I01Rik,2310043J07Rik,2610028H24Rik,4932438H23Rik,AB056442,Abcc6,Abhd1,Abhd2,Abhd3,Abi1,Abt1,Acadm,Acd,Ace,Acox3,Acvr1b,Ada,Adam10,Adam33,Adamts10,Adamtsl4,Adipor1,Adora2b,Aes,Aff1,Agrp,Agt,Agtr1b,Ak2,Akap10,Akt1,Akt3,Amh,Anapc11,Angptl4,Ankrd10,Apc,Apoe,Apom,Arhgdib,Arhgef7,Arl4d,Arvcf,Atad2,Atf3,Atn1,Atp10a,Atp11a,Atp1b3,Atp6v0a2,Atp6v0c,Atp6v0d1,Atp6v1b1,Atp6v…	NA	NA	NA	NA	NA	NA	NA	NA	NA	0610031J06Rik,1810008A18Rik,2310043J07Rik,2610028H24Rik,2700094K13Rik,Abcb10,Abcc6,Abcg1,Abhd2,Acaca,Acd,Ace,Acsl4,Acss2,Acta1,Ada,Adam2,Adamts5,Adamtsl4,Adcy4,Adipor1,Adipor2,Adrb1,Aes,Aff1,Agpat3,Agrp,Agtr1b,Ak2,Akt1,Alad,Alas2,Aldh1l1,Angpt1,Angptl4,Ankfy1,Ankrd27,Ankrd54,Apoe,Aqp1,Aqp3,Aqp7,Arhgdib,Arhgdig,Arhgef7,Arl4d,Arntl,Arvcf,Asap1,Aspn,Atad2,Atf3,Atm,Atp1b3,Atp5o,Atp6v0b,Atp6v0d1,Atp6v…	NA
MGI Expression: Detected	TS28 reproductive system	0												1190005F20Rik,1700027D21Rik,2010111I01Rik,2610028H24Rik,2610305D13Rik,4932438H23Rik,A630095E13Rik,AB056442,AI316807,Abhd1,Abhd2,Abhd3,Abi1,Abt1,Acadm,Acd,Ace,Acin1,Acox3,Acr,Acrv1,Actn3,Acvr1b,Ada,Adam33,Adamts10,Adamtsl4,Adcy10,Adh5,Adipor1,Adora2b,Adrb2,Adrbk1,Aes,Aff1,Agrp,Agt,Agtr1b,Ak2,Akap10,Akt1,Aldh1a1,Amd2,Amh,Angptl4,Apbb2,Apc,Apoe,Arf2,Arhgdib,Arhgef18,Arhgef7,Arid1a,Arid3a,Arl4d,Arvcf…	NA	NA	NA	NA	NA	NA	NA	NA	NA	NA	NA
MGI Expression: Detected	TS28 respiratory system	0		0								0		0610031J06Rik,1190005F20Rik,2010111I01Rik,2610028H24Rik,4932438H23Rik,AB056442,Abcc6,Abhd1,Abhd2,Abhd3,Abi1,Abt1,Acadm,Acan,Acd,Ace,Acox3,Acvr1b,Ada,Adam10,Adam33,Adamtsl2,Adamtsl4,Adcy10,Adipor1,Aes,Aff1,Aff3,Agrp,Agtr1b,Ak2,Akap10,Akt1,Akt3,Amh,Angptl4,Apc,Apoe,Arhgdib,Arl4d,Arvcf,Atad2,Atf3,Atn1,Atp11a,Atp1b3,Atp6v0a2,Atp6v0c,Atp6v0d1,Atp6v1b1,Atp6v1c1,Atp7a,Aurkb,Axl,B4galt1,B4galt5,BC014805,…	NA	1190005F20Rik,1810006K21Rik,1810008A18Rik,2610028H24Rik,4930447C04Rik,Abca3,Abcc6,Abhd2,Abi1,Acadm,Acadvl,Acd,Ace,Acsbg1,Acss2,Ada,Adam10,Adam21,Adamts1,Adamts5,Adamtsl4,Adcy4,Adora1,Adrb1,Aff1,Aff3,Agrp,Agtr1a,Agtr1b,Aim1,Ak2,Alas2,Ankfy1,Ankrd27,Anxa5,Apbb1ip,Aqp5,Aqp8,Arhgdig,Arl4d,Arntl,Arvcf,Asap1,Aspn,Asxl1,Atp6v0d1,Atp6v1b2,Atp7a,Axl,B3gnt2,B4galt1,Bcas3,Bcl10,Bcl11a,Bex1,Bik,Blk,Bmp5,Bmx,…	NA	NA	NA	NA	NA	NA	NA	0610031J06Rik,1810008A18Rik,2610028H24Rik,2700094K13Rik,Abcc6,Abcg1,Abhd2,Acaca,Acd,Ace,Acss2,Acta1,Ada,Adamts5,Adamtsl4,Adcy10,Adcy4,Adipor1,Adipor2,Adrb1,Aes,Aff1,Aff3,Agpat3,Agrp,Agtr1b,Ak2,Akt1,Alad,Alas2,Angptl4,Ankfy1,Ankrd27,Apoe,Arhgdib,Arhgdig,Arl4d,Arntl,Arvcf,Asap1,Aspn,Atad2,Atf3,Atm,Atp1b3,Atp5o,Atp6v0b,Atp6v0d1,Atp6v1b2,Atp7a,Atp8a1,Aurkb,Avpr1b,Axl,B3galt2,B3gnt2,B4galt1,B4galt5,Ba…	NA
MGI Expression: Detected	TS28 skeletal muscle	0		0								0		2010111I01Rik,AB056442,Abhd1,Abhd2,Abhd3,Abi1,Abt1,Acadm,Ace,Acrv1,Acvr1b,Ada,Adam33,Adipor1,Adssl1,Aes,Aff1,Ak2,Akap10,Akt1,Akt3,Alpk3,Angptl4,Apc,Apoe,Arhgdib,Arvcf,Atf3,Atn1,Atp11a,Atp1a2,Atp1b2,Atp1b3,Atp2a1,Atp2a2,Atp6v0a2,Atp6v0c,Atp6v0d1,Atp6v1b1,Atp6v1c1,Aurkb,Axl,B4galt1,BC014805,Bag1,Bak1,Bap1,Bax,Bcam,Bcl10,Braf,Brca2,Brsk1,Btg2,Btnl2,C730048C13Rik,Cacna1c,Cacna1s,Cacng4,Calr,Cap1,Casp…	NA	1810006K21Rik,4930447C04Rik,Abhd2,Abi1,Acadm,Acadvl,Ace,Ada,Adam2,Adam21,Adamts5,Adcy4,Adora1,Adrb1,Aff1,Ak2,Alas2,Anxa5,Apbb1ip,Aqp8,Arntl,Arvcf,Asap1,Asb2,Aspn,Asxl1,Atp1b2,Atp6v0d1,Atp6v1b2,Axl,B3gnt2,B4galt1,Bach1,Bcl10,Bicd1,Cacna1c,Cacna1s,Cacng4,Calu,Cap1,Ccnb1,Ccnd2,Ccr1l1,Ccr2,Ccr5,Ccr7,Ccrl2,Cd2,Cd247,Cd276,Cd38,Cd44,Cd47,Cd55,Cd97,Cd99l2,Cdh23,Cdk11b,Cdx2,Chst3,Cib1,Cib3,Clca5,Clec4d,C…	NA	NA	NA	NA	NA	NA	NA	2700094K13Rik,Abcg1,Abhd2,Ace,Acta1,Ada,Adam2,Adamts5,Adcy4,Adipor1,Adipor2,Adrb1,Adssl1,Aes,Aff1,Ak2,Akt1,Alas2,Alpk3,Angptl4,Apoe,Arhgdib,Arntl,Arvcf,Asap1,Aspn,Atf3,Atp1a2,Atp1b3,Atp6v0b,Atp6v0d1,Atp6v1b2,Atp8a1,Aurkb,Avpr1b,Axl,B3galt2,B3gnt2,B4galt1,Bach1,Bak1,Bap1,Bax,Baz1b,Bcam,Bcar1,Bcl10,Brsk1,Btg2,Btnl2,Cacna1s,Calr,Cap1,Casp12,Casp9,Ccna2,Ccnb1,Ccnd2,Ccr1l1,Ccr2,Ccr5,Ccr7,Ccrl2,Cd247,C…	NA
MGI Expression: Detected	TS28 spleen	0		0								0		0610031J06Rik,1190005F20Rik,2010111I01Rik,AB056442,Abhd2,Abhd3,Abi1,Abt1,Acd,Ace,Acvr1b,Ada,Adam33,Adamts10,Adamtsl2,Adamtsl4,Adcy10,Adipor1,Aes,Aff1,Aff3,Agrp,Ak2,Akap10,Akt1,Akt3,Amh,Angptl4,Apc,Apoe,Arhgdib,Arvcf,Atad2,Atf3,Atn1,Atp1b3,Atp6v0a2,Atp6v0c,Atp6v0d1,Atp6v1b1,Atp6v1c1,Atp7a,Aurkb,Axl,B3galt4,B4galt1,B4galt5,BC014805,BC100451,Bag1,Bak1,Bap1,Bard1,Bax,Bcam,Bcas3,Bcl10,Bcl11a,Becn1,Bmp…	NA	1190005F20Rik,1810006K21Rik,Abca3,Abhd2,Abi1,Acd,Ace,Ada,Adam2,Adam21,Adamts5,Adamtsl4,Adcy4,Adrb1,Aff1,Aff3,Agrp,Aim1,Ak2,Alas2,Ankrd27,Anxa5,Apbb1ip,Aqp8,Arvcf,Asap1,Atp6v0d1,Atp6v1b2,Atp7a,Axl,B3galt4,B3gnt2,B4galt1,Bach1,Bcas3,Bcl10,Bcl11a,Becn1,Bmp5,Bmx,C2,C3,C4b,Cacna1c,Calu,Cap1,Cask,Cbfa2t3,Ccdc50,Ccnb1,Ccnd2,Ccr1l1,Ccr2,Ccr5,Ccr7,Ccrl2,Cd19,Cd2,Cd247,Cd276,Cd38,Cd44,Cd47,Cd55,Cd68,Cd97,C…	NA	NA	NA	NA	NA	NA	NA	0610031J06Rik,2700094K13Rik,Abcb10,Abcg1,Abhd2,Acaca,Acd,Ace,Acta1,Ada,Adam2,Adamts5,Adamtsl4,Adcy10,Adcy4,Adipor1,Adipor2,Adrb1,Aes,Aff1,Aff3,Agrp,Ak2,Akt1,Alad,Alas2,Angptl4,Ankrd27,Ankrd54,Apoe,Arhgdib,Arvcf,Asap1,Atad2,Atf3,Atf7ip,Atm,Atp1b3,Atp6v0b,Atp6v0d1,Atp6v1b2,Atp7a,Atp8a1,Aurkb,Avpr1b,Axl,B3galt2,B3gnt2,B4galt1,B4galt5,Bach1,Bak1,Bap1,Bax,Baz1b,Bcam,Bcar1,Bcl10,Bcmo1,Becn1,Bid,Blm,Bmx…	NA
MGI Expression: Detected	TS28 thymus	0		0								0		1190005F20Rik,1700027D21Rik,2610028H24Rik,4932438H23Rik,Abi1,Acd,Ace,Ada,Adam33,Adamts10,Adamtsl4,Adcy10,Adipor1,Aff1,Ak2,Akt1,Akt3,Angptl4,Apc,Apoe,Arhgdib,Atf3,Atp10a,Atp11a,Atp6v0a2,Atp6v0d1,Atp8a2,Aurkb,Axl,B3galt4,Bag1,Bak1,Bax,Bcl11a,Braf,Brca2,Btg2,C2,C4b,Cacna1c,Cacng4,Camk2a,Cap1,Capn5,Cbr1,Ccl25,Ccl5,Ccl9,Ccnd1,Ccnd2,Ccr1l1,Ccr2,Ccr4,Ccr5,Ccr7,Cct6b,Cct8,Cd22,Cd247,Cd38,Cd3e,Cd44,Cd53,C…	NA	1190005F20Rik,1700027D21Rik,1810008A18Rik,2610028H24Rik,Abca3,Abi1,Acadvl,Acd,Ace,Ada,Adam2,Adamts1,Adamts5,Adamtsl4,Adcy4,Adrb1,Aff1,Ak2,Alas2,Ankfy1,Anxa5,Aspn,Atp6v0d1,Axl,B3galt4,B3gnt2,Bach1,Bcl11a,Bmx,C2,C3,C4b,Cacna1c,Cacng4,Calu,Cap1,Ccdc50,Ccnb1,Ccnd2,Ccr1l1,Ccr2,Ccr5,Ccr7,Ccrl2,Cd2,Cd247,Cd38,Cd44,Cd47,Cd97,Cd99l2,Cdh23,Ceacam10,Cenph,Chaf1b,Chst3,Cit,Clca1,Clca5,Clec4d,Clec4n,Cnr2,Cops…	NA	NA	NA	NA	NA	NA	NA	1700027D21Rik,1810008A18Rik,2610028H24Rik,2700094K13Rik,Abcg1,Acd,Ace,Acta1,Ada,Adam2,Adamts5,Adamtsl4,Adcy10,Adcy4,Adipor1,Adipor2,Adrb1,Aff1,Agpat3,Ak2,Akt1,Alas2,Angptl4,Ankfy1,Ankrd54,Apoe,Arhgdib,Aspn,Atf3,Atm,Atp5o,Atp6v0d1,Atp8a1,Aurkb,Avpr1b,Axl,B3galt2,B3gnt2,Bach1,Bak1,Bax,Bcar1,Bcmo1,Bid,Blm,Bmx,Btg2,Cap1,Capn5,Casp12,Ccl17,Ccl22,Ccna2,Ccnb1,Ccnd2,Ccr1l1,Ccr2,Ccr5,Ccr7,Ccrl2,Cd247,Cd44…	NA
MGI Expression: Detected	TS28 visceral organ	0										0		0610031J06Rik,1190005F20Rik,1700027D21Rik,2010111I01Rik,2310043J07Rik,2610028H24Rik,2610305D13Rik,4932438H23Rik,A630095E13Rik,AB056442,AI316807,Abcc6,Abhd1,Abhd2,Abhd3,Abi1,Abt1,Acaa1a,Acadm,Acan,Acd,Ace,Acin1,Acox3,Acr,Acrv1,Actg2,Actn3,Acvr1b,Ada,Adam10,Adam33,Adamts10,Adamtsl2,Adamtsl4,Adcy10,Adh5,Adipor1,Adora2b,Adrb2,Adrbk1,Adssl1,Aes,Aff1,Aff3,Agrp,Agt,Agtr1b,Ahcy,Ak2,Akap10,Akt1,Akt3,Alas1…	NA	NA	NA	NA	NA	NA	NA	NA	NA	0610031J06Rik,1700027D21Rik,1810008A18Rik,2310043J07Rik,2610028H24Rik,2700094K13Rik,Abcb10,Abcc6,Abcg1,Abhd2,Acaa1a,Acaca,Acacb,Acd,Ace,Acin1,Acr,Acsl4,Acss2,Acta1,Actn3,Ada,Adam2,Adamts5,Adamtsl4,Adcy10,Adcy4,Adipor1,Adipor2,Adrb1,Adrb2,Adrb3,Adssl1,Aes,Aff1,Aff3,Agpat3,Agrp,Agtr1b,Ak2,Akt1,Alad,Alas2,Aldh1l1,Amelx,Amfr,Angpt1,Angptl4,Ankfy1,Ankrd27,Ankrd54,Apoa1,Apoc1,Apoc4,Apoe,Aqp1,Aqp11,Aqp3…	NA
Mouse Phenotype	abnormal adaptive immunity	0	0	0					0		3.19264e-226	0		AI848100,Abcc1,Abi1,Ada,Adam17,Adipoq,Adora2b,Adrb2,Aim2,Akt1,Akt3,Aoc3,Apoe,Appl1,Arhgdia,Arhgdib,Arhgef1,Arid3a,Arrb2,Atf3,Axl,B2m,B4galt1,BC096441,Bag4,Bak1,Batf,Batf3,Bax,Bcl10,Bcl3,Bik,Birc2,Birc3,Birc5,Bloc1s3,Braf,Brca2,Bst1,Camk2g,Card9,Casp3,Casp9,Ccl1,Ccl11,Ccl2,Ccl5,Ccr1,Ccr10,Ccr2,Ccr3,Ccr4,Ccr5,Ccr7,Cd19,Cd22,Cd244,Cd247,Cd28,Cd38,Cd3e,Cd3g,Cd44,Cd48,Cd68,Cd69,Cd72,Cd74,Cd79a,Cd80,Cd…	Abcc1,Abcg1,Abi1,Akt1,Apobec3,Arhgdia,Atf3,Batf3,Bbc3,Bcl6b,Birc2,Birc3,Birc5,Card9,Cd244,Cd47,Cd48,Cd84,Chrm1,Cnn2,Csf1,Csf3,Ctsl,Espn,Ets1,Fcgr1,Fgr,Fli1,Fos,Gm885,Gna12,Grk6,H2-D1,H2afx,Hps1,Hsh2d,Hsp90b1,Igj,Ikzf1,Inpp5d,Klf2,Lta,Ltb,Ly9,Map3k3,Me2,Mll5,Mmp28,Mt1,Mt2,Myo9b,Nfe2l2,Nlrp6,Notch2,Orai1,P2ry6,Pecam1,Pfn1,Pik3c2a,Ppia,Ppp2r3c,Prkcq,Psen1,Pstpip2,Ptprj,Rasa4,Rfk,Rhoh,Rpl22,Runx1,Rxr…	AI848100,Abca1,Abcc1,Abi1,Ada,Adora3,Adrb2,Alox5,Aoc3,Aplf,Apobec3,Arhgap15,Arhgef12,Arhgef6,Arid3a,Arntl,Axl,B2m,B3gnt2,B4galt1,BC096441,Bag4,Bank1,Bbs4,Bcl10,Bik,Birc2,Birc3,Blk,Bst1,C3,Camk2d,Camk2g,Card9,Casp3,Cbl,Ccr1,Ccr10,Ccr2,Ccr3,Ccr5,Ccr7,Ccrl2,Cd19,Cd200r1,Cd247,Cd274,Cd276,Cd38,Cd40lg,Cd44,Cd47,Cd68,Cd80,Cd81,Cdkn1b,Cebpb,Chi3l1,Chrm1,Clcn3,Clec4e,Cnpy3,Cnr2,Cops6,Crlf2,Cry2,Csf2rb,Cs…	NA	NA	NA	NA	Adcy9,Akt1,Alox5ap,B3gnt2,Bach2,Ccl5,Cd244,Cd276,Cd48,Cd69,Cd84,Cebpb,Clec7a,Clec9a,Cnn2,Cnr2,Csf3r,Ctsc,Dusp2,Dusp4,E2f2,Ets1,F11r,Fads2,Fli1,Flot1,Flt1,Flt3,Fyb,Ggta1,Gimap1,Gimap4,Gimap5,H2-D1,Hsh2d,Icam2,Id3,Ier3,Ikzf1,Il12a,Il21r,Il4ra,Il6ra,Irf2,Itgb3,Itpkb,Klf2,Klhl6,Klra10,Klra17,Klre1,Ksr1,Lta,Ltb,Ly9,Lyn,Mbtps1,Mdc1,Mdm4,Mrc1,Myh9,Ncf1,Nfkbia,Nos2,Notch1,Panx1,Pik3r1,Pla2g4a,Plcg2,Prex1…	NA	AI848100,Adora3,Aim2,Arid3a,Bbc3,Blm,Ccr1,Ccr2,Ccr3,Ccr5,Cd47,Cnr2,Csf2rb,Csf2rb2,Dapp1,E2f2,Fasl,Ggta1,Hdac6,Id3,Ifngr2,Il2rb,Klf13,Ksr1,Lgmn,Mcph1,Mpo,Mxd1,Ncf4,Nos2,Padi4,Pdlim2,Pim2,Psap,Ptpn22,Ptprj,Rabgef1,Rap1a,Rfk,Rfx5,Runx1,Runx3,Sema4b,Sh2d2a,Spna1,Sucnr1,Suv420h2,Tnfrsf13c,Tspan32,Xcr1,Xrcc6	AI848100,Abca1,Abcc1,Abcg1,Acp5,Ada,Adcy9,Adora3,Adrb2,Aim2,Akt1,Alox5,Aoc3,Aplf,Apoe,Arhgap15,Arhgdib,Arhgef12,Arhgef6,Arntl,Atf3,Atm,Axl,B2m,B3gnt2,B4galt1,BC096441,Bak1,Batf3,Bax,Bcl10,Bcl2l11,Bik,Birc2,Birc3,Birc5,Blm,Bmpr1a,C3ar1,C5ar1,Cabin1,Camk2g,Casp1,Casp3,Casp7,Casp9,Cbl,Ccr1,Ccr10,Ccr2,Ccr3,Ccr5,Ccr7,Ccrl2,Cd19,Cd200r1,Cd226,Cd247,Cd274,Cd276,Cd40lg,Cd44,Cd47,Cd68,Cd72,Cd9,Cdkn1b,Cebp…	NA
Mouse Phenotype	abnormal antigen presenting cell morphology	0		0					1.66704e-180			0		AI848100,Ada,Adam10,Adam17,Adrb2,Aff1,Ank,Ankrd11,Apoa1,Apoa4,Apoc3,Apoe,Arhgdia,Arhgdib,Arhgef1,Arid3a,Arsa,B2m,B9d2,Bak1,Batf,Batf3,Bax,Bcl10,Bcl3,Bik,Birc2,Birc3,Bst1,C4b,Casp3,Ccl2,Ccm2,Ccr2,Ccr4,Ccr7,Cd19,Cd207,Cd22,Cd44,Cd72,Cd79a,Cd81,Cd83,Cd84,Cdkn2b,Cebpb,Cebpe,Cflar,Chuk,Clec2d,Cnp,Cntf,Col10a1,Cpa3,Csf1,Csf1r,Ctnnb1,Cx3cr1,Cxcl14,Cxcr4,Cxcr7,Cyp27b1,Dapp1,Dll1,Dock2,Dock8,Dok2,Dtx1,Eef…	NA	AI848100,Ada,Adam10,Adrb2,Aff1,Ank,Ankrd11,Arhgap15,Arhgef6,Arid3a,Arntl,B2m,B9d2,Bank1,Bcl10,Bik,Birc2,Birc3,Blk,Bst1,C4b,Casp3,Ccr2,Ccr7,Cd19,Cd40lg,Cd44,Cd47,Cd81,Cebpb,Chi3l1,Col10a1,Cpa3,Ctnnb1,Ctsd,Dapp1,Dtx1,Egr1,Ewsr1,F2rl1,Fasl,Fgr,Flt3,Foxp3,Gab2,Gata1,Ggta1,Git2,Gpc3,Gpr183,Grb2,Iapp,Icam1,Icos,Id1,Idua,Ifnar1,Igf1r,Ikzf1,Il2rb,Il2rg,Il4,Il4ra,Inpp5d,Irak3,Irf2,Itgav,Itgb3,Klhl6,Klra17…	NA	NA	NA	NA	Bach2,Cd84,Cdkn2b,Cebpb,Clec2d,Cnn2,Dock8,Ets1,Fli1,Flt3,Ggta1,Gimap1,Gimap5,Ikzf1,Il4ra,Irf2,Itgb3,Klhl6,Klra17,Lta,Ltb,Lyn,Nfkbia,Nos2,Notch1,Pdgfb,Pik3r1,Plcg2,Psap,Rgs1,Runx3,Socs1,Sqstm1,Stat1,Tlr7,Tlr8,Tnf,Ubash3a,Zc3h12a	NA	NA	AI848100,Abcg1,Ada,Adrb2,Aff1,Ank,Ankrd11,Apoa1,Apoa4,Apoc3,Apoe,Ar,Arhgap15,Arhgdib,Arhgef6,Arntl,Arsa,Atm,B2m,B9d2,Bak1,Batf3,Bax,Bcl10,Bcl2l11,Bik,Birc2,Birc3,Bmpr1a,Casp3,Ccr2,Ccr7,Cd19,Cd40lg,Cd44,Cd47,Cd72,Cd9,Cebpb,Cebpe,Cflar,Chek2,Clcn7,Cpa3,Csf1,Ctsd,Ctsl,Ctss,Cx3cl1,Cx3cr1,Dapp1,Dicer1,Dok1,Dok3,Dtx1,Egr1,Elf1,Ets1,Ewsr1,Farp2,Fasl,Fcgr1,Fgr,Fli1,Flt3,Flt3l,Gab2,Gadd45b,Gata1,Ggta1,Git…	NA
Mouse Phenotype	abnormal antigen presenting cell physiology	0		0					6.05105e-268		3.98089e-149	0		AI848100,Ada,Adam17,Adora2b,Adrb2,Aim2,Apoe,Arhgdia,Arhgdib,Arhgef1,Arid3a,Atf3,Axl,B2m,B4galt1,BC096441,Bag4,Bak1,Batf,Batf3,Bax,Bcl10,Bcl3,Birc2,Birc3,Bst1,Camk2g,Card9,Casp3,Ccl2,Ccr10,Ccr2,Ccr4,Ccr5,Ccr7,Cd19,Cd22,Cd28,Cd44,Cd68,Cd69,Cd72,Cd74,Cd79a,Cd80,Cd81,Cd83,Cd84,Cebpb,Chuk,Cks1b,Clec4e,Clec7a,Clec9a,Cnpy3,Cnr2,Cry2,Csf1,Csf1r,Ctnnb1,Cx3cr1,Cxcl16,Cxcr2,Cxcr3,Cxcr4,Dapp1,Dbnl,Ddit3,Def6…	NA	AI848100,Abca1,Ada,Adrb2,Aplf,Apobec3,Arhgef6,Arid3a,Arntl,Axl,B2m,B3gnt2,B4galt1,BC096441,Bag4,Bank1,Bbs4,Bcl10,Birc2,Birc3,Bst1,C3,Camk2d,Camk2g,Card9,Casp3,Ccr10,Ccr2,Ccr5,Ccr7,Ccrl2,Cd19,Cd200r1,Cd274,Cd40lg,Cd44,Cd68,Cd80,Cd81,Cebpb,Chi3l1,Clcn3,Clec4e,Cnpy3,Cnr2,Crlf2,Cry2,Csf2rb,Csf2rb2,Ctla4,Ctnnb1,Cxcl9,Cybb,Dapp1,Ddit3,Dock3,Dtx1,Ecm1,Egr1,Ero1l,Esr2,F2rl1,Fads2,Fasl,Fcer1a,Fcgr2b,Fcgr3…	NA	NA	NA	NA	Adcy9,B3gnt2,Bach2,Cd69,Cd84,Cebpb,Clec7a,Clec9a,Cnn2,Cnr2,Dusp2,Dusp4,Ets1,F11r,Fads2,Fli1,Flt1,Flt3,Ggta1,Gimap5,Id3,Ier3,Ikzf1,Il21r,Il4ra,Irf2,Itgb3,Itpkb,Klf2,Klra10,Klra17,Lta,Ltb,Lyn,Mdc1,Mrc1,Ncf1,Nfkbia,Nos2,Pik3r1,Pla2g4a,Plcg2,Psap,Rgs1,Runx3,Sema4b,Slamf1,Socs1,Sqstm1,Stat1,Sucnr1,Tec,Tlr7,Tlr8,Tnf,Vamp8,Zc3h12a	NA	AI848100,Aim2,Arid3a,Blm,Ccr2,Ccr5,Cnr2,Csf2rb,Csf2rb2,Dapp1,Fasl,Ggta1,Hdac6,Id3,Ifngr2,Il2rb,Lgmn,Mxd1,Nos2,Pim2,Psap,Ptpn22,Ptprj,Rabgef1,Rap1a,Rfk,Rfx5,Runx3,Sema4b,Spna1,Sucnr1,Suv420h2,Tnfrsf13c,Xcr1,Xrcc6	AI848100,Abca1,Abcg1,Acp5,Ada,Adcy9,Adrb2,Aim2,Aplf,Apoe,Arhgdib,Arhgef6,Arntl,Atf3,Atm,Axl,B2m,B3gnt2,B4galt1,BC096441,Bak1,Batf3,Bax,Bcl10,Bcl2l11,Birc2,Birc3,Blm,Bmpr1a,C3ar1,Cabin1,Camk2g,Casp1,Casp3,Ccr10,Ccr2,Ccr5,Ccr7,Ccrl2,Cd19,Cd200r1,Cd274,Cd40lg,Cd44,Cd68,Cd72,Cd9,Cebpb,Cks1b,Clcn3,Clcn7,Clec4e,Cnpy3,Cnr2,Cry2,Csf1,Csf2rb,Csf2rb2,Ctse,Ctsl,Ctss,Cx3cl1,Cx3cr1,Dapp1,Ddit3,Def6,Dock3,Dok1…	NA
Mouse Phenotype	abnormal B cell activation	0		0								0		Apoe,Arhgdia,Arhgdib,Arhgef1,Axl,Bcl10,Birc3,Ccr7,Cd19,Cd22,Cd72,Cd74,Cd79a,Cd80,Cd81,Chuk,Cks1b,Dapp1,Dtx1,Ercc1,Ets1,Fasl,Fcer2a,Fli1,Gabpb2,Gimap5,Gpr132,Grb2,Hdac1,Hrh1,Id3,Ikzf1,Il12rb2,Il5ra,Il6,Inpp5d,Irf2,Lat,Lilrb3,Lyn,Mcm3ap,Myd88,Ncoa3,Nfkbia,Orai1,Pawr,Pdcd1,Pfdn1,Pik3ap1,Pik3r1,Pim1,Plcl2,Pou2af1,Ppm1d,Ppp2r3c,Prkcd,Pten,Ptpn6,Rassf5,Relb,S1pr2,Samsn1,Sema4d,Sfpi1,Skap2,Slc3a2,Smad3,…	NA	Arhgef6,Axl,Bank1,Bcl10,Birc3,Ccr7,Cd19,Cd80,Cd81,Dapp1,Dtx1,Fasl,Gpr183,Grb2,Hrh1,Id3,Ikzf1,Il2rb,Il4,Inpp5d,Irf2,Lat,Map3k14,Mcm3ap,Myc,Nbn,Ncoa3,Nfkb1,Pawr,Pfdn1,Pik3r1,Pim1,Pim2,Ppm1d,Ppp2r3c,Ptpn6,Rhog,S1pr2,Samsn1,Sema4d,Sfpi1,Siae,Slc3a2,Stim1,Stim2,Tec,Tnfrsf13c,Traf5,Vav1,Xiap	NA	NA	NA	NA	NA	NA	NA	Apoe,Arhgdib,Arhgef6,Axl,Bcl10,Bcl2l11,Birc3,Ccr7,Cd19,Cd72,Cks1b,Dapp1,Dok1,Dtx1,Ercc1,Ets1,Fasl,Fli1,Gpr183,Grb2,Hdac1,Hrh1,Id3,Ikzf1,Ikzf3,Il12rb2,Il2rb,Il4,Il6,Inpp5d,Irf2,Lat,Mcm3ap,Myc,Myd88,Ncoa3,Nfkb1,Orai1,Pfdn1,Pik3ap1,Pik3r1,Pim1,Pim2,Plcg2,Ppp2r3c,Prkcd,Ptpn6,Relb,Samsn1,Sema4d,Sfpi1,Skap2,Slc3a2,Smad3,Spib,Spna1,Stat6,Tcf3,Tec,Tnfrsf13c,Tnfrsf21,Traf5,Vav1,Vav2,Vav3,Xiap	NA
Mouse Phenotype	abnormal B cell differentiation	0		0					3.98843e-125			0		Adam10,Aff1,Apoe,Arhgdia,Arhgdib,Arhgef1,Arid3a,Axl,B2m,BC096441,Bak1,Batf,Bax,Bcl10,Bcl11a,Bcl3,Bik,Birc3,Bst1,Cbfa2t3,Ccr7,Cd19,Cd22,Cd24a,Cd28,Cd69,Cd72,Cd74,Cd79a,Cd80,Cd81,Chuk,Cks1b,Cpa3,Cxcr4,Dapp1,Dck,Def6,Dntt,Dock2,Dtx1,Elf1,Ercc1,Erg,Ets1,Ewsr1,Fasl,Fcamr,Fcer2a,Fli1,Flt3,Flt3l,Foxn1,Fshr,Gabpb2,Ggta1,Gimap1,Gimap5,Gpr132,Grb2,H2afx,Hdac1,Hrh1,Id3,Igll1,Ikzf1,Il12rb2,Il5ra,Il6,Inpp5d,I…	NA	Adam10,Aff1,Aplf,Arhgef6,Arid3a,Arntl,Asxl1,Axl,B2m,BC096441,Bank1,Bcl10,Bcl11a,Bik,Birc3,Blk,Bst1,Cbfa2t3,Ccr7,Cd19,Cd24a,Cd40lg,Cd80,Cd81,Cpa3,Crlf2,Dapp1,Dck,Dkc1,Dll4,Dtx1,Erg,Ern1,Esr2,Ewsr1,Fasl,Flt3,Fyn,Ggta1,Gpr183,Grb2,Hrh1,Icos,Id1,Id3,Ifngr2,Ikzf1,Il2rb,Il2rg,Il4,Inpp5d,Irf2,Itga4,Jak1,Kit,Klhl6,Lat,Malt1,Map3k14,Mcl1,Mcm3ap,Mdc1,Mdm2,Me2,Mll5,Msi2,Myb,Myc,Nbn,Ncoa3,Nfkb1,Nhej1,Notch1,…	NA	NA	NA	NA	Bach2,Bcl11a,Cd69,Ern1,Ets1,Fli1,Flt3,Ggta1,Gimap1,Gimap5,Id3,Ikzf1,Irf2,Klhl6,Lta,Ltb,Lyn,Mdc1,Nfkbia,Notch1,Pik3r1,Plcg2,Socs1,Sp3,Tec,Tnf,Zc3h12a	NA	NA	Aff1,Aplf,Apoe,Ar,Arhgdib,Arhgef6,Arntl,Atm,Axl,B2m,BC096441,Bak1,Bax,Bcl10,Bcl2l11,Bik,Birc3,Cbfa2t3,Ccr7,Cd19,Cd24a,Cd40lg,Cd72,Chek2,Cks1b,Cpa3,Dapp1,Def6,Dicer1,Dkc1,Dll4,Dok1,Dtx1,Elf1,Ercc1,Erg,Ern1,Esr2,Ets1,Ewsr1,Fasl,Fli1,Flt3,Flt3l,Foxn1,Ggta1,Gpr183,Grb2,H2afx,Hdac1,Hrh1,Htra2,Id1,Id3,Ifngr2,Igll1,Ikzf1,Ikzf3,Il12rb2,Il2rb,Il4,Il6,Il7r,Inpp5d,Irf2,Irf8,Itga4,Jak1,Klhl6,Klhl7,Lat,Mcl1,M…	NA
Mouse Phenotype	abnormal B cell morphology	0		0					4.17604e-163			0		Adam10,Adam17,Aff1,Apoe,Arhgdia,Arhgdib,Arhgef1,Arid3a,Axl,B2m,BC096441,Bak1,Batf,Bax,Bcl10,Bcl11a,Bcl3,Bik,Birc2,Birc3,Bst1,Cbfa2t3,Ccr10,Ccr2,Ccr7,Cd19,Cd22,Cd24a,Cd28,Cd3e,Cd69,Cd72,Cd74,Cd79a,Cd80,Cd81,Cd83,Cd84,Cdkn2b,Cebpb,Cebpe,Cflar,Chuk,Cks1b,Col10a1,Cpa3,Cr1l,Cxcr2,Cxcr4,Cxcr7,Dapp1,Dck,Def6,Dll1,Dntt,Dock2,Dock8,Dtx1,Eef1a2,Elf1,Ercc1,Erg,Ets1,Ewsr1,F3,Fadd,Faim3,Fasl,Fcamr,Fcer2a,Fli1…	NA	Adam10,Aff1,Aplf,Arhgef6,Arid3a,Arid4b,Arntl,Asxl1,Axl,B2m,BC096441,Bank1,Bcl10,Bcl11a,Bik,Birc2,Birc3,Blk,Bst1,Cbfa2t3,Ccr10,Ccr2,Ccr7,Cd19,Cd24a,Cd40lg,Cd80,Cd81,Cebpb,Col10a1,Cpa3,Cr1l,Crlf2,Dapp1,Dck,Dkc1,Dll4,Dtx1,Erg,Ern1,Esr2,Ewsr1,Fasl,Flt3,Foxp3,Fyn,Galr2,Gfi1,Ggta1,Git2,Gpr183,Grb2,Hrh1,Icos,Id1,Id3,Ifngr2,Ikzf1,Il2rb,Il2rg,Il4,Inpp5d,Irf2,Itga4,Jak1,Kit,Klhl6,Lat,Malt1,Map3k14,Mcl1,Mcm…	NA	NA	NA	NA	Bach2,Bcl11a,Cd69,Cd84,Cdkn2b,Cebpb,Dock8,Ern1,Ets1,Fli1,Flt3,Ggta1,Gimap1,Gimap5,Id3,Ikzf1,Irf2,Klhl6,Lta,Ltb,Lyn,Mdc1,Nfkbia,Notch1,Pik3r1,Plcg2,Rgs1,Socs1,Sp3,Tec,Tlr7,Tlr8,Tnf,Tom1l2,Ubash3a,Zc3h12a	NA	NA	Abcg1,Aff1,Aplf,Apoe,Ar,Arhgdib,Arhgef6,Arid4a,Arid4b,Arntl,Atm,Axl,B2m,BC096441,Bak1,Bax,Bcl10,Bcl2l11,Bik,Birc2,Birc3,Cbfa2t3,Ccr10,Ccr2,Ccr7,Cd19,Cd24a,Cd40lg,Cd72,Cds2,Cebpb,Cebpe,Cflar,Chek2,Cks1b,Cpa3,Dapp1,Def6,Dicer1,Dkc1,Dll4,Dok1,Dtx1,Elf1,Ercc1,Erg,Ern1,Esr2,Ets1,Ewsr1,Fadd,Fasl,Fli1,Flt3,Flt3l,Foxn1,Gadd45b,Galr2,Gfi1,Ggta1,Git2,Gna13,Gpr183,Grb2,H2-Ab1,H2afx,Hdac1,Hrh1,Htra2,Id1,Id3,…	NA
Mouse Phenotype	abnormal B cell number	0		0					3.45833e-142			0		Adam10,Adam17,Aff1,Apoe,Arhgdia,Arhgdib,Arhgef1,Arid3a,B2m,Bak1,Batf,Bax,Bcl10,Bcl11a,Bcl3,Bik,Birc2,Birc3,Bst1,Cbfa2t3,Ccr2,Cd19,Cd22,Cd24a,Cd28,Cd69,Cd72,Cd74,Cd79a,Cd81,Cd84,Cdkn2b,Cebpe,Cflar,Chuk,Col10a1,Cr1l,Cxcr2,Cxcr4,Cxcr7,Dapp1,Dck,Def6,Dll1,Dock2,Dock8,Dtx1,Eef1a2,Elf1,Erg,Ets1,Ewsr1,F3,Fadd,Faim3,Fasl,Fli1,Flt3,Flt3l,Fos,Foxn1,Foxo1,Fshr,Gadd45b,Galr2,Ggta1,Gimap1,Gimap5,Git2,Gna13,Gp…	NA	Adam10,Aff1,Arhgef6,Arid3a,Arid4b,Arntl,Asxl1,B2m,Bank1,Bcl10,Bcl11a,Bik,Birc2,Birc3,Blk,Bst1,Cbfa2t3,Ccr2,Cd19,Cd24a,Cd81,Col10a1,Cr1l,Crlf2,Dapp1,Dck,Dkc1,Dll4,Dtx1,Erg,Esr2,Ewsr1,Fasl,Flt3,Foxp3,Fyn,Galr2,Gfi1,Ggta1,Git2,Gpr183,Grb2,Icos,Id1,Ikzf1,Il2rb,Il2rg,Il4,Inpp5d,Irf2,Itga4,Jak1,Kit,Klhl6,Lat,Malt1,Map3k14,Mcl1,Mcm3ap,Mdm2,Mll5,Msi2,Myb,Myc,Nbn,Ncoa3,Nedd4,Nfatc3,Nfkb1,Nlrp6,Notch1,Nr3c…	NA	NA	NA	NA	Bach2,Bcl11a,Cd69,Cd84,Cdkn2b,Dock8,Ets1,Fli1,Flt3,Ggta1,Gimap1,Gimap5,Ikzf1,Irf2,Klhl6,Lta,Ltb,Lyn,Nfkbia,Notch1,Pik3r1,Plcg2,Rgs1,Socs1,Tec,Tlr7,Tlr8,Tnf,Tom1l2,Ubash3a,Zc3h12a	NA	NA	Abcg1,Aff1,Apoe,Ar,Arhgdib,Arhgef6,Arid4a,Arid4b,Arntl,Atm,B2m,Bak1,Bax,Bcl10,Bcl2l11,Bik,Birc2,Birc3,Cbfa2t3,Ccr2,Cd19,Cd24a,Cd72,Cds2,Cebpe,Cflar,Dapp1,Def6,Dicer1,Dkc1,Dll4,Dtx1,Elf1,Erg,Esr2,Ets1,Ewsr1,Fadd,Fasl,Fli1,Flt3,Flt3l,Foxn1,Gadd45b,Galr2,Gfi1,Ggta1,Git2,Gna13,Gpr183,Grb2,H2-Ab1,H2afx,Hdac1,Htra2,Id1,Igll1,Ikzf1,Ikzf3,Il2rb,Il4,Il7r,Inpp5d,Irf2,Irf8,Itga4,Itgb7,Itk,Jak1,Klhl6,Klhl7,L…	NA
Mouse Phenotype	abnormal B cell physiology	0		0					1.5593e-167		5.41e-112	0		Ada,Apoe,Arhgdia,Arhgdib,Arhgef1,Arid3a,Atf3,Axl,B2m,BC096441,Bak1,Batf,Bax,Bcl10,Bcl3,Birc2,Birc3,Bst1,Ccl2,Ccr10,Ccr2,Ccr4,Ccr5,Ccr7,Cd19,Cd22,Cd28,Cd69,Cd72,Cd74,Cd79a,Cd80,Cd81,Cd83,Cd84,Cebpb,Chuk,Cks1b,Cxcr2,Cxcr4,Dapp1,Dbnl,Def6,Dll1,Dtx1,Dusp4,Ecm1,Elavl1,Elf1,Ercc1,Ets1,Fasl,Fcamr,Fcer1g,Fcer2a,Fcgr1,Fcgr2b,Fcgrt,Fcrla,Fcrlb,Fli1,Flt3l,Foxn1,Gabpb2,Gadd45b,Gcnt3,Ggta1,Gimap5,Gna13,Gnai2,…	NA	Ada,Aplf,Apobec3,Arhgef6,Arid3a,Arntl,Axl,B2m,BC096441,Bank1,Bbs4,Bcl10,Birc2,Birc3,Bst1,C3,Ccr10,Ccr2,Ccr5,Ccr7,Cd19,Cd40lg,Cd80,Cd81,Cebpb,Chi3l1,Crlf2,Csf2rb,Csf2rb2,Ctla4,Cxcl9,Dapp1,Dtx1,Ecm1,Esr2,F2rl1,Fasl,Fcgr2b,Fcrla,Fcrlb,Fkbp11,Foxp3,Fyn,Gadd45a,Gata3,Gcnt3,Ggta1,Gpr183,Grb2,Hdac6,Hrh1,Icos,Id3,Ifnar1,Ifnar2,Ifngr2,Ikzf1,Il21r,Il2rb,Il2rg,Il4,Il4ra,Inpp5d,Irf1,Irf2,Itga4,Itgb2,Itgb3,It…	NA	NA	NA	NA	Adcy9,Bach2,Cd69,Cd84,Cebpb,Dusp4,Ets1,Fli1,Ggta1,Gimap5,Id3,Ikzf1,Il21r,Il4ra,Irf2,Itgb3,Itpkb,Klf2,Klra10,Lta,Ltb,Lyn,Mdc1,Nfkbia,Nos2,Pik3r1,Plcg2,Rgs1,Runx3,Sema4b,Stat1,Tec,Tlr7,Tlr8,Tnf,Zc3h12a	NA	Arid3a,Blm,Ccr2,Ccr5,Csf2rb,Csf2rb2,Dapp1,Fasl,Ggta1,Hdac6,Id3,Ifngr2,Il2rb,Mxd1,Nos2,Pim2,Ptpn22,Ptprj,Rabgef1,Rfx5,Runx3,Sema4b,Spna1,Suv420h2,Tnfrsf13c,Xrcc6	Ada,Adcy9,Aplf,Apoe,Arhgdib,Arhgef6,Arntl,Atf3,Atm,Axl,B2m,BC096441,Bak1,Bax,Bcl10,Bcl2l11,Birc2,Birc3,Blm,C3ar1,Cabin1,Ccr10,Ccr2,Ccr5,Ccr7,Cd19,Cd40lg,Cd72,Cebpb,Cks1b,Csf2rb,Csf2rb2,Ctse,Ctss,Dapp1,Def6,Dok1,Dtx1,Ecm1,Elf1,Ercc1,Esr2,Ets1,Fasl,Fcgr1,Fcgr2b,Fcrla,Fcrlb,Fli1,Flt3l,Foxn1,Gadd45a,Gadd45b,Gcnt3,Ggta1,Gna13,Gnai2,Gpr183,Grb2,Grk6,H2-Aa,H2-Ab1,H2afx,Hdac1,Hdac6,Hr,Hrh1,Id3,Ifnar1,Ifn…	NA
Mouse Phenotype	abnormal B cell proliferation	0		0								0		Arhgdia,Arhgdib,Arhgef1,Axl,Bcl10,Birc3,Cd19,Cd22,Cd72,Cd74,Cd79a,Cd80,Cd81,Cks1b,Dapp1,Dtx1,Ercc1,Ets1,Fasl,Fcer2a,Fli1,Gabpb2,Gimap5,Gpr132,Grb2,Hdac1,Hrh1,Id3,Ikzf1,Il5ra,Il6,Inpp5d,Irf2,Lilrb3,Lyn,Mcm3ap,Myd88,Ncoa3,Nfkbia,Pawr,Pdcd1,Pik3ap1,Pik3r1,Pim1,Plcl2,Pou2af1,Ppm1d,Ppp2r3c,Prkcd,Pten,Ptpn6,Rassf5,Relb,S1pr2,Samsn1,Sema4d,Sfpi1,Skap2,Slc3a2,Smad3,Spna1,Stat6,Sykb,Tank,Tcf3,Tec,Tlr9,Tnf…	NA	Arhgef6,Axl,Bank1,Bcl10,Birc3,Cd19,Cd80,Cd81,Dapp1,Dtx1,Fasl,Gpr183,Grb2,Hrh1,Id3,Ikzf1,Il4,Inpp5d,Irf2,Mcm3ap,Myc,Nbn,Ncoa3,Nfkb1,Pawr,Pik3r1,Pim1,Pim2,Ppm1d,Ppp2r3c,Ptpn6,Rhog,S1pr2,Samsn1,Sema4d,Sfpi1,Siae,Slc3a2,Stim1,Stim2,Tec,Tnfrsf13c,Traf5,Vav1,Xiap	NA	NA	NA	NA	NA	NA	NA	Arhgdib,Arhgef6,Axl,Bcl10,Bcl2l11,Birc3,Cd19,Cd72,Cks1b,Dapp1,Dok1,Dtx1,Ercc1,Ets1,Fasl,Fli1,Gpr183,Grb2,Hdac1,Hrh1,Id3,Ikzf1,Ikzf3,Il4,Il6,Inpp5d,Irf2,Mcm3ap,Myc,Myd88,Ncoa3,Nfkb1,Pik3ap1,Pik3r1,Pim1,Pim2,Plcg2,Ppp2r3c,Prkcd,Ptpn6,Relb,Samsn1,Sema4d,Sfpi1,Skap2,Slc3a2,Smad3,Spib,Spna1,Stat6,Tcf3,Tec,Tnfrsf13c,Tnfrsf21,Traf5,Vav1,Vav2,Vav3,Xiap	NA
Mouse Phenotype	abnormal blood cell morphology/development	0		0					0	0	0	0		1190003J15Rik,AI848100,Abi1,Ace,Ada,Adam10,Adam17,Adamts13,Adipoq,Adrb2,Aff1,Aim2,Akt1,Akt3,Amhr2,Ank,Ankrd11,Ap3d1,Apc,Apoa1,Apoa4,Apoc3,Apoe,Appl1,Aprt,Arf6,Arhgdia,Arhgdib,Arhgef1,Arid3a,Arsa,Atp7b,Axl,B2m,B4galt1,B9d2,BC096441,Bak1,Batf,Batf3,Bax,Bcl10,Bcl11a,Bcl3,Bik,Bin3,Birc2,Birc3,Birc5,Braf,Brca2,Bst1,C4b,Carm1,Casp3,Cbfa2t3,Cbs,Ccl11,Ccl2,Ccl25,Ccl3,Ccl5,Ccl7,Ccm2,Ccnd1,Ccnd2,Ccr1,Ccr10…	NA	1190003J15Rik,2010002N04Rik,AI848100,Abca1,Abhd5,Abi1,Ace,Ada,Adam10,Add1,Add2,Adrb2,Aff1,Agtr1a,Alas2,Amhr2,Ank,Ankrd11,Aplf,Aprt,Aqp2,Arhgap15,Arhgef12,Arhgef6,Arid3a,Arid4b,Arntl,Asxl1,Avpr2,Axl,B2m,B3gnt2,B4galt1,B9d2,BC096441,Bank1,Bcl10,Bcl11a,Bik,Birc2,Birc3,Blk,Bnip3l,Bst1,Btrc,C1galt1,C3,C4b,Casp3,Cbfa2t3,Cbl,Ccnd2,Ccr1,Ccr10,Ccr2,Ccr3,Ccr5,Ccr7,Cd19,Cd247,Cd24a,Cd274,Cd276,Cd40lg,Cd44,C…	NA	NA	NA	NA	Akt1,B3gnt2,Bach2,Bcl11a,Ccl3,Ccl5,Cd276,Cd48,Cd69,Cd84,Cdkn2a,Cdkn2b,Cebpb,Chst3,Clec1b,Clec2d,Cnn2,Csf3r,Dock8,E2f2,Egln3,Elk4,Ern1,Ets1,Fli1,Flt1,Flt3,Fyb,Gapdh,Ggta1,Gimap1,Gimap5,Gsx1,H2-D1,Hbb-b1,Hivep3,Hmga1,Hps5,Hsh2d,Id3,Ier3,Ikzf1,Il21r,Il4ra,Irf2,Itgb3,Itpkb,Klf2,Klhl6,Klra17,Ksr1,Lgals9,Lta,Ltb,Ly9,Lyn,Mafk,Mdc1,Mdm4,Myh9,Nfkbia,Nos2,Notch1,Pdgfb,Pik3r1,Pla2g4a,Plcg2,Pou2f1,Ppp1r15b,P…	Add2,Adrb2,Aim2,Alas2,Ankrd11,Aprt,Arhgef12,B2m,B4galt1,Bcl10,Bcl11a,Bik,Birc2,Birc3,Carm1,Cbfa2t3,Cd24a,Cd47,Cd59a,Cd59b,Cerk,Cno,Comt,Crh,Csf2rb,Csf2rb2,Cul4a,Cx3cl1,Cx3cr1,Dapp1,Dnase2a,Dph1,Dusp1,Egr1,Eif2c2,Epb4.2,Fbxo30,Fech,Fen1,Foxo3,Gadd45a,Gata1,Gfi1b,Gnai2,Gypa,Hba-a2,Hba-x,Hbb-b1,Hfe,Hk1,Hps6,Hr,Hyal2,Icam1,Icam4,Ier3,Ifnar1,Ifnar2,Igf1r,Ikzf1,Il10rb,Il21r,Il2rb,Il4ra,Itga4,Jak1,Kcnn4…	2010002N04Rik,AI848100,Aim2,Ankrd11,Aprt,Arid3a,Bbc3,Bin3,Blm,Cbfa2t3,Ccr1,Ccr2,Ccr3,Ccr5,Cd47,Chst3,Csf2rb,Csf2rb2,Dapp1,Dyrk3,E2f2,Epor,Fasl,Fzr1,Gata1,Gfi1b,Ggta1,Hlx,Id3,Ifngr2,Il2rb,Itga2b,Klf13,Ksr1,Lbr,Lfng,Lgals9,Lgmn,Lyl1,Mafk,Mpo,Mtf1,Mxd1,Naglu,Nfe2,Nos2,Pim2,Ppp1r15a,Psap,Ptpn22,Ptprj,Rabgef1,Rap1a,Rfx5,Runx1,Runx3,Sap30bp,Sh2d2a,Spna1,St3gal1,Sucnr1,Suv420h2,Tac4,Tfrc,Thoc5,Tmprss6,T…	AI848100,Abca1,Abcg1,Abhd5,Ace,Ada,Add1,Add2,Adrb2,Aff1,Aim2,Akt1,Alas2,Ank,Ankrd11,Aplf,Apoa1,Apoa4,Apoc3,Apoe,Aprt,Aqp1,Ar,Arf6,Arhgap1,Arhgap15,Arhgdib,Arhgef12,Arhgef6,Arid4a,Arid4b,Arntl,Arsa,Atm,Axl,B2m,B3gnt2,B4galt1,B9d2,BC096441,Bak1,Batf3,Bax,Bcl10,Bcl2l11,Bik,Birc2,Birc3,Birc5,Blm,Bmpr1a,C1galt1,C3ar1,Capns1,Casp3,Cbfa2t3,Cbl,Cbs,Cby1,Ccna2,Ccnd2,Ccne1,Ccr1,Ccr10,Ccr2,Ccr3,Ccr5,Ccr7,Cd…	NA
Mouse Phenotype	abnormal blood vessel physiology	0										0		Abhd2,Ace,Adipoq,Adora2b,Adra2b,Agt,Apoa1,Apoe,Arhgef1,Atp2a3,Bnc1,C4b,Cbs,Ccl2,Ccm2,Ccr2,Cd19,Cd44,Chd2,Clic4,Crk,Cry2,Csrp1,Ctnnb1,Cx3cr1,Cysltr1,Ednrb,Egr1,Elk3,Eng,Esam,Ets1,Ets2,F2r,F3,Fbn1,Fcer1g,Fcgr2b,Fgfr2,Fli1,Flna,Git1,Gna11,Gna13,Gnaq,Gpr124,Gpr17,H2afx,Hif1a,Ier3,Ifngr1,Il6,Irf1,Irs1,Kcnn4,Kit,Lepr,Lrp1,Lrp5,Map3k1,Mmp2,Mmp9,Mtap,Nos2,Npr1,Nr3c1,Nrarp,P2ry6,Pdc,Pdcd1,Pdgfrb,Pecam1,Pg…	NA	NA	NA	NA	NA	NA	NA	NA	NA	Abcc4,Abcc9,Abhd2,Ace,Adm,Apoa1,Apoe,Aqp1,Arhgef12,Atp2a3,Bcar1,Bcl2l11,Cbs,Ccr2,Cd19,Cd44,Chd2,Clic4,Cry2,Csrp1,Ctss,Cx3cr1,Ddah1,Dicer1,Drosha,Egr1,Elk3,Esam,Esr2,Ets1,Ets2,F2r,Fcgr2b,Fgf2,Fli1,Git1,Gna11,Gna13,Gpr124,H2afx,Id1,Ier3,Il1b,Il6,Kcnn4,Lep,Lepr,Lif,Lpl,Lrp1,Ltc4s,Map3k1,Mmp11,Myof,Ngfr,Nos2,Nr3c1,P2ry6,Pdgfb,Pgp,Plac8,Prkg1,Psen1,Psen2,Ptafr,Ptch2,Ptgir,Ptk2,Rac2,Ramp1,Ramp2,Rock2,S…	NA
Mouse Phenotype	abnormal bone marrow cell morphology/development	0		0					0	0	3.04102e-243	0		1190003J15Rik,Abi1,Ada,Adam10,Adam17,Adamts13,Aff1,Akt1,Akt3,Ap3d1,Apc,Apoe,Appl1,Arhgdia,Arhgdib,Arhgef1,Arid3a,Atp7b,Axl,B2m,B4galt1,B9d2,BC096441,Bak1,Batf,Bax,Bcl10,Bcl11a,Bcl3,Bik,Birc3,Birc5,Braf,Brca2,Bst1,Cacna1a,Carm1,Casp3,Cbfa2t3,Ccl11,Ccl5,Ccnd1,Ccnd2,Ccr2,Ccr3,Ccr4,Ccr5,Ccr7,Cd19,Cd22,Cd247,Cd24a,Cd28,Cd34,Cd3d,Cd3e,Cd3g,Cd48,Cd5l,Cd69,Cd72,Cd74,Cd79a,Cd80,Cd81,Cd83,Cdk4,Cdkn1b,Cdkn2…	NA	1190003J15Rik,2010002N04Rik,Abca1,Abi1,Ada,Adam10,Add1,Aff1,Aplf,Arhgef12,Arhgef6,Arid3a,Arid4b,Arntl,Asxl1,Axl,B2m,B3gnt2,B4galt1,B9d2,BC096441,Bank1,Bcl10,Bcl11a,Bik,Birc3,Blk,Bnip3l,Bst1,C1galt1,C3,Casp3,Cbfa2t3,Cbl,Ccnd2,Ccr2,Ccr3,Ccr5,Ccr7,Cd19,Cd247,Cd24a,Cd276,Cd40lg,Cd47,Cd59b,Cd80,Cd81,Cdkn1b,Cebpb,Clec4n,Clic1,Cno,Col10a1,Cpa3,Crlf2,Cry2,Csf2rb,Csf2rb2,Ctcf,Ctla4,Ctsd,Ctsg,Dapp1,Dck,Dff…	NA	NA	NA	NA	Akt1,B3gnt2,Bach2,Bcl11a,Ccl5,Cd276,Cd48,Cd69,Cdkn2a,Cdkn2b,Cebpb,Clec1b,Cnn2,Csf3r,E2f2,Elk4,Ern1,Ets1,Fli1,Flt3,Fyb,Ggta1,Gimap1,Gimap5,H2-D1,Hbb-b1,Hivep3,Hps5,Hsh2d,Icam2,Id3,Ikzf1,Il21r,Il4ra,Irf2,Itpkb,Klf2,Klhl6,Ksr1,Lta,Ltb,Ly9,Lyn,Mafk,Mdc1,Mdm4,Myh9,Nfkbia,Nos2,Notch1,Pdgfb,Pik3r1,Plcg2,Prkcq,Rab27a,Runx3,Serpinb2,Sin3b,Slamf1,Slc46a2,Socs1,Sp3,Spred2,Stat1,Stat4,Sucnr1,Tec,Tnf,Tom1l2,T…	Arhgef12,B2m,B4galt1,Bcl10,Bcl11a,Bik,Birc3,Carm1,Cbfa2t3,Cd24a,Cd47,Cd59b,Cno,Crh,Csf2rb,Csf2rb2,Cul4a,Dapp1,Dnase2a,Egr1,Eif2c2,Fbxo30,Foxo3,Gadd45a,Gata1,Gfi1b,Gnai2,Hba-a2,Hba-x,Hbb-b1,Hps6,Hr,Hyal2,Icam1,Ifnar1,Ikzf1,Il21r,Il2rb,Il4ra,Itga4,Jak1,Klf1,Klf13,Lat2,Mafk,Mapk14,Mdc1,Mdm2,Mxd1,Mxi1,Myc,Nhej1,Nkx3-1,Orai1,Pcid2,Pfdn1,Phc1,Pim1,Pim2,Plau,Pnp,Ppm1d,Ppp2r3c,Prg2,Prkcd,Prkce,Rhoh,Rnf8,…	2010002N04Rik,Arid3a,Bbc3,Blm,Cbfa2t3,Ccr2,Ccr3,Ccr5,Cd47,Creb3l1,Csf2rb,Csf2rb2,Dapp1,Dyrk3,E2f2,Epor,Fasl,Fzr1,Gata1,Gfi1b,Ggta1,Id3,Ifngr2,Il2rb,Itga2b,Klf13,Ksr1,Lbr,Lgmn,Lyl1,Mafk,Mxd1,Nfe2,Nos2,Pim2,Ptpn22,Ptprj,Rap1a,Runx1,Runx3,Sh2d2a,Spna1,Sucnr1,Suv420h2,Tac4,Tfrc,Thoc5,Tnfrsf13c,Treml1,Tspan32,Xrcc6,Zfpm1	Abca1,Abcg1,Ada,Add1,Aff1,Akt1,Aplf,Apoe,Ar,Arhgap1,Arhgdib,Arhgef12,Arhgef6,Arid4a,Arid4b,Arntl,Atm,Axl,B2m,B3gnt2,B4galt1,B9d2,BC096441,Bak1,Bax,Bcl10,Bcl2l11,Bik,Birc3,Birc5,Blm,C1galt1,C3ar1,Cacna1a,Casp3,Cbfa2t3,Cbl,Ccna2,Ccnd2,Ccne1,Ccr2,Ccr3,Ccr5,Ccr7,Cd19,Cd226,Cd247,Cd24a,Cd276,Cd40lg,Cd47,Cd59b,Cd72,Cdkn1b,Cebpb,Cebpe,Cflar,Chd2,Chd4,Chek2,Cks1b,Clec4n,Clic1,Cno,Cpa3,Cry2,Csf1,Csf2rb,Cs…	NA
Mouse Phenotype	abnormal CD4-positive T cell morphology	0		0					3.13844e-112			0		Adam10,Apoe,B2m,B9d2,BC096441,Batf,Bcl11a,Ccl2,Ccl5,Ccnd1,Ccr2,Ccr5,Ccr7,Cd19,Cd247,Cd28,Cd3d,Cd3e,Cd44,Cd48,Cd74,Cd79a,Cd83,Cd84,Cdkn2a,Cflar,Chd2,Clec4n,Col10a1,Cr1l,Ctcf,Diap1,Dll1,Dock2,Ebi3,Elavl1,Elk4,Ets1,Fadd,Foxn1,Foxo1,Gadd45b,Gem,Gimap1,Gimap5,Git2,Gna13,Gpr30,Grap,Grap2,Grb2,H2-Aa,H2-Ab1,H2-D1,H2-K1,Id3,Ifngr1,Il17ra,Il21r,Il2ra,Il4ra,Il5ra,Il6,Il6st,Il9r,Irf1,Itgam,Itgb7,Itpkb,Ksr1,L…	NA	Adam10,Arhgef6,Asxl1,B2m,B9d2,BC096441,Bcl11a,Cbl,Ccr2,Ccr5,Ccr7,Cd19,Cd247,Cd274,Cd40lg,Cd44,Chi3l1,Clec4n,Col10a1,Cr1l,Ctcf,Ctla4,Diap1,Dll4,E2f1,Ebi3,Esr2,Foxp3,Fyn,Gata3,Git2,Gmnn,Grap2,Grb2,H2-K1,Icos,Id3,Ifngr2,Il21r,Il2rb,Il2rg,Il4,Il4ra,Irf1,Itga4,Itgb2,Itpkb,Ksr1,Lat,Lat2,Lcp2,Lepr,Lgals9,Map3k14,Map3k3,Mapk14,Mcl1,Mpz,Msi2,Myb,Nbn,Ncoa3,Nedd4,Nfatc2ip,Nfatc3,Nfkb1,Notch1,Nr3c1,Nup98,Otc…	NA	NA	NA	NA	Bcl11a,Ccl5,Cd48,Cd84,Cdkn2a,Elk4,Ets1,Gimap1,Gimap5,H2-D1,Id3,Il21r,Il4ra,Itpkb,Ksr1,Lgals9,Ly9,Nfkbia,Notch1,Prkcq,Runx3,Socs1,Sp3,Stat1,Stat4,Tom1l2	NA	NA	Abcg1,Apoe,Arhgef6,Atm,B2m,B9d2,BC096441,Bcl2l11,C3ar1,Cbl,Ccr2,Ccr5,Ccr7,Cd19,Cd247,Cd274,Cd40lg,Cd44,Cflar,Chd2,Chd4,Clec4n,Csk,Ctcf,Ctsl,Diap1,Dll4,Ebi3,Esr2,Ets1,Fadd,Foxn1,Gadd45b,Gem,Git2,Gna13,Grap,Grap2,Grb2,H2-Aa,H2-Ab1,Id3,Ifngr2,Il17ra,Il21r,Il27,Il2rb,Il4,Il4ra,Il6,Il7r,Il9r,Itga4,Itgb2,Itgb7,Itk,Ksr1,Lat,Lcp2,Lep,Lepr,Lgals9,Map3k3,Mapk14,Mcl1,Mpz,Msi2,Mt1,Mt2,Myb,Myd88,Ncoa3,Nedd4,N…	NA
Mouse Phenotype	abnormal CD4-positive T cell number	0		0					4.05293e-95			0		Adam10,Apoe,B2m,B9d2,BC096441,Batf,Bcl11a,Ccl2,Ccl5,Ccnd1,Ccr2,Ccr7,Cd19,Cd247,Cd28,Cd3d,Cd3e,Cd48,Cd74,Cd79a,Cd83,Cd84,Cdkn2a,Cflar,Chd2,Col10a1,Cr1l,Ctcf,Diap1,Dll1,Dock2,Ebi3,Elavl1,Elk4,Ets1,Fadd,Foxn1,Foxo1,Gem,Gimap1,Gimap5,Git2,Gna13,Gpr30,Grap,Grap2,Grb2,H2-Aa,H2-Ab1,H2-D1,H2-K1,Id3,Ifngr1,Il21r,Il2ra,Il4ra,Il5ra,Il6st,Il9r,Irf1,Itgam,Itgb7,Itpkb,Lat,Lepr,Lgals9,Map3k3,Mcl1,Mmp9,Mpz,Msi2,…	NA	Adam10,Arhgef6,Asxl1,B2m,B9d2,BC096441,Bcl11a,Cbl,Ccr2,Ccr7,Cd19,Cd247,Cd40lg,Chi3l1,Col10a1,Cr1l,Ctcf,Ctla4,Diap1,Dll4,E2f1,Ebi3,Esr2,Foxp3,Fyn,Gata3,Git2,Gmnn,Grap2,Grb2,H2-K1,Icos,Id3,Il21r,Il2rb,Il2rg,Il4ra,Irf1,Itga4,Itgb2,Itpkb,Lat,Lcp2,Lepr,Lgals9,Map3k3,Mcl1,Mpz,Msi2,Myb,Nbn,Ncoa3,Nedd4,Nfatc2ip,Nfatc3,Nfkb1,Notch1,Nr3c1,Nup98,Otc,Pdcd1lg2,Pik3c2a,Ppm1d,Rag1,Rfx5,Rhoh,Rnf8,Rpl22,Runx1,Run…	NA	NA	NA	NA	Bcl11a,Ccl5,Cd48,Cd84,Cdkn2a,Elk4,Ets1,Gimap1,Gimap5,H2-D1,Id3,Il21r,Il4ra,Itpkb,Lgals9,Nfkbia,Notch1,Runx3,Socs1,Sp3,Stat1,Tom1l2	NA	NA	Abcg1,Apoe,Arhgef6,Atm,B2m,B9d2,BC096441,Bcl2l11,Cbl,Ccr2,Ccr7,Cd19,Cd247,Cd40lg,Cflar,Chd2,Ctcf,Ctsl,Diap1,Dll4,Ebi3,Esr2,Ets1,Fadd,Foxn1,Gem,Git2,Gna13,Grap,Grap2,Grb2,H2-Aa,H2-Ab1,Id3,Il21r,Il2rb,Il4ra,Il7r,Il9r,Itga4,Itgb2,Itgb7,Itk,Lat,Lcp2,Lep,Lepr,Lgals9,Map3k3,Mcl1,Mpz,Msi2,Mt1,Mt2,Myb,Ncoa3,Nedd4,Nfatc2ip,Nfatc3,Nfe2l2,Nfkb1,Notch1,Nr3c1,Pbx1,Pdcd1lg2,Pla2g10,Plcg1,Prnp,Rfx5,Rnf8,Rpl22,R…	NA
Mouse Phenotype	abnormal CD8-positive T cell morphology	0		0								0		Apoe,B2m,Bcl11a,Casp3,Ccr2,Ccr4,Ccr5,Cd19,Cd247,Cd28,Cd3d,Cd3e,Cd3g,Cd44,Cd74,Cd79a,Cdkn2a,Cflar,Cr1l,Ctcf,Cytip,Diap1,Dll1,Dock2,E2f2,Ebag9,Elavl1,Elk4,Ets1,Fadd,Foxn1,Foxo1,Gem,Gimap1,Gimap5,Git2,Gna13,Gpr30,Grap2,Grb2,H2-Aa,H2-Ab1,H2-D1,H2-K1,H2-T3,Hcst,Id3,Ifngr1,Il2ra,Il6st,Irf1,Itgam,Itpkb,Lat,Lepr,Lgals3,Map3k3,Mcl1,Mpz,Msi2,Mt1,Mt2,Myb,Myh9,Ncoa3,Nfkbia,Notch1,Nr3c1,Pbx1,Pdcd1,Pdcd1lg2,Pd…	NA	Arhgef6,B2m,Bcl11a,Casp3,Ccr2,Ccr5,Cd19,Cd247,Cd274,Cd44,Cr1l,Ctcf,Ctla4,Diap1,Dll4,Drosha,E2f1,E2f2,Ebag9,Esr2,Foxp3,Fyn,Gata3,Git2,Gmnn,Grap2,Grb2,Gzmb,H2-K1,Id3,Il2rb,Il2rg,Irf1,Itgb2,Itpkb,Lat,Lcp2,Lepr,Map3k3,Mcl1,Mpz,Msi2,Myb,Myh9,Ncoa3,Nedd4,Nfatc3,Nfkb1,Notch1,Nr3c1,Otc,Pdcd1lg2,Pik3c2a,Ppm1d,Psmb11,Ptger1,Rag1,Rcan1,Rhoh,Rnf8,Rpl22,Runx1,Runx3,S1pr1,Sash3,Sfpi1,Slco1a5,St8sia1,Stat5b,Sti…	NA	NA	NA	NA	NA	NA	NA	Abcg1,Apoe,Arhgef6,Atm,B2m,Bcl2l11,Casp3,Ccr2,Ccr5,Cd19,Cd247,Cd274,Cd44,Cflar,Chd4,Csk,Ctcf,Ctsl,Diap1,Dll4,Drosha,E2f2,Ebag9,Esr2,Ets1,Fadd,Foxn1,Gem,Git2,Gna13,Grap2,Grb2,Gzmb,H2-Aa,H2-Ab1,H2-T3,Id3,Il2rb,Il7r,Itgb2,Itk,Lat,Lcp2,Lepr,Ly75,Map3k3,Mcl1,Mpz,Msi2,Mt1,Mt2,Myb,Myh9,Ncoa3,Nedd4,Nfatc3,Nfkb1,Notch1,Nr3c1,Pbx1,Pdcd1lg2,Pdk1,Pgp,Pla2g10,Plcg1,Prnp,Psmb8,Psmb9,Ptger1,Rcan1,Rnf8,Rpl22,Run…	NA
Mouse Phenotype	abnormal CD8-positive T cell number	0		0								0		Apoe,B2m,Bcl11a,Ccr2,Ccr4,Cd19,Cd247,Cd28,Cd3d,Cd3e,Cd3g,Cd74,Cd79a,Cdkn2a,Cflar,Cr1l,Ctcf,Diap1,Dll1,Dock2,E2f2,Elavl1,Elk4,Ets1,Fadd,Foxn1,Foxo1,Gem,Gimap1,Gimap5,Git2,Gna13,Gpr30,Grap2,Grb2,H2-Aa,H2-Ab1,H2-D1,H2-K1,Hcst,Id3,Ifngr1,Il2ra,Il6st,Irf1,Itgam,Itpkb,Lat,Map3k3,Mcl1,Mpz,Msi2,Mt1,Mt2,Myb,Myh9,Ncoa3,Nfkbia,Notch1,Nr3c1,Pbx1,Pdcd1,Pdcd1lg2,Plcg1,Pnp,Ppm1d,Prf1,Psmb11,Psmb8,Psmb9,Rad52,Rh…	NA	Arhgef6,B2m,Bcl11a,Ccr2,Cd19,Cd247,Cd274,Cr1l,Ctcf,Ctla4,Diap1,Dll4,Drosha,E2f1,E2f2,Esr2,Foxp3,Fyn,Gata3,Git2,Gmnn,Grap2,Grb2,H2-K1,Id3,Il2rb,Il2rg,Irf1,Itgb2,Itpkb,Lat,Lcp2,Map3k3,Mcl1,Mpz,Msi2,Myb,Myh9,Ncoa3,Nedd4,Nfatc3,Nfkb1,Notch1,Nr3c1,Pdcd1lg2,Pik3c2a,Ppm1d,Psmb11,Rag1,Rhoh,Rnf8,Rpl22,Runx1,Runx3,S1pr1,Sfpi1,St8sia1,Stat5b,Stim1,Stim2,Stk4,Tapbp,Tbx21,Themis,Ticam1,Tom1l2,Vav1	NA	NA	NA	NA	NA	NA	NA	Abcg1,Apoe,Arhgef6,Atm,B2m,Bcl2l11,Ccr2,Cd19,Cd247,Cd274,Cflar,Chd4,Csk,Ctcf,Ctsl,Diap1,Dll4,Drosha,E2f2,Esr2,Ets1,Fadd,Foxn1,Gem,Git2,Gna13,Grap2,Grb2,H2-Aa,H2-Ab1,Id3,Il2rb,Il7r,Itgb2,Itk,Lat,Lcp2,Map3k3,Mcl1,Mpz,Msi2,Mt1,Mt2,Myb,Myh9,Ncoa3,Nedd4,Nfatc3,Nfkb1,Notch1,Nr3c1,Pbx1,Pdcd1lg2,Pla2g10,Plcg1,Prnp,Psmb8,Psmb9,Rnf8,Rpl22,Runx1,Runx3,S1pr1,Sfpi1,Sit1,Slfn2,Socs1,Spna1,St3gal1,St8sia1,Tap1,…	NA
Mouse Phenotype	abnormal cell-mediated immunity	0	0	0					0		3.83217e-226	0		AI848100,Abcc1,Abi1,Ada,Adam17,Adipoq,Adora2b,Adrb2,Aim2,Akt1,Akt3,Aoc3,Apoe,Appl1,Arhgdia,Arhgdib,Arhgef1,Arid3a,Arrb2,Atf3,Axl,B2m,B4galt1,BC096441,Bag4,Bak1,Batf,Batf3,Bax,Bcl10,Bcl3,Bik,Birc2,Birc3,Birc5,Bloc1s3,Braf,Brca2,Bst1,Camk2g,Card9,Casp3,Casp9,Ccl1,Ccl11,Ccl2,Ccl5,Ccr1,Ccr10,Ccr2,Ccr3,Ccr4,Ccr5,Ccr7,Cd19,Cd207,Cd22,Cd244,Cd247,Cd28,Cd38,Cd3e,Cd3g,Cd44,Cd48,Cd68,Cd69,Cd72,Cd74,Cd79a,C…	Abcc1,Abcg1,Abi1,Akt1,Apobec3,Arhgdia,Atf3,Batf3,Bbc3,Bcl6b,Birc2,Birc3,Birc5,Card9,Cd244,Cd47,Cd48,Cd84,Chrm1,Cnn2,Csf1,Csf3,Ctsl,Espn,Ets1,Fcgr1,Fgr,Fli1,Fos,Gm885,Gna12,Grk6,H2-D1,H2afx,Hps1,Hsh2d,Hsp90b1,Igj,Ikzf1,Inpp5d,Klf2,Lta,Ltb,Ly9,Map3k3,Me2,Mll5,Mmp28,Mt1,Mt2,Myo9b,Nfe2l2,Nlrp6,Notch2,Orai1,P2ry6,Pecam1,Pfn1,Pik3c2a,Ppia,Ppp2r3c,Prkcq,Psen1,Pstpip2,Ptger1,Ptprj,Rasa4,Rfk,Rhoh,Rpl22,Ru…	AI848100,Abca1,Abcc1,Abi1,Ada,Adora3,Adrb2,Alox5,Anxa5,Aoc3,Aplf,Apobec3,Arhgap15,Arhgef12,Arhgef6,Arid3a,Arntl,Axl,B2m,B3gnt2,B4galt1,BC096441,Bag4,Bank1,Bbs4,Bcl10,Bik,Birc2,Birc3,Blk,Bst1,C3,Camk2d,Camk2g,Card9,Casp3,Cbl,Ccr1,Ccr10,Ccr2,Ccr3,Ccr5,Ccr7,Ccrl2,Cd19,Cd200r1,Cd247,Cd274,Cd276,Cd38,Cd40lg,Cd44,Cd47,Cd68,Cd80,Cd81,Cdkn1b,Cebpb,Chi3l1,Chrm1,Clcn3,Clec4e,Cnpy3,Cnr2,Cops6,Crlf2,Cry2,Csf…	NA	NA	NA	NA	Adcy9,Akt1,Alox5ap,B3gnt2,Bach2,Ccl5,Cd244,Cd276,Cd48,Cd69,Cd84,Cebpb,Clec7a,Clec9a,Cnn2,Cnr2,Csf3r,Ctsc,Dusp2,Dusp4,E2f2,Ets1,F11r,Fads2,Fli1,Flot1,Flt1,Flt3,Fyb,Ggta1,Gimap1,Gimap4,Gimap5,H2-D1,Hsh2d,Icam2,Id3,Ier3,Ikzf1,Il12a,Il21r,Il4ra,Il6ra,Irf2,Itgb3,Itpkb,Klf2,Klra10,Klra17,Klre1,Ksr1,Lta,Ltb,Ly9,Lyn,Mbtps1,Mdc1,Mdm4,Mrc1,Myh9,Ncf1,Nfkbia,Nos2,Notch1,Panx1,Pik3r1,Pla2g4a,Plcg2,Prex1,Prkcq…	NA	AI848100,Adora3,Aim2,Arid3a,Bbc3,Blm,Ccr1,Ccr2,Ccr3,Ccr5,Cd47,Cnr2,Csf2rb,Csf2rb2,Dapp1,E2f2,Fasl,Ggta1,Hdac6,Id3,Ifngr2,Il2rb,Klf13,Ksr1,Lgmn,Mcph1,Mpo,Mxd1,Ncf4,Nos2,Padi4,Pdlim2,Pim2,Psap,Ptpn22,Ptprj,Rabgef1,Rap1a,Rfk,Rfx5,Runx1,Runx3,Sema4b,Sh2d2a,Spna1,Sucnr1,Suv420h2,Tnfrsf13c,Tspan32,Xcr1,Xrcc6	AI848100,Abca1,Abcc1,Abcg1,Acp5,Ada,Adcy9,Adora3,Adrb2,Aim2,Akt1,Alox5,Aoc3,Aplf,Apoe,Arhgap15,Arhgdib,Arhgef12,Arhgef6,Arntl,Atf3,Atm,Axl,B2m,B3gnt2,B4galt1,BC096441,Bak1,Batf3,Bax,Bcl10,Bcl2l11,Bik,Birc2,Birc3,Birc5,Blm,Bmpr1a,C3ar1,C5ar1,Cabin1,Camk2g,Casp1,Casp3,Casp7,Casp9,Cbl,Ccl17,Ccr1,Ccr10,Ccr2,Ccr3,Ccr5,Ccr7,Ccrl2,Cd19,Cd200r1,Cd226,Cd247,Cd274,Cd276,Cd40lg,Cd44,Cd47,Cd68,Cd72,Cd9,Cdkn1…	NA
Mouse Phenotype	abnormal circulating cytokine level	0							7.73036e-83			0		Adam17,Adora2b,Aim2,Apoe,Arhgdia,Arhgdib,Arrb2,Axl,Bag4,Ccl2,Ccr3,Cd19,Cd28,Cd44,Cebpb,Clic4,Cry2,Csf1,Csf1r,Ctsc,Cxcl16,Cxcl5,Cxcr2,Darc,Ebi3,Egr1,F3,Fasl,Flt3,Fos,Foxn1,Gimap5,Gnai2,Hexb,Ifnar1,Ifngr1,Il10ra,Il10rb,Il12rb2,Il4ra,Il6,Il6ra,Il6st,Inpp5d,Irak2,Irf1,Irgm1,Klra10,Klra17,Lepr,Lgals3bp,Lta,Map4k2,Mapkapk2,Mbl2,Mmp9,Mta2,Myd88,Ncoa3,Nfatc2ip,Nfe2l2,Nfkbia,Nlrp6,Parp1,Pglyrp2,Pilrb1,Pom…	NA	NA	NA	NA	NA	NA	Cebpb,Clic4,Ctsc,Flt3,Gimap5,Il12a,Il4ra,Il6ra,Klra10,Klra17,Lta,Nfkbia,Slamf6,Socs1,Stat1,Stat4,Tlr7,Tlr8,Tnf	NA	NA	Aim2,Apoe,Arhgdib,Axl,C3ar1,Casp1,Casp12,Casp4,Ccr3,Cd19,Cd44,Cebpb,Clic4,Cry2,Csf1,Ctse,Cxcl5,Darc,Ebi3,Egr1,Fasl,Flt3,Foxn1,Gata1,Gnai2,Ifnar1,Ifnar2,Igtp,Il10ra,Il10rb,Il12rb2,Il1a,Il1b,Il4ra,Il6,Inpp5d,Irak2,Irgm1,Itgb2,Lep,Lepr,Lgmn,Lif,Map4k2,Mapkapk2,Mcpt1,Mta2,Myd88,Ncoa3,Nfatc2ip,Nfe2l2,Nfkb1,Parp1,Prkce,Ptger4,Ptpn6,Rac2,Ramp1,Relb,Rps6ka4,Rsad2,Samsn1,Socs1,Stat3,Stat6,Tbk1,Tnfrsf1a,To…	NA
Mouse Phenotype	abnormal circulating interleukin level	0										0		Adam17,Adora2b,Aim2,Apoe,Arhgdia,Arhgdib,Arrb2,Bag4,Ccl2,Ccr3,Cd19,Cd28,Cd44,Cebpb,Clic4,Cry2,Ctsc,Cxcl16,Cxcl5,Cxcr2,Ebi3,F3,Flt3,Fos,Foxn1,Gimap5,Gnai2,Hexb,Ifnar1,Ifngr1,Il10ra,Il10rb,Il12rb2,Il4ra,Il6,Il6ra,Il6st,Inpp5d,Irak2,Irf1,Irgm1,Klra17,Lepr,Lgals3bp,Map4k2,Mbl2,Mmp9,Mta2,Myd88,Ncoa3,Nfatc2ip,Nfe2l2,Nfkbia,Nlrp6,Parp1,Pglyrp2,Pilrb1,Pomc,Ppia,Prkce,Ptpn6,Pycard,Rac2,Ramp1,Relb,Sele,Sel…	NA	NA	NA	NA	NA	NA	NA	NA	NA	Aim2,Apoe,Arhgdib,C3ar1,Casp1,Casp12,Casp4,Ccr3,Cd19,Cd44,Cebpb,Clic4,Cry2,Ctse,Cxcl5,Ebi3,Flt3,Foxn1,Gata1,Gnai2,Ifnar1,Ifnar2,Igtp,Il10ra,Il10rb,Il12rb2,Il1a,Il1b,Il4ra,Il6,Inpp5d,Irak2,Irgm1,Itgb2,Lepr,Lif,Map4k2,Mta2,Myd88,Ncoa3,Nfatc2ip,Nfe2l2,Nfkb1,Parp1,Prkce,Ptger4,Ptpn6,Rac2,Ramp1,Relb,Rps6ka4,Stat3,Tbk1,Tnfrsf1a,Tollip,Trafd1,Usp18	NA
Mouse Phenotype	abnormal circulating protein level	0										0		AI848100,Abcb4,Ace,Ada,Adam17,Adamts13,Adora2b,Agt,Agtr1b,Aim2,Ank,Apoe,Arhgdia,Arhgdib,Arrb2,Atp8b1,Axl,B2m,Bag4,Ccl2,Ccr2,Ccr3,Cd19,Cd28,Cd33,Cd44,Cebpa,Cebpb,Cfb,Chuk,Clic4,Cry2,Csf1,Csf1r,Ctsc,Cxcl16,Cxcl5,Cxcr2,Cyp27b1,Dag1,Darc,Dll1,Ebi3,Egr1,F3,Fadd,Faim3,Fasl,Fcgrt,Fech,Flt3,Fos,Foxn1,Ganc,Gimap5,Gnai2,Gne,Gnmt,Gtf3c2,Hexb,Hif1a,Hlx,Hmox2,Hpn,Idua,Ifnar1,Ifngr1,Ighmbp2,Il10ra,Il10rb,Il12r…	NA	NA	NA	NA	NA	NA	NA	NA	NA	AI848100,Abca1,Abcb4,Acaca,Ace,Ada,Agtr1b,Ahi1,Aim2,Aip,Ank,Apoe,Arhgdib,Arntl,Atp8b1,Axl,B2m,Bcmo1,C3ar1,Casp1,Casp12,Casp4,Ccr2,Ccr3,Cd19,Cd44,Cd59a,Cd59b,Cebpb,Clic4,Col4a3,Creb3l3,Cry2,Csf1,Ctse,Cxcl5,Cyp11b2,Cyp1a2,Dag1,Darc,Ebi3,Egr1,Eif2ak3,Esr2,F2,Fadd,Fasl,Fech,Flt3,Foxn1,Gata1,Gnai2,Gnmt,Hlx,Hnf1a,Hp,Hpn,Ifnar1,Ifnar2,Ighmbp2,Igtp,Il10ra,Il10rb,Il12rb2,Il1a,Il1b,Il4,Il4ra,Il6,Inpp5d,Ira…	NA
Mouse Phenotype	abnormal cytokine level	0		0					1.17349e-117			0		Ace,Adam17,Adora2b,Aim2,Apoe,Arhgdia,Arhgdib,Arrb2,Axl,B2m,Bag4,Card9,Cbs,Ccl2,Ccl3,Ccr2,Ccr3,Ccr5,Cd19,Cd28,Cd44,Cebpb,Clic4,Cpb2,Cry2,Csf1,Csf1r,Ctsc,Cxcl16,Cxcl5,Cxcr2,Cxcr3,Darc,Ebi3,Egr1,F2r,F3,Fasl,Flt3,Fos,Foxn1,Gimap5,Gnai2,Gp49a,Hexb,Hif1a,Icam1,Ido1,Ier3,Ifnar1,Ifngr1,Il10ra,Il10rb,Il12rb2,Il4ra,Il6,Il6ra,Il6st,Inpp5d,Irak2,Irf1,Irgm1,Itgav,Kit,Klra10,Klra17,Lepr,Lgals3bp,Lilrb4,Lta,Lyn…	NA	Ace,Axl,B2m,Bag4,C3,Card9,Ccr2,Ccr3,Ccr5,Cd19,Cd44,Cd47,Cebpb,Clic4,Cry2,Ctla4,Ctsc,Dusp1,Ebi3,Egr1,F2r,F2rl1,Fasl,Fcer1a,Flt3,Foxp3,Fyn,Gata1,Icam1,Icos,Ier3,Ifih1,Ifnar1,Ifnar2,Il10rb,Il1a,Il1b,Il4ra,Inpp5d,Irak2,Irf1,Irgm1,Itgav,Itgb2,Kit,Klra10,Klra17,Lepr,Map3k14,March7,Mcpt1,Mpz,Ncoa3,Nfatc2ip,Nfkb1,Ngfr,Nlrp6,Nr3c1,Otc,Plau,Prkab1,Ptpn6,Rac2,Rag1,Runx3,Samsn1,Spon2,Stat3,Stat5b,Tbx21,Tgfb1…	NA	NA	NA	NA	Ccl3,Cebpb,Clic4,Cpb2,Ctsc,F2r,Flt3,Gimap5,Ier3,Il12a,Il4ra,Il6ra,Klra10,Klra17,Lta,Lyn,Nfkbia,Pla2g4a,Runx3,Slamf6,Socs1,Stat1,Stat4,Tlr7,Tlr8,Tnf	NA	NA	Ace,Aim2,Apoe,Arhgdib,Axl,B2m,C3ar1,Casp1,Casp12,Casp4,Cbs,Ccr2,Ccr3,Ccr5,Cd19,Cd44,Cd47,Cebpb,Clic4,Cpb2,Cry2,Csf1,Ctse,Cxcl5,Darc,Ebi3,Egr1,F2r,Fasl,Flt3,Foxn1,Gata1,Gnai2,Htra2,Ier3,Ifih1,Ifnar1,Ifnar2,Igtp,Il10ra,Il10rb,Il12rb2,Il1a,Il1b,Il4ra,Il6,Inpp5d,Irak2,Irgm1,Itgb2,Lep,Lepr,Lgmn,Lif,Ltbr,Map4k2,Mapkapk2,March7,Mcpt1,Mpz,Mta2,Myd88,Ncoa3,Nfatc2ip,Nfe2l2,Nfkb1,Ngfr,Nr3c1,Parp1,Pla2g10,Pl…	NA
Mouse Phenotype	abnormal cytokine secretion	0		0					5.79696e-210			0		2610301G19Rik,Abi1,Adam17,Adora2b,Aim2,Apoe,Arrb2,Atf3,Atg9a,B2m,BC096441,Bag4,Batf,Bcl10,Bcl3,Birc3,Card9,Ccl2,Ccl5,Ccnd1,Ccr1,Ccr2,Ccr4,Ccr5,Cd19,Cd247,Cd28,Cd300lf,Cd44,Cd74,Cd79a,Cd80,Cd84,Cebpb,Clec4e,Clec4n,Clec7a,Clic4,Cnpy3,Comt,Creb1,Cry2,Cxcl16,Cxcr2,Dbnl,Def6,Dtx1,Dusp2,Dusp4,Ebi3,Elf1,Erap1,Ezr,F3,Fcer1g,Fcer2a,Fgr,Flt3,Fos,Foxn1,Gadd45b,Gimap5,Gna13,Gnai2,H2-Ab1,H2-T3,Hcst,Hif1a,Hrh1…	NA	Abca1,Abi1,Adora3,Anxa5,Arhgef6,Atg9a,B2m,B3gnt2,BC096441,Bag4,Bcl10,Birc3,C3,Card9,Cbl,Ccr1,Ccr2,Ccr5,Ccrl2,Cd19,Cd200r1,Cd247,Cd274,Cd276,Cd300lf,Cd44,Cd80,Cebpb,Chi3l1,Clec4e,Clec4n,Clic4,Cnpy3,Comt,Creb1,Crlf2,Cry2,Csf2rb,Csf2rb2,Ctla4,Cxcl9,Drosha,Dtx1,Dusp1,E2f1,Ebi3,Fastk,Fcer1a,Fgr,Flt3,Foxp3,Fyb,Fyn,Gata3,Gfi1,Gnai1,Hrh1,Hsh2d,Hspa1b,Icos,Ier3,Ifih1,Ifnar1,Ifnar2,Il10rb,Il1a,Il1b,Il21r,I…	NA	NA	NA	NA	Adora2a,B3gnt2,Ccl5,Cd276,Cd84,Cebpb,Clec7a,Clic4,Dusp2,Dusp4,Flt3,Fyb,Gimap5,Hivep3,Hsh2d,Ier3,Il12a,Il21r,Il4ra,Klf2,Klra10,Klra17,Ksr1,Litaf,Lta,Ly9,Mbtps1,Nos2,Notch1,Pla2g4a,Plcg2,Prkcq,Runx3,Slamf1,Slamf6,Socs1,Sqstm1,Stat1,Stat4,Sucnr1,Tlr7,Tlr8,Tnf,Ubash3a,Zc3h12a	NA	NA	Abca1,Abcg1,Adora3,Aim2,Apoe,Arhgef6,Atf3,Atg9a,B2m,B3gnt2,BC096441,Bcl10,Birc3,C3ar1,Cabin1,Casp1,Casp12,Cbl,Ccr1,Ccr2,Ccr5,Ccrl2,Cd19,Cd200r1,Cd226,Cd247,Cd274,Cd276,Cd44,Cebpb,Clec4e,Clec4n,Clic4,Cnpy3,Comt,Cry2,Csf2rb,Csf2rb2,Ctse,Ctss,Def6,Drosha,Dtx1,Ebi3,Elf1,Ezr,Fgr,Flt3,Foxn1,Fyb,Gadd45b,Gfi1,Gna13,Gnai1,Gnai2,Gnai3,H2-Ab1,H2-T3,Hivep3,Hrh1,Hsh2d,Hspa1b,Ier3,Ifih1,Ifna6,Ifnar1,Ifnar2,Il1…	NA
Mouse Phenotype	abnormal double-negative T cell morphology	0		0								0		Ada,Aff1,Akt1,Akt3,Apc,Bax,Bcl10,Bcl11a,Birc5,Braf,Casp3,Cd19,Cd247,Cd3e,Cd3g,Cd5l,Cdkn1b,Col10a1,Cops5,Cpa3,Crip3,Ctcf,Cxcr4,Dck,Dffb,Dmtf1,Elavl1,Elk4,Ets1,Fadd,Fasl,Fbxo30,Fcer1g,Fli1,Flt3,Flt3l,Fos,Foxn1,Gem,Gimap1,Gimap5,Gnai2,Grap2,Grb2,H2-Ab1,Ikzf1,Il6st,Ing1,Inpp5d,Jak1,Kit,Klf13,Lat,Maml1,Map3k3,Mapk14,Mcl1,Me2,Mll5,Msi2,Myb,Nfkbia,Nfkbie,Notch1,Notch3,Pbx1,Plcg1,Pnp,Ptch1,Ptcra,Rassf5,R…	NA	Ada,Aff1,Asxl1,Bcl10,Bcl11a,Casp3,Cbl,Cd19,Cd247,Cdkn1b,Col10a1,Cpa3,Ctcf,Ctla4,Dck,Dffb,Dll4,Drosha,E2f1,Fasl,Fbxo30,Flt3,Foxp3,Fyb,Fyn,Gadd45a,Gata3,Gfi1,Gmnn,Grap2,Grb2,Ikzf1,Il2rg,Inpp5d,Itgb2,Jak1,Kit,Klf13,Lat,Lcp2,Malt1,Map3k3,Mapk14,Mcl1,Mdm2,Me2,Mll5,Msi2,Myb,Nfatc3,Notch1,Ppp3r1,Ptcra,Rag1,Rhoh,Rnf8,Rpl22,Runx1,Sfpi1,Stat3,Stat5b,Stk4,Tet2,Themis,Trp53,Vav1,Xrcc6	NA	NA	NA	NA	NA	NA	NA	Ada,Aff1,Akt1,Atm,Bax,Bcl10,Bcl2l11,Birc5,Casp3,Cbl,Cd19,Cd247,Cdkn1b,Chd4,Chek2,Cpa3,Ctcf,Dicer1,Dll4,Drosha,E2f4,Ets1,Fadd,Fasl,Fli1,Flt3,Flt3l,Foxn1,Fyb,Gadd45a,Gem,Gfi1,Gnai2,Grap2,Grb2,H2-Ab1,Ikzf1,Il7r,Inpp5d,Itgb2,Itk,Jak1,Klf13,Lat,Lcp2,Maml1,Map3k3,Mapk14,Mcl1,Me2,Msi2,Myb,Nfatc3,Nkx3-1,Notch1,Notch3,Pbx1,Plcg1,Prnp,Ptcra,Ptk2,Rnf8,Rpl22,Runx1,Sfpi1,Socs1,Stat3,Tacc3,Tap1,Tcf3,Tet2,Themi…	NA
Mouse Phenotype	abnormal double-positive T cell morphology	0		0								0		Ada,Adam10,Aff1,Akt1,Akt3,Arhgdia,Arhgdib,B2m,BC096441,Bcl10,Birc5,Cd247,Cd3e,Cd5l,Cd79a,Cd80,Cdkn2a,Col10a1,Cops5,Cpa3,Ctcf,Cxcr4,Dck,Dffb,Dock2,Elavl1,Ets1,Ewsr1,Fadd,Fbxo30,Flt3,Fos,Foxn1,Foxo1,Gem,Grap2,Grb2,Id3,Ikzf1,Il6st,Irf1,Itpkb,Kit,Klf13,Lat,Map3k3,Mcl1,Me2,Mll5,Msi2,Myb,Nfkbia,Notch1,Pgp,Pla2g6,Plcg1,Pnp,Psme3,Ptch1,Ptcra,Rhoh,Rnf8,Runx1,Runx3,Sfpi1,Sgpl1,Sirt6,Sit1,Sos1,Stk17b,Suv420…	NA	Ada,Adam10,Aff1,B2m,BC096441,Bcl10,Cd247,Cd40lg,Cd80,Col10a1,Cpa3,Ctcf,Ctla4,Ctsd,Dck,Dffb,Dll4,Drosha,E2f1,Esr2,Ewsr1,Fbxo30,Flt3,Foxp3,Fyn,Gata3,Gmnn,Grap2,Grb2,Id3,Ikzf1,Il2rb,Il2rg,Irf1,Itgb2,Itpkb,Kit,Klf13,Lat,Lcp2,Map3k3,Mcl1,Mdm2,Me2,Mll5,Msi2,Myb,Nfatc3,Nfkb1,Notch1,Pla2g6,Psme3,Ptcra,Rag1,Rhoh,Rnf8,Runx1,Runx3,Sash3,Sfpi1,Themis,Trp53,Vav1,Xrcc6	NA	NA	NA	NA	NA	NA	NA	Ada,Aff1,Akt1,Arhgdib,Atm,B2m,BC096441,Bcl10,Bcl2l11,Birc5,Cd247,Cd40lg,Chd4,Cpa3,Ctcf,Ctsd,Ctse,Dll4,Drosha,E2f4,Esr2,Ets1,Ewsr1,Fadd,Flt3,Foxn1,Gem,Grap2,Grb2,Hivep3,Htra2,Id3,Ikzf1,Il2rb,Il7r,Itgb2,Itk,Klf13,Lat,Lcp2,Map3k3,Mcl1,Me2,Msi2,Myb,Nfatc3,Nfkb1,Notch1,Pgp,Plcg1,Prnp,Psme3,Ptcra,Ptk2,Rnf8,Runx1,Runx3,Sash3,Sfpi1,Sirt6,Sit1,Slc46a2,Suv420h2,Tcf3,Themis,Traf2,Twsg1,Vav1,Vav2,Vav3,Was,Xr…	NA
Mouse Phenotype	abnormal effector T cell morphology	0		0					1.44333e-137			0		Adam10,Aff1,Apc,Apoe,Arhgdia,Arhgdib,B2m,B9d2,BC096441,Batf,Bcl11a,Casp3,Ccl2,Ccl25,Ccl5,Ccnd1,Ccr2,Ccr4,Ccr5,Ccr7,Cd19,Cd247,Cd28,Cd3d,Cd3e,Cd3g,Cd44,Cd48,Cd74,Cd79a,Cd83,Cd84,Cdkn2a,Cflar,Chd2,Clec4n,Col10a1,Cops5,Cpa3,Cr1l,Ctcf,Cytip,Diap1,Dll1,Dock2,E2f2,Ebag9,Ebi3,Elavl1,Elk4,Ets1,Fadd,Fbxo30,Fcer1g,Foxn1,Foxo1,Gadd45b,Gem,Gimap1,Gimap5,Git2,Gna13,Gnai2,Gpr30,Grap,Grap2,Grb2,H2-Aa,H2-Ab1,H2-…	NA	Adam10,Aff1,Arhgef6,Asxl1,B2m,B9d2,BC096441,Bcl11a,Casp3,Cbl,Ccr2,Ccr5,Ccr7,Cd19,Cd247,Cd274,Cd40lg,Cd44,Chi3l1,Clec4n,Col10a1,Cpa3,Cr1l,Crlf2,Ctcf,Ctla4,Diap1,Dll4,Drosha,E2f1,E2f2,Ebag9,Ebi3,Esr2,Fbxo30,Foxp3,Fyn,Gata3,Git2,Gmnn,Grap2,Grb2,Gzmb,H2-K1,Icos,Id3,Ifngr2,Il21r,Il2rb,Il2rg,Il4,Il4ra,Irf1,Itga4,Itgb2,Itpkb,Klf2,Ksr1,Lat,Lat2,Lcp2,Lepr,Lgals9,Map3k14,Map3k3,Mapk14,Mcl1,Mpz,Msi2,Myb,Myh…	NA	NA	NA	NA	Bcl11a,Ccl5,Cd48,Cd84,Cdkn2a,E2f2,Elk4,Ets1,Gimap1,Gimap5,H2-D1,Id3,Il21r,Il4ra,Itpkb,Klf2,Ksr1,Lgals9,Ly9,Myh9,Nfkbia,Nos2,Notch1,Prkcq,Runx3,Socs1,Sp3,Stat1,Stat4,Tnf,Tom1l2,Txnip	NA	NA	Abcg1,Aff1,Apoe,Arhgdib,Arhgef6,Atm,B2m,B9d2,BC096441,Bcl2l11,C3ar1,Casp3,Cbl,Ccr2,Ccr5,Ccr7,Cd19,Cd247,Cd274,Cd40lg,Cd44,Cflar,Chd2,Chd4,Clec4n,Cpa3,Csk,Ctcf,Ctsl,Diap1,Dicer1,Dll4,Drosha,E2f2,Ebag9,Ebi3,Esr2,Ets1,Fadd,Foxn1,Gadd45b,Gem,Git2,Gna13,Gnai2,Grap,Grap2,Grb2,Gzmb,H2-Aa,H2-Ab1,H2-T3,Htra2,Id3,Ifngr2,Il17ra,Il21r,Il27,Il2rb,Il4,Il4ra,Il6,Il7r,Il9r,Itga4,Itgb2,Itgb7,Itk,Klf2,Ksr1,Lat,Lcp…	NA
Mouse Phenotype	abnormal erythrocyte morphology	0		0						0	1.04416e-146	0		Ace,Ada,Adam17,Adamts13,Amhr2,Apc,Apoe,Aprt,Arf6,B2m,B4galt1,Bak1,Bax,Bcl11a,Bin3,Braf,Cbfa2t3,Ccnd1,Ccnd2,Cd33,Cd74,Cdk4,Cebpa,Cflar,Ciapin1,Clec1b,Col4a1,Col4a2,Csf1,Ctnna2,Ctnnb1,Dffb,Diap1,Egr1,Eif2ak1,Eif2c2,Eng,Ep400,Erg,Exoc6,Fadd,Fasl,Fbln1,Fbn1,Fbxo30,Fcer1g,Fcgr1,Fcgr2b,Fcgr3,Fech,Fli1,Flt3,Fshr,Gapdh,Gapdh,Gapdh,Gem,Gimap5,Gpi1,Gtf3c2,H2-Ab1,Hamp,Hfe,Hfe2,Hif1a,Hk1,Hlx,Hpse,Hyal2,Ifnar…	NA	2010002N04Rik,Ace,Ada,Add1,Add2,Agtr1a,Alas2,Amhr2,Aprt,Aqp2,Arid4b,Avpr2,B2m,B4galt1,Bcl11a,Bnip3l,C1galt1,C3,Cbfa2t3,Ccnd2,Cd47,Cd59a,Cd59b,Ctnnb1,Ctsg,Dffb,Diap1,Dkc1,Egr1,Eif2c2,Eif2s1,Eng,Epb4.2,Epor,Erf,Erg,Esr2,Exoc6,Fasl,Fbn1,Fbxo30,Fcgr2b,Fcgr3,Fech,Fgg,Flt3,Foxo3,Foxp3,Gapdh,Gapdh,Gapdh,Gata1,Gata3,Gata4,Gmnn,Gtf3c2,Gypa,Hbb-b1,Hfe,Hgf,Hmgb3,Id1,Ifnar1,Igf2bp1,Igf2r,Ikzf1,Il10rb,Il2rb,I…	NA	NA	NA	NA	NA	Add2,Alas2,Aprt,B2m,B4galt1,Bcl11a,Cbfa2t3,Cd47,Cd59a,Cd59b,Cul4a,Dnase2a,Dph1,Egr1,Eif2c2,Epb4.2,Fbxo30,Fech,Foxo3,Gata1,Gfi1b,Gypa,Hba-a2,Hba-x,Hbb-b1,Hfe,Hk1,Hyal2,Ifnar1,Ikzf1,Il10rb,Il2rb,Kcnn4,Klf1,Klf13,Mafk,Mapk14,Mdm2,Nkx3-1,Nprl3,Nr2c1,Pcid2,Pfdn1,Pim1,Pim2,Pklr,Prkaa1,Prkcd,Rpsa,Sipa1,Slc20a1,Slc25a37,Slc40a1,Slc4a1,Spna1,Spnb1,Stk11,Tmod1,Tmprss6,Trp53,Tspan33,Tusc2,Txnrd2,Wdr1	2010002N04Rik,Aprt,Bbc3,Bin3,Blm,Cbfa2t3,Cd47,Epor,Fasl,Gata1,Gfi1b,Hlx,Il2rb,Itga2b,Klf13,Lgmn,Mafk,Nfe2,Pim2,Ppp1r15a,Ptprj,Runx1,Sap30bp,Spna1,Tfrc,Thoc5,Tmprss6,Zfpm1	Ace,Ada,Add1,Add2,Alas2,Apoe,Aprt,Aqp1,Arf6,Arhgap1,Arid4a,Arid4b,Atm,B2m,B4galt1,Bak1,Bax,Bcl2l11,Blm,C1galt1,Capns1,Cbfa2t3,Cby1,Ccna2,Ccnd2,Ccne1,Cd47,Cd59a,Cd59b,Cflar,Chek2,Csf1,Ctsg,Diap1,Dicer1,Dkc1,Dph1,E2f4,Egln3,Egr1,Eif2ak1,Eif2c2,Eif2s1,Ep400,Erf,Erg,Esr2,Exoc6,Fadd,Fasl,Fcgr1,Fcgr2b,Fcgr3,Fech,Fermt3,Fli1,Flt1,Flt3,Foxo3,Gata1,Gata2,Gem,Gfi1b,Gpi1,H2-Ab1,Hba-a2,Hba-x,Hbb-b1,Hfe,Hfe2,…	NA
Mouse Phenotype	abnormal erythropoiesis	0		0						0	5.68835e-160	0		Ace,Ada,Adam17,Adamts13,Amhr2,Apc,Apoe,Aprt,Arf6,Arid3a,B2m,B4galt1,Bak1,Bax,Bcl11a,Bin3,Braf,Cbfa2t3,Ccnd1,Ccnd2,Cd33,Cd34,Cd74,Cdk4,Cdkn2b,Cebpa,Cflar,Chd2,Ciapin1,Clec1b,Col10a1,Col4a1,Col4a2,Csf1,Ctnna2,Ctnnb1,Dck,Dffb,Diap1,Dok2,Dyrk3,Eed,Egr1,Eif2ak1,Eif2c2,Elavl1,Eng,Ep400,Erg,Exoc6,Fadd,Fasl,Fbln1,Fbn1,Fbxo30,Fcer1g,Fcgr1,Fcgr2b,Fcgr3,Fech,Fli1,Flt3,Foxn1,Fshr,Gapdh,Gapdh,Gapdh,Gem,Gimap5…	NA	2010002N04Rik,Ace,Ada,Add1,Add2,Agtr1a,Alas2,Amhr2,Aprt,Aqp2,Arid3a,Arid4b,Avpr2,B2m,B4galt1,Bcl11a,Bnip3l,C1galt1,C3,Cbfa2t3,Ccnd2,Cd47,Cd59a,Cd59b,Col10a1,Ctnnb1,Ctsg,Dck,Dffb,Diap1,Dkc1,Dyrk3,Egr1,Eif2c2,Eif2s1,Eng,Epb4.2,Epor,Erf,Erg,Esr2,Exoc6,Fasl,Fbn1,Fbxo30,Fcgr2b,Fcgr3,Fech,Fgg,Flt3,Foxo3,Foxp3,Gapdh,Gapdh,Gapdh,Gata1,Gata3,Gata4,Gmnn,Gtf3c2,Gypa,Hbb-b1,Hfe,Hgf,Hmgb3,Icam4,Id1,Ifnar1,Igf…	NA	NA	NA	NA	NA	Add2,Alas2,Aprt,B2m,B4galt1,Bcl11a,Cbfa2t3,Cd47,Cd59a,Cd59b,Cul4a,Dnase2a,Dph1,Egr1,Eif2c2,Epb4.2,Fbxo30,Fech,Foxo3,Gata1,Gfi1b,Gypa,Hba-a2,Hba-x,Hbb-b1,Hfe,Hk1,Hyal2,Icam4,Ifnar1,Ikzf1,Il10rb,Il2rb,Itga4,Kcnn4,Klf1,Klf13,Mafk,Mapk14,Mdm2,Myc,Nkx3-1,Nprl3,Nr2c1,Pcid2,Pfdn1,Pim1,Pim2,Pklr,Prkaa1,Prkcd,Rpsa,Sac3d1,Sipa1,Slc19a1,Slc20a1,Slc25a37,Slc40a1,Slc4a1,Spna1,Spnb1,Stk11,Tmod1,Tmprss6,Trp53,T…	2010002N04Rik,Aprt,Arid3a,Bbc3,Bin3,Blm,Cbfa2t3,Cd47,Dyrk3,Epor,Fasl,Fzr1,Gata1,Gfi1b,Hlx,Il2rb,Itga2b,Klf13,Lgmn,Mafk,Nfe2,Pim2,Ppp1r15a,Ptprj,Runx1,Sap30bp,Spna1,Tfrc,Thoc5,Tmprss6,Zfpm1	Ace,Ada,Add1,Add2,Alas2,Apoe,Aprt,Aqp1,Ar,Arf6,Arhgap1,Arid4a,Arid4b,Atm,B2m,B4galt1,Bak1,Bax,Bcl2l11,Blm,C1galt1,Capns1,Cbfa2t3,Cby1,Ccna2,Ccnd2,Ccne1,Cd47,Cd59a,Cd59b,Cflar,Chd2,Chek2,Csf1,Ctsg,Diap1,Dicer1,Dkc1,Dok1,Dph1,E2f4,Egln3,Egr1,Eif2ak1,Eif2c2,Eif2s1,Ep400,Erf,Erg,Esr2,Exoc6,Fadd,Fasl,Fcgr1,Fcgr2b,Fcgr3,Fech,Fermt3,Fli1,Flt1,Flt3,Foxn1,Foxo3,Fzr1,Gata1,Gata2,Gem,Gfi1b,Gpi1,H2-Ab1,Hba-a…	NA
Mouse Phenotype	abnormal granulocyte morphology	0		0								0		Ada,Adam17,Arhgdia,Arhgdib,Atp7b,B4galt1,Bik,C4b,Casp3,Ccl11,Ccl2,Ccl3,Ccnd1,Ccr1,Ccr2,Ccr3,Ccr4,Cd19,Cd34,Cd44,Cd74,Cd97,Cebpa,Cebpe,Cerk,Cflar,Chst15,Clec4e,Cpa3,Csf1,Csf1r,Csf3r,Ctnnb1,Cxcl15,Cxcl5,Cxcr2,Diap1,Dok2,Egr1,Elavl1,F3,Fasl,Fbn1,Fcgr3,Fli1,Flt3,Flt3l,Foxn1,Fut4,Fut7,G6pc3,Gcnt4,Gem,Gimap5,Git2,Gnai2,Gnmt,Gsx1,Icam1,Ier3,Ikzf1,Il10rb,Il17ra,Il21r,Il4ra,Il5ra,Il6st,Inpp5d,Irf8,Itgam,I…	NA	2010002N04Rik,Abhd5,Ada,Arhgap15,Arid4b,Arntl,B4galt1,Bik,Blk,C3,C4b,Casp3,Ccr1,Ccr2,Ccr3,Cd19,Cd44,Cd47,Cd97,Cerk,Clec4e,Cpa3,Csf2rb,Ctnnb1,Diap1,Drosha,Dusp1,Egr1,Esr2,Fasl,Fastk,Fbn1,Fcer1a,Fcgr3,Flt3,Foxp3,Gab2,Gadd45a,Gata1,Gcnt4,Gfi1,Git2,Gmnn,Gnmt,Gsx1,Icam1,Id1,Ier3,Ikzf1,Il10rb,Il21r,Il2rb,Il2rg,Il4,Il4ra,Inpp5d,Irak3,Itgb2,Kit,Lat,Lbr,Lepr,Ltb4r1,Map3k14,Mcl1,Mcpt1,Mcpt8,Mdm2,Mll5,Msi2,…	NA	NA	NA	NA	NA	NA	NA	Abcg1,Abhd5,Ada,Arhgap15,Arhgdib,Arid4a,Arid4b,Arntl,B4galt1,Bcl2l11,Bik,C3ar1,Casp3,Ccr1,Ccr2,Ccr3,Cd19,Cd44,Cd47,Cd97,Cebpe,Cerk,Cflar,Chst15,Clec4e,Cpa3,Csf1,Csf2rb,Csf3,Csf3r,Ctse,Ctss,Cxcl15,Cxcl5,Diap1,Dicer1,Dok1,Drosha,E2f4,Egr1,Esr2,Fasl,Fcgr3,Fli1,Flt3,Flt3l,Foxn1,Fut7,Gab2,Gadd45a,Gata1,Gcnt4,Gem,Gfi1,Git2,Gnai2,Gnmt,Gsx1,Id1,Ier3,Ikzf1,Il10rb,Il17ra,Il21r,Il2rb,Il4,Il4ra,Inpp5d,Irak3,…	NA
Mouse Phenotype	abnormal granulocyte physiology	0		0					1.41025e-87			0		Abcc1,Apoe,Arhgef1,B4galt1,Ccl11,Ccl2,Ccr1,Ccr3,Cd44,Cd69,Cebpe,Chuk,Clec7a,Csf3r,Ctsc,Cxcl5,Cxcr2,Dock2,Dok2,Dusp2,Espn,Fcer1g,Fcer2a,Fcgr1,Fcgr2b,Fcgr3,Fgr,Flot1,Fut4,Fut7,G6pc3,Git2,Gm885,Gnai2,Gp49a,Icam1,Il12rb2,Il17ra,Il21r,Il6,Inpp5d,Itgam,Kit,Lat,Lat2,Lgals3,Lilrb4,Lyn,Mcl1,Mll5,Mmp9,Mpo,Myd88,Myo1f,Ndst2,Npr1,Orai1,Padi4,Pde4b,Pim1,Pip5k1b,Pla2g4a,Plac8,Plau,Plaur,Plcb2,Pram1,Prex1,Prkcd…	NA	Abcc1,Adora3,Alox5,Arhgap15,B4galt1,C3,Ccr1,Ccr3,Cd44,Cd47,Chi3l1,Clcn3,Csf2rb,Csf2rb2,Ctsc,Cybb,Dusp1,Espn,Fastk,Fcer1a,Fcgr2b,Fcgr3,Fgg,Fgr,Flot1,Fyn,Gab2,Git2,Icam1,Icam2,Il1a,Il1b,Il21r,Il2rg,Il4,Inpp5d,Itgb2,Kit,Lat,Lat2,Ltb4r1,Mcl1,Mcpt4,Mll5,Mpo,Mpp1,Ms4a2,Ncf4,Ndst2,Padi4,Pim1,Pip5k1b,Plac8,Plau,Rac2,Rap1a,Retnla,Rgs13,Rhoh,Sac3d1,Stat5b,Stim1,Tax1bp1,Tpsab1,Tpsb2,Vav1	NA	NA	NA	NA	Alox5ap,Cd69,Clec7a,Csf3r,Ctsc,Dusp2,Flot1,Icam2,Il21r,Lyn,Ncf1,Pla2g4a,Prex1,Rab27a,Rgs13,Slamf6,Tnf,Vamp8	NA	NA	Abcc1,Adora3,Alox5,Apoe,Arhgap15,B4galt1,C3ar1,C5ar1,Casp1,Ccr1,Ccr3,Cd44,Cd47,Cebpe,Clcn3,Csf2rb,Csf2rb2,Csf3,Csf3r,Csk,Cxcl5,Cyba,Espn,Fcgr1,Fcgr2b,Fcgr3,Fgr,Flot1,Fut7,Gab2,Git2,Gnai2,Icam2,Il12rb2,Il17ra,Il1a,Il1b,Il21r,Il4,Il6,Inpp5d,Itgb2,Lat,Ltb4r1,Mcl1,Mcpt4,Mpo,Mpp1,Ms4a2,Myd88,Ncf4,Ndst2,Orai1,Padi4,Pim1,Pip5k1b,Pla2g10,Plac8,Plau,Plaur,Prkcd,Rac2,Rap1a,Relb,Rgs13,Rock2,Selplg,Slc37a4,S…	NA
Mouse Phenotype	abnormal hematopoiesis	0		0					0	0	0	0		1190003J15Rik,AI848100,Abi1,Ace,Ada,Adam10,Adam17,Adamts13,Adipoq,Adrb2,Aff1,Aim2,Akt1,Akt3,Amhr2,Ank,Ankrd11,Ap3d1,Apc,Apoa1,Apoa4,Apoc3,Apoe,Appl1,Aprt,Arf6,Arhgdia,Arhgdib,Arhgef1,Arid3a,Arsa,Atp7b,Axl,B2m,B4galt1,B9d2,BC096441,Bak1,Batf,Batf3,Bax,Bcl10,Bcl11a,Bcl3,Bik,Bin3,Birc2,Birc3,Birc5,Braf,Brca2,Bst1,C4b,Carm1,Casp3,Cbfa2t3,Cbs,Ccl11,Ccl2,Ccl25,Ccl3,Ccl5,Ccl7,Ccm2,Ccnd1,Ccnd2,Ccr1,Ccr10…	NA	1190003J15Rik,2010002N04Rik,AI848100,Abca1,Abhd5,Abi1,Ace,Ada,Adam10,Add1,Add2,Adrb2,Aff1,Agtr1a,Alas2,Amhr2,Ank,Ankrd11,Aplf,Aprt,Aqp2,Arhgap15,Arhgef12,Arhgef6,Arid3a,Arid4b,Arntl,Asxl1,Avpr2,Axl,B2m,B3gnt2,B4galt1,B9d2,BC096441,Bank1,Bcl10,Bcl11a,Bik,Birc2,Birc3,Blk,Bnip3l,Bst1,Btrc,C1galt1,C3,C4b,Casp3,Cbfa2t3,Cbl,Ccnd2,Ccr1,Ccr10,Ccr2,Ccr3,Ccr5,Ccr7,Cd19,Cd247,Cd24a,Cd274,Cd276,Cd40lg,Cd44,C…	NA	NA	NA	NA	Akt1,B3gnt2,Bach2,Bcl11a,Ccl3,Ccl5,Cd276,Cd48,Cd69,Cd84,Cdkn2a,Cdkn2b,Cebpb,Chst3,Clec1b,Clec2d,Cnn2,Csf3r,Dock8,E2f2,Egln3,Elk4,Ern1,Ets1,Fli1,Flt1,Flt3,Fyb,Gapdh,Ggta1,Gimap1,Gimap5,Gsx1,H2-D1,Hbb-b1,Hivep3,Hmga1,Hps5,Hsh2d,Id3,Ier3,Ikzf1,Il21r,Il4ra,Irf2,Itgb3,Itpkb,Klf2,Klhl6,Klra17,Ksr1,Lgals9,Lta,Ltb,Ly9,Lyn,Mafk,Mdc1,Mdm4,Myh9,Nfkbia,Nos2,Notch1,Pdgfb,Pik3r1,Pla2g4a,Plcg2,Pou2f1,Ppp1r15b,P…	Add2,Adrb2,Aim2,Alas2,Ankrd11,Aprt,Arhgef12,B2m,B4galt1,Bcl10,Bcl11a,Bik,Birc2,Birc3,Carm1,Cbfa2t3,Cd24a,Cd47,Cd59a,Cd59b,Cerk,Cno,Comt,Crh,Csf2rb,Csf2rb2,Cul4a,Cx3cl1,Cx3cr1,Dapp1,Dnase2a,Dph1,Dusp1,Egr1,Eif2c2,Epb4.2,Fbxo30,Fech,Foxo3,Gadd45a,Gata1,Gfi1b,Gnai2,Gypa,Hba-a2,Hba-x,Hbb-b1,Hfe,Hk1,Hps6,Hr,Hyal2,Icam1,Icam4,Ier3,Ifnar1,Ifnar2,Igf1r,Ikzf1,Il10rb,Il21r,Il2rb,Il4ra,Itga4,Jak1,Kcnn4,Kdr,…	2010002N04Rik,AI848100,Aim2,Ankrd11,Aprt,Arid3a,Bbc3,Bin3,Blm,Cbfa2t3,Ccr1,Ccr2,Ccr3,Ccr5,Cd47,Chst3,Csf2rb,Csf2rb2,Dapp1,Dyrk3,E2f2,Epor,Fasl,Fzr1,Gata1,Gfi1b,Ggta1,Hlx,Id3,Ifngr2,Il2rb,Itga2b,Klf13,Ksr1,Lbr,Lgals9,Lgmn,Lyl1,Mafk,Mpo,Mtf1,Mxd1,Naglu,Nfe2,Nos2,Pim2,Ppp1r15a,Psap,Ptpn22,Ptprj,Rabgef1,Rap1a,Rfx5,Runx1,Runx3,Sap30bp,Sh2d2a,Spna1,St3gal1,Sucnr1,Suv420h2,Tac4,Tfrc,Thoc5,Tmprss6,Tnfrsf…	AI848100,Abca1,Abcg1,Abhd5,Ace,Ada,Add1,Add2,Adrb2,Aff1,Aim2,Akt1,Alas2,Ank,Ankrd11,Aplf,Apoa1,Apoa4,Apoc3,Apoe,Aprt,Aqp1,Ar,Arf6,Arhgap1,Arhgap15,Arhgdib,Arhgef12,Arhgef6,Arid4a,Arid4b,Arntl,Arsa,Atm,Axl,B2m,B3gnt2,B4galt1,B9d2,BC096441,Bak1,Batf3,Bax,Bcl10,Bcl2l11,Bik,Birc2,Birc3,Birc5,Blm,Bmpr1a,C1galt1,C3ar1,Capns1,Casp3,Cbfa2t3,Cbl,Cbs,Cby1,Ccna2,Ccnd2,Ccne1,Ccr1,Ccr10,Ccr2,Ccr3,Ccr5,Ccr7,Cd…	NA
Mouse Phenotype	abnormal hematopoietic cell number	0		0					0	0	2.92379e-239	0		1190003J15Rik,AI848100,Ace,Ada,Adam10,Adam17,Adamts13,Adipoq,Aff1,Aim2,Akt1,Akt3,Ankrd11,Apc,Apoa1,Apoa4,Apoc3,Apoe,Arhgdia,Arhgdib,Arhgef1,Arid3a,Atp7b,Axl,B2m,B4galt1,B9d2,BC096441,Bak1,Batf,Batf3,Bax,Bcl10,Bcl11a,Bcl3,Bik,Birc2,Birc3,Birc5,Braf,Brca2,Bst1,C4b,Casp3,Cbfa2t3,Ccl11,Ccl2,Ccl25,Ccl3,Ccl5,Ccnd1,Ccnd2,Ccr1,Ccr10,Ccr2,Ccr3,Ccr4,Ccr5,Ccr7,Cd19,Cd207,Cd22,Cd247,Cd24a,Cd28,Cd33,Cd34,Cd3d…	NA	1190003J15Rik,2010002N04Rik,AI848100,Abca1,Ace,Ada,Adam10,Add1,Add2,Aff1,Agtr1a,Alas2,Ankrd11,Arhgap15,Arhgef6,Arid3a,Arid4b,Arntl,Asxl1,Axl,B2m,B4galt1,B9d2,BC096441,Bank1,Bcl10,Bcl11a,Bik,Birc2,Birc3,Blk,Bnip3l,Bst1,C1galt1,C3,C4b,Casp3,Cbfa2t3,Cbl,Ccnd2,Ccr1,Ccr10,Ccr2,Ccr3,Ccr5,Ccr7,Cd19,Cd247,Cd24a,Cd274,Cd40lg,Cd44,Cd47,Cd59a,Cd59b,Cd80,Cd81,Cd97,Cdkn1b,Cebpb,Cerk,Chi3l1,Chst3,Clec4e,Clic1,…	NA	NA	NA	NA	Akt1,Bach2,Bcl11a,Ccl3,Ccl5,Cd48,Cd69,Cd84,Cdkn2a,Cdkn2b,Cebpb,Chst3,Clec1b,Clec2d,Cnn2,Csf3r,Dock8,E2f2,Egln3,Elk4,Ets1,Fli1,Flt1,Flt3,Fyb,Ggta1,Gimap1,Gimap5,Gsx1,H2-D1,Hbb-b1,Hivep3,Id3,Ier3,Ikzf1,Il21r,Il4ra,Irf2,Itgb3,Itpkb,Klf2,Klhl6,Klra17,Lgals9,Lta,Ltb,Lyn,Mafk,Mdm4,Myh9,Nfkbia,Nos2,Notch1,Pdgfb,Pik3r1,Pla2g4a,Plcg2,Ppp1r15b,Prex1,Prkcq,Rgs1,Runx3,Serpinb2,Sin3b,Slc46a2,Socs1,Sp3,Sqstm1,…	Add2,Aim2,Alas2,Ankrd11,B2m,B4galt1,Bcl10,Bcl11a,Bik,Birc2,Birc3,Cbfa2t3,Cd24a,Cd47,Cd59a,Cd59b,Cerk,Csf2rb,Cul4a,Cx3cl1,Cx3cr1,Dapp1,Dnase2a,Dusp1,Egr1,Eif2c2,Epb4.2,Fbxo30,Fech,Foxo3,Gadd45a,Gata1,Gfi1b,Gnai2,Hba-a2,Hba-x,Hbb-b1,Hk1,Hr,Hyal2,Icam1,Ier3,Ifnar1,Ifnar2,Igf1r,Ikzf1,Il10rb,Il21r,Il2rb,Il4ra,Itga4,Jak1,Klf1,Klf13,Lat2,Lyve1,Mafk,Mapk14,Mdm2,Mtf1,Mxd1,Myc,Ndst2,Nkx3-1,Nprl3,Pcid2,Pfdn…	2010002N04Rik,AI848100,Aim2,Ankrd11,Arid3a,Bbc3,Cbfa2t3,Ccr1,Ccr2,Ccr3,Ccr5,Cd47,Chst3,Csf2rb,Dapp1,E2f2,Epor,Fasl,Gata1,Gfi1b,Ggta1,Id3,Il2rb,Itga2b,Klf13,Lgals9,Lgmn,Lyl1,Mafk,Mpo,Mtf1,Mxd1,Nfe2,Nos2,Pim2,Ptpn22,Ptprj,Rabgef1,Rfx5,Runx1,Runx3,Spna1,St3gal1,Suv420h2,Tfrc,Thoc5,Tmprss6,Tnfrsf13c,Treml1,Xrcc6,Zfpm1	AI848100,Abca1,Abcg1,Ace,Ada,Add1,Add2,Aff1,Aim2,Akt1,Alas2,Ankrd11,Apoa1,Apoa4,Apoc3,Apoe,Aqp1,Ar,Arhgap15,Arhgdib,Arhgef6,Arid4a,Arid4b,Arntl,Atm,Axl,B2m,B4galt1,B9d2,BC096441,Bak1,Batf3,Bax,Bcl10,Bcl2l11,Bik,Birc2,Birc3,Birc5,Bmpr1a,C1galt1,C3ar1,Casp3,Cbfa2t3,Cbl,Ccna2,Ccnd2,Ccr1,Ccr10,Ccr2,Ccr3,Ccr5,Ccr7,Cd19,Cd247,Cd24a,Cd274,Cd40lg,Cd44,Cd47,Cd59a,Cd59b,Cd72,Cd9,Cd97,Cdkn1b,Cds2,Cebpb,Cebp…	NA
Mouse Phenotype	abnormal hematopoietic system morphology/development	0		0					0	0	0	0		1190003J15Rik,AI848100,Abi1,Ace,Ada,Adam10,Adam17,Adamts13,Adipoq,Adrb2,Aff1,Agpat2,Aim2,Akt1,Akt3,Amhr2,Ank,Ankrd11,Ap3d1,Apc,Apoa1,Apoa4,Apoc3,Apoe,Appl1,Aprt,Arf6,Arhgdia,Arhgdib,Arhgef1,Arid1a,Arid3a,Arsa,Asb1,Atcay,Atp7b,Axl,B2m,B4galt1,B9d2,BC096441,Bag4,Bak1,Batf,Batf3,Bax,Bcl10,Bcl11a,Bcl3,Becn1,Bik,Bin3,Birc2,Birc3,Birc5,Braf,Brca2,Bst1,C4b,Cacna1a,Cap1,Capn10,Carm1,Casp3,Cbfa2t3,Cbs,Ccl…	NA	1190003J15Rik,2010002N04Rik,AI848100,Abca1,Abcc4,Abcg2,Abhd5,Abi1,Ace,Ada,Adam10,Add1,Add2,Adrb2,Aff1,Agpat2,Agtr1a,Alas2,Alox5,Amhr2,Ank,Ankrd11,Apcs,Aplf,Aprt,Aqp2,Arhgap15,Arhgef12,Arhgef6,Arid3a,Arid4b,Arntl,Asxl1,Atg5,Avpr2,Axl,B2m,B3gnt2,B4galt1,B9d2,BC096441,Bag4,Bank1,Bcl10,Bcl11a,Becn1,Bik,Birc2,Birc3,Blk,Bnip3l,Bst1,Btrc,C1galt1,C3,C4b,Cacna2d2,Cap1,Casp3,Cbfa2t3,Cbl,Ccnd2,Ccr1,Ccr10,Cc…	NA	NA	NA	NA	Agpat2,Akt1,B3gnt2,Bach2,Bcl11a,Ccl3,Ccl5,Cd276,Cd48,Cd69,Cd84,Cdkn2a,Cdkn2b,Cebpb,Chst3,Clec1b,Clec2d,Cnn2,Csf3r,Dock8,E2f2,Egln3,Elk4,Ern1,Ets1,Fads2,Fli1,Flt1,Flt3,Fyb,Gapdh,Gbx2,Ggta1,Gimap1,Gimap5,Gsx1,H2-D1,Hbb-b1,Hivep3,Hmga1,Hps5,Hsh2d,Icam2,Id3,Ier3,Ikzf1,Il21r,Il4ra,Irf2,Itgb3,Itpkb,Klf2,Klhl6,Klra17,Ksr1,Lgals9,Lta,Ltb,Ly9,Lyn,Mafk,Mdc1,Mdm4,Myh9,Nfkbia,Nos2,Notch1,Pdgfb,Pik3r1,Pla2g4a…	Abcg2,Add2,Adrb2,Aim2,Alas2,Ankrd11,Aprt,Arhgef12,B2m,B4galt1,Bcl10,Bcl11a,Bik,Birc2,Birc3,Cacna2d2,Carm1,Cbfa2t3,Cd24a,Cd47,Cd59a,Cd59b,Cerk,Cno,Comt,Crh,Csf2rb,Csf2rb2,Cul4a,Cx3cl1,Cx3cr1,Dapp1,Dnase2a,Dph1,Dusp1,Egr1,Eif2c2,Epb4.2,Fads2,Fbxo30,Fech,Fen1,Fntb,Foxo3,Gadd45a,Gata1,Gfi1b,Gnai2,Gypa,Hba-a2,Hba-x,Hbb-b1,Hfe,Hist1h1c,Hist1h1d,Hist1h1e,Hk1,Hps6,Hr,Hyal2,Icam1,Icam4,Ier3,Ifnar1,Ifnar2,…	2010002N04Rik,AI848100,Abcc4,Aim2,Ankrd11,Aprt,Arid3a,Bbc3,Bin3,Blm,Cbfa2t3,Ccr1,Ccr2,Ccr3,Ccr5,Cd47,Chst3,Creb3l1,Csf2rb,Csf2rb2,Dapp1,Dyrk3,E2f2,Epor,Fasl,Fzr1,Gata1,Gfi1b,Ggta1,Hlx,Id3,Ifngr2,Il2rb,Itga2b,Kiss1r,Klf13,Ksr1,Lbr,Lfng,Lgals9,Lgmn,Lyl1,Mafk,Mpo,Mtf1,Mxd1,Naglu,Nfe2,Nos2,Pim2,Ppp1r15a,Psap,Ptpn22,Ptprj,Rabgef1,Rap1a,Rfx5,Runx1,Runx3,Sap30bp,Sh2d2a,Spna1,St3gal1,Sucnr1,Suv420h2,Tac4…	AI848100,Abca1,Abcc4,Abcg1,Abcg2,Abhd5,Ace,Ada,Add1,Add2,Adrb2,Aff1,Agpat2,Aim2,Akt1,Alas2,Alox5,Ank,Ankrd11,Aplf,Apoa1,Apoa4,Apoc3,Apoe,Aprt,Aqp1,Ar,Arf6,Arhgap1,Arhgap15,Arhgdib,Arhgef12,Arhgef6,Arid4a,Arid4b,Arntl,Arsa,Asb1,Atm,Axl,B2m,B3gnt2,B4galt1,B9d2,BC096441,Bak1,Batf3,Bax,Bcl10,Bcl2l11,Becn1,Bik,Birc2,Birc3,Birc5,Blm,Bmpr1a,C1galt1,C3ar1,C5ar1,Cacna1a,Cacna2d2,Cap1,Capns1,Casp3,Cbfa2t3,…	NA
Mouse Phenotype	abnormal humoral immune response	0		0					4.21934e-179			0		Ada,Apoe,Arhgef1,Arid3a,Atf3,B2m,BC096441,Bak1,Batf,Bax,Bcl10,Bcl3,Birc3,Bst1,C4b,Ccl2,Ccr10,Ccr2,Ccr4,Ccr5,Ccr7,Cd19,Cd22,Cd28,Cd38,Cd69,Cd72,Cd74,Cd79a,Cd80,Cd81,Cd83,Cd84,Cebpb,Cfb,Cpb2,Cr1l,Cxcr2,Cxcr4,Dapp1,Dbnl,Def6,Diap1,Dll1,Dock2,Dock8,Dusp4,Ecm1,Fasl,Fcer1g,Fcer2a,Fcgr1,Fcgr2b,Fcgrt,Fcrla,Fcrlb,Fli1,Flt3l,Foxn1,Gabpb2,Gadd45b,Gcnt3,Ggta1,Gimap5,Gnai2,Gp49a,Gpr132,Grb2,H2-Ab1,H2afx,Hexb,…	NA	Ada,Apobec3,Arhgef6,Arid3a,Arntl,B2m,BC096441,Bank1,Bbs4,Bcl10,Birc3,Bst1,C3,C4b,Ccr10,Ccr2,Ccr5,Ccr7,Cd19,Cd38,Cd40lg,Cd55,Cd59a,Cd80,Cd81,Cebpb,Cfb,Chi3l1,Cr1l,Crlf2,Csf2rb,Csf2rb2,Ctla4,Cxcl9,Dapp1,Diap1,Ecm1,Esr2,F2rl1,Fasl,Fcer1a,Fcgr2b,Fcrla,Fcrlb,Fkbp11,Foxp3,Fyn,Gadd45a,Gata3,Gcnt3,Ggta1,Gpr183,Grb2,Hdac6,Hrh1,Icos,Id3,Ifnar1,Ifnar2,Ikzf1,Il21r,Il2rb,Il2rg,Il4,Il4ra,Inpp5d,Irf1,Irf2,Itgb2…	NA	NA	NA	NA	Adcy9,Bach2,Cd69,Cd84,Cebpb,Cpb2,Dock8,Dusp4,Fli1,Ggta1,Gimap5,Id3,Ikzf1,Il21r,Il4ra,Irf2,Itgb3,Itpkb,Klf2,Klra10,Lta,Ltb,Lyn,Nfkbia,Nos2,Notch1,Pik3r1,Plcg2,Rgs1,Runx3,Sema4b,Stat1,Tec,Tlr7,Tlr8,Tnf,Tom1l2,Zc3h12a	NA	NA	Ada,Adcy9,Apoe,Arhgef6,Arntl,Atf3,Atm,B2m,BC096441,Bak1,Bax,Bcl10,Bcl2l11,Birc3,Blm,C3ar1,C5ar1,Cabin1,Ccr10,Ccr2,Ccr5,Ccr7,Cd19,Cd40lg,Cd55,Cd59a,Cd72,Cebpb,Cpb2,Csf2rb,Csf2rb2,Ctse,Ctss,Dapp1,Def6,Diap1,Dok1,Ecm1,Esr2,Fasl,Fcgr1,Fcgr2b,Fcrla,Fcrlb,Fli1,Flt3l,Foxn1,Gadd45a,Gadd45b,Gcnt3,Ggta1,Gnai2,Gpr183,Grb2,H2-Ab1,H2afx,Hdac6,Hr,Hrh1,Id3,Ifnar1,Ifnar2,Igll1,Ikzf1,Ikzf3,Il10ra,Il21r,Il2rb,Il4,…	NA
Mouse Phenotype	abnormal hypersensitivity reaction	0		0					3.67419e-72					Adora2b,Apoe,B4galt1,Ccl2,Ccl3,Ccl5,Ccr1,Ccr2,Ccr5,Ccr7,Cd207,Cd28,Cd44,Cd74,Cd81,Cd83,Cebpb,Cysltr1,Ecm1,Eef1a2,F11r,Fbn1,Fcer1g,Fcer2a,Fcgr1,Fcgr2b,Fcgr3,Fut4,Fut7,Gm885,Gna11,Gna13,Gnaq,Gp49a,Icam1,Il21r,Il4ra,Laptm5,Lilrb4,Lta4h,Mmp9,Orai1,Pip5k1b,Pla2g4a,Ppia,Ptafr,Ptger1,Pycard,Relb,Rgs13,Rhoh,Sele,Sell,Selp,Tax1bp1,Tbxa2r,Tnf,Tyrobp,Vamp8	NA	Alox5,Anxa5,B4galt1,Ccr1,Ccr2,Ccr5,Ccr7,Ccrl2,Cd44,Cd81,Cebpb,Csf2rb,Csf2rb2,Dusp1,Ecm1,F2rl1,Fbn1,Fcer1a,Fcgr2b,Fcgr3,Foxp3,Fyn,Gab2,Icam1,Ifngr2,Il1a,Il1b,Il21r,Il4ra,Laptm5,Lta4h,Mmp3,Ms4a2,Pgf,Pip5k1b,Ptafr,Ptger1,Rgs13,Rhoh,Stim1,Tax1bp1	NA	NA	NA	NA	Alox5ap,Ccl3,Ccl5,Cebpb,F11r,Gnaq,Il12a,Il21r,Il4ra,Ltc4s,Ncf1,Pla2g4a,Rgs13,Tnf,Vamp8	NA	NA	NA	NA
Mouse Phenotype	abnormal immature B cell morphology	0		0								0		Adam10,Aff1,Arhgdia,Arhgdib,Arid3a,Bak1,Bax,Bik,Birc3,Bst1,Cbfa2t3,Cd19,Cd22,Cd24a,Cd69,Cd72,Cd74,Cd79a,Chuk,Dck,Def6,Erg,Ewsr1,Fli1,Flt3,Flt3l,Foxn1,Fshr,Gimap1,Grb2,Hdac1,Igll1,Ikzf1,Inpp5d,Irf8,Kit,Lta,Lyn,Mcl1,Mll1,Mll5,Msi2,Myb,Nfkbia,Nfkbie,Notch1,Notch2,Pax5,Pbx1,Pfdn1,Pik3ap1,Pik3r1,Pim1,Pnp,Pou2af1,Ppp2r3c,Prf1,Prkcd,Ptch1,Rac2,Relb,Rnf8,Sfpi1,Sgpl1,Socs1,Sox4,Ssbp2,Sykb,Tcf12,Tcf3,Tec,T…	NA	Adam10,Aff1,Arid3a,Arntl,Asxl1,Bik,Birc3,Blk,Bst1,Cbfa2t3,Cd19,Cd24a,Dck,Dkc1,Dll4,Erg,Esr2,Ewsr1,Flt3,Fyn,Grb2,Ikzf1,Il2rg,Il4,Inpp5d,Kit,Mcl1,Mdm2,Mll5,Msi2,Myb,Nbn,Nfkb1,Notch1,Pfdn1,Pik3r1,Pim1,Pim2,Ppp2r3c,Rac2,Rag1,Rnf8,Sfpi1,Siglecg,Tec,Tet2,Tnfrsf13c,Vav1,Xrcc6	NA	NA	NA	NA	NA	NA	NA	Aff1,Ar,Arhgdib,Arntl,Atm,Bak1,Bax,Bcl2l11,Bik,Birc3,Cbfa2t3,Cd19,Cd24a,Cd72,Def6,Dicer1,Dkc1,Dll4,Erg,Esr2,Ewsr1,Fli1,Flt3,Flt3l,Foxn1,Grb2,Hdac1,Htra2,Igll1,Ikzf1,Ikzf3,Il4,Il7r,Inpp5d,Irf8,Mcl1,Msi2,Myb,Nfkb1,Nkx3-1,Notch1,Pbx1,Pfdn1,Pik3ap1,Pik3r1,Pim1,Pim2,Plcg2,Ppp2r3c,Prkcd,Ptprj,Rac2,Relb,Rnf8,Sfpi1,Socs1,Spib,Ssbp2,Tcf3,Tec,Tet2,Tnfrsf13c,Traf2,Twsg1,Vav1,Vav2,Vav3,Vpreb1,Xrcc6	NA
Mouse Phenotype	abnormal immune cell physiology	0	0	0					0		2.91465e-226	0		AI848100,Abcc1,Abi1,Ada,Adam17,Adipoq,Adora2b,Adrb2,Aim2,Akt1,Akt3,Aoc3,Apoe,Appl1,Arhgdia,Arhgdib,Arhgef1,Arid3a,Arrb2,Atf3,Axl,B2m,B4galt1,BC096441,Bag4,Bak1,Batf,Batf3,Bax,Bcl10,Bcl3,Bik,Birc2,Birc3,Birc5,Bloc1s3,Braf,Brca2,Bst1,Camk2g,Card9,Casp3,Casp9,Ccl1,Ccl11,Ccl2,Ccl5,Ccr1,Ccr10,Ccr2,Ccr3,Ccr4,Ccr5,Ccr7,Cd19,Cd22,Cd244,Cd247,Cd28,Cd38,Cd3e,Cd3g,Cd44,Cd48,Cd68,Cd69,Cd72,Cd74,Cd79a,Cd80,Cd…	Abcc1,Abcg1,Abi1,Akt1,Apobec3,Arhgdia,Atf3,Batf3,Bbc3,Bcl6b,Birc2,Birc3,Birc5,Card9,Cd244,Cd47,Cd48,Cd84,Chrm1,Cnn2,Csf1,Csf3,Ctsl,Espn,Ets1,Fcgr1,Fgr,Fli1,Fos,Gm885,Gna12,Grk6,H2-D1,H2afx,Hps1,Hsh2d,Hsp90b1,Igj,Ikzf1,Inpp5d,Klf2,Lta,Ltb,Ly9,Map3k3,Me2,Mll5,Mmp28,Mt1,Mt2,Myo9b,Nfe2l2,Nlrp6,Notch2,Orai1,P2ry6,Pecam1,Pfn1,Pik3c2a,Ppia,Ppp2r3c,Prkcq,Psen1,Pstpip2,Ptprj,Rasa4,Rfk,Rhoh,Rpl22,Runx1,Rxr…	AI848100,Abca1,Abcc1,Abi1,Ada,Adora3,Adrb2,Alox5,Aoc3,Aplf,Apobec3,Arhgap15,Arhgef12,Arhgef6,Arid3a,Arntl,Axl,B2m,B3gnt2,B4galt1,BC096441,Bag4,Bank1,Bbs4,Bcl10,Bik,Birc2,Birc3,Blk,Bst1,C3,Camk2d,Camk2g,Card9,Casp3,Cbl,Ccr1,Ccr10,Ccr2,Ccr3,Ccr5,Ccr7,Ccrl2,Cd19,Cd200r1,Cd247,Cd274,Cd276,Cd38,Cd40lg,Cd44,Cd47,Cd68,Cd80,Cd81,Cdkn1b,Cebpb,Chi3l1,Chrm1,Clcn3,Clec4e,Cnpy3,Cnr2,Cops6,Crlf2,Cry2,Csf2rb,Cs…	NA	NA	NA	NA	Adcy9,Akt1,Alox5ap,B3gnt2,Bach2,Ccl5,Cd244,Cd276,Cd48,Cd69,Cd84,Cebpb,Clec7a,Clec9a,Cnn2,Cnr2,Csf3r,Ctsc,Dusp2,Dusp4,E2f2,Ets1,F11r,Fads2,Fli1,Flot1,Flt1,Flt3,Fyb,Ggta1,Gimap1,Gimap4,Gimap5,H2-D1,Hsh2d,Icam2,Id3,Ier3,Ikzf1,Il12a,Il21r,Il4ra,Il6ra,Irf2,Itgb3,Itpkb,Klf2,Klra10,Klra17,Klre1,Ksr1,Lta,Ltb,Ly9,Lyn,Mbtps1,Mdc1,Mdm4,Mrc1,Myh9,Ncf1,Nfkbia,Nos2,Notch1,Panx1,Pik3r1,Pla2g4a,Plcg2,Prex1,Prkcq…	NA	AI848100,Adora3,Aim2,Arid3a,Bbc3,Blm,Ccr1,Ccr2,Ccr3,Ccr5,Cd47,Cnr2,Csf2rb,Csf2rb2,Dapp1,E2f2,Fasl,Ggta1,Hdac6,Id3,Ifngr2,Il2rb,Klf13,Ksr1,Lgmn,Mcph1,Mpo,Mxd1,Ncf4,Nos2,Padi4,Pdlim2,Pim2,Psap,Ptpn22,Ptprj,Rabgef1,Rap1a,Rfk,Rfx5,Runx1,Runx3,Sema4b,Sh2d2a,Spna1,Sucnr1,Suv420h2,Tnfrsf13c,Tspan32,Xcr1,Xrcc6	AI848100,Abca1,Abcc1,Abcg1,Acp5,Ada,Adcy9,Adora3,Adrb2,Aim2,Akt1,Alox5,Aoc3,Aplf,Apoe,Arhgap15,Arhgdib,Arhgef12,Arhgef6,Arntl,Atf3,Atm,Axl,B2m,B3gnt2,B4galt1,BC096441,Bak1,Batf3,Bax,Bcl10,Bcl2l11,Bik,Birc2,Birc3,Birc5,Blm,Bmpr1a,C3ar1,C5ar1,Cabin1,Camk2g,Casp1,Casp3,Casp7,Casp9,Cbl,Ccr1,Ccr10,Ccr2,Ccr3,Ccr5,Ccr7,Ccrl2,Cd19,Cd200r1,Cd226,Cd247,Cd274,Cd276,Cd40lg,Cd44,Cd47,Cd68,Cd72,Cd9,Cdkn1b,Cebp…	NA
Mouse Phenotype	abnormal immune serum protein physiology	0		0					0		3.05339e-190	0		2610301G19Rik,Abi1,Ace,Ada,Adam17,Adora2b,Aim2,Apoe,Arhgdia,Arhgdib,Arhgef1,Arid3a,Arrb2,Atf3,Atg9a,Axl,B2m,BC096441,Bag4,Bak1,Batf,Bax,Bcl10,Bcl3,Birc3,Bst1,Card9,Cbs,Ccl2,Ccl3,Ccl5,Ccnd1,Ccr1,Ccr10,Ccr2,Ccr3,Ccr4,Ccr5,Ccr7,Cd19,Cd22,Cd247,Cd28,Cd300lf,Cd44,Cd69,Cd72,Cd74,Cd79a,Cd80,Cd81,Cd83,Cd84,Cebpb,Clec4e,Clec4n,Clec7a,Clic4,Cnpy3,Comt,Cpb2,Creb1,Cry2,Csf1,Csf1r,Ctsc,Cxcl16,Cxcl5,Cxcr2,Cxcr…	NA	Abca1,Abi1,Ace,Ada,Adora3,Anxa5,Apobec3,Arhgef6,Arid3a,Arntl,Atg9a,Axl,B2m,B3gnt2,BC096441,Bag4,Bank1,Bbs4,Bcl10,Birc3,Bst1,C3,Card9,Cbl,Ccr1,Ccr10,Ccr2,Ccr3,Ccr5,Ccr7,Ccrl2,Cd19,Cd200r1,Cd247,Cd274,Cd276,Cd300lf,Cd40lg,Cd44,Cd47,Cd80,Cd81,Cebpb,Chi3l1,Clec4e,Clec4n,Clic4,Cnpy3,Comt,Creb1,Creb3l3,Crlf2,Cry2,Csf2rb,Csf2rb2,Ctla4,Ctsc,Cxcl9,Dapp1,Drosha,Dtx1,Dusp1,E2f1,Ebi3,Ecm1,Egr1,Esr2,F2r,F2rl1…	NA	NA	NA	NA	Adcy9,Adora2a,B3gnt2,Bach2,Ccl3,Ccl5,Cd276,Cd69,Cd84,Cebpb,Clec7a,Clic4,Cpb2,Ctsc,Dusp2,Dusp4,F2r,Fli1,Flt3,Fyb,Ggta1,Gimap5,Hivep3,Hsh2d,Id3,Ier3,Ikzf1,Il12a,Il21r,Il4ra,Il6ra,Irf2,Itgb3,Itpkb,Klf2,Klra10,Klra17,Ksr1,Litaf,Lta,Ltb,Ly9,Lyn,Mbtps1,Nfkbia,Nos2,Notch1,Pla2g4a,Plcg2,Prkcq,Rgs1,Runx3,Sema4b,Slamf1,Slamf6,Socs1,Sqstm1,Stat1,Stat4,Sucnr1,Tec,Tlr7,Tlr8,Tnf,Ubash3a,Zc3h12a	NA	2610301G19Rik,Adora3,Aim2,Arid3a,Blm,Ccr1,Ccr2,Ccr3,Ccr5,Cd47,Clic4,Csf2rb,Csf2rb2,Dapp1,Darc,Fasl,Gata1,Ggta1,Hdac6,Id3,Il2rb,Ksr1,Lgmn,Nos2,Pdlim2,Pim2,Ptpn22,Ptprj,Rabgef1,Rap1a,Rfx5,Runx1,Runx3,Sema4b,Sh2d2a,Spna1,Sucnr1,Tnfrsf13c,Trafd1,Trem2,Treml1,Xrcc6,Zfpm1	Abca1,Abcg1,Ace,Ada,Adcy9,Adora3,Aim2,Apoe,Arhgdib,Arhgef6,Arntl,Atf3,Atg9a,Atm,Axl,B2m,B3gnt2,BC096441,Bak1,Bax,Bcl10,Bcl2l11,Birc3,Blm,C3ar1,Cabin1,Casp1,Casp12,Casp4,Cbl,Cbs,Ccr1,Ccr10,Ccr2,Ccr3,Ccr5,Ccr7,Ccrl2,Cd19,Cd200r1,Cd226,Cd247,Cd274,Cd276,Cd40lg,Cd44,Cd47,Cd72,Cebpb,Clec4e,Clec4n,Clic4,Cnpy3,Comt,Cpb2,Creb3l3,Cry2,Csf1,Csf2rb,Csf2rb2,Ctse,Ctss,Cxcl5,Dapp1,Darc,Def6,Dok1,Drosha,Dtx1,Eb…	NA
Mouse Phenotype	abnormal immune system cell morphology	0		0					0		4.33789e-256	0		AI848100,Abi1,Ace,Ada,Adam10,Adam17,Adipoq,Adrb2,Aff1,Aim2,Akt1,Akt3,Amhr2,Ank,Ankrd11,Apc,Apoa1,Apoa4,Apoc3,Apoe,Appl1,Arhgdia,Arhgdib,Arhgef1,Arid3a,Arsa,Atp7b,Axl,B2m,B4galt1,B9d2,BC096441,Bak1,Batf,Batf3,Bax,Bcl10,Bcl11a,Bcl3,Bik,Birc2,Birc3,Birc5,Braf,Brca2,Bst1,C4b,Carm1,Casp3,Cbfa2t3,Ccl11,Ccl2,Ccl25,Ccl3,Ccl5,Ccl7,Ccm2,Ccnd1,Ccnd2,Ccr1,Ccr10,Ccr2,Ccr3,Ccr4,Ccr5,Ccr7,Cd19,Cd207,Cd22,Cd247,…	NA	2010002N04Rik,AI848100,Abhd5,Abi1,Ace,Ada,Adam10,Adrb2,Aff1,Amhr2,Ank,Ankrd11,Aplf,Arhgap15,Arhgef12,Arhgef6,Arid3a,Arid4b,Arntl,Asxl1,Axl,B2m,B3gnt2,B4galt1,B9d2,BC096441,Bank1,Bcl10,Bcl11a,Bik,Birc2,Birc3,Blk,Bnip3l,Bst1,Btrc,C3,C4b,Casp3,Cbfa2t3,Cbl,Ccnd2,Ccr1,Ccr10,Ccr2,Ccr3,Ccr5,Ccr7,Cd19,Cd247,Cd24a,Cd274,Cd276,Cd40lg,Cd44,Cd47,Cd80,Cd81,Cd97,Cdkn1b,Cebpb,Cerk,Chi3l1,Chst3,Clec4e,Clec4n,Col…	NA	NA	NA	NA	Akt1,B3gnt2,Bach2,Bcl11a,Ccl3,Ccl5,Cd276,Cd48,Cd69,Cd84,Cdkn2a,Cdkn2b,Cebpb,Chst3,Clec1b,Clec2d,Cnn2,Csf3r,Dock8,E2f2,Elk4,Ern1,Ets1,Fli1,Flt3,Fyb,Ggta1,Gimap1,Gimap5,Gsx1,H2-D1,Hivep3,Hmga1,Hsh2d,Id3,Ier3,Ikzf1,Il21r,Il4ra,Irf2,Itgb3,Itpkb,Klf2,Klhl6,Klra17,Ksr1,Lgals9,Lta,Ltb,Ly9,Lyn,Mdc1,Mdm4,Myh9,Nfkbia,Nos2,Notch1,Pdgfb,Pik3r1,Pla2g4a,Plcg2,Prex1,Prkcq,Psap,Rgs1,Runx3,Serpinb2,Sin3b,Slamf1,S…	NA	2010002N04Rik,AI848100,Aim2,Ankrd11,Arid3a,Bbc3,Cbfa2t3,Ccr1,Ccr2,Ccr3,Ccr5,Cd47,Chst3,Csf2rb,Csf2rb2,Dapp1,E2f2,Fasl,Gata1,Ggta1,Id3,Ifngr2,Il2rb,Klf13,Ksr1,Lbr,Lgals9,Lgmn,Lyl1,Mpo,Mtf1,Mxd1,Naglu,Nfe2,Nos2,Pim2,Psap,Ptpn22,Ptprj,Rabgef1,Rap1a,Rfx5,Runx1,Runx3,Sh2d2a,Spna1,St3gal1,Sucnr1,Suv420h2,Tac4,Thoc5,Tmprss6,Tnfrsf13c,Tspan32,Xrcc6,Zfpm1	AI848100,Abcg1,Abhd5,Ace,Ada,Adrb2,Aff1,Aim2,Akt1,Ank,Ankrd11,Aplf,Apoa1,Apoa4,Apoc3,Apoe,Ar,Arhgap15,Arhgdib,Arhgef12,Arhgef6,Arid4a,Arid4b,Arntl,Arsa,Atm,Axl,B2m,B3gnt2,B4galt1,B9d2,BC096441,Bak1,Batf3,Bax,Bcl10,Bcl2l11,Bik,Birc2,Birc3,Birc5,Bmpr1a,C3ar1,Casp3,Cbfa2t3,Cbl,Ccna2,Ccnd2,Ccne1,Ccr1,Ccr10,Ccr2,Ccr3,Ccr5,Ccr7,Cd19,Cd226,Cd247,Cd24a,Cd274,Cd276,Cd40lg,Cd44,Cd47,Cd72,Cd9,Cd97,Cdkn1b,Cd…	NA
Mouse Phenotype	abnormal immune system morphology	0		0					0	0	4.23666e-307	0		AI848100,Abi1,Ace,Ada,Adam10,Adam17,Adipoq,Adrb2,Aff1,Agpat2,Aim2,Akt1,Akt3,Amhr2,Angptl4,Ank,Ankrd11,Apc,Apoa1,Apoa4,Apoc3,Apoe,Appl1,Arhgdia,Arhgdib,Arhgef1,Arid3a,Arsa,Asb1,Atcay,Atp7b,Axl,B2m,B4galt1,B9d2,BC096441,Bag4,Bak1,Batf,Batf3,Bax,Bcl10,Bcl11a,Bcl3,Becn1,Bik,Bin3,Birc2,Birc3,Birc5,Braf,Brca2,Bst1,C4b,Cacna1a,Calcrl,Cap1,Capn10,Carm1,Casp3,Cbfa2t3,Ccl11,Ccl2,Ccl25,Ccl3,Ccl5,Ccl7,Ccm2,C…	NA	2010002N04Rik,AI848100,Abca1,Abcc4,Abhd5,Abi1,Ace,Ada,Adam10,Add2,Adrb2,Aff1,Agpat2,Alox5,Amhr2,Ank,Ankrd11,Apcs,Aplf,Aqp3,Arhgap15,Arhgef12,Arhgef6,Arid3a,Arid4b,Arntl,Asxl1,Atg5,Axl,B2m,B3gnt2,B4galt1,B9d2,BC096441,Bag4,Bank1,Bcl10,Bcl11a,Becn1,Bik,Birc2,Birc3,Blk,Bnip3l,Bst1,Btrc,C3,C4b,Cacna2d2,Calcrl,Cap1,Casp3,Cbfa2t3,Cbl,Ccnd2,Ccr1,Ccr10,Ccr2,Ccr3,Ccr5,Ccr7,Ccrl2,Cd19,Cd247,Cd24a,Cd274,Cd2…	NA	NA	NA	NA	Agpat2,Akt1,B3gnt2,Bach2,Bcl11a,Ccl3,Ccl5,Cd276,Cd48,Cd69,Cd84,Cdkn2a,Cdkn2b,Cebpb,Chst3,Clec1b,Clec2d,Cnn2,Csf3r,Dock8,E2f2,Egln3,Elk4,Ern1,Ets1,F2r,Fads2,Fli1,Flt3,Fyb,Gbx2,Ggta1,Gimap1,Gimap5,Gsx1,H2-D1,Hbb-b1,Hivep3,Hmga1,Hsh2d,Id3,Ier3,Ikzf1,Il21r,Il4ra,Irf2,Itgb3,Itpkb,Klf2,Klhl6,Klra17,Ksr1,Lgals9,Lta,Ltb,Ly9,Lyn,Mafk,Mdc1,Mdm4,Myh9,Nfkbia,Nos2,Notch1,Pdgfb,Pik3r1,Pla2g4a,Plcg2,Prex1,Prkcq…	Add2,Adrb2,Aim2,Ankrd11,Arhgef12,B2m,B4galt1,Bcl10,Bcl11a,Bik,Birc2,Birc3,Cacna2d2,Carm1,Cbfa2t3,Cd24a,Cd47,Cerk,Comt,Crh,Csf2rb,Csf2rb2,Cul4a,Cx3cl1,Cx3cr1,Dapp1,Dnase2a,Dusp1,Egr1,Eif2c2,Epb4.2,Fads2,Fbxo30,Fech,Fen1,Fntb,Foxo3,Gadd45a,Gata1,Gfi1b,Gnai2,Hbb-b1,Hfe,Hist1h1c,Hist1h1d,Hist1h1e,Hk1,Hr,Hyal2,Icam1,Ier3,Ifnar1,Ifnar2,Igf1r,Ikzf1,Il10rb,Il21r,Il2rb,Il4ra,Itga4,Jak1,Kcnn4,Kdr,Klf1,Klf1…	2010002N04Rik,AI848100,Abcc4,Aim2,Angptl4,Ankrd11,Arid3a,Bbc3,Bin3,Cbfa2t3,Ccr1,Ccr2,Ccr3,Ccr5,Cd47,Chst3,Csf2rb,Csf2rb2,Dapp1,E2f2,Epor,Fasl,Gata1,Gfi1b,Ggta1,Id3,Ifngr2,Il2rb,Itga2b,Kiss1r,Klf13,Ksr1,Lbr,Lgals9,Lgmn,Lyl1,Mafk,Mpo,Msmb,Mtf1,Mxd1,Naglu,Nfe2,Nos2,Pim2,Ppp1r15a,Psap,Ptpn22,Ptprj,Rabgef1,Rap1a,Rfx5,Runx1,Runx3,Sh2d2a,Spna1,St3gal1,Sucnr1,Suv420h2,Tac4,Tfrc,Thoc5,Tmprss6,Tnfrsf13c,Ts…	AI848100,Abca1,Abcc4,Abcg1,Abhd5,Ace,Ada,Add2,Adm,Adrb2,Aff1,Agpat2,Aim2,Akt1,Alox5,Angptl4,Ank,Ankrd11,Aplf,Apoa1,Apoa4,Apoc3,Apoe,Aqp3,Ar,Arhgap1,Arhgap15,Arhgdib,Arhgef12,Arhgef6,Arid4a,Arid4b,Arntl,Arsa,Asb1,Atm,Axl,B2m,B3gnt2,B4galt1,B9d2,BC096441,Bak1,Batf3,Bax,Bcl10,Bcl2l11,Becn1,Bik,Birc2,Birc3,Birc5,Bmpr1a,C3ar1,C5ar1,Cacna1a,Cacna2d2,Calcrl,Cap1,Casp3,Cbfa2t3,Cbl,Ccna2,Ccnd2,Ccne1,Ccr1,…	NA
Mouse Phenotype	abnormal immune system organ morphology	0		0					2.68707e-265	0		0		Ada,Adam10,Adam17,Aff1,Agpat2,Akt1,Akt3,Angptl4,Apc,Apoe,Arhgdia,Arhgdib,Arhgef1,Arid3a,Asb1,Atcay,Axl,B2m,B4galt1,BC096441,Bag4,Bak1,Bax,Bcl10,Bcl11a,Bcl3,Becn1,Bik,Bin3,Birc2,Birc3,Birc5,Braf,Brca2,C4b,Cacna1a,Calcrl,Cap1,Capn10,Carm1,Casp3,Cbfa2t3,Ccl25,Ccnd1,Ccr2,Ccr7,Cd19,Cd22,Cd247,Cd24a,Cd28,Cd34,Cd3d,Cd3e,Cd3g,Cd5l,Cd72,Cd74,Cd79a,Cd80,Cd84,Cdkn1b,Cdkn2a,Cdkn2b,Cebpa,Cebpb,Cebpe,Cfc1,Cfla…	NA	Abca1,Abcc4,Ada,Adam10,Add2,Aff1,Agpat2,Alox5,Apcs,Aqp3,Arid3a,Arid4b,Arntl,Asxl1,Atg5,Axl,B2m,B4galt1,BC096441,Bag4,Bank1,Bcl10,Bcl11a,Becn1,Bik,Birc2,Birc3,Blk,Bnip3l,C3,C4b,Cacna2d2,Calcrl,Cap1,Casp3,Cbfa2t3,Cbl,Ccr2,Ccr7,Ccrl2,Cd19,Cd247,Cd24a,Cd40lg,Cd47,Cd80,Cdkn1b,Cebpb,Cfc1,Cideb,Cited2,Col10a1,Cpa3,Cr1l,Crlf2,Csf2rb,Csf2rb2,Ctcf,Ctla4,Ctnnb1,Ctsd,Ctsg,Dad1,Dck,Dffb,Diap1,Dkc1,Dll4,Dnase1…	NA	NA	NA	NA	Agpat2,Akt1,Bach2,Bcl11a,Cd84,Cdkn2a,Cdkn2b,Cebpb,Dock8,E2f2,Egln3,Elk4,Ets1,F2r,Fads2,Fli1,Flt3,Fyb,Gbx2,Gimap1,Gimap5,Hbb-b1,Hmga1,Hsh2d,Ikzf1,Il21r,Irf2,Itgb3,Itpkb,Klhl6,Lta,Ltb,Lyn,Mafk,Mdc1,Mdm4,Myh9,Nfkbia,Nos2,Notch1,Plcg2,Prkcq,Psap,Rgs1,Runx3,Slc2a10,Slc46a2,Socs1,Sp3,Stat1,Tec,Tlr7,Tlr8,Tnf,Tom1l2,Txnip,Ubash3a,Zc3h12a,Zfp36l1,Zfp36l2	Add2,B2m,B4galt1,Bcl10,Bcl11a,Bik,Birc2,Birc3,Cacna2d2,Carm1,Cbfa2t3,Cd24a,Cd47,Crh,Csf2rb,Csf2rb2,Cul4a,Dnase2a,Egr1,Eif2c2,Epb4.2,Fads2,Fbxo30,Fech,Fen1,Fntb,Foxo3,Gadd45a,Gata1,Gfi1b,Gnai2,Hbb-b1,Hfe,Hist1h1c,Hist1h1d,Hist1h1e,Hk1,Hr,Hyal2,Icam1,Ifnar1,Ikzf1,Il10rb,Il21r,Il2rb,Itga4,Jak1,Kcnn4,Klf1,Klf13,Lass1,Lat2,Lyve1,Mafk,Mdc1,Mdm2,Msmb,Mxi1,Myc,Nhej1,Nkx3-1,Nprl3,Pcid2,Pfdn1,Phc1,Pklr,Pnp…	NA	Abca1,Abcc4,Ada,Add2,Adm,Aff1,Agpat2,Akt1,Alox5,Angptl4,Apoe,Aqp3,Ar,Arhgap1,Arhgdib,Arid4a,Arid4b,Arntl,Asb1,Atm,Axl,B2m,B4galt1,BC096441,Bak1,Bax,Bcl10,Bcl2l11,Becn1,Bik,Birc2,Birc3,Birc5,C5ar1,Cacna1a,Cacna2d2,Calcrl,Cap1,Casp3,Cbfa2t3,Cbl,Ccne1,Ccr2,Ccr7,Ccrl2,Cd19,Cd247,Cd24a,Cd40lg,Cd47,Cd72,Cdc73,Cdkn1b,Cebpb,Cebpe,Cflar,Chd2,Chd4,Cideb,Cited2,Cks1b,Cpa3,Csf1,Csf2rb,Csf2rb2,Csk,Ctcf,Ctsd,C…	NA
Mouse Phenotype	abnormal immune system physiology	0	0	0					0		5.28012e-304	0		2610301G19Rik,AI848100,Abcb4,Abcc1,Abi1,Acan,Ace,Ada,Adam17,Adamts13,Adh5,Adipoq,Adora2b,Adprh,Adrb2,Agt,Agtr1b,Aim2,Akt1,Akt3,Als2,Ank,Aoc3,Apc,Apoa4,Apoe,Appl1,Aprt,Arhgdia,Arhgdib,Arhgef1,Arid3a,Arl3,Arrb2,Arsa,Atf3,Atg9a,Atp7a,Axl,B2m,B4galt1,B9d2,BC096441,Bag4,Bak1,Batf,Batf3,Bax,Bcl10,Bcl3,Bik,Bin3,Birc2,Birc3,Birc5,Bloc1s3,Bmp7,Bmp8b,Braf,Brca2,Bsg,Bst1,C4b,Camk2g,Card9,Casp3,Casp9,Cbs,Ccb…	Abcc1,Abcg1,Abi1,Ace,Agt,Akt1,Apobec3,Aqp9,Arhgdia,Atf3,Batf3,Bbc3,Bcl6b,Birc2,Birc3,Birc5,Bmp7,Card9,Cby1,Cd244,Cd47,Cd48,Cd84,Cd97,Cdsn,Chrm1,Cnn2,Creb3l3,Crip2,Csf1,Csf3,Ctsl,Dnase1,Espn,Ets1,Fbxo11,Fcgr1,Fgr,Fli1,Fos,Gast,Gm885,Gna12,Grk6,H2-D1,H2afx,Hmox1,Hps1,Hsh2d,Hsp90b1,Htr3a,Ifna6,Igj,Ikzf1,Il1f5,Il1rap,Il28ra,Inpp5d,Itga3,Klf2,Klf5,Lta,Ltb,Ly9,Map3k3,Masp2,Me2,Mll5,Mmp28,Mt1,Mt2,Myo9b,…	AI848100,Abca1,Abcc1,Abcc4,Abi1,Ace,Ada,Adamts5,Adora3,Adprh,Adrb2,Agtr1a,Agtr1b,Aimp1,Alox5,Als2,Ank,Anxa5,Aoc3,Apcs,Aplf,Apobec3,Aprt,Aqp3,Aqp9,Arhgap15,Arhgef12,Arhgef6,Arid3a,Arntl,Atg5,Atg9a,Atp7a,Axl,B2m,B3gnt2,B4galt1,B9d2,BC096441,Bag4,Bank1,Bbs4,Bcl10,Bik,Birc2,Birc3,Blk,Bmp5,Bmx,Bst1,C1galt1,C3,C4b,Cacna2d2,Camk2d,Camk2g,Card9,Casp3,Cbfa2t2,Cbl,Ccr1,Ccr10,Ccr2,Ccr3,Ccr5,Ccr7,Ccrl2,Cd19,…	NA	NA	NA	NA	Adcy9,Adora2a,Agt,Akt1,Alox5ap,B3gnt2,Bach2,Bmp7,Ccl3,Ccl5,Cd244,Cd276,Cd48,Cd69,Cd84,Cdkn2a,Cdsn,Cebpb,Clec1b,Clec7a,Clec9a,Clic4,Cnn2,Cnr2,Cpb2,Csf3r,Ctsc,Dock8,Dusp2,Dusp4,E2f2,Epha1,Ets1,F11r,F2r,Fads2,Fli1,Flot1,Flt1,Flt3,Fyb,Ggta1,Gimap1,Gimap4,Gimap5,Gnaq,Golm1,H2-D1,Hivep3,Hps5,Hsh2d,Icam2,Id3,Ier3,Ikzf1,Il12a,Il21r,Il4ra,Il6ra,Irf2,Itgb3,Itpkb,Klf2,Klhl6,Klra10,Klra17,Klre1,Ksr1,Lgals9,L…	NA	2610301G19Rik,AI848100,Abcc4,Adora3,Aim2,Aprt,Arid3a,Bbc3,Bin3,Blm,Bmp7,Ccr1,Ccr2,Ccr3,Ccr5,Cd47,Clic4,Cnr2,Csf2rb,Csf2rb2,Dapp1,Darc,E2f2,Fasl,Gata1,Ggta1,Hdac6,Id3,Ifngr2,Iigp1,Il2rb,Itga3,Itgb4,Klf13,Ksr1,Lgals9,Lgmn,Mcph1,Mpo,Mxd1,Naglu,Ncf4,Nfe2,Nos2,Padi4,Pdlim2,Pim2,Psap,Ptpn22,Ptprj,Rabgef1,Rap1a,Rfk,Rfx5,Runx1,Runx3,Sema4b,Sh2d2a,Spna1,Sucnr1,Suv420h2,Tnfrsf13c,Trafd1,Trem2,Treml1,Tspan3…	AI848100,Abca1,Abcb4,Abcc1,Abcc4,Abcg1,Ace,Acp5,Ada,Adamts5,Adcy9,Adm,Adora3,Adrb2,Agtr1b,Ahi1,Aim2,Akt1,Alox5,Als2,Ank,Aoc3,Aplf,Apoa4,Apoe,Aprt,Aqp3,Aqp9,Ar,Arhgap15,Arhgdib,Arhgef12,Arhgef6,Arntl,Arsa,Atf3,Atg9a,Atm,Atp7a,Axl,B2m,B3gnt2,B4galt1,B9d2,BC096441,Bahd1,Bak1,Batf3,Bax,Bcl10,Bcl2l11,Bid,Bik,Birc2,Birc3,Birc5,Blm,Bmpr1a,Bmx,Bsg,C1galt1,C3ar1,C5ar1,Cabin1,Cacna2d2,Camk2g,Casp1,Casp12,C…	NA
Mouse Phenotype	abnormal immune tolerance	0		0					2.59378e-121			0		Acan,Apoe,Arsa,Axl,B2m,B9d2,BC096441,Bak1,Batf,Bax,C4b,Ccl2,Ccr2,Ccr7,Ccr8,Cd19,Cd22,Cd28,Cd300lf,Cd38,Cd44,Cd69,Cd74,Cd79a,Cd80,Cdk4,Cfb,Chuk,Clec5a,Col17a1,Cry2,Cx3cr1,Cxcr2,Cxcr4,Def6,Dnase1,Dntt,Dtx1,Dusp2,E2f2,Ecm1,Elf1,Fadd,Fasl,Fbn1,Fcer1g,Fcgr1,Fcgr2b,Fcgr3,Fcrlb,Foxo1,Gadd45b,Gna13,Gpr132,H2-Ab1,H2-T23,Hc,Hcst,Hif1a,Icam1,Id3,Ifnar1,Ifngr1,Il10ra,Il12rb2,Il17f,Il21r,Il4ra,Il5ra,Il6,Il6st…	NA	Adamts5,Alox5,Apcs,Axl,B2m,B9d2,BC096441,Bmx,C3,C4b,Ccr2,Ccr7,Cd19,Cd274,Cd276,Cd300lf,Cd38,Cd40lg,Cd44,Cd55,Cd80,Cfb,Cry2,Ctla4,Dnase1,Dtx1,Dusp1,E2f1,E2f2,Ecm1,F2rl1,Fasl,Fbn1,Fcgr2b,Fcgr3,Fcrlb,Foxp3,Fyn,Gadd45a,Hc,Icam1,Icos,Id3,Ifnar1,Ifngr2,Il1a,Il1b,Il21r,Il2rb,Il4,Il4ra,Irf1,Itgav,Itgb2,Kit,Ksr1,Lat,Lat2,Lcp2,Lepr,Lgals1,Lgals9,Ltb4r1,Mapk14,Mbp,Mpo,Mpz,Ndst2,Nfkb1,Ngfr,Nos2,Nr3c1,Pdcd1lg…	NA	NA	NA	NA	Alox5ap,Cd276,Cd69,Dusp2,E2f2,Id3,Il12a,Il21r,Il4ra,Ksr1,Lgals9,Lta,Lyn,Ncf1,Nfkbia,Nos2,Pla2g4a,Plcg2,Prkcq,Socs1,Stat4,Tlr7,Tlr8,Tnf,Ubash3a,Zc3h12a	NA	NA	Adamts5,Alox5,Apoe,Arsa,Axl,B2m,B9d2,BC096441,Bak1,Bax,Bcl2l11,Bmx,C3ar1,Casp1,Ccr2,Ccr7,Ccr8,Cd19,Cd274,Cd276,Cd40lg,Cd44,Cd55,Cry2,Csf3,Ctsl,Ctss,Cx3cr1,Def6,Dtx1,E2f2,Ecm1,Elf1,F2,Fadd,Fasl,Fcgr1,Fcgr2b,Fcgr3,Fcrlb,Gadd45a,Gadd45b,Gna13,H2-Ab1,H2-T23,Hc,Hr,Id3,Ifnar1,Ifngr2,Ikzf3,Il10ra,Il12rb2,Il1a,Il1b,Il21r,Il27,Il2rb,Il4,Il4ra,Il6,Il9r,Itgb2,Ksr1,Lat,Lcp2,Lepr,Lgals1,Lgals9,Lin9,Ltb4r1,Map…	NA
Mouse Phenotype	abnormal immunoglobulin level	0		0					1.65111e-156			0		Ada,Apoe,Arhgef1,Arid3a,Atf3,B2m,BC096441,Bak1,Batf,Bax,Bcl10,Bcl3,Birc3,Bst1,Ccl2,Ccr10,Ccr2,Ccr4,Ccr5,Ccr7,Cd19,Cd22,Cd28,Cd69,Cd72,Cd74,Cd79a,Cd80,Cd81,Cd83,Cd84,Cebpb,Cxcr2,Cxcr4,Dapp1,Dbnl,Def6,Dll1,Dusp4,Ecm1,Fasl,Fcer1g,Fcer2a,Fcgr1,Fcgr2b,Fcgrt,Fcrla,Fcrlb,Fli1,Flt3l,Foxn1,Gabpb2,Gadd45b,Gcnt3,Ggta1,Gimap5,Gnai2,Gp49a,Gpr132,Grb2,H2-Ab1,H2afx,Hexb,Hrh1,Id3,Ifnar1,Ifngr1,Igll1,Ikzf1,Il10ra…	NA	Ada,Apobec3,Arid3a,Arntl,B2m,BC096441,Bank1,Bbs4,Bcl10,Birc3,Bst1,C3,Ccr10,Ccr2,Ccr5,Ccr7,Cd19,Cd40lg,Cd80,Cd81,Cebpb,Chi3l1,Crlf2,Csf2rb,Csf2rb2,Ctla4,Cxcl9,Dapp1,Ecm1,Esr2,F2rl1,Fasl,Fcgr2b,Fcrla,Fcrlb,Fkbp11,Foxp3,Fyn,Gadd45a,Gata3,Gcnt3,Ggta1,Gpr183,Grb2,Hdac6,Hrh1,Icos,Id3,Ifnar1,Ifnar2,Ikzf1,Il21r,Il2rb,Il2rg,Il4,Il4ra,Inpp5d,Irf1,Irf2,Itgb2,Itgb3,Itpkb,Kit,Klf2,Klra10,Lat,Lcp2,Ltb4r1,Malt1…	NA	NA	NA	NA	Adcy9,Bach2,Cd69,Cd84,Cebpb,Dusp4,Fli1,Ggta1,Gimap5,Id3,Ikzf1,Il21r,Il4ra,Irf2,Itgb3,Itpkb,Klf2,Klra10,Lta,Ltb,Lyn,Nfkbia,Nos2,Plcg2,Rgs1,Runx3,Sema4b,Stat1,Tec,Tlr7,Tlr8,Tnf,Zc3h12a	NA	NA	Ada,Adcy9,Apoe,Arntl,Atf3,Atm,B2m,BC096441,Bak1,Bax,Bcl10,Bcl2l11,Birc3,Blm,C3ar1,Cabin1,Ccr10,Ccr2,Ccr5,Ccr7,Cd19,Cd40lg,Cd72,Cebpb,Csf2rb,Csf2rb2,Ctse,Ctss,Dapp1,Def6,Dok1,Ecm1,Esr2,Fasl,Fcgr1,Fcgr2b,Fcrla,Fcrlb,Fli1,Flt3l,Foxn1,Gadd45a,Gadd45b,Gcnt3,Ggta1,Gnai2,Gpr183,Grb2,H2-Ab1,H2afx,Hdac6,Hr,Hrh1,Id3,Ifnar1,Ifnar2,Igll1,Ikzf1,Ikzf3,Il10ra,Il21r,Il2rb,Il4,Il4ra,Il6,Inpp5d,Irf2,Irf8,Itgb2,Itg…	NA
Mouse Phenotype	abnormal induced morbidity/mortality	0										0		Abca2,Abcc1,Ace,Adam17,Adamts13,Adh5,Adipoq,Adora2b,Agrp,Als2,Angptl4,Antxr1,Apoe,Atf6,Atp2a2,B2m,Bcl3,Brca2,C4b,Cacna1a,Ccl2,Ccnd1,Ccr2,Cd19,Cd3e,Cd44,Cd97,Cerk,Clec4n,Clec7a,Clic4,Cox15,Cpa3,Cpb2,Cx3cr1,Cxcl5,Cxcr2,Cxcr3,Dnase1,Dock2,Ercc1,Ewsr1,F2r,F3,Faim3,Fcer1g,Flt3,G6pc3,Gnai2,Gnaz,Gsta3,H2-D1,H2-K1,H2afx,Hcst,Hif1a,Hmox2,Hspa1b,Icam1,Ifnar1,Ifngr1,Il17f,Il2ra,Il6,Il6st,Ing1,Insr,Irak2,Irf…	NA	NA	NA	NA	NA	NA	NA	NA	NA	Abca2,Abcc1,Abcc4,Ace,Adm,Agrp,Als2,Angptl4,Antxr1,Apoe,Aqp3,Arx,Atf6,Atm,B2m,Bid,C3ar1,C5ar1,Cacna1a,Casp1,Casp12,Ccr2,Cd19,Cd226,Cd44,Cd47,Cd97,Cerk,Chek2,Clcn3,Clec4n,Clic4,Cpa3,Cpb2,Ctsg,Cx3cr1,Cxcl5,Erbb2,Ercc1,Esr2,Ewsr1,F2r,Fabp3,Fads2,Flt3,Foxo3,Gnai2,Gpr98,Gzmb,H2afx,Hp,Hr,Hspa1b,Ifih1,Ifnar1,Ifnar2,Il1b,Il6,Irak2,Irf8,Itgb3,Keap1,Khsrp,Lepr,Lif,Lpl,Ltbr,Map2k3,Map3k1,Map4k2,Mapk14,Mapka…	NA
Mouse Phenotype	abnormal inflammatory response	0		0					1.89098e-235			0		Abcb4,Abcc1,Acan,Ace,Ada,Adam17,Adora2b,Agt,Agtr1b,Als2,Ank,Aoc3,Apc,Apoa4,Apoe,Aprt,Arhgdia,Arl3,Arrb2,Arsa,Atf3,Atp7a,Axl,B2m,B4galt1,B9d2,BC096441,Bag4,Bak1,Bax,Bin3,Birc3,Bmp7,Bmp8b,Bsg,C4b,Casp3,Cbs,Ccbp2,Ccl1,Ccl11,Ccl2,Ccl25,Ccl3,Ccm2,Ccnd1,Ccr1,Ccr2,Ccr4,Ccr5,Ccr7,Cd19,Cd28,Cd33,Cd38,Cd44,Cd69,Cd80,Cdsn,Cebpa,Cebpb,Cebpe,Cfb,Chd2,Chuk,Clec5a,Clec7a,Clic4,Cnp,Col2a1,Comp,Cpb2,Cr1l,Cry2,Csf…	NA	Abca1,Abcc1,Abcc4,Ace,Ada,Adamts5,Adora3,Agtr1a,Agtr1b,Aimp1,Alox5,Als2,Ank,Anxa5,Aoc3,Apcs,Aprt,Aqp3,Arntl,Atp7a,Axl,B2m,B4galt1,B9d2,BC096441,Bag4,Birc3,Bmp5,Bmx,C1galt1,C3,C4b,Cacna2d2,Casp3,Cbfa2t2,Cbl,Ccr1,Ccr2,Ccr5,Ccr7,Cd19,Cd276,Cd38,Cd40lg,Cd44,Cd80,Cebpb,Cfb,Clic4,Comp,Cr1l,Creb3l3,Crlf2,Cry2,Csf2rb,Ctla4,Ctnnb1,Ctsg,Cxcl9,Cybb,Diap1,Dkc1,Dnase1,Drosha,Dtx1,Dusp1,E2f1,E2f2,Ebi3,Egr1,Eif…	NA	NA	NA	NA	Agt,Alox5ap,Bmp7,Ccl3,Cd276,Cd69,Cdsn,Cebpb,Clec7a,Clic4,Cpb2,Dusp2,E2f2,Epha1,F2r,Fads2,Gimap5,Golm1,H2-D1,Id3,Ikzf1,Il12a,Il21r,Il4ra,Il6ra,Irf2,Itgb3,Ksr1,Lgals9,Litaf,Lta,Ltb,Ltc4s,Lyn,Mbtps1,Ncf1,Nfkbia,Nos2,Notch1,Pdx1,Pla2g4a,Plcg2,Psap,Runx3,Smtn,Socs1,Stat1,Stat4,Tlr7,Tlr8,Tnf,Tom1l2,Zc3h12a	NA	NA	Abca1,Abcb4,Abcc1,Abcc4,Abcg1,Ace,Ada,Adamts5,Adm,Adora3,Agtr1b,Ahi1,Alox5,Als2,Ank,Aoc3,Apoa4,Apoe,Aprt,Aqp3,Ar,Arntl,Arsa,Atf3,Atp7a,Axl,B2m,B4galt1,B9d2,BC096441,Bak1,Bax,Bcl2l11,Bid,Birc3,Bmpr1a,Bmx,Bsg,C1galt1,C3ar1,Cacna2d2,Casp1,Casp12,Casp3,Casp4,Cbl,Cbs,Cby1,Ccr1,Ccr2,Ccr5,Ccr7,Cd19,Cd276,Cd40lg,Cd44,Cebpb,Cebpe,Chd2,Chrna3,Chrnb4,Clic4,Col4a3,Comp,Cpb2,Creb3l3,Cry2,Csf1,Csf2rb,Csk,Ctse,…	NA
Mouse Phenotype	abnormal innate immunity	0		0					5.02935e-174			0		AI848100,Adam17,Adora2b,Adrb2,Aim2,Apoe,Arhgef1,Atg9a,Axl,B4galt1,Bag4,Bcl3,Birc3,Camk2g,Card9,Casp3,Ccl2,Ccr1,Ccr2,Ccr5,Cd44,Cd69,Cd81,Cebpb,Cebpe,Cfb,Chuk,Clec4e,Clec7a,Cnpy3,Cnr2,Cpb2,Cr1l,Cry2,Csf1,Csf3r,Ctnnb1,Ctsc,Cx3cr1,Cxcl16,Cxcl5,Cxcr2,Cxcr3,Ddit3,Dock2,Dok2,Dusp2,Dusp4,Egr1,Ero1l,F3,Farp2,Fasl,Fcer1g,Fcer2a,Fcgr1,Fcgr2b,Fcgr3,Fgr,Flot1,Flt3,Fos,Fosl2,Fut4,Fut7,G6pc3,Git2,Glb1,Gnai2,Gpr…	NA	AI848100,Abca1,Adora3,Adrb2,Alox5,Arhgap15,Atg9a,Axl,B3gnt2,B4galt1,Bag4,Birc3,C3,Camk2d,Camk2g,Card9,Casp3,Ccr1,Ccr2,Ccr5,Cd44,Cd47,Cd55,Cd59a,Cd81,Cebpb,Cfb,Chi3l1,Clcn3,Clec4e,Cnpy3,Cnr2,Cr1l,Creb3l3,Cry2,Ctnnb1,Ctsc,Cybb,Ddit3,Dock3,Dusp1,Egr1,Ero1l,Fads2,Fasl,Fastk,Fcer1a,Fcgr2b,Fcgr3,Fga,Fgg,Fgr,Flot1,Flt3,Fyn,Git2,Icam1,Idua,Ier3,Ifnar1,Ifnar2,Igf1r,Il1a,Il1b,Il2rg,Il4,Il4ra,Inpp5d,Irak2,I…	NA	NA	NA	NA	Alox5ap,B3gnt2,Cd69,Cebpb,Clec7a,Cnn2,Cnr2,Cpb2,Csf3r,Ctsc,Dusp2,Dusp4,Fads2,Flot1,Flt1,Flt3,Ier3,Il4ra,Itgb3,Lta,Lyn,Mrc1,Ncf1,Nfkbia,Nos2,Pla2g4a,Prex1,Psap,Rab27a,Slamf1,Slamf6,Socs1,Sqstm1,Stat1,Tff2,Tlr7,Tnf	NA	NA	AI848100,Abca1,Abcg1,Acp5,Adora3,Adrb2,Aim2,Alox5,Apoe,Arhgap15,Atg9a,Atm,Axl,B3gnt2,B4galt1,Birc3,Bmpr1a,C3ar1,C5ar1,Camk2g,Casp1,Casp3,Ccr1,Ccr2,Ccr5,Cd44,Cd47,Cd55,Cd59a,Cd9,Cebpb,Cebpe,Clcn3,Clcn7,Clec4e,Cnpy3,Cnr2,Cpb2,Creb3l3,Cry2,Csf1,Csf3,Csf3r,Ctsl,Cx3cl1,Cx3cr1,Cxcl5,Cyba,Ddit3,Dock3,Dok1,Dok3,Egr1,Ero1l,Fads2,Farp2,Fasl,Fcgr1,Fcgr2b,Fcgr3,Fgr,Flot1,Flt1,Flt3,Fut7,Git2,Gnai2,H2-Aa,H2-Ab…	NA
Mouse Phenotype	abnormal intercellular signaling peptide or protein level	0		0					4.80605e-127			0		Ace,Adam17,Adora2b,Aim2,Apoe,Arhgdia,Arhgdib,Arrb2,Axl,B2m,Bag4,Card9,Cbs,Ccl2,Ccl3,Ccr2,Ccr3,Ccr5,Cd19,Cd28,Cd44,Cebpb,Clic4,Cpb2,Cry2,Csf1,Csf1r,Ctsc,Cxcl16,Cxcl5,Cxcr2,Cxcr3,Darc,Dtx1,Ebi3,Egr1,F2r,F3,Fasl,Flt3,Fos,Foxn1,Gimap5,Gnai2,Gp49a,Hexb,Hif1a,Icam1,Ido1,Ier3,Ifnar1,Ifngr1,Il10ra,Il10rb,Il12rb2,Il4ra,Il6,Il6ra,Il6st,Inpp5d,Irak2,Irf1,Irgm1,Itgav,Kit,Klra10,Klra17,Lepr,Lgals3bp,Lilrb4,Lt…	NA	Ace,Axl,B2m,Bag4,C3,Card9,Ccr2,Ccr3,Ccr5,Cd19,Cd44,Cd47,Cebpb,Clic4,Cry2,Ctla4,Ctsc,Dtx1,Dusp1,Ebi3,Egr1,F2r,F2rl1,Fasl,Fcer1a,Flt3,Foxp3,Fyn,Gata1,Icam1,Icos,Ier3,Ifih1,Ifnar1,Ifnar2,Il10rb,Il1a,Il1b,Il4ra,Inpp5d,Irak2,Irf1,Irgm1,Itgav,Itgb2,Itgb3,Kit,Klra10,Klra17,Lepr,Map3k14,March7,Mcpt1,Mpz,Ncoa3,Nfatc2ip,Nfkb1,Ngfr,Nlrp6,Nr3c1,Otc,Plau,Prkab1,Ptpn6,Rac2,Rag1,Runx3,Samsn1,Spon2,Stat3,Stat5b,…	NA	NA	NA	NA	Ccl3,Cebpb,Clic4,Cpb2,Ctsc,F2r,Flt3,Gimap5,Ier3,Il12a,Il4ra,Il6ra,Itgb3,Klra10,Klra17,Lta,Lyn,Nfkbia,Pla2g4a,Runx3,Slamf6,Socs1,Stat1,Stat4,Tlr7,Tlr8,Tnf	NA	NA	Ace,Aim2,Apoe,Arhgdib,Axl,B2m,C3ar1,Casp1,Casp12,Casp4,Cbs,Ccr2,Ccr3,Ccr5,Cd19,Cd44,Cd47,Cebpb,Clic4,Cpb2,Cry2,Csf1,Ctse,Cxcl5,Darc,Dtx1,Ebi3,Egr1,F2r,Fasl,Flt3,Foxn1,Gata1,Gnai2,Htra2,Ier3,Ifih1,Ifnar1,Ifnar2,Igtp,Il10ra,Il10rb,Il12rb2,Il1a,Il1b,Il4ra,Il6,Inpp5d,Irak2,Irgm1,Itgb2,Itgb3,Lep,Lepr,Lgmn,Lif,Ltbr,Map4k2,Mapkapk2,March7,Mcpt1,Mpz,Mta2,Myd88,Ncoa3,Nfatc2ip,Nfe2l2,Nfkb1,Ngfr,Nr3c1,Parp1…	NA
Mouse Phenotype	abnormal interferon-gamma secretion	0										0		Apoe,BC096441,Bcl3,Ccl2,Ccl5,Ccr2,Ccr4,Ccr5,Cd19,Cd247,Cd28,Cd74,Cd79a,Cd80,Clec4n,Comt,Cxcl16,Dtx1,Dusp4,Ebi3,Erap1,Fcer1g,Fgr,Flt3,Foxn1,Gadd45b,Gimap5,Gnai2,H2-Ab1,H2-T3,Hcst,Hif1a,Hrh1,Ifnar1,Ifngr1,Il10rb,Il12rb2,Il21r,Il6,Il6st,Ins1,Irf1,Irf8,Lat,Lgals1,Lta,Map3k3,Map3k4,Mapk14,Mapkapk2,Mmp9,Myd88,Nfatc2ip,Nfkbid,Nos2,Orai1,Pdcd1lg2,Pdlim2,Pecam1,Pgp,Pigr,Pilrb1,Pip5k1c,Pla2g4a,Plcg1,Pou2af…	NA	NA	NA	NA	NA	NA	NA	NA	NA	Apoe,BC096441,Casp1,Casp12,Ccr2,Ccr5,Cd19,Cd226,Cd247,Cd274,Cd276,Clec4n,Comt,Drosha,Dtx1,Ebi3,Fgr,Flt3,Foxn1,Gadd45b,Gnai2,H2-Ab1,H2-T3,Hrh1,Ifnar1,Ifnar2,Il10rb,Il12rb2,Il1b,Il21r,Il4,Il6,Irf8,Itgb2,Itk,Lat,Lcp2,Lgals1,Map3k3,Map3k4,Mapk14,Mapkapk2,Mbp,Myd88,Nfatc2ip,Nos2,Orai1,Pdcd1lg2,Pgp,Plcg1,Plcg2,Prkcq,Ptger1,Ptger4,Rcan1,Rftn1,Rsad2,Sash3,Sit1,Slc11a1,Stat3,Stat6,Tbk1,Tbx21,Tgfb1,Tnfrsf1…	NA
Mouse Phenotype	abnormal interferon secretion	0										0		Aim2,Apoe,Atg9a,BC096441,Bcl3,Ccl2,Ccl5,Ccr2,Ccr4,Ccr5,Cd19,Cd247,Cd28,Cd74,Cd79a,Cd80,Clec4n,Comt,Cxcl16,Dtx1,Dusp4,Ebi3,Erap1,Fcer1g,Fgr,Flt3,Foxn1,Gadd45b,Gimap5,Gnai2,H2-Ab1,H2-T3,Hcst,Hif1a,Hrh1,Ifna6,Ifnar1,Ifngr1,Il10rb,Il12rb2,Il21r,Il6,Il6st,Ins1,Irf1,Irf8,Klra17,Lat,Lgals1,Lgals3,Lta,Map3k3,Map3k4,Mapk14,Mapkapk2,Mmp9,Myd88,Nfatc2ip,Nfkbid,Nos2,Orai1,Pdcd1lg2,Pdlim2,Pecam1,Pgp,Pigr,Pilr…	NA	NA	NA	NA	NA	NA	NA	NA	NA	Aim2,Apoe,Atg9a,BC096441,Casp1,Casp12,Ccr2,Ccr5,Cd19,Cd226,Cd247,Cd274,Cd276,Clec4n,Comt,Drosha,Dtx1,Ebi3,Fgr,Flt3,Foxn1,Gadd45b,Gnai2,H2-Ab1,H2-T3,Hrh1,Ifih1,Ifna6,Ifnar1,Ifnar2,Il10rb,Il12rb2,Il1b,Il21r,Il4,Il6,Irf8,Irf9,Itgb2,Itk,Khsrp,Lat,Lcp2,Lgals1,Map3k3,Map3k4,Mapk14,Mapkapk2,Mbp,Myd88,Nfatc2ip,Nos2,Orai1,Pdcd1lg2,Pgp,Plcg1,Plcg2,Prkcq,Ptger1,Ptger4,Rcan1,Rftn1,Rsad2,Runx1,Runx3,Sash3,Sit…	NA
Mouse Phenotype	abnormal interleukin level	0		0					2.48823e-78			0		Ace,Adam17,Adora2b,Aim2,Apoe,Arhgdia,Arhgdib,Arrb2,B2m,Bag4,Cbs,Ccl2,Ccr3,Cd19,Cd28,Cd44,Cebpb,Clic4,Cry2,Ctsc,Cxcl16,Cxcl5,Cxcr2,Ebi3,F3,Fasl,Flt3,Fos,Foxn1,Gimap5,Gnai2,Gp49a,Hexb,Icam1,Ier3,Ifnar1,Ifngr1,Il10ra,Il10rb,Il12rb2,Il4ra,Il6,Il6ra,Il6st,Inpp5d,Irak2,Irf1,Irgm1,Itgav,Kit,Klra17,Lepr,Lgals3bp,Lilrb4,Map4k2,March7,Mbl2,Mmp9,Mta2,Myd88,Ncoa3,Nfatc2ip,Nfe2l2,Nfkbia,Nlrp6,Nr3c1,Parp1,Pgly…	NA	Ace,B2m,Bag4,Ccr3,Cd19,Cd44,Cebpb,Clic4,Cry2,Ctsc,Dusp1,Ebi3,F2rl1,Fasl,Fcer1a,Flt3,Foxp3,Gata1,Icam1,Icos,Ier3,Ifih1,Ifnar1,Ifnar2,Il10rb,Il1a,Il1b,Il4ra,Inpp5d,Irak2,Irf1,Irgm1,Itgav,Itgb2,Kit,Klra17,Lepr,Map3k14,March7,Ncoa3,Nfatc2ip,Nfkb1,Nlrp6,Nr3c1,Otc,Prkab1,Ptpn6,Rac2,Rag1,Runx3,Spon2,Stat3,Stat5b,Tbx21,Tgfb1,Ticam1,Tlr8,Trafd1,Trem2,Trp53,Zfp35	NA	NA	NA	NA	Cebpb,Clic4,Ctsc,Flt3,Gimap5,Ier3,Il12a,Il4ra,Il6ra,Klra17,Nfkbia,Runx3,Slamf6,Socs1,Stat1,Stat4,Tlr8,Tnf	NA	NA	Ace,Aim2,Apoe,Arhgdib,B2m,C3ar1,Casp1,Casp12,Casp4,Cbs,Ccr3,Cd19,Cd44,Cebpb,Clic4,Cry2,Ctse,Cxcl5,Ebi3,Fasl,Flt3,Foxn1,Gata1,Gnai2,Htra2,Ier3,Ifih1,Ifnar1,Ifnar2,Igtp,Il10ra,Il10rb,Il12rb2,Il1a,Il1b,Il4ra,Il6,Inpp5d,Irak2,Irgm1,Itgb2,Lepr,Lif,Map4k2,March7,Mta2,Myd88,Ncoa3,Nfatc2ip,Nfe2l2,Nfkb1,Nr3c1,Parp1,Pla2g10,Prkce,Ptger4,Ptpn6,Rac2,Ramp1,Relb,Rps6ka4,Runx3,Socs1,Spon2,Stat3,Tbk1,Tbx21,Tgfb1…	NA
Mouse Phenotype	abnormal interleukin secretion	0		0					6.69058e-139			0		Abi1,Adam17,Adora2b,Aim2,Apoe,Arrb2,Atf3,Atg9a,B2m,BC096441,Bag4,Batf,Bcl3,Birc3,Card9,Ccl2,Ccl5,Ccnd1,Ccr2,Ccr4,Ccr5,Cd19,Cd28,Cd300lf,Cd44,Cd74,Cd79a,Cd80,Cd84,Cebpb,Clec4e,Clec4n,Clic4,Cnpy3,Creb1,Cxcl16,Dbnl,Dtx1,Dusp4,Ebi3,Ezr,F3,Fcer1g,Flt3,Fos,Gadd45b,Gimap5,Gna13,Gnai2,H2-Ab1,H2-T3,Hcst,Hif1a,Hrh1,Hsh2d,Hspa1b,Ifngr1,Il10rb,Il12rb2,Il17f,Il17ra,Il21r,Il4ra,Il6,Il6st,Impdh1,Inpp5d,Irak2,Ir…	NA	Abi1,Arhgef6,Atg9a,B2m,B3gnt2,BC096441,Bag4,Birc3,Card9,Ccr2,Ccr5,Ccrl2,Cd19,Cd200r1,Cd274,Cd300lf,Cd44,Cd80,Cebpb,Chi3l1,Clec4e,Clec4n,Clic4,Cnpy3,Creb1,Csf2rb,Csf2rb2,Ctla4,Drosha,Dtx1,Dusp1,E2f1,Ebi3,Fastk,Flt3,Foxp3,Fyb,Fyn,Gata3,Gfi1,Gnai1,Hrh1,Hsh2d,Hspa1b,Icos,Ifih1,Il10rb,Il1a,Il1b,Il21r,Il2rg,Il33,Il4,Il4ra,Inpp5d,Irak2,Irak3,Klf2,Klra10,Klra17,Ksr1,Laptm5,Lat,Lcp2,Lepr,Lgals1,Malt1,Map3…	NA	NA	NA	NA	Adora2a,B3gnt2,Ccl5,Cd84,Cebpb,Clic4,Dusp4,Flt3,Fyb,Gimap5,Hivep3,Hsh2d,Il21r,Il4ra,Klf2,Klra10,Klra17,Ksr1,Mbtps1,Notch1,Prkcq,Slamf6,Socs1,Sqstm1,Stat1,Stat4,Sucnr1,Tlr7,Tlr8,Tnf,Zc3h12a	NA	NA	Aim2,Apoe,Arhgef6,Atf3,Atg9a,B2m,B3gnt2,BC096441,Birc3,C3ar1,Casp1,Casp12,Ccr2,Ccr5,Ccrl2,Cd19,Cd200r1,Cd274,Cd44,Cebpb,Clec4e,Clec4n,Clic4,Cnpy3,Csf2rb,Csf2rb2,Ctse,Ctss,Drosha,Dtx1,Ebi3,Ezr,Flt3,Fyb,Gadd45b,Gfi1,Gna13,Gnai1,Gnai2,Gnai3,H2-Ab1,H2-T3,Hivep3,Hrh1,Hsh2d,Hspa1b,Ifih1,Il10rb,Il12rb2,Il17ra,Il1a,Il1b,Il21r,Il4,Il4ra,Il6,Impdh1,Inpp5d,Irak2,Irak3,Irf8,Itk,Klf2,Ksr1,Laptm5,Lat,Lcp2,Lep,…	NA
Mouse Phenotype	abnormal kidney cortex morphology	0										0		AI848100,Ace,Actn4,Ada,Adipoq,Agt,Agtr1b,Apoe,Aprt,Aqp11,Arhgdia,Atp7a,Bak1,Bax,Bcam,Bmp7,C4b,Ccni,Ccr2,Cd19,Cebpb,Cfb,Chd2,Comt,Cpb2,Dnase1,Dtx1,E2f2,Ehd2,Ehd4,Etv5,Fasl,Fbln1,Fcer1g,Fcgr2b,Fgfr2,Fh1,Flcn,Gadd45b,Glb1,Glis2,Gne,Gpr4,Gtf3c2,Ifnar1,Ifngr1,Igf2bp1,Il12rb2,Il5ra,Inpp5e,Irf1,Itga3,Kit,Lama5,Lat,Ldb1,Lepr,Lgals3,Limk2,Lmx1b,Lyn,Mafb,Man2a1,Mdm4,Mgat2,Mgat5,Mmp9,Mt1,Mt2,Mta2,Naglu,Nfe2…	NA	NA	NA	NA	NA	NA	NA	NA	NA	AI848100,Abca1,Ace,Actn4,Ada,Adm,Agtr1b,Angpt1,Apoe,Aprt,Aqp11,Atp7a,Bak1,Bax,Bcam,Bcl2l11,C1galt1,Ccni,Ccr2,Cd19,Cd55,Cebpb,Chd2,Chrna3,Col4a3,Col4a4,Comt,Cpb2,Dkc1,Dtx1,E2f2,Ehd2,Fasl,Fcgr2b,Fgf8,Gadd45a,Gadd45b,Golm1,Gpc3,Hp,Hr,Ifnar1,Igf2bp1,Ikzf3,Il12rb2,Il4,Itga1,Itga3,Kif26b,Kif3a,Lama5,Lamc1,Lat,Lepr,Lgr4,Lmx1b,Mapt,Mdm4,Mt1,Mt2,Mta2,Nek1,Nek8,Nfe2l2,Nkx3-1,Nos2,Nr3c2,Ovol1,Pbx1,Pdgfb,Pds…	NA
Mouse Phenotype	abnormal kidney physiology	0		0								0		Abcc6,Ace,Actn4,Adipoq,Agt,Agtr1b,Apoe,Aprt,Aqp11,Arhgdia,Bak1,Bax,Braf,C4b,Ccni,Ccr2,Cd19,Cd300lb,Cd63,Cdk4,Cdkn1b,Cebpb,Chuk,Cno,Col2a1,Comt,Ctsa,Cubn,Cx3cr1,Cxcr3,Cxcr4,Cyp4a10,Cyp4a14,Dnase1,Dtx1,E2f2,Ednrb,Ehd2,Ehd4,Ercc1,Ewsr1,Fasl,Fbn1,Fcer1g,Fcgr2b,Fh1,Flcn,Gadd45b,Gipc1,Glis2,Gna11,Gnaq,Gne,Gpr132,Gpr4,Gtf3c2,H2-Ab1,Hif1a,Hps4,Hsd11b2,Ifnar1,Ifngr1,Il12rb2,Il5ra,Insr,Irf1,Itga3,Kit,Lama5…	NA	Abca1,Abcc4,Abcc6,Ace,Adamts1,Adora1,Adora3,Agtr1a,Agtr1b,Apcs,Aprt,Aqp11,Aqp2,Aqp3,Aqp7,Avpr2,C1galt1,C4b,Car2,Ccr2,Cd19,Cd55,Cd59a,Cd59b,Cdkn1b,Cebpb,Clcn3,Cldn2,Cno,Comt,Cubn,Cybb,Dnase1,Dtx1,E2f2,Ewsr1,F2rl1,Fasl,Fbn1,Fcgr2b,Foxo3,Fyn,Gadd45a,Gipc1,Golm1,Gtf3c2,Guca2b,Hnf1a,Hps4,Hsd11b2,Ifnar1,Il4,Irf1,Kcnk5,Kif3a,Kit,Lamc1,Lat,Ldb1,Lepr,Lmx1b,Map3k14,Mtss1,Mut,Muted,Ncoa3,Nedd4l,Nos2,Pik3c2a…	NA	NA	NA	NA	NA	NA	NA	Abca1,Abcc4,Abcc6,Ace,Actn4,Adcy6,Adm,Adora3,Agtr1b,Ahi1,Apoe,Aprt,Aqp1,Aqp11,Aqp3,Aqp7,Bak1,Bax,Bcl2l11,C1galt1,Car2,Casp1,Ccni,Ccr2,Cd19,Cd55,Cd59a,Cd59b,Cdkn1b,Cebpb,Clcn3,Cno,Col4a3,Col4a4,Comt,Cubn,Cx3cr1,Cyp11b2,Cyp4a10,Cyp4a14,Dapk1,Dtx1,E2f2,Ehd2,Ercc1,Ewsr1,Fasl,Fcgr2b,Fgf8,Foxo3,Gadd45a,Gadd45b,Gipc1,Gna11,Golm1,Gucy2g,H2-Ab1,Hnf1a,Hp,Hps4,Hps5,Hr,Hsd11b2,Ifnar1,Ikzf3,Il12rb2,Il4,Itga1,…	NA
Mouse Phenotype	abnormal leukocyte cell number	0		0					2.96686420327669e-320		1.11734e-204	0		AI848100,Ace,Ada,Adam10,Adam17,Adipoq,Aff1,Aim2,Akt1,Akt3,Ankrd11,Apc,Apoa1,Apoa4,Apoc3,Apoe,Arhgdia,Arhgdib,Arhgef1,Arid3a,Atp7b,Axl,B2m,B4galt1,B9d2,BC096441,Bak1,Batf,Batf3,Bax,Bcl10,Bcl11a,Bcl3,Bik,Birc2,Birc3,Birc5,Braf,Brca2,Bst1,C4b,Casp3,Cbfa2t3,Ccl11,Ccl2,Ccl25,Ccl3,Ccl5,Ccnd1,Ccr1,Ccr10,Ccr2,Ccr3,Ccr4,Ccr5,Ccr7,Cd19,Cd22,Cd247,Cd24a,Cd28,Cd34,Cd3d,Cd3e,Cd3g,Cd44,Cd48,Cd5l,Cd69,Cd72,Cd74…	NA	2010002N04Rik,AI848100,Ace,Ada,Adam10,Aff1,Ankrd11,Arhgap15,Arhgef6,Arid3a,Arid4b,Arntl,Asxl1,Axl,B2m,B4galt1,B9d2,BC096441,Bank1,Bcl10,Bcl11a,Bik,Birc2,Birc3,Blk,Bnip3l,Bst1,C3,C4b,Casp3,Cbfa2t3,Cbl,Ccr1,Ccr10,Ccr2,Ccr3,Ccr5,Ccr7,Cd19,Cd247,Cd24a,Cd274,Cd40lg,Cd44,Cd47,Cd80,Cd81,Cd97,Cdkn1b,Cebpb,Cerk,Chi3l1,Chst3,Clec4e,Col10a1,Cpa3,Cr1l,Crlf2,Csf2rb,Ctcf,Ctla4,Ctnnb1,Ctsd,Ctsg,Dapp1,Dck,Dffb,D…	NA	NA	NA	NA	Akt1,Bach2,Bcl11a,Ccl3,Ccl5,Cd48,Cd69,Cd84,Cdkn2a,Cdkn2b,Cebpb,Chst3,Clec2d,Cnn2,Csf3r,Dock8,E2f2,Elk4,Ets1,Fli1,Flt3,Fyb,Ggta1,Gimap1,Gimap5,Gsx1,H2-D1,Hivep3,Id3,Ier3,Ikzf1,Il21r,Il4ra,Irf2,Itgb3,Itpkb,Klf2,Klhl6,Klra17,Lgals9,Lta,Ltb,Lyn,Mdm4,Myh9,Nfkbia,Nos2,Notch1,Pik3r1,Plcg2,Prex1,Prkcq,Rgs1,Runx3,Serpinb2,Sin3b,Slc46a2,Socs1,Sp3,Sqstm1,Stat1,Tec,Tlr7,Tlr8,Tnf,Tom1l2,Txnip,Ubash3a,Vsig4,Zc…	NA	2010002N04Rik,AI848100,Aim2,Ankrd11,Arid3a,Bbc3,Cbfa2t3,Ccr1,Ccr2,Ccr3,Ccr5,Cd47,Chst3,Csf2rb,Dapp1,E2f2,Fasl,Gata1,Ggta1,Id3,Il2rb,Klf13,Lgals9,Lgmn,Lyl1,Mpo,Mtf1,Mxd1,Nfe2,Nos2,Pim2,Ptpn22,Ptprj,Rabgef1,Rfx5,Runx1,Runx3,Spna1,St3gal1,Suv420h2,Thoc5,Tnfrsf13c,Xrcc6,Zfpm1	AI848100,Abcg1,Ace,Ada,Aff1,Aim2,Akt1,Ankrd11,Apoa1,Apoa4,Apoc3,Apoe,Ar,Arhgap15,Arhgdib,Arhgef6,Arid4a,Arid4b,Arntl,Atm,Axl,B2m,B4galt1,B9d2,BC096441,Bak1,Batf3,Bax,Bcl10,Bcl2l11,Bik,Birc2,Birc3,Birc5,Bmpr1a,C3ar1,Casp3,Cbfa2t3,Cbl,Ccna2,Ccr1,Ccr10,Ccr2,Ccr3,Ccr5,Ccr7,Cd19,Cd247,Cd24a,Cd274,Cd40lg,Cd44,Cd47,Cd72,Cd9,Cd97,Cdkn1b,Cds2,Cebpb,Cebpe,Cerk,Cflar,Chd2,Chd4,Chek2,Chst3,Cks1b,Clec4e,Cpa3,…	NA
Mouse Phenotype	abnormal leukocyte morphology	0		0					0		2.69225e-256	0		AI848100,Abi1,Ace,Ada,Adam10,Adam17,Adipoq,Adrb2,Aff1,Aim2,Akt1,Akt3,Amhr2,Ank,Ankrd11,Apc,Apoa1,Apoa4,Apoc3,Apoe,Appl1,Arhgdia,Arhgdib,Arhgef1,Arid3a,Arsa,Atp7b,Axl,B2m,B4galt1,B9d2,BC096441,Bak1,Batf,Batf3,Bax,Bcl10,Bcl11a,Bcl3,Bik,Birc2,Birc3,Birc5,Braf,Brca2,Bst1,C4b,Carm1,Casp3,Cbfa2t3,Ccl11,Ccl2,Ccl25,Ccl3,Ccl5,Ccl7,Ccm2,Ccnd1,Ccnd2,Ccr1,Ccr10,Ccr2,Ccr3,Ccr4,Ccr5,Ccr7,Cd19,Cd207,Cd22,Cd247,…	NA	2010002N04Rik,AI848100,Abhd5,Abi1,Ace,Ada,Adam10,Adrb2,Aff1,Amhr2,Ank,Ankrd11,Aplf,Arhgap15,Arhgef12,Arhgef6,Arid3a,Arid4b,Arntl,Asxl1,Axl,B2m,B3gnt2,B4galt1,B9d2,BC096441,Bank1,Bcl10,Bcl11a,Bik,Birc2,Birc3,Blk,Bnip3l,Bst1,Btrc,C3,C4b,Casp3,Cbfa2t3,Cbl,Ccnd2,Ccr1,Ccr10,Ccr2,Ccr3,Ccr5,Ccr7,Cd19,Cd247,Cd24a,Cd274,Cd276,Cd40lg,Cd44,Cd47,Cd80,Cd81,Cd97,Cdkn1b,Cebpb,Cerk,Chi3l1,Chst3,Clec4e,Clec4n,Col…	NA	NA	NA	NA	Akt1,B3gnt2,Bach2,Bcl11a,Ccl3,Ccl5,Cd276,Cd48,Cd69,Cd84,Cdkn2a,Cdkn2b,Cebpb,Chst3,Clec1b,Clec2d,Cnn2,Csf3r,Dock8,E2f2,Elk4,Ern1,Ets1,Fli1,Flt3,Fyb,Ggta1,Gimap1,Gimap5,Gsx1,H2-D1,Hivep3,Hmga1,Hsh2d,Id3,Ier3,Ikzf1,Il21r,Il4ra,Irf2,Itgb3,Itpkb,Klf2,Klhl6,Klra17,Ksr1,Lgals9,Lta,Ltb,Ly9,Lyn,Mdc1,Mdm4,Myh9,Nfkbia,Nos2,Notch1,Pdgfb,Pik3r1,Pla2g4a,Plcg2,Prex1,Prkcq,Psap,Rgs1,Runx3,Serpinb2,Sin3b,Slamf1,S…	NA	2010002N04Rik,AI848100,Aim2,Ankrd11,Arid3a,Bbc3,Cbfa2t3,Ccr1,Ccr2,Ccr3,Ccr5,Cd47,Chst3,Csf2rb,Csf2rb2,Dapp1,E2f2,Fasl,Gata1,Ggta1,Id3,Ifngr2,Il2rb,Klf13,Ksr1,Lbr,Lgals9,Lgmn,Lyl1,Mpo,Mtf1,Mxd1,Naglu,Nfe2,Nos2,Pim2,Psap,Ptpn22,Ptprj,Rabgef1,Rap1a,Rfx5,Runx1,Runx3,Sh2d2a,Spna1,St3gal1,Sucnr1,Suv420h2,Tac4,Thoc5,Tmprss6,Tnfrsf13c,Tspan32,Xrcc6,Zfpm1	AI848100,Abcg1,Abhd5,Ace,Ada,Adrb2,Aff1,Aim2,Akt1,Ank,Ankrd11,Aplf,Apoa1,Apoa4,Apoc3,Apoe,Ar,Arhgap15,Arhgdib,Arhgef12,Arhgef6,Arid4a,Arid4b,Arntl,Arsa,Atm,Axl,B2m,B3gnt2,B4galt1,B9d2,BC096441,Bak1,Batf3,Bax,Bcl10,Bcl2l11,Bik,Birc2,Birc3,Birc5,Bmpr1a,C3ar1,Casp3,Cbfa2t3,Cbl,Ccna2,Ccnd2,Ccne1,Ccr1,Ccr10,Ccr2,Ccr3,Ccr5,Ccr7,Cd19,Cd226,Cd247,Cd24a,Cd274,Cd276,Cd40lg,Cd44,Cd47,Cd72,Cd9,Cd97,Cdkn1b,Cd…	NA
Mouse Phenotype	abnormal leukocyte physiology	0	0	0			0		0		5.71076e-222	0		AI848100,Abcc1,Abi1,Ada,Adam17,Adipoq,Adora2b,Adrb2,Aim2,Akt1,Akt3,Aoc3,Apoe,Appl1,Arhgdia,Arhgdib,Arhgef1,Arid3a,Arrb2,Atf3,Axl,B2m,B4galt1,BC096441,Bag4,Bak1,Batf,Batf3,Bax,Bcl10,Bcl3,Bik,Birc2,Birc3,Birc5,Bloc1s3,Braf,Brca2,Bst1,Camk2g,Card9,Casp3,Casp9,Ccl1,Ccl11,Ccl2,Ccl5,Ccr1,Ccr10,Ccr2,Ccr3,Ccr4,Ccr5,Ccr7,Cd19,Cd22,Cd244,Cd247,Cd28,Cd38,Cd3e,Cd3g,Cd44,Cd48,Cd69,Cd72,Cd74,Cd79a,Cd80,Cd81,Cd…	Abcc1,Abcg1,Abi1,Akt1,Apobec3,Arhgdia,Atf3,Batf3,Bbc3,Bcl6b,Birc2,Birc3,Birc5,Card9,Cd244,Cd47,Cd48,Cd84,Chrm1,Cnn2,Csf1,Csf3,Ctsl,Espn,Ets1,Fcgr1,Fgr,Fli1,Fos,Gm885,Gna12,Grk6,H2-D1,H2afx,Hps1,Hsh2d,Hsp90b1,Igj,Ikzf1,Inpp5d,Klf2,Lta,Ltb,Ly9,Map3k3,Me2,Mll5,Mmp28,Mt1,Mt2,Myo9b,Nfe2l2,Nlrp6,Notch2,Orai1,P2ry6,Pecam1,Pfn1,Pik3c2a,Ppia,Ppp2r3c,Prkcq,Psen1,Pstpip2,Ptprj,Rasa4,Rfk,Rhoh,Rpl22,Runx1,Rxr…	AI848100,Abca1,Abcc1,Abi1,Ada,Adora3,Adrb2,Alox5,Aoc3,Aplf,Apobec3,Arhgap15,Arhgef12,Arhgef6,Arid3a,Arntl,Axl,B2m,B3gnt2,B4galt1,BC096441,Bag4,Bank1,Bbs4,Bcl10,Bik,Birc2,Birc3,Blk,Bst1,C3,Camk2d,Camk2g,Card9,Casp3,Cbl,Ccr1,Ccr10,Ccr2,Ccr3,Ccr5,Ccr7,Ccrl2,Cd19,Cd247,Cd274,Cd276,Cd38,Cd40lg,Cd44,Cd47,Cd80,Cd81,Cdkn1b,Cebpb,Chi3l1,Chrm1,Clcn3,Clec4e,Cnpy3,Cnr2,Cops6,Crlf2,Cry2,Csf2rb,Csf2rb2,Ctla4,C…	NA	NA	Adora2b,Adora3,Ahr,Akt1,Apobec3,Arrb2,Atf3,B3gnt2,Bank1,Batf3,Bcl11b,Birc5,C3,Cacnb4,Card11,Casp3,Casp9,Cbfb,Cbl,Ccr4,Ccrl2,Cd14,Cd3e,Cd3g,Cd83,Cd9,Ceacam1,Cebpb,Chat,Chd4,Clec4e,Cnr2,Csf1,Csf2rb,Csf2rb2,Csf3,Csf3r,Ctss,Cxcl16,Cxcr2,Cyba,Cyp11a1,Def6,Dicer1,Dkk3,Dock3,Dok3,Drosha,Dtx1,Dusp10,E2f2,Ebf1,Edil3,Esr2,Ets1,Fli1,Fyb,Fyn,Gcnt3,Gfi1,Ggta1,Gimap1,Gimap4,Gimap5,Gja1,Glb1,Gm885,Gna13,Gpr183,…	NA	Adcy9,Akt1,Alox5ap,B3gnt2,Bach2,Ccl5,Cd244,Cd276,Cd48,Cd69,Cd84,Cebpb,Clec7a,Cnn2,Cnr2,Csf3r,Ctsc,Dusp2,Dusp4,E2f2,Ets1,Fads2,Fli1,Flot1,Flt1,Flt3,Fyb,Ggta1,Gimap1,Gimap4,Gimap5,H2-D1,Hsh2d,Icam2,Id3,Ier3,Ikzf1,Il12a,Il21r,Il4ra,Il6ra,Irf2,Itgb3,Itpkb,Klf2,Klra10,Klre1,Ksr1,Lta,Ltb,Ly9,Lyn,Mbtps1,Mdc1,Mdm4,Mrc1,Myh9,Ncf1,Nfkbia,Nos2,Notch1,Panx1,Pik3r1,Pla2g4a,Plcg2,Prex1,Prkcq,Psap,Rab27a,Rgs1,R…	NA	AI848100,Adora3,Aim2,Arid3a,Bbc3,Blm,Ccr1,Ccr2,Ccr3,Ccr5,Cd47,Cnr2,Csf2rb,Csf2rb2,Dapp1,E2f2,Fasl,Ggta1,Hdac6,Id3,Ifngr2,Il2rb,Klf13,Ksr1,Lgmn,Mcph1,Mpo,Mxd1,Ncf4,Nos2,Padi4,Pdlim2,Pim2,Psap,Ptpn22,Ptprj,Rabgef1,Rap1a,Rfk,Rfx5,Runx1,Runx3,Sema4b,Sh2d2a,Spna1,Sucnr1,Suv420h2,Tnfrsf13c,Tspan32,Xrcc6	AI848100,Abca1,Abcc1,Abcg1,Acp5,Ada,Adcy9,Adora3,Adrb2,Aim2,Akt1,Alox5,Aoc3,Aplf,Apoe,Arhgap15,Arhgdib,Arhgef12,Arhgef6,Arntl,Atf3,Atm,Axl,B2m,B3gnt2,B4galt1,BC096441,Bak1,Batf3,Bax,Bcl10,Bcl2l11,Bik,Birc2,Birc3,Birc5,Blm,Bmpr1a,C3ar1,C5ar1,Cabin1,Camk2g,Casp1,Casp3,Casp7,Casp9,Cbl,Ccr1,Ccr10,Ccr2,Ccr3,Ccr5,Ccr7,Ccrl2,Cd19,Cd226,Cd247,Cd274,Cd276,Cd40lg,Cd44,Cd47,Cd72,Cd9,Cdkn1b,Cebpb,Cebpe,Chd4,…	NA
Mouse Phenotype	abnormal leukopoiesis	0		0					5.13107e-276		2.1351e-162	0		Abi1,Ada,Adam10,Aff1,Akt1,Akt3,Apc,Apoe,Appl1,Arhgdia,Arhgdib,Arhgef1,Arid3a,Axl,B2m,B9d2,BC096441,Bak1,Batf,Bax,Bcl10,Bcl11a,Bcl3,Bik,Birc3,Birc5,Braf,Bst1,Carm1,Casp3,Cbfa2t3,Ccl5,Ccnd1,Ccnd2,Ccr2,Ccr5,Ccr7,Cd19,Cd22,Cd247,Cd24a,Cd28,Cd3d,Cd3e,Cd3g,Cd48,Cd5l,Cd69,Cd72,Cd74,Cd79a,Cd80,Cd81,Cd83,Cdkn1b,Cdkn2a,Cdkn2b,Cebpa,Cebpe,Cflar,Chuk,Cks1b,Clec4n,Col10a1,Cops5,Cpa3,Crip3,Cry2,Csf1r,Csf3r,Ctc…	NA	Abi1,Ada,Adam10,Aff1,Aplf,Arhgef12,Arhgef6,Arid3a,Arid4b,Arntl,Asxl1,Axl,B2m,B3gnt2,B9d2,BC096441,Bank1,Bcl10,Bcl11a,Bik,Birc3,Blk,Bst1,C3,Casp3,Cbfa2t3,Cbl,Ccnd2,Ccr2,Ccr5,Ccr7,Cd19,Cd247,Cd24a,Cd276,Cd40lg,Cd80,Cd81,Cdkn1b,Clec4n,Col10a1,Cpa3,Crlf2,Cry2,Csf2rb,Csf2rb2,Ctcf,Ctla4,Ctsd,Ctsg,Dapp1,Dck,Dffb,Diap1,Dkc1,Dll4,Drosha,Dtx1,E2f1,E2f2,Ebi3,Erg,Ern1,Esr2,Ewsr1,Fasl,Fbxo30,Flt3,Foxo3,Foxp3,…	NA	NA	NA	NA	Akt1,B3gnt2,Bach2,Bcl11a,Ccl5,Cd276,Cd48,Cd69,Cdkn2a,Cdkn2b,Csf3r,E2f2,Elk4,Ern1,Ets1,Fli1,Flt3,Fyb,Ggta1,Gimap1,Gimap5,H2-D1,Hivep3,Hmga1,Hsh2d,Id3,Ikzf1,Il21r,Il4ra,Irf2,Itpkb,Klf2,Klhl6,Ksr1,Lta,Ltb,Ly9,Lyn,Mdc1,Nfkbia,Nos2,Notch1,Pik3r1,Pla2g4a,Plcg2,Prkcq,Runx3,Sin3b,Slamf1,Slc46a2,Socs1,Sp3,Stat1,Stat4,Sucnr1,Tec,Tnf,Txnip,Ubash3a,Zc3h12a	NA	Arid3a,Bbc3,Cbfa2t3,Ccr2,Ccr5,Csf2rb,Csf2rb2,Dapp1,E2f2,Fasl,Gata1,Ggta1,Id3,Ifngr2,Il2rb,Klf13,Ksr1,Lbr,Lyl1,Nos2,Pim2,Ptpn22,Ptprj,Rap1a,Runx1,Runx3,Sh2d2a,Spna1,Sucnr1,Suv420h2,Tac4,Thoc5,Tnfrsf13c,Tspan32,Xrcc6	Abcg1,Ada,Aff1,Akt1,Aplf,Apoe,Ar,Arhgdib,Arhgef12,Arhgef6,Arid4a,Arid4b,Arntl,Atm,Axl,B2m,B3gnt2,B9d2,BC096441,Bak1,Bax,Bcl10,Bcl2l11,Bik,Birc3,Birc5,C3ar1,Casp3,Cbfa2t3,Cbl,Ccnd2,Ccr2,Ccr5,Ccr7,Cd19,Cd226,Cd247,Cd24a,Cd276,Cd40lg,Cd72,Cdkn1b,Cebpe,Cflar,Chd4,Chek2,Cks1b,Clec4n,Cpa3,Cry2,Csf2rb,Csf2rb2,Csf3,Csf3r,Csk,Ctcf,Ctsd,Ctse,Ctsg,Dapp1,Def6,Diap1,Dicer1,Dkc1,Dll4,Dok1,Drosha,Dtx1,E2f2,E2f4…	NA
Mouse Phenotype	abnormal lymph node morphology	0		0					4.10782e-117			0		Angptl4,Apc,Apoe,Arhgdia,Arhgdib,Axl,B2m,BC096441,Bak1,Bax,Bcl3,Birc2,Birc3,Birc5,C4b,Ccl25,Ccr2,Ccr7,Cd19,Cd247,Cd3g,Cd74,Cd80,Cdkn2a,Cdkn2b,Cebpb,Cebpe,Cflar,Chd2,Col10a1,Cr1l,Csf1,Ctnnb1,Cxcr2,Cyp27b1,Cytip,Dck,Def6,Diap1,Dock2,Dok2,Eef1a2,Efnb2,Elavl1,F2r,Fadd,Fasl,Fcgr2b,Flt3,Flt3l,Foxn1,Foxo1,Fut4,Fut7,Gimap5,Gna13,Gpr132,H2-Aa,H2-Ab1,H2-T3,Ifnar1,Ifngr1,Ikzf1,Il10rb,Il17f,Il21r,Il2ra,Il5ra…	NA	Axl,B2m,BC096441,Birc2,Birc3,C3,C4b,Cbl,Ccr2,Ccr7,Ccrl2,Cd19,Cd247,Cd40lg,Cd80,Cebpb,Col10a1,Cr1l,Csf2rb,Csf2rb2,Ctla4,Ctnnb1,Dck,Diap1,Drosha,Esr2,F2r,Fasl,Fcgr2b,Flt3,Foxo3,Foxp3,Fyn,Icos,Ifnar1,Ikzf1,Il10rb,Il21r,Il2rb,Il2rg,Il4,Inpp5d,Irf2,Itgav,Itgb2,Klhl6,Lat,Lat2,Lbr,Lcp2,Map3k14,Mdm2,Mll5,Msmb,Myc,Myh9,Nfatc3,Nfkb1,Nos2,Otc,Pdcd1lg2,Ppp3r1,Psen2,Pstpip2,Ptger1,Ptpn6,Rag1,Runx1,Runx3,Rxra,…	NA	NA	NA	NA	Cdkn2a,Cdkn2b,Cebpb,F2r,Flt3,Gimap5,Ikzf1,Il21r,Irf2,Klhl6,Lta,Ltb,Lyn,Mdm4,Myh9,Nos2,Plcg2,Runx3,Socs1,Tec,Tnf,Tom1l2,Txnip,Zc3h12a,Zfp36l1,Zfp36l2	NA	NA	Angptl4,Apoe,Arhgdib,Atm,Axl,B2m,BC096441,Bak1,Bax,Bcl2l11,Birc2,Birc3,Birc5,Cbl,Ccr2,Ccr7,Ccrl2,Cd19,Cd247,Cd40lg,Cebpb,Cebpe,Cflar,Chd2,Chd4,Csf1,Csf2rb,Csf2rb2,Ctsl,Def6,Diap1,Dicer1,Dok1,Drosha,Esr2,F2r,Fadd,Fasl,Fcgr2b,Flt3,Flt3l,Foxn1,Foxo3,Fut7,Gna13,H2-Aa,H2-Ab1,H2-T3,Hr,Ifnar1,Ikzf1,Il10rb,Il21r,Il2rb,Il4,Il7r,Inpp5d,Irf2,Irf8,Itga6,Itgb2,Klhl6,Klhl7,Lat,Lcp2,Ltbr,Mdm4,Msmb,Myc,Myh9,Nfat…	NA
Mouse Phenotype	abnormal lymph node size	0		0								0		Apoe,Axl,B2m,BC096441,Bak1,Bax,Bcl3,Birc2,Birc3,Birc5,Ccr2,Ccr7,Cd19,Cd247,Cd3g,Cdkn2a,Cdkn2b,Cebpb,Cebpe,Chd2,Cr1l,Cxcr2,Cyp27b1,Cytip,Def6,Dock2,Dok2,Eef1a2,Elavl1,Fadd,Fasl,Fcgr2b,Flt3,Flt3l,Foxn1,Foxo1,Fut4,Fut7,Gimap5,Gna13,H2-Aa,Ifnar1,Ifngr1,Ikzf1,Il2ra,Il5ra,Il6st,Inpp5d,Irf2,Irf8,Itch,Lat,Lat2,Lbr,Lyn,Mdm4,Mgat2,Mll5,Msmb,Nfe2l2,Nr4a1,Pdcd1lg2,Prkcd,Psen1,Pten,Ptpn6,Rassf5,Rc3h1,Runx1,Rx…	NA	Axl,B2m,BC096441,Birc2,Birc3,Cbl,Ccr2,Ccr7,Ccrl2,Cd19,Cd247,Cd40lg,Cebpb,Cr1l,Csf2rb,Csf2rb2,Ctla4,Drosha,Esr2,Fasl,Fcgr2b,Flt3,Foxo3,Foxp3,Fyn,Icos,Ifnar1,Ikzf1,Il2rb,Il2rg,Il4,Inpp5d,Irf2,Itgb2,Lat,Lat2,Lbr,Lcp2,Mdm2,Mll5,Msmb,Myc,Nfatc3,Nfkb1,Otc,Pdcd1lg2,Psen2,Ptpn6,Runx1,Rxra,Slc35c1,Stat5b,Stim1,Stim2,Tec,Tgfb1,Xrcc6,Zfp36l1	NA	NA	NA	NA	NA	NA	NA	Apoe,Atm,Axl,B2m,BC096441,Bak1,Bax,Bcl2l11,Birc2,Birc3,Birc5,Cbl,Ccr2,Ccr7,Ccrl2,Cd19,Cd247,Cd40lg,Cebpb,Cebpe,Chd2,Chd4,Csf2rb,Csf2rb2,Ctsl,Def6,Dicer1,Dok1,Drosha,Esr2,Fadd,Fasl,Fcgr2b,Flt3,Flt3l,Foxn1,Foxo3,Fut7,Gna13,H2-Aa,Ifnar1,Ikzf1,Il2rb,Il4,Il7r,Inpp5d,Irf2,Irf8,Itgb2,Lat,Lcp2,Mdm4,Msmb,Myc,Nfatc3,Nfe2l2,Nfkb1,Nkx3-1,Pdcd1lg2,Plcg2,Prkcd,Psen1,Psen2,Ptpn6,Runx1,Rxra,Sit1,Slc35c1,Smad3,So…	NA
Mouse Phenotype	abnormal lymphocyte cell number	0		0					1.18843e-261			0		Ace,Ada,Adam10,Adam17,Aff1,Aim2,Akt1,Akt3,Apc,Apoe,Arhgdia,Arhgdib,Arhgef1,Arid3a,Axl,B2m,B4galt1,B9d2,BC096441,Bak1,Batf,Batf3,Bax,Bcl10,Bcl11a,Bcl3,Bik,Birc2,Birc3,Birc5,Braf,Brca2,Bst1,Casp3,Cbfa2t3,Ccl2,Ccl25,Ccl5,Ccnd1,Ccr10,Ccr2,Ccr4,Ccr5,Ccr7,Cd19,Cd22,Cd247,Cd24a,Cd28,Cd3d,Cd3e,Cd3g,Cd48,Cd5l,Cd69,Cd72,Cd74,Cd79a,Cd80,Cd81,Cd83,Cd84,Cdkn1b,Cdkn2a,Cdkn2b,Cebpe,Cflar,Chd2,Chst3,Chuk,Cks1b,C…	NA	Ace,Ada,Adam10,Aff1,Arhgap15,Arhgef6,Arid3a,Arid4b,Arntl,Asxl1,Axl,B2m,B4galt1,B9d2,BC096441,Bank1,Bcl10,Bcl11a,Bik,Birc2,Birc3,Blk,Bnip3l,Bst1,Casp3,Cbfa2t3,Cbl,Ccr10,Ccr2,Ccr5,Ccr7,Cd19,Cd247,Cd24a,Cd274,Cd40lg,Cd47,Cd80,Cd81,Cdkn1b,Chi3l1,Chst3,Clec4e,Col10a1,Cpa3,Cr1l,Crlf2,Ctcf,Ctla4,Ctsd,Dapp1,Dck,Dffb,Diap1,Dkc1,Dll4,Drosha,Dtx1,E2f1,E2f2,Ebi3,Egr1,Erg,Esr2,Ewsr1,Fasl,Fbxo30,Flt3,Foxo3,Fox…	NA	NA	NA	NA	Akt1,Bach2,Bcl11a,Ccl5,Cd48,Cd69,Cd84,Cdkn2a,Cdkn2b,Chst3,Dock8,E2f2,Elk4,Ets1,Fli1,Flt3,Fyb,Ggta1,Gimap1,Gimap5,Gsx1,H2-D1,Hivep3,Id3,Ier3,Ikzf1,Il21r,Il4ra,Irf2,Itpkb,Klf2,Klhl6,Lgals9,Lta,Ltb,Lyn,Myh9,Nfkbia,Nos2,Notch1,Pik3r1,Plcg2,Prkcq,Rgs1,Runx3,Serpinb2,Slc46a2,Socs1,Sp3,Stat1,Tec,Tlr7,Tlr8,Tnf,Tom1l2,Txnip,Ubash3a,Vsig4,Zc3h12a	NA	NA	Abcg1,Ace,Ada,Aff1,Aim2,Akt1,Apoe,Ar,Arhgap15,Arhgdib,Arhgef6,Arid4a,Arid4b,Arntl,Atm,Axl,B2m,B4galt1,B9d2,BC096441,Bak1,Batf3,Bax,Bcl10,Bcl2l11,Bik,Birc2,Birc3,Birc5,C3ar1,Casp3,Cbfa2t3,Cbl,Ccr10,Ccr2,Ccr5,Ccr7,Cd19,Cd247,Cd24a,Cd274,Cd40lg,Cd47,Cd72,Cdkn1b,Cds2,Cebpe,Cflar,Chd2,Chd4,Chek2,Chst3,Cks1b,Clec4e,Cpa3,Csk,Ctcf,Ctsd,Ctse,Ctsl,Ctss,Cx3cr1,Dapp1,Def6,Diap1,Dicer1,Dkc1,Dll4,Drosha,Dtx1,E…	NA
Mouse Phenotype	abnormal lymphocyte morphology	0		0					5.10443199998052e-313		1.17941e-196	0		Abi1,Ace,Ada,Adam10,Adam17,Aff1,Aim2,Akt1,Akt3,Amhr2,Apc,Apoe,Appl1,Arhgdia,Arhgdib,Arhgef1,Arid3a,Axl,B2m,B4galt1,B9d2,BC096441,Bak1,Batf,Batf3,Bax,Bcl10,Bcl11a,Bcl3,Bik,Birc2,Birc3,Birc5,Braf,Brca2,Bst1,Carm1,Casp3,Cbfa2t3,Ccl2,Ccl25,Ccl5,Ccnd1,Ccnd2,Ccr10,Ccr2,Ccr4,Ccr5,Ccr7,Cd19,Cd22,Cd247,Cd24a,Cd28,Cd3d,Cd3e,Cd3g,Cd44,Cd48,Cd5l,Cd69,Cd72,Cd74,Cd79a,Cd80,Cd81,Cd83,Cd84,Cdkn1b,Cdkn2a,Cdkn2b,C…	NA	Abi1,Ace,Ada,Adam10,Aff1,Amhr2,Aplf,Arhgap15,Arhgef12,Arhgef6,Arid3a,Arid4b,Arntl,Asxl1,Axl,B2m,B3gnt2,B4galt1,B9d2,BC096441,Bank1,Bcl10,Bcl11a,Bik,Birc2,Birc3,Blk,Bnip3l,Bst1,Btrc,C3,Casp3,Cbfa2t3,Cbl,Ccnd2,Ccr10,Ccr2,Ccr5,Ccr7,Cd19,Cd247,Cd24a,Cd274,Cd276,Cd40lg,Cd44,Cd47,Cd80,Cd81,Cdkn1b,Cebpb,Chi3l1,Chst3,Clec4e,Clec4n,Col10a1,Comt,Cpa3,Cr1l,Crlf2,Cry2,Csf2rb,Csf2rb2,Ctcf,Ctla4,Ctsd,Dapp1,Dck…	NA	NA	NA	NA	Akt1,B3gnt2,Bach2,Bcl11a,Ccl5,Cd276,Cd48,Cd69,Cd84,Cdkn2a,Cdkn2b,Cebpb,Chst3,Dock8,E2f2,Elk4,Ern1,Ets1,Fli1,Flt3,Fyb,Ggta1,Gimap1,Gimap5,Gsx1,H2-D1,Hivep3,Hsh2d,Id3,Ier3,Ikzf1,Il21r,Il4ra,Irf2,Itpkb,Klf2,Klhl6,Ksr1,Lgals9,Lta,Ltb,Ly9,Lyn,Mdc1,Myh9,Nfkbia,Nos2,Notch1,Pik3r1,Plcg2,Prkcq,Rgs1,Runx3,Serpinb2,Slamf1,Slc46a2,Socs1,Sp3,Stat1,Stat4,Sucnr1,Tec,Tlr7,Tlr8,Tnf,Tom1l2,Txnip,Ubash3a,Vsig4,Zc3h…	NA	Aim2,Arid3a,Bbc3,Cbfa2t3,Ccr2,Ccr5,Cd47,Chst3,Csf2rb,Csf2rb2,Dapp1,E2f2,Fasl,Gata1,Ggta1,Id3,Ifngr2,Il2rb,Klf13,Ksr1,Lbr,Lgals9,Lgmn,Lyl1,Mtf1,Nos2,Pim2,Ptpn22,Ptprj,Rap1a,Rfx5,Runx1,Runx3,Sh2d2a,Spna1,St3gal1,Sucnr1,Suv420h2,Tac4,Thoc5,Tnfrsf13c,Tspan32,Xrcc6	Abcg1,Ace,Ada,Aff1,Aim2,Akt1,Aplf,Apoe,Ar,Arhgap15,Arhgdib,Arhgef12,Arhgef6,Arid4a,Arid4b,Arntl,Atm,Axl,B2m,B3gnt2,B4galt1,B9d2,BC096441,Bak1,Batf3,Bax,Bcl10,Bcl2l11,Bik,Birc2,Birc3,Birc5,C3ar1,Casp3,Cbfa2t3,Cbl,Ccnd2,Ccr10,Ccr2,Ccr5,Ccr7,Cd19,Cd226,Cd247,Cd24a,Cd274,Cd276,Cd40lg,Cd44,Cd47,Cd72,Cdkn1b,Cds2,Cebpb,Cebpe,Cflar,Chd2,Chd4,Chek2,Chst3,Cks1b,Clec4e,Clec4n,Comt,Cpa3,Cry2,Csf2rb,Csf2rb2,C…	NA
Mouse Phenotype	abnormal lymphocyte physiology	0		0					0		4.64305e-171	0		Abi1,Ada,Akt1,Akt3,Apoe,Appl1,Arhgdia,Arhgdib,Arhgef1,Arid3a,Arrb2,Atf3,Axl,B2m,BC096441,Bak1,Batf,Batf3,Bax,Bcl10,Bcl3,Bik,Birc2,Birc3,Birc5,Bloc1s3,Braf,Brca2,Bst1,Casp3,Casp9,Ccl1,Ccl2,Ccl5,Ccr10,Ccr2,Ccr4,Ccr5,Ccr7,Cd19,Cd22,Cd244,Cd247,Cd28,Cd38,Cd3e,Cd3g,Cd44,Cd48,Cd69,Cd72,Cd74,Cd79a,Cd80,Cd81,Cd83,Cd84,Cdkn1b,Cebpb,Chrm1,Chuk,Cks1b,Cnpy3,Cops5,Cry2,Ctsc,Cx3cr1,Cxcr2,Cxcr4,Cyp11a1,Dapp1,Db…	NA	Abi1,Ada,Aplf,Apobec3,Arhgef12,Arhgef6,Arid3a,Arntl,Axl,B2m,B3gnt2,BC096441,Bank1,Bbs4,Bcl10,Bik,Birc2,Birc3,Blk,Bst1,C3,Casp3,Cbl,Ccr10,Ccr2,Ccr5,Ccr7,Ccrl2,Cd19,Cd247,Cd274,Cd276,Cd38,Cd40lg,Cd44,Cd80,Cd81,Cdkn1b,Cebpb,Chi3l1,Chrm1,Cnpy3,Cops6,Crlf2,Cry2,Csf2rb,Csf2rb2,Ctla4,Ctsc,Cxcl9,Dapp1,Diap1,Drosha,Dtx1,E2f1,E2f2,Ebag9,Ecm1,Esr2,F2rl1,Fasl,Fbxo30,Fcgr2b,Fcrla,Fcrlb,Fkbp11,Flt3,Foxo3,Foxp3…	NA	NA	NA	NA	Adcy9,Akt1,B3gnt2,Bach2,Ccl5,Cd244,Cd276,Cd48,Cd69,Cd84,Cebpb,Ctsc,Dusp4,E2f2,Ets1,Fli1,Flt3,Fyb,Ggta1,Gimap1,Gimap4,Gimap5,H2-D1,Hsh2d,Id3,Ier3,Ikzf1,Il12a,Il21r,Il4ra,Il6ra,Irf2,Itgb3,Itpkb,Klf2,Klra10,Klre1,Ksr1,Lta,Ltb,Ly9,Lyn,Mbtps1,Mdc1,Mdm4,Myh9,Nfkbia,Nos2,Notch1,Panx1,Pik3r1,Plcg2,Prkcq,Rab27a,Rgs1,Runx3,Sema4b,Slamf1,Slamf6,Slamf7,Slc46a2,Socs1,Stat1,Stat4,Sucnr1,Tec,Tlr7,Tlr8,Tnf,Txnip…	NA	Arid3a,Bbc3,Blm,Ccr2,Ccr5,Csf2rb,Csf2rb2,Dapp1,E2f2,Fasl,Ggta1,Hdac6,Id3,Ifngr2,Il2rb,Klf13,Ksr1,Lgmn,Mcph1,Mxd1,Nos2,Pdlim2,Pim2,Ptpn22,Ptprj,Rabgef1,Rap1a,Rfx5,Runx1,Runx3,Sema4b,Sh2d2a,Spna1,Sucnr1,Suv420h2,Tnfrsf13c,Tspan32,Xrcc6	Ada,Adcy9,Akt1,Aplf,Apoe,Arhgdib,Arhgef12,Arhgef6,Arntl,Atf3,Atm,Axl,B2m,B3gnt2,BC096441,Bak1,Batf3,Bax,Bcl10,Bcl2l11,Bik,Birc2,Birc3,Birc5,Blm,C3ar1,Cabin1,Casp1,Casp3,Casp7,Casp9,Cbl,Ccr10,Ccr2,Ccr5,Ccr7,Ccrl2,Cd19,Cd226,Cd247,Cd274,Cd276,Cd40lg,Cd44,Cd72,Cdkn1b,Cebpb,Chd4,Chrm1,Cks1b,Cnpy3,Cry2,Csf2rb,Csf2rb2,Ctse,Ctss,Cx3cr1,Dapp1,Def6,Diap1,Dicer1,Dok1,Drosha,Dtx1,E2f2,Ebag9,Ecm1,Elf1,Ercc1,…	NA
Mouse Phenotype	abnormal lymphopoiesis	0		0					1.19935e-249		3.07939e-154	0		Abi1,Ada,Adam10,Aff1,Akt1,Akt3,Apc,Apoe,Appl1,Arhgdia,Arhgdib,Arhgef1,Arid3a,Axl,B2m,B9d2,BC096441,Bak1,Batf,Bax,Bcl10,Bcl11a,Bcl3,Bik,Birc3,Birc5,Braf,Bst1,Carm1,Casp3,Cbfa2t3,Ccl5,Ccnd1,Ccnd2,Ccr2,Ccr5,Ccr7,Cd19,Cd22,Cd247,Cd24a,Cd28,Cd3d,Cd3e,Cd3g,Cd48,Cd5l,Cd69,Cd72,Cd74,Cd79a,Cd80,Cd81,Cd83,Cdkn1b,Cdkn2a,Chuk,Cks1b,Clec4n,Col10a1,Cops5,Cpa3,Crip3,Cry2,Ctcf,Cxcr4,Dapp1,Dbnl,Dck,Def6,Dffb,Diap…	NA	Abi1,Ada,Adam10,Aff1,Aplf,Arhgef12,Arhgef6,Arid3a,Arntl,Asxl1,Axl,B2m,B3gnt2,B9d2,BC096441,Bank1,Bcl10,Bcl11a,Bik,Birc3,Blk,Bst1,C3,Casp3,Cbfa2t3,Cbl,Ccnd2,Ccr2,Ccr5,Ccr7,Cd19,Cd247,Cd24a,Cd276,Cd40lg,Cd80,Cd81,Cdkn1b,Clec4n,Col10a1,Cpa3,Crlf2,Cry2,Csf2rb,Csf2rb2,Ctcf,Ctla4,Ctsd,Dapp1,Dck,Dffb,Diap1,Dkc1,Dll4,Drosha,Dtx1,E2f1,E2f2,Ebi3,Erg,Ern1,Esr2,Ewsr1,Fasl,Fbxo30,Flt3,Foxo3,Foxp3,Fyb,Fyn,Gadd…	NA	NA	NA	NA	Akt1,B3gnt2,Bach2,Bcl11a,Ccl5,Cd276,Cd48,Cd69,Cdkn2a,E2f2,Elk4,Ern1,Ets1,Fli1,Flt3,Fyb,Ggta1,Gimap1,Gimap5,H2-D1,Hivep3,Hsh2d,Id3,Ikzf1,Il21r,Il4ra,Irf2,Itpkb,Klf2,Klhl6,Ksr1,Lta,Ltb,Ly9,Lyn,Mdc1,Nfkbia,Nos2,Notch1,Pik3r1,Plcg2,Prkcq,Runx3,Slamf1,Slc46a2,Socs1,Sp3,Stat1,Stat4,Sucnr1,Tec,Tnf,Txnip,Ubash3a,Zc3h12a	NA	Arid3a,Bbc3,Cbfa2t3,Ccr2,Ccr5,Csf2rb,Csf2rb2,Dapp1,E2f2,Fasl,Ggta1,Id3,Ifngr2,Il2rb,Klf13,Ksr1,Lyl1,Nos2,Pim2,Ptpn22,Ptprj,Rap1a,Runx1,Runx3,Sh2d2a,Spna1,Sucnr1,Suv420h2,Tac4,Thoc5,Tnfrsf13c,Tspan32,Xrcc6	Ada,Aff1,Akt1,Aplf,Apoe,Ar,Arhgdib,Arhgef12,Arhgef6,Arntl,Atm,Axl,B2m,B3gnt2,B9d2,BC096441,Bak1,Bax,Bcl10,Bcl2l11,Bik,Birc3,Birc5,C3ar1,Casp3,Cbfa2t3,Cbl,Ccnd2,Ccr2,Ccr5,Ccr7,Cd19,Cd226,Cd247,Cd24a,Cd276,Cd40lg,Cd72,Cdkn1b,Chd4,Chek2,Cks1b,Clec4n,Cpa3,Cry2,Csf2rb,Csf2rb2,Csk,Ctcf,Ctsd,Ctse,Dapp1,Def6,Diap1,Dicer1,Dkc1,Dll4,Dok1,Drosha,Dtx1,E2f2,E2f4,Ebi3,Elf1,Ercc1,Erg,Ern1,Esr2,Ets1,Ewsr1,Fadd,F…	NA
Mouse Phenotype	abnormal lymph organ size	0	0	0						0		0		Ada,Adam10,Adam17,Aff1,Agpat2,Akt1,Akt3,Apc,Apoe,Arhgdia,Arhgdib,Arhgef1,Asb1,Axl,B2m,B4galt1,BC096441,Bag4,Bak1,Bax,Bcl11a,Bcl3,Bik,Bin3,Birc2,Birc3,Birc5,Braf,Brca2,C4b,Cacna1a,Capn10,Carm1,Cbfa2t3,Ccnd1,Ccr2,Ccr7,Cd19,Cd247,Cd3d,Cd3e,Cd3g,Cdkn1b,Cdkn2a,Cdkn2b,Cebpa,Cebpb,Cebpe,Cfc1,Cflar,Chd2,Cks1b,Clk1,Col10a1,Cpa3,Cr1l,Crip3,Csf1r,Ctcf,Ctsa,Cxcr2,Cyp27b1,Cytip,Dad1,Dbnl,Dck,Def6,Dffb,Diap1,D…	Add2,Akt1,Arhgdia,Birc2,Birc3,Birc5,Cacna1a,Cd47,Ctsl,Dnase1,Egln3,Eif2c2,Ets1,Fli1,Fos,Gna12,Hist1h1c,Hist1h1d,Hist1h1e,Hmox1,Hsh2d,Ikzf1,Inpp5d,Lmna,Lta,Ltb,Map3k3,Mcm2,Me2,Mll5,Msi2,Mt1,Mt2,Ncor1,Nfe2l2,Notch2,Nr4a1,Pik3c2a,Ppia,Ppp2r3c,Prkcq,Prss16,Psen1,Pstpip2,Rhoh,Rpl22,Runx1,Rxra,Sfpi1,Sgsh,Sharpin,Slc11a1,Slc19a1,Slc22a6,Slc37a4,Src,Tcf3,Tgfbr2,Tk1,Tlr9,Tnf,Tns3,Unc13d,Wipf1,Zfp36,Zfp36l…	Abca1,Abcc4,Ada,Adam10,Add2,Aff1,Agpat2,Alox5,Arid4b,Arntl,Asxl1,Axl,B2m,B4galt1,BC096441,Bag4,Bcl11a,Bik,Birc2,Birc3,Blk,Bnip3l,C3,C4b,Cacna2d2,Cbfa2t3,Cbl,Ccr2,Ccr7,Ccrl2,Cd19,Cd247,Cd40lg,Cd47,Cdkn1b,Cebpb,Cfc1,Cideb,Cited2,Col10a1,Cpa3,Cr1l,Crlf2,Csf2rb,Csf2rb2,Ctcf,Ctla4,Ctsd,Ctsg,Dad1,Dck,Dffb,Diap1,Dkc1,Dll4,Dnase1,Drosha,Dtx1,E2f1,E2f2,Egr1,Eif2c2,Epb4.2,Epor,Esr2,Ewsr1,Exoc6,Fads2,Fasl,F…	NA	NA	NA	NA	NA	Add2,B2m,B4galt1,Bcl11a,Bik,Birc2,Birc3,Cacna2d2,Carm1,Cbfa2t3,Cd47,Csf2rb,Csf2rb2,Cul4a,Dnase2a,Egr1,Eif2c2,Epb4.2,Fads2,Fbxo30,Fech,Fen1,Fntb,Foxo3,Gadd45a,Gata1,Hbb-b1,Hist1h1c,Hist1h1d,Hist1h1e,Hk1,Hr,Icam1,Ifnar1,Ikzf1,Il10rb,Il2rb,Jak1,Kcnn4,Klf1,Klf13,Lat2,Mafk,Mdc1,Mdm2,Msmb,Mxi1,Myc,Nhej1,Nkx3-1,Pcid2,Pfdn1,Phc1,Pklr,Pnp,Ppm1d,Ppp2r3c,Prkaa1,Prkcd,Rhoh,Rxra,Sac3d1,Sipa1,Slc19a1,Slc20a1,S…	NA	Abca1,Abcc4,Ada,Add2,Aff1,Agpat2,Akt1,Alox5,Apoe,Ar,Arhgap1,Arhgdib,Arid4a,Arid4b,Arntl,Asb1,Atm,Axl,B2m,B4galt1,BC096441,Bak1,Bax,Bcl2l11,Bik,Birc2,Birc3,Birc5,Cacna1a,Cacna2d2,Cbfa2t3,Cbl,Ccne1,Ccr2,Ccr7,Ccrl2,Cd19,Cd247,Cd40lg,Cd47,Cdc73,Cdkn1b,Cebpb,Cebpe,Cflar,Chd2,Chd4,Cideb,Cited2,Cks1b,Cpa3,Csf2rb,Csf2rb2,Csk,Ctcf,Ctsd,Ctsg,Ctsl,Cyp1a2,Dad1,Def6,Diap1,Dicer1,Dkc1,Dll4,Dok1,Drosha,Dtx1,E2f…	NA
Mouse Phenotype	abnormal macrophage physiology	0							6.68379e-126			0		AI848100,Adam17,Adora2b,Adrb2,Aim2,Apoe,Axl,B4galt1,Bag4,Bcl3,Birc3,Camk2g,Card9,Casp3,Ccl2,Ccr2,Ccr5,Cd44,Cd81,Cebpb,Chuk,Clec4e,Clec7a,Cnpy3,Cnr2,Cry2,Csf1,Ctnnb1,Cx3cr1,Cxcl16,Cxcr3,Ddit3,Dok2,Dusp2,Dusp4,Egr1,Ero1l,F3,Farp2,Fasl,Fcer1g,Fcer2a,Fcgr1,Fcgr2b,Fcgr3,Fgr,Flt3,Fos,Fosl2,Glb1,Gpr132,Gpr55,H2-Aa,H2-Ab1,Hcst,Hif1a,Icam1,Idua,Ier3,Ifnar1,Ifngr1,Igf1r,Il12rb2,Il4ra,Il6,Il6st,Inpp5d,Irak2…	NA	NA	NA	NA	NA	NA	B3gnt2,Cebpb,Clec7a,Cnn2,Cnr2,Dusp2,Dusp4,Fads2,Flt1,Flt3,Ier3,Il4ra,Itgb3,Lta,Lyn,Mrc1,Ncf1,Nfkbia,Nos2,Pla2g4a,Psap,Slamf1,Socs1,Sqstm1,Stat1,Tlr7,Tnf	NA	NA	AI848100,Abca1,Abcg1,Acp5,Adrb2,Aim2,Apoe,Atm,Axl,B3gnt2,B4galt1,Birc3,Bmpr1a,Camk2g,Casp1,Casp3,Ccr2,Ccr5,Cd44,Cd9,Cebpb,Clcn3,Clcn7,Clec4e,Cnpy3,Cnr2,Cry2,Csf1,Ctsl,Cx3cl1,Cx3cr1,Ddit3,Dock3,Dok1,Dok3,Egr1,Ero1l,Fads2,Farp2,Fasl,Fcgr1,Fcgr2b,Fcgr3,Fgr,Flt1,Flt3,H2-Aa,H2-Ab1,Hp,Ier3,Ifnar1,Ifnar2,Igf1r,Il12rb2,Il1b,Il4ra,Il6,Inpp5d,Irak2,Irak3,Itga4,Itgb3,Lep,Lgmn,Lif,Lrp1,Ltb4r1,Mapkapk2,Marcks…	NA
Mouse Phenotype	abnormal marginal zone B cell morphology	0												Adam10,Apoe,Arhgdia,Arhgdib,Arhgef1,Arid3a,Bak1,Bax,Bcl10,Birc2,Birc3,Cd19,Cd22,Cd72,Cd79a,Chuk,Cxcr7,Dll1,Dock2,Dock8,Dtx1,Fli1,Foxo1,Gimap1,Git2,Gna13,Inpp5d,Irf8,Lta,Ltb,Lyn,Maml1,Mfng,Nfkbia,Notch2,Prkcd,Pten,Ptpn6,Rac2,Rgs1,Siglec1,Srf,Stk4,Tcf3,Tlr7,Tlr8,Tnfrsf13c,Traf2,Vav1,Vav2,Vav3	NA	NA	NA	NA	NA	NA	NA	NA	NA	NA	NA
Mouse Phenotype	abnormal mature B cell morphology	0		0					1.34809e-124			0		Adam10,Aff1,Apoe,Arhgdia,Arhgdib,Arhgef1,Arid3a,B2m,Bak1,Batf,Bax,Bcl10,Bik,Birc2,Birc3,Bst1,Cd19,Cd22,Cd72,Cd79a,Cd81,Cd84,Cdkn2b,Cebpe,Chuk,Cxcr4,Cxcr7,Dapp1,Dll1,Dock2,Dock8,Dtx1,Eef1a2,Elf1,Ets1,Ewsr1,Fasl,Fli1,Flt3,Foxo1,Gadd45b,Ggta1,Gimap1,Gimap5,Git2,Gna13,Gp49a,Grb2,Igll1,Ikzf1,Il5ra,Il6st,Inpp5d,Irf2,Irf8,Lat,Lilrb3,Lilrb4,Lta,Ltb,Lyn,Maml1,Mbl2,Mcl1,Mcm3ap,Mfng,Msh2,Msi2,Mt1,Mt2,Myb,My…	NA	Adam10,Aff1,Arhgef6,Arid3a,Arntl,B2m,Bank1,Bcl10,Bik,Birc2,Birc3,Blk,Bst1,Cd19,Cd81,Dapp1,Dtx1,Ewsr1,Fasl,Flt3,Foxp3,Ggta1,Git2,Gpr183,Grb2,Icos,Ikzf1,Il2rb,Il2rg,Inpp5d,Irf2,Klhl6,Lat,Malt1,Mcl1,Mcm3ap,Mfng,Msi2,Myb,Nbn,Nfkb1,Otc,Pfdn1,Pik3r1,Ppp2r3c,Ptpn6,Rac2,Rag1,Rgs1,Runx1,S1pr2,Samsn1,Sash3,Sema4d,Sfpi1,Sh2b2,Siae,Siglecg,Slc3a2,Spen,Stim1,Stim2,Stk4,Tlr7,Tlr8,Tnfrsf13c,Tnfsf14,Vav1,Xrcc6	NA	NA	NA	NA	Bach2,Cd84,Cdkn2b,Dock8,Ets1,Fli1,Flt3,Ggta1,Gimap1,Gimap5,Ikzf1,Irf2,Klhl6,Lta,Ltb,Lyn,Nfkbia,Pik3r1,Plcg2,Rgs1,Socs1,Tlr7,Tlr8,Tnf,Ubash3a,Zc3h12a	NA	NA	Aff1,Apoe,Arhgdib,Arhgef6,Arntl,B2m,Bak1,Bax,Bcl10,Bcl2l11,Bik,Birc2,Birc3,Cd19,Cd72,Cebpe,Dapp1,Dicer1,Dtx1,Elf1,Ets1,Ewsr1,Fasl,Fli1,Flt3,Gadd45b,Ggta1,Git2,Gna13,Gpr183,Grb2,Igll1,Ikzf1,Ikzf3,Il2rb,Il7r,Inpp5d,Irf2,Irf8,Itk,Klhl6,Klhl7,Lat,Ltbr,Maml1,Mcl1,Mcm3ap,Mfng,Msi2,Mt1,Mt2,Myb,Myd88,Nfkb1,Nkx3-1,Pbx1,Pfdn1,Pik3ap1,Pik3r1,Plcg2,Ppp2r3c,Prkcd,Ptpn6,Ptprj,Rac2,Rgs1,Runx1,Samsn1,Sash3,Sema4…	NA
Mouse Phenotype	abnormal megakaryocyte morphology	0		0					1.06914e-78			0		1190003J15Rik,Adam17,Adamts13,Ap3d1,Bak1,Bax,Cd19,Cd74,Cflar,Chd2,Clec1b,Clic1,Cno,Dok2,Egr1,Erg,Fli1,Flt3,Foxn1,Fut7,Gem,Gimap5,Gp1ba,Hps4,Hyal2,Il6st,Inpp5d,Irf8,Kit,Lyl1,Lyn,Mafk,Mdm4,Mecom,Meis1,Mfap2,Mll1,Mll5,Mmp9,Myb,Myh9,Ncoa3,Nfe2,Nfe2l2,Pdgfrb,Pf4,Pim1,Pip5k1c,Plek,Pot1b,Pten,Rc3h1,Rnf2,Rpl27a,Runx1,Sbds,Sh2b3,Slc19a2,Slx4,Socs1,Sos1,Spred2,Spsb2,St3gal4,Stk11,T,Thoc5,Tlr9,Treml1,Trp53,…	NA	1190003J15Rik,2010002N04Rik,Abca1,Add1,Arid4b,Arntl,Bnip3l,C1galt1,Cbl,Cd19,Cd47,Clic1,Cno,Ctsg,Dkc1,Egr1,Erg,Esr2,Flt3,Foxp3,Fyb,Gata1,Gmnn,Gp1ba,Hps4,Id1,Il2rg,Inpp5d,Itgb2,Kit,Mdm2,Mll5,Muted,Myb,Myh9,Ncoa3,Pik3c2a,Pim1,Pim2,Pot1b,Rabggta,Rag1,Rb1,Rnf2,Runx1,Slx4,Sox17,Spred2,St3gal4,Stim1,Tet2,Thoc5,Tln1,Tom1l2,Treml1,Trp53,Vhl,Zfp385a,Zfpm1	NA	NA	NA	NA	Clec1b,Fli1,Flt3,Fyb,Gimap5,Hps5,Lyn,Mafk,Mdm4,Myh9,Pdgfb,Rab27a,Serpinb2,Socs1,Spred2,Tom1l2,Zc3h12a,Zfp36l2	NA	NA	Abca1,Add1,Arid4a,Arid4b,Arntl,Bak1,Bax,Bcl2l11,C1galt1,Cbl,Ccna2,Ccne1,Cd19,Cd47,Cflar,Chd2,Clic1,Cno,Ctsg,Dicer1,Dkc1,Dok1,Egr1,Erg,Esr2,Fgf2,Fli1,Flt3,Foxn1,Fut7,Fyb,Gata1,Gem,Gfi1b,Gp1ba,Hba-a2,Hba-x,Hps4,Hps5,Hyal2,Id1,Inpp5d,Irf8,Itgb2,Lif,Ly6a,Mafk,Mdm4,Meis1,Mfap2,Muted,Myb,Myh9,Ncoa3,Nfe2,Nfe2l2,Nkx3-1,Pdgfb,Pf4,Pim1,Pim2,Plek,Pot1b,Pros1,Rabggta,Rb1,Rpl27a,Runx1,Slc4a1,Socs1,Spred2,St3g…	NA
Mouse Phenotype	abnormal megakaryocyte progenitor cell morphology	0		0					5.68501e-88		1.09268e-76	0		1190003J15Rik,Adam17,Adamts13,Ap3d1,Bak1,Bax,Cbfa2t3,Cd19,Cd74,Cdkn2b,Cflar,Chd2,Clec1b,Clic1,Cno,Dok2,Egr1,Ep400,Erg,Fli1,Flt3,Foxn1,Fut7,Gem,Gimap5,Gp1ba,Hps4,Hyal2,Il6st,Inpp5d,Irf8,Kit,Lyl1,Lyn,Mafk,Mdm4,Mecom,Meis1,Mfap2,Mll1,Mll5,Mmp9,Myb,Myh9,Ncoa3,Nfe2,Nfe2l2,Pdgfrb,Pf4,Pim1,Pip5k1c,Plek,Pot1b,Pten,Rc3h1,Rnf2,Rpl27a,Runx1,Sbds,Sh2b3,Slc19a2,Slx4,Socs1,Sos1,Spred2,Spsb2,St3gal4,Stk11,T,Tho…	NA	1190003J15Rik,2010002N04Rik,Abca1,Add1,Arid4b,Arntl,Bnip3l,C1galt1,Cbfa2t3,Cbl,Cd19,Cd47,Clic1,Cno,Ctsg,Dkc1,Egr1,Erg,Esr2,Flt3,Foxp3,Fyb,Gata1,Gmnn,Gp1ba,Hps4,Icam2,Id1,Il2rg,Inpp5d,Itgb2,Kit,Mdm2,Mll5,Muted,Myb,Myh9,Ncoa3,Pik3c2a,Pim1,Pim2,Pot1b,Rabggta,Rag1,Rb1,Rnf2,Runx1,Slx4,Sox17,Spred2,St3gal4,Stim1,Tet2,Thoc5,Tln1,Tom1l2,Treml1,Trp53,Vhl,Zfp385a,Zfpm1	NA	NA	NA	NA	Cdkn2b,Clec1b,Fli1,Flt3,Fyb,Gimap5,Hps5,Icam2,Lyn,Mafk,Mdm4,Myh9,Pdgfb,Rab27a,Serpinb2,Socs1,Spred2,Tom1l2,Zc3h12a,Zfp36l2	NA	2010002N04Rik,Cbfa2t3,Cd47,Gata1,Gfi1b,Itga2b,Lyl1,Mafk,Nfe2,Pim2,Runx1,Thoc5,Treml1,Zfpm1	Abca1,Add1,Arid4a,Arid4b,Arntl,Bak1,Bax,Bcl2l11,C1galt1,Cbfa2t3,Cbl,Ccna2,Ccne1,Cd19,Cd47,Cflar,Chd2,Clic1,Cno,Ctsg,Dicer1,Dkc1,Dok1,Egr1,Ep400,Erg,Esr2,Fgf2,Fli1,Flt3,Foxn1,Fut7,Fyb,Gata1,Gata2,Gem,Gfi1b,Gp1ba,Hba-a2,Hba-x,Hps4,Hps5,Hyal2,Icam2,Id1,Inpp5d,Irf8,Itgb2,Lif,Ly6a,Mafk,Mdm4,Meis1,Mfap2,Muted,Myb,Myh9,Ncoa3,Nfe2,Nfe2l2,Nkx3-1,Pdgfb,Pf4,Pim1,Pim2,Plek,Pot1b,Pros1,Rabggta,Rb1,Rpl27a,Runx…	NA
Mouse Phenotype	abnormal mononuclear cell differentiation	0		0					1.99473e-249		4.19686e-154	0		Abi1,Ada,Adam10,Aff1,Akt1,Akt3,Apc,Apoe,Appl1,Arhgdia,Arhgdib,Arhgef1,Arid3a,Axl,B2m,B9d2,BC096441,Bak1,Batf,Bax,Bcl10,Bcl11a,Bcl3,Bik,Birc3,Birc5,Braf,Bst1,Carm1,Casp3,Cbfa2t3,Ccl5,Ccnd1,Ccnd2,Ccr2,Ccr5,Ccr7,Cd19,Cd22,Cd247,Cd24a,Cd28,Cd3d,Cd3e,Cd3g,Cd48,Cd5l,Cd69,Cd72,Cd74,Cd79a,Cd80,Cd81,Cd83,Cdkn1b,Cdkn2a,Chuk,Cks1b,Clec4n,Col10a1,Cops5,Cpa3,Crip3,Cry2,Csf1r,Ctcf,Cxcr4,Dapp1,Dbnl,Dck,Def6,Dff…	NA	Abi1,Ada,Adam10,Aff1,Aplf,Arhgef12,Arhgef6,Arid3a,Arntl,Asxl1,Axl,B2m,B3gnt2,B9d2,BC096441,Bank1,Bcl10,Bcl11a,Bik,Birc3,Blk,Bst1,C3,Casp3,Cbfa2t3,Cbl,Ccnd2,Ccr2,Ccr5,Ccr7,Cd19,Cd247,Cd24a,Cd276,Cd40lg,Cd80,Cd81,Cdkn1b,Clec4n,Col10a1,Cpa3,Crlf2,Cry2,Csf2rb,Csf2rb2,Ctcf,Ctla4,Ctsd,Dapp1,Dck,Dffb,Diap1,Dkc1,Dll4,Drosha,Dtx1,E2f1,E2f2,Ebi3,Erg,Ern1,Esr2,Ewsr1,Fasl,Fbxo30,Flt3,Foxo3,Foxp3,Fyb,Fyn,Gadd…	NA	NA	NA	NA	Akt1,B3gnt2,Bach2,Bcl11a,Ccl5,Cd276,Cd48,Cd69,Cdkn2a,E2f2,Elk4,Ern1,Ets1,Fli1,Flt3,Fyb,Ggta1,Gimap1,Gimap5,H2-D1,Hivep3,Hsh2d,Id3,Ikzf1,Il21r,Il4ra,Irf2,Itpkb,Klf2,Klhl6,Ksr1,Lta,Ltb,Ly9,Lyn,Mdc1,Nfkbia,Nos2,Notch1,Pik3r1,Plcg2,Prkcq,Runx3,Slamf1,Slc46a2,Socs1,Sp3,Stat1,Stat4,Sucnr1,Tec,Tnf,Txnip,Ubash3a,Zc3h12a	NA	Arid3a,Bbc3,Cbfa2t3,Ccr2,Ccr5,Csf2rb,Csf2rb2,Dapp1,E2f2,Fasl,Ggta1,Id3,Ifngr2,Il2rb,Klf13,Ksr1,Lyl1,Nos2,Pim2,Ptpn22,Ptprj,Rap1a,Runx1,Runx3,Sh2d2a,Spna1,Sucnr1,Suv420h2,Tac4,Thoc5,Tnfrsf13c,Tspan32,Xrcc6	Abcg1,Ada,Aff1,Akt1,Aplf,Apoe,Ar,Arhgdib,Arhgef12,Arhgef6,Arid4a,Arntl,Atm,Axl,B2m,B3gnt2,B9d2,BC096441,Bak1,Bax,Bcl10,Bcl2l11,Bik,Birc3,Birc5,C3ar1,Casp3,Cbfa2t3,Cbl,Ccnd2,Ccr2,Ccr5,Ccr7,Cd19,Cd226,Cd247,Cd24a,Cd276,Cd40lg,Cd72,Cdkn1b,Chd4,Chek2,Cks1b,Clec4n,Cpa3,Cry2,Csf2rb,Csf2rb2,Csk,Ctcf,Ctsd,Ctse,Dapp1,Def6,Diap1,Dicer1,Dkc1,Dll4,Dok1,Drosha,Dtx1,E2f2,E2f4,Ebi3,Elf1,Ercc1,Erg,Ern1,Esr2,Ets1…	NA
Mouse Phenotype	abnormal mononuclear cell morphology	0		0					0		7.7411e-245	0		AI848100,Abi1,Ace,Ada,Adam10,Adam17,Adrb2,Aff1,Aim2,Akt1,Akt3,Amhr2,Ank,Ankrd11,Apc,Apoa1,Apoa4,Apoc3,Apoe,Appl1,Arhgdia,Arhgdib,Arhgef1,Arid3a,Arsa,Axl,B2m,B4galt1,B9d2,BC096441,Bak1,Batf,Batf3,Bax,Bcl10,Bcl11a,Bcl3,Bik,Birc2,Birc3,Birc5,Braf,Brca2,Bst1,C4b,Carm1,Casp3,Cbfa2t3,Ccl2,Ccl25,Ccl5,Ccl7,Ccm2,Ccnd1,Ccnd2,Ccr10,Ccr2,Ccr3,Ccr4,Ccr5,Ccr7,Cd19,Cd207,Cd22,Cd247,Cd24a,Cd28,Cd3d,Cd3e,Cd3g,Cd4…	NA	2010002N04Rik,AI848100,Abi1,Ace,Ada,Adam10,Adrb2,Aff1,Amhr2,Ank,Ankrd11,Aplf,Arhgap15,Arhgef12,Arhgef6,Arid3a,Arid4b,Arntl,Asxl1,Axl,B2m,B3gnt2,B4galt1,B9d2,BC096441,Bank1,Bcl10,Bcl11a,Bik,Birc2,Birc3,Blk,Bnip3l,Bst1,Btrc,C3,C4b,Casp3,Cbfa2t3,Cbl,Ccnd2,Ccr10,Ccr2,Ccr3,Ccr5,Ccr7,Cd19,Cd247,Cd24a,Cd274,Cd276,Cd40lg,Cd44,Cd47,Cd80,Cd81,Cdkn1b,Cebpb,Chi3l1,Chst3,Clec4e,Clec4n,Col10a1,Comt,Cpa3,Cr1l,C…	NA	NA	NA	NA	Akt1,B3gnt2,Bach2,Bcl11a,Ccl5,Cd276,Cd48,Cd69,Cd84,Cdkn2a,Cdkn2b,Cebpb,Chst3,Clec1b,Clec2d,Cnn2,Csf3r,Dock8,E2f2,Elk4,Ern1,Ets1,Fli1,Flt3,Fyb,Ggta1,Gimap1,Gimap5,Gsx1,H2-D1,Hivep3,Hsh2d,Id3,Ier3,Ikzf1,Il21r,Il4ra,Irf2,Itgb3,Itpkb,Klf2,Klhl6,Ksr1,Lgals9,Lta,Ltb,Ly9,Lyn,Mdc1,Myh9,Nfkbia,Nos2,Notch1,Pdgfb,Pik3r1,Plcg2,Prkcq,Psap,Rgs1,Runx3,Serpinb2,Slamf1,Slc46a2,Socs1,Sp3,Sqstm1,Stat1,Stat4,Sucnr1,…	NA	2010002N04Rik,AI848100,Aim2,Ankrd11,Arid3a,Bbc3,Cbfa2t3,Ccr2,Ccr3,Ccr5,Cd47,Chst3,Csf2rb,Csf2rb2,Dapp1,E2f2,Fasl,Gata1,Ggta1,Id3,Ifngr2,Il2rb,Klf13,Ksr1,Lbr,Lgals9,Lgmn,Lyl1,Mpo,Mtf1,Naglu,Nfe2,Nos2,Pim2,Psap,Ptpn22,Ptprj,Rap1a,Rfx5,Runx1,Runx3,Sh2d2a,Spna1,St3gal1,Sucnr1,Suv420h2,Tac4,Thoc5,Tmprss6,Tnfrsf13c,Tspan32,Xrcc6,Zfpm1	AI848100,Abcg1,Ace,Ada,Adrb2,Aff1,Aim2,Akt1,Ank,Ankrd11,Aplf,Apoa1,Apoa4,Apoc3,Apoe,Ar,Arhgap15,Arhgdib,Arhgef12,Arhgef6,Arid4a,Arid4b,Arntl,Arsa,Atm,Axl,B2m,B3gnt2,B4galt1,B9d2,BC096441,Bak1,Batf3,Bax,Bcl10,Bcl2l11,Bik,Birc2,Birc3,Birc5,Bmpr1a,C3ar1,Casp3,Cbfa2t3,Cbl,Ccnd2,Ccr10,Ccr2,Ccr3,Ccr5,Ccr7,Cd19,Cd226,Cd247,Cd24a,Cd274,Cd276,Cd40lg,Cd44,Cd47,Cd72,Cd9,Cdkn1b,Cds2,Cebpb,Cebpe,Cflar,Chd2,Ch…	NA
Mouse Phenotype	abnormal mononuclear phagocyte morphology	0		0								0		AI848100,Ada,Adam17,Adrb2,Ank,Ankrd11,Apoa1,Apoa4,Apoc3,Apoe,Arsa,B2m,B9d2,Batf3,Bcl3,Bik,Birc3,C4b,Casp3,Ccl2,Ccl7,Ccm2,Ccr2,Ccr3,Ccr4,Cd19,Cd207,Cd44,Cd74,Cd79a,Cd81,Cdkn2b,Cebpa,Cebpb,Cflar,Clec2d,Clec4e,Cnp,Cntf,Col10a1,Csf1,Csf1r,Csf3r,Ctnnb1,Cx3cr1,Cxcl14,Cyp27b1,Diap1,Dok2,Egr1,Farp2,Fcer1g,Fcgr2b,Fgfr2,Fgr,Fli1,Flt3,Flt3l,Fos,Fosl2,Fut4,Ggt1,Gjc2,Gnai2,Gnmt,Gp49a,Gpr55,Hcst,Hexb,Hfe2,Hhex…	NA	2010002N04Rik,AI848100,Ada,Adrb2,Ank,Ankrd11,Arhgap15,Arid4b,Arntl,B2m,B9d2,Bik,Birc3,Blk,C4b,Casp3,Ccr2,Ccr3,Cd19,Cd40lg,Cd44,Cd47,Cd81,Cebpb,Chi3l1,Clec4e,Col10a1,Ctnnb1,Ctsd,Diap1,Egr1,Esr2,Fcgr2b,Fgr,Flt3,Foxp3,Gab2,Gata1,Gfi1,Gnmt,Gpc3,Hhex,Iapp,Icam1,Id1,Idua,Ifnar1,Igf1r,Ikzf1,Il2rg,Il4,Il4ra,Inpp5d,Irak3,Itga4,Itgb2,Itgb3,Lepr,Mc4r,Mll5,Mpo,Mpz,Msi2,Ndufs4,Nfkb1,Ngfr,Nos2,Nr3c1,Pik3c2a,Pl…	NA	NA	NA	NA	NA	NA	NA	AI848100,Abcg1,Ada,Adrb2,Ank,Ankrd11,Apoa1,Apoa4,Apoc3,Apoe,Ar,Arhgap15,Arid4a,Arid4b,Arntl,Arsa,Atm,B2m,B9d2,Batf3,Bcl2l11,Bik,Birc3,Bmpr1a,Casp3,Ccr2,Ccr3,Cd19,Cd40lg,Cd44,Cd47,Cd9,Cebpb,Cflar,Chek2,Clcn7,Clec4e,Csf1,Csf3,Csf3r,Ctsd,Ctsl,Ctss,Cx3cl1,Cx3cr1,Diap1,Dok1,Dok3,Egr1,Esr2,Farp2,Fcgr2b,Fgr,Fli1,Flt3,Flt3l,Gab2,Gata1,Gfi1,Gjc2,Gnai2,Gnmt,Gpc3,Hfe2,Hhex,Hr,Id1,Ifna6,Ifnar1,Igf1r,Ikzf1,Il…	NA
Mouse Phenotype	abnormal myeloblast morphology/development	0		0					2.84637e-252		4.66288e-167	0		Abi1,Ada,Adam10,Aff1,Akt1,Akt3,Apc,Apoe,Appl1,Arhgdia,Arhgdib,Arhgef1,Arid3a,Atp7b,Axl,B2m,B9d2,BC096441,Bak1,Batf,Bax,Bcl10,Bcl11a,Bcl3,Bik,Birc3,Birc5,Braf,Bst1,Carm1,Casp3,Cbfa2t3,Ccl11,Ccl5,Ccnd1,Ccnd2,Ccr2,Ccr3,Ccr4,Ccr5,Ccr7,Cd19,Cd22,Cd247,Cd24a,Cd28,Cd34,Cd3d,Cd3e,Cd3g,Cd48,Cd5l,Cd69,Cd72,Cd74,Cd79a,Cd80,Cd81,Cd83,Cdkn1b,Cdkn2a,Cebpe,Cflar,Chuk,Cks1b,Clec4n,Col10a1,Cops5,Cpa3,Crip3,Cry2,C…	NA	Abi1,Ada,Adam10,Aff1,Aplf,Arhgef12,Arhgef6,Arid3a,Arid4b,Arntl,Asxl1,Axl,B2m,B3gnt2,B9d2,BC096441,Bank1,Bcl10,Bcl11a,Bik,Birc3,Blk,Bst1,C3,Casp3,Cbfa2t3,Cbl,Ccnd2,Ccr2,Ccr3,Ccr5,Ccr7,Cd19,Cd247,Cd24a,Cd276,Cd40lg,Cd80,Cd81,Cdkn1b,Clec4n,Col10a1,Cpa3,Crlf2,Cry2,Csf2rb,Csf2rb2,Ctcf,Ctla4,Ctsd,Dapp1,Dck,Dffb,Diap1,Dkc1,Dll4,Drosha,Dtx1,E2f1,E2f2,Ebi3,Erg,Ern1,Esr2,Ewsr1,Fasl,Fbxo30,Fcer1a,Flt3,Foxo3…	NA	NA	NA	NA	Akt1,B3gnt2,Bach2,Bcl11a,Ccl5,Cd276,Cd48,Cd69,Cdkn2a,Csf3r,E2f2,Elk4,Ern1,Ets1,Fli1,Flt3,Fyb,Ggta1,Gimap1,Gimap5,H2-D1,Hivep3,Hsh2d,Id3,Ikzf1,Il21r,Il4ra,Irf2,Itpkb,Klf2,Klhl6,Ksr1,Lta,Ltb,Ly9,Lyn,Mdc1,Nfkbia,Nos2,Notch1,Pik3r1,Plcg2,Prkcq,Runx3,Slamf1,Slc46a2,Socs1,Sp3,Stat1,Stat4,Sucnr1,Tec,Tnf,Txnip,Ubash3a,Zc3h12a	NA	Arid3a,Bbc3,Cbfa2t3,Ccr2,Ccr3,Ccr5,Csf2rb,Csf2rb2,Dapp1,E2f2,Fasl,Gata1,Ggta1,Id3,Ifngr2,Il2rb,Klf13,Ksr1,Lbr,Lyl1,Nos2,Pim2,Ptpn22,Ptprj,Rap1a,Runx1,Runx3,Sh2d2a,Spna1,Sucnr1,Suv420h2,Tac4,Thoc5,Tnfrsf13c,Tspan32,Xrcc6	Abcg1,Ada,Aff1,Akt1,Aplf,Apoe,Ar,Arhgdib,Arhgef12,Arhgef6,Arid4a,Arid4b,Arntl,Atm,Axl,B2m,B3gnt2,B9d2,BC096441,Bak1,Bax,Bcl10,Bcl2l11,Bik,Birc3,Birc5,C3ar1,Casp3,Cbfa2t3,Cbl,Ccnd2,Ccr2,Ccr3,Ccr5,Ccr7,Cd19,Cd226,Cd247,Cd24a,Cd276,Cd40lg,Cd72,Cdkn1b,Cebpe,Cflar,Chd4,Chek2,Cks1b,Clec4n,Cpa3,Cry2,Csf2rb,Csf2rb2,Csf3r,Csk,Ctcf,Ctsd,Ctse,Dapp1,Def6,Diap1,Dicer1,Dkc1,Dll4,Dok1,Drosha,Dtx1,E2f2,E2f4,Ebi3…	NA
Mouse Phenotype	abnormal myeloid leukocyte morphology	0		0								0		AI848100,Ada,Adam17,Adrb2,Ank,Ankrd11,Apoa1,Apoa4,Apoc3,Apoe,Arhgdia,Arhgdib,Arsa,Atp7b,B2m,B4galt1,B9d2,Batf3,Bcl3,Bik,Birc3,C4b,Casp3,Ccl11,Ccl2,Ccl3,Ccl7,Ccm2,Ccnd1,Ccr1,Ccr2,Ccr3,Ccr4,Cd19,Cd207,Cd34,Cd44,Cd74,Cd79a,Cd81,Cd97,Cdkn2b,Cebpa,Cebpb,Cebpe,Cerk,Cflar,Chst15,Clec2d,Clec4e,Cnp,Cntf,Col10a1,Cpa3,Csf1,Csf1r,Csf3r,Ctnnb1,Cx3cr1,Cxcl14,Cxcl15,Cxcl5,Cxcr2,Cyp27b1,Diap1,Dok2,Egr1,Elavl1,F3…	NA	2010002N04Rik,AI848100,Abhd5,Ada,Adrb2,Ank,Ankrd11,Arhgap15,Arid4b,Arntl,B2m,B4galt1,B9d2,Bik,Birc3,Blk,C3,C4b,Casp3,Ccr1,Ccr2,Ccr3,Cd19,Cd40lg,Cd44,Cd47,Cd81,Cd97,Cebpb,Cerk,Chi3l1,Clec4e,Col10a1,Cpa3,Csf2rb,Ctnnb1,Ctsd,Diap1,Drosha,Dusp1,Egr1,Esr2,Fasl,Fastk,Fbn1,Fcer1a,Fcgr2b,Fcgr3,Fgr,Flt3,Foxp3,Fyn,Gab2,Gadd45a,Gata1,Gcnt4,Gfi1,Git2,Gmnn,Gnmt,Gpc3,Gsx1,Hhex,Iapp,Icam1,Id1,Idua,Ier3,Ifnar1,Ig…	NA	NA	NA	NA	NA	NA	NA	AI848100,Abcg1,Abhd5,Ada,Adrb2,Ank,Ankrd11,Apoa1,Apoa4,Apoc3,Apoe,Ar,Arhgap15,Arhgdib,Arid4a,Arid4b,Arntl,Arsa,Atm,B2m,B4galt1,B9d2,Batf3,Bcl2l11,Bik,Birc3,Bmpr1a,C3ar1,Casp3,Ccne1,Ccr1,Ccr2,Ccr3,Cd19,Cd40lg,Cd44,Cd47,Cd9,Cd97,Cebpb,Cebpe,Cerk,Cflar,Chek2,Chst15,Clcn7,Clec4e,Cpa3,Csf1,Csf2rb,Csf3,Csf3r,Ctsd,Ctse,Ctsl,Ctss,Cx3cl1,Cx3cr1,Cxcl15,Cxcl5,Diap1,Dicer1,Dok1,Dok3,Drosha,E2f4,Egr1,Esr2,Far…	NA
Mouse Phenotype	abnormal myelopoiesis	0							2.06782e-58			0		Cbfa2t3,Cdkn2b,Cebpa,Cebpe,Cflar,Csf3r,Cxcr2,Cxcr4,Dok2,Flt3,Flt3l,Git2,Hhex,Hmga1,Ikzf1,Il10rb,Il17ra,Il6,Inpp5d,Irf8,Kit,Lbr,Lyn,Mecom,Mll1,Mll5,Mmp9,Mzf1,Nfkbia,Nr4a1,Pdcd1,Pias4,Pla2g4a,Plscr1,Pnp,Ppm1d,Rac2,Relb,Runx1,Sele,Selp,Sfpi1,Sh2b3,Sin3b,Slc11a1,Slc19a2,Slc37a4,Sod2,Tec,Tnf,Tyrobp,Zfp36	NA	NA	NA	NA	NA	NA	Bach2,Cdkn2b,Csf3r,Flt3,Hmga1,Ikzf1,Lyn,Nfkbia,Pla2g4a,Sin3b,Tec,Tnf	NA	NA	Abcg1,Cbfa2t3,Cebpe,Cflar,Csf3,Csf3r,Csk,Ctsg,Dicer1,Dok1,Flt3,Flt3l,Gab2,Gata1,Gfi1,Git2,Hhex,Hmga1,Id1,Ikzf1,Il10rb,Il17ra,Il6,Inpp5d,Irf8,Itgb2,Ly6a,Nfkb1,Plscr1,Plscr3,Pml,Ptprj,Rac2,Rb1,Relb,Runx1,Sfpi1,Slc11a1,Slc37a4,Tec,Tet2,Zfp36	NA
Mouse Phenotype	abnormal neutrophil morphology	0		0								0		Adam17,B4galt1,C4b,Casp3,Ccl2,Ccl3,Ccr2,Ccr4,Cd19,Cebpa,Cebpe,Cerk,Cflar,Clec4e,Csf1,Csf3r,Cxcl15,Cxcr2,Diap1,Dok2,Egr1,F3,Fasl,Fcgr3,Flt3,Flt3l,Foxn1,Fut4,Fut7,G6pc3,Gcnt4,Gem,Gimap5,Git2,Gnai2,Gnmt,Gsx1,Icam1,Ier3,Il17ra,Il6st,Inpp5d,Irf8,Itgam,Lbr,Lepr,Lyn,Mcl1,Mecom,Mll1,Mll5,Mt1,Mt2,Myb,Nr4a1,Pfdn1,Pggt1b,Plac8,Plscr1,Pomt1,Prex1,Prkcd,Ptch1,Pten,Ptpn6,Ptrh2,Rac2,Runx1,Sbds,Sele,Sell,Selp,Se…	NA	Arhgap15,Arid4b,Arntl,B4galt1,C3,C4b,Casp3,Ccr2,Cd19,Cd47,Cerk,Clec4e,Diap1,Egr1,Esr2,Fasl,Fastk,Fcgr3,Flt3,Gata1,Gcnt4,Gfi1,Git2,Gmnn,Gnmt,Gsx1,Icam1,Id1,Ier3,Il2rb,Il2rg,Inpp5d,Irak3,Itgb2,Lbr,Lepr,Mcl1,Mdm2,Mll5,Myb,Pfdn1,Pik3c2a,Plac8,Plscr1,Ptpn6,Ptrh2,Rac2,Rag1,Rbp1,Runx1,Sfpi1,Slc35c1,Stat3,Stat5b,Tbx21,Tec,Timp3,Zfpm1	NA	NA	NA	NA	NA	NA	NA	Abcg1,Arhgap15,Arid4a,Arid4b,Arntl,B4galt1,C3ar1,Casp3,Ccr2,Cd19,Cd47,Cebpe,Cerk,Cflar,Clec4e,Csf1,Csf3,Csf3r,Ctss,Cxcl15,Diap1,Dicer1,Dok1,Egr1,Esr2,Fasl,Fcgr3,Flt3,Flt3l,Foxn1,Fut7,Gata1,Gcnt4,Gem,Gfi1,Git2,Gnai2,Gnmt,Gsx1,Id1,Ier3,Il17ra,Il2rb,Inpp5d,Irak3,Irf8,Itgb2,Lepr,Ltbr,Ly6a,Mcl1,Mt1,Mt2,Myb,Pfdn1,Pla2g10,Plac8,Plscr1,Prkcd,Ptch2,Ptpn6,Ptrh2,Rac2,Rbp1,Runx1,Selplg,Sfpi1,Slc35c1,Slc37a4,…	NA
Mouse Phenotype	abnormal neutrophil physiology	0										0		Apoe,Arhgef1,B4galt1,Ccl2,Ccr1,Cd44,Cd69,Cebpe,Chuk,Clec7a,Csf3r,Ctsc,Cxcl5,Cxcr2,Dock2,Fcgr3,Fgr,Flot1,Fut4,Fut7,G6pc3,Git2,Gnai2,Icam1,Il17ra,Il6,Inpp5d,Itgam,Kit,Lgals3,Lyn,Mcl1,Mll5,Mmp9,Mpo,Myd88,Myo1f,Npr1,Padi4,Pde4b,Plac8,Plau,Plaur,Plcb2,Pram1,Prex1,Prkcd,Pten,Rac2,Relb,Rock2,Sele,Selk,Sell,Selp,Selplg,Slamf6,Slc37a4,Smad3,Sykb,Tax1bp1,Tnf,Tpsab1,Tpsb2,Vav1,Vav2,Vav3	NA	NA	NA	NA	NA	NA	NA	NA	NA	Adora3,Alox5,Apoe,Arhgap15,B4galt1,C3ar1,C5ar1,Casp1,Ccr1,Cd44,Cd47,Cebpe,Clcn3,Csf3,Csf3r,Cxcl5,Cyba,Fcgr3,Fgr,Flot1,Fut7,Git2,Gnai2,Il17ra,Il1a,Il1b,Il6,Inpp5d,Itgb2,Ltb4r1,Mcl1,Mpo,Mpp1,Myd88,Ncf4,Padi4,Pla2g10,Plac8,Plau,Plaur,Prkcd,Rac2,Rap1a,Relb,Rock2,Selplg,Slc37a4,Smad3,Tnfrsf1a,Vav1,Vav2,Vav3	NA
Mouse Phenotype	abnormal phagocyte morphology	0		0								0		AI848100,Ada,Adam17,Adrb2,Ank,Ankrd11,Apoa1,Apoa4,Apoc3,Apoe,Arsa,B2m,B4galt1,B9d2,Batf3,Bcl3,Bik,Birc3,C4b,Casp3,Ccl2,Ccl3,Ccl7,Ccm2,Ccr2,Ccr3,Ccr4,Cd19,Cd207,Cd44,Cd74,Cd79a,Cd81,Cdkn2b,Cebpa,Cebpb,Cebpe,Cerk,Cflar,Clec2d,Clec4e,Cnp,Cntf,Col10a1,Csf1,Csf1r,Csf3r,Ctnnb1,Cx3cr1,Cxcl14,Cxcl15,Cxcr2,Cyp27b1,Diap1,Dok2,Egr1,F3,Farp2,Fasl,Fcer1g,Fcgr2b,Fcgr3,Fgfr2,Fgr,Fli1,Flt3,Flt3l,Fos,Fosl2,Foxn1,…	NA	2010002N04Rik,AI848100,Ada,Adrb2,Ank,Ankrd11,Arhgap15,Arid4b,Arntl,B2m,B4galt1,B9d2,Bik,Birc3,Blk,C3,C4b,Casp3,Ccr2,Ccr3,Cd19,Cd40lg,Cd44,Cd47,Cd81,Cebpb,Cerk,Chi3l1,Clec4e,Col10a1,Ctnnb1,Ctsd,Diap1,Egr1,Esr2,Fasl,Fastk,Fcgr2b,Fcgr3,Fgr,Flt3,Foxp3,Gab2,Gata1,Gcnt4,Gfi1,Git2,Gmnn,Gnmt,Gpc3,Gsx1,Hhex,Iapp,Icam1,Id1,Idua,Ier3,Ifnar1,Igf1r,Ikzf1,Il2rb,Il2rg,Il4,Il4ra,Inpp5d,Irak3,Itga4,Itgb2,Itgb3,Lb…	NA	NA	NA	NA	NA	NA	NA	AI848100,Abcg1,Ada,Adrb2,Ank,Ankrd11,Apoa1,Apoa4,Apoc3,Apoe,Ar,Arhgap15,Arid4a,Arid4b,Arntl,Arsa,Atm,B2m,B4galt1,B9d2,Batf3,Bcl2l11,Bik,Birc3,Bmpr1a,C3ar1,Casp3,Ccr2,Ccr3,Cd19,Cd40lg,Cd44,Cd47,Cd9,Cebpb,Cebpe,Cerk,Cflar,Chek2,Clcn7,Clec4e,Csf1,Csf3,Csf3r,Ctsd,Ctsl,Ctss,Cx3cl1,Cx3cr1,Cxcl15,Diap1,Dicer1,Dok1,Dok3,Egr1,Esr2,Farp2,Fasl,Fcgr2b,Fcgr3,Fgr,Fli1,Flt3,Flt3l,Foxn1,Fut7,Gab2,Gata1,Gcnt4,Gem…	NA
Mouse Phenotype	abnormal physiological response to xenobiotic	0												Abcc1,Ace,Adam17,Adamts13,Adh5,Adora2b,Adrb2,Adrbk1,Agtr1b,Akt3,Als2,Apc,Arhgef1,Atf6,Bak1,Bax,Brca2,Cacna1a,Casc1,Casp3,Ccl2,Ccr2,Ccr7,Cd19,Cd34,Cdkn1b,Cdkn2a,Cdkn2b,Cebpa,Cebpb,Cox15,Cpa3,Cpb2,Csf1,Cul9,Cx3cr1,Cxcl16,Dnase1,Dock2,Egr1,Ercc1,Errfi1,Faim3,Ffar3,Fgfr2,Flcn,Foxm1,Foxn1,Gabbr2,Gabra2,Gal,Gast,Gnai2,Gnaz,Gpbar1,Gpr55,Gsta3,Hcst,Hif1a,Hint1,Hyou1,Ifnar1,Ifngr1,Il6,Il6st,Insr,Irf1,Ivns…	NA	NA	NA	NA	NA	NA	NA	NA	NA	NA	NA
Mouse Phenotype	abnormal protein level	0		0					2.51259e-157			0		AI848100,Abcb4,Ace,Ada,Adam17,Adamts13,Adora2b,Agt,Agtr1b,Aim2,Ank,Apoe,Arhgdia,Arhgdib,Arrb2,Atp8b1,Axl,B2m,Bag4,Card9,Cbs,Ccl2,Ccl3,Ccr2,Ccr3,Ccr5,Cd19,Cd28,Cd33,Cd44,Cebpa,Cebpb,Cfb,Chuk,Clic4,Cpb2,Cry2,Csf1,Csf1r,Ctsc,Cxcl16,Cxcl5,Cxcr2,Cxcr3,Cyp27b1,Dag1,Darc,Dll1,Dtx1,Ebi3,Egr1,F2r,F3,Fadd,Faim3,Fasl,Fcgrt,Fech,Fgfr2,Flt3,Fos,Foxn1,Ganc,Gimap5,Gnai2,Gne,Gnmt,Gp49a,Gtf3c2,Hexb,Hif1a,Hlx,Hmox…	NA	AI848100,Abca1,Ace,Ada,Agtr1a,Agtr1b,Aip,Ank,Arntl,Atp8b1,Axl,B2m,Bag4,C3,Card9,Ccr2,Ccr3,Ccr5,Cd19,Cd44,Cd47,Cd59a,Cd59b,Cebpb,Cfb,Clic4,Creb3l3,Cry2,Csf2rb,Ctla4,Ctsc,Dag1,Dtx1,Dusp1,Ebi3,Egr1,Eif2ak3,Ern1,Esr2,F2r,F2rl1,Fasl,Fcer1a,Fech,Fga,Fgg,Flt3,Foxp3,Fyn,Gata1,Gnmt,Gtf3c2,Hdac3,Hnf1a,Icam1,Icos,Idua,Ier3,Ifih1,Ifnar1,Ifnar2,Ighmbp2,Il10rb,Il1a,Il1b,Il4,Il4ra,Inpp5d,Iqgap2,Irak2,Irf1,Irgm1…	NA	NA	NA	NA	Agt,Ccl3,Cebpb,Clic4,Cpb2,Ctsc,Ern1,F2r,Flt3,Gimap5,Ier3,Il12a,Il4ra,Il6ra,Itgb3,Klra10,Klra17,Lta,Lyn,Ncf1,Nfkbia,Nos2,Pla2g4a,Runx3,Slamf6,Socs1,Sqstm1,Stat1,Stat4,Sucnr1,Tlr7,Tlr8,Tnf,Vamp8	NA	NA	AI848100,Abca1,Abcb4,Acaca,Ace,Ada,Agtr1b,Ahi1,Aim2,Aip,Ank,Apoe,Arhgdib,Arntl,Atp8b1,Axl,B2m,Bcmo1,C3ar1,Casp1,Casp12,Casp4,Cbs,Ccr2,Ccr3,Ccr5,Cd19,Cd44,Cd47,Cd59a,Cd59b,Cebpb,Clic4,Col4a3,Cpb2,Creb3l3,Cry2,Csf1,Csf2rb,Ctse,Cxcl5,Cyp11b2,Cyp1a2,Dag1,Darc,Dtx1,Ebi3,Egr1,Eif2ak3,Ern1,Esr2,F2,F2r,Fadd,Fasl,Fech,Flt3,Foxn1,Gata1,Gnai2,Gnmt,Hlx,Hnf1a,Hp,Hpn,Htra2,Ier3,Ifih1,Ifnar1,Ifnar2,Ighmbp2,Igtp…	NA
Mouse Phenotype	abnormal renal corpuscle morphology	0										0		AI848100,Ace,Actn4,Ada,Adipoq,Agt,Agtr1b,Apoe,Aprt,Arhgdia,Atp7a,Bak1,Bax,Bcam,Bmp7,C4b,Ccni,Ccr2,Cd19,Cebpb,Cfb,Chd2,Comt,Cpb2,Dnase1,Dtx1,E2f2,Ehd2,Ehd4,Etv5,Fasl,Fbln1,Fcer1g,Fcgr2b,Fgfr2,Fh1,Flcn,Gadd45b,Glb1,Glis2,Gne,Gpr4,Gtf3c2,Ifnar1,Ifngr1,Igf2bp1,Il12rb2,Il5ra,Inpp5e,Irf1,Itga3,Kit,Lama5,Lat,Ldb1,Lepr,Limk2,Lmx1b,Lyn,Mafb,Man2a1,Mdm4,Mgat2,Mgat5,Mmp9,Mt1,Mt2,Mta2,Naglu,Nfe2l2,Nos2,Notch…	NA	NA	NA	NA	NA	NA	NA	NA	NA	AI848100,Abca1,Ace,Actn4,Ada,Adm,Agtr1b,Angpt1,Apoe,Aprt,Atp7a,Bak1,Bax,Bcam,Bcl2l11,C1galt1,Ccni,Ccr2,Cd19,Cd55,Cebpb,Chd2,Col4a3,Col4a4,Comt,Cpb2,Dkc1,Dtx1,E2f2,Ehd2,Fasl,Fcgr2b,Fgf8,Gadd45a,Gadd45b,Golm1,Hp,Hr,Ifnar1,Igf2bp1,Ikzf3,Il12rb2,Il4,Itga1,Itga3,Lama5,Lamc1,Lat,Lepr,Lgr4,Lmx1b,Mapt,Mdm4,Mt1,Mt2,Mta2,Nfe2l2,Nkx3-1,Nos2,Nr3c2,Pbx1,Pdgfb,Pds5a,Pdss2,Plcg2,Podxl,Prdx6,Prkcd,Psen1,Psen2,Pt…	NA
Mouse Phenotype	abnormal renal glomerulus morphology	0										0		AI848100,Ace,Actn4,Ada,Adipoq,Agt,Agtr1b,Apoe,Arhgdia,Atp7a,Bak1,Bax,Bcam,Bmp7,C4b,Ccni,Ccr2,Cd19,Cebpb,Cfb,Chd2,Comt,Dnase1,Dtx1,E2f2,Ehd2,Ehd4,Etv5,Fasl,Fbln1,Fcer1g,Fcgr2b,Fgfr2,Fh1,Flcn,Gadd45b,Glb1,Glis2,Gne,Gpr4,Gtf3c2,Ifnar1,Ifngr1,Igf2bp1,Il12rb2,Il5ra,Irf1,Itga3,Kit,Lama5,Lat,Ldb1,Lepr,Limk2,Lmx1b,Lyn,Mafb,Man2a1,Mdm4,Mgat2,Mgat5,Mmp9,Mta2,Naglu,Nfe2l2,Nos2,Notch2,Nphs1,Pax8,Pbx1,Pdcd1,P…	NA	NA	NA	NA	NA	NA	NA	NA	NA	AI848100,Abca1,Ace,Actn4,Ada,Adm,Agtr1b,Angpt1,Apoe,Atp7a,Bak1,Bax,Bcam,Bcl2l11,C1galt1,Ccni,Ccr2,Cd19,Cd55,Cebpb,Chd2,Col4a3,Col4a4,Comt,Dkc1,Dtx1,E2f2,Ehd2,Fasl,Fcgr2b,Fgf8,Gadd45a,Gadd45b,Golm1,Hp,Hr,Ifnar1,Igf2bp1,Ikzf3,Il12rb2,Il4,Itga1,Itga3,Lama5,Lamc1,Lat,Lepr,Lgr4,Lmx1b,Mapt,Mdm4,Mta2,Nfe2l2,Nkx3-1,Nos2,Nr3c2,Pbx1,Pdgfb,Pds5a,Pdss2,Plcg2,Podxl,Prdx6,Prkcd,Psen1,Psen2,Relb,Rpl22,Rxra,Scgb…	NA
Mouse Phenotype	abnormal response to infection	0		0					4.30181e-164			0		Adamts13,Adh5,Adprh,Aim2,Apoe,B2m,BC096441,Bcl10,Bcl3,Brca2,C4b,Card9,Ccl2,Ccl3,Ccnd1,Ccr1,Ccr2,Ccr4,Ccr5,Cd19,Cd207,Cd24a,Cd28,Cd3g,Cd44,Cd5l,Cd74,Cd81,Cd97,Cebpa,Cebpb,Cebpe,Cerk,Cfb,Clec4e,Clec4n,Clec7a,Clic4,Ctnnb1,Ctsc,Cx3cr1,Cxcl15,Cxcl16,Cxcl5,Cxcr2,Cxcr3,Dapp1,Ddit3,Defb1,Defb3,Dusp4,Ebag9,Ebi3,Erap1,Fadd,Fasl,Fcer1g,Fcgr1,Fgr,Flt3,Fos,Foxa1,Foxn1,Fut4,Fut7,G6pc3,Git2,Gnai2,Grb2,H2-Ab1,H2…	NA	Adprh,Apcs,Apobec3,Aqp9,Arhgap15,B2m,BC096441,Bcl10,C3,C4b,Card9,Ccr1,Ccr2,Ccr5,Cd19,Cd24a,Cd274,Cd40lg,Cd44,Cd47,Cd81,Cd97,Cebpb,Cerk,Cfb,Clcn3,Clec4e,Clec4n,Clic4,Csf2rb,Ctnnb1,Ctsc,Ctsg,Cybb,Dapp1,Ddit3,Defb1,Defb3,Dusp1,Ebag9,Ebi3,Fasl,Fgg,Fgr,Flt3,Gab2,Gata3,Git2,Gpc3,Grb2,Gzmb,H2-K1,Hc,Icam1,Icos,Ier3,Ifih1,Ifnar1,Ifnar2,Ifngr2,Iigp1,Ikzf1,Il1b,Il21r,Il2rg,Il4,Il4ra,Inpp5d,Irf1,Irf2,Irf9,Ir…	NA	NA	NA	NA	Ccl3,Cebpb,Clec7a,Clic4,Ctsc,Dusp4,Flt3,H2-D1,Hps5,Ier3,Ikzf1,Il12a,Il21r,Il4ra,Irf2,Itpkb,Klra10,Klra17,Lta,Ltb,Mbtps1,Ncf1,Nfkbia,Nos2,Notch1,Pik3r1,Plcg2,Prkcq,Slamf1,Slamf6,Smtn,Socs1,Stat1,Stat4,Tnf,Tom1l2,Vsig4	NA	NA	Aim2,Apoe,Aqp9,Arhgap15,B2m,BC096441,Bahd1,Bcl10,Bcl2l11,C5ar1,Casp1,Casp12,Cby1,Ccr1,Ccr2,Ccr5,Cd19,Cd24a,Cd274,Cd40lg,Cd44,Cd47,Cd97,Cebpb,Cebpe,Cerk,Chrna3,Chrnb4,Clcn3,Clec4e,Clec4n,Clic4,Csf2rb,Csf3,Csk,Ctsg,Cx3cr1,Cxcl15,Cxcl5,Cyba,Dapp1,Ddit3,Defb1,Defb3,Dicer1,E2f4,Ebag9,Ebi3,F2,Fadd,Fasl,Fcgr1,Fgr,Flt3,Foxn1,Fut7,Gab2,Git2,Gnai2,Gpc3,Grb2,Gzmb,H2-Ab1,H2-T23,Hc,Hps5,Ier3,Ifih1,Ifnar1,Ifna…	NA
Mouse Phenotype	abnormal self tolerance	0		0					1.47166e-121			0		Acan,Apoe,Arsa,Axl,B2m,B9d2,BC096441,Bak1,Batf,Bax,C4b,Ccl2,Ccr2,Ccr7,Ccr8,Cd19,Cd22,Cd28,Cd300lf,Cd38,Cd44,Cd69,Cd74,Cd79a,Cd80,Cdk4,Cfb,Chuk,Clec5a,Col17a1,Cry2,Cx3cr1,Cxcr2,Cxcr4,Def6,Dnase1,Dntt,Dtx1,Dusp2,E2f2,Ecm1,Elf1,Fadd,Fasl,Fbn1,Fcer1g,Fcgr1,Fcgr2b,Fcgr3,Fcrlb,Foxo1,Gadd45b,Gna13,Gpr132,H2-Ab1,H2-T23,Hc,Hcst,Hif1a,Icam1,Id3,Ifnar1,Ifngr1,Il10ra,Il12rb2,Il17f,Il21r,Il4ra,Il5ra,Il6,Il6st…	NA	Adamts5,Alox5,Apcs,Axl,B2m,B9d2,BC096441,Bmx,C3,C4b,Ccr2,Ccr7,Cd19,Cd274,Cd276,Cd300lf,Cd38,Cd40lg,Cd44,Cd55,Cd80,Cfb,Cry2,Ctla4,Dnase1,Dtx1,Dusp1,E2f1,E2f2,Ecm1,F2rl1,Fasl,Fbn1,Fcgr2b,Fcgr3,Fcrlb,Foxp3,Fyn,Gadd45a,Hc,Icam1,Icos,Id3,Ifnar1,Ifngr2,Il1a,Il1b,Il21r,Il2rb,Il4,Il4ra,Irf1,Itgav,Itgb2,Kit,Ksr1,Lat,Lat2,Lcp2,Lepr,Lgals1,Lgals9,Ltb4r1,Mapk14,Mbp,Mpo,Mpz,Ndst2,Nfkb1,Ngfr,Nos2,Nr3c1,Pdcd1lg…	NA	NA	NA	NA	Alox5ap,Cd276,Cd69,Dusp2,E2f2,Id3,Il12a,Il21r,Il4ra,Ksr1,Lgals9,Lta,Lyn,Ncf1,Nfkbia,Nos2,Pla2g4a,Plcg2,Prkcq,Socs1,Stat4,Tlr7,Tlr8,Tnf,Ubash3a,Zc3h12a	NA	NA	Adamts5,Alox5,Apoe,Arsa,Axl,B2m,B9d2,BC096441,Bak1,Bax,Bcl2l11,Bmx,C3ar1,Casp1,Ccr2,Ccr7,Ccr8,Cd19,Cd274,Cd276,Cd40lg,Cd44,Cd55,Cry2,Csf3,Ctsl,Ctss,Cx3cr1,Def6,Dtx1,E2f2,Ecm1,Elf1,F2,Fadd,Fasl,Fcgr1,Fcgr2b,Fcgr3,Fcrlb,Gadd45a,Gadd45b,Gna13,H2-Ab1,H2-T23,Hc,Hr,Id3,Ifnar1,Ifngr2,Ikzf3,Il10ra,Il12rb2,Il1a,Il1b,Il21r,Il27,Il2rb,Il4,Il4ra,Il6,Il9r,Itgb2,Ksr1,Lat,Lcp2,Lepr,Lgals1,Lgals9,Lin9,Ltb4r1,Map…	NA
Mouse Phenotype	abnormal single-positive T cell number	0		0					4.89297e-121			0		Adam10,Aff1,Apoe,Arhgdia,Arhgdib,B2m,B9d2,BC096441,Batf,Bcl11a,Ccl2,Ccl5,Ccnd1,Ccr2,Ccr4,Ccr7,Cd19,Cd247,Cd28,Cd3d,Cd3e,Cd3g,Cd48,Cd74,Cd79a,Cd83,Cd84,Cdkn2a,Cflar,Chd2,Col10a1,Cops5,Cpa3,Cr1l,Ctcf,Diap1,Dll1,Dock2,E2f2,Ebi3,Elavl1,Elk4,Ets1,Fadd,Fbxo30,Foxn1,Foxo1,Gem,Gimap1,Gimap5,Git2,Gna13,Gnai2,Gpr30,Grap,Grap2,Grb2,H2-Aa,H2-Ab1,H2-D1,H2-K1,Hcst,Id3,Ifngr1,Il21r,Il2ra,Il4ra,Il5ra,Il6st,Il9r,…	NA	Adam10,Aff1,Arhgef6,Asxl1,B2m,B9d2,BC096441,Bcl11a,Cbl,Ccr2,Ccr7,Cd19,Cd247,Cd274,Cd40lg,Chi3l1,Col10a1,Cpa3,Cr1l,Crlf2,Ctcf,Ctla4,Diap1,Dll4,Drosha,E2f1,E2f2,Ebi3,Esr2,Fbxo30,Foxp3,Fyn,Gata3,Git2,Gmnn,Grap2,Grb2,H2-K1,Icos,Id3,Il21r,Il2rb,Il2rg,Il4ra,Irf1,Itga4,Itgb2,Itpkb,Klf2,Lat,Lcp2,Lepr,Lgals9,Map3k3,Mcl1,Mpz,Msi2,Myb,Myh9,Nbn,Ncoa3,Nedd4,Nfatc2ip,Nfatc3,Nfkb1,Nos2,Notch1,Nr3c1,Nup98,Otc,Pd…	NA	NA	NA	NA	Bcl11a,Ccl5,Cd48,Cd84,Cdkn2a,E2f2,Elk4,Ets1,Gimap1,Gimap5,H2-D1,Id3,Il21r,Il4ra,Itpkb,Klf2,Lgals9,Myh9,Nfkbia,Nos2,Notch1,Runx3,Socs1,Sp3,Stat1,Tnf,Tom1l2,Txnip	NA	NA	Abcg1,Aff1,Apoe,Arhgdib,Arhgef6,Atm,B2m,B9d2,BC096441,Bcl2l11,Cbl,Ccr2,Ccr7,Cd19,Cd247,Cd274,Cd40lg,Cflar,Chd2,Chd4,Cpa3,Csk,Ctcf,Ctsl,Diap1,Dll4,Drosha,E2f2,Ebi3,Esr2,Ets1,Fadd,Foxn1,Gem,Git2,Gna13,Gnai2,Grap,Grap2,Grb2,H2-Aa,H2-Ab1,Htra2,Id3,Il21r,Il2rb,Il4ra,Il7r,Il9r,Itga4,Itgb2,Itgb7,Itk,Klf2,Lat,Lcp2,Lep,Lepr,Lgals9,Map3k3,Mcl1,Mpz,Msi2,Mt1,Mt2,Myb,Myh9,Ncoa3,Nedd4,Nfatc2ip,Nfatc3,Nfe2l2,Nf…	NA
Mouse Phenotype	abnormal skin condition	0												Acvr1b,Adam17,Akt1,Apc,Apoe,Atp2a2,Atp7a,Aurkb,B2m,B4galt1,Braf,Brca2,Calcrl,Camk2a,Cd34,Cdk11b,Cdkn2a,Cdkn2b,Cdsn,Cebpa,Chuk,Clec1b,Col17a1,Col5a1,Dgat1,Diap1,Dmtf1,E4f1,Egr1,Ercc1,Errfi1,Fasl,Fbn1,Fech,Fgfr2,Fos,Foxn1,Gfra2,Gtf3c2,Icam1,Ifnar1,Il1f5,Il4ra,Il6,Irf1,Irf2,Itga3,Itgb4,Lbr,Lpar4,Lsr,Mib1,Mmp9,Msh2,Nab1,Nab2,Nfkbia,Nkx2-5,Notch2,Ntf5,Orai1,Ovol1,Parp10,Pbx1,Pdx1,Pkd1,Plcd1,Pole,Polh,…	NA	NA	NA	NA	NA	NA	NA	NA	NA	NA	NA
Mouse Phenotype	abnormal spleen marginal zone morphology	0							2.61924e-62					Adam10,Apoe,Arhgdia,Arhgdib,Arhgef1,Arid3a,Bak1,Bax,Bcl10,Bcl3,Birc2,Birc3,Cd19,Cd22,Cd72,Cd79a,Cdkn2b,Cflar,Chuk,Cxcr7,Dll1,Dock2,Dock8,Dtx1,Fli1,Foxo1,Gimap1,Git2,Gna13,H2-Ab1,Inpp5d,Irf8,Lta,Ltb,Lyn,Maml1,Mfng,Nfkbia,Notch2,Prkcd,Prkcz,Pten,Ptpn6,Rac2,Rgs1,Sharpin,Siglec1,Srf,Stk4,Tcf3,Tec,Tlr7,Tlr8,Tnf,Tnfrsf13c,Traf2,Vav1,Vav2,Vav3	NA	NA	NA	NA	NA	NA	Bach2,Cdkn2b,Dock8,Fli1,Gimap1,Lta,Ltb,Lyn,Nfkbia,Rgs1,Tec,Tlr7,Tlr8,Tnf	NA	NA	NA	NA
Mouse Phenotype	abnormal spleen morphology	0	0	0					6.37753e-198	0		0		Ada,Adam10,Adam17,Agpat2,Apc,Apoe,Arhgdia,Arhgdib,Arhgef1,Arid3a,Asb1,Axl,B2m,B4galt1,BC096441,Bag4,Bak1,Bax,Bcl10,Bcl3,Becn1,Bik,Bin3,Birc2,Birc3,Braf,Brca2,C4b,Cacna1a,Capn10,Cbfa2t3,Ccnd1,Ccr2,Ccr7,Cd19,Cd22,Cd247,Cd24a,Cd28,Cd34,Cd3g,Cd72,Cd79a,Cd80,Cd84,Cdkn1b,Cdkn2a,Cdkn2b,Cebpa,Cebpb,Cfc1,Cflar,Chd2,Chuk,Cks1b,Col10a1,Csf1,Csf1r,Ctsa,Cxcr2,Cxcr7,Dbnl,Dck,Def6,Diap1,Dll1,Dnase1,Dock2,Dock8,…	Add2,Arhgdia,Bbc3,Birc2,Birc3,Cacna1a,Cd47,Cd84,Csf1,Dnase1,Egln3,Eif2c2,Ets1,Fli1,Fos,Gna12,Hfe,Hfe2,Hmox1,Hsh2d,Ikzf1,Inpp5d,Lmna,Lta,Ltb,Map3k3,Mcm2,Me2,Mll5,Msi2,Mt1,Mt2,Nfe2l2,Notch2,Nr4a1,Pecam1,Pik3c2a,Ppia,Ppp2r3c,Ppt1,Prkcq,Prss16,Psen1,Pstpip2,Ptprj,Rhoh,Runx1,Rxra,Sfpi1,Sgsh,Sharpin,Siglec1,Slc11a1,Slc19a1,Slc37a4,Src,Tcf3,Tgfbr2,Tk1,Tlr9,Tnf,Tns3,Ubash3a,Unc13d,Zfp36,Zfp36l2,Zfpm1	Abca1,Abcc4,Ada,Adam10,Add2,Agpat2,Alox5,Apcs,Arid3a,Arid4b,Arntl,Asxl1,Axl,B2m,B4galt1,BC096441,Bag4,Bank1,Bcl10,Becn1,Bik,Birc2,Birc3,Blk,Bnip3l,C3,C4b,Cbfa2t3,Cbl,Ccr2,Ccr7,Cd19,Cd247,Cd24a,Cd40lg,Cd47,Cd80,Cdkn1b,Cebpb,Cfc1,Cideb,Cited2,Col10a1,Ctla4,Ctsd,Ctsg,Dck,Diap1,Dkc1,Dnase1,Drosha,Dtx1,E2f2,Egr1,Eif2c2,Epb4.2,Epor,Esr2,Ewsr1,Exoc6,Fads2,Fasl,Fcgr2b,Fech,Fen1,Flt3,Fntb,Foxo3,Foxp3,Fxr1…	NA	NA	NA	NA	Agpat2,Bach2,Cd84,Cdkn2a,Cdkn2b,Cebpb,Dock8,E2f2,Egln3,Elk4,Ets1,Fads2,Fli1,Flt3,Gimap1,Gimap5,Hbb-b1,Hmga1,Hsh2d,Ikzf1,Itgb3,Klhl6,Lta,Ltb,Lyn,Mafk,Mdc1,Mdm4,Nfkbia,Notch1,Plcg2,Prkcq,Psap,Rgs1,Slc2a10,Socs1,Tec,Tlr7,Tlr8,Tnf,Tom1l2,Ubash3a,Zc3h12a,Zfp36l1,Zfp36l2	Add2,B2m,B4galt1,Bcl10,Bik,Birc2,Birc3,Cbfa2t3,Cd24a,Cd47,Crh,Cul4a,Dnase2a,Egr1,Eif2c2,Epb4.2,Fads2,Fech,Fen1,Fntb,Foxo3,Gata1,Gfi1b,Hbb-b1,Hfe,Hk1,Hyal2,Ifnar1,Ikzf1,Il10rb,Il2rb,Kcnn4,Klf1,Klf13,Lass1,Lat2,Lyve1,Mafk,Mdc1,Mdm2,Mxi1,Myc,Nhej1,Nkx3-1,Pcid2,Pfdn1,Phc1,Pklr,Ppm1d,Ppp2r3c,Prkaa1,Prkcd,Rhoh,Rnf8,Rxra,S1pr2,Sac3d1,Sipa1,Slc19a1,Slc20a1,Slc25a37,Slc40a1,Slc4a1,Spna1,Spnb1,Stk11,Tcf3,T…	NA	Abca1,Abcc4,Ada,Add2,Agpat2,Alox5,Apoe,Arhgap1,Arhgdib,Arid4a,Arid4b,Arntl,Asb1,Atm,Axl,B2m,B4galt1,BC096441,Bak1,Bax,Bcl10,Bcl2l11,Becn1,Bik,Birc2,Birc3,C5ar1,Cacna1a,Cbfa2t3,Cbl,Ccne1,Ccr2,Ccr7,Cd19,Cd247,Cd24a,Cd40lg,Cd47,Cd72,Cdc73,Cdkn1b,Cebpb,Cflar,Chd2,Chd4,Cideb,Cited2,Cks1b,Csf1,Ctsd,Ctsg,Cyp1a2,Def6,Diap1,Dicer1,Dkc1,Dok1,Drosha,Dtx1,E2f2,Egln3,Egr1,Eif2c2,Elf1,Ercc1,Esr2,Ets1,Ewsr1,Exo…	NA
Mouse Phenotype	abnormal spleen red pulp morphology	0										0		Ada,Adam17,Bak1,Bax,Bcl3,Cacna1a,Ccr7,Cd19,Cd79a,Cdkn2a,Cebpb,Cflar,Chd2,Col10a1,Csf1,Ets1,Flt3,Gem,Ggt1,Hk1,Ifnar1,Ikzf1,Irf8,Itch,Ltb,Lyn,Mll1,Mllt1,Myb,Ncoa3,Ncstn,Notch1,Notch2,Notch3,Pfdn1,Rassf5,Relb,Runx1,Sele,Sell,Selp,Sfpi1,Socs1,Sos1,Tcf3,Tnf,Tpp2,Trp53,Ttc7,Vdr,Vhl,Zfpm1	NA	NA	NA	NA	NA	NA	NA	NA	NA	Abcc4,Ada,Bak1,Bax,Bcl2l11,Cacna1a,Cbl,Ccne1,Ccr7,Cd19,Cebpb,Cflar,Chd2,Csf1,Dkc1,Ets1,Fads2,Flt3,Gata1,Gem,Hbb-b1,Hk1,Hp,Id1,Ifnar1,Ikzf1,Irf8,Itgb2,Lamp2,Man2b1,Mapt,Myb,Ncoa3,Ncstn,Nkx3-1,Notch1,Notch3,Pfdn1,Prkag1,Relb,Runx1,Sfpi1,Slc11a2,Socs1,Tcf3,Tet2,Vhl,Zfpm1	NA
Mouse Phenotype	abnormal spleen size	0		0					5.1548e-161	0		0		Ada,Adam17,Agpat2,Apc,Apoe,Arhgdia,Arhgdib,Arhgef1,Asb1,Axl,B2m,B4galt1,BC096441,Bag4,Bak1,Bax,Bik,Bin3,Birc2,Birc3,Braf,Brca2,C4b,Capn10,Cbfa2t3,Ccnd1,Ccr2,Ccr7,Cd19,Cd247,Cd3g,Cdkn1b,Cdkn2a,Cdkn2b,Cebpa,Cebpb,Cfc1,Cflar,Chd2,Cks1b,Col10a1,Csf1r,Ctsa,Cxcr2,Dbnl,Dck,Def6,Diap1,Dnase1,Dock2,Dok2,Dtx1,Dusp6,E2f2,Eef1a2,Egr1,Eif2c2,Elavl1,Erap1,Ercc1,Ets1,Ewsr1,Exoc6,Fadd,Fasl,Fcer1g,Fcgr2b,Fech,Fli…	NA	Abca1,Abcc4,Ada,Add2,Agpat2,Alox5,Arid4b,Arntl,Asxl1,Axl,B2m,B4galt1,BC096441,Bag4,Bik,Birc2,Birc3,Blk,Bnip3l,C3,C4b,Cbfa2t3,Cbl,Ccr2,Ccr7,Cd19,Cd247,Cd47,Cdkn1b,Cebpb,Cfc1,Cideb,Cited2,Col10a1,Ctla4,Ctsg,Dck,Diap1,Dkc1,Dnase1,Drosha,Dtx1,E2f2,Egr1,Eif2c2,Epb4.2,Epor,Esr2,Ewsr1,Exoc6,Fads2,Fasl,Fcgr2b,Fech,Fen1,Flt3,Fntb,Foxo3,Foxp3,Fxr1,Fyn,Gata1,Git2,Gpc3,Hbb-b1,Hsh2d,Ifnar1,Igf2bp1,Ikzf1,Il10r…	NA	NA	NA	NA	Agpat2,Bach2,Cdkn2a,Cdkn2b,Cebpb,E2f2,Egln3,Ets1,Fads2,Fli1,Flt3,Gimap5,Hbb-b1,Hmga1,Hsh2d,Ikzf1,Itgb3,Klhl6,Lta,Ltb,Lyn,Mafk,Mdc1,Mdm4,Nfkbia,Notch1,Plcg2,Prkcq,Psap,Tec,Tlr8,Tnf,Tom1l2,Zc3h12a,Zfp36l1,Zfp36l2	Add2,B2m,B4galt1,Bik,Birc2,Birc3,Cbfa2t3,Cd47,Cul4a,Dnase2a,Egr1,Eif2c2,Epb4.2,Fads2,Fech,Fen1,Fntb,Foxo3,Gata1,Hbb-b1,Hk1,Ifnar1,Ikzf1,Il10rb,Il2rb,Kcnn4,Klf1,Klf13,Lat2,Mafk,Mdc1,Mdm2,Mxi1,Myc,Nhej1,Nkx3-1,Pcid2,Pfdn1,Phc1,Pklr,Ppm1d,Ppp2r3c,Prkaa1,Prkcd,Rhoh,Rxra,Sac3d1,Sipa1,Slc19a1,Slc20a1,Slc25a37,Slc40a1,Slc4a1,Spna1,Spnb1,Stk11,Tcf3,Tmprss6,Trp53,Tspan33	NA	Abca1,Abcc4,Ada,Add2,Agpat2,Alox5,Apoe,Arhgap1,Arhgdib,Arid4a,Arid4b,Arntl,Asb1,Atm,Axl,B2m,B4galt1,BC096441,Bak1,Bax,Bcl2l11,Bik,Birc2,Birc3,Cbfa2t3,Cbl,Ccne1,Ccr2,Ccr7,Cd19,Cd247,Cd47,Cdc73,Cdkn1b,Cebpb,Cflar,Chd2,Chd4,Cideb,Cited2,Cks1b,Ctsg,Cyp1a2,Def6,Diap1,Dicer1,Dkc1,Dok1,Drosha,Dtx1,E2f2,Egln3,Egr1,Eif2c2,Ercc1,Esr2,Ets1,Ewsr1,Exoc6,Fadd,Fads2,Fasl,Fcgr2b,Fech,Fli1,Flt3,Flt3l,Fntb,Foxh1,F…	NA
Mouse Phenotype	abnormal spleen white pulp morphology	0		0					5.36777e-109					Adam10,Apoe,Arhgdia,Arhgdib,Arhgef1,Arid3a,BC096441,Bak1,Bax,Bcl10,Bcl3,Becn1,Birc2,Birc3,C4b,Ccr7,Cd19,Cd22,Cd28,Cd72,Cd79a,Cd84,Cdkn2a,Cdkn2b,Cebpb,Cflar,Chuk,Cxcr2,Cxcr7,Dck,Def6,Diap1,Dll1,Dock2,Dock8,Dtx1,E2f2,Fcamr,Fli1,Flt3,Fos,Foxo1,Gabpb2,Gimap1,Gimap5,Git2,Gna13,Grb2,H2-Ab1,Ikzf1,Il5ra,Inpp5d,Irf8,Lat,Lta,Ltb,Lyn,Maml1,Mapkapk2,Mcm3ap,Mfge8,Mfng,Mll1,Mllt1,Myb,Ncoa3,Nfkbia,Notch2,Pfdn1,…	NA	Abcc4,Adam10,Apcs,Arid3a,BC096441,Bank1,Bcl10,Becn1,Birc2,Birc3,C3,C4b,Ccr7,Cd19,Cd40lg,Cebpb,Ctsd,Dck,Diap1,Dkc1,Dtx1,E2f2,Fads2,Fen1,Flt3,Foxp3,Fyn,Gata1,Git2,Gpc3,Grb2,Hbb-b1,Icos,Id1,Ikzf1,Il2rb,Il2rg,Inpp5d,Lamp2,Lat,Malt1,Map3k14,Mcm3ap,Mfng,Msr1,Myb,Ncoa3,Nfkb1,Pfdn1,Ppp2r3c,Ptpn6,Rac2,Rag1,Rgs1,Runx1,S1pr2,Sash3,Sema4d,Sfpi1,Siae,Spen,Stim1,Stim2,Stk4,Tec,Tlr7,Tlr8,Tnfrsf13c,Tnfsf14,Tom1l…	NA	NA	NA	NA	Bach2,Cd84,Cdkn2a,Cdkn2b,Cebpb,Dock8,E2f2,Fads2,Fli1,Flt3,Gimap1,Gimap5,Hbb-b1,Ikzf1,Lta,Ltb,Lyn,Nfkbia,Rgs1,Socs1,Tec,Tlr7,Tlr8,Tnf,Tom1l2	NA	NA	NA	NA
Mouse Phenotype	abnormal survival	0										0		2010111I01Rik,2700078K21Rik,6230427J02Rik,6720456B07Rik,AI848100,Abce1,Abi1,Acadl,Acadm,Acan,Acd,Ace,Acly,Actg1,Actn4,Acvr1b,Ada,Adam10,Adam15,Adam17,Adam23,Adam9,Adamts13,Adamts20,Adipoq,Adra2b,Adrbk1,Aes,Aff1,Afmid,Agpat2,Agps,Agrp,Agt,Agtr1b,Aimp2,Akap10,Akap8,Akt1,Akt3,Alas1,Aldh1a1,Aldh5a1,Als2,Alx4,Amd2,Amhr2,Amn,Amot,Angptl4,Angptl6,Ank,Ank3,Ankrd11,Anp32e,Ap1m1,Ap3d1,Apaf1,Apbb2,Apc,Apoa4…	NA	NA	NA	NA	NA	NA	NA	NA	NA	2700049A03Rik,2700078K21Rik,6720456B07Rik,AI848100,Abca1,Abcc9,Abhd5,Acaca,Acd,Ace,Aco1,Acss1,Acta1,Actg1,Actl6b,Actn4,Ada,Adam19,Adam9,Add1,Adm,Adrb1,Aes,Aff1,Afg3l2,Afmid,Agpat2,Agrp,Agtr1b,Ahi1,Aimp2,Aip,Akt1,Alas2,Als2,Angpt1,Angptl4,Angptl6,Ank,Ankrd11,Anp32a,Anp32b,Anp32e,Ap1m1,Apoa4,Apoe,Aprt,Aqp1,Aqp11,Ar,Arf6,Arhgap1,Arhgap6,Arhgdib,Arid4a,Arid4b,Arl13b,Arntl,Arrb1,Art4,Arx,Asph,Atf6,Atg…	NA
Mouse Phenotype	abnormal T cell activation	0		0					8.26538e-108			0		Abi1,Appl1,Arhgdia,Arhgdib,Arhgef1,Axl,B2m,BC096441,Bcl10,Ccl5,Ccr2,Ccr5,Cd19,Cd247,Cd28,Cd3g,Cd48,Cd74,Cd80,Cd81,Cd83,Cdkn1b,Cry2,Dbnl,Diap1,Dtx1,E2f2,Elavl1,Elf1,Erap1,Ets1,Fadd,Fasl,Fbxo30,Fcer1g,Foxo1,Gadd45b,Gem,Gna13,Gnai2,Gpr132,Grap,H2-Ab1,H2-D1,Hrh1,Hsh2d,Ikzf1,Il12rb2,Il21r,Il2ra,Il4ra,Il6st,Impdh1,Impdh2,Irf1,Itgam,Itpkb,Ksr1,Laptm5,Lat,Lat2,Lepr,Ly9,Map3k2,Map3k3,Map4k1,Mapk14,March7,…	NA	Abi1,Arhgef12,Arhgef6,Axl,B2m,B3gnt2,BC096441,Bcl10,C3,Cbl,Ccr2,Ccr5,Cd19,Cd247,Cd276,Cd80,Cd81,Cdkn1b,Crlf2,Cry2,Csf2rb,Csf2rb2,Ctla4,Diap1,Drosha,Dtx1,E2f1,E2f2,Fasl,Fbxo30,Foxo3,Foxp3,Fyb,Fyn,Gadd45a,Gfi1,Gmnn,Hrh1,Hsh2d,Icos,Ikzf1,Il21r,Il2rb,Il2rg,Il4,Il4ra,Irf1,Itgb2,Itpkb,Ksr1,Laptm5,Lat,Lat2,Lcp2,Lepr,Malt1,Map3k14,Map3k3,Mapk14,March7,Mbp,Myc,Ncoa3,Nedd4,Nfkb1,Nos2,Nup98,Pawr,Pdcd1lg2,Pf…	NA	NA	NA	NA	B3gnt2,Ccl5,Cd276,Cd48,E2f2,Ets1,Fyb,H2-D1,Hsh2d,Ikzf1,Il21r,Il4ra,Itpkb,Ksr1,Ly9,Nfkbia,Nos2,Prkcq,Socs1,Stat1,Stat4,Sucnr1,Txnip,Ubash3a	NA	NA	Arhgdib,Arhgef12,Arhgef6,Axl,B2m,B3gnt2,BC096441,Bcl10,Cbl,Ccr2,Ccr5,Cd19,Cd226,Cd247,Cd276,Cdkn1b,Chd4,Cry2,Csf2rb,Csf2rb2,Diap1,Dicer1,Dok1,Drosha,Dtx1,E2f2,Elf1,Ets1,Fadd,Fasl,Foxo3,Fyb,Gadd45a,Gadd45b,Gem,Gfi1,Gna13,Gnai2,Grap,H2-Ab1,Hr,Hrh1,Hsh2d,Ikzf1,Ikzf3,Il12rb2,Il21r,Il2rb,Il4,Il4ra,Il7r,Impdh1,Impdh2,Itgb2,Itk,Ksr1,Laptm5,Lat,Lcp2,Lep,Lepr,Lif,Ly6a,Map3k3,Map4k1,Mapk14,March7,Mbp,Mta2,…	NA
Mouse Phenotype	abnormal T cell differentiation	0		0					1.15709e-165			0		Abi1,Ada,Adam10,Aff1,Akt1,Akt3,Apc,Appl1,Arhgdia,Arhgdib,Arhgef1,Axl,B2m,B9d2,BC096441,Bak1,Batf,Bax,Bcl10,Bcl11a,Bik,Birc5,Braf,Carm1,Casp3,Ccl5,Ccr2,Ccr5,Cd19,Cd247,Cd28,Cd3d,Cd3e,Cd3g,Cd48,Cd5l,Cd74,Cd79a,Cd80,Cd81,Cd83,Cdkn1b,Cdkn2a,Clec4n,Col10a1,Cops5,Cpa3,Crip3,Cry2,Ctcf,Cxcr4,Dbnl,Dck,Dffb,Diap1,Dmtf1,Dock2,Dtx1,E2f2,Ebi3,Elavl1,Elf1,Elk4,Erap1,Ets1,Ewsr1,Fadd,Fasl,Fbxo30,Fcer1g,Fli1,Flt3…	NA	Abi1,Ada,Adam10,Aff1,Arhgef12,Arhgef6,Asxl1,Axl,B2m,B3gnt2,B9d2,BC096441,Bcl10,Bcl11a,Bik,Blk,C3,Casp3,Cbl,Ccr2,Ccr5,Cd19,Cd247,Cd276,Cd40lg,Cd80,Cd81,Cdkn1b,Clec4n,Col10a1,Cpa3,Crlf2,Cry2,Csf2rb,Csf2rb2,Ctcf,Ctla4,Ctsd,Dck,Dffb,Diap1,Dll4,Drosha,Dtx1,E2f1,E2f2,Ebi3,Esr2,Ewsr1,Fasl,Fbxo30,Flt3,Foxo3,Foxp3,Fyb,Fyn,Gadd45a,Gata3,Gfi1,Git2,Gmnn,Grap2,Grb2,Hrh1,Hsh2d,Icos,Id3,Ifngr2,Ikzf1,Il21r,Il2rb…	NA	NA	NA	NA	Akt1,B3gnt2,Bcl11a,Ccl5,Cd276,Cd48,Cdkn2a,E2f2,Elk4,Ets1,Fli1,Flt3,Fyb,Gimap1,Gimap5,H2-D1,Hivep3,Hsh2d,Id3,Ikzf1,Il21r,Il4ra,Itpkb,Klf2,Ksr1,Ly9,Nfkbia,Nos2,Notch1,Prkcq,Runx3,Slc46a2,Socs1,Stat1,Stat4,Sucnr1,Txnip,Ubash3a	NA	NA	Ada,Aff1,Akt1,Arhgdib,Arhgef12,Arhgef6,Atm,Axl,B2m,B3gnt2,B9d2,BC096441,Bak1,Bax,Bcl10,Bcl2l11,Bik,Birc5,C3ar1,Casp3,Cbl,Ccr2,Ccr5,Cd19,Cd226,Cd247,Cd276,Cd40lg,Cdkn1b,Chd4,Chek2,Clec4n,Cpa3,Cry2,Csf2rb,Csf2rb2,Csk,Ctcf,Ctsd,Ctse,Diap1,Dicer1,Dll4,Dok1,Drosha,Dtx1,E2f2,E2f4,Ebi3,Elf1,Esr2,Ets1,Ewsr1,Fadd,Fasl,Fli1,Flt3,Flt3l,Foxn1,Foxo3,Fyb,Gadd45a,Gadd45b,Gem,Gfi1,Git2,Gna13,Gnai2,Grap,Grap2,Grb…	NA
Mouse Phenotype	abnormal T cell morphology	0		0					1.86926e-221			0		Abi1,Ace,Ada,Adam10,Adam17,Aff1,Akt1,Akt3,Apc,Apoe,Appl1,Arhgdia,Arhgdib,Arhgef1,Axl,B2m,B9d2,BC096441,Bak1,Batf,Batf3,Bax,Bcl10,Bcl11a,Bik,Birc3,Birc5,Braf,Brca2,Carm1,Casp3,Ccl2,Ccl25,Ccl5,Ccnd1,Ccr10,Ccr2,Ccr4,Ccr5,Ccr7,Cd19,Cd247,Cd28,Cd3d,Cd3e,Cd3g,Cd44,Cd48,Cd5l,Cd74,Cd79a,Cd80,Cd81,Cd83,Cd84,Cdkn1b,Cdkn2a,Cflar,Chd2,Chst3,Clec4n,Col10a1,Cops5,Cpa3,Cr1l,Crip3,Cry2,Ctcf,Cxcl16,Cxcr4,Cyp27b1,…	NA	Abi1,Ace,Ada,Adam10,Aff1,Arhgef12,Arhgef6,Arid4b,Arntl,Asxl1,Axl,B2m,B3gnt2,B9d2,BC096441,Bcl10,Bcl11a,Bik,Birc3,Blk,C3,Casp3,Cbl,Ccr10,Ccr2,Ccr5,Ccr7,Cd19,Cd247,Cd274,Cd276,Cd40lg,Cd44,Cd47,Cd80,Cd81,Cdkn1b,Chi3l1,Chst3,Clec4n,Col10a1,Cpa3,Cr1l,Crlf2,Cry2,Csf2rb,Csf2rb2,Ctcf,Ctla4,Ctsd,Dck,Dffb,Diap1,Dll4,Drosha,Dtx1,E2f1,E2f2,Ebag9,Ebi3,Esr2,Ewsr1,Fasl,Fbxo30,Flt3,Foxo3,Foxp3,Fyb,Fyn,Gadd45a,Ga…	NA	NA	NA	NA	Akt1,B3gnt2,Bcl11a,Ccl5,Cd276,Cd48,Cd84,Cdkn2a,Chst3,Dock8,E2f2,Elk4,Ets1,Fli1,Flt3,Fyb,Gimap1,Gimap5,H2-D1,Hivep3,Hsh2d,Id3,Ier3,Ikzf1,Il21r,Il4ra,Irf2,Itpkb,Klf2,Ksr1,Lgals9,Lta,Ly9,Lyn,Myh9,Nfkbia,Nos2,Notch1,Prkcq,Runx3,Slc46a2,Socs1,Sp3,Stat1,Stat4,Sucnr1,Tnf,Tom1l2,Txnip,Ubash3a,Zc3h12a	NA	NA	Abcg1,Ace,Ada,Aff1,Akt1,Apoe,Arhgdib,Arhgef12,Arhgef6,Arid4a,Arid4b,Arntl,Atm,Axl,B2m,B3gnt2,B9d2,BC096441,Bak1,Batf3,Bax,Bcl10,Bcl2l11,Bik,Birc3,Birc5,C3ar1,Casp3,Cbl,Ccr10,Ccr2,Ccr5,Ccr7,Cd19,Cd226,Cd247,Cd274,Cd276,Cd40lg,Cd44,Cd47,Cdkn1b,Cds2,Cflar,Chd2,Chd4,Chek2,Chst3,Clec4n,Cpa3,Cry2,Csf2rb,Csf2rb2,Csk,Ctcf,Ctsd,Ctse,Ctsl,Def6,Diap1,Dicer1,Dll4,Dok1,Drosha,Dtx1,E2f2,E2f4,Ebag9,Ebi3,Elf1,Es…	NA
Mouse Phenotype	abnormal T cell number	0		0					4.37929e-184			0		Ace,Ada,Adam10,Adam17,Aff1,Akt1,Akt3,Apc,Apoe,Arhgdia,Arhgdib,B2m,B9d2,BC096441,Batf,Batf3,Bax,Bcl10,Bcl11a,Bik,Birc3,Birc5,Braf,Brca2,Casp3,Ccl2,Ccl25,Ccl5,Ccnd1,Ccr10,Ccr2,Ccr4,Ccr5,Ccr7,Cd19,Cd247,Cd28,Cd3d,Cd3e,Cd3g,Cd48,Cd5l,Cd74,Cd79a,Cd80,Cd83,Cd84,Cdkn1b,Cdkn2a,Cflar,Chd2,Chst3,Col10a1,Cops5,Cpa3,Cr1l,Crip3,Ctcf,Cxcl16,Cxcr4,Cyp27b1,Dck,Def6,Dffb,Diap1,Dll1,Dmtf1,Dntt,Dock2,Dock8,E2f2,Ebi…	NA	Ace,Ada,Adam10,Aff1,Arhgef6,Arid4b,Arntl,Asxl1,B2m,B9d2,BC096441,Bcl10,Bcl11a,Bik,Birc3,Blk,Casp3,Cbl,Ccr10,Ccr2,Ccr5,Ccr7,Cd19,Cd247,Cd274,Cd40lg,Cd47,Cd80,Cdkn1b,Chi3l1,Chst3,Col10a1,Cpa3,Cr1l,Crlf2,Ctcf,Ctla4,Ctsd,Dck,Dffb,Diap1,Dll4,Drosha,E2f1,E2f2,Ebi3,Esr2,Ewsr1,Fasl,Fbxo30,Flt3,Foxp3,Fyb,Fyn,Gadd45a,Galr2,Gata3,Gfi1,Git2,Gmnn,Grap2,Grb2,H2-K1,Hrh1,Icos,Id3,Ier3,Ikzf1,Il21r,Il2rb,Il2rg,Il4…	NA	NA	NA	NA	Akt1,Bcl11a,Ccl5,Cd48,Cd84,Cdkn2a,Chst3,Dock8,E2f2,Elk4,Ets1,Fli1,Flt3,Fyb,Gimap1,Gimap5,H2-D1,Hivep3,Id3,Ier3,Ikzf1,Il21r,Il4ra,Irf2,Itpkb,Klf2,Lgals9,Lta,Lyn,Myh9,Nfkbia,Nos2,Notch1,Prkcq,Runx3,Slc46a2,Socs1,Sp3,Stat1,Tnf,Tom1l2,Txnip,Zc3h12a	NA	NA	Abcg1,Ace,Ada,Aff1,Akt1,Apoe,Arhgdib,Arhgef6,Arid4a,Arid4b,Arntl,Atm,B2m,B9d2,BC096441,Batf3,Bax,Bcl10,Bcl2l11,Bik,Birc3,Birc5,Casp3,Cbl,Ccr10,Ccr2,Ccr5,Ccr7,Cd19,Cd247,Cd274,Cd40lg,Cd47,Cdkn1b,Cds2,Cflar,Chd2,Chd4,Chek2,Chst3,Cpa3,Csk,Ctcf,Ctsd,Ctse,Ctsl,Def6,Diap1,Dicer1,Dll4,Drosha,E2f2,E2f4,Ebi3,Esr2,Ets1,Ewsr1,Fadd,Fasl,Fli1,Flt3,Flt3l,Foxn1,Fyb,Gadd45a,Gadd45b,Galr2,Gem,Gfi1,Git2,Gna13,Gnai…	NA
Mouse Phenotype	abnormal T cell physiology	0		0					2.26251e-199			0		Abi1,Akt1,Akt3,Appl1,Arhgdia,Arhgdib,Arhgef1,Atf3,Axl,B2m,BC096441,Batf3,Bcl10,Bcl3,Birc3,Birc5,Braf,Brca2,Casp3,Casp9,Ccl1,Ccl2,Ccl5,Ccr2,Ccr5,Ccr7,Cd19,Cd247,Cd28,Cd38,Cd3e,Cd3g,Cd44,Cd48,Cd74,Cd80,Cd81,Cd83,Cd84,Cdkn1b,Cebpb,Chrm1,Cops5,Cry2,Ctsc,Cxcr2,Cyp11a1,Dbnl,Def6,Diap1,Dmtf1,Dock2,Dtx1,E2f2,Ebag9,Ecm1,Elavl1,Elf1,Erap1,Ets1,Fadd,Faim3,Fasl,Fbxo30,Fcer1g,Foxn1,Foxo1,Gadd45b,Gem,Gimap1,Gi…	NA	Abi1,Arhgef12,Arhgef6,Axl,B2m,B3gnt2,BC096441,Bcl10,Birc3,C3,Casp3,Cbl,Ccr2,Ccr5,Ccr7,Ccrl2,Cd19,Cd247,Cd274,Cd276,Cd38,Cd40lg,Cd44,Cd80,Cd81,Cdkn1b,Cebpb,Chi3l1,Chrm1,Cops6,Crlf2,Cry2,Csf2rb,Csf2rb2,Ctla4,Ctsc,Diap1,Drosha,Dtx1,E2f1,E2f2,Ebag9,Ecm1,Fasl,Fbxo30,Foxo3,Foxp3,Fyb,Fyn,Gadd45a,Gata3,Gfi1,Git2,Gmnn,Gzmb,H2-K1,Hrh1,Hsh2d,Icam1,Icos,Id3,Ier3,Ifnar1,Ifnar2,Ifngr2,Ikzf1,Ikzf2,Il21r,Il2rb,I…	NA	NA	NA	NA	Akt1,B3gnt2,Ccl5,Cd276,Cd48,Cd84,Cebpb,Ctsc,E2f2,Ets1,Fyb,Gimap1,Gimap4,Gimap5,H2-D1,Hsh2d,Id3,Ier3,Ikzf1,Il12a,Il21r,Il4ra,Il6ra,Itpkb,Ksr1,Ly9,Mbtps1,Mdm4,Myh9,Nfkbia,Nos2,Notch1,Panx1,Prkcq,Rab27a,Slamf1,Slamf6,Slc46a2,Socs1,Stat1,Stat4,Sucnr1,Tnf,Txnip,Ubash3a	NA	NA	Akt1,Arhgdib,Arhgef12,Arhgef6,Atf3,Atm,Axl,B2m,B3gnt2,BC096441,Batf3,Bcl10,Bcl2l11,Birc3,Birc5,C3ar1,Casp1,Casp3,Casp7,Casp9,Cbl,Ccr2,Ccr5,Ccr7,Ccrl2,Cd19,Cd226,Cd247,Cd274,Cd276,Cd40lg,Cd44,Cdkn1b,Cebpb,Chd4,Chrm1,Cry2,Csf2rb,Csf2rb2,Ctss,Def6,Diap1,Dicer1,Dok1,Drosha,Dtx1,E2f2,Ebag9,Ecm1,Elf1,Ets1,Fadd,Fasl,Foxn1,Foxo3,Fyb,Gadd45a,Gadd45b,Gem,Gfi1,Git2,Gna13,Gnai2,Gnai3,Grap,Grk6,Gzmb,H2-Ab1,H2…	NA
Mouse Phenotype	abnormal T cell proliferation	0		0							2.63673e-74	0		Abi1,Appl1,Arhgdia,Arhgdib,Arhgef1,Axl,B2m,BC096441,Bcl10,Ccl5,Ccr2,Ccr5,Cd19,Cd247,Cd28,Cd3g,Cd48,Cd74,Cd80,Cd81,Cd83,Cdkn1b,Dbnl,Diap1,Dtx1,E2f2,Elf1,Erap1,Ets1,Fadd,Fasl,Fcer1g,Foxo1,Gadd45b,Gem,Gna13,Gnai2,Gpr132,Grap,Hrh1,Hsh2d,Ikzf1,Il21r,Il4ra,Impdh1,Impdh2,Irf1,Itgam,Ksr1,Laptm5,Lat,Lat2,Lepr,Ly9,Map3k2,Map3k3,Map4k1,Mapk14,March7,Mmp9,Mog,Mta2,Ncoa3,Nfkbia,Nfkbid,Nos2,Pawr,Pdcd1,Pdcd1lg2…	NA	Abi1,Arhgef12,Arhgef6,Axl,B2m,B3gnt2,BC096441,Bcl10,C3,Cbl,Ccr2,Ccr5,Cd19,Cd247,Cd276,Cd80,Cd81,Cdkn1b,Crlf2,Csf2rb,Csf2rb2,Ctla4,Diap1,Dtx1,E2f1,E2f2,Fasl,Foxo3,Foxp3,Fyb,Fyn,Gadd45a,Gfi1,Gmnn,Hrh1,Hsh2d,Icos,Ikzf1,Il21r,Il2rb,Il2rg,Il4,Il4ra,Irf1,Itgb2,Ksr1,Laptm5,Lat,Lat2,Lcp2,Lepr,Malt1,Map3k3,Mapk14,March7,Mbp,Myc,Ncoa3,Nedd4,Nfkb1,Nos2,Nup98,Pawr,Pdcd1lg2,Pim1,Pim2,Plau,Plxna1,Ppm1d,Ppp3ca,…	NA	NA	NA	NA	NA	NA	Ccr2,Ccr5,Csf2rb,Csf2rb2,E2f2,Fasl,Il2rb,Ksr1,Nos2,Pim2,Ptpn22,Rap1a,Sh2d2a,Spna1,Sucnr1,Tnfrsf13c,Tspan32	Arhgdib,Arhgef12,Arhgef6,Axl,B2m,B3gnt2,BC096441,Bcl10,Cbl,Ccr2,Ccr5,Cd19,Cd226,Cd247,Cd276,Cdkn1b,Chd4,Csf2rb,Csf2rb2,Diap1,Dicer1,Dok1,Dtx1,E2f2,Elf1,Ets1,Fadd,Fasl,Foxo3,Fyb,Gadd45a,Gadd45b,Gem,Gfi1,Gna13,Gnai2,Grap,Hr,Hrh1,Hsh2d,Ikzf1,Ikzf3,Il21r,Il2rb,Il4,Il4ra,Il7r,Impdh1,Impdh2,Itgb2,Itk,Ksr1,Laptm5,Lat,Lcp2,Lep,Lepr,Lif,Ly6a,Map3k3,Map4k1,Mapk14,March7,Mbp,Mta2,Myc,Ncoa3,Nedd4,Nfkb1,Nos2,…	NA
Mouse Phenotype	abnormal thymus morphology	0		0								0		Ada,Adam10,Aff1,Akt1,Akt3,Apc,Apoe,Arhgdia,Arhgdib,Atcay,Bag4,Bax,Bcl10,Bcl11a,Birc5,Braf,Brca2,Cacna1a,Cap1,Carm1,Casp3,Ccnd1,Ccr7,Cd247,Cd3d,Cd3e,Cd3g,Cd5l,Cdkn1b,Cdkn2a,Cflar,Clk1,Col10a1,Cops5,Cpa3,Crip3,Csf1,Ctcf,Cxcr2,Cxcr4,Dad1,Dck,Dffb,Dmtf1,Dok2,E2f2,Eef1a2,Elavl1,Elk4,Erap1,Errfi1,Ets1,Ewsr1,Fadd,Fasl,Fbln1,Fbxo30,Fcer1g,Fgfr2,Fli1,Flt3,Fos,Foxn1,Gbx2,Gem,Gimap1,Gimap5,Gna13,Gnai2,Grap2…	NA	Abca1,Abcc4,Ada,Adam10,Aff1,Asxl1,Atg5,Bag4,Bcl10,Bcl11a,Cacna2d2,Cap1,Casp3,Cbl,Ccr7,Cd247,Cdkn1b,Col10a1,Cpa3,Crlf2,Ctcf,Ctla4,Ctsd,Dad1,Dck,Dffb,Dll4,Drosha,E2f1,E2f2,Esr2,Ewsr1,Fads2,Fasl,Fbxo30,Fen1,Flt3,Foxp3,Fyb,Fyn,Gadd45a,Gata3,Gfi1,Gmnn,Grap2,Grb2,Hist1h1c,Hist1h1d,Hist1h1e,Icam1,Id1,Ikzf1,Il2rb,Il2rg,Inpp5d,Irf1,Itpkb,Jak1,Kiss1r,Kit,Klf13,Lamp2,Lat,Lcp2,Map3k14,Map3k3,Mcl1,Mdc1,Mdm2,M…	NA	NA	NA	NA	NA	NA	NA	Abca1,Abcc4,Ada,Aff1,Akt1,Apoe,Ar,Arhgap1,Arhgdib,Atm,Bax,Bcl10,Bcl2l11,Birc5,Cacna1a,Cacna2d2,Cap1,Casp3,Cbl,Ccr7,Cd247,Cdkn1b,Cflar,Chd4,Cpa3,Csf1,Csk,Ctcf,Ctsd,Ctsl,Cyp1a2,Dad1,Dicer1,Dll4,Dok1,Drosha,E2f2,E2f4,Esr2,Ets1,Ewsr1,Fadd,Fads2,Fasl,Fgf8,Fli1,Flt3,Foxn1,Fyb,Gadd45a,Gem,Gfi1,Gna13,Gnai2,Grap2,Grb2,H2-Aa,Hand2,Hist1h1c,Hist1h1d,Hist1h1e,Hr,Htra2,Id1,Ikzf1,Il2rb,Il7r,Inpp5d,Itk,Jak1,Klf…	NA
Mouse Phenotype	abnormal thymus size	0		0								0		Ada,Adam10,Aff1,Akt1,Akt3,Apc,Apoe,Bag4,Bcl11a,Birc5,Braf,Brca2,Cacna1a,Carm1,Ccnd1,Cd247,Cd3d,Cd3e,Cd3g,Cdkn1b,Cdkn2a,Clk1,Col10a1,Cpa3,Crip3,Ctcf,Cxcr2,Dad1,Dck,Dffb,Dok2,E2f2,Eef1a2,Elavl1,Erap1,Errfi1,Ets1,Ewsr1,Fadd,Fasl,Fbln1,Fbxo30,Flt3,Fos,Foxn1,Gimap5,Gna13,H2-Aa,Hist1h1c,Hist1h1d,Hist1h1e,Icam1,Ikzf1,Il6st,Inpp5d,Jak1,Kiss1r,Kit,Klf13,Lat,Lmna,Mcl1,Mdc1,Mdm4,Mll5,Msi2,Myb,Nfkbia,Nhej1,N…	NA	Ada,Adam10,Aff1,Bag4,Bcl11a,Cacna2d2,Cbl,Cd247,Cdkn1b,Col10a1,Cpa3,Crlf2,Ctcf,Ctsd,Dad1,Dck,Dffb,Dll4,E2f1,E2f2,Esr2,Ewsr1,Fads2,Fasl,Fbxo30,Fen1,Flt3,Foxp3,Fyn,Gadd45a,Gata3,Gfi1,Hist1h1c,Hist1h1d,Hist1h1e,Icam1,Ikzf1,Il2rb,Il2rg,Inpp5d,Jak1,Kiss1r,Kit,Klf13,Lat,Lcp2,Map3k14,Mcl1,Mdc1,Mdm2,Mesp1,Mll5,Msi2,Myb,Nbn,Ncor1,Nfatc3,Nfkb1,Nhej1,Nkx2-5,Notch1,Pcsk5,Pfdn1,Ppm1d,Ppp3r1,Ptcra,Ptpn6,Rag1,Rh…	NA	NA	NA	NA	NA	NA	NA	Ada,Aff1,Akt1,Apoe,Ar,Arhgap1,Atm,Birc5,Cacna1a,Cacna2d2,Cbl,Cd247,Cdkn1b,Chd4,Cpa3,Csk,Ctcf,Ctsd,Ctsl,Cyp1a2,Dad1,Dll4,Dok1,E2f2,E2f4,Esr2,Ets1,Ewsr1,Fadd,Fads2,Fasl,Fgf8,Flt3,Foxn1,Gadd45a,Gfi1,Gna13,H2-Aa,Hist1h1c,Hist1h1d,Hist1h1e,Hr,Htra2,Ikzf1,Il2rb,Il7r,Inpp5d,Jak1,Klf13,Lat,Lcp2,Mcl1,Mdc1,Mdm4,Msi2,Myb,Ncor1,Nfatc3,Nfkb1,Nhej1,Nkx2-5,Notch1,Notch3,Pbx1,Pfdn1,Plcg1,Pold1,Prnp,Ptcra,Ptk2,Pt…	NA
Mouse Phenotype	abnormal tumor incidence	0										0		1190003J15Rik,2700078K21Rik,Abcb4,Adipoq,Aes,Akt1,Akt3,Amh,Amhr2,Apc,Asph,Atp2a2,Aurkb,B2m,Bag1,Bard1,Bax,Becn1,Bin3,Braf,Brca2,Casc1,Ccl2,Ccnd1,Cd19,Cd34,Cd44,Cdk11b,Cdk4,Cdkn1b,Cdkn2a,Cdkn2b,Cdsn,Cdx2,Cebpa,Cebpb,Chd2,Chek1,Chuk,Cks1b,Ctnnb1,Cul9,Cxcr3,Cxcr6,Cytip,Dgkd,Dmtf1,Dnd1,Dok2,Eef1a1,Egr1,Erbb3,Ercc1,Errfi1,Esam,Ets2,Ewsr1,F2r,F3,Fasl,Fbxo30,Fgfr2,Flcn,Fli1,Fos,Foxm1,Foxn1,Foxo1,Fshr,Ga…	NA	NA	NA	NA	NA	NA	NA	NA	NA	2700078K21Rik,Abcb4,Aes,Aip,Akt1,Amelx,Ar,Arid4a,Arid4b,Asph,Atm,Aurkb,B2m,Bax,Becn1,Blm,Cd19,Cd226,Cd44,Cd47,Cdkn1b,Cdx2,Cebpb,Chd2,Chek2,Cks1b,Ctsg,Cxcr6,Cygb,Cyp1a2,Dek,Dicer1,Dkc1,Dnd1,Dok1,Dok3,Dph1,E2f4,Egr1,Eif4e,Erbb2,Erbb3,Ercc1,Esam,Esr2,Ets2,Ewsr1,F2r,Fasl,Fgf2,Fli1,Fntb,Foxn1,Foxo3,Fzr1,Gadd45a,Gast,Ggta1,Gli1,Gnai2,Gnmt,Gprc5a,Grb2,Gstp1,Gstp2,H2afx,Hic1,Hivep3,Hmga1,Hmmr,Hp,Hr,Hspa5…	NA
Mouse Phenotype	abnormal tumor necrosis factor level	0												Adam17,Adora2b,Arrb2,Axl,B2m,Cbs,Ccl2,Ccl3,Ccr2,Cd19,Cd44,Clic4,Cpb2,Cry2,Csf1,Egr1,F3,Fasl,Flt3,Fos,Foxn1,Hexb,Icam1,Ier3,Ifnar1,Ifngr1,Il10ra,Il10rb,Il6,Il6ra,Irak2,Itgav,Lta,Mapkapk2,Mbl2,Myd88,Ncoa3,Nfe2l2,Nfkbia,Nr3c1,Parp1,Pglyrp2,Pilrb1,Prkce,Ramp1,Relb,Runx3,Slamf6,Tbk1,Tnf,Tradd,Traf2,Trem2,Trp53,Tyro3,Vdr	NA	NA	NA	NA	NA	NA	NA	NA	NA	NA	NA
Mouse Phenotype	abnormal tumor necrosis factor secretion	0										0		2610301G19Rik,Adora2b,Apoe,Arrb2,B2m,Birc3,Card9,Ccr1,Ccr2,Ccr4,Cd19,Cd44,Cd80,Clec4e,Clec4n,Clic4,Cnpy3,Cry2,Dusp4,Fcer1g,Fos,Gimap5,Gnai2,H2-Ab1,Hif1a,Ier3,Ifngr1,Il10rb,Irak2,Lgals3,Lgals3bp,Lta,Map4k1,Map4k2,Mapk14,Mapkapk2,Mgat5,Mmp9,Mt1,Mt2,Myd88,Ncoa3,Pde4b,Pigr,Pilrb1,Pla2g4a,Pomc,Prf1,Prkce,Ptgs2,Rasgrf2,Selk,Sit1,Sla2,Slc15a4,Stat1,Stk17b,Sykb,Tank,Tax1bp1,Tbk1,Tlr7,Tlr9,Tnf,Tollip,Traf…	NA	NA	NA	NA	NA	NA	NA	NA	NA	Adora3,Apoe,B2m,B3gnt2,Birc3,Casp1,Ccr1,Ccr2,Cd19,Cd200r1,Cd44,Clec4e,Clec4n,Clic4,Cnpy3,Cry2,Gfi1,Gnai1,Gnai2,Gnai3,H2-Ab1,Ier3,Il10rb,Il1b,Irak2,Irak3,Lgmn,Map4k1,Map4k2,Mapk14,Mapkapk2,Mt1,Mt2,Myd88,Ncoa3,Nfkb1,Prkce,Rabgef1,Rps6ka4,Sash3,Sit1,Sla2,Stat3,Tbk1,Tbx21,Timp3,Tnfrsf14,Tnfrsf1a,Tollip,Trafd1,Treml1,Vav1,Vav2,Vav3	NA
Mouse Phenotype	absent lymphocyte	0												Adam10,B2m,Batf,Bcl11a,Ccnd1,Cd19,Cd247,Cd3d,Cd3e,Cd3g,Cd79a,Dll1,Ets1,Fcer1g,Foxn1,Foxo1,H2-Ab1,H2-D1,H2-K1,Ikzf1,Il6,Inpp5d,Irf8,Itpkb,Klf2,Lat,Lta,Ltb,Lyn,Mcl1,Mpz,Notch2,Pax5,Pdpk1,Pik3ap1,Prf1,Sfpi1,Sox4,Srf,Sykb,Tap1,Tap2,Tcf12,Tcf3,Tgfbr2,Tnf,Tnfrsf13c,Traf2,Xrcc6,Zap70,Zbtb7b	NA	NA	NA	NA	NA	NA	NA	NA	NA	NA	NA
Mouse Phenotype	altered susceptibility to autoimmune disorder	0		0					9.44492e-96			0		Acan,Apoe,Axl,B2m,B9d2,BC096441,Bak1,Batf,Bax,Ccl2,Ccr2,Ccr7,Ccr8,Cd19,Cd28,Cd300lf,Cd38,Cd44,Cd69,Cd74,Cd79a,Cd80,Cdk4,Cfb,Clec5a,Cry2,Cx3cr1,Cxcr2,Cxcr4,Dnase1,Dusp2,E2f2,Ecm1,Elf1,Fadd,Fasl,Fcer1g,Fcgr1,Fcgr2b,Fcgr3,Gadd45b,Gna13,H2-Ab1,H2-T23,Hc,Hcst,Hif1a,Icam1,Ifnar1,Ifngr1,Il17f,Il21r,Il6,Il6st,Il9r,Ins1,Irf1,Irs1,Ksr1,Lat,Lepr,Lgals1,Lgals9,Lin9,Lta,Lyn,Map4k1,Mapk14,Mmp2,Mmp9,Mog,Mpo,Mr1…	NA	Adamts5,Alox5,Axl,B2m,B9d2,BC096441,Bmx,C3,Ccr2,Ccr7,Cd19,Cd274,Cd276,Cd300lf,Cd38,Cd40lg,Cd44,Cd55,Cd80,Cfb,Cry2,Ctla4,Dnase1,Dusp1,E2f1,E2f2,Ecm1,F2rl1,Fasl,Fcgr2b,Fcgr3,Foxp3,Fyn,Hc,Icam1,Icos,Ifnar1,Ifngr2,Il1a,Il1b,Il21r,Il2rb,Il4,Irf1,Ksr1,Lat,Lepr,Lgals1,Lgals9,Ltb4r1,Mapk14,Mbp,Mpo,Ndst2,Nfkb1,Ngfr,Nos2,Nr3c1,Pdcd1lg2,Plau,Polr2a,Prkci,Psen2,Ptpn6,Ptprn,Rag1,S1pr1,Spn,Stim1,Stim2,Syvn1,Tb…	NA	NA	NA	NA	Alox5ap,Cd276,Cd69,Dusp2,E2f2,Il12a,Il21r,Ksr1,Lgals9,Lta,Lyn,Ncf1,Nos2,Pla2g4a,Plcg2,Prkcq,Socs1,Stat4,Tnf,Ubash3a	NA	NA	Adamts5,Alox5,Apoe,Axl,B2m,B9d2,BC096441,Bak1,Bax,Bcl2l11,Bmx,C3ar1,Casp1,Ccr2,Ccr7,Ccr8,Cd19,Cd274,Cd276,Cd40lg,Cd44,Cd55,Cry2,Csf3,Ctsl,Ctss,Cx3cr1,E2f2,Ecm1,Elf1,F2,Fadd,Fasl,Fcgr1,Fcgr2b,Fcgr3,Gadd45b,Gna13,H2-Ab1,H2-T23,Hc,Hr,Ifnar1,Ifngr2,Il1a,Il1b,Il21r,Il27,Il2rb,Il4,Il6,Il9r,Ksr1,Lat,Lepr,Lgals1,Lgals9,Lin9,Ltb4r1,Map4k1,Mapk14,Mbp,Mpo,Mt1,Mt2,Mta2,Myd88,Ndst2,Nfe2l2,Nfkb1,Ngfr,Nkx3-1,No…	NA
Mouse Phenotype	altered susceptibility to infection	0		0					1.05838e-141			0		Adamts13,Adh5,Adprh,Aim2,Apoe,B2m,BC096441,Bcl10,Bcl3,C4b,Card9,Ccl2,Ccl3,Ccnd1,Ccr1,Ccr2,Ccr4,Ccr5,Cd19,Cd207,Cd24a,Cd28,Cd44,Cd5l,Cd74,Cd81,Cd97,Cebpb,Cebpe,Cerk,Cfb,Clec4e,Clec4n,Clec7a,Clic4,Ctnnb1,Cx3cr1,Cxcl15,Cxcl16,Cxcl5,Cxcr2,Cxcr3,Dapp1,Ddit3,Defb1,Defb3,Dusp4,Ebag9,Ebi3,Fadd,Fasl,Fcer1g,Fcgr1,Fgr,Flt3,Fos,Foxa1,Foxn1,Fut4,Fut7,G6pc3,Git2,Gnai2,Grb2,H2-Ab1,H2-D1,H2-K1,H2-T23,Hc,Icam1,Ie…	NA	Adprh,Apcs,Apobec3,Aqp9,Arhgap15,B2m,BC096441,Bcl10,C3,C4b,Card9,Ccr1,Ccr2,Ccr5,Cd19,Cd24a,Cd274,Cd40lg,Cd44,Cd47,Cd81,Cd97,Cebpb,Cerk,Cfb,Clec4e,Clec4n,Clic4,Csf2rb,Ctnnb1,Ctsg,Cybb,Dapp1,Ddit3,Defb1,Defb3,Dusp1,Ebag9,Ebi3,Fasl,Fgg,Fgr,Flt3,Gab2,Gata3,Git2,Gpc3,Grb2,Gzmb,H2-K1,Hc,Icam1,Ier3,Ifih1,Ifnar1,Ifnar2,Ifngr2,Iigp1,Ikzf1,Il1b,Il21r,Il2rg,Il4,Il4ra,Inpp5d,Irf1,Irf9,Irgm1,Itgb2,Itpkb,Kit,K…	NA	NA	NA	NA	Ccl3,Cebpb,Clec7a,Clic4,Dusp4,Flt3,H2-D1,Hps5,Ier3,Ikzf1,Il12a,Il21r,Il4ra,Itpkb,Klra10,Klra17,Lta,Ltb,Mbtps1,Ncf1,Nfkbia,Nos2,Pik3r1,Plcg2,Slamf1,Slamf6,Socs1,Stat1,Stat4,Tnf,Tom1l2,Vsig4	NA	NA	Aim2,Apoe,Aqp9,Arhgap15,B2m,BC096441,Bahd1,Bcl10,C5ar1,Casp1,Casp12,Cby1,Ccr1,Ccr2,Ccr5,Cd19,Cd24a,Cd274,Cd40lg,Cd44,Cd47,Cd97,Cebpb,Cebpe,Cerk,Chrna3,Chrnb4,Clec4e,Clec4n,Clic4,Csf2rb,Csf3,Csk,Ctsg,Cx3cr1,Cxcl15,Cxcl5,Cyba,Dapp1,Ddit3,Defb1,Defb3,Dicer1,E2f4,Ebag9,Ebi3,F2,Fadd,Fasl,Fcgr1,Fgr,Flt3,Foxn1,Fut7,Gab2,Git2,Gnai2,Gpc3,Grb2,Gzmb,H2-Ab1,H2-T23,Hc,Hps5,Ier3,Ifih1,Ifnar1,Ifnar2,Ifngr2,Igtp…	NA
Mouse Phenotype	altered tumor pathology	0		0								0		Ace,Adam15,Adipoq,Aes,Amhr2,Antxr1,Apc,Braf,Brca2,Ccnd1,Ccr2,Cd44,Cdk4,Cdkn1b,Cdkn2a,Cebpa,Cebpb,Chek1,Cks1b,Ctnnb1,Cul9,Cxcl16,Cxcr2,Cxcr3,Dmtf1,Errfi1,Ets2,Fasl,Fos,Foxn1,Fut7,Gpc1,H2afx,Hcst,Hif1a,Icam1,Id3,Ifnar1,Ifngr1,Il12rb2,Iqgap2,Itgb5,Lepr,Map3k1,Mbd2,Mbd3,Men1,Mfge8,Mgat5,Mmp2,Mmp9,Msh2,Msi2,Msmb,Ncoa3,Nos2,Pdcd1lg2,Pggt1b,Plau,Plk3,Polr2a,Prdx1,Prf1,Ptch1,Pten,Ptger1,Ptger2,Rhoc,Rpl27…	NA	Ace,Amhr2,Antxr1,Apobec3,Ccr2,Cd44,Cdkn1b,Cebpb,Ctnnb1,Cybb,E2f1,Ets2,F2rl1,Fasl,Fbln5,Figf,Fntb,Gadd45a,Gzmb,Icam1,Id1,Id3,Ifnar1,Il1a,Il1b,Iqgap1,Iqgap2,Itgb3,Itgb5,Lepr,Map3k1,Mbd2,Msi2,Msmb,Nckap1,Ncoa3,Nos2,Pdcd1lg2,Pgf,Pik3cb,Plau,Polr2a,Ptger1,Rb1,Rbl2,Rcan1,Runx1,S1pr2,Stat3,Tbx21,Tgm2,Ticam1,Tmem49,Tom1l2,Trp53	NA	NA	NA	NA	NA	NA	NA	Ace,Aes,Antxr1,Ar,Casp1,Ccr2,Cd226,Cd44,Cdkn1b,Cebpb,Cks1b,Cygb,Dear1,Erbb2,Ets2,Fasl,Figf,Fntb,Foxn1,Fut7,Fzr1,Gadd45a,Gzmb,H2afx,Hic1,Hr,Htatip2,Id1,Id3,Ifnar1,Il12rb2,Il1a,Il1b,Iqgap1,Itga6,Itgb3,Itgb5,Lep,Lepr,Map3k1,Mbd2,Mbd3,Men1,Mmp11,Msi2,Msmb,Nckap1,Ncoa3,Nos2,Pdcd1lg2,Pik3cb,Plau,Polr2a,Prdx1,Ptger1,Ptk2,Rb1,Rbl2,Rcan1,Rhoc,Rpl27a,Runx1,Smad3,Sparc,Stat3,Stk11,Tbx21,Tgm2,Tmem49,Tom1l2,T…	NA
Mouse Phenotype	altered tumor susceptibility	0										0		1190003J15Rik,2700078K21Rik,Abcb4,Adam15,Adipoq,Aes,Akt1,Akt3,Amh,Amhr2,Apc,Asph,Atp2a2,Aurkb,B2m,Bag1,Bard1,Bax,Becn1,Bin3,Braf,Brca2,Casc1,Ccl2,Ccnd1,Cd19,Cd34,Cd44,Cdk11b,Cdk4,Cdkn1b,Cdkn2a,Cdkn2b,Cdsn,Cdx2,Cebpa,Cebpb,Chd2,Chek1,Chuk,Cks1b,Ctnnb1,Cul9,Cxcr3,Cxcr6,Cytip,Dgkd,Dmtf1,Dnd1,Dok2,Eef1a1,Egr1,Erbb3,Ercc1,Errfi1,Esam,Ets2,Ewsr1,F2r,F3,Fasl,Fbxo30,Fgfr2,Flcn,Fli1,Fos,Foxm1,Foxn1,Foxo1,…	NA	NA	NA	NA	NA	NA	NA	NA	NA	2700078K21Rik,Abcb4,Aes,Aip,Akt1,Amelx,Ar,Arid4a,Arid4b,Asph,Atm,Aurkb,B2m,Bax,Becn1,Blm,Bmpr1a,Ccne1,Cd19,Cd226,Cd44,Cd47,Cdkn1b,Cdx2,Cebpb,Chd2,Chek2,Cks1b,Ctsg,Cxcr6,Cygb,Cyp1a2,Dek,Dicer1,Dkc1,Dnd1,Dok1,Dok3,Dph1,E2f4,Egr1,Eif4e,Erbb2,Erbb3,Ercc1,Esam,Esr2,Ets2,Ewsr1,F2r,Fasl,Fgf2,Fli1,Fntb,Foxn1,Foxo3,Fzr1,Gadd45a,Gast,Ggta1,Gli1,Gnai2,Gnmt,Gprc5a,Grb2,Gstp1,Gstp2,H2afx,Hic1,Hivep3,Hmga1,Hmm…	NA
Mouse Phenotype	anemia	0		0						0	7.63575e-113	0		Ada,Amhr2,Apc,Apoe,Arf6,B2m,Bak1,Bax,Bin3,Cbfa2t3,Ccnd1,Ccnd2,Cd74,Cflar,Clec1b,Col4a1,Ctnnb1,Dffb,Diap1,Egr1,Eif2ak1,Eif2c2,Eng,Ep400,Erg,Exoc6,Fasl,Fbn1,Fcer1g,Fcgr1,Fcgr2b,Fcgr3,Fech,Fli1,Fshr,Gem,Gimap5,Gtf3c2,H2-Ab1,Hfe,Hfe2,Hk1,Hlx,Hyal2,Ifnar1,Igf2bp1,Ikzf1,Il2ra,Il6st,Inpp5d,Kit,Klf2,Lat,Lhx2,Lyn,Mafk,Man2a1,Mapk14,Mdm4,Mgat2,Mll1,Myb,Mycn,Nfe2,Nfe2l1,Nfe2l2,Nfkbia,Nkx2-5,Notch1,Nr4a1,Pbx…	NA	2010002N04Rik,Ada,Add1,Add2,Alas2,Amhr2,B2m,Bnip3l,C1galt1,C3,Cbfa2t3,Ccnd2,Cd47,Cd59a,Cd59b,Ctnnb1,Ctsg,Dffb,Diap1,Dkc1,Egr1,Eif2c2,Eng,Epb4.2,Epor,Erf,Erg,Esr2,Exoc6,Fasl,Fbn1,Fcgr2b,Fcgr3,Fech,Foxo3,Foxp3,Gata1,Gmnn,Gtf3c2,Hbb-b1,Hfe,Ifnar1,Igf2bp1,Ikzf1,Il2rb,Inpp5d,Itgb3,Kit,Klf2,Lat,Mapk14,Mdm2,Med24,Myb,Nbn,Ncor1,Nek1,Nfatc3,Nfatc4,Nkx2-5,Notch1,Otc,Picalm,Pot1b,Pou2f1,Prkaa1,Prkag1,Prkg1,…	NA	NA	NA	NA	NA	Add2,Alas2,B2m,Cbfa2t3,Cd47,Cd59a,Cd59b,Dnase2a,Egr1,Eif2c2,Epb4.2,Fech,Foxo3,Gata1,Hba-a2,Hba-x,Hbb-b1,Hfe,Hk1,Hyal2,Ifnar1,Ikzf1,Il2rb,Klf1,Mafk,Mapk14,Mdm2,Nkx3-1,Nprl3,Pklr,Prkaa1,Sipa1,Slc20a1,Slc25a37,Slc40a1,Slc4a1,Spna1,Spnb1,Tmod1,Tmprss6,Trp53,Tspan33,Txnrd2,Wdr1	2010002N04Rik,Bin3,Blm,Cbfa2t3,Cd47,Epor,Fasl,Gata1,Hlx,Il2rb,Itga2b,Lgmn,Mafk,Nfe2,Ptprj,Runx1,Sap30bp,Spna1,Tfrc,Thoc5,Tmprss6,Zfpm1	Ada,Add1,Add2,Alas2,Apoe,Arf6,Arhgap1,Arid4a,Atm,B2m,Bak1,Bax,Blm,C1galt1,Cbfa2t3,Cby1,Ccna2,Ccnd2,Ccne1,Cd47,Cd59a,Cd59b,Cflar,Chek2,Ctsg,Diap1,Dicer1,Dkc1,E2f4,Egr1,Eif2ak1,Eif2c2,Ep400,Erf,Erg,Esr2,Exoc6,Fasl,Fcgr1,Fcgr2b,Fcgr3,Fech,Fermt3,Fli1,Foxo3,Gata1,Gata2,Gem,H2-Ab1,Hba-a2,Hba-x,Hbb-b1,Hfe,Hfe2,Hk1,Hlx,Hyal2,Ifnar1,Igf2bp1,Ikzf1,Il2rb,Inpp5d,Itgb3,Klf2,Lat,Lgmn,Ly6a,Mafk,Mapk14,Mdm4,Myb…	NA
Mouse Phenotype	arthritis	0												Acan,Ank,Atp7a,BC096441,Bak1,Bax,Cd44,Cd69,Cfb,Clec5a,Col2a1,Comp,Cry2,Cxcr2,Cxcr4,Dusp2,Errfi1,Fcgr1,Hc,Hif1a,Hyal1,Ifnar1,Ifngr1,Il17f,Il6st,Irf1,Itgb7,Ksr1,Lgals9,Lta,Mapk14,Matn3,Mmp9,Ndst2,Ndufaf1,Pdcd1,Pecam1,Plau,Ptgs1,Ptgs2,Ptpn6,Selp,Smad3,Tnf,Tpsab1,Tpsb2,Tyrobp,Zap70,Zfp36	NA	NA	NA	NA	NA	NA	NA	NA	NA	NA	NA
Mouse Phenotype	autoimmune response	0		0					1.36438e-121			0		Acan,Apoe,Arsa,Axl,B2m,B9d2,BC096441,Bak1,Batf,Bax,C4b,Ccl2,Ccr2,Ccr7,Ccr8,Cd19,Cd22,Cd28,Cd300lf,Cd38,Cd44,Cd69,Cd74,Cd79a,Cd80,Cdk4,Cfb,Chuk,Clec5a,Col17a1,Cry2,Cx3cr1,Cxcr2,Cxcr4,Def6,Dnase1,Dntt,Dtx1,Dusp2,E2f2,Ecm1,Elf1,Fadd,Fasl,Fbn1,Fcer1g,Fcgr1,Fcgr2b,Fcgr3,Fcrlb,Foxo1,Gadd45b,Gna13,Gpr132,H2-Ab1,H2-T23,Hc,Hcst,Hif1a,Icam1,Id3,Ifnar1,Ifngr1,Il10ra,Il12rb2,Il17f,Il21r,Il4ra,Il5ra,Il6,Il6st…	NA	Adamts5,Alox5,Apcs,Axl,B2m,B9d2,BC096441,Bmx,C3,C4b,Ccr2,Ccr7,Cd19,Cd274,Cd276,Cd300lf,Cd38,Cd40lg,Cd44,Cd55,Cd80,Cfb,Cry2,Ctla4,Dnase1,Dtx1,Dusp1,E2f1,E2f2,Ecm1,F2rl1,Fasl,Fbn1,Fcgr2b,Fcgr3,Fcrlb,Foxp3,Fyn,Gadd45a,Hc,Icam1,Icos,Id3,Ifnar1,Ifngr2,Il1a,Il1b,Il21r,Il2rb,Il4,Il4ra,Irf1,Itgav,Itgb2,Kit,Ksr1,Lat,Lat2,Lcp2,Lepr,Lgals1,Lgals9,Ltb4r1,Mapk14,Mbp,Mpo,Mpz,Ndst2,Nfkb1,Ngfr,Nos2,Nr3c1,Pdcd1lg…	NA	NA	NA	NA	Alox5ap,Cd276,Cd69,Dusp2,E2f2,Id3,Il12a,Il21r,Il4ra,Ksr1,Lgals9,Lta,Lyn,Ncf1,Nfkbia,Nos2,Pla2g4a,Plcg2,Prkcq,Socs1,Stat4,Tlr7,Tlr8,Tnf,Ubash3a,Zc3h12a	NA	NA	Adamts5,Alox5,Apoe,Arsa,Axl,B2m,B9d2,BC096441,Bak1,Bax,Bcl2l11,Bmx,C3ar1,Casp1,Ccr2,Ccr7,Ccr8,Cd19,Cd274,Cd276,Cd40lg,Cd44,Cd55,Cry2,Csf3,Ctsl,Ctss,Cx3cr1,Def6,Dtx1,E2f2,Ecm1,Elf1,F2,Fadd,Fasl,Fcgr1,Fcgr2b,Fcgr3,Fcrlb,Gadd45a,Gadd45b,Gna13,H2-Ab1,H2-T23,Hc,Hr,Id3,Ifnar1,Ifngr2,Ikzf3,Il10ra,Il12rb2,Il1a,Il1b,Il21r,Il27,Il2rb,Il4,Il4ra,Il6,Il9r,Itgb2,Ksr1,Lat,Lcp2,Lepr,Lgals1,Lgals9,Lin9,Ltb4r1,Map…	NA
Mouse Phenotype	carcinoma	0										0		1190003J15Rik,2700078K21Rik,Abcb4,Aes,Akt1,Akt3,Amhr2,Apc,Atp2a2,Aurkb,B2m,Bard1,Bax,Becn1,Bin3,Braf,Brca2,Casc1,Ccnd1,Cdk4,Cdkn1b,Cdkn2a,Cdkn2b,Cebpa,Chek1,Chuk,Ctnnb1,Dmtf1,Dok2,Eef1a1,Errfi1,F2r,F3,Flcn,Foxm1,Fshr,Gnai2,Gnmt,Grb2,H2afx,Hspa5,Il12rb2,Iqgap2,Itgav,Lass2,Mad1l1,Map2k7,Mapk14,Mcm4,Men1,Mfge8,Mmp9,Msh2,Msmb,Mzf1,Ncoa3,Nfe2l1,Nudt1,Pggt1b,Plau,Plk3,Pms2,Pole,Polh,Polr2a,Ppard,Ppp2r1…	NA	NA	NA	NA	NA	NA	NA	NA	NA	2700078K21Rik,Abcb4,Aes,Akt1,Ar,Aurkb,B2m,Bax,Becn1,Blm,Cdkn1b,Chek2,Dkc1,Dok1,Dok3,F2r,Fntb,Fzr1,Gadd45a,Gnai2,Gnmt,Gprc5a,Grb2,H2afx,Hic1,Hr,Hspa5,Htatip2,Il12rb2,Iqgap1,Lass2,Ly6a,Lzts1,Mad1l1,Mapk14,Mc1r,Men1,Mmp11,Msmb,Nckap1,Ncoa3,Nkx3-1,Nudt1,Plau,Pms2,Pold1,Polh,Polr2a,Ppard,Prdx1,Psmb9,Ptch2,Ranbp2,Rb1,Rbl2,Rfwd2,Rhoc,Rint1,Rnf8,Scgb1a1,Smad1,Smad3,Ssbp2,Stat3,Stk11,Stk3,Tbx21,Tgfb1,Tiam…	NA
Mouse Phenotype	complete lethality throughout fetal growth and development	0										0		Adam17,Adipoq,Adrbk1,Apaf1,Bax,Bmpr2,Cacna1c,Calcrl,Calr,Ccnd1,Ccnd2,Cdk4,Cdkn1b,Chuk,Col4a1,Col4a2,Cr1l,E2f3,Ednrb,Elavl1,Enah,Ets1,Ets2,Etv5,Fbn1,Flna,Foxf1a,Foxm1,Gata5,Glrx3,Gpr124,Grhl2,Gsk3b,Hdac5,Hes3,Hhex,Hs6st1,Ikzf1,Il6st,Itga3,Itgav,Kit,Klf2,Lama5,Lhx2,Lrp5,Lsr,Map3k4,Mapk14,Mcm4,Mecom,Meis1,Men1,Mkl2,Mll1,Mtf1,Mthfd2,Myb,Myh10,Myl2,Ncor2,Nkx2-5,Palld,Parp1,Pbrm1,Pbx1,Pik3r1,Pkd1,Psen1…	NA	NA	NA	NA	NA	NA	NA	NA	NA	Adam19,Adm,Bax,Bid,Blm,Bmpr1a,Bmpr2,C1galt1,Calcrl,Calr,Ccnd2,Cdkn1b,Cited2,Ctbp1,Dicer1,E2f4,Ets1,Ets2,Foxf1a,Fuz,Gata1,Gfi1b,Gpr124,Hand2,Hes3,Hhex,Hs6st1,Ikzf1,Intu,Itga3,Itga5,Itga6,Klf2,Lama5,Ly6e,Mab21l2,Map3k4,Mapk14,Meis1,Men1,Mtf1,Mthfd2,Myb,Myh10,Myl2,Nckap1,Ncor1,Ncor2,Neurod4,Nkx2-5,Nkx3-1,Nprl3,Parp1,Pax7,Pbrm1,Pbx1,Phospho1,Pik3r1,Plcg2,Porcn,Pou2f1,Psen1,Ptk2,Ramp2,Rb1,Rheb,Runx1,R…	NA
Mouse Phenotype	cortical renal glomerulopathies	0										0		Actn4,Apoe,Arhgdia,Bak1,Bax,C4b,Ccni,Ccr2,Cd19,Cebpb,Chd2,Dnase1,Dtx1,E2f2,Fasl,Fcer1g,Fcgr2b,Fh1,Gadd45b,Glis2,Gtf3c2,Ifnar1,Ifngr1,Il12rb2,Il5ra,Irf1,Itga3,Kit,Lat,Lepr,Lmx1b,Lyn,Man2a1,Mgat2,Mmp9,Mta2,Nfe2l2,Nos2,Pdcd1,Pdgfrb,Pdss2,Prkcd,Psen1,Ptgs2,Rassf5,Rc3h1,Relb,Ret,Rpl22,Rxra,Selp,Selplg,Socs1,Spna1,Tank,Tk1,Tlr7,Tlr8,Tlr9,Tns1,Top3b,Tusc2,Vegfa	NA	NA	NA	NA	NA	NA	NA	NA	NA	Abca1,Actn4,Adm,Apoe,Bak1,Bax,Bcl2l11,C1galt1,Ccni,Ccr2,Cd19,Cebpb,Chd2,Col4a3,Col4a4,Dkc1,Dtx1,E2f2,Fasl,Fcgr2b,Gadd45a,Gadd45b,Golm1,Hr,Ifnar1,Ikzf3,Il12rb2,Il4,Itga3,Lat,Lepr,Lmx1b,Mta2,Nfe2l2,Nkx3-1,Nos2,Pdgfb,Pdss2,Plcg2,Prdx6,Prkcd,Psen1,Psen2,Relb,Rpl22,Rxra,Scgb1a1,Selplg,Socs1,Spna1,Tk1,Top3b,Tusc2,Wt1	NA
Mouse Phenotype	decreased B cell number	0		0					1.47029e-116			0		Adam10,Adam17,Aff1,Apoe,Arhgdia,Arhgdib,Arhgef1,Arid3a,B2m,Bak1,Batf,Bax,Bcl10,Bcl11a,Bcl3,Bik,Birc2,Birc3,Bst1,Cbfa2t3,Cd19,Cd22,Cd24a,Cd28,Cd72,Cd79a,Cd81,Cd84,Chuk,Col10a1,Cxcr4,Cxcr7,Dapp1,Dck,Dll1,Dock2,Dock8,Dtx1,Eef1a2,Erg,Ets1,Ewsr1,F3,Faim3,Fasl,Fli1,Flt3,Flt3l,Fos,Foxn1,Foxo1,Galr2,Ggta1,Gimap1,Gimap5,Git2,Gna13,Grb2,H2afx,Hdac1,Igll1,Ikzf1,Il5ra,Il6st,Inpp5d,Irf2,Irf8,Itgb7,Jak1,Kit,Lt…	NA	Adam10,Aff1,Arhgef6,Arid3a,Arid4b,Arntl,Asxl1,B2m,Bcl10,Bcl11a,Bik,Birc2,Birc3,Blk,Bst1,Cbfa2t3,Cd19,Cd24a,Cd81,Col10a1,Crlf2,Dapp1,Dck,Dkc1,Dtx1,Erg,Ewsr1,Fasl,Flt3,Fyn,Galr2,Gfi1,Ggta1,Git2,Gpr183,Grb2,Icos,Id1,Ikzf1,Il2rb,Il2rg,Il4,Inpp5d,Irf2,Itga4,Jak1,Kit,Klhl6,Malt1,Map3k14,Mcl1,Mcm3ap,Mdm2,Mll5,Msi2,Myb,Nbn,Nedd4,Nfkb1,Nr3c1,Nup98,Pfdn1,Pik3r1,Pim1,Pim2,Poll,Polr2a,Ppp2r3c,Ptpn6,Rac2,Rag1…	NA	NA	NA	NA	Bach2,Bcl11a,Cd84,Dock8,Ets1,Fli1,Flt3,Ggta1,Gimap1,Gimap5,Ikzf1,Irf2,Klhl6,Lta,Ltb,Lyn,Nfkbia,Pik3r1,Plcg2,Rgs1,Socs1,Tec,Tlr7,Tlr8,Tnf	NA	NA	Aff1,Apoe,Arhgdib,Arhgef6,Arid4a,Arid4b,Arntl,Atm,B2m,Bak1,Bax,Bcl10,Bcl2l11,Bik,Birc2,Birc3,Cbfa2t3,Cd19,Cd24a,Cd72,Cds2,Dapp1,Dicer1,Dkc1,Dtx1,Erg,Ets1,Ewsr1,Fasl,Fli1,Flt3,Flt3l,Foxn1,Galr2,Gfi1,Ggta1,Git2,Gna13,Gpr183,Grb2,H2afx,Hdac1,Htra2,Id1,Igll1,Ikzf1,Ikzf3,Il2rb,Il4,Il7r,Inpp5d,Irf2,Irf8,Itga4,Itgb7,Itk,Jak1,Klhl6,Klhl7,Ltbr,Maml1,Mcl1,Mcm3ap,Msi2,Mt1,Mt2,Myb,Myd88,Nedd4,Nfkb1,Nkx3-1,Nr…	NA
Mouse Phenotype	decreased CD4-positive T cell number	0		0								0		Adam10,Apoe,B2m,B9d2,Batf,Bcl11a,Ccl5,Ccnd1,Ccr2,Ccr7,Cd247,Cd28,Cd3d,Cd3e,Cd74,Cd83,Cd84,Cr1l,Ctcf,Diap1,Dll1,Dock2,Ebi3,Elavl1,Elk4,Ets1,Fadd,Foxn1,Gem,Gimap1,Gimap5,Git2,Gpr30,Grap2,Grb2,H2-Aa,H2-Ab1,Id3,Ifngr1,Il21r,Il4ra,Il5ra,Itgam,Itgb7,Itpkb,Lat,Lepr,Map3k3,Mcl1,Mpz,Msi2,Myb,Nfatc2ip,Nfe2l2,Nfkbia,Notch1,Nr3c1,Pbx1,Plcg1,Pnp,Prf1,Rad52,Rhoh,Rnf8,Rpl22,Runx1,Runx3,Sema4d,Sfpi1,Sgpl1,Sharpi…	NA	Adam10,Arhgef6,Asxl1,B2m,B9d2,Bcl11a,Ccr2,Ccr7,Cd247,Chi3l1,Cr1l,Ctcf,Ctla4,Diap1,Dll4,Ebi3,Esr2,Foxp3,Fyn,Gata3,Git2,Gmnn,Grap2,Grb2,Icos,Id3,Il21r,Il2rg,Il4ra,Itga4,Itgb2,Itpkb,Lat,Lcp2,Lepr,Map3k3,Mcl1,Mpz,Msi2,Myb,Nbn,Nfatc2ip,Nfatc3,Nfkb1,Notch1,Nr3c1,Nup98,Rag1,Rfx5,Rhoh,Rnf8,Rpl22,Runx1,Runx3,Sema4d,Sfpi1,Sp3,Stat3,Stat5b,Stk4,Tbx21,Tgfb1,Themis,Vav1	NA	NA	NA	NA	NA	NA	NA	Apoe,Arhgef6,Atm,B2m,B9d2,Ccr2,Ccr7,Cd247,Ctcf,Ctsl,Diap1,Dll4,Ebi3,Esr2,Ets1,Fadd,Foxn1,Gem,Git2,Grap2,Grb2,H2-Aa,H2-Ab1,Id3,Il21r,Il4ra,Il7r,Itga4,Itgb2,Itgb7,Itk,Lat,Lcp2,Lep,Lepr,Map3k3,Mcl1,Mpz,Msi2,Myb,Nfatc2ip,Nfatc3,Nfe2l2,Nfkb1,Notch1,Nr3c1,Pbx1,Pla2g10,Plcg1,Prnp,Rfx5,Rnf8,Rpl22,Runx1,Runx3,Sema4d,Sfpi1,Sharpin,Sit1,Slfn2,Socs1,Stat3,Stat6,Tbx21,Tcf3,Tgfb1,Themis,Vav1,Vav2	NA
Mouse Phenotype	decreased CD8-positive T cell number	0		0								0		Apoe,B2m,Cd247,Cd3d,Cd3e,Cd3g,Cr1l,Ctcf,Diap1,Dll1,Dock2,Elavl1,Elk4,Ets1,Fadd,Foxn1,Foxo1,Gem,Gimap1,Gimap5,Git2,Gpr30,Grap2,Grb2,H2-Ab1,H2-D1,H2-K1,Hcst,Id3,Ifngr1,Irf1,Itpkb,Lat,Map3k3,Mcl1,Mpz,Msi2,Myb,Myh9,Nfkbia,Notch1,Nr3c1,Pbx1,Pdcd1,Pdcd1lg2,Plcg1,Pnp,Ppm1d,Prf1,Psmb11,Psmb8,Psmb9,Rad52,Rhoh,Rnf8,Rpl22,Runx1,Runx3,Sfpi1,Sgpl1,Sit1,Sos1,Srf,St3gal1,Stk4,Tap1,Tap2,Tapbp,Themis,Tpp2,Vav1,Va…	NA	Arhgef6,B2m,Cd247,Cd274,Cr1l,Ctcf,Ctla4,Diap1,Dll4,Drosha,Esr2,Fyn,Gata3,Git2,Gmnn,Grap2,Grb2,H2-K1,Id3,Il2rb,Il2rg,Irf1,Itgb2,Itpkb,Lat,Lcp2,Map3k3,Mcl1,Mpz,Msi2,Myb,Myh9,Nfatc3,Nfkb1,Notch1,Nr3c1,Pdcd1lg2,Ppm1d,Psmb11,Rag1,Rhoh,Rnf8,Rpl22,Runx1,Runx3,Sfpi1,St8sia1,Stat5b,Stk4,Tapbp,Tbx21,Themis,Ticam1,Vav1	NA	NA	NA	NA	NA	NA	NA	Apoe,Arhgef6,Atm,B2m,Cd247,Cd274,Csk,Ctcf,Diap1,Dll4,Drosha,Esr2,Ets1,Fadd,Foxn1,Gem,Git2,Grap2,Grb2,H2-Ab1,Id3,Il2rb,Il7r,Itgb2,Itk,Lat,Lcp2,Map3k3,Mcl1,Mpz,Msi2,Myb,Myh9,Nfatc3,Nfkb1,Notch1,Nr3c1,Pbx1,Pdcd1lg2,Pla2g10,Plcg1,Prnp,Psmb8,Psmb9,Rnf8,Rpl22,Runx1,Runx3,Sfpi1,Sit1,Slfn2,St3gal1,St8sia1,Tap1,Tap2,Tbx21,Themis,Vav1,Vav2	NA
Mouse Phenotype	decreased double-negative T cell number	0										0		Apc,Bcl10,Birc5,Braf,Casp3,Cd247,Cd3g,Cd5l,Col10a1,Cops5,Cpa3,Crip3,Cxcr4,Dmtf1,Elk4,Ets1,Fbxo30,Fcer1g,Fli1,Flt3,Flt3l,Fos,Foxn1,Gem,Gimap1,Gimap5,Grap2,Grb2,Ikzf1,Il6st,Ing1,Inpp5d,Jak1,Kit,Klf13,Lat,Maml1,Map3k3,Mcl1,Me2,Mll5,Msi2,Myb,Nfkbia,Notch1,Notch3,Pbx1,Plcg1,Ptcra,Rassf5,Rnf8,Rpl22,Runx1,Sfpi1,Socs1,Sos1,Srf,Tacc3,Tap1,Tcf12,Themis,Traf2,Trp53,Vav1,Vav2,Vav3,Xrcc6	NA	NA	NA	NA	NA	NA	NA	NA	NA	Atm,Bcl10,Birc5,Casp3,Cd247,Chek2,Cpa3,Dicer1,Dll4,Drosha,E2f4,Ets1,Fli1,Flt3,Flt3l,Foxn1,Fyb,Gem,Gfi1,Grap2,Grb2,Ikzf1,Il7r,Inpp5d,Itk,Jak1,Klf13,Lat,Lcp2,Maml1,Map3k3,Mcl1,Me2,Msi2,Myb,Nfatc3,Notch1,Notch3,Pbx1,Plcg1,Prnp,Ptcra,Ptk2,Rnf8,Rpl22,Runx1,Sfpi1,Socs1,Stat3,Tacc3,Tap1,Themis,Traf2,Twsg1,Vav1,Vav2,Vav3,Was,Xrcc6	NA
Mouse Phenotype	decreased hematopoietic cell number	0		0					7.72261e-291	0	1.19948e-216	0		AI848100,Ada,Adam10,Adam17,Adamts13,Aff1,Aim2,Akt1,Akt3,Ankrd11,Apc,Apoe,Arhgdia,Arhgdib,Arhgef1,Arid3a,B2m,B4galt1,B9d2,Bak1,Batf,Batf3,Bax,Bcl10,Bcl11a,Bcl3,Bik,Birc2,Birc3,Birc5,Braf,Bst1,Casp3,Cbfa2t3,Ccl11,Ccl2,Ccl25,Ccl3,Ccl5,Ccnd1,Ccnd2,Ccr1,Ccr10,Ccr2,Ccr3,Ccr4,Ccr7,Cd19,Cd207,Cd22,Cd247,Cd24a,Cd28,Cd34,Cd3d,Cd3e,Cd3g,Cd44,Cd5l,Cd72,Cd74,Cd79a,Cd80,Cd81,Cd83,Cd84,Cdk4,Cebpa,Cebpb,Cebpe,Ce…	NA	2010002N04Rik,AI848100,Abca1,Ada,Adam10,Aff1,Alas2,Ankrd11,Arhgap15,Arhgef6,Arid3a,Arid4b,Arntl,Asxl1,B2m,B4galt1,B9d2,Bcl10,Bcl11a,Bik,Birc2,Birc3,Blk,Bnip3l,Bst1,C1galt1,C3,Casp3,Cbfa2t3,Cbl,Ccnd2,Ccr1,Ccr10,Ccr2,Ccr3,Ccr7,Cd19,Cd247,Cd24a,Cd274,Cd40lg,Cd44,Cd47,Cd59b,Cd80,Cd81,Cebpb,Cerk,Chi3l1,Chst3,Clec4e,Col10a1,Cpa3,Cr1l,Crlf2,Csf2rb,Ctcf,Ctla4,Ctsd,Ctsg,Dapp1,Dck,Dffb,Diap1,Dkc1,Dll4,Dros…	NA	NA	NA	NA	Akt1,Bach2,Bcl11a,Ccl3,Ccl5,Cd84,Cebpb,Chst3,Clec1b,Cnn2,Csf3r,Dock8,Elk4,Ets1,Fli1,Flt3,Fyb,Ggta1,Gimap1,Gimap5,Gsx1,H2-D1,Hbb-b1,Hivep3,Id3,Ier3,Ikzf1,Il21r,Il4ra,Irf2,Itgb3,Itpkb,Klf2,Klhl6,Lgals9,Lta,Ltb,Lyn,Mafk,Mdm4,Myh9,Nfkbia,Nos2,Notch1,Pdgfb,Pik3r1,Plcg2,Ppp1r15b,Prkcq,Rgs1,Runx3,Serpinb2,Sin3b,Slc46a2,Socs1,Sp3,Sqstm1,Tec,Tlr7,Tlr8,Tnf,Tom1l2,Txnip,Vsig4,Zfp36l2	Aim2,Alas2,Ankrd11,B2m,B4galt1,Bcl10,Bcl11a,Bik,Birc2,Birc3,Cbfa2t3,Cd24a,Cd47,Cd59b,Cerk,Csf2rb,Cul4a,Cx3cl1,Cx3cr1,Dapp1,Dnase2a,Egr1,Eif2c2,Epb4.2,Fbxo30,Fech,Foxo3,Gadd45a,Gata1,Gfi1b,Gnai2,Hbb-b1,Hk1,Hr,Hyal2,Ier3,Ifnar1,Ifnar2,Igf1r,Ikzf1,Il21r,Il2rb,Il4ra,Itga4,Jak1,Klf1,Klf13,Lyve1,Mafk,Mdm2,Mtf1,Myc,Ndst2,Nkx3-1,Pcid2,Pfdn1,Pim1,Pim2,Pnp,Ppm1d,Ppp2r3c,Prkaa1,Prkcd,Rgs10,Rhoh,Rnf8,Runx3,S…	2010002N04Rik,AI848100,Aim2,Ankrd11,Arid3a,Bbc3,Cbfa2t3,Ccr1,Ccr2,Ccr3,Cd47,Chst3,Csf2rb,Dapp1,Epor,Fasl,Gata1,Gfi1b,Ggta1,Id3,Il2rb,Itga2b,Klf13,Lgals9,Lgmn,Lyl1,Mafk,Mtf1,Nfe2,Nos2,Pim2,Ptpn22,Ptprj,Rfx5,Runx1,Runx3,Spna1,St3gal1,Suv420h2,Thoc5,Tmprss6,Tnfrsf13c,Treml1,Xrcc6,Zfpm1	AI848100,Abca1,Ada,Aff1,Aim2,Akt1,Alas2,Ankrd11,Apoe,Arhgap15,Arhgdib,Arhgef6,Arid4a,Arid4b,Arntl,Atm,B2m,B4galt1,B9d2,Bak1,Batf3,Bax,Bcl10,Bcl2l11,Bik,Birc2,Birc3,Birc5,Bmpr1a,C1galt1,C3ar1,Casp3,Cbfa2t3,Cbl,Ccna2,Ccnd2,Ccr1,Ccr10,Ccr2,Ccr3,Ccr7,Cd19,Cd247,Cd24a,Cd274,Cd40lg,Cd44,Cd47,Cd59b,Cd72,Cds2,Cebpb,Cebpe,Cerk,Cflar,Chd2,Chd4,Chek2,Chst3,Cks1b,Clec4e,Cpa3,Csf1,Csf2rb,Csf3,Csf3r,Csk,Ctcf,C…	NA
Mouse Phenotype	decreased IgG1 level	0							5.89891e-63					Arid3a,Batf,Birc3,Cd19,Cd22,Cd28,Cd79a,Cd80,Cd81,Cd83,Dbnl,Dll1,Fcer1g,Fcer2a,Fcgrt,Fli1,Gcnt3,Gimap5,H2-Ab1,Ifnar1,Igll1,Il21r,Il4ra,Il5ra,Il6st,Itpkb,Klra10,Lta,Ltb,Lyn,Mcl1,Msh2,Myd88,Nfkbia,Nhej1,Pax5,Pou2af1,Ptgs2,Pvr,Rasgrp3,Rnf8,Rsad2,Stat6,Tbk1,Tlr7,Tlr8,Tnf,Tnfrsf13c,Traf5,Vav1,Vav2,Vav3	NA	NA	NA	NA	NA	NA	Bach2,Fli1,Gimap5,Il21r,Il4ra,Itpkb,Klra10,Lta,Ltb,Lyn,Nfkbia,Tlr7,Tlr8,Tnf	NA	NA	NA	NA
Mouse Phenotype	decreased IgG level	0							1.64406e-97					Arhgef1,Arid3a,Atf3,B2m,BC096441,Batf,Bcl10,Bcl3,Birc3,Bst1,Ccr7,Cd19,Cd22,Cd28,Cd79a,Cd80,Cd81,Cd83,Cd84,Dapp1,Dbnl,Dll1,Dusp4,Fcer1g,Fcer2a,Fcgrt,Fli1,Gcnt3,Ggta1,Gimap5,Grb2,H2-Ab1,H2afx,Hrh1,Ifnar1,Ifngr1,Igll1,Ikzf1,Il17f,Il21r,Il4ra,Il5ra,Il6st,Irf2,Itpkb,Klra10,Lta,Ltb,Lyn,Mcl1,Mcm3ap,Msh2,Myd88,Nfkbia,Nhej1,Nos2,Pax5,Pdcd1lg2,Pik3ap1,Pomt1,Pou2af1,Pten,Ptgs2,Pvr,Rasgrp3,Rftn1,Rnf8,Rsad2,S…	NA	NA	NA	NA	NA	NA	Bach2,Cd84,Dusp4,Fli1,Ggta1,Gimap5,Ikzf1,Il21r,Il4ra,Irf2,Itpkb,Klra10,Lta,Ltb,Lyn,Nfkbia,Nos2,Tec,Tlr7,Tlr8,Tnf	NA	NA	NA	NA
Mouse Phenotype	decreased immature B cell number	0		0								0		Adam10,Aff1,Arhgdia,Arhgdib,Arid3a,Bik,Birc3,Bst1,Cbfa2t3,Cd19,Cd24a,Cd79a,Dck,Erg,Ewsr1,Flt3,Flt3l,Gimap1,Grb2,Hdac1,Igll1,Ikzf1,Inpp5d,Kit,Lta,Lyn,Mcl1,Mll1,Mll5,Msi2,Myb,Nfkbia,Nfkbie,Notch2,Pax5,Pbx1,Pfdn1,Pik3ap1,Pik3r1,Pim1,Pou2af1,Ppp2r3c,Ptch1,Rac2,Relb,Rnf8,Sfpi1,Sgpl1,Socs1,Sox4,Sykb,Tcf12,Tcf3,Tnfrsf13c,Traf2,Vav1,Vav2,Vav3,Vpreb1,Xrcc6	NA	Adam10,Aff1,Arid3a,Arntl,Asxl1,Bik,Birc3,Blk,Bst1,Cbfa2t3,Cd19,Cd24a,Dck,Dkc1,Erg,Ewsr1,Flt3,Fyn,Grb2,Ikzf1,Il2rg,Inpp5d,Kit,Mcl1,Mdm2,Mll5,Msi2,Myb,Nbn,Pfdn1,Pik3r1,Pim1,Pim2,Ppp2r3c,Rac2,Rag1,Rnf8,Sfpi1,Tet2,Tnfrsf13c,Vav1,Xrcc6	NA	NA	NA	NA	NA	NA	NA	Aff1,Arhgdib,Arntl,Atm,Bcl2l11,Bik,Birc3,Cbfa2t3,Cd19,Cd24a,Dicer1,Dkc1,Erg,Ewsr1,Flt3,Flt3l,Grb2,Hdac1,Htra2,Igll1,Ikzf1,Il7r,Inpp5d,Mcl1,Msi2,Myb,Pbx1,Pfdn1,Pik3ap1,Pik3r1,Pim1,Pim2,Plcg2,Ppp2r3c,Ptprj,Rac2,Relb,Rnf8,Sfpi1,Socs1,Tcf3,Tet2,Tnfrsf13c,Traf2,Twsg1,Vav1,Vav2,Vav3,Vpreb1,Xrcc6	NA
Mouse Phenotype	decreased immunoglobulin level	0		0					1.3073e-109					Ada,Arhgef1,Arid3a,Atf3,B2m,BC096441,Batf,Bcl10,Bcl3,Birc3,Bst1,Ccr10,Ccr4,Ccr7,Cd19,Cd22,Cd28,Cd74,Cd79a,Cd80,Cd81,Cd83,Cd84,Cxcr4,Dapp1,Dbnl,Dll1,Dusp4,Ecm1,Fcer1g,Fcer2a,Fcgrt,Fli1,Foxn1,Gcnt3,Ggta1,Gimap5,Gp49a,Grb2,H2-Ab1,H2afx,Hrh1,Id3,Ifnar1,Ifngr1,Igll1,Ikzf1,Il17f,Il21r,Il4ra,Il5ra,Il6,Il6st,Irf2,Irf8,Itpkb,Klra10,Lilrb4,Lta,Ltb,Lyn,Mcl1,Mcm3ap,Mmp9,Msh2,Myd88,Nfkbia,Nhej1,Nos2,Pax5,Pdcd…	NA	Ada,Arid3a,Arntl,B2m,BC096441,Bcl10,Birc3,Bst1,C3,Ccr10,Ccr7,Cd19,Cd40lg,Cd80,Cd81,Chi3l1,Crlf2,Cxcl9,Dapp1,Ecm1,F2rl1,Fyn,Gata3,Gcnt3,Ggta1,Gpr183,Grb2,Hdac6,Hrh1,Icos,Id3,Ifnar1,Ifnar2,Ikzf1,Il21r,Il2rg,Il4,Il4ra,Irf2,Itpkb,Klra10,Ltb4r1,Malt1,Map3k14,Mcl1,Mcm3ap,Nbn,Nedd4,Nfkb1,Nhej1,Nos2,Nup98,Pdcd1lg2,Rag1,Rcan1,Rfx5,Rnf8,Sash3,Siglecg,Slc3a2,Tbx21,Tec,Ticam1,Tlr7,Tlr8,Tnfrsf13c,Traf5,Vav1,X…	NA	NA	NA	NA	Bach2,Cd84,Dusp4,Fli1,Ggta1,Gimap5,Id3,Ikzf1,Il21r,Il4ra,Irf2,Itpkb,Klra10,Lta,Ltb,Lyn,Nfkbia,Nos2,Plcg2,Tec,Tlr7,Tlr8,Tnf	NA	NA	NA	NA
Mouse Phenotype	decreased leukocyte cell number	0		0					7.34976e-267		2.63677e-167	0		AI848100,Ada,Adam10,Adam17,Aff1,Aim2,Akt1,Akt3,Ankrd11,Apc,Apoe,Arhgdia,Arhgdib,Arhgef1,Arid3a,B2m,B9d2,Bak1,Batf,Batf3,Bax,Bcl10,Bcl11a,Bcl3,Bik,Birc2,Birc3,Birc5,Braf,Bst1,Casp3,Cbfa2t3,Ccl11,Ccl2,Ccl25,Ccl3,Ccl5,Ccnd1,Ccr1,Ccr10,Ccr2,Ccr3,Ccr4,Ccr7,Cd19,Cd22,Cd247,Cd24a,Cd28,Cd34,Cd3d,Cd3e,Cd3g,Cd44,Cd5l,Cd72,Cd74,Cd79a,Cd80,Cd81,Cd83,Cd84,Cebpa,Cebpb,Cebpe,Cerk,Cflar,Chd2,Chst3,Chuk,Cks1b,Cle…	NA	2010002N04Rik,AI848100,Ada,Adam10,Aff1,Ankrd11,Arhgap15,Arhgef6,Arid3a,Arid4b,Arntl,Asxl1,B2m,B9d2,Bcl10,Bcl11a,Bik,Birc2,Birc3,Blk,Bnip3l,Bst1,C3,Casp3,Cbfa2t3,Cbl,Ccr1,Ccr10,Ccr2,Ccr3,Ccr7,Cd19,Cd247,Cd24a,Cd274,Cd40lg,Cd44,Cd47,Cd80,Cd81,Cebpb,Cerk,Chi3l1,Chst3,Clec4e,Col10a1,Cpa3,Cr1l,Crlf2,Csf2rb,Ctcf,Ctla4,Ctsd,Dapp1,Dck,Dffb,Diap1,Dkc1,Dll4,Drosha,Dtx1,E2f1,Ebi3,Erg,Esr2,Ewsr1,Fasl,Fastk,F…	NA	NA	NA	NA	Akt1,Bach2,Bcl11a,Ccl3,Ccl5,Cd84,Cebpb,Chst3,Cnn2,Csf3r,Dock8,Elk4,Ets1,Fli1,Flt3,Fyb,Ggta1,Gimap1,Gimap5,Gsx1,H2-D1,Hivep3,Id3,Ier3,Ikzf1,Il21r,Il4ra,Irf2,Itgb3,Itpkb,Klf2,Klhl6,Lgals9,Lta,Ltb,Lyn,Mdm4,Myh9,Nfkbia,Nos2,Notch1,Pik3r1,Plcg2,Prkcq,Rgs1,Runx3,Serpinb2,Sin3b,Slc46a2,Socs1,Sp3,Sqstm1,Tec,Tlr7,Tlr8,Tnf,Txnip,Vsig4,Zfp36l2	NA	2010002N04Rik,AI848100,Aim2,Ankrd11,Arid3a,Bbc3,Cbfa2t3,Ccr1,Ccr2,Ccr3,Cd47,Chst3,Csf2rb,Dapp1,Fasl,Gata1,Ggta1,Id3,Il2rb,Klf13,Lgals9,Lyl1,Mtf1,Nos2,Pim2,Ptpn22,Ptprj,Rfx5,Runx1,Runx3,St3gal1,Suv420h2,Thoc5,Tnfrsf13c,Xrcc6	AI848100,Ada,Aff1,Aim2,Akt1,Ankrd11,Apoe,Arhgap15,Arhgdib,Arhgef6,Arid4a,Arid4b,Arntl,Atm,B2m,B9d2,Bak1,Batf3,Bax,Bcl10,Bcl2l11,Bik,Birc2,Birc3,Birc5,Bmpr1a,C3ar1,Casp3,Cbfa2t3,Cbl,Ccna2,Ccr1,Ccr10,Ccr2,Ccr3,Ccr7,Cd19,Cd247,Cd24a,Cd274,Cd40lg,Cd44,Cd47,Cd72,Cds2,Cebpb,Cebpe,Cerk,Cflar,Chd2,Chd4,Chek2,Chst3,Cks1b,Clec4e,Cpa3,Csf1,Csf2rb,Csf3,Csf3r,Csk,Ctcf,Ctsd,Ctsl,Cx3cl1,Cx3cr1,Cxcl15,Cyp1a2,Dap…	NA
Mouse Phenotype	decreased lymphocyte cell number	0		0					5.63463e-219			0		Ada,Adam10,Adam17,Aff1,Aim2,Akt1,Akt3,Apc,Apoe,Arhgdia,Arhgdib,Arhgef1,Arid3a,B2m,B9d2,Bak1,Batf,Batf3,Bax,Bcl10,Bcl11a,Bcl3,Bik,Birc2,Birc3,Birc5,Braf,Bst1,Casp3,Cbfa2t3,Ccl2,Ccl25,Ccl5,Ccnd1,Ccr10,Ccr2,Ccr4,Ccr7,Cd19,Cd22,Cd247,Cd24a,Cd28,Cd3d,Cd3e,Cd3g,Cd5l,Cd72,Cd74,Cd79a,Cd80,Cd81,Cd83,Cd84,Cflar,Chd2,Chst3,Chuk,Cks1b,Clec4e,Col10a1,Cops5,Cpa3,Cr1l,Crip3,Csf1r,Ctcf,Cx3cr1,Cxcl16,Cxcr4,Cxcr7,…	NA	Ada,Adam10,Aff1,Arhgap15,Arhgef6,Arid3a,Arid4b,Arntl,Asxl1,B2m,B9d2,Bcl10,Bcl11a,Bik,Birc2,Birc3,Blk,Bnip3l,Bst1,Casp3,Cbfa2t3,Cbl,Ccr10,Ccr2,Ccr7,Cd19,Cd247,Cd24a,Cd274,Cd40lg,Cd47,Cd80,Cd81,Chi3l1,Chst3,Clec4e,Col10a1,Cpa3,Cr1l,Crlf2,Ctcf,Ctla4,Ctsd,Dapp1,Dck,Dffb,Diap1,Dkc1,Dll4,Drosha,Dtx1,E2f1,Ebi3,Erg,Esr2,Ewsr1,Fasl,Fbxo30,Flt3,Foxp3,Fyb,Fyn,Gadd45a,Galr2,Gata1,Gata3,Gfi1,Ggta1,Git2,Gmnn,G…	NA	NA	NA	NA	Akt1,Bach2,Bcl11a,Ccl5,Cd84,Chst3,Dock8,Elk4,Ets1,Fli1,Flt3,Fyb,Ggta1,Gimap1,Gimap5,Gsx1,H2-D1,Hivep3,Id3,Ier3,Ikzf1,Il21r,Il4ra,Irf2,Itpkb,Klf2,Klhl6,Lgals9,Lta,Ltb,Lyn,Myh9,Nfkbia,Notch1,Pik3r1,Plcg2,Prkcq,Rgs1,Runx3,Serpinb2,Slc46a2,Socs1,Sp3,Tec,Tlr7,Tlr8,Tnf,Txnip,Vsig4	NA	NA	Ada,Aff1,Aim2,Akt1,Apoe,Arhgap15,Arhgdib,Arhgef6,Arid4a,Arid4b,Arntl,Atm,B2m,B9d2,Bak1,Batf3,Bax,Bcl10,Bcl2l11,Bik,Birc2,Birc3,Birc5,C3ar1,Casp3,Cbfa2t3,Cbl,Ccr10,Ccr2,Ccr7,Cd19,Cd247,Cd24a,Cd274,Cd40lg,Cd47,Cd72,Cds2,Cflar,Chd2,Chd4,Chek2,Chst3,Cks1b,Clec4e,Cpa3,Csk,Ctcf,Ctsd,Ctsl,Cx3cr1,Dapp1,Diap1,Dicer1,Dkc1,Dll4,Drosha,Dtx1,E2f4,Ebi3,Erg,Esr2,Ets1,Ewsr1,Fadd,Fasl,Fli1,Flt3,Flt3l,Foxn1,Fyb,Ga…	NA
Mouse Phenotype	decreased mature B cell number	0							7.01627e-108			0		Adam10,Aff1,Apoe,Arhgdia,Arhgdib,Arhgef1,Arid3a,Bak1,Batf,Bax,Bcl10,Birc2,Birc3,Bst1,Cd19,Cd22,Cd72,Cd79a,Cd81,Cd84,Chuk,Cxcr4,Cxcr7,Dapp1,Dll1,Dock2,Dock8,Dtx1,Eef1a2,Ets1,Ewsr1,Fli1,Flt3,Foxo1,Ggta1,Gimap1,Gimap5,Git2,Gna13,Grb2,Igll1,Ikzf1,Il5ra,Il6st,Inpp5d,Irf2,Irf8,Lta,Ltb,Lyn,Maml1,Mbl2,Mcl1,Mcm3ap,Msh2,Msi2,Myb,Myd88,Nfkbia,Notch2,Pax5,Pbx1,Pdcd1,Pfdn1,Pik3ap1,Pik3r1,Plcl2,Pou2af1,Ppp2r3c…	NA	NA	NA	NA	NA	NA	Bach2,Cd84,Dock8,Ets1,Fli1,Flt3,Ggta1,Gimap1,Gimap5,Ikzf1,Irf2,Klhl6,Lta,Ltb,Lyn,Nfkbia,Pik3r1,Plcg2,Rgs1,Tlr7,Tlr8,Tnf	NA	NA	Aff1,Apoe,Arhgdib,Arhgef6,Arntl,Bak1,Bax,Bcl10,Bcl2l11,Birc2,Birc3,Cd19,Cd72,Dapp1,Dicer1,Dtx1,Ets1,Ewsr1,Fli1,Flt3,Ggta1,Git2,Gna13,Gpr183,Grb2,Igll1,Ikzf1,Ikzf3,Il7r,Inpp5d,Irf2,Irf8,Klhl6,Klhl7,Ltbr,Maml1,Mcl1,Mcm3ap,Msi2,Myb,Myd88,Nfkb1,Nkx3-1,Pbx1,Pfdn1,Pik3ap1,Pik3r1,Plcg2,Ppp2r3c,Prkcd,Ptpn6,Ptprj,Rac2,Rgs1,Runx1,Sash3,Sema4d,Sfpi1,Slc3a2,Tcf3,Tnfrsf13c,Traf2,Vav1,Vav2,Vav3,Vpreb1,Xrcc6	NA
Mouse Phenotype	decreased single-positive T cell number	0		0								0		Adam10,Aff1,Apoe,B2m,B9d2,Batf,Bcl11a,Ccl5,Ccnd1,Ccr2,Ccr7,Cd247,Cd28,Cd3d,Cd3e,Cd3g,Cd74,Cd83,Cd84,Cflar,Cops5,Cr1l,Ctcf,Diap1,Dll1,Dock2,Ebi3,Elavl1,Elk4,Ets1,Fadd,Fbxo30,Foxn1,Foxo1,Gem,Gimap1,Gimap5,Git2,Gpr30,Grap2,Grb2,H2-Aa,H2-Ab1,H2-D1,H2-K1,Hcst,Id3,Ifngr1,Il21r,Il4ra,Il5ra,Irf1,Itgam,Itgb7,Itpkb,Lat,Lepr,Map3k3,Mcl1,Mpz,Msi2,Myb,Myh9,Nfatc2ip,Nfe2l2,Nfkbia,Notch1,Nr3c1,Pbx1,Pdcd1,Pdcd1l…	NA	Adam10,Aff1,Arhgef6,Asxl1,B2m,B9d2,Bcl11a,Cbl,Ccr2,Ccr7,Cd247,Cd274,Chi3l1,Cr1l,Crlf2,Ctcf,Ctla4,Diap1,Dll4,Drosha,Ebi3,Esr2,Fbxo30,Foxp3,Fyn,Gata3,Git2,Gmnn,Grap2,Grb2,H2-K1,Icos,Id3,Il21r,Il2rb,Il2rg,Il4ra,Irf1,Itga4,Itgb2,Itpkb,Lat,Lcp2,Lepr,Map3k3,Mcl1,Mpz,Msi2,Myb,Myh9,Nbn,Nfatc2ip,Nfatc3,Nfkb1,Notch1,Nr3c1,Nup98,Pdcd1lg2,Ppm1d,Psmb11,Ptcra,Rag1,Rfx5,Rhoh,Rnf8,Rpl22,Runx1,Runx3,Sema4d,Sfpi1,…	NA	NA	NA	NA	NA	NA	NA	Aff1,Apoe,Arhgef6,Atm,B2m,B9d2,Cbl,Ccr2,Ccr7,Cd247,Cd274,Cflar,Csk,Ctcf,Ctsl,Diap1,Dll4,Drosha,Ebi3,Esr2,Ets1,Fadd,Foxn1,Gem,Git2,Grap2,Grb2,H2-Aa,H2-Ab1,Htra2,Id3,Il21r,Il2rb,Il4ra,Il7r,Itga4,Itgb2,Itgb7,Itk,Lat,Lcp2,Lep,Lepr,Map3k3,Mcl1,Mpz,Msi2,Myb,Myh9,Nfatc2ip,Nfatc3,Nfe2l2,Nfkb1,Notch1,Nr3c1,Pbx1,Pdcd1lg2,Pla2g10,Plcg1,Prnp,Psmb8,Psmb9,Ptcra,Rfx5,Rnf8,Rpl22,Runx1,Runx3,Sema4d,Sfpi1,Sharpin,…	NA
Mouse Phenotype	decreased susceptibility to autoimmune disorder	0							6.35657e-76					Acan,B2m,B9d2,BC096441,Batf,Ccl2,Ccr2,Ccr8,Cd19,Cd28,Cd38,Cd44,Cd69,Cd74,Cd80,Cdk4,Cfb,Clec5a,Cx3cr1,Cxcr2,Cxcr4,Dnase1,Dusp2,Fadd,Fcer1g,Fcgr1,Fcgr3,H2-Ab1,H2-T23,Hc,Hif1a,Icam1,Ifnar1,Ifngr1,Il17f,Il21r,Il6,Ins1,Irf1,Ksr1,Lin9,Lta,Lyn,Mapk14,Mmp9,Mog,Myd88,Ndst2,Ndufaf1,Pdcd1,Pla2g4a,Plau,Prf1,Prkcq,Ptgs1,Ptgs2,Rftn1,S1pr1,Sell,Skap2,Socs1,Spn,Stat4,Stat6,Stk17b,Tgfb1,Tlr9,Tnf,Tpsab1,Tpsb2,Tyro…	NA	NA	NA	NA	NA	NA	Alox5ap,Cd69,Dusp2,Il12a,Il21r,Ksr1,Lta,Lyn,Ncf1,Pla2g4a,Plcg2,Prkcq,Socs1,Stat4,Tnf	NA	NA	NA	NA
Mouse Phenotype	decreased T cell number	0		0					6.37064e-150			0		Ada,Adam10,Adam17,Aff1,Akt1,Akt3,Apc,Apoe,Arhgdia,Arhgdib,B2m,B9d2,Batf,Batf3,Bcl10,Bcl11a,Birc5,Braf,Casp3,Ccl25,Ccl5,Ccnd1,Ccr10,Ccr2,Ccr7,Cd19,Cd247,Cd28,Cd3d,Cd3e,Cd3g,Cd5l,Cd74,Cd79a,Cd80,Cd83,Cd84,Cflar,Chst3,Col10a1,Cops5,Cpa3,Cr1l,Crip3,Ctcf,Cxcl16,Cxcr4,Cyp27b1,Dck,Dffb,Diap1,Dll1,Dmtf1,Dntt,Dock2,Dock8,Ebi3,Elavl1,Elk4,Ets1,Ewsr1,Fadd,Fbxo30,Fcer1g,Fli1,Flt3,Flt3l,Fos,Foxn1,Foxo1,Gem,Gi…	NA	Ada,Adam10,Aff1,Arhgef6,Arid4b,Asxl1,B2m,B9d2,Bcl10,Bcl11a,Casp3,Cbl,Ccr10,Ccr2,Ccr7,Cd19,Cd247,Cd274,Cd40lg,Cd47,Cd80,Chi3l1,Chst3,Col10a1,Cpa3,Cr1l,Crlf2,Ctcf,Ctla4,Ctsd,Dck,Dffb,Diap1,Dll4,Drosha,E2f1,Ebi3,Esr2,Ewsr1,Fbxo30,Flt3,Foxp3,Fyb,Fyn,Gata3,Gfi1,Git2,Gmnn,Grap2,Grb2,H2-K1,Hrh1,Icos,Id3,Ier3,Ikzf1,Il21r,Il2rb,Il2rg,Il4ra,Inpp5d,Irf1,Irf2,Itga4,Itgav,Itgb2,Itpkb,Jak1,Kit,Klf13,Klf2,Lat,L…	NA	NA	NA	NA	Akt1,Bcl11a,Ccl5,Cd84,Chst3,Dock8,Elk4,Ets1,Fli1,Flt3,Fyb,Gimap1,Gimap5,H2-D1,Hivep3,Id3,Ier3,Ikzf1,Il21r,Il4ra,Irf2,Itpkb,Klf2,Lgals9,Lta,Myh9,Nfkbia,Notch1,Prkcq,Runx3,Slc46a2,Socs1,Sp3,Tnf,Txnip	NA	NA	Ada,Aff1,Akt1,Apoe,Arhgdib,Arhgef6,Arid4a,Arid4b,Atm,B2m,B9d2,Batf3,Bcl10,Bcl2l11,Birc5,Casp3,Cbl,Ccr10,Ccr2,Ccr7,Cd19,Cd247,Cd274,Cd40lg,Cd47,Cflar,Chd4,Chek2,Chst3,Cpa3,Csk,Ctcf,Ctsd,Ctsl,Diap1,Dicer1,Dll4,Drosha,E2f4,Ebi3,Esr2,Ets1,Ewsr1,Fadd,Fli1,Flt3,Flt3l,Foxn1,Fyb,Gem,Gfi1,Git2,Grap2,Grb2,H2-Aa,H2-Ab1,H2afx,Hivep3,Hr,Hrh1,Htra2,Id3,Ier3,Ikzf1,Il21r,Il2rb,Il4ra,Il6,Il7r,Inpp5d,Irf2,Irf8,Itg…	NA
Mouse Phenotype	decreased thymocyte number	0		0								0		Apc,Bcl10,Birc5,Braf,Casp3,Cd247,Cd3g,Cd5l,Col10a1,Cops5,Crip3,Cxcr4,Dmtf1,Elk4,Ets1,Fcer1g,Fli1,Fos,Foxn1,Gem,Gimap1,Gimap5,Grap2,Grb2,Ikzf1,Il6st,Ing1,Inpp5d,Jak1,Kit,Klf13,Lat,Maml1,Map3k3,Mcl1,Me2,Mll5,Msi2,Myb,Nfkbia,Notch1,Notch3,Ptcra,Rassf5,Rnf8,Runx1,Sfpi1,Socs1,Sos1,Srf,Tacc3,Tcf12,Themis,Traf2,Trp53,Vav1,Vav2,Vav3,Xrcc6	NA	Bcl10,Casp3,Cd247,Col10a1,Dll4,Drosha,Foxp3,Fyb,Fyn,Gata3,Gfi1,Gmnn,Grap2,Grb2,Ikzf1,Il2rg,Inpp5d,Jak1,Kit,Klf13,Lat,Lcp2,Map3k3,Mcl1,Mdm2,Me2,Mll5,Msi2,Myb,Nfatc3,Notch1,Ppp3r1,Ptcra,Rnf8,Runx1,Sfpi1,Stat3,Stat5b,Themis,Trp53,Vav1,Xrcc6	NA	NA	NA	NA	NA	NA	NA	Atm,Bcl10,Birc5,Casp3,Cd247,Dicer1,Dll4,Drosha,E2f4,Ets1,Fli1,Foxn1,Fyb,Gem,Gfi1,Grap2,Grb2,Ikzf1,Il7r,Inpp5d,Itk,Jak1,Klf13,Lat,Lcp2,Maml1,Map3k3,Mcl1,Me2,Msi2,Myb,Nfatc3,Notch1,Notch3,Prnp,Ptcra,Ptk2,Rnf8,Runx1,Sfpi1,Socs1,Stat3,Tacc3,Themis,Traf2,Twsg1,Vav1,Vav2,Vav3,Was,Xrcc6	NA
Mouse Phenotype	enlarged lymph nodes	0										0		Apoe,Axl,B2m,BC096441,Bak1,Bax,Birc2,Birc3,Ccr2,Cd19,Cd247,Cdkn2a,Cdkn2b,Cebpb,Cebpe,Chd2,Cxcr2,Cyp27b1,Def6,Dok2,Fadd,Fasl,Fcgr2b,Foxo1,Gna13,H2-Aa,Ifnar1,Ikzf1,Il2ra,Il5ra,Il6st,Inpp5d,Irf2,Irf8,Itch,Lat,Lat2,Lbr,Lyn,Mdm4,Mgat2,Msmb,Nfe2l2,Nr4a1,Pdcd1lg2,Prkcd,Psen1,Pten,Ptpn6,Rassf5,Rc3h1,Rxra,Sele,Sell,Selp,Sh2b3,Smad3,Socs1,Spna1,Tank,Tbxa2r,Tec,Tgfb1,Tlr9,Traf2,Tyro3,Zc3h12a,Zfp36,Zfp36l1,Z…	NA	NA	NA	NA	NA	NA	NA	NA	NA	Apoe,Axl,B2m,BC096441,Bak1,Bax,Bcl2l11,Birc2,Birc3,Cbl,Ccr2,Cd19,Cd247,Cebpb,Cebpe,Chd2,Csf2rb,Csf2rb2,Ctsl,Def6,Dicer1,Dok1,Drosha,Esr2,Fadd,Fasl,Fcgr2b,Foxo3,Gna13,H2-Aa,Ifnar1,Ikzf1,Il2rb,Inpp5d,Irf2,Irf8,Itgb2,Lat,Mdm4,Msmb,Myc,Nfe2l2,Nfkb1,Nkx3-1,Pdcd1lg2,Plcg2,Prkcd,Psen1,Psen2,Ptpn6,Rxra,Smad3,Socs1,Spna1,Tec,Tgfb1,Traf2,Ung,Zc3h12a,Zfp36,Zfp36l1,Zfp36l2	NA
Mouse Phenotype	enlarged spleen	0		0					1.1127e-133	4.12149561760768e-320		0		Adam17,Agpat2,Apc,Apoe,Arhgef1,Axl,B2m,B4galt1,BC096441,Bak1,Bax,Bik,Bin3,Birc2,Birc3,Braf,C4b,Capn10,Cbfa2t3,Ccnd1,Ccr2,Ccr7,Cd19,Cd247,Cdkn1b,Cdkn2a,Cdkn2b,Cebpa,Cebpb,Cflar,Chd2,Csf1r,Ctsa,Cxcr2,Dbnl,Dck,Def6,Diap1,Dnase1,Dok2,Dtx1,Dusp6,E2f2,Egr1,Eif2c2,Erap1,Exoc6,Fadd,Fasl,Fcer1g,Fcgr2b,Fech,Fli1,Flt3,Fshr,Gadd45b,Git2,Glb1,Gpi1,Gpr132,Hcst,Hk1,Hmga1,Hsh2d,Ifnar1,Ikzf1,Il10rb,Il2ra,Il5ra,Il…	NA	Abca1,Add2,Agpat2,Arid4b,Asxl1,Axl,B2m,B4galt1,BC096441,Bik,Birc2,Birc3,Blk,Bnip3l,C3,C4b,Cbfa2t3,Cbl,Ccr2,Ccr7,Cd19,Cd247,Cd47,Cdkn1b,Cebpb,Ctla4,Ctsg,Dck,Diap1,Dkc1,Dnase1,Drosha,Dtx1,E2f2,Egr1,Eif2c2,Epb4.2,Esr2,Exoc6,Fads2,Fasl,Fcgr2b,Fech,Fen1,Flt3,Foxo3,Foxp3,Fyn,Gata1,Git2,Hbb-b1,Hsh2d,Ifnar1,Ikzf1,Il10rb,Il2rb,Il2rg,Il4,Inpp5d,Itgb2,Itgb3,Kit,Klf13,Lat,Lat2,Lcp2,Lepr,Ltbp4,Mdm2,Myb,Myc,Nc…	NA	NA	NA	NA	Agpat2,Cdkn2a,Cdkn2b,Cebpb,E2f2,Egln3,Fads2,Fli1,Flt3,Hbb-b1,Hmga1,Hsh2d,Ikzf1,Itgb3,Lta,Ltb,Lyn,Mafk,Mdm4,Notch1,Plcg2,Prkcq,Tec,Tlr8,Tnf,Tom1l2,Zc3h12a,Zfp36l1,Zfp36l2	Add2,B2m,B4galt1,Bik,Birc2,Birc3,Cbfa2t3,Cd47,Dnase2a,Egr1,Eif2c2,Epb4.2,Fads2,Fech,Fen1,Foxo3,Gata1,Hbb-b1,Hk1,Ifnar1,Ikzf1,Il10rb,Il2rb,Kcnn4,Klf1,Klf13,Lat2,Mafk,Mdm2,Mxi1,Myc,Nkx3-1,Pklr,Ppm1d,Prkaa1,Prkcd,Rxra,Sac3d1,Sipa1,Slc20a1,Slc25a37,Slc4a1,Spna1,Spnb1,Stk11,Tmprss6,Trp53,Tspan33	NA	Abca1,Add2,Agpat2,Apoe,Arid4a,Arid4b,Atm,Axl,B2m,B4galt1,BC096441,Bak1,Bax,Bcl2l11,Bik,Birc2,Birc3,Cbfa2t3,Cbl,Ccne1,Ccr2,Ccr7,Cd19,Cd247,Cd47,Cdkn1b,Cebpb,Cflar,Chd2,Ctsg,Def6,Diap1,Dicer1,Dkc1,Dok1,Drosha,Dtx1,E2f2,Egln3,Egr1,Eif2c2,Esr2,Exoc6,Fadd,Fads2,Fasl,Fcgr2b,Fech,Fli1,Flt3,Foxo3,Gadd45b,Gata1,Git2,Gpi1,Hbb-b1,Hk1,Hmga1,Hp,Hsh2d,Ifnar1,Ikzf1,Ikzf3,Il10rb,Il2rb,Il4,Inpp5d,Irf8,Itgb2,Itgb3…	NA
Mouse Phenotype	extramedullary hematopoiesis	0							9.25578e-72		1.65787e-64	0		Ada,Adam17,Amhr2,Arhgef1,B4galt1,Bin3,Braf,Cbfa2t3,Cbs,Cd19,Cdk4,Cdkn2a,Cdkn2b,Cebpa,Cebpb,Cebpe,Chd2,Csf1,Ctnnb1,Cxcr2,Dck,Diap1,Dok2,Eif2ak1,Erap1,Flt3,Gimap5,Git2,Ikzf1,Il10rb,Lbr,Lyn,Mafk,Mzf1,Nfkbia,Notch1,Notch2,Notch3,Prdx1,Pten,Relb,Runx1,Sele,Sell,Selp,Sfpi1,Sh2b3,Sharpin,Sipa1,Smad3,Socs1,Sos1,Spna1,Tpp2,Trp53,Ttc7,Vegfa,Zfp36,Zfp36l2,Zfpm1	NA	NA	NA	NA	NA	NA	Cdkn2a,Cdkn2b,Cebpb,Egln3,Flt3,Gimap5,Hbb-b1,Ikzf1,Itgb3,Lyn,Mafk,Nfkbia,Notch1,Socs1,Zfp36l2	NA	Bin3,Cbfa2t3,Gata1,Lbr,Lgmn,Mafk,Ptprj,Runx1,Spna1,Tmprss6,Zfpm1	Ada,Arid4a,Arid4b,B4galt1,Cbfa2t3,Cbl,Cbs,Ccne1,Cd19,Cebpb,Cebpe,Chd2,Csf1,Ctsg,Diap1,Dicer1,Dkc1,Dok1,Egln3,Eif2ak1,Flt3,Gata1,Git2,Hbb-b1,Ikzf1,Il10rb,Itgb3,Itpa,Lgmn,Ly6a,Mafk,Nfkb1,Notch1,Notch3,Prdx1,Prkag1,Pstpip2,Ptch2,Ptprj,Relb,Runx1,Sfpi1,Sharpin,Slc11a2,Smad3,Socs1,Spna1,Tet2,Tmprss6,Tnfrsf1a,Tspan33,Zfp36,Zfp36l2,Zfpm1	NA
Mouse Phenotype	hematopoietic system phenotype	0		0					0	0	0	0		1190003J15Rik,AI848100,Abi1,Ace,Ada,Adam10,Adam17,Adamts13,Adipoq,Adrb2,Aff1,Agpat2,Aim2,Akt1,Akt3,Amhr2,Ank,Ankrd11,Ap3d1,Apc,Apoa1,Apoa4,Apoc3,Apoe,Appl1,Aprt,Arf6,Arhgdia,Arhgdib,Arhgef1,Arid1a,Arid3a,Arsa,Asb1,Atcay,Atp7b,Axl,B2m,B4galt1,B9d2,BC096441,Bag4,Bak1,Batf,Batf3,Bax,Bcl10,Bcl11a,Bcl3,Becn1,Bik,Bin3,Birc2,Birc3,Birc5,Braf,Brca2,Bst1,C4b,Cacna1a,Cap1,Capn10,Carm1,Casp3,Casp9,Cbfa2t3,C…	NA	1190003J15Rik,2010002N04Rik,AI848100,Abca1,Abcc4,Abcg2,Abhd5,Abi1,Ace,Ada,Adam10,Add1,Add2,Adrb2,Aff1,Agpat2,Agtr1a,Alas2,Alox5,Amhr2,Ank,Ankrd11,Apcs,Aplf,Aprt,Aqp2,Aqp9,Arhgap15,Arhgef12,Arhgef6,Arid3a,Arid4b,Arntl,Asxl1,Atg5,Avpr2,Axl,B2m,B3gnt2,B4galt1,B9d2,BC096441,Bag4,Bank1,Bcl10,Bcl11a,Becn1,Bik,Birc2,Birc3,Blk,Bnip3l,Bst1,Btrc,C1galt1,C3,C4b,Cacna2d2,Cap1,Casp3,Cbfa2t3,Cbl,Ccnd2,Ccr1,Ccr…	NA	NA	NA	NA	Adora2a,Agpat2,Akt1,B3gnt2,Bach2,Bcl11a,Ccl3,Ccl5,Cd276,Cd48,Cd69,Cd84,Cdkn2a,Cdkn2b,Cebpb,Chst3,Clec1b,Clec2d,Cnn2,Csf3r,Dock8,E2f2,Egln3,Elk4,Ern1,Ets1,F2rl2,Fads2,Fli1,Flt1,Flt3,Fyb,Gapdh,Gbx2,Ggta1,Gimap1,Gimap5,Gnaq,Gnaz,Gsx1,H2-D1,Hbb-b1,Hivep3,Hmga1,Hps5,Hsh2d,Icam2,Id3,Ier3,Ikzf1,Il21r,Il4ra,Irf2,Itgb3,Itpkb,Klf2,Klhl6,Klra17,Ksr1,Lgals9,Lta,Ltb,Ly9,Lyn,Mafk,Mdc1,Mdm4,Myh9,Nfkbia,Nos2,Not…	Abcg2,Add2,Adrb2,Aim2,Alas2,Ankrd11,Aprt,Arhgef12,B2m,B4galt1,Bcl10,Bcl11a,Bik,Birc2,Birc3,Cacna2d2,Carm1,Cbfa2t3,Cd24a,Cd47,Cd59a,Cd59b,Cerk,Cno,Comt,Crh,Csf2rb,Csf2rb2,Cul4a,Cx3cl1,Cx3cr1,Dapp1,Dnase2a,Dph1,Dusp1,Egr1,Eif2c2,Epb4.2,Fads2,Fbxo30,Fech,Fen1,Fntb,Foxo3,Gadd45a,Gata1,Gfi1b,Gnai2,Gypa,Hba-a2,Hba-x,Hbb-b1,Hfe,Hist1h1c,Hist1h1d,Hist1h1e,Hk1,Hps6,Hr,Hyal2,Icam1,Icam4,Ier3,Ifnar1,Ifnar2,…	2010002N04Rik,AI848100,Abcc4,Aim2,Ankrd11,Aprt,Arid3a,Bbc3,Bin3,Blm,Cbfa2t3,Ccr1,Ccr2,Ccr3,Ccr5,Cd47,Chst3,Creb3l1,Csf2rb,Csf2rb2,Dapp1,Dyrk3,E2f2,Epor,Fasl,Fzr1,Gata1,Gfi1b,Ggta1,Hlx,Id3,Ifngr2,Il2rb,Itga2b,Kiss1r,Klf13,Ksr1,Lbr,Lfng,Lgals9,Lgmn,Lyl1,Mafk,Mpo,Mtf1,Mxd1,Naglu,Nfe2,Nos2,Pim2,Ppp1r15a,Psap,Ptpn22,Ptprj,Rabgef1,Rap1a,Rfx5,Runx1,Runx3,Sap30bp,Sh2d2a,Spna1,St3gal1,Sucnr1,Suv420h2,Tac4…	AI848100,Abca1,Abcc4,Abcg1,Abcg2,Abhd5,Ace,Ada,Add1,Add2,Adrb2,Aff1,Agpat2,Aim2,Akt1,Alas2,Alox5,Ank,Ankrd11,Aplf,Apoa1,Apoa4,Apoc3,Apoe,Aprt,Aqp1,Aqp9,Ar,Arf6,Arhgap1,Arhgap15,Arhgdib,Arhgef12,Arhgef6,Arid4a,Arid4b,Arntl,Arsa,Asb1,Atm,Axl,B2m,B3gnt2,B4galt1,B9d2,BC096441,Bak1,Batf3,Bax,Bcl10,Bcl2l11,Becn1,Bik,Birc2,Birc3,Birc5,Blm,Bmpr1a,C1galt1,C3ar1,C5ar1,Cacna1a,Cacna2d2,Cap1,Capns1,Casp3,Cas…	NA
Mouse Phenotype	immune system phenotype	0		0					0	0	0	0		2610301G19Rik,AI848100,Abcb4,Abcc1,Abi1,Acan,Ace,Ada,Adam10,Adam17,Adamts13,Adh5,Adipoq,Adora2b,Adprh,Adrb2,Aff1,Agpat2,Agt,Agtr1b,Aim2,Akt1,Akt3,Als2,Amhr2,Angptl4,Ank,Ankrd11,Aoc3,Apc,Apoa1,Apoa4,Apoc3,Apoe,Appl1,Aprt,Arhgdia,Arhgdib,Arhgef1,Arid3a,Arl3,Arrb2,Arsa,Asb1,Atcay,Atf3,Atg9a,Atp7a,Atp7b,Axl,B2m,B4galt1,B9d2,BC096441,Bag4,Bak1,Batf,Batf3,Bax,Bcl10,Bcl11a,Bcl3,Becn1,Bik,Bin3,Birc2,Birc…	NA	2010002N04Rik,AI848100,Abca1,Abcc1,Abcc4,Abhd5,Abi1,Ace,Ada,Adam10,Adamts5,Add2,Adora3,Adprh,Adrb2,Aff1,Agpat2,Agtr1a,Agtr1b,Aimp1,Alox5,Als2,Amhr2,Ank,Ankrd11,Anxa5,Aoc3,Apcs,Aplf,Apobec3,Aprt,Aqp3,Aqp9,Arhgap15,Arhgef12,Arhgef6,Arid3a,Arid4b,Arntl,Asxl1,Atg5,Atg9a,Atp7a,Axl,B2m,B3gnt2,B4galt1,B9d2,BC096441,Bag4,Bank1,Bbs4,Bcl10,Bcl11a,Becn1,Bik,Birc2,Birc3,Blk,Bmp5,Bmx,Bnip3l,Bst1,Btrc,C1galt1,…	NA	NA	NA	NA	Adcy9,Adora2a,Agpat2,Agt,Akt1,Alox5ap,B3gnt2,Bach2,Bcl11a,Bmp7,Ccl3,Ccl5,Cd244,Cd276,Cd48,Cd69,Cd84,Cdkn2a,Cdkn2b,Cdsn,Cebpb,Chst3,Clec1b,Clec2d,Clec7a,Clec9a,Clic4,Cnn2,Cnr2,Cpb2,Csf3r,Ctsc,Dock8,Dusp2,Dusp4,E2f2,Egln3,Elk4,Epha1,Ern1,Ets1,F11r,F2r,Fads2,Fli1,Flot1,Flt1,Flt3,Fyb,Gbx2,Ggta1,Gimap1,Gimap4,Gimap5,Gnaq,Golm1,Gsx1,H2-D1,Hbb-b1,Hivep3,Hmga1,Hps5,Hsh2d,Icam2,Id3,Ier3,Ikzf1,Il12a,Il21r,…	Acp5,Add2,Adrb2,Aim2,Ankrd11,Apobec3,Aprt,Arhgef12,Atg9a,B2m,B4galt1,Bahd1,Bcl10,Bcl11a,Bik,Birc2,Birc3,Bmp7,Cacna2d2,Camk2g,Carm1,Cbfa2t3,Ccl17,Ccr8,Cd24a,Cd47,Cd59a,Cerk,Clic4,Comt,Creb3l3,Crh,Csf2rb,Csf2rb2,Cul4a,Cx3cl1,Cx3cr1,Dapp1,Darc,Dnase2a,Dusp1,Egr1,Eif2c2,Epb4.2,Fads2,Fah,Fbxo30,Fech,Fen1,Flot1,Fntb,Foxo3,Gadd45a,Gata1,Gfap,Gfi1b,Gnai2,Gnai3,Hbb-b1,Hdac6,Hfe,Hic1,Hist1h1c,Hist1h1d,Hist…	2010002N04Rik,2610301G19Rik,AI848100,Abcc4,Adora3,Aim2,Angptl4,Ankrd11,Aprt,Arid3a,Bbc3,Bin3,Blm,Bmp7,Cbfa2t3,Ccr1,Ccr2,Ccr3,Ccr5,Cd47,Chst3,Clic4,Cnr2,Csf2rb,Csf2rb2,Dapp1,Darc,E2f2,Epor,Fasl,Gata1,Gfi1b,Ggta1,Hdac6,Id3,Ifngr2,Iigp1,Il2rb,Itga2b,Itga3,Itgb4,Kiss1r,Klf13,Ksr1,Lbr,Lgals9,Lgmn,Lyl1,Mafk,Mcph1,Mpo,Msmb,Mtf1,Mxd1,Naglu,Ncf4,Nfe2,Nos2,Padi4,Pdlim2,Pim2,Ppp1r15a,Psap,Ptpn22,Ptprj,Rabge…	AI848100,Abca1,Abcb4,Abcc1,Abcc4,Abcg1,Abhd5,Ace,Acp5,Ada,Adamts5,Adcy9,Add2,Adm,Adora3,Adrb2,Aff1,Agpat2,Agtr1b,Ahi1,Aim2,Akt1,Alox5,Als2,Angptl4,Ank,Ankrd11,Aoc3,Aplf,Apoa1,Apoa4,Apoc3,Apoe,Aprt,Aqp3,Aqp9,Ar,Arhgap1,Arhgap15,Arhgdib,Arhgef12,Arhgef6,Arid4a,Arid4b,Arntl,Arsa,Asb1,Atf3,Atg9a,Atm,Atp7a,Axl,B2m,B3gnt2,B4galt1,B9d2,BC096441,Bahd1,Bak1,Batf3,Bax,Bcl10,Bcl2l11,Becn1,Bid,Bik,Birc2,Birc…	NA
Mouse Phenotype	increased B cell number	0										0		Adam10,Apoe,Arhgef1,B2m,Bak1,Bax,Bik,Birc2,Birc3,Bst1,Ccr2,Cd19,Cd22,Cd69,Cd72,Cd74,Cd79a,Cdkn2b,Cebpe,Chuk,Cr1l,Cxcr2,Def6,Dll1,Elf1,Ets1,Fadd,Fasl,Fli1,Foxn1,Foxo1,Fshr,Gadd45b,Gna13,Gp49a,Grb2,H2-Ab1,Ikzf1,Il6st,Inpp5d,Irf8,Kit,Lat,Lilrb3,Lilrb4,Lta,Mbl2,Mt1,Mt2,Myd88,Ncoa3,Nfkbia,Nlrp6,Notch1,Pdcd1,Pnp,Pou2af1,Ppp2r3c,Prf1,Prkcd,Ptch1,Pten,Ptpn6,Rassf5,Rgs1,S1pr2,Samsn1,Sema4d,Sfpi1,Sh2b2,Sh2…	NA	NA	NA	NA	NA	NA	NA	NA	NA	Abcg1,Apoe,Ar,B2m,Bak1,Bax,Bcl2l11,Bik,Birc2,Birc3,Ccr2,Cd19,Cd72,Cebpe,Def6,Dll4,Elf1,Esr2,Ets1,Fadd,Fasl,Fli1,Foxn1,Gadd45b,Gna13,Grb2,H2-Ab1,Ikzf1,Ikzf3,Il2rb,Il4,Inpp5d,Irf8,Itk,Lat,Ltbr,Mt1,Mt2,Myc,Myd88,Ncoa3,Nfatc3,Nfkb1,Nkx3-1,Notch1,Plcg2,Ppp2r3c,Prkcd,Ptpn6,Ptprj,Rgs1,Samsn1,Sema4d,Sfpi1,Sh2b2,Spna1,Ssbp2,Tcf3,Tec,Tet2,Tnfrsf13c,Tom1l2,Traf2,Ubash3a,Vav1,Vav2,Vav3,Vpreb1,Was,Zc3h12a	NA
Mouse Phenotype	increased classified tumor incidence	0										0		1190003J15Rik,2700078K21Rik,Abcb4,Aes,Akt1,Akt3,Amhr2,Apc,Atp2a2,Aurkb,B2m,Bard1,Bax,Becn1,Bin3,Braf,Brca2,Casc1,Ccnd1,Cd19,Cd34,Cd44,Cdk11b,Cdk4,Cdkn1b,Cdkn2a,Cdkn2b,Cdsn,Cdx2,Cebpa,Chd2,Chek1,Chuk,Cks1b,Ctnnb1,Cul9,Cxcr6,Cytip,Dgkd,Dmtf1,Dnd1,Dok2,Eef1a1,Egr1,Errfi1,Ewsr1,F2r,F3,Fasl,Fbxo30,Fgfr2,Flcn,Fli1,Fos,Foxm1,Foxn1,Foxo1,Fshr,Gli1,Gnai2,Gnmt,Grb2,H2afx,Hif1a,Hmga1,Hspa5,Ikzf1,Il12rb2,Il6…	NA	NA	NA	NA	NA	NA	NA	NA	NA	2700078K21Rik,Abcb4,Aes,Aip,Akt1,Ar,Arid4a,Arid4b,Atm,Aurkb,B2m,Bax,Becn1,Blm,Cd19,Cd44,Cdkn1b,Cdx2,Chd2,Chek2,Cks1b,Ctsg,Cxcr6,Dicer1,Dkc1,Dnd1,Dok1,Dok3,Egr1,Esr2,Ewsr1,F2r,Fasl,Fli1,Fntb,Foxn1,Foxo3,Fzr1,Gadd45a,Gli1,Gnai2,Gnmt,Gprc5a,Grb2,Gstp1,Gstp2,H2afx,Hic1,Hivep3,Hmga1,Hr,Hspa5,Htatip2,Id1,Ikzf1,Ikzf3,Il12rb2,Inpp5d,Iqgap1,Irf8,Kat5,Lass2,Ly6a,Lzts1,Mad1l1,Mapk14,Mapt,Mc1r,Mcm2,Mdm4,Men1…	NA
Mouse Phenotype	increased gland tumor incidence	0										0		2700078K21Rik,Adipoq,Akt1,Akt3,Amh,Amhr2,Apc,B2m,Bard1,Bax,Becn1,Braf,Brca2,Ccnd1,Cdk4,Cdkn1b,Cdkn2a,Cdkn2b,Chd2,Chek1,Ctnnb1,Cul9,Dmtf1,Dnd1,Eef1a1,Ets2,Ewsr1,F2r,Fbxo30,Foxo1,Fshr,Grb2,H2afx,Hspa5,Igf1r,Map2k7,Map3k1,Mcm3,Mcm4,Men1,Mmp9,Msh2,Msmb,Mtf1,Ncoa3,Nhej1,Per2,Pole,Pomc,Prdm2,Prdx1,Prf1,Ptch1,Pten,Ptgds,Rad52,Ret,Rfwd2,Rhoc,Rnf8,Runx1,Rxra,Sfpi1,Smad3,Ssbp2,Stk11,Tap1,Tgfbr2,Trp53,Vhl,W…	NA	NA	NA	NA	NA	NA	NA	NA	NA	2700078K21Rik,Aip,Akt1,Ar,Atm,B2m,Bax,Becn1,Blm,Cdkn1b,Chd2,Chek2,Dkc1,Dnd1,E2f4,Erbb2,Esr2,Ets2,Ewsr1,F2r,Foxo3,Fzr1,Grb2,H2afx,Hic1,Hspa5,Htatip2,Igf1r,Lzts1,Map3k1,Mcm2,Men1,Mmp11,Msmb,Mtf1,Ncoa3,Nhej1,Nkx3-1,Pold1,Prdx1,Ptch2,Ptgds,Rb1,Rfwd2,Rhoc,Rint1,Rnf8,Runx1,Rxra,Sfpi1,Smad1,Smad3,Ssbp2,Stat3,Stk11,Stk3,Tap1,Tbx21,Tnk1,Tom1l2,Trp73,Vhl,Xrcc6,Zfp36l1,Zfp36l2	NA
Mouse Phenotype	increased granulocyte number	0										0		Ada,Adam17,Arhgdia,Arhgdib,Atp7b,B4galt1,Bik,C4b,Casp3,Ccl2,Ccr2,Ccr3,Ccr4,Cd19,Cd97,Cflar,Csf1,Csf1r,Ctnnb1,Cxcl5,Cxcr2,Diap1,Dok2,Elavl1,Fasl,Fbn1,Fcgr3,Flt3,Flt3l,Foxn1,Fut4,Fut7,G6pc3,Gcnt4,Gimap5,Gnai2,Icam1,Ier3,Ikzf1,Il4ra,Il6st,Inpp5d,Irf8,Itgam,Kit,Lat,Lepr,Lgals3,Lyn,Mcl1,Mll1,Mll5,Mmp9,Mt1,Mt2,Nfkbia,Nr4a1,Pggt1b,Pgp,Plac8,Pomt1,Prex1,Prf1,Ptch1,Pten,Ptpn6,Rac2,Relb,Runx1,Sele,Sell,Sel…	NA	NA	NA	NA	NA	NA	NA	NA	NA	Abcg1,Ada,Arhgdib,Arid4a,Arid4b,Arntl,B4galt1,Bcl2l11,Bik,Casp3,Ccr2,Ccr3,Cd19,Cd97,Cflar,Csf1,Ctse,Ctss,Cxcl5,Diap1,Dok1,Drosha,Esr2,Fasl,Fcgr3,Flt3,Flt3l,Foxn1,Fut7,Gata1,Gcnt4,Gnai2,Id1,Ier3,Ikzf1,Il2rb,Il4,Il4ra,Inpp5d,Irak3,Irf8,Itgb2,Lat,Lepr,Lif,Ly6a,Mcl1,Mt1,Mt2,Nfkb1,Pgp,Plac8,Ptch2,Ptpn6,Rabgef1,Rac2,Rbp1,Relb,Runx1,Selplg,Sfpi1,Sharpin,Slc35c1,Slfn2,Smad3,Spna1,Stat3,Stat6,Tbx21,Tec,Ti…	NA
Mouse Phenotype	increased hematopoietic cell number	0	0	0					5.34687e-235	0		0		1190003J15Rik,Ace,Ada,Adam10,Adam17,Adipoq,Akt1,Akt3,Apc,Apoa1,Apoa4,Apoc3,Apoe,Arhgdia,Arhgdib,Arhgef1,Atp7b,Axl,B2m,B4galt1,B9d2,BC096441,Bak1,Bax,Bcl10,Bcl11a,Bcl3,Bik,Birc2,Birc3,Birc5,Brca2,Bst1,C4b,Casp3,Cbfa2t3,Ccl2,Ccr2,Ccr3,Ccr4,Ccr5,Ccr7,Cd19,Cd22,Cd247,Cd28,Cd3e,Cd44,Cd48,Cd69,Cd72,Cd74,Cd79a,Cd81,Cd97,Cdkn1b,Cdkn2a,Cdkn2b,Cebpe,Cerk,Cflar,Chd2,Chuk,Clec2d,Clic1,Col10a1,Cpa3,Cr1l,Csf1,…	1190003J15Rik,Abcg1,Ace,Add2,Akt1,Aqp1,Arhgdia,Bbc3,Bcl6b,Birc2,Birc3,Birc5,Cd47,Cd48,Cd97,Cnn2,Csf1,Ctsl,Dda1,Egln3,Eif2c2,Ets1,Fli1,Fos,Gna12,H2-D1,Hmox1,Ikzf1,Inpp5d,Klf2,Lta,Ltb,Map3k3,Mcm2,Mcm4,Me2,Mll5,Mt1,Mt2,Nfe2l2,Nlrp6,Notch2,Nr4a1,Pik3c2a,Ppia,Ppp2r3c,Psen1,Ptprj,Rhoh,Runx1,Rxra,Sfpi1,Sh2b2,Sharpin,Siglec1,Slx4,Src,Sykb,Tcf3,Tgfbr2,Tlr9,Tnf,Txnip,Ubash3a,Unc13d,Wasl,Zbtb7b,Zfp36,Zfpm1	1190003J15Rik,Ace,Ada,Adam10,Add1,Add2,Agtr1a,Arid4b,Arntl,Asxl1,Axl,B2m,B4galt1,B9d2,BC096441,Bank1,Bcl10,Bcl11a,Bik,Birc2,Birc3,Blk,Bnip3l,Bst1,C4b,Casp3,Cbfa2t3,Cbl,Ccr2,Ccr3,Ccr5,Ccr7,Cd19,Cd247,Cd274,Cd40lg,Cd44,Cd47,Cd59a,Cd59b,Cd81,Cd97,Cdkn1b,Cerk,Clic1,Col10a1,Cpa3,Cr1l,Ctcf,Ctla4,Ctnnb1,Ctsg,Dck,Dffb,Diap1,Dll4,Drosha,Dusp1,E2f1,E2f2,Egr1,Eif2c2,Epb4.2,Epor,Esr2,Ewsr1,Exoc6,Fasl,Fbn1,Fb…	NA	NA	NA	NA	Akt1,Bcl11a,Cd48,Cd69,Cdkn2a,Cdkn2b,Clec2d,Cnn2,E2f2,Egln3,Ets1,Fli1,Flt1,Flt3,Gimap5,H2-D1,Hbb-b1,Id3,Ier3,Ikzf1,Il4ra,Irf2,Itgb3,Itpkb,Klf2,Klra17,Lgals9,Lta,Ltb,Lyn,Mafk,Mdm4,Nfkbia,Nos2,Notch1,Pla2g4a,Plcg2,Prex1,Rgs1,Runx3,Socs1,Sqstm1,Stat1,Tec,Tlr7,Tlr8,Tnf,Tom1l2,Txnip,Ubash3a,Zc3h12a	Add2,B2m,B4galt1,Bcl10,Bcl11a,Bik,Birc2,Birc3,Cbfa2t3,Cd47,Cd59a,Cd59b,Cerk,Cx3cl1,Dnase2a,Dusp1,Egr1,Eif2c2,Epb4.2,Fbxo30,Fech,Foxo3,Gadd45a,Gata1,Gnai2,Hba-a2,Hba-x,Hbb-b1,Hk1,Hr,Hyal2,Icam1,Ier3,Ifnar1,Ikzf1,Il10rb,Il2rb,Il4ra,Itga4,Jak1,Klf13,Lat2,Mafk,Mapk14,Mxd1,Myc,Nkx3-1,Nprl3,Pim1,Pim2,Pklr,Plac8,Plau,Pnp,Ppm1d,Ppp2r3c,Prkaa1,Prkcd,Rhoh,Runx3,Rxra,S1pr2,Sipa1,Slc20a1,Slc40a1,Slc4a1,Spna1…	NA	Abcg1,Ace,Ada,Add1,Add2,Akt1,Apoa1,Apoa4,Apoc3,Apoe,Aqp1,Ar,Arhgdib,Arid4a,Arid4b,Arntl,Atm,Axl,B2m,B4galt1,B9d2,BC096441,Bak1,Bax,Bcl10,Bcl2l11,Bik,Birc2,Birc3,Birc5,Casp3,Cbfa2t3,Cbl,Ccr2,Ccr3,Ccr5,Ccr7,Cd19,Cd247,Cd274,Cd40lg,Cd44,Cd47,Cd59a,Cd59b,Cd72,Cd9,Cd97,Cdkn1b,Cds2,Cebpe,Cerk,Cflar,Chd2,Chd4,Clic1,Cpa3,Csf1,Ctcf,Ctse,Ctsg,Ctsl,Ctss,Cx3cl1,Cxcl5,Def6,Diap1,Dicer1,Dll4,Dok1,Dok3,Drosha,E…	NA
Mouse Phenotype	increased IgG level	0		0								0		Apoe,B2m,BC096441,Bak1,Bax,Birc3,Ccl2,Ccr2,Ccr4,Ccr5,Ccr7,Cd19,Cd22,Cd28,Cd69,Cd80,Cd81,Cebpb,Def6,Dusp4,Fasl,Fcer1g,Fcgr1,Fcgr2b,Fcrla,Fcrlb,Gabpb2,Gadd45b,Gnai2,Gpr132,Hrh1,Ifnar1,Ifngr1,Il10ra,Il17f,Il2ra,Il4ra,Il6,Il6st,Inpp5d,Kit,Klf2,Lat,Lgals3,Lyn,Man2a1,Mt1,Mt2,Myd88,Nfe2l2,Nfkbia,Nfkbie,Nlrp6,Nos2,Pdcd1,Pdcd1lg2,Pigr,Ppia,Prkcd,Pten,Ptpn6,Pycard,Rassf5,Rxra,Samsn1,Selp,Sema4b,Sh2b2,Spna1…	NA	B2m,BC096441,Bank1,Birc3,C3,Ccr2,Ccr5,Ccr7,Cd19,Cd80,Cd81,Cebpb,Csf2rb,Csf2rb2,Ctla4,Fasl,Fcgr2b,Fcrla,Fcrlb,Foxp3,Fyn,Gadd45a,Hrh1,Icos,Ifnar1,Il2rb,Il4,Il4ra,Inpp5d,Itgb2,Itgb3,Kit,Klf2,Lat,Lcp2,Nfkb1,Nlrp6,Nos2,Otc,Pdcd1lg2,Pik3c2a,Pstpip2,Ptpn6,Rag1,Retnla,Rxra,Samsn1,Sema4b,Sh2b2,Siae,Stim1,Stim2,Tlr7,Tlr8	NA	NA	NA	NA	NA	NA	NA	Adcy9,Apoe,B2m,BC096441,Bak1,Bax,Bcl2l11,Birc3,Cabin1,Ccr2,Ccr5,Ccr7,Cd19,Cebpb,Csf2rb,Csf2rb2,Def6,Fasl,Fcgr1,Fcgr2b,Fcrla,Fcrlb,Gadd45a,Gadd45b,Gnai2,Hr,Hrh1,Ifnar1,Ikzf3,Il10ra,Il2rb,Il4,Il4ra,Il6,Inpp5d,Itgb2,Itgb3,Klf2,Lat,Lcp2,Mt1,Mt2,Myd88,Nfe2l2,Nfkb1,Nkx3-1,Nos2,Pdcd1lg2,Prkcd,Pstpip2,Ptpn6,Rxra,Samsn1,Sema4b,Sh2b2,Spna1,Stat6,Tnfrsf21,Zc3h12a	NA
Mouse Phenotype	increased IgM level	0												Apoe,B2m,Bak1,Bax,Birc3,Cd19,Cd22,Cd69,Cd72,Cd79a,Cd80,Cd81,Fasl,Fcer2a,Fcgr2b,Flt3l,Gabpb2,Gadd45b,Ggta1,Gnai2,Grb2,H2-Ab1,Hrh1,Ifnar1,Il5ra,Il6st,Inpp5d,Kit,Klra10,Lat,Lta,Ltb,Lyn,Man2a1,Mt1,Mt2,Myd88,Nfe2l2,Nfkbie,Nhej1,Pdcd1lg2,Plcl2,Pou2af1,Prkcd,Pten,Ptgs2,Ptpn6,Relb,Rxra,Samsn1,Sfpi1,Sharpin,Tank,Tgfbr2,Tlr7,Tlr8,Tnf,Zc3h12a	NA	NA	NA	NA	NA	NA	NA	NA	NA	NA	NA
Mouse Phenotype	increased immunoglobulin level	0		0					5.72058e-115			0		Apoe,B2m,BC096441,Bak1,Bax,Birc3,Ccl2,Ccr2,Ccr4,Ccr5,Ccr7,Cd19,Cd22,Cd28,Cd69,Cd72,Cd79a,Cd80,Cd81,Cebpb,Cxcr2,Def6,Dusp4,Fasl,Fcer1g,Fcer2a,Fcgr1,Fcgr2b,Fcrla,Fcrlb,Flt3l,Foxn1,Gabpb2,Gadd45b,Ggta1,Gnai2,Gpr132,Grb2,H2-Ab1,Hexb,Hrh1,Ifnar1,Ifngr1,Il10ra,Il17f,Il21r,Il2ra,Il4ra,Il5ra,Il6,Il6st,Inpp5d,Irf8,Kit,Klf2,Klra10,Lat,Lgals3,Lta,Ltb,Lyn,Man2a1,Mmp9,Mt1,Mt2,Myd88,Nfe2l2,Nfkbia,Nfkbie,Nhej1,…	NA	B2m,BC096441,Bank1,Bbs4,Birc3,C3,Ccr2,Ccr5,Ccr7,Cd19,Cd80,Cd81,Cebpb,Csf2rb,Csf2rb2,Ctla4,Fasl,Fcgr2b,Fcrla,Fcrlb,Fkbp11,Foxp3,Fyn,Gadd45a,Ggta1,Grb2,Hrh1,Icos,Ifnar1,Il21r,Il2rb,Il4,Il4ra,Inpp5d,Itgb2,Itgb3,Kit,Klf2,Klra10,Lat,Lcp2,Msr1,Nedd4,Nfkb1,Nhej1,Nlrp6,Nos2,Otc,Pdcd1lg2,Pik3c2a,Psen2,Pstpip2,Ptpn6,Rag1,Retnla,Rgs1,Rhog,Runx3,Rxra,Samsn1,Sema4b,Sfpi1,Sh2b2,Siae,Siglecg,Stim1,Stim2,Tbx21,T…	NA	NA	NA	NA	Adcy9,Bach2,Cd69,Cebpb,Dusp4,Ggta1,Il21r,Il4ra,Itgb3,Klf2,Klra10,Lta,Ltb,Lyn,Nfkbia,Nos2,Rgs1,Runx3,Sema4b,Stat1,Tlr7,Tlr8,Tnf,Zc3h12a	NA	NA	Adcy9,Apoe,B2m,BC096441,Bak1,Bax,Bcl2l11,Birc3,Cabin1,Ccr2,Ccr5,Ccr7,Cd19,Cd72,Cebpb,Csf2rb,Csf2rb2,Ctse,Def6,Fasl,Fcgr1,Fcgr2b,Fcrla,Fcrlb,Flt3l,Foxn1,Gadd45a,Gadd45b,Ggta1,Gnai2,Grb2,H2-Ab1,Hr,Hrh1,Ifnar1,Ikzf3,Il10ra,Il21r,Il2rb,Il4,Il4ra,Il6,Inpp5d,Irf8,Itgb2,Itgb3,Itk,Klf2,Lat,Lcp2,Mt1,Mt2,Myd88,Nedd4,Nfe2l2,Nfkb1,Nhej1,Nkx3-1,Nos2,Pdcd1lg2,Prkcd,Psen1,Psen2,Pstpip2,Ptpn6,Rabgef1,Relb,Rgs1,R…	NA
Mouse Phenotype	increased inflammatory response	0							3.16052e-207			0		Abcb4,Acan,Ace,Ada,Adam17,Agt,Agtr1b,Als2,Ank,Apc,Apoa4,Apoe,Aprt,Arhgdia,Arl3,Arsa,Atf3,Atp7a,Axl,B2m,B9d2,BC096441,Bag4,Bak1,Bax,Bin3,Bsg,C4b,Cbs,Ccbp2,Ccl2,Ccl25,Ccl3,Ccm2,Ccnd1,Ccr1,Ccr2,Ccr5,Ccr7,Cd19,Cd28,Cd38,Cd44,Cd69,Cd80,Cdsn,Cebpa,Cebpb,Cebpe,Cfb,Chd2,Clec5a,Col2a1,Comp,Cpb2,Cr1l,Cry2,Csf1,Ctnnb1,Cx3cr1,Cxcr2,Cxcr3,Cxcr4,Cxcr7,Cysltr1,Darc,Diap1,Dnase1,Dtx1,Dusp2,E2f2,E2f3,Ebi3,Egr1,Ep…	NA	NA	NA	NA	NA	NA	Agt,Alox5ap,Ccl3,Cd276,Cd69,Cdsn,Cebpb,Cpb2,Dusp2,E2f2,Epha1,F2r,Fads2,Gimap5,Golm1,H2-D1,Id3,Ikzf1,Il12a,Il4ra,Irf2,Itgb3,Ksr1,Lgals9,Lta,Ltb,Ltc4s,Lyn,Mbtps1,Ncf1,Nfkbia,Nos2,Notch1,Pdx1,Pla2g4a,Plcg2,Psap,Runx3,Smtn,Socs1,Stat1,Stat4,Tlr7,Tlr8,Tnf,Tom1l2	NA	NA	Abca1,Abcb4,Abcc4,Abcg1,Ace,Ada,Adamts5,Adm,Agtr1b,Ahi1,Als2,Ank,Apoa4,Apoe,Aprt,Aqp3,Ar,Arntl,Arsa,Atf3,Atp7a,Axl,B2m,B9d2,BC096441,Bak1,Bax,Bcl2l11,Bmpr1a,Bmx,Bsg,C1galt1,Cacna2d2,Casp1,Cbl,Cbs,Cby1,Ccr1,Ccr2,Ccr5,Ccr7,Cd19,Cd276,Cd40lg,Cd44,Cebpb,Cebpe,Chd2,Chrna3,Chrnb4,Col4a3,Comp,Cpb2,Cry2,Csf1,Csf2rb,Ctse,Ctsl,Ctss,Cx3cr1,Cyba,Darc,Diap1,Dicer1,Dkc1,Drosha,Dtx1,E2f2,E2f4,Ebi3,Egr1,Eif2ak3,…	NA
Mouse Phenotype	increased leukocyte cell number	0		0					1.89191e-209			0		Ace,Ada,Adam10,Adam17,Adipoq,Akt1,Akt3,Apc,Apoa1,Apoa4,Apoc3,Apoe,Arhgdia,Arhgdib,Arhgef1,Atp7b,Axl,B2m,B4galt1,B9d2,BC096441,Bak1,Bax,Bcl10,Bcl11a,Bcl3,Bik,Birc2,Birc3,Birc5,Brca2,Bst1,C4b,Casp3,Ccl2,Ccr2,Ccr3,Ccr4,Ccr5,Ccr7,Cd19,Cd22,Cd247,Cd28,Cd3e,Cd44,Cd48,Cd69,Cd72,Cd74,Cd79a,Cd81,Cd97,Cdkn1b,Cdkn2a,Cdkn2b,Cebpe,Cerk,Cflar,Chd2,Chuk,Clec2d,Col10a1,Cpa3,Cr1l,Csf1,Csf1r,Ctcf,Ctnnb1,Cxcl5,Cxcr…	NA	Ace,Ada,Adam10,Arid4b,Arntl,Asxl1,Axl,B2m,B4galt1,B9d2,BC096441,Bank1,Bcl10,Bcl11a,Bik,Birc2,Birc3,Blk,Bst1,C4b,Casp3,Cbl,Ccr2,Ccr3,Ccr5,Ccr7,Cd19,Cd247,Cd274,Cd40lg,Cd44,Cd81,Cd97,Cdkn1b,Cerk,Col10a1,Cpa3,Cr1l,Ctcf,Ctla4,Ctnnb1,Ctsg,Dck,Dffb,Diap1,Dll4,Drosha,Dusp1,E2f1,E2f2,Egr1,Esr2,Ewsr1,Fasl,Fbn1,Fbxo30,Fcgr2b,Fcgr3,Fgg,Flna,Flt3,Foxo3,Foxp3,Fyn,Gadd45a,Galr2,Gata1,Gata3,Gcnt4,Grap2,Grb2,H2-…	NA	NA	NA	NA	Akt1,Bcl11a,Cd48,Cd69,Cdkn2a,Cdkn2b,Clec2d,Cnn2,E2f2,Ets1,Fli1,Flt3,Gimap5,H2-D1,Id3,Ier3,Ikzf1,Il4ra,Irf2,Itgb3,Itpkb,Klf2,Klra17,Lgals9,Lta,Ltb,Lyn,Mdm4,Nfkbia,Nos2,Notch1,Plcg2,Prex1,Rgs1,Runx3,Socs1,Sqstm1,Stat1,Tec,Tlr7,Tlr8,Tnf,Tom1l2,Txnip,Ubash3a,Zc3h12a	NA	NA	Abcg1,Ace,Ada,Akt1,Apoa1,Apoa4,Apoc3,Apoe,Ar,Arhgdib,Arid4a,Arid4b,Arntl,Atm,Axl,B2m,B4galt1,B9d2,BC096441,Bak1,Bax,Bcl10,Bcl2l11,Bik,Birc2,Birc3,Birc5,Casp3,Cbl,Ccr2,Ccr3,Ccr5,Ccr7,Cd19,Cd247,Cd274,Cd40lg,Cd44,Cd72,Cd9,Cd97,Cdkn1b,Cds2,Cebpe,Cerk,Cflar,Chd2,Chd4,Cpa3,Csf1,Ctcf,Ctse,Ctsg,Ctsl,Ctss,Cx3cl1,Cxcl5,Def6,Diap1,Dicer1,Dll4,Dok1,Dok3,Drosha,E2f2,E2f4,Egr1,Elf1,Esr2,Ets1,Ewsr1,Fadd,Farp2,…	NA
Mouse Phenotype	increased lymphocyte cell number	0		0					5.58131e-155			0		Ace,Ada,Adam10,Akt1,Akt3,Apc,Apoe,Arhgdia,Arhgdib,Arhgef1,Axl,B2m,B4galt1,B9d2,BC096441,Bak1,Bax,Bcl10,Bcl11a,Bik,Birc2,Birc3,Birc5,Brca2,Bst1,Casp3,Ccl2,Ccr2,Ccr4,Ccr5,Ccr7,Cd19,Cd22,Cd247,Cd28,Cd3e,Cd48,Cd69,Cd72,Cd74,Cd79a,Cdkn1b,Cdkn2a,Cdkn2b,Cebpe,Cflar,Chd2,Chuk,Col10a1,Cpa3,Cr1l,Ctcf,Cxcr2,Dck,Def6,Dffb,Diap1,Dll1,E2f2,Egr1,Elavl1,Elf1,Ets1,Ewsr1,Fadd,Fasl,Fbxo30,Fcer1g,Fgfr2,Fli1,Fos,Foxn…	NA	Ace,Ada,Adam10,Arid4b,Asxl1,Axl,B2m,B4galt1,B9d2,BC096441,Bank1,Bcl10,Bcl11a,Bik,Birc2,Birc3,Blk,Bst1,Casp3,Cbl,Ccr2,Ccr5,Ccr7,Cd19,Cd247,Cd274,Cd40lg,Cdkn1b,Col10a1,Cpa3,Cr1l,Ctcf,Ctla4,Dck,Dffb,Diap1,Dll4,Drosha,E2f1,E2f2,Egr1,Esr2,Ewsr1,Fasl,Fbxo30,Foxo3,Foxp3,Fyn,Gadd45a,Galr2,Gata3,Grap2,Grb2,H2-K1,Icam1,Icos,Id3,Ikzf1,Il2rb,Il4,Inpp5d,Irf1,Irf2,Itgav,Itgb2,Itpkb,Jak1,Kit,Klf13,Klf2,Lat,Lat2…	NA	NA	NA	NA	Akt1,Bcl11a,Cd48,Cd69,Cdkn2a,Cdkn2b,E2f2,Ets1,Fli1,H2-D1,Id3,Ikzf1,Irf2,Itpkb,Klf2,Lgals9,Lta,Ltb,Lyn,Nfkbia,Nos2,Notch1,Plcg2,Rgs1,Runx3,Socs1,Stat1,Tec,Tlr7,Tlr8,Tnf,Tom1l2,Txnip,Ubash3a,Zc3h12a	NA	NA	Abcg1,Ace,Ada,Akt1,Apoe,Ar,Arhgdib,Arid4a,Arid4b,Atm,Axl,B2m,B4galt1,B9d2,BC096441,Bak1,Bax,Bcl10,Bcl2l11,Bik,Birc2,Birc3,Birc5,Casp3,Cbl,Ccr2,Ccr5,Ccr7,Cd19,Cd247,Cd274,Cd40lg,Cd72,Cdkn1b,Cds2,Cebpe,Cflar,Chd2,Chd4,Cpa3,Ctcf,Ctse,Ctsl,Ctss,Def6,Diap1,Dicer1,Dll4,Drosha,E2f2,E2f4,Egr1,Elf1,Esr2,Ets1,Ewsr1,Fadd,Fasl,Fli1,Foxn1,Foxo3,Gadd45a,Gadd45b,Galr2,Gna13,Gnai2,Grap,Grap2,Grb2,H2-Aa,H2-Ab1,Id…	NA
Mouse Phenotype	increased neutrophil cell number	0										0		Adam17,B4galt1,C4b,Casp3,Ccl2,Ccr4,Cflar,Csf1,Cxcr2,Diap1,Dok2,Fasl,Fcgr3,Flt3,Flt3l,Foxn1,Fut4,Fut7,Gcnt4,Gimap5,Gnai2,Icam1,Ier3,Il6st,Inpp5d,Irf8,Itgam,Lepr,Lyn,Mll1,Mll5,Mt1,Mt2,Nr4a1,Pggt1b,Plac8,Pomt1,Prex1,Ptch1,Pten,Ptpn6,Rac2,Runx1,Sele,Sell,Selp,Selplg,Sfpi1,Slc35c1,Smad3,Sos1,Spna1,Tec,Timp2,Tnf,Vdr,Zfp36,Zfpm1	NA	NA	NA	NA	NA	NA	NA	NA	NA	Abcg1,Arid4a,Arid4b,Arntl,B4galt1,Casp3,Cflar,Csf1,Ctss,Diap1,Dok1,Esr2,Fasl,Fcgr3,Flt3,Flt3l,Foxn1,Fut7,Gata1,Gcnt4,Gnai2,Id1,Ier3,Il2rb,Inpp5d,Irak3,Irf8,Itgb2,Lepr,Ly6a,Mt1,Mt2,Plac8,Ptch2,Ptpn6,Rac2,Rbp1,Runx1,Selplg,Sfpi1,Slc35c1,Slfn2,Smad3,Spna1,Stat3,Tbx21,Tec,Timp3,Unc13d,Was,Zfp36,Zfpm1	NA
Mouse Phenotype	increased organ/body region tumor incidence	0										0		1190003J15Rik,2700078K21Rik,Abcb4,Adipoq,Aes,Akt1,Akt3,Amh,Amhr2,Apc,Asph,Atp2a2,Aurkb,B2m,Bard1,Bax,Becn1,Bin3,Braf,Brca2,Casc1,Ccnd1,Cd19,Cd34,Cd44,Cdk11b,Cdk4,Cdkn1b,Cdkn2a,Cdkn2b,Cdsn,Cdx2,Cebpa,Chd2,Chek1,Chuk,Cks1b,Ctnnb1,Cul9,Cxcr6,Dmtf1,Dnd1,Dok2,Eef1a1,Egr1,Errfi1,Ets2,Ewsr1,F2r,F3,Fasl,Fbxo30,Fgfr2,Flcn,Fli1,Fos,Foxm1,Foxo1,Fshr,Gast,Gli1,Gnai2,Gnmt,Grb2,H2afx,Hif1a,Hmga1,Hspa5,Ifngr1,I…	NA	NA	NA	NA	NA	NA	NA	NA	NA	2700078K21Rik,Abcb4,Aes,Aip,Akt1,Ar,Arid4a,Arid4b,Asph,Atm,Aurkb,B2m,Bax,Becn1,Blm,Cd19,Cd44,Cdkn1b,Cdx2,Chd2,Chek2,Cks1b,Ctsg,Cxcr6,Dicer1,Dkc1,Dnd1,Dok1,Dok3,E2f4,Egr1,Erbb2,Esr2,Ets2,Ewsr1,F2r,Fasl,Fgf2,Fli1,Fntb,Foxo3,Fzr1,Gadd45a,Gast,Gli1,Gnai2,Gnmt,Gprc5a,Grb2,Gstp1,Gstp2,H2afx,Hic1,Hmga1,Hp,Hr,Hspa5,Htatip2,Id1,Igf1r,Ikzf1,Ikzf3,Il12rb2,Inpp5d,Iqgap1,Irf8,Kat5,Lass2,Lzts1,Mad1l1,Map3k1,Ma…	NA
Mouse Phenotype	increased physiological sensitivity to xenobiotic	0												Abcc1,Adh5,Adrbk1,Akt3,Als2,Apc,Atf6,Brca2,Casc1,Ccr2,Cdkn1b,Cdkn2a,Cdkn2b,Cebpa,Cebpb,Cox15,Cpa3,Cpb2,Cul9,Cx3cr1,Egr1,Ercc1,Errfi1,Fgfr2,Flcn,Foxm1,Gal,Gast,Gnai2,Gsta3,Hint1,Hyou1,Ifnar1,Il6st,Irf1,Ivns1abp,Kit,Mbd3,Mpo,Msh2,Mt1,Mt2,Mtf1,Myd88,Myl2,Nacc1,Ncoa3,Nfe2l2,Nit1,Nkx2-5,Nlrp6,Nr1i3,Nr4a2,Park7,Pdc,Pdgfrb,Pgp,Pms2,Pomc,Ppard,Ppp2r1a,Prf1,Psen1,Pten,Ptger1,Ptgs1,Ptgs2,Ranbp2,Rhob,Sdc4,S…	NA	NA	NA	NA	NA	NA	NA	NA	NA	NA	NA
Mouse Phenotype	increased single-positive T cell number	0		0								0		Apoe,Arhgdia,Arhgdib,B2m,B9d2,BC096441,Bcl11a,Ccl2,Ccr2,Ccr4,Ccr7,Cd19,Cd28,Cd48,Cd74,Cd79a,Cdkn2a,Cflar,Chd2,Col10a1,Cpa3,Ctcf,Diap1,Dll1,E2f2,Elavl1,Foxo1,Gna13,Gnai2,Grap,Grb2,H2-Aa,H2-Ab1,H2-D1,H2-K1,Il2ra,Il6st,Il9r,Irf1,Itgam,Klf2,Lat,Lgals9,Mmp9,Mt1,Mt2,Myb,Ncoa3,Nfkbia,Nos2,Notch1,Pdcd1lg2,Plcg1,Ppm1d,Ptch1,Pten,Runx1,Runx3,S1pr1,Sgpl1,Siglec1,Socs1,Spna1,Stat1,Stk17b,Stk4,Tap1,Tcf12,Tcf3…	NA	B2m,B9d2,BC096441,Bcl11a,Cbl,Ccr2,Ccr7,Cd19,Cd274,Cd40lg,Col10a1,Cpa3,Ctcf,Ctla4,Diap1,Drosha,E2f1,E2f2,Foxp3,Gata3,Grb2,H2-K1,Il2rb,Irf1,Klf2,Lat,Lcp2,Lgals9,Myb,Ncoa3,Nedd4,Nos2,Notch1,Otc,Pdcd1lg2,Pik3c2a,Ppm1d,Rag1,Runx1,Runx3,S1pr1,Stat3,Stim1,Stim2,Stk4,Tbpl1,Tbx21,Tgfb1,Tom1l2	NA	NA	NA	NA	NA	NA	NA	Abcg1,Apoe,Arhgdib,Atm,B2m,B9d2,BC096441,Bcl2l11,Cbl,Ccr2,Ccr7,Cd19,Cd274,Cd40lg,Cflar,Chd2,Chd4,Cpa3,Ctcf,Ctsl,Diap1,Drosha,E2f2,Gna13,Gnai2,Grap,Grb2,H2-Aa,H2-Ab1,Il2rb,Il9r,Itk,Klf2,Lat,Lcp2,Lgals9,Mt1,Mt2,Myb,Ncoa3,Nedd4,Nos2,Notch1,Pdcd1lg2,Plcg1,Prnp,Runx1,Runx3,S1pr1,Socs1,Spna1,Stat3,Tap1,Tbpl1,Tbx21,Tcf3,Tgfb1,Tnfrsf21,Tom1l2,Twsg1,Unc13d,Was	NA
Mouse Phenotype	increased susceptibility to autoimmune disorder	0		0								0		Apoe,B2m,Bak1,Bax,Ccr7,Cd19,Cd28,Cd300lf,Cd38,Cd44,Cd74,Cd79a,Cd80,Cdk4,Cry2,Cx3cr1,Dnase1,E2f2,Ecm1,Elf1,Fasl,Fcgr2b,Gadd45b,Gna13,H2-Ab1,H2-T23,Hc,Hcst,Ifnar1,Ifngr1,Il21r,Il6st,Il9r,Ins1,Irs1,Lat,Lepr,Lgals1,Lgals9,Lyn,Map4k1,Mmp2,Mog,Mpo,Mr1,Mt1,Mt2,Mta2,Nfe2l2,Nos2,Nr3c1,Pdcd1,Pdcd1lg2,Pecam1,Polr2a,Psen1,Ptpn6,Ptprn,Selp,Sit1,Stat4,Stat6,Tusc2,Ubash3a,Vdr,Zap70	NA	B2m,Ccr7,Cd19,Cd274,Cd276,Cd300lf,Cd38,Cd40lg,Cd44,Cd55,Cd80,Cry2,Ctla4,Dnase1,Dusp1,E2f1,E2f2,Ecm1,Fasl,Fcgr2b,Foxp3,Fyn,Hc,Icos,Ifnar1,Il21r,Il2rb,Il4,Lat,Lepr,Lgals1,Lgals9,Mbp,Mpo,Ngfr,Nos2,Nr3c1,Pdcd1lg2,Polr2a,Prkci,Psen2,Ptpn6,Ptprn,Rag1,Stim1,Stim2	NA	NA	NA	NA	NA	NA	NA	Apoe,B2m,Bak1,Bax,Bcl2l11,Ccr7,Cd19,Cd274,Cd276,Cd40lg,Cd44,Cd55,Cry2,Csf3,Cx3cr1,E2f2,Ecm1,Elf1,Fasl,Fcgr2b,Gadd45b,Gna13,H2-Ab1,H2-T23,Hc,Hr,Ifnar1,Il21r,Il27,Il2rb,Il4,Il9r,Lat,Lepr,Lgals1,Lgals9,Map4k1,Mbp,Mpo,Mt1,Mt2,Mta2,Nfe2l2,Ngfr,Nkx3-1,Nos2,Nr3c1,Pdcd1lg2,Polr2a,Prkci,Psen1,Psen2,Ptpn6,Ptprn,Sit1,Stat6,Tnfrsf1a,Tusc2,Ubash3a	NA
Mouse Phenotype	increased susceptibility to infection	0		0					2.9599e-125			0		Adamts13,Adh5,Adprh,Aim2,Apoe,B2m,BC096441,Bcl10,Bcl3,C4b,Card9,Ccl2,Ccr1,Ccr2,Ccr5,Cd19,Cd207,Cd24a,Cd28,Cd44,Cd5l,Cd74,Cebpb,Cebpe,Cerk,Cfb,Clec4e,Clec4n,Clec7a,Clic4,Ctnnb1,Cx3cr1,Cxcl15,Cxcr2,Dapp1,Defb1,Defb3,Dusp4,Ebi3,Fadd,Fasl,Fcer1g,Fcgr1,Fgr,Flt3,Fos,G6pc3,Git2,Gnai2,H2-Ab1,H2-T23,Hc,Ier3,Ifnar1,Ifngr1,Ikbke,Ikzf1,Il10ra,Il12rb2,Il17f,Il17ra,Il4ra,Il5ra,Il6,Il6st,Irf1,Irf8,Irgm1,Itgam,I…	NA	Adprh,Apcs,Apobec3,B2m,BC096441,Bcl10,C3,C4b,Card9,Ccr1,Ccr2,Ccr5,Cd19,Cd24a,Cd40lg,Cd44,Cd47,Cebpb,Cerk,Cfb,Clec4e,Clec4n,Clic4,Csf2rb,Ctnnb1,Ctsg,Cybb,Dapp1,Defb1,Defb3,Dusp1,Ebi3,Fasl,Fgg,Fgr,Flt3,Gata3,Git2,Gpc3,Gzmb,Hc,Ier3,Ifih1,Ifnar1,Ifnar2,Ifngr2,Iigp1,Ikzf1,Il1b,Il2rg,Il4,Il4ra,Irf1,Irf9,Irgm1,Itgb2,Itpkb,Kit,Klra10,Klra17,Lepr,Map3k14,Mbtps1,Mcpt1,Mcpt8,Mll5,Mmp10,Mmp3,Mmp8,Mpo,Msr1,Nc…	NA	NA	NA	NA	Cebpb,Clec7a,Clic4,Dusp4,Flt3,Hps5,Ier3,Ikzf1,Il12a,Il4ra,Itpkb,Klra10,Klra17,Lta,Ltb,Mbtps1,Ncf1,Nfkbia,Nos2,Pik3r1,Plcg2,Slamf1,Slamf6,Stat1,Stat4,Tnf,Tom1l2,Vsig4	NA	NA	Aim2,Apoe,B2m,BC096441,Bcl10,C5ar1,Casp1,Cby1,Ccr1,Ccr2,Ccr5,Cd19,Cd24a,Cd40lg,Cd44,Cd47,Cebpb,Cebpe,Cerk,Chrna3,Chrnb4,Clec4e,Clec4n,Clic4,Csf2rb,Csf3,Csk,Ctsg,Cx3cr1,Cxcl15,Cyba,Dapp1,Defb1,Defb3,Dicer1,E2f4,Ebi3,F2,Fadd,Fasl,Fcgr1,Fgr,Flt3,Git2,Gnai2,Gpc3,Gzmb,H2-Ab1,H2-T23,Hc,Hps5,Ier3,Ifih1,Ifnar1,Ifnar2,Ifngr2,Igtp,Ikzf1,Il10ra,Il12rb2,Il17ra,Il1b,Il4,Il4ra,Il6,Ilf3,Irf8,Irf9,Irgm1,Itgb2,It…	NA
Mouse Phenotype	increased susceptibility to parasitic infection	0							8.81994e-50					Apoe,Bcl3,Ccl2,Ccr1,Cd24a,Cd28,Cd44,Cd74,Ctnnb1,Cxcr2,Dusp4,Ebi3,Fadd,Fcer1g,Gnai2,H2-Ab1,Ier3,Ifngr1,Il10ra,Il4ra,Il5ra,Il6,Il6st,Irgm1,Itgb7,Itpkb,Kit,Klra10,Lepr,Lgals3,Lta,Ltb,Nfatc2ip,Nos2,Notch2,Pdcd1lg2,Pigr,Plau,Pou2af1,Prf1,Ptafr,Slamf1,Stat6,Tnf,Tpsb2	NA	NA	NA	NA	NA	NA	Dusp4,Ier3,Il12a,Il4ra,Itpkb,Klra10,Lta,Ltb,Nos2,Slamf1,Tnf	NA	NA	NA	NA
Mouse Phenotype	increased T cell number	0		0								0		Ace,Ada,Akt1,Akt3,Apc,Apoe,Arhgdia,Arhgdib,B2m,B9d2,BC096441,Bax,Bcl10,Bcl11a,Bik,Birc3,Birc5,Brca2,Ccl2,Ccr2,Ccr4,Ccr5,Ccr7,Cd19,Cd247,Cd28,Cd3e,Cd48,Cd74,Cd79a,Cdkn1b,Cdkn2a,Cflar,Chd2,Col10a1,Cpa3,Ctcf,Dck,Def6,Dffb,Diap1,Dll1,E2f2,Elavl1,Ets1,Fadd,Fasl,Fbxo30,Fcer1g,Fgfr2,Fos,Foxn1,Foxo1,Gadd45b,Galr2,Gna13,Gnai2,Grap,Grap2,Grb2,H2-Aa,H2-Ab1,H2-D1,H2-K1,Id3,Il2ra,Il6,Il6st,Il9r,Irf1,Irf2,Itga…	NA	Ace,Ada,Arid4b,Asxl1,B2m,B9d2,BC096441,Bcl10,Bcl11a,Bik,Birc3,Blk,Cbl,Ccr2,Ccr5,Ccr7,Cd19,Cd247,Cd274,Cd40lg,Cdkn1b,Col10a1,Cpa3,Ctcf,Ctla4,Dck,Dffb,Diap1,Drosha,E2f1,E2f2,Esr2,Fasl,Fbxo30,Foxp3,Fyn,Gadd45a,Galr2,Gata3,Grap2,Grb2,H2-K1,Id3,Il2rb,Irf1,Irf2,Itgav,Itgb2,Itpkb,Jak1,Klf13,Klf2,Lat,Lat2,Lcp2,Lgals9,Map3k3,Mapk14,Mcl1,Me2,Myb,Ncoa3,Nedd4,Nfatc3,Nos2,Notch1,Otc,Pdcd1lg2,Pik3c2a,Ppm1d,Ppp…	NA	NA	NA	NA	NA	NA	NA	Abcg1,Ace,Ada,Akt1,Apoe,Arhgdib,Arid4a,Arid4b,Atm,B2m,B9d2,BC096441,Bax,Bcl10,Bcl2l11,Bik,Birc3,Birc5,Cbl,Ccr2,Ccr5,Ccr7,Cd19,Cd247,Cd274,Cd40lg,Cdkn1b,Cds2,Cflar,Chd2,Chd4,Cpa3,Ctcf,Ctse,Ctsl,Def6,Diap1,Dicer1,Drosha,E2f2,E2f4,Esr2,Ets1,Fadd,Fasl,Foxn1,Gadd45a,Gadd45b,Galr2,Gna13,Gnai2,Grap,Grap2,Grb2,H2-Aa,H2-Ab1,Id3,Il2rb,Il6,Il7r,Il9r,Irf2,Itgb2,Itk,Jak1,Klf13,Klf2,Lat,Lcp2,Lgals9,Ltbr,Maml1,…	NA
Mouse Phenotype	increased tumor incidence	0										0		1190003J15Rik,2700078K21Rik,Abcb4,Adipoq,Aes,Akt1,Akt3,Amh,Amhr2,Apc,Asph,Atp2a2,Aurkb,B2m,Bard1,Bax,Becn1,Bin3,Braf,Brca2,Casc1,Ccnd1,Cd19,Cd34,Cd44,Cdk11b,Cdk4,Cdkn1b,Cdkn2a,Cdkn2b,Cdsn,Cdx2,Cebpa,Chd2,Chek1,Chuk,Cks1b,Ctnnb1,Cul9,Cxcr3,Cxcr6,Cytip,Dgkd,Dmtf1,Dnd1,Dok2,Eef1a1,Egr1,Ercc1,Errfi1,Ets2,Ewsr1,F2r,F3,Fasl,Fbxo30,Fgfr2,Flcn,Fli1,Fos,Foxm1,Foxn1,Foxo1,Fshr,Gast,Gli1,Gnai2,Gnmt,Grb2,H2a…	NA	NA	NA	NA	NA	NA	NA	NA	NA	2700078K21Rik,Abcb4,Aes,Aip,Akt1,Amelx,Ar,Arid4a,Arid4b,Asph,Atm,Aurkb,B2m,Bax,Becn1,Blm,Cd19,Cd226,Cd44,Cdkn1b,Cdx2,Chd2,Chek2,Cks1b,Ctsg,Cxcr6,Cygb,Dicer1,Dkc1,Dnd1,Dok1,Dok3,Dph1,E2f4,Egr1,Erbb2,Ercc1,Esr2,Ets2,Ewsr1,F2r,Fasl,Fgf2,Fli1,Fntb,Foxn1,Foxo3,Fzr1,Gadd45a,Gast,Gli1,Gnai2,Gnmt,Gprc5a,Grb2,Gstp1,Gstp2,H2afx,Hic1,Hivep3,Hmga1,Hp,Hr,Hspa5,Htatip2,Id1,Ifnar1,Ifnar2,Igf1r,Ikzf1,Ikzf3,Il12r…	NA
Mouse Phenotype	joint inflammation	0												Acan,Ank,Atp7a,Axl,BC096441,Bak1,Bax,Cd44,Cd69,Cfb,Clec5a,Col2a1,Comp,Cry2,Cxcr2,Cxcr4,Dusp2,Errfi1,Fcgr1,Hc,Hif1a,Hyal1,Ifnar1,Ifngr1,Il17f,Il6st,Irf1,Itgb7,Ksr1,Lgals9,Lta,Mapk14,Matn3,Mmp9,Ndst2,Ndufaf1,Pdcd1,Pecam1,Plau,Ptgs1,Ptgs2,Ptpn6,Selp,Sharpin,Smad3,Tnf,Tpsab1,Tpsb2,Tyro3,Tyrobp,Zap70,Zfp36	NA	NA	NA	NA	NA	NA	NA	NA	NA	NA	NA
Mouse Phenotype	kidney inflammation	0										0		Ace,Agt,Agtr1b,Apoe,Aprt,Arhgdia,Bak1,Bax,C4b,Ccr2,Cd19,Cebpb,Cxcr3,Dnase1,Dtx1,E2f2,Fasl,Fcer1g,Fcgr2b,Gadd45b,Glis2,Gpr132,Hif1a,Ifnar1,Ifngr1,Il12rb2,Il5ra,Irf1,Kit,Lat,Lyn,Man2a1,Mgat2,Mmp9,Mt1,Mt2,Mta2,Nfe2l2,Pdcd1,Pdss2,Pkd1,Prkcd,Psap,Psen1,Pten,Ptgs2,Rassf5,Rc3h1,Relb,Rpl22,Rxra,Selp,Selplg,Sgpl1,Slc26a1,Socs1,Spna1,Tank,Tlr7,Tlr8,Tlr9,Tns1,Top3b,Vhl	NA	NA	NA	NA	NA	NA	NA	NA	NA	Abca1,Ace,Agtr1b,Ahi1,Apoe,Aprt,Bak1,Bax,Bcl2l11,C1galt1,Ccr2,Cd19,Cebpb,Col4a3,Dtx1,E2f2,Fasl,Fcgr2b,Foxo3,Gadd45a,Gadd45b,Golm1,Hr,Ifnar1,Ikzf3,Il12rb2,Il4,Itga1,Lat,Mt1,Mt2,Mta2,Mut,Nfe2l2,Nkx3-1,Pdss2,Plcg2,Prkcd,Psap,Psen1,Psen2,Relb,Rpl22,Rxra,Sat1,Selplg,Slc3a1,Socs1,Spna1,Top3b,Vhl,Wdr83,Wt1	NA
Mouse Phenotype	lethality throughout fetal growth and development	0										0		Adam17,Adipoq,Adrbk1,Apaf1,Apc,Arf6,Bax,Bmpr2,Brca2,Cacna1c,Calcrl,Calr,Carm1,Ccnd1,Ccnd2,Cdk4,Cdkn1b,Chuk,Clec1b,Clp1,Col4a1,Col4a2,Cr1l,Creb1,Crk,Csnk1d,Ctnnb1,Cux2,Cxcr4,Daam1,E2f3,Ednrb,Elavl1,Enah,Erbb3,Ets1,Ets2,Etv5,F11r,F2r,Fbn1,Fbxl20,Fgf15,Fkbp1a,Flna,Foxf1a,Foxm1,Gad2,Gata5,Ggcx,Gli1,Glrx3,Gpr124,Grhl2,Gsk3b,Hdac5,Heg1,Hes3,Hexim1,Hhex,Hs6st1,Ikzf1,Il6st,Inpp5e,Itga3,Itgav,Kit,Klf2,Lam…	NA	NA	NA	NA	NA	NA	NA	NA	NA	Abca1,Aco1,Adam19,Adm,Aip,Arf6,Bax,Bid,Blm,Bmpr1a,Bmpr2,C1galt1,Calcrl,Calr,Cbl,Ccnd2,Cdkn1b,Cited2,Clp1,Csnk1d,Ctbp1,Cux2,Daam1,Dicer1,E2f4,Erbb3,Ets1,Ets2,F2,F2r,Fbxl20,Fgf15,Fkbp1a,Foxf1a,Foxj1,Fuz,Gata1,Gata2,Gfi1b,Ggcx,Gli1,Gpr124,Hand2,Heg1,Hes3,Hexim1,Hhex,Hs6st1,Igf2r,Ikzf1,Intu,Itga3,Itga5,Itga6,Klf2,Lama5,Lgr4,Lrp1,Ltbp1,Ly6e,Mab21l2,Map3k4,Mapk14,Meis1,Men1,Mtf1,Mthfd2,Myb,Myh10,Myl2,N…	NA
Mouse Phenotype	malignant tumors	0										0		1190003J15Rik,2700078K21Rik,Abcb4,Aes,Akt1,Akt3,Amhr2,Apc,Atp2a2,Aurkb,B2m,Bard1,Bax,Becn1,Bin3,Braf,Brca2,Casc1,Ccnd1,Cd19,Cdk4,Cdkn1b,Cdkn2a,Cdkn2b,Cebpa,Chek1,Chuk,Ctnnb1,Cul9,Cxcr6,Cytip,Dgkd,Dmtf1,Dok2,Eef1a1,Errfi1,F2r,F3,Fasl,Flcn,Fos,Foxm1,Foxn1,Foxo1,Fshr,Gli1,Gnai2,Gnmt,Grb2,H2afx,Hspa5,Il12rb2,Inpp5d,Iqgap2,Irf1,Itgav,Lass2,Mad1l1,Map2k7,Mapk14,Mcm4,Men1,Mfge8,Mll1,Mmp9,Msh2,Msmb,Mzf1,…	NA	NA	NA	NA	NA	NA	NA	NA	NA	2700078K21Rik,Abcb4,Aes,Akt1,Ar,Arid4a,Arid4b,Atm,Aurkb,B2m,Bax,Becn1,Blm,Cd19,Cdkn1b,Chek2,Cxcr6,Dicer1,Dkc1,Dok1,Dok3,F2r,Fasl,Fntb,Foxn1,Foxo3,Fzr1,Gadd45a,Gli1,Gnai2,Gnmt,Gprc5a,Grb2,H2afx,Hic1,Hr,Hspa5,Htatip2,Il12rb2,Inpp5d,Iqgap1,Lass2,Ly6a,Lzts1,Mad1l1,Mapk14,Mc1r,Men1,Mmp11,Msmb,Nckap1,Ncoa3,Nhej1,Nkx3-1,Nudt1,Pax7,Plau,Pms2,Pold1,Polh,Polr2a,Ppard,Prdx1,Psmb9,Ptch2,Ptgds,Ranbp2,Rb1,Rbl2…	NA
Mouse Phenotype	mortality/aging	0		0								0		2010111I01Rik,2700078K21Rik,6230427J02Rik,6720456B07Rik,AI848100,Abca2,Abcc1,Abce1,Abi1,Acadl,Acadm,Acan,Acd,Ace,Acly,Actg1,Actn4,Acvr1b,Ada,Adam10,Adam15,Adam17,Adam23,Adam9,Adamts13,Adamts20,Adh5,Adipoq,Adora2b,Adra2b,Adrbk1,Aes,Aff1,Afmid,Agpat2,Agps,Agrp,Agt,Agtr1b,Aimp2,Akap10,Akap8,Akt1,Akt3,Alas1,Aldh1a1,Aldh5a1,Als2,Alx4,Amd2,Amhr2,Amn,Amot,Angptl4,Angptl6,Ank,Ank3,Ankrd11,Anp32e,Antxr1,A…	NA	6720456B07Rik,AI848100,Abca1,Abca3,Abcc1,Abcc4,Abce1,Abhd5,Abi1,Acadm,Acadvl,Acd,Ace,Aco1,Acss1,Actg1,Ada,Adam10,Adam9,Adamts1,Add1,Adra1a,Adrb1,Aff1,Afg3l2,Agpat2,Agrp,Agtr1a,Agtr1b,Aip,Alas2,Als2,Alx3,Alx4,Ambra1,Amhr2,Amn,Amph,Angpt1,Ank,Ankrd11,Anp32a,Anp32b,Antxr1,Ap1m1,Apba1,Apcs,Aph1a,Apobec3,Aprt,Aqp11,Aqp2,Aqp3,Aqp5,Arhgap6,Arid3a,Arid4b,Arntl,Arx,Atf6,Atg5,Atg9a,Atoh8,Atp1b2,Atp2b1,Atp6…	NA	NA	NA	NA	NA	NA	NA	2700049A03Rik,2700078K21Rik,6720456B07Rik,AI848100,Abca1,Abca2,Abcc1,Abcc4,Abcc9,Abhd5,Acaca,Acd,Ace,Aco1,Acss1,Acta1,Actg1,Actl6b,Actn4,Ada,Adam19,Adam9,Add1,Adm,Adrb1,Aes,Aff1,Afg3l2,Afmid,Agpat2,Agrp,Agtr1b,Ahi1,Aimp2,Aip,Akt1,Alas2,Als2,Angpt1,Angptl4,Angptl6,Ank,Ankrd11,Anp32a,Anp32b,Anp32e,Antxr1,Ap1m1,Apoa4,Apoe,Aprt,Aqp1,Aqp11,Aqp3,Ar,Arf6,Arhgap1,Arhgap6,Arhgdib,Arid4a,Arid4b,Arl13b,Arnt…	NA
Mouse Phenotype	premature death	0										0		2700078K21Rik,Acadl,Acan,Acd,Ace,Actg1,Actn4,Adam17,Adamts13,Aes,Akap10,Akt1,Als2,Amhr2,Angptl4,Ank,Ank3,Apaf1,Apc,Apoa4,Apoe,Aprt,Aqp11,Arhgdia,Asph,Atad1,Atcay,Atn1,Atp2a2,Atp7a,Aurkb,B2m,B4galt1,Bak1,Bax,Becn1,Bik,Bmp7,Braf,Brca2,Cacna1a,Cacna1c,Camk2a,Capn5,Cask,Casp3,Cbs,Ccdc88a,Ccl3,Ccm2,Ccr10,Ccr2,Cd19,Cd22,Cd74,Cdkn1b,Cdkn2a,Cdkn2b,Cdsn,Cebpa,Cebpb,Cebpe,Cfc1,Cfl1,Cflar,Chd2,Chrne,Chuk,Ck…	NA	NA	NA	NA	NA	NA	NA	NA	NA	2700078K21Rik,Abca1,Abcc9,Acd,Ace,Acss1,Actg1,Actn4,Adam19,Aes,Ahi1,Akt1,Als2,Angptl4,Ank,Anp32b,Apoa4,Apoe,Aprt,Aqp11,Ar,Arhgap1,Arid4a,Arid4b,Arntl,Arx,Asph,Atm,Atp7a,Aurkb,B2m,B4galt1,Bak1,Bax,Bcl2l11,Becn1,Bik,Bmpr1a,C1galt1,Cacna1a,Cacna2d2,Capn5,Cask,Casp12,Casp3,Cbl,Cbs,Ccna2,Ccne1,Ccr10,Ccr2,Cd19,Cd47,Cdc73,Cdkn1b,Cebpb,Cebpe,Cfl1,Cflar,Chd2,Chek2,Chrna3,Chrne,Cks1b,Clcn3,Clcn7,Cln6,Cntna…	NA
Mouse Phenotype	prenatal lethality	0		0								0		6720456B07Rik,Abce1,Abi1,Acadl,Acly,Acvr1b,Adam10,Adam17,Adipoq,Adra2b,Adrbk1,Agrp,Akt1,Akt3,Alas1,Alx4,Amd2,Amhr2,Amn,Amot,Angptl6,Ankrd11,Ap1m1,Apaf1,Apc,Arf6,Arhgdia,Arhgdib,Arid1a,Arid3a,Arl3,Atf6,Atp2a2,Atp6ap1,Atp6v0c,Atp6v0d1,Atp7a,Atrx,Aurkb,B2m,B4galt5,Bag1,Bard1,Bax,Bbs1,Becn1,Birc5,Bmp7,Bmp8b,Bmpr2,Braf,Brca2,Bsg,Bysl,C2cd3,Cacna1c,Cacng2,Cacng4,Calcrl,Calr,Capn5,Carm1,Casp3,Casp9,Ccdc…	NA	6720456B07Rik,Abca1,Abca3,Abce1,Abi1,Aco1,Adam10,Add1,Adrb1,Agrp,Aip,Alas2,Alx4,Ambra1,Amhr2,Amn,Angpt1,Ankrd11,Ap1m1,Aph1a,Aqp5,Arhgap6,Arid3a,Arid4b,Atf6,Atoh8,Atp2b1,Atp6ap1,Atp6v0d1,Atp7a,Atrx,B2m,Bbs4,Becn1,Bmp5,Bmpr2,C130022K22Rik,C1galt1,C1galt1c1,Cacna1c,Cacng4,Calcrl,Casc5,Casp3,Cbl,Ccnb1,Ccnd2,Cdh2,Cdk11b,Cdk19,Cdk8,Cdkn1b,Cdx2,Cebpb,Celsr1,Cenpc1,Chaf1a,Chd8,Cited1,Cited2,Col5a1,Cops2,…	NA	NA	NA	NA	NA	NA	NA	2700049A03Rik,6720456B07Rik,Abca1,Acaca,Aco1,Adam19,Add1,Adm,Adrb1,Agrp,Aip,Akt1,Alas2,Angpt1,Angptl6,Ankrd11,Ap1m1,Aqp1,Arf6,Arhgap6,Arhgdib,Arid4b,Arl13b,Atf6,Atm,Atoh8,Atp6v0d1,Atp7a,Atrx,Aurkb,B2m,B4galt5,Bax,Bbs1,Bcar1,Bcl2l11,Becn1,Bid,Birc5,Blm,Bmpr1a,Bmpr2,Bsg,Bysl,C1galt1,C1galt1c1,Cabin1,Cacng2,Calcrl,Calr,Capn5,Capns1,Casp3,Casp9,Cbl,Ccna2,Ccnb1,Ccnd2,Ccne1,Cdc7,Cdc73,Cdk8,Cdkn1b,Cdx2,…	NA
Mouse Phenotype	small thymus	0		0								0		Ada,Adam10,Aff1,Akt1,Akt3,Apc,Bag4,Bcl11a,Birc5,Braf,Cacna1a,Carm1,Cd247,Cd3d,Cd3e,Cd3g,Clk1,Col10a1,Cpa3,Crip3,Ctcf,Cxcr2,Dad1,Dck,Dffb,E2f2,Eef1a2,Elavl1,Ets1,Ewsr1,Fadd,Fbln1,Fbxo30,Flt3,Foxn1,Gimap5,Hist1h1c,Hist1h1d,Hist1h1e,Icam1,Ikzf1,Il6st,Inpp5d,Jak1,Kit,Lat,Lmna,Mcl1,Mdc1,Mdm4,Mll5,Msi2,Myb,Nfkbia,Nhej1,Nkx2-5,Notch1,Notch3,Pbx1,Pdgfrb,Pfdn1,Pnp,Ppm1d,Prf1,Ptch1,Ptcra,Ptpn6,Relb,Rhoh,Rp…	NA	Ada,Adam10,Aff1,Bag4,Bcl11a,Cacna2d2,Cbl,Cd247,Col10a1,Cpa3,Crlf2,Ctcf,Ctsd,Dad1,Dck,Dffb,Dll4,E2f2,Esr2,Ewsr1,Fads2,Fbxo30,Fen1,Flt3,Foxp3,Fyn,Gata3,Gfi1,Hist1h1c,Hist1h1d,Hist1h1e,Icam1,Ikzf1,Il2rb,Il2rg,Inpp5d,Jak1,Kit,Lat,Lcp2,Map3k14,Mcl1,Mdc1,Mdm2,Mesp1,Mll5,Msi2,Myb,Nbn,Ncor1,Nfatc3,Nfkb1,Nhej1,Nkx2-5,Notch1,Pcsk5,Pfdn1,Ppm1d,Ppp3r1,Ptcra,Ptpn6,Rag1,Rhoh,Rpl22,Runx1,Sfpi1,Slc19a1,Sox17,Sp3…	NA	NA	NA	NA	NA	NA	NA	Ada,Aff1,Akt1,Arhgap1,Atm,Birc5,Cacna1a,Cacna2d2,Cbl,Cd247,Chd4,Cpa3,Csk,Ctcf,Ctsd,Ctsl,Cyp1a2,Dad1,Dll4,E2f2,E2f4,Esr2,Ets1,Ewsr1,Fadd,Fads2,Fgf8,Flt3,Foxn1,Gfi1,Hist1h1c,Hist1h1d,Hist1h1e,Hr,Htra2,Ikzf1,Il2rb,Il7r,Inpp5d,Jak1,Lat,Lcp2,Mcl1,Mdc1,Mdm4,Msi2,Myb,Ncor1,Nfatc3,Nfkb1,Nhej1,Nkx2-5,Notch1,Notch3,Pbx1,Pfdn1,Prnp,Ptcra,Ptk2,Ptpn6,Relb,Rpl22,Rpl27a,Runx1,Sfpi1,Sit1,Slc19a1,Slc46a2,Smad3,So…	NA
Mouse Phenotype	thymus hypoplasia	0		0										Adam10,Aff1,Akt1,Akt3,Apc,Bag4,Bcl11a,Birc5,Carm1,Cd247,Cd3d,Cd3e,Cd3g,Col10a1,Cpa3,Crip3,Ctcf,Dck,Dffb,E2f2,Elavl1,Ets1,Ewsr1,Fadd,Fbln1,Fbxo30,Flt3,Foxn1,Ikzf1,Il6st,Kit,Lat,Mcl1,Mdm4,Mll5,Msi2,Myb,Nhej1,Notch1,Pbx1,Pdgfrb,Pfdn1,Pnp,Prf1,Ptch1,Ptcra,Relb,Rhoh,Rpl22,Runx1,Sgpl1,Sit1,Smad3,Sox4,Ssbp2,Stk11,Stub1,Tcf12,Tcf3,Tgfb1,Tnf,Trp53,Vav1,Vav2,Vdr,Vegfa,Xrcc6,Zap70,Zfp36	NA	Adam10,Aff1,Bag4,Bcl11a,Cacna2d2,Cbl,Cd247,Col10a1,Cpa3,Crlf2,Ctcf,Ctsd,Dck,Dffb,Dll4,E2f2,Esr2,Ewsr1,Fbxo30,Flt3,Foxp3,Fyn,Gfi1,Ikzf1,Il2rb,Il2rg,Kit,Lat,Lcp2,Mcl1,Mdm2,Mesp1,Mll5,Msi2,Myb,Nbn,Nfatc3,Nfkb1,Nhej1,Notch1,Pfdn1,Ppp3r1,Ptcra,Rag1,Rhoh,Rpl22,Runx1,Sox17,Tgfb1,Trp53,Vav1,Xrcc6	NA	NA	NA	NA	NA	NA	NA	NA	NA
Mouse Phenotype	tumorigenesis	0										0		1190003J15Rik,2700078K21Rik,Abcb4,Ace,Adam15,Adipoq,Aes,Akt1,Akt3,Amh,Amhr2,Antxr1,Apc,Asph,Atp2a2,Aurkb,B2m,Bag1,Bard1,Bax,Becn1,Bin3,Braf,Brca2,Casc1,Ccl2,Ccnd1,Ccr2,Cd19,Cd34,Cd44,Cdk11b,Cdk4,Cdkn1b,Cdkn2a,Cdkn2b,Cdsn,Cdx2,Cebpa,Cebpb,Chd2,Chek1,Chuk,Cks1b,Ctnnb1,Cul9,Cxcl16,Cxcr2,Cxcr3,Cxcr6,Cytip,Dgkd,Dmtf1,Dnd1,Dok2,Eef1a1,Egr1,Erbb3,Ercc1,Errfi1,Esam,Ets2,Ewsr1,F2r,F3,Fasl,Fbxo30,Fgfr2,Flc…	NA	NA	NA	NA	NA	NA	NA	NA	NA	2700078K21Rik,Abcb4,Ace,Aes,Aip,Akt1,Amelx,Antxr1,Ar,Arid4a,Arid4b,Asph,Atm,Aurkb,B2m,Bax,Becn1,Blm,Bmpr1a,Casp1,Ccne1,Ccr2,Cd19,Cd226,Cd44,Cd47,Cdkn1b,Cdx2,Cebpb,Chd2,Chek2,Cks1b,Ctsg,Cxcr6,Cygb,Cyp1a2,Dear1,Dek,Dicer1,Dkc1,Dnd1,Dok1,Dok3,Dph1,E2f4,Egr1,Eif4e,Erbb2,Erbb3,Ercc1,Esam,Esr2,Ets2,Ewsr1,F2r,Fasl,Fgf2,Figf,Fli1,Fntb,Foxn1,Foxo3,Fut7,Fzr1,Gadd45a,Gast,Ggta1,Gli1,Gnai2,Gnmt,Gprc5a,Grb2,G…	NA
MSigDB Pathway	Alzheimer s disease	0												Adam10,Adam17,Apaf1,Apoe,Atf6,Atp2a1,Atp2a2,Atp2a3,Atp5b,Atp5d,Atp5g1,Atp5g3,Atp5h,Cacna1c,Cacna1s,Casp3,Casp9,Cox4i1,Cox5a,Cox7b,Cox7c,Ctnna2,Fadd,Gapdh,Gapdh,Gapdh,Gnaq,Gsk3b,Itpr1,Itpr3,Lrp1,Ncstn,Ndufa10,Ndufa2,Ndufa4l2,Ndufa6,Ndufa7,Ndufa9,Ndufb2,Ndufb3,Ndufb5,Ndufb6,Ndufb7,Ndufb8,Ndufb9,Ndufc1,Ndufs1,Ndufs2,Ndufs3,Ndufs7,Plcb2,Plcb4,Ppp3ca,Psen1,Ptgs2,Sdha,Sdhc,Sdhd,Tnf,Uqcr10,Uqcrb,Uqcrh,U…	NA	NA	NA	NA	NA	NA	NA	NA	NA	NA	NA
MSigDB Pathway	Antigen processing and presentation	0						1.03212e-37				1.77119e-162		B2m,Calr,Canx,Cd74,Creb1,Hspa1a,Hspa1b,Hspa1l,Hspa4,Hspa5,Hspa8,Ifna1,Ifna4,Ifna5,Ifna6,Ifna7,Klrc1,Klrc2,Klrc3,Lta,Pdia3,Psme3,Tap1,Tap2,Tapbp	NA	NA	NA	NA	NA	Hsp90aa1,Hspa1a,Hspa1b,Hspa1l,Hspa4,Hspa5,Nfya,Pdia3	NA	NA	NA	B2m,Calr,Canx,Ctss,Hspa1a,Hspa1b,Hspa1l,Hspa4,Hspa5,Ifna1,Ifna4,Ifna5,Ifna6,Ifna7,Lgmn,Nfya,Psme1,Psme3,Rfx5,Tap1,Tap2	NA
MSigDB Pathway	B cell receptor signaling pathway	1.9041e-207												Akt1,Akt3,Bcl10,Cd19,Cd22,Cd72,Cd79a,Cd81,Chuk,Ctnna2,Dapp1,Fcgr2b,Fos,Grb2,Gsk3b,Ifitm1,Inpp5d,Lilrb3,Lyn,Nfkbia,Nfkbie,Pik3ap1,Pik3r1,Pik3r3,Ppp3ca,Ptpn6,Rac2,Rasgrp3,Sos1,Sos2,Sykb,Vav1,Vav2,Vav3	NA	NA	NA	NA	NA	NA	NA	NA	NA	NA	NA
MSigDB Pathway	Chemokine signaling pathway	0										0		Adcy2,Adrbk1,Adrbk2,Akt1,Akt3,Arrb2,Braf,Ccl1,Ccl11,Ccl2,Ccl25,Ccl3,Ccl5,Ccl7,Ccr1,Ccr10,Ccr2,Ccr3,Ccr4,Ccr5,Ccr7,Ccr8,Chuk,Crk,Cx3cr1,Cxcl1,Cxcl14,Cxcl16,Cxcl2,Cxcl3,Cxcl5,Cxcr2,Cxcr3,Cxcr4,Cxcr6,Dock2,Fgr,Gnai2,Gnb4,Gng11,Gng3,Gngt1,Grb2,Grk6,Gsk3b,Lyn,Nfkbia,Pf4,Pik3r1,Pik3r3,Plcb2,Plcb4,Ppbp,Prex1,Prkcd,Prkcz,Pxn,Rac2,Rhoa,Rock2,Sos1,Sos2,Stat1,Tiam1,Vav1,Vav2,Vav3,Xcr1	NA	NA	NA	NA	NA	NA	NA	NA	NA	Adcy4,Adcy6,Adcy9,Adrbk2,Akt1,Arrb1,Bcar1,Ccl17,Ccl22,Ccr1,Ccr10,Ccr2,Ccr3,Ccr5,Ccr7,Ccr8,Csk,Cx3cl1,Cx3cr1,Cxcl1,Cxcl2,Cxcl3,Cxcl5,Cxcr6,Fgr,Foxo3,Gnai1,Gnai2,Gnai3,Gnb2,Gnb4,Gng12,Gngt2,Grb2,Grk5,Grk6,Gsk3a,Itk,Map2k1,Nfkb1,Pf4,Pik3cb,Pik3r1,Ppbp,Prkcd,Ptk2,Rac2,Rap1a,Rhoa,Rock2,Stat3,Tiam1,Vav1,Vav2,Vav3,Was,Xcr1	NA
MSigDB Pathway	Fc gamma R-mediated phagocytosis	3.79863e-298												Akt1,Akt3,Arf6,Arpc1b,Arpc2,Arpc5,Arpc5l,Cfl1,Crk,Dock2,Fcgr2b,Fcgr4,Inpp5d,Lat,Limk2,Lyn,Marcksl1,Pik3r1,Pik3r3,Pip5k1b,Pip5k1c,Pla2g4a,Pla2g4d,Pla2g4e,Pla2g4f,Pla2g6,Plcg1,Prkca,Prkcd,Prkce,Rac2,Rps6kb1,Scin,Sykb,Vasp,Vav1,Vav2,Vav3,Wasf2	NA	NA	NA	NA	NA	NA	NA	NA	NA	NA	NA
MSigDB Pathway	Genes involved in Apoptosis	0	0									0		Acin1,Akt1,Apaf1,Apc,Arhgap10,Bak1,Bax,Birc2,Casp3,Casp9,Cflar,Ctnnb1,Dbnl,Dffb,Dynll1,Fadd,Gas2,Hist1h1a,Hist1h1b,Hist1h1c,Hist1h1d,Hist1h1e,Icam1,Kpnb1,Lmna,Nmt1,Pak2,Parp10,Pkp1,Pmaip1,Prkcd,Prkcq,Psma2,Psma5,Psma6,Psmb1,Psmb5,Psmb8,Psmb9,Psmc1,Psmc3,Psmc6,Psmd11,Psmd12,Psmd13,Psmd2,Psmd7,Psmd8,Psmd9,Psme3,Rock2,Tnf,Tradd,Traf2,Vim	Akt1,Apaf1,Bbc3,Birc2,Hist1h1a,Hist1h1b,Hist1h1c,Hist1h1d,Hist1h1e,Kpnb1,Lmna,Prkcq,Psmc3,Psmd13,Psmd3,Psmd9,Tnf,Ubb	NA	NA	NA	NA	NA	NA	NA	NA	Acin1,Add1,Akt1,Arhgap10,Bak1,Bax,Bcl2l11,Bid,Birc2,Bmx,Casp3,Casp7,Casp9,Cflar,Fadd,Gzmb,Hist1h1a,Hist1h1c,Hist1h1d,Hist1h1e,Mapt,Nkx3-1,Nmt1,Ocln,Parp10,Pkp1,Prkcd,Prkcq,Psma2,Psmb2,Psmb7,Psmb8,Psmb9,Psmc3,Psmc6,Psmd10,Psmd12,Psmd3,Psmd4,Psmd7,Psmd8,Psmd9,Psme1,Psme3,Psmf1,Ptk2,Rock2,Stk24,Tjp1,Tnfrsf1a,Traf2,Ubb,Vim,Xiap	NA
MSigDB Pathway	Genes involved in Apoptosis induced DNA fragmentation	2.00925e-183	0	3.62224e-45			1.35711e-32	2.67203e-151		3.7714e-24				Casp3,Dffb,Hist1h1a,Hist1h1b,Hist1h1c,Hist1h1d,Hist1h1e,Icam1,Kpnb1	Hist1h1a,Hist1h1b,Hist1h1c,Hist1h1d,Hist1h1e,Kpnb1	Casp3,Dffb,Hist1h1a,Hist1h1b,Hist1h1c,Hist1h1d,Hist1h1e,Icam1	NA	NA	Casp3,Dffb,Hist1h1a,Hist1h1b,Hist1h1c,Hist1h1d,Hist1h1e	Hist1h1a,Hist1h1b,Hist1h1c,Hist1h1d,Hist1h1e	NA	Hist1h1a,Hist1h1c,Hist1h1d,Hist1h1e,Icam1	NA	NA	NA
MSigDB Pathway	Genes involved in Chemokine receptors bind chemokines	2.94234e-170												Ccbp2,Ccl11,Ccl2,Ccl25,Ccl3,Ccl5,Ccl7,Ccr1,Ccr10,Ccr2,Ccr3,Ccr4,Ccr5,Ccr7,Ccr8,Cx3cr1,Cxcl1,Cxcl16,Cxcl2,Cxcl3,Cxcl5,Cxcr2,Cxcr3,Cxcr4,Cxcr6,Cxcr7,Pf4,Ppbp,Xcr1	NA	NA	NA	NA	NA	NA	NA	NA	NA	NA	NA
MSigDB Pathway	Genes involved in Diabetes pathways	0						6.08687e-89						Atf3,Atf6,Atp5b,Atp5d,Atp5g1,Atp5h,Atp5l,Cacna1a,Cacna1c,Cox4i1,Cox5a,Cox7b,Cox7c,Cs,Ddit3,Ddost,Dnajb9,Eno2,Eno3,Ero1l,Etfb,Etfdh,Exoc2,Exoc6,Exoc8,Ffar1,Gapdh,Gapdh,Gapdh,Ghrl,Glp1r,Gm15427,Gna11,Gna14,Gna15,Gnai2,Gnaq,Gnb4,Gng11,Gng3,Gngt1,Herpud1,Hspa5,Idh2,Igfals,Igfbp4,Itpr1,Itpr3,Kcng2,Mdh2,Mmp2,Ndufa10,Ndufa13,Ndufa2,Ndufa6,Ndufa7,Ndufa9,Ndufb11,Ndufb2,Ndufb3,Ndufb5,Ndufb6,Ndufb7,Ndufb8,N…	NA	NA	NA	NA	NA	Atp5d,Cacna1a,Ddit3,Ern1,Gapdh,Hspa5,Idh3b,Igfals,Ndufa2,Nfya,Rpl10a,Rpl12,Rpl22,Rpl3,Rpl41,Rps19,Rps26,Rps5,Rps7,Ubc	NA	NA	NA	NA	NA
MSigDB Pathway	Genes involved in Electron Transport Chain	6.65422e-192												Cox4i1,Cox5a,Cox7b,Cox7c,Etfb,Etfdh,Ndufa10,Ndufa13,Ndufa2,Ndufa6,Ndufa7,Ndufa9,Ndufb11,Ndufb2,Ndufb3,Ndufb5,Ndufb6,Ndufb7,Ndufb8,Ndufb9,Ndufc1,Ndufs1,Ndufs2,Ndufs3,Ndufs7,Ptgs2,Sdha,Sdhc,Sdhd,Uqcr10,Uqcrb,Uqcrh,Uqcrq	NA	NA	NA	NA	NA	NA	NA	NA	NA	NA	NA
MSigDB Pathway	Genes involved in Elongation and Processing of Capped Transcripts	0												Cd2bp2,Clp1,Cobra1,Ctdp1,Ddx23,Dhx9,Dnajc8,Eftud2,Ell,Gtf2h3,Gtf2h4,Hexim1,Hnrnpa0,Hnrnpa1,Hnrnpa2b1,Hnrnpa3,Hnrnpc,Hnrnpl,Hnrnpul1,Magoh,Mettl3,Nhp2l1,Pcbp1,Polr2a,Polr2g,Polr2j,Prpf6,Rdbp,Rnps1,Sf3a2,Sf3a3,Sf3b1,Snrnp200,Snrnp70,Snrpa1,Snrpd1,Snrpd2,Snrpd3,Snrpe,Snrpg,Srrm1,Srsf1,Srsf11,Srsf5,Srsf7,Sugp1,Supt16h,Supt4h1,Supt5h,Tcea1,Tceb1,Tceb2,Tceb3,Thoc4,U2af1	NA	NA	NA	NA	NA	NA	NA	NA	NA	NA	NA
MSigDB Pathway	Genes involved in Formation of a pool of free 40S subunits	0						4.32089e-45						Eif3a,Eif3d,Eif3g,Eif3j,Eif3k,Gm15427,Rpl10,Rpl11,Rpl13,Rpl14,Rpl17,Rpl19,Rpl22,Rpl23,Rpl26,Rpl27,Rpl27a,Rpl28,Rpl29,Rpl32,Rpl35,Rpl35a,Rpl36,Rpl37a,Rpl38,Rpl4,Rpl41,Rpl6,Rpl9,Rplp0,Rps10,Rps11,Rps12,Rps14,Rps16,Rps17,Rps18,Rps19,Rps20,Rps21,Rps26,Rps27,Rps27a,Rps28,Rps6,Rps7,Rps8,Rps9,Rpsa,Uba52	NA	NA	NA	NA	NA	Rpl10a,Rpl12,Rpl22,Rpl3,Rpl41,Rps19,Rps26,Rps5,Rps7,Ubc	NA	NA	NA	NA	NA
MSigDB Pathway	Genes involved in Formation of Platelet plug	0							1.09427e-107			0		Actn4,Adra2b,Akt1,Akt3,Apoa1,Brpf3,Cap1,Cd63,Cfl1,Crk,Dgkd,Dgkq,F2r,F2rl2,F2rl3,F3,Fcer1g,Flna,Gna11,Gna13,Gna14,Gna15,Gnai2,Gnaq,Gnb4,Gng11,Gng3,Gngt1,Gp1ba,Gp5,Gp9,Grb2,Hspa5,Itga2,Itpr1,Itpr3,Lyn,Mapk14,P2rx1,P2ry12,Pdgfa,Pdpk1,Pecam1,Pf4,Pfn1,Pik3r1,Pla2g4a,Plek,Ppbp,Ppia,Prkca,Prkcz,Psap,Ptpn1,Rasgrp3,Selp,Serping1,Sos1,Srgn,Stxbp3a,Sykb,Tbxa2r,Tgfb1,Tmsb4x,Tuba4a,Vav1,Vav2,Vav3,Vcl,Vegfa,Ve…	NA	NA	NA	NA	NA	NA	Adra2b,Akt1,Crk,F2r,F2rl2,F2rl3,F5,Gnaq,Gp9,Itgb3,Lyn,P2ry12,Pdgfa,Pdgfb,Pik3r1,Pla2g4a,Plcg2,Psap,Ptpn1,Tmsb4x	NA	NA	Actn4,Akt1,Apoa1,Bcar1,Brpf3,Calm3,Cap1,Cd9,Cfl1,Csk,Daglb,F2,F2r,F2rl2,F8,Figf,Gna11,Gna13,Gna15,Gnai1,Gnai2,Gnai3,Gnb2,Gnb4,Gng12,Gngt2,Gp1ba,Gp5,Gp9,Grb2,Hspa5,Itgb3,Itpr2,Itpr3,Lamp2,Lcp2,Mapk14,Mgll,Mmrn1,P2ry1,Pdgfb,Pdk1,Pf4,Pfn1,Pik3cb,Pik3r1,Plcg2,Plek,Ppbp,Prkca,Pros1,Psap,Ptk2,Ptpn1,Rap1a,Serping1,Sparc,Tgfb1,Tln1,Tuba4a,Vav1,Vav2,Vav3,Vcl	NA
MSigDB Pathway	Genes involved in Formation of the ternary complex, and subsequently, the 43S complex	5.5388e-161												Eif3a,Eif3d,Eif3g,Eif3j,Eif3k,Rps10,Rps11,Rps12,Rps14,Rps16,Rps17,Rps18,Rps19,Rps20,Rps21,Rps26,Rps27,Rps27a,Rps28,Rps6,Rps7,Rps8,Rps9,Rpsa	NA	NA	NA	NA	NA	NA	NA	NA	NA	NA	NA
MSigDB Pathway	Genes involved in Gene Expression	0						3.64733e-149						Aars,Aars2,Aimp2,Cars2,Ccnc,Cd2bp2,Cdk19,Clp1,Cobra1,Ctdp1,Ddx23,Dhx9,Dnajc8,Eef1a1,Eef1b2,Eef2,Eftud2,Eif2b1,Eif2b4,Eif3a,Eif3d,Eif3g,Eif3j,Eif3k,Eif4a1,Eif4a2,Eif5b,Ell,Etf1,Farsa,Farsb,Gm15427,Gtf2a2,Gtf2h3,Gtf2h4,Hars,Hars2,Hexim1,Hnf4a,Hnrnpa0,Hnrnpa1,Hnrnpa2b1,Hnrnpa3,Hnrnpc,Hnrnpl,Hnrnpul1,Lars,Magoh,Maml1,Maml2,Maml3,Mars,Med15,Med16,Med17,Med20,Med8,Mettl3,Nars,Nars2,Nhp2l1,Notch1,Notch2…	NA	NA	NA	NA	NA	Aimp1,Cars2,Dnajc8,Eef1a1,Eef1e1,Eif4a1,Eprs,Gtf2f1,Hars,Hars2,Hnrnpa2b1,Mars,Med1,Polr2a,Ptbp1,Rpl10a,Rpl12,Rpl22,Rpl3,Rpl41,Rps19,Rps26,Rps5,Rps7,Sf3a1,Srrm1,Srsf2,Taf12,Taf13,Tars2,Txnl4a,Ubc,Vars	NA	NA	NA	NA	NA
MSigDB Pathway	Genes involved in Glucose Regulation of Insulin Secretion	0												Atp5b,Atp5d,Atp5g1,Atp5h,Atp5l,Cacna1a,Cacna1c,Cox4i1,Cox5a,Cox7b,Cox7c,Cs,Eno2,Eno3,Etfb,Etfdh,Gapdh,Gapdh,Gapdh,Gnai2,Idh2,Mdh2,Ndufa10,Ndufa13,Ndufa2,Ndufa6,Ndufa7,Ndufa9,Ndufb11,Ndufb2,Ndufb3,Ndufb5,Ndufb6,Ndufb7,Ndufb8,Ndufb9,Ndufc1,Ndufs1,Ndufs2,Ndufs3,Ndufs7,Pdhx,Pgam2,Pgk1,Pklr,Ptgs2,Sdha,Sdhc,Sdhd,Slc25a4,Slc2a1,Snap25,Suclg2,Tpi1,Uqcr10,Uqcrb,Uqcrh,Uqcrq	NA	NA	NA	NA	NA	NA	NA	NA	NA	NA	NA
MSigDB Pathway	Genes involved in GTP hydrolysis and joining of the 60S ribosomal subunit	0						1.53303e-49						Eif3a,Eif3d,Eif3g,Eif3j,Eif3k,Eif4a1,Eif4a2,Eif5b,Gm15427,Rpl10,Rpl11,Rpl13,Rpl14,Rpl17,Rpl19,Rpl22,Rpl23,Rpl26,Rpl27,Rpl27a,Rpl28,Rpl29,Rpl32,Rpl35,Rpl35a,Rpl36,Rpl37a,Rpl38,Rpl4,Rpl41,Rpl6,Rpl9,Rplp0,Rps10,Rps11,Rps12,Rps14,Rps16,Rps17,Rps18,Rps19,Rps20,Rps21,Rps26,Rps27,Rps27a,Rps28,Rps6,Rps7,Rps8,Rps9,Rpsa,Uba52	NA	NA	NA	NA	NA	Eif4a1,Rpl10a,Rpl12,Rpl22,Rpl3,Rpl41,Rps19,Rps26,Rps5,Rps7,Ubc	NA	NA	NA	NA	NA
MSigDB Pathway	Genes involved in Hemostasis	0							1.00821e-132			0		Actn4,Adra2b,Akt1,Akt3,Apoa1,Atp1b2,Atp1b3,Brpf3,Bsg,Cap1,Cd244,Cd48,Cd63,Cd84,Cfl1,Crk,Dgkd,Dgkq,Dok2,Esam,F11r,F12,F2r,F2rl2,F2rl3,F3,Fcer1g,Flna,Gna11,Gna13,Gna14,Gna15,Gnai2,Gnaq,Gnb4,Gng11,Gng3,Gngt1,Gp1ba,Gp5,Gp9,Grb2,Hspa5,Inpp5d,Itga2,Itga3,Itgam,Itgav,Itpr1,Itpr3,Lyn,Mag,Mapk14,P2rx1,P2ry12,Pdgfa,Pdpk1,Pecam1,Pf4,Pfn1,Pik3r1,Pla2g4a,Plau,Plaur,Plcg1,Plek,Ppbp,Ppia,Prkca,Prkcz,Psap,Ptpn1,…	NA	NA	NA	NA	NA	NA	Adra2b,Akt1,Angpt1,Cd244,Cd48,Cd84,Crk,F11r,F2r,F2rl2,F2rl3,F5,Gnaq,Gp9,Itgb3,Lyn,P2ry12,Pdgfa,Pdgfb,Pik3r1,Pla2g4a,Plcg2,Psap,Ptpn1,Serpinb2,Tmsb4x	NA	NA	Actn4,Akt1,Angpt1,Apoa1,Atp1b3,Bcar1,Brpf3,Bsg,C1qbp,Calm3,Cap1,Cd177,Cd47,Cd9,Cfl1,Csk,Daglb,Esam,F12,F2,F2r,F2rl2,F8,Figf,Gna11,Gna13,Gna15,Gnai1,Gnai2,Gnai3,Gnb2,Gnb4,Gng12,Gngt2,Gp1ba,Gp5,Gp9,Grb2,Grb7,Hspa5,Inpp5d,Itga3,Itga4,Itga5,Itga6,Itgb2,Itgb3,Itpr2,Itpr3,Lamp2,Lcp2,Mapk14,Mgll,Mmrn1,P2ry1,Pdgfb,Pdk1,Pf4,Pfn1,Pik3cb,Pik3r1,Plau,Plaur,Plcg1,Plcg2,Plek,Ppbp,Prcp,Prkca,Pros1,Psap,Ptk2,Ptp…	NA
MSigDB Pathway	Genes involved in Immunoregulatory interactions between a Lymphoid and a non-Lymphoid cell	5.96645e-191												1300017J02Rik,B2m,Cd19,Cd247,Cd34,Cd3d,Cd3e,Cd3g,Cd81,Fcgr2b,Fcgr4,Gp49a,Hcst,Icam1,Icam4,Icam5,Ifitm1,Itgb7,Klrc1,Lilrb3,Lilrb4,Pvr,Pvrl2,Raet1d,Sell,Tyrobp	NA	NA	NA	NA	NA	NA	NA	NA	NA	NA	NA
MSigDB Pathway	Genes involved in Influenza Life Cycle	0						1.35339e-72						Calr,Canx,Clta,Cltc,Gm15427,Hspa1a,Hspa1b,Kpnb1,Nup188,Nup50,Nup54,Polr2a,Polr2g,Polr2j,Ran,Ranbp2,Rpl10,Rpl11,Rpl13,Rpl14,Rpl17,Rpl19,Rpl22,Rpl23,Rpl26,Rpl27,Rpl27a,Rpl28,Rpl29,Rpl32,Rpl35,Rpl35a,Rpl36,Rpl37a,Rpl38,Rpl4,Rpl41,Rpl6,Rpl9,Rplp0,Rps10,Rps11,Rps12,Rps14,Rps16,Rps17,Rps18,Rps19,Rps20,Rps21,Rps26,Rps27,Rps27a,Rps28,Rps6,Rps7,Rps8,Rps9,Rpsa,Uba52	NA	NA	NA	NA	NA	Cltc,Gtf2f1,Hsp90aa1,Hspa1a,Hspa1b,Polr2a,Rpl10a,Rpl12,Rpl22,Rpl3,Rpl41,Rps19,Rps26,Rps5,Rps7,Ubc	NA	NA	NA	NA	NA
MSigDB Pathway	Genes involved in Influenza Viral RNA Transcription and Replication	0						1.61196e-59						Gm15427,Polr2a,Polr2g,Polr2j,Rpl10,Rpl11,Rpl13,Rpl14,Rpl17,Rpl19,Rpl22,Rpl23,Rpl26,Rpl27,Rpl27a,Rpl28,Rpl29,Rpl32,Rpl35,Rpl35a,Rpl36,Rpl37a,Rpl38,Rpl4,Rpl41,Rpl6,Rpl9,Rplp0,Rps10,Rps11,Rps12,Rps14,Rps16,Rps17,Rps18,Rps19,Rps20,Rps21,Rps26,Rps27,Rps27a,Rps28,Rps6,Rps7,Rps8,Rps9,Rpsa,Uba52	NA	NA	NA	NA	NA	Gtf2f1,Hsp90aa1,Polr2a,Rpl10a,Rpl12,Rpl22,Rpl3,Rpl41,Rps19,Rps26,Rps5,Rps7,Ubc	NA	NA	NA	NA	NA
MSigDB Pathway	Genes involved in Insulin Synthesis and Secretion	0						8.63767e-44						Ddost,Ero1l,Gm15427,Gnai2,Pdx1,Rpl10,Rpl11,Rpl13,Rpl14,Rpl17,Rpl19,Rpl22,Rpl23,Rpl26,Rpl27,Rpl27a,Rpl28,Rpl29,Rpl32,Rpl35,Rpl35a,Rpl36,Rpl37a,Rpl38,Rpl4,Rpl41,Rpl6,Rpl9,Rplp0,Rpn1,Rps10,Rps11,Rps12,Rps14,Rps16,Rps17,Rps18,Rps19,Rps20,Rps21,Rps26,Rps27,Rps27a,Rps28,Rps6,Rps7,Rps8,Rps9,Rpsa,Sec61a1,Sec61a2,Sec61g,Snap25,Spcs2,Spcs3,Srp54a,Srp54c,Srp68,Ssr1,Uba52	NA	NA	NA	NA	NA	Rpl10a,Rpl12,Rpl22,Rpl3,Rpl41,Rps19,Rps26,Rps5,Rps7,Ubc	NA	NA	NA	NA	NA
MSigDB Pathway	Genes involved in Metabolism of proteins	0						6.75666e-65				0		Ap3m1,Cct4,Cct8,Dpm3,Eef1a1,Eef1b2,Eef2,Eif2b1,Eif2b4,Eif3a,Eif3d,Eif3g,Eif3j,Eif3k,Eif4a1,Eif4a2,Eif5b,Etf1,Fbxl3,Fbxl5,Fbxo30,Fbxw2,Fbxw5,Ggcx,Gm15427,Kif13a,Pfdn1,Pfdn2,Pigc,Pigg,Pigm,Pign,Pigq,Pigv,Pigw,Pigx,Plaur,Rpl10,Rpl11,Rpl13,Rpl14,Rpl17,Rpl19,Rpl22,Rpl23,Rpl26,Rpl27,Rpl27a,Rpl28,Rpl29,Rpl32,Rpl35,Rpl35a,Rpl36,Rpl37a,Rpl38,Rpl4,Rpl41,Rpl6,Rpl9,Rplp0,Rps10,Rps11,Rps12,Rps14,Rps16,Rps17,R…	NA	NA	NA	NA	NA	Eef1a1,Eif4a1,Fbxw2,Nop56,Pigl,Rpl10a,Rpl12,Rpl22,Rpl3,Rpl41,Rps19,Rps26,Rps5,Rps7,Ubc	NA	NA	NA	Ap3m1,Cct2,Dhps,Dohh,Eef1g,Eif2s1,Eif3c,Eif3d,Eif3g,Eif3i,Eif3k,Eif4a1,Eif4e,Eif4ebp1,Eif5a2,Eif5b,Etf1,F2,Fbxl3,Fbxw2,Fbxw4,Fbxw5,Fkbp9,Ggcx,Lonp2,Nop56,Pfdn1,Pigc,Pigl,Pigo,Pigq,Pigv,Pigw,Plaur,Pros1,Rpl11,Rpl13,Rpl14,Rpl19,Rpl22,Rpl23a,Rpl27,Rpl27a,Rpl29,Rpl3,Rpl32,Rpl36,Rpl37,Rpl41,Rpl5,Rpl6,Rplp1,Rps15a,Rps16,Rps21,Rps26,Rps3,Rps7,Rpsa,Tbcb,Tbcd,Tbce,Tuba4a,Tubb2c,Tubb3,Tubb6,Uba52,Xrn2	NA
MSigDB Pathway	Genes involved in Packaging Of Telomere Ends	0	0	9.57957e-154			8.83733e-143	0		6.08898e-74		2.33759e-212		Acd,H2afb1,H2afx,Hist1h2ab,Hist1h2ac,Hist1h2ae,Hist1h2ai,Hist1h2ak,Hist1h2an,Hist1h2ap,Hist1h2bb,Hist1h2bc,Hist1h2be,Hist1h2bf,Hist1h2bg,Hist1h2bh,Hist1h2bl,Hist1h2bm,Hist1h2bn,Hist1h3d,Hist1h4a,Hist1h4b,Hist1h4c,Hist1h4d,Hist1h4f,Hist1h4h,Hist1h4j,Hist1h4k,Hist2h2ac,Hist2h2be	H2afx,Hist1h2ab,Hist1h2ac,Hist1h2ae,Hist1h2ag,Hist1h2ai,Hist1h2ak,Hist1h2an,Hist1h2ap,Hist1h2bb,Hist1h2bc,Hist1h2be,Hist1h2bf,Hist1h2bg,Hist1h2bh,Hist1h2bj,Hist1h2bk,Hist1h2bl,Hist1h2bm,Hist1h2bn,Hist1h3d,Hist1h4a,Hist1h4b,Hist1h4c,Hist1h4d,Hist1h4f,Hist1h4h,Hist1h4i,Hist1h4j,Hist1h4k,Hist2h2ac,Hist2h2be,Terf2ip	Acd,Hist1h2ab,Hist1h2ac,Hist1h2ae,Hist1h2ai,Hist1h2ak,Hist1h2an,Hist1h2ap,Hist1h2bb,Hist1h2bc,Hist1h2be,Hist1h2bf,Hist1h2bg,Hist1h2bh,Hist1h2bl,Hist1h2bm,Hist1h2bn,Hist1h3d,Hist1h4a,Hist1h4b,Hist1h4c,Hist1h4d,Hist1h4f,Hist1h4h,Hist1h4j,Hist1h4k	NA	NA	H2afb1,Hist1h2ab,Hist1h2ac,Hist1h2ae,Hist1h2ag,Hist1h2ai,Hist1h2ak,Hist1h2an,Hist1h2ap,Hist1h2bb,Hist1h2bc,Hist1h2be,Hist1h2bf,Hist1h2bg,Hist1h2bh,Hist1h2bj,Hist1h2bk,Hist1h2bl,Hist1h2bm,Hist1h2bn,Hist1h3d,Hist1h4a,Hist1h4b,Hist1h4c,Hist1h4d,Hist1h4f,Hist1h4h,Hist1h4i,Hist1h4j,Hist1h4k,Terf2ip	H2afx,Hist1h2ab,Hist1h2ac,Hist1h2ae,Hist1h2ag,Hist1h2ai,Hist1h2ak,Hist1h2an,Hist1h2ap,Hist1h2bb,Hist1h2bc,Hist1h2be,Hist1h2bf,Hist1h2bg,Hist1h2bh,Hist1h2bj,Hist1h2bk,Hist1h2bl,Hist1h2bm,Hist1h2bn,Hist1h3d,Hist1h4a,Hist1h4b,Hist1h4c,Hist1h4d,Hist1h4f,Hist1h4h,Hist1h4i,Hist1h4j,Hist1h4k	NA	Hist1h2ab,Hist1h2ac,Hist1h2ae,Hist1h2bb,Hist1h2bc,Hist1h2be,Hist1h2bf,Hist1h2bg,Hist1h2bh,Hist1h3d,Hist1h4a,Hist1h4b,Hist1h4c,Hist1h4d,Hist1h4f,Hist1h4h	NA	Acd,H2afx,Hist1h2ab,Hist1h2ac,Hist1h2ae,Hist1h2bb,Hist1h2bc,Hist1h2be,Hist1h2bf,Hist1h2bg,Hist1h2bh,Hist1h3d,Hist1h4a,Hist1h4b,Hist1h4c,Hist1h4d,Hist1h4f,Hist1h4h,Hist2h2ac,Hist2h2be,Terf2ip	NA
MSigDB Pathway	Genes involved in Peptide chain elongation	0						1.92918e-50						Eef1a1,Eef2,Gm15427,Rpl10,Rpl11,Rpl13,Rpl14,Rpl17,Rpl19,Rpl22,Rpl23,Rpl26,Rpl27,Rpl27a,Rpl28,Rpl29,Rpl32,Rpl35,Rpl35a,Rpl36,Rpl37a,Rpl38,Rpl4,Rpl41,Rpl6,Rpl9,Rplp0,Rps10,Rps11,Rps12,Rps14,Rps16,Rps17,Rps18,Rps19,Rps20,Rps21,Rps26,Rps27,Rps27a,Rps28,Rps6,Rps7,Rps8,Rps9,Rpsa,Uba52	NA	NA	NA	NA	NA	Eef1a1,Rpl10a,Rpl12,Rpl22,Rpl3,Rpl41,Rps19,Rps26,Rps5,Rps7,Ubc	NA	NA	NA	NA	NA
MSigDB Pathway	Genes involved in Platelet Activation	0							3.96183e-94			0		Actn4,Akt1,Akt3,Apoa1,Brpf3,Cap1,Cd63,Cfl1,Dgkd,Dgkq,F2r,F2rl2,F2rl3,F3,Fcer1g,Flna,Gna11,Gna13,Gna14,Gna15,Gnai2,Gnaq,Gnb4,Gng11,Gng3,Gngt1,Gp1ba,Gp5,Gp9,Hspa5,Itpr1,Itpr3,Lyn,Mapk14,P2rx1,P2ry12,Pdgfa,Pdpk1,Pecam1,Pf4,Pfn1,Pik3r1,Pla2g4a,Plek,Ppbp,Ppia,Prkca,Prkcz,Psap,Selp,Serping1,Srgn,Stxbp3a,Sykb,Tbxa2r,Tgfb1,Tmsb4x,Tuba4a,Vav1,Vav2,Vav3,Vcl,Vegfa,Vegfc	NA	NA	NA	NA	NA	NA	Akt1,F2r,F2rl2,F2rl3,F5,Gnaq,Gp9,Itgb3,Lyn,P2ry12,Pdgfa,Pdgfb,Pik3r1,Pla2g4a,Plcg2,Psap,Tmsb4x	NA	NA	Actn4,Akt1,Apoa1,Brpf3,Calm3,Cap1,Cd9,Cfl1,Daglb,F2,F2r,F2rl2,F8,Figf,Gna11,Gna13,Gna15,Gnai1,Gnai2,Gnai3,Gnb2,Gnb4,Gng12,Gngt2,Gp1ba,Gp5,Gp9,Hspa5,Itgb3,Itpr2,Itpr3,Lamp2,Lcp2,Mapk14,Mgll,Mmrn1,P2ry1,Pdgfb,Pdk1,Pf4,Pfn1,Pik3cb,Pik3r1,Plcg2,Plek,Ppbp,Prkca,Pros1,Psap,Serping1,Sparc,Tgfb1,Tln1,Tuba4a,Vav1,Vav2,Vav3,Vcl	NA
MSigDB Pathway	Genes involved in Platelet activation triggers	1.41561e-188							3.50988e-56					Akt1,Akt3,F2r,F2rl2,F2rl3,Fcer1g,Gna11,Gna13,Gna14,Gna15,Gnai2,Gnaq,Gnb4,Gng11,Gng3,Gngt1,Lyn,Mapk14,P2ry12,Pdpk1,Pik3r1,Pla2g4a,Prkcz,Sykb,Tbxa2r,Vav1,Vav2,Vav3	NA	NA	NA	NA	NA	NA	Akt1,F2r,F2rl2,F2rl3,Gnaq,Lyn,P2ry12,Pik3r1,Pla2g4a,Plcg2	NA	NA	NA	NA
MSigDB Pathway	Genes involved in Prostanoid hormones	1.04967e-72										6.09433e-64		Abcc1,Ggt5,Lta4h,Ptges3,Ptgis,Ptgs1,Ptgs2,Tbxas1	NA	NA	NA	NA	NA	NA	NA	NA	NA	Abcc1,Alox5,Dpep2,Lta4h,Ltc4s,Ptges3,Ptgis,Tbxas1	NA
MSigDB Pathway	Genes involved in Regulation of beta-cell development	0						2.54847e-44						Akt1,Akt3,Foxo1,Gm15427,Hnf1b,Hnf4a,Notch1,Onecut3,Pdx1,Pklr,Rpl10,Rpl11,Rpl13,Rpl14,Rpl17,Rpl19,Rpl22,Rpl23,Rpl26,Rpl27,Rpl27a,Rpl28,Rpl29,Rpl32,Rpl35,Rpl35a,Rpl36,Rpl37a,Rpl38,Rpl4,Rpl41,Rpl6,Rpl9,Rplp0,Rps10,Rps11,Rps12,Rps14,Rps16,Rps17,Rps18,Rps19,Rps20,Rps21,Rps26,Rps27,Rps27a,Rps28,Rps6,Rps7,Rps8,Rps9,Rpsa,Uba52	NA	NA	NA	NA	NA	Rpl10a,Rpl12,Rpl22,Rpl3,Rpl41,Rps19,Rps26,Rps5,Rps7,Ubc	NA	NA	NA	NA	NA
MSigDB Pathway	Genes involved in Regulation of gene expression in beta cells	0						8.38496e-45						Akt1,Akt3,Foxo1,Gm15427,Hnf4a,Pdx1,Pklr,Rpl10,Rpl11,Rpl13,Rpl14,Rpl17,Rpl19,Rpl22,Rpl23,Rpl26,Rpl27,Rpl27a,Rpl28,Rpl29,Rpl32,Rpl35,Rpl35a,Rpl36,Rpl37a,Rpl38,Rpl4,Rpl41,Rpl6,Rpl9,Rplp0,Rps10,Rps11,Rps12,Rps14,Rps16,Rps17,Rps18,Rps19,Rps20,Rps21,Rps26,Rps27,Rps27a,Rps28,Rps6,Rps7,Rps8,Rps9,Rpsa,Uba52	NA	NA	NA	NA	NA	Rpl10a,Rpl12,Rpl22,Rpl3,Rpl41,Rps19,Rps26,Rps5,Rps7,Ubc	NA	NA	NA	NA	NA
MSigDB Pathway	Genes involved in RNA Polymerase I Promoter Opening	0	0	4.23058e-204			9.78768e-181	0		7.60748e-103		1.71492e-252		H2afb1,H2afx,H3f3a,Hist1h2ab,Hist1h2ac,Hist1h2ae,Hist1h2ai,Hist1h2ak,Hist1h2an,Hist1h2ap,Hist1h2bb,Hist1h2bc,Hist1h2be,Hist1h2bf,Hist1h2bg,Hist1h2bh,Hist1h2bl,Hist1h2bm,Hist1h2bn,Hist1h3a,Hist1h3b,Hist1h3c,Hist1h3d,Hist1h3e,Hist1h3f,Hist1h3g,Hist1h3h,Hist1h3i,Hist1h4a,Hist1h4b,Hist1h4c,Hist1h4d,Hist1h4f,Hist1h4h,Hist1h4j,Hist1h4k,Hist2h2ac,Hist2h2be,Mbd2	H2afx,Hist1h2ab,Hist1h2ac,Hist1h2ae,Hist1h2ag,Hist1h2ai,Hist1h2ak,Hist1h2an,Hist1h2ap,Hist1h2bb,Hist1h2bc,Hist1h2be,Hist1h2bf,Hist1h2bg,Hist1h2bh,Hist1h2bj,Hist1h2bk,Hist1h2bl,Hist1h2bm,Hist1h2bn,Hist1h3a,Hist1h3b,Hist1h3c,Hist1h3d,Hist1h3e,Hist1h3f,Hist1h3g,Hist1h3h,Hist1h3i,Hist1h4a,Hist1h4b,Hist1h4c,Hist1h4d,Hist1h4f,Hist1h4h,Hist1h4i,Hist1h4j,Hist1h4k,Hist2h2ac,Hist2h2be	H3f3a,Hist1h2ab,Hist1h2ac,Hist1h2ae,Hist1h2ai,Hist1h2ak,Hist1h2an,Hist1h2ap,Hist1h2bb,Hist1h2bc,Hist1h2be,Hist1h2bf,Hist1h2bg,Hist1h2bh,Hist1h2bl,Hist1h2bm,Hist1h2bn,Hist1h3a,Hist1h3b,Hist1h3c,Hist1h3d,Hist1h3e,Hist1h3f,Hist1h3g,Hist1h3h,Hist1h3i,Hist1h4a,Hist1h4b,Hist1h4c,Hist1h4d,Hist1h4f,Hist1h4h,Hist1h4j,Hist1h4k,Mbd2	NA	NA	H2afb1,H3f3a,Hist1h2ab,Hist1h2ac,Hist1h2ae,Hist1h2ag,Hist1h2ai,Hist1h2ak,Hist1h2an,Hist1h2ap,Hist1h2bb,Hist1h2bc,Hist1h2be,Hist1h2bf,Hist1h2bg,Hist1h2bh,Hist1h2bj,Hist1h2bk,Hist1h2bl,Hist1h2bm,Hist1h2bn,Hist1h3a,Hist1h3b,Hist1h3c,Hist1h3d,Hist1h3e,Hist1h3f,Hist1h3g,Hist1h3h,Hist1h3i,Hist1h4a,Hist1h4b,Hist1h4c,Hist1h4d,Hist1h4f,Hist1h4h,Hist1h4i,Hist1h4j,Hist1h4k	H2afx,H3f3a,H3f3b,Hist1h2ab,Hist1h2ac,Hist1h2ae,Hist1h2ag,Hist1h2ai,Hist1h2ak,Hist1h2an,Hist1h2ap,Hist1h2bb,Hist1h2bc,Hist1h2be,Hist1h2bf,Hist1h2bg,Hist1h2bh,Hist1h2bj,Hist1h2bk,Hist1h2bl,Hist1h2bm,Hist1h2bn,Hist1h3a,Hist1h3b,Hist1h3c,Hist1h3d,Hist1h3e,Hist1h3f,Hist1h3g,Hist1h3h,Hist1h3i,Hist1h4a,Hist1h4b,Hist1h4c,Hist1h4d,Hist1h4f,Hist1h4h,Hist1h4i,Hist1h4j,Hist1h4k	NA	Hist1h2ab,Hist1h2ac,Hist1h2ae,Hist1h2bb,Hist1h2bc,Hist1h2be,Hist1h2bf,Hist1h2bg,Hist1h2bh,Hist1h3a,Hist1h3b,Hist1h3c,Hist1h3d,Hist1h3e,Hist1h3f,Hist1h3g,Hist1h4a,Hist1h4b,Hist1h4c,Hist1h4d,Hist1h4f,Hist1h4h	NA	H2afx,H3f3a,Hist1h2ab,Hist1h2ac,Hist1h2ae,Hist1h2bb,Hist1h2bc,Hist1h2be,Hist1h2bf,Hist1h2bg,Hist1h2bh,Hist1h3a,Hist1h3b,Hist1h3c,Hist1h3d,Hist1h3e,Hist1h3f,Hist1h3g,Hist1h4a,Hist1h4b,Hist1h4c,Hist1h4d,Hist1h4f,Hist1h4h,Hist2h2ac,Hist2h2be,Mbd2	NA
MSigDB Pathway	Genes involved in RNA Polymerase I, RNA Polymerase III, and Mitochondrial Transcription	0	0	3.58409053331324e-318			1.09895e-205	0		1.53151e-114		0		Bdp1,Brf2,Gtf2h3,Gtf2h4,Gtf3c1,Gtf3c2,H2afb1,H2afx,H3f3a,Hist1h2ab,Hist1h2ac,Hist1h2ae,Hist1h2ai,Hist1h2ak,Hist1h2an,Hist1h2ap,Hist1h2bb,Hist1h2bc,Hist1h2be,Hist1h2bf,Hist1h2bg,Hist1h2bh,Hist1h2bl,Hist1h2bm,Hist1h2bn,Hist1h3a,Hist1h3b,Hist1h3c,Hist1h3d,Hist1h3e,Hist1h3f,Hist1h3g,Hist1h3h,Hist1h3i,Hist1h4a,Hist1h4b,Hist1h4c,Hist1h4d,Hist1h4f,Hist1h4h,Hist1h4j,Hist1h4k,Hist2h2ac,Hist2h2be,Mbd2,Nfib…	H2afx,Hist1h2ab,Hist1h2ac,Hist1h2ae,Hist1h2ag,Hist1h2ai,Hist1h2ak,Hist1h2an,Hist1h2ap,Hist1h2bb,Hist1h2bc,Hist1h2be,Hist1h2bf,Hist1h2bg,Hist1h2bh,Hist1h2bj,Hist1h2bk,Hist1h2bl,Hist1h2bm,Hist1h2bn,Hist1h3a,Hist1h3b,Hist1h3c,Hist1h3d,Hist1h3e,Hist1h3f,Hist1h3g,Hist1h3h,Hist1h3i,Hist1h4a,Hist1h4b,Hist1h4c,Hist1h4d,Hist1h4f,Hist1h4h,Hist1h4i,Hist1h4j,Hist1h4k,Hist2h2ac,Hist2h2be,Polr2e,Snapc4	Brf2,Cdk7,Gtf3c2,Gtf3c4,H3f3a,Hist1h2ab,Hist1h2ac,Hist1h2ae,Hist1h2ai,Hist1h2ak,Hist1h2an,Hist1h2ap,Hist1h2bb,Hist1h2bc,Hist1h2be,Hist1h2bf,Hist1h2bg,Hist1h2bh,Hist1h2bl,Hist1h2bm,Hist1h2bn,Hist1h3a,Hist1h3b,Hist1h3c,Hist1h3d,Hist1h3e,Hist1h3f,Hist1h3g,Hist1h3h,Hist1h3i,Hist1h4a,Hist1h4b,Hist1h4c,Hist1h4d,Hist1h4f,Hist1h4h,Hist1h4j,Hist1h4k,Kat2b,Lzts1,Mbd2,Mnat1,Polr1c,Polr1d,Polr3b,Polr3e,Polr3…	NA	NA	Cdk7,Ercc6,Gtf2h1,Gtf3c2,H2afb1,H3f3a,Hist1h2ab,Hist1h2ac,Hist1h2ae,Hist1h2ag,Hist1h2ai,Hist1h2ak,Hist1h2an,Hist1h2ap,Hist1h2bb,Hist1h2bc,Hist1h2be,Hist1h2bf,Hist1h2bg,Hist1h2bh,Hist1h2bj,Hist1h2bk,Hist1h2bl,Hist1h2bm,Hist1h2bn,Hist1h3a,Hist1h3b,Hist1h3c,Hist1h3d,Hist1h3e,Hist1h3f,Hist1h3g,Hist1h3h,Hist1h3i,Hist1h4a,Hist1h4b,Hist1h4c,Hist1h4d,Hist1h4f,Hist1h4h,Hist1h4i,Hist1h4j,Hist1h4k,Polr3h,Pt…	H2afx,H3f3a,H3f3b,Hist1h2ab,Hist1h2ac,Hist1h2ae,Hist1h2ag,Hist1h2ai,Hist1h2ak,Hist1h2an,Hist1h2ap,Hist1h2bb,Hist1h2bc,Hist1h2be,Hist1h2bf,Hist1h2bg,Hist1h2bh,Hist1h2bj,Hist1h2bk,Hist1h2bl,Hist1h2bm,Hist1h2bn,Hist1h3a,Hist1h3b,Hist1h3c,Hist1h3d,Hist1h3e,Hist1h3f,Hist1h3g,Hist1h3h,Hist1h3i,Hist1h4a,Hist1h4b,Hist1h4c,Hist1h4d,Hist1h4f,Hist1h4h,Hist1h4i,Hist1h4j,Hist1h4k	NA	Cdk7,Gtf3c5,Hist1h2ab,Hist1h2ac,Hist1h2ae,Hist1h2bb,Hist1h2bc,Hist1h2be,Hist1h2bf,Hist1h2bg,Hist1h2bh,Hist1h3a,Hist1h3b,Hist1h3c,Hist1h3d,Hist1h3e,Hist1h3f,Hist1h3g,Hist1h4a,Hist1h4b,Hist1h4c,Hist1h4d,Hist1h4f,Hist1h4h,Polr3b	NA	Brf1,Brf2,Cdk7,Gtf2h1,Gtf2h2,Gtf3c4,Gtf3c5,H2afx,H3f3a,Hist1h2ab,Hist1h2ac,Hist1h2ae,Hist1h2bb,Hist1h2bc,Hist1h2be,Hist1h2bf,Hist1h2bg,Hist1h2bh,Hist1h3a,Hist1h3b,Hist1h3c,Hist1h3d,Hist1h3e,Hist1h3f,Hist1h3g,Hist1h4a,Hist1h4b,Hist1h4c,Hist1h4d,Hist1h4f,Hist1h4h,Hist2h2ac,Hist2h2be,Kat2b,Lzts1,Mbd2,Mnat1,Nfix,Polr1d,Polr3b,Polr3e,Polr3h,Pou2f1,Ptrf,Taf1c	NA
MSigDB Pathway	Genes involved in RNA PolymerasePromoter Clearance	0	0	7.75071e-254			2.4115e-189	0		2.39717e-104		3.98078e-305		Gtf2h3,Gtf2h4,H2afb1,H2afx,H3f3a,Hist1h2ab,Hist1h2ac,Hist1h2ae,Hist1h2ai,Hist1h2ak,Hist1h2an,Hist1h2ap,Hist1h2bb,Hist1h2bc,Hist1h2be,Hist1h2bf,Hist1h2bg,Hist1h2bh,Hist1h2bl,Hist1h2bm,Hist1h2bn,Hist1h3a,Hist1h3b,Hist1h3c,Hist1h3d,Hist1h3e,Hist1h3f,Hist1h3g,Hist1h3h,Hist1h3i,Hist1h4a,Hist1h4b,Hist1h4c,Hist1h4d,Hist1h4f,Hist1h4h,Hist1h4j,Hist1h4k,Hist2h2ac,Hist2h2be,Mbd2,Polr1c,Polr1d	H2afx,Hist1h2ab,Hist1h2ac,Hist1h2ae,Hist1h2ag,Hist1h2ai,Hist1h2ak,Hist1h2an,Hist1h2ap,Hist1h2bb,Hist1h2bc,Hist1h2be,Hist1h2bf,Hist1h2bg,Hist1h2bh,Hist1h2bj,Hist1h2bk,Hist1h2bl,Hist1h2bm,Hist1h2bn,Hist1h3a,Hist1h3b,Hist1h3c,Hist1h3d,Hist1h3e,Hist1h3f,Hist1h3g,Hist1h3h,Hist1h3i,Hist1h4a,Hist1h4b,Hist1h4c,Hist1h4d,Hist1h4f,Hist1h4h,Hist1h4i,Hist1h4j,Hist1h4k,Hist2h2ac,Hist2h2be	Cdk7,H3f3a,Hist1h2ab,Hist1h2ac,Hist1h2ae,Hist1h2ai,Hist1h2ak,Hist1h2an,Hist1h2ap,Hist1h2bb,Hist1h2bc,Hist1h2be,Hist1h2bf,Hist1h2bg,Hist1h2bh,Hist1h2bl,Hist1h2bm,Hist1h2bn,Hist1h3a,Hist1h3b,Hist1h3c,Hist1h3d,Hist1h3e,Hist1h3f,Hist1h3g,Hist1h3h,Hist1h3i,Hist1h4a,Hist1h4b,Hist1h4c,Hist1h4d,Hist1h4f,Hist1h4h,Hist1h4j,Hist1h4k,Kat2b,Mbd2,Mnat1,Polr1c,Polr1d,Taf1c	NA	NA	Cdk7,Ercc6,Gtf2h1,H2afb1,H3f3a,Hist1h2ab,Hist1h2ac,Hist1h2ae,Hist1h2ag,Hist1h2ai,Hist1h2ak,Hist1h2an,Hist1h2ap,Hist1h2bb,Hist1h2bc,Hist1h2be,Hist1h2bf,Hist1h2bg,Hist1h2bh,Hist1h2bj,Hist1h2bk,Hist1h2bl,Hist1h2bm,Hist1h2bn,Hist1h3a,Hist1h3b,Hist1h3c,Hist1h3d,Hist1h3e,Hist1h3f,Hist1h3g,Hist1h3h,Hist1h3i,Hist1h4a,Hist1h4b,Hist1h4c,Hist1h4d,Hist1h4f,Hist1h4h,Hist1h4i,Hist1h4j,Hist1h4k	H2afx,H3f3a,H3f3b,Hist1h2ab,Hist1h2ac,Hist1h2ae,Hist1h2ag,Hist1h2ai,Hist1h2ak,Hist1h2an,Hist1h2ap,Hist1h2bb,Hist1h2bc,Hist1h2be,Hist1h2bf,Hist1h2bg,Hist1h2bh,Hist1h2bj,Hist1h2bk,Hist1h2bl,Hist1h2bm,Hist1h2bn,Hist1h3a,Hist1h3b,Hist1h3c,Hist1h3d,Hist1h3e,Hist1h3f,Hist1h3g,Hist1h3h,Hist1h3i,Hist1h4a,Hist1h4b,Hist1h4c,Hist1h4d,Hist1h4f,Hist1h4h,Hist1h4i,Hist1h4j,Hist1h4k	NA	Cdk7,Hist1h2ab,Hist1h2ac,Hist1h2ae,Hist1h2bb,Hist1h2bc,Hist1h2be,Hist1h2bf,Hist1h2bg,Hist1h2bh,Hist1h3a,Hist1h3b,Hist1h3c,Hist1h3d,Hist1h3e,Hist1h3f,Hist1h3g,Hist1h4a,Hist1h4b,Hist1h4c,Hist1h4d,Hist1h4f,Hist1h4h	NA	Cdk7,Gtf2h1,Gtf2h2,H2afx,H3f3a,Hist1h2ab,Hist1h2ac,Hist1h2ae,Hist1h2bb,Hist1h2bc,Hist1h2be,Hist1h2bf,Hist1h2bg,Hist1h2bh,Hist1h3a,Hist1h3b,Hist1h3c,Hist1h3d,Hist1h3e,Hist1h3f,Hist1h3g,Hist1h4a,Hist1h4b,Hist1h4c,Hist1h4d,Hist1h4f,Hist1h4h,Hist2h2ac,Hist2h2be,Kat2b,Mbd2,Mnat1,Polr1d,Taf1c	NA
MSigDB Pathway	Genes involved in Signaling in Immune system	0												1300017J02Rik,Akt1,Akt3,Atp1b2,Atp1b3,B2m,Bcl10,Bsg,C1s,C2,C4b,C8g,Cd19,Cd244,Cd247,Cd28,Cd34,Cd3d,Cd3e,Cd3g,Cd48,Cd80,Cd81,Cd84,Cfb,Chuk,Creb1,Dok2,Dusp4,Dusp6,Dusp7,Enah,Esam,F11r,Fcer1g,Fcgr2b,Fcgr4,Fos,Gp49a,Grap2,Grb2,Hc,Hcst,Icam1,Icam4,Icam5,Ifitm1,Ikbke,Inpp5d,Itga3,Itgam,Itgav,Itgb7,Klrc1,Lat,Lilrb3,Lilrb4,Lyn,Mag,Map2k3,Map2k7,Map3k1,Mapk14,Mapkapk2,Masp2,Mbl2,Mef2a,Mlst8,Myd88,Nfkbia,P…	NA	NA	NA	NA	NA	NA	NA	NA	NA	NA	NA
MSigDB Pathway	Genes involved in Telomere Maintenance	0	0	8.5868e-221			8.93309e-146	0		7.20465e-90		5.76707e-277		Acd,H2afb1,H2afx,Hist1h2ab,Hist1h2ac,Hist1h2ae,Hist1h2ai,Hist1h2ak,Hist1h2an,Hist1h2ap,Hist1h2bb,Hist1h2bc,Hist1h2be,Hist1h2bf,Hist1h2bg,Hist1h2bh,Hist1h2bl,Hist1h2bm,Hist1h2bn,Hist1h3d,Hist1h4a,Hist1h4b,Hist1h4c,Hist1h4d,Hist1h4f,Hist1h4h,Hist1h4j,Hist1h4k,Hist2h2ac,Hist2h2be,Pcna,Pold3,Pold4,Pole,Pole2,Prim1,Rfc2,Rfc4,Rpa2,Ruvbl2,Tert,Wrap53	H2afx,Hist1h2ab,Hist1h2ac,Hist1h2ae,Hist1h2ag,Hist1h2ai,Hist1h2ak,Hist1h2an,Hist1h2ap,Hist1h2bb,Hist1h2bc,Hist1h2be,Hist1h2bf,Hist1h2bg,Hist1h2bh,Hist1h2bj,Hist1h2bk,Hist1h2bl,Hist1h2bm,Hist1h2bn,Hist1h3d,Hist1h4a,Hist1h4b,Hist1h4c,Hist1h4d,Hist1h4f,Hist1h4h,Hist1h4i,Hist1h4j,Hist1h4k,Hist2h2ac,Hist2h2be,Terf2ip	Acd,Dkc1,Fen1,Hist1h2ab,Hist1h2ac,Hist1h2ae,Hist1h2ai,Hist1h2ak,Hist1h2an,Hist1h2ap,Hist1h2bb,Hist1h2bc,Hist1h2be,Hist1h2bf,Hist1h2bg,Hist1h2bh,Hist1h2bl,Hist1h2bm,Hist1h2bn,Hist1h3d,Hist1h4a,Hist1h4b,Hist1h4c,Hist1h4d,Hist1h4f,Hist1h4h,Hist1h4j,Hist1h4k,Pola1,Pola2,Pole,Prim2,Rfc2,Wrap53	NA	NA	H2afb1,Hist1h2ab,Hist1h2ac,Hist1h2ae,Hist1h2ag,Hist1h2ai,Hist1h2ak,Hist1h2an,Hist1h2ap,Hist1h2bb,Hist1h2bc,Hist1h2be,Hist1h2bf,Hist1h2bg,Hist1h2bh,Hist1h2bj,Hist1h2bk,Hist1h2bl,Hist1h2bm,Hist1h2bn,Hist1h3d,Hist1h4a,Hist1h4b,Hist1h4c,Hist1h4d,Hist1h4f,Hist1h4h,Hist1h4i,Hist1h4j,Hist1h4k,Pole,Pole2,Terf2ip	H2afx,Hist1h2ab,Hist1h2ac,Hist1h2ae,Hist1h2ag,Hist1h2ai,Hist1h2ak,Hist1h2an,Hist1h2ap,Hist1h2bb,Hist1h2bc,Hist1h2be,Hist1h2bf,Hist1h2bg,Hist1h2bh,Hist1h2bj,Hist1h2bk,Hist1h2bl,Hist1h2bm,Hist1h2bn,Hist1h3d,Hist1h4a,Hist1h4b,Hist1h4c,Hist1h4d,Hist1h4f,Hist1h4h,Hist1h4i,Hist1h4j,Hist1h4k	NA	Fen1,Hist1h2ab,Hist1h2ac,Hist1h2ae,Hist1h2bb,Hist1h2bc,Hist1h2be,Hist1h2bf,Hist1h2bg,Hist1h2bh,Hist1h3d,Hist1h4a,Hist1h4b,Hist1h4c,Hist1h4d,Hist1h4f,Hist1h4h,Pola1,Rfc2,Wrap53	NA	Acd,Dkc1,H2afx,Hist1h2ab,Hist1h2ac,Hist1h2ae,Hist1h2bb,Hist1h2bc,Hist1h2be,Hist1h2bf,Hist1h2bg,Hist1h2bh,Hist1h3d,Hist1h4a,Hist1h4b,Hist1h4c,Hist1h4d,Hist1h4f,Hist1h4h,Hist2h2ac,Hist2h2be,Pola1,Pola2,Pold1,Pold3,Prim1,Prim2,Rpa2,Rpa3,Ruvbl2,Terf2ip	NA
[truncated: 728 more rows]
