# Supplementary material for: Dynamic shifts in occupancy by TAL1 are guided by GATA factors and drive large-scale reprogramming of gene expression during hematopoiesis
Source: Genome Res. 2014 Dec;24(12):1945–62. doi: 10.1101/gr.164830.113 (PMC4248312; doi:10.1101/gr.164830.113)
Supplement: Supplemental Material [file supp_gr.164830.113_Supplemental_Table2.xlsx]

## Sheet: byProximity_selectedgreatfuncti
		Cell type distribution for TAL1 occupancy
	HPC	+	-	-	-	-	-	+	+	-	+
	Epro	-	+	-	-	-	-	+	-	+	+
	G1E	-	-	+	-	-	-	-	-	+	+
	ER4	-	-	-	+	-	-	-	-	+	+
	Ebl	-	-	-	-	+	-	-	-	+	+
	MEG	-	-	-	-	-	+	-	+	-	+	MISC
Category	Term	BinomFdrQ											Genes
BioCyc Pathway	aerobic respiration -- electron donor II	3.60424e-148											Cox5a,Cox5b,Cox7c,Ndufa10,Ndufa11,Ndufa12,Ndufa6,Ndufa7,Ndufa9,Ndufaf1,Ndufaf2,Ndufaf3,Ndufb10,Ndufb2,Ndufb3,Ndufb6,Ndufb7,Ndufb8,Ndufb9,Ndufc1,Ndufs1,Ndufs2,Ndufs3,Ndufs7,Ndufs8,Ndufv2,Ndufv3,Sdha,Sdhc,Sdhd,Uqcr10,Uqcr11,Uqcrb,Uqcrh,Uqcrq	NA	NA	NA	NA	NA	NA	NA	NA	NA	NA
GO Biological Process	biosynthetic process	0											0610031J06Rik,1110002N22Rik,1110034A24Rik,1600027N09Rik,1810035L17Rik,2010111I01Rik,2310030N02Rik,2410022L05Rik,2810006K23Rik,2810422J05Rik,4933416C03Rik,6030422M02Rik,A4galt,AU015228,Aars,Aars2,Aarsd1,Abcf1,Abt1,Acadm,Acan,Accs,Accsl,Acer2,Acer3,Acly,Actr8,Ada,Adcy10,Adcy2,Adh1,Adi1,Adnp,Adss,Aes,Aff3,Agpat2,Agpat4,Agpat5,Agpat9,Ahrr,Aimp2,Ak3,Akirin2,Akna,Alas1,Aldh1a1,Aldh1l2,Aldh9a1,Alg1,Alox…	NA	NA	NA	NA	NA	NA	NA	NA	NA	NA
GO Biological Process	cellular biosynthetic process	0											0610031J06Rik,1110002N22Rik,1110034A24Rik,1600027N09Rik,1810035L17Rik,2010111I01Rik,2410022L05Rik,2810006K23Rik,2810422J05Rik,4933416C03Rik,6030422M02Rik,AU015228,Aars,Aars2,Aarsd1,Abcf1,Abt1,Acadm,Acan,Accs,Accsl,Acer2,Acer3,Acly,Actr8,Ada,Adcy10,Adcy2,Adh1,Adi1,Adnp,Adss,Aes,Aff3,Agpat2,Agpat4,Agpat5,Agpat9,Ahrr,Aimp2,Ak3,Akirin2,Akna,Alas1,Aldh1a1,Aldh9a1,Alox12,Amd2,Ang,Apip,Apoa2,Aprt,Arid1a…	NA	NA	NA	NA	NA	NA	NA	NA	NA	NA
GO Biological Process	cellular macromolecule biosynthetic process	0											0610031J06Rik,1110002N22Rik,1110034A24Rik,1600027N09Rik,1810035L17Rik,2410022L05Rik,2810006K23Rik,2810422J05Rik,4933416C03Rik,6030422M02Rik,AU015228,Aars,Aars2,Aarsd1,Abcf1,Abt1,Acadm,Acan,Actr8,Adnp,Aes,Aff3,Ahrr,Aimp2,Akirin2,Akna,Ang,Arid1a,Arid5a,Arrb2,Ascl3,Ash1l,Asxl3,Atad2,Atf1,Atf2,Atf4,Atf7,Atoh7,Atp7a,Atxn7,Atxn7l3,B3galt4,B3galt6,B3gnt7,B3gnt9-ps,Barx2,Baz1a,Bcl3,Bcl6,Bcl9l,Bdp1,Bhlhe4…	NA	NA	NA	NA	NA	NA	NA	NA	NA	NA
GO Biological Process	cellular macromolecule metabolic process	0						0					0610007P08Rik,0610031J06Rik,1110002N22Rik,1110008L16Rik,1110034A24Rik,1190005F20Rik,1600027N09Rik,1810035L17Rik,1810074P20Rik,2310079F23Rik,2410022L05Rik,2510012J08Rik,2810006K23Rik,2810422J05Rik,2810422O20Rik,4932415M13Rik,4933416C03Rik,5430437P03Rik,6030422M02Rik,6330577E15Rik,A830007P12Rik,AU015228,AU041133,Aars,Aars2,Aarsd1,Abcf1,Abl2,Abt1,Acadm,Acan,Acin1,Acr,Actr8,Acvr1,Acvr1b,Acvr1c,Adam10…	NA	NA	NA	NA	NA	2500003M10Rik,Acvrl1,Aicda,Aimp1,Apobec1,Banp,Bclaf1,Brdt,Btg1,Bzw1,Ccnl1,Cdk12,Cdk13,Cenpv,Cirbp,Cited2,Cltc,Cul5,Ddit3,Ddx5,Dnajb1,Dusp1,Eef1a1,Eef1e1,Ehmt1,Eif4g2,Eif5,Eprs,Fbxw7,Fubp1,Gadd45g,Gata2,Gmeb1,Gtf2f1,H2afx,H3f3a,H3f3b,Hist1h1t,Hist1h2ah,Hist1h2ai,Hist1h2bh,Hist1h3a,Hist1h3e,Hist1h3f,Hist1h4c,Hist1h4d,Hist1h4h,Hist1h4i,Hist1h4k,Hnrnpa2b1,Hnrnpab,Hsp90aa1,Hspa5,Ints6,Jmjd6,Jun,Jund,K…	NA	NA	NA	NA
GO Biological Process	cellular metabolic process	0											0610007P08Rik,0610031J06Rik,1110002N22Rik,1110008L16Rik,1110034A24Rik,1190003J15Rik,1190005F20Rik,1600027N09Rik,1810014F10Rik,1810035L17Rik,1810074P20Rik,2010111I01Rik,2310079F23Rik,2410022L05Rik,2510012J08Rik,2810006K23Rik,2810422J05Rik,2810422O20Rik,4932415M13Rik,4933416C03Rik,5133401N09Rik,5430437P03Rik,6030422M02Rik,6330577E15Rik,6530401N04Rik,9430031J16Rik,A530098C11Rik,A830007P12Rik,AI46249…	NA	NA	NA	NA	NA	NA	NA	NA	NA	NA
GO Biological Process	cellular nitrogen compound metabolic process	0						0					0610007P08Rik,0610031J06Rik,1110002N22Rik,1110008L16Rik,1190003J15Rik,1190005F20Rik,1600027N09Rik,1810035L17Rik,2310079F23Rik,2410022L05Rik,2510012J08Rik,4933416C03Rik,5430437P03Rik,6030422M02Rik,6330577E15Rik,6530401N04Rik,AU015228,AU041133,Aars,Aars2,Aarsd1,Abcb7,Abcb8,Abcc10,Abcc2,Abcc3,Abcd3,Abce1,Abcf1,Abcf2,Abt1,Acadl,Acadm,Accs,Accsl,Acer2,Acer3,Acin1,Actr8,Acy1,Ada,Adcy10,Adcy2,Adi1,Adnp,…	NA	NA	NA	NA	NA	2500003M10Rik,Aicda,Apobec1,Arl4a,Azin1,Banp,Bclaf1,Brdt,Bzw1,Ccnl1,Cdk12,Cdk13,Cenpv,Cirbp,Cited2,Ddah2,Ddit3,Ddx5,Eef1a1,Eef1e1,Ehmt1,Eif4g2,Eif5,Eprs,Ftcd,Fubp1,Gata2,Gmeb1,Gtf2f1,H2afx,H3f3a,H3f3b,Hist1h1t,Hist1h2ah,Hist1h2ai,Hist1h2bh,Hist1h3a,Hist1h3e,Hist1h3f,Hist1h4c,Hist1h4d,Hist1h4h,Hist1h4i,Hist1h4k,Hnrnpa2b1,Hnrnpab,Hsp90aa1,Ints6,Jmjd6,Jun,Jund,Klf10,Klf7,Mat2a,Med1,Mnt,Ncapd2,Nhp2,O…	NA	NA	NA	NA
GO Biological Process	cellular process	0											0610007P08Rik,0610009O20Rik,0610031J06Rik,1100001G20Rik,1110002N22Rik,1110008J03Rik,1110008L16Rik,1110021L09Rik,1110034A24Rik,1190003J15Rik,1190005F20Rik,1600027N09Rik,1700019N12Rik,1700123K08Rik,1700123L14Rik,1810014F10Rik,1810035L17Rik,1810074P20Rik,2010111I01Rik,2310016C08Rik,2310079F23Rik,2400001E08Rik,2400003C14Rik,2410022L05Rik,2410091C18Rik,2510003E04Rik,2510012J08Rik,2610301G19Rik,2810002…	NA	NA	NA	NA	NA	NA	NA	NA	NA	NA
GO Biological Process	cellular protein metabolic process	0											1110034A24Rik,1810074P20Rik,2410022L05Rik,2810006K23Rik,2810422J05Rik,2810422O20Rik,4932415M13Rik,5430437P03Rik,A830007P12Rik,Aars,Aars2,Aarsd1,Abcf1,Abl2,Acr,Acvr1,Acvr1b,Acvr1c,Adam10,Adam9,Adh5,Adnp,Adprh,Adprhl1,Adrbk1,Adrbk2,Aimp2,Aipl1,Akt3,Alk,Anapc10,Anapc11,Anapc13,Anapc4,Anapc5,Anapc7,Anxa1,Apoa2,Araf,Arih1,Arrb2,Ash1l,Asl,Asph,Asphd2,Atp7a,Aurkb,Aurkc,Axin1,B2m,B3galt4,B3galt6,B3gnt7,B…	NA	NA	NA	NA	NA	NA	NA	NA	NA	NA
GO Biological Process	gene expression	0						9.11106e-283					0610031J06Rik,1110002N22Rik,1110008L16Rik,1110034A24Rik,1190005F20Rik,1600027N09Rik,1810035L17Rik,2310079F23Rik,2410022L05Rik,2510012J08Rik,2810006K23Rik,2810422J05Rik,4933416C03Rik,AU015228,Aars,Aars2,Aarsd1,Abcf1,Abt1,Actr8,Adamts3,Adnp,Aes,Aff2,Aff3,Ahcyl1,Ahrr,Aimp2,Akirin2,Akna,Ang,Apobec4,Aqr,Arid1a,Arid5a,Arrb2,Ascl3,Ash1l,Asxl3,Atad2,Atf1,Atf2,Atf4,Atf7,Atoh7,Atxn7,Atxn7l3,Barx2,Bat1a,Baz…	NA	NA	NA	NA	NA	2500003M10Rik,Aicda,Aimp1,Apobec1,Banp,Bclaf1,Brdt,Bzw1,Ccnl1,Cdk12,Cdk13,Cited2,Ddit3,Ddx5,Eef1a1,Eef1e1,Eif4g2,Eif5,Eprs,Fubp1,Gata2,Gmeb1,Gtf2f1,Hnrnpa2b1,Hnrnpab,Ints6,Jmjd6,Jun,Jund,Klf10,Klf7,Med1,Mnt,Mrpl51,Nhp2,Pcsk6,Phf19,Polg2,Polr2a,Ptbp1,Raly,Rb1cc1,Rpl10a,Rpl12,Rpl3,Rps19,Rps5,Rps7,Sertad1,Sertad3,Sfpq,Smyd2,Srsf2,Srsf3,Tsc22d1,Txnl4a,Zfhx3,Zfp110,Zfp329,Zik1,Zscan18,Zscan22,Zscan4b,…	NA	NA	NA	NA
GO Biological Process	macromolecule biosynthetic process	0											0610031J06Rik,1110002N22Rik,1110034A24Rik,1600027N09Rik,1810035L17Rik,2410022L05Rik,2810006K23Rik,2810422J05Rik,4933416C03Rik,6030422M02Rik,AU015228,Aars,Aars2,Aarsd1,Abcf1,Abt1,Acadm,Acan,Actr8,Adnp,Aes,Aff3,Ahrr,Aimp2,Akirin2,Akna,Ang,Arid1a,Arid5a,Arrb2,Ascl3,Ash1l,Asxl3,Atad2,Atf1,Atf2,Atf4,Atf7,Atoh7,Atp7a,Atxn7,Atxn7l3,B3galt4,B3galt6,B3gnt7,B3gnt9-ps,B4galt7,Barx2,Baz1a,Bcl3,Bcl6,Bcl9l,Bdp…	NA	NA	NA	NA	NA	NA	NA	NA	NA	NA
GO Biological Process	macromolecule metabolic process	0						0					0610007P08Rik,0610031J06Rik,1110002N22Rik,1110008L16Rik,1110034A24Rik,1190005F20Rik,1600027N09Rik,1700074P13Rik,1810009J06Rik,1810035L17Rik,1810074P20Rik,2010111I01Rik,2310079F23Rik,2410022L05Rik,2510012J08Rik,2810006K23Rik,2810422J05Rik,2810422O20Rik,4932415M13Rik,4933416C03Rik,5430437P03Rik,6030422M02Rik,6330577E15Rik,9530003J23Rik,9930032O22Rik,A830007P12Rik,AF366264,AU015228,AU041133,Aars,Aar…	NA	NA	NA	NA	NA	2500003M10Rik,Acvrl1,Adamts18,Aicda,Aimp1,Apobec1,Banp,Bclaf1,Brdt,Btg1,Bzw1,Cat,Ccnl1,Cdk12,Cdk13,Cenpv,Cirbp,Cited2,Cltc,Cul5,Ddit3,Ddx5,Dnajb1,Dusp1,Eef1a1,Eef1e1,Ehmt1,Eif4g2,Eif5,Eprs,Fbxw7,Fubp1,Gadd45g,Gata2,Gmeb1,Gtf2f1,H2afx,H3f3a,H3f3b,Hist1h1t,Hist1h2ah,Hist1h2ai,Hist1h2bh,Hist1h3a,Hist1h3e,Hist1h3f,Hist1h4c,Hist1h4d,Hist1h4h,Hist1h4i,Hist1h4k,Hnrnpa2b1,Hnrnpab,Hsp90aa1,Hspa5,Ints6,Jmj…	NA	NA	NA	NA
GO Biological Process	metabolic process	0											0610007P08Rik,0610031J06Rik,1110002N22Rik,1110008L16Rik,1110034A24Rik,1190003J15Rik,1190005F20Rik,1600015I10Rik,1600027N09Rik,1700074P13Rik,1810009J06Rik,1810014F10Rik,1810022C23Rik,1810035L17Rik,1810074P20Rik,2010111I01Rik,2310030N02Rik,2310079F23Rik,2410022L05Rik,2510012J08Rik,2810006K23Rik,2810422J05Rik,2810422O20Rik,4930402F06Rik,4930568D16Rik,4931429L15Rik,4932415M13Rik,4933406M09Rik,4933416…	NA	NA	NA	NA	NA	NA	NA	NA	NA	NA
GO Biological Process	nitrogen compound metabolic process	0						0					0610007P08Rik,0610031J06Rik,1110002N22Rik,1110008L16Rik,1190003J15Rik,1190005F20Rik,1600015I10Rik,1600027N09Rik,1810035L17Rik,2310079F23Rik,2410022L05Rik,2510012J08Rik,4933416C03Rik,5430437P03Rik,6030422M02Rik,6330577E15Rik,6530401N04Rik,AU015228,AU041133,Aars,Aars2,Aarsd1,Abcb7,Abcb8,Abcc10,Abcc2,Abcc3,Abcd3,Abce1,Abcf1,Abcf2,Abp1,Abt1,Acadl,Acadm,Accs,Accsl,Acer2,Acer3,Acin1,Actr8,Acy1,Ada,Adcy…	NA	NA	NA	NA	NA	2500003M10Rik,Aicda,Apobec1,Arl4a,Azin1,Banp,Bclaf1,Brdt,Bzw1,Ccnl1,Cdk12,Cdk13,Cenpv,Cirbp,Cited2,Ddah2,Ddit3,Ddx5,Eef1a1,Eef1e1,Ehmt1,Eif4g2,Eif5,Eprs,Ftcd,Fubp1,Gata2,Gmeb1,Gtf2f1,H2afx,H3f3a,H3f3b,Hist1h1t,Hist1h2ah,Hist1h2ai,Hist1h2bh,Hist1h3a,Hist1h3e,Hist1h3f,Hist1h4c,Hist1h4d,Hist1h4h,Hist1h4i,Hist1h4k,Hnrnpa2b1,Hnrnpab,Hsp90aa1,Ints6,Jmjd6,Jun,Jund,Klf10,Klf7,Mat2a,Med1,Mnt,Ncapd2,Nhp2,O…	NA	NA	NA	NA
GO Biological Process	nucleic acid metabolic process	0						0					0610007P08Rik,0610031J06Rik,1110002N22Rik,1110008L16Rik,1190005F20Rik,1600027N09Rik,1810035L17Rik,2310079F23Rik,2410022L05Rik,2510012J08Rik,4933416C03Rik,5430437P03Rik,6030422M02Rik,6330577E15Rik,AU015228,AU041133,Aars,Aars2,Aarsd1,Abt1,Acin1,Actr8,Adnp,Aes,Aff2,Aff3,Ahcyl1,Ahrr,Akap8,Akirin2,Akna,Alkbh1,Ang,Apaf1,Apobec4,Aptx,Aqr,Arid1a,Arid5a,Arrb2,Ascl3,Ash1l,Asxl3,Atad2,Atf1,Atf2,Atf4,Atf7,At…	NA	NA	NA	NA	NA	2500003M10Rik,Aicda,Apobec1,Banp,Bclaf1,Brdt,Bzw1,Ccnl1,Cdk12,Cdk13,Cenpv,Cirbp,Cited2,Ddit3,Ddx5,Eef1e1,Ehmt1,Eif4g2,Eif5,Eprs,Fubp1,Gata2,Gmeb1,Gtf2f1,H2afx,H3f3a,H3f3b,Hist1h1t,Hist1h2ah,Hist1h2ai,Hist1h2bh,Hist1h3a,Hist1h3e,Hist1h3f,Hist1h4c,Hist1h4d,Hist1h4h,Hist1h4i,Hist1h4k,Hnrnpa2b1,Hnrnpab,Ints6,Jmjd6,Jun,Jund,Klf10,Klf7,Med1,Mnt,Ncapd2,Nhp2,Obfc2a,Phf19,Polg2,Polr2a,Ptbp1,Raly,Rb1cc1,Rp…	NA	NA	NA	NA
GO Biological Process	nucleobase-containing compound metabolic process	0						0					0610007P08Rik,0610031J06Rik,1110002N22Rik,1110008L16Rik,1190003J15Rik,1190005F20Rik,1600027N09Rik,1810035L17Rik,2310079F23Rik,2410022L05Rik,2510012J08Rik,4933416C03Rik,5430437P03Rik,6030422M02Rik,6330577E15Rik,AU015228,AU041133,Aars,Aars2,Aarsd1,Abcb7,Abcb8,Abcc10,Abcc2,Abcc3,Abcd3,Abce1,Abcf1,Abcf2,Abt1,Acin1,Actr8,Ada,Adcy10,Adcy2,Adnp,Adss,Aes,Aff2,Aff3,Ahcyl1,Ahrr,Ak3,Ak4,Akap8,Akirin2,Akna,A…	NA	NA	NA	NA	NA	2500003M10Rik,Aicda,Apobec1,Arl4a,Banp,Bclaf1,Brdt,Bzw1,Ccnl1,Cdk12,Cdk13,Cenpv,Cirbp,Cited2,Ddit3,Ddx5,Eef1a1,Eef1e1,Ehmt1,Eif4g2,Eif5,Eprs,Fubp1,Gata2,Gmeb1,Gtf2f1,H2afx,H3f3a,H3f3b,Hist1h1t,Hist1h2ah,Hist1h2ai,Hist1h2bh,Hist1h3a,Hist1h3e,Hist1h3f,Hist1h4c,Hist1h4d,Hist1h4h,Hist1h4i,Hist1h4k,Hnrnpa2b1,Hnrnpab,Hsp90aa1,Ints6,Jmjd6,Jun,Jund,Klf10,Klf7,Mat2a,Med1,Mnt,Ncapd2,Nhp2,Obfc2a,Pde4c,Phf19…	NA	NA	NA	NA
GO Biological Process	posttranscriptional regulation of gene expression	0											Aars,Aarsd1,Abcf1,Ang,Ang5,Apbb2,Apoa2,Bcl3,Boll,Calcr,Calr,Caprin2,Cdk4,Cdkn2a,Clp1,Cpeb2,Dazl,Ddx25,Dhx9,Dnaja3,Dpm2,Dpm3,Eefsec,Eif2a,Eif2ak4,Eif2b1,Eif2b2,Eif2b4,Eif2c1,Eif2c3,Eif2c4,Eif3b,Eif3k,Eif4e2,Eif4ebp3,Eif5b,Elavl1,Ep300,Fam129a,Fbxw11,Flna,Fmr1,Gipc1,Gm672,Gnb2l1,Hnrnpd,Hnrnpu,Hspd1,Igf2bp3,Il6,Krt7,Lsm14a,Lsm14b,Mapkapk2,Mdm4,Morc3,Mtif2,Myd88,Mylip,Nanos2,Ncbp1,Pa2g4,Paip2,Park7,P…	NA	NA	NA	NA	NA	NA	NA	NA	NA	NA
GO Biological Process	primary metabolic process	0											0610007P08Rik,0610031J06Rik,1110002N22Rik,1110008L16Rik,1110034A24Rik,1190003J15Rik,1190005F20Rik,1600027N09Rik,1700074P13Rik,1810009J06Rik,1810014F10Rik,1810035L17Rik,1810074P20Rik,2010111I01Rik,2310079F23Rik,2410022L05Rik,2510012J08Rik,2810006K23Rik,2810422J05Rik,2810422O20Rik,4930402F06Rik,4930568D16Rik,4932415M13Rik,4933406M09Rik,4933416C03Rik,5133401N09Rik,5430437P03Rik,6030422M02Rik,6330577…	NA	NA	NA	NA	NA	NA	NA	NA	NA	NA
GO Biological Process	protein metabolic process	0											1110034A24Rik,1700074P13Rik,1810009J06Rik,1810074P20Rik,2010111I01Rik,2410022L05Rik,2810006K23Rik,2810422J05Rik,2810422O20Rik,4932415M13Rik,5430437P03Rik,9930032O22Rik,A830007P12Rik,AF366264,Aars,Aars2,Aarsd1,Abcf1,Abl2,Acr,Acvr1,Acvr1b,Acvr1c,Acy1,Adam10,Adam11,Adam17,Adam18,Adam23,Adam28,Adam3,Adam6a,Adam6b,Adam7,Adam9,Adamdec1,Adamts10,Adamts13,Adamts14,Adamts20,Adamts3,Adamts4,Adamts9,Adh5,Ad…	NA	NA	NA	NA	NA	NA	NA	NA	NA	NA
GO Biological Process	regulation of translation	3.78993e-305											Aars,Aarsd1,Abcf1,Ang,Ang5,Bcl3,Boll,Calr,Caprin2,Cdk4,Cpeb2,Dazl,Ddx25,Eefsec,Eif2a,Eif2ak4,Eif2b1,Eif2b2,Eif2b4,Eif2c1,Eif2c3,Eif2c4,Eif3b,Eif3k,Eif4e2,Eif4ebp3,Eif5b,Ep300,Fam129a,Fmr1,Gm672,Gnb2l1,Igf2bp3,Il6,Krt7,Lsm14a,Lsm14b,Mtif2,Nanos2,Ncbp1,Pa2g4,Paip2,Piwil4,Ppp1ca,Ppp1r15a,Ppp1r15b,Ptms,Qk,Rbm14,Rbm4b,Rgs2,Rps27l,Rps6kb1,Rps6kb2,Rps9,Samd4,Sepsecs,Serp1,Sox4,Srp14,Srp9,Taco1,Tia1,Tnf,…	NA	NA	NA	NA	NA	NA	NA	NA	NA	NA
GO Biological Process	ribonucleoprotein complex biogenesis	3.50341949466028e-320											Atxn2,Bat1a,Bms1,Bop1,Brix1,Bysl,C1d,Cdkn2a,Clp1,Crnkl1,Dcaf13,Dync1h1,Eftud1,Eif2a,Eif3a,Eif3d,Eif6,Eri1,Exosc3,Exosc6,Exosc7,Fbl,Fbll1,Ftsj2,Ftsj3,Gemin6,Imp3,Imp4,Lsm14a,Mphosph10,Mrto4,Nhp2l1,Nip7,Nol9,Nop10,Nop2,Nop58,Npm3,Nsa2,Pa2g4,Pdcd11,Pes1,Pih1d1,Prmt7,Rc3h1,Rpl14,Rpl24,Rpl26,Rpl7a,Rplp0,Rps14,Rps16,Rps17,Rps18,Rps21,Rps25,Rps28,Rps8,Rpsa,Rrn3,Rrp1b,Rrp36,Sbds,Sip1,Sirt1,Slu7,Srpk2,Srs…	NA	NA	NA	NA	NA	NA	NA	NA	NA	NA
GO Biological Process	RNA metabolic process	0						7.36442e-248					0610031J06Rik,1110002N22Rik,1110008L16Rik,1190005F20Rik,1600027N09Rik,1810035L17Rik,2310079F23Rik,2410022L05Rik,2510012J08Rik,4933416C03Rik,AU015228,Aars,Aars2,Aarsd1,Abt1,Actr8,Adnp,Aes,Aff2,Aff3,Ahcyl1,Ahrr,Akirin2,Akna,Alkbh1,Ang,Apobec4,Aqr,Arid1a,Arid5a,Arrb2,Ascl3,Ash1l,Asxl3,Atad2,Atf1,Atf2,Atf4,Atf7,Atoh7,Atxn7,Atxn7l3,Barx2,Bat1a,Baz1a,Bcl3,Bcl6,Bcl9l,Bdp1,Bhlhe40,Bmi1,Bmpr2,Bnc1,Bop1,Br…	NA	NA	NA	NA	NA	2500003M10Rik,Aicda,Apobec1,Banp,Bclaf1,Brdt,Bzw1,Ccnl1,Cdk12,Cdk13,Cirbp,Cited2,Ddit3,Ddx5,Eif4g2,Eif5,Eprs,Fubp1,Gata2,Gmeb1,Gtf2f1,Hnrnpa2b1,Hnrnpab,Ints6,Jmjd6,Jun,Jund,Klf10,Klf7,Med1,Mnt,Nhp2,Phf19,Polg2,Polr2a,Ptbp1,Raly,Rb1cc1,Rps7,Sertad1,Sertad3,Sfpq,Smyd2,Srsf2,Srsf3,Tsc22d1,Txnl4a,Vegfa,Zfhx3,Zfp110,Zfp329,Zik1,Zscan18,Zscan22,Zscan4b,Zscan4c,Zscan4d,Zscan4e,Zscan4f	NA	NA	NA	NA
GO Biological Process	translation	0											1110034A24Rik,2810006K23Rik,2810422J05Rik,Aars,Aars2,Aarsd1,Abcf1,Aimp2,Cars2,Cyld,Dalrd3,Eef1b2,Eef1g,Eef2,Eefsec,Eftud1,Eftud2,Eif2a,Eif2ak2,Eif2ak4,Eif2b1,Eif2b2,Eif2b3,Eif2b4,Eif2c3,Eif2d,Eif2s3y,Eif3a,Eif3b,Eif3d,Eif3h,Eif3j,Eif3k,Eif4a1,Eif4a2,Eif4e2,Eif4h,Eif5b,Eif6,Etf1,Farsa,Farsb,Fau,Gars,Gfm2,Gm15427,Gm15450,Gm4832,Gm4925,Gm6654,Gspt1,Gtf2b,Hars,Hars2,Ict1,Ighmbp2,Itgam,Lars,Mars,Mars2…	NA	NA	NA	NA	NA	NA	NA	NA	NA	NA
GO Molecular Function	nucleotide binding	0											0610007P08Rik,1810035L17Rik,2610024G14Rik,2610528E23Rik,2810030E01Rik,4921513D23Rik,4931409K22Rik,4932415M13Rik,5133401N09Rik,5430435G22Rik,6030422M02Rik,A830007P12Rik,Aars,Aars2,Aarsd1,Aasdh,Abcb7,Abcb8,Abcc10,Abcc2,Abcc3,Abcd3,Abce1,Abcf1,Abcf2,Abl2,Abt1,Acin1,Acly,Acot12,Actg1,Actg2,Actr1a,Actr1b,Actr2,Acvr1,Acvr1b,Acvr1c,Adcy10,Adcy2,Adh1,Adh4,Adh5,Adh6a,Adh7,Adrbk1,Adrbk2,Adss,Afg3l1,Agap2,A…	NA	NA	NA	NA	NA	NA	NA	NA	NA	NA
GO Molecular Function	RNA binding	0						9.74633e-141					1190005F20Rik,1810035L17Rik,2810006K23Rik,4921511C20Rik,4921513D23Rik,Aars,Aars2,Abt1,Aff2,Ang,Anxa1,Aqr,Bard1,Bat1a,Boll,C1d,Calr,Caprin2,Ccdc55,Cdc5l,Cherp,Cnbp,Cpeb2,Cpsf6,Crnkl1,Csde1,Cstf2,Ctu1,Ctu2,Dazap1,Dazl,Dcp2,Ddx10,Ddx11,Ddx17,Ddx18,Ddx21,Ddx25,Ddx3x,Ddx3y,Ddx43,Ddx46,Ddx49,Ddx52,Ddx54,Ddx55,Ddx58,Ddx59,Ddx6,Dhx9,Dppa5a,Eef1b2,Eef1g,Eef2,Eefsec,Eftud1,Eftud2,Eif2a,Eif2ak2,Eif2ak4,Eif2…	NA	NA	NA	NA	NA	2500003M10Rik,Aimp1,Ankhd1,Apobec1,Cirbp,Ddx5,Eef1a1,Eef1e1,Eif4g2,Eif5,Eprs,Fubp1,Fus,G3bp1,Hnrnpa2b1,Hnrnpab,Jmjd6,Ncl,Nhp2,Nop56,Obfc2a,Poldip3,Ptbp1,Raly,Rpl10a,Rpl12,Rps5,Sfpq,Srsf2,Srsf3,Unc50,Zc3hav1	NA	NA	NA	NA
GO Molecular Function	structural constituent of ribosome	0											1110034A24Rik,2810422J05Rik,Cyld,Fau,Gm15427,Gm15450,Gm4832,Gm4925,Gm6654,Itgam,Mrp63,Mrpl1,Mrpl12,Mrpl14,Mrpl16,Mrpl17,Mrpl18,Mrpl2,Mrpl20,Mrpl21,Mrpl23,Mrpl27,Mrpl28,Mrpl30,Mrpl32,Mrpl35,Mrpl37,Mrpl4,Mrpl41,Mrpl49,Mrpl55,Mrps10,Mrps14,Mrps15,Mrps16,Mrps18a,Mrps18b,Mrps18c,Mrps22,Mrps23,Mrps24,Mrps7,Mrps9,Rpl10,Rpl10l,Rpl11,Rpl13,Rpl14,Rpl17,Rpl19,Rpl23,Rpl24,Rpl26,Rpl27,Rpl27a,Rpl28,Rpl29,Rpl31…	NA	NA	NA	NA	NA	NA	NA	NA	NA	NA
MSigDB Pathway	Alzheimer s disease	3.1853e-281											Adam10,Adam17,Apaf1,Atp2a1,Atp2a2,Atp2a3,Atp5a1,Atp5b,Atp5d,Atp5g1,Atp5g3,Atp5h,Atp5j,Bace2,Bad,Cacna1c,Calml3,Casp3,Cox4i1,Cox5a,Cox5b,Cox6a2,Cox6b1,Cox7a2l,Cox7b,Cox7c,Ctnna2,Fadd,Gapdh,Gsk3b,Itpr1,Nae1,Ncstn,Ndufa10,Ndufa6,Ndufa7,Ndufa9,Ndufb10,Ndufb2,Ndufb3,Ndufb6,Ndufb7,Ndufb8,Ndufb9,Ndufc1,Ndufs1,Ndufs2,Ndufs3,Ndufs7,Ndufs8,Ndufv2,Ndufv3,Plcb2,Plcb3,Plcb4,Ppp3ca,Ppp3cb,Ppp3cc,Ptgs2,Sdha,Sdh…	NA	NA	NA	NA	NA	NA	NA	NA	NA	NA
MSigDB Pathway	Fc epsilon RI signaling pathway	3.64659e-164											Akt3,Btk,Fcer1g,Grb2,Il5,Inpp5d,Kras,Lat,Lyn,Map2k3,Map2k4,Map2k7,Mapk10,Mapk11,Mapk12,Mapk13,Mapk14,Nras,Pdpk1,Pik3ca,Pik3r1,Pik3r3,Pla2g12b,Pla2g2a,Pla2g2c,Pla2g2d,Pla2g2e,Pla2g2f,Pla2g4b,Pla2g4e,Plcg1,Prkcd,Prkce,Rac3,Sos1,Tnf,Vav1,Vav2,Vav3	NA	NA	NA	NA	NA	NA	NA	NA	NA	NA
MSigDB Pathway	Fc gamma R-mediated phagocytosis	3.52018e-184											Akt3,Arf6,Arpc1b,Arpc2,Arpc3,Arpc5,Arpc5l,Cfl1,Crk,Crkl,Dnm1l,Dock2,Fcgr2b,Fcgr4,Hck,Inpp5d,Lat,Limk1,Lyn,Marcksl1,Pak1,Pik3ca,Pik3r1,Pik3r3,Pikfyve,Pip4k2b,Pip5k1c,Pla2g4b,Pla2g4d,Pla2g4e,Pla2g4f,Plcg1,Ppap2c,Prkcd,Prkce,Ptprc,Rps6kb1,Rps6kb2,Scin,Vasp,Vav1,Vav2,Vav3,Wasf2	NA	NA	NA	NA	NA	NA	NA	NA	NA	NA
MSigDB Pathway	Genes involved in Diabetes pathways	0											Aco2,Aldoc,Atf4,Atp5a1,Atp5b,Atp5d,Atp5g1,Atp5h,Atp5j,Cacna1c,Cacna1e,Cacnb2,Cox4i1,Cox5a,Cox5b,Cox6b1,Cox7a2l,Cox7b,Cox7c,Cs,Dlat,Dnajb9,Eno3,Etfb,Etfdh,Exoc2,Exoc5,Exoc8,Fau,Ffar1,Gapdh,Gapdhs,Gck,Glp1r,Gm15427,Gm15450,Gna11,Gna14,Gna15,Gnb3,Gnb4,Gng11,Gng13,Gng3,Gngt1,Herpud1,Idh2,Igf1,Igfbp4,Itpr1,Kcng2,Kif5b,Klf4,Mdh2,Mmp2,Ndufa10,Ndufa11,Ndufa12,Ndufa6,Ndufa7,Ndufa9,Ndufb10,Ndufb2,Ndufb3,Nd…	NA	NA	NA	NA	NA	NA	NA	NA	NA	NA
MSigDB Pathway	Genes involved in Electron Transport Chain	3.06043e-167											Cox4i1,Cox5a,Cox5b,Cox6b1,Cox7a2l,Cox7b,Cox7c,Etfb,Etfdh,Ndufa10,Ndufa11,Ndufa12,Ndufa6,Ndufa7,Ndufa9,Ndufb10,Ndufb2,Ndufb3,Ndufb6,Ndufb7,Ndufb8,Ndufb9,Ndufc1,Ndufs1,Ndufs2,Ndufs3,Ndufs7,Ndufs8,Ndufv2,Ndufv3,Ptgs2,Sdha,Sdhc,Sdhd,Uqcr10,Uqcr11,Uqcrb,Uqcrh,Uqcrq	NA	NA	NA	NA	NA	NA	NA	NA	NA	NA
MSigDB Pathway	Genes involved in Formation of a pool of free 40S subunits	5.98301e-253						1.79036e-32					Eif3a,Eif3b,Eif3d,Eif3h,Eif3j,Eif3k,Fau,Gm15427,Gm15450,Rpl10,Rpl11,Rpl13,Rpl14,Rpl17,Rpl19,Rpl23,Rpl24,Rpl26,Rpl27,Rpl27a,Rpl28,Rpl29,Rpl31,Rpl32,Rpl35,Rpl35a,Rpl36,Rpl36a,Rpl37a,Rpl3l,Rpl4,Rpl6,Rpl7a,Rpl8,Rpl9,Rplp0,Rplp2,Rps10,Rps11,Rps12,Rps14,Rps15,Rps16,Rps17,Rps18,Rps2,Rps20,Rps21,Rps25,Rps26,Rps27,Rps27a,Rps28,Rps6,Rps8,Rps9,Rpsa,Uba52	NA	NA	NA	NA	NA	Rpl10a,Rpl12,Rpl3,Rps19,Rps5,Rps7,Ubc	NA	NA	NA	NA
MSigDB Pathway	Genes involved in Formation of the ternary complex, and subsequently, the 43S complex	5.22864e-125											Eif3a,Eif3b,Eif3d,Eif3h,Eif3j,Eif3k,Fau,Gm15450,Rps10,Rps11,Rps12,Rps14,Rps15,Rps16,Rps17,Rps18,Rps2,Rps20,Rps21,Rps25,Rps26,Rps27,Rps27a,Rps28,Rps6,Rps8,Rps9,Rpsa	NA	NA	NA	NA	NA	NA	NA	NA	NA	NA
MSigDB Pathway	Genes involved in Gene Expression	0						1.11375e-92					Aars,Aars2,Aimp2,Cars2,Ccnc,Ccnt2,Clp1,Cstf2,Ctdp1,Ddx23,Dhx9,Eef1b2,Eef1g,Eef2,Eftud2,Eif2b1,Eif2b2,Eif2b3,Eif2b4,Eif3a,Eif3b,Eif3d,Eif3h,Eif3j,Eif3k,Eif4a1,Eif4a2,Eif4h,Eif5b,Ercc3,Esrra,Etf1,Farsa,Farsb,Fau,Gars,Gm15427,Gm15450,Gtf2a2,Gtf2b,Gtf2e1,Gtf2h3,Gtf2h4,Hars,Hars2,Hexim1,Hnrnpa0,Hnrnpa1,Hnrnpa3,Hnrnpc,Hnrnpd,Hnrnph2,Hnrnpl,Hnrnpm,Hnrnpu,Kat2a,Lars,Maml3,Mars,Mars2,Med10,Med17,Med20,Med…	NA	NA	NA	NA	NA	Aimp1,Eef1a1,Eef1e1,Eif5,Eprs,Fus,Gtf2f1,Hnrnpa2b1,Med1,Polr2a,Ptbp1,Rpl10a,Rpl12,Rpl3,Rps19,Rps5,Rps7,Srsf2,Srsf3,Txnl4a,Ubc	NA	NA	NA	NA
MSigDB Pathway	Genes involved in Glucose Regulation of Insulin Secretion	7.7154e-274											Aco2,Aldoc,Atp5a1,Atp5b,Atp5d,Atp5g1,Atp5h,Atp5j,Cacna1c,Cacna1e,Cacnb2,Cox4i1,Cox5a,Cox5b,Cox6b1,Cox7a2l,Cox7b,Cox7c,Cs,Dlat,Eno3,Etfb,Etfdh,Gapdh,Gapdhs,Gck,Idh2,Mdh2,Ndufa10,Ndufa11,Ndufa12,Ndufa6,Ndufa7,Ndufa9,Ndufb10,Ndufb2,Ndufb3,Ndufb6,Ndufb7,Ndufb8,Ndufb9,Ndufc1,Ndufs1,Ndufs2,Ndufs3,Ndufs7,Ndufs8,Ndufv2,Ndufv3,Pdhx,Pgam2,Ptgs2,Sdha,Sdhc,Sdhd,Slc25a4,Slc2a1,Snap25,Stx1a,Suclg2,Tpi1,Uqcr10,…	NA	NA	NA	NA	NA	NA	NA	NA	NA	NA
MSigDB Pathway	Genes involved in GTP hydrolysis and joining of the 60S ribosomal subunit	4.17498e-269						4.4605e-37					Eif3a,Eif3b,Eif3d,Eif3h,Eif3j,Eif3k,Eif4a1,Eif4a2,Eif4h,Eif5b,Fau,Gm15427,Gm15450,Rpl10,Rpl11,Rpl13,Rpl14,Rpl17,Rpl19,Rpl23,Rpl24,Rpl26,Rpl27,Rpl27a,Rpl28,Rpl29,Rpl31,Rpl32,Rpl35,Rpl35a,Rpl36,Rpl36a,Rpl37a,Rpl3l,Rpl4,Rpl6,Rpl7a,Rpl8,Rpl9,Rplp0,Rplp2,Rps10,Rps11,Rps12,Rps14,Rps15,Rps16,Rps17,Rps18,Rps2,Rps20,Rps21,Rps25,Rps26,Rps27,Rps27a,Rps28,Rps6,Rps8,Rps9,Rpsa,Uba52	NA	NA	NA	NA	NA	Eif5,Rpl10a,Rpl12,Rpl3,Rps19,Rps5,Rps7,Ubc	NA	NA	NA	NA
MSigDB Pathway	Genes involved in Influenza Life Cycle	1.3339e-302						4.90738e-56					Calr,Canx,Clta,Fau,Gm15427,Gm15450,Hspa1a,Hspa1b,Kpnb1,Nup188,Nup43,Nup50,Nup54,Nup93,Nupl1,Polr2b,Polr2g,Polr2l,Ran,Ranbp2,Rpl10,Rpl11,Rpl13,Rpl14,Rpl17,Rpl19,Rpl23,Rpl24,Rpl26,Rpl27,Rpl27a,Rpl28,Rpl29,Rpl31,Rpl32,Rpl35,Rpl35a,Rpl36,Rpl36a,Rpl37a,Rpl3l,Rpl4,Rpl6,Rpl7a,Rpl8,Rpl9,Rplp0,Rplp2,Rps10,Rps11,Rps12,Rps14,Rps15,Rps16,Rps17,Rps18,Rps2,Rps20,Rps21,Rps25,Rps26,Rps27,Rps27a,Rps28,Rps6,Rps8,R…	NA	NA	NA	NA	NA	Cltc,Gtf2f1,Hsp90aa1,Kpna1,Polr2a,Rpl10a,Rpl12,Rpl3,Rps19,Rps5,Rps7,Ubc	NA	NA	NA	NA
MSigDB Pathway	Genes involved in Influenza Viral RNA Transcription and Replication	6.15943e-237						3.25715e-47					Fau,Gm15427,Gm15450,Polr2b,Polr2g,Polr2l,Rpl10,Rpl11,Rpl13,Rpl14,Rpl17,Rpl19,Rpl23,Rpl24,Rpl26,Rpl27,Rpl27a,Rpl28,Rpl29,Rpl31,Rpl32,Rpl35,Rpl35a,Rpl36,Rpl36a,Rpl37a,Rpl3l,Rpl4,Rpl6,Rpl7a,Rpl8,Rpl9,Rplp0,Rplp2,Rps10,Rps11,Rps12,Rps14,Rps15,Rps16,Rps17,Rps18,Rps2,Rps20,Rps21,Rps25,Rps26,Rps27,Rps27a,Rps28,Rps6,Rps8,Rps9,Rpsa,Uba52	NA	NA	NA	NA	NA	Gtf2f1,Hsp90aa1,Polr2a,Rpl10a,Rpl12,Rpl3,Rps19,Rps5,Rps7,Ubc	NA	NA	NA	NA
MSigDB Pathway	Genes involved in Insulin Synthesis and Secretion	2.28273e-295											Fau,Gm15427,Gm15450,Kif5b,Pdx1,Rpl10,Rpl11,Rpl13,Rpl14,Rpl17,Rpl19,Rpl23,Rpl24,Rpl26,Rpl27,Rpl27a,Rpl28,Rpl29,Rpl31,Rpl32,Rpl35,Rpl35a,Rpl36,Rpl36a,Rpl37a,Rpl3l,Rpl4,Rpl6,Rpl7a,Rpl8,Rpl9,Rplp0,Rplp2,Rps10,Rps11,Rps12,Rps14,Rps15,Rps16,Rps17,Rps18,Rps2,Rps20,Rps21,Rps25,Rps26,Rps27,Rps27a,Rps28,Rps6,Rps8,Rps9,Rpsa,Sec11c,Sec61a1,Sec61a2,Sec61g,Snap25,Spcs2,Spcs3,Srp14,Srp19,Srp68,Srp9,Ssr1,Ssr2,Ss…	NA	NA	NA	NA	NA	NA	NA	NA	NA	NA
MSigDB Pathway	Genes involved in Integration of energy metabolism	0											Acly,Aco2,Adcy10,Adcy2,Aldoc,Atp5a1,Atp5b,Atp5d,Atp5g1,Atp5h,Atp5j,Cab39,Cacna1c,Cacna1e,Cacnb2,Cox4i1,Cox5a,Cox5b,Cox6b1,Cox7a2l,Cox7b,Cox7c,Cs,Dlat,Eno3,Etfb,Etfdh,Fasn,Gapdh,Gapdhs,Gck,Gnb3,Gnb4,Gng11,Gng13,Gng3,Idh2,Mdh2,Mlx,Ndufa10,Ndufa11,Ndufa12,Ndufa6,Ndufa7,Ndufa9,Ndufb10,Ndufb2,Ndufb3,Ndufb6,Ndufb7,Ndufb8,Ndufb9,Ndufc1,Ndufs1,Ndufs2,Ndufs3,Ndufs7,Ndufs8,Ndufv2,Ndufv3,Pdhx,Pdp1,Pdp2,Pdpk…	NA	NA	NA	NA	NA	NA	NA	NA	NA	NA
MSigDB Pathway	Genes involved in MAP kinases activation in TLR cascade	4.8553e-107											Atf1,Atf2,Creb1,Dusp4,Dusp6,Elk1,Fos,Map2k3,Map2k4,Map2k7,Map3k7,Mapk10,Mapk11,Mapk14,Mapk7,Mapkapk2,Mef2a,Mef2c,Ppp2ca,Ppp2r1a,Ppp2r5d,Rps6ka1,Rps6ka2,Tab2,Tlr3	NA	NA	NA	NA	NA	NA	NA	NA	NA	NA
MSigDB Pathway	Genes involved in MAPK targets/Nuclear events mediated by MAP kinases	1.35554e-82											Atf1,Atf2,Creb1,Dusp4,Dusp6,Elk1,Fos,Mapk10,Mapk11,Mapk14,Mapk7,Mapkapk2,Mef2a,Mef2c,Ppp2ca,Ppp2r1a,Ppp2r5d,Rps6ka1,Rps6ka2	NA	NA	NA	NA	NA	NA	NA	NA	NA	NA
MSigDB Pathway	Genes involved in Metabolism of proteins	0						6.78378e-54					Cct4,Cct5,Cct6a,Cct7,Cct8,Dpm1,Dpm2,Dpm3,Eef1b2,Eef1g,Eef2,Eif2b1,Eif2b2,Eif2b3,Eif2b4,Eif3a,Eif3b,Eif3d,Eif3h,Eif3j,Eif3k,Eif4a1,Eif4a2,Eif4h,Eif5b,Etf1,Fau,Fbxo30,Fbxw2,Fkbp9,Gm15427,Gm15450,Kif13a,Pfdn1,Pfdn2,Pigg,Pigm,Pigs,Pigu,Pigx,Plaur,Rpl10,Rpl11,Rpl13,Rpl14,Rpl17,Rpl19,Rpl23,Rpl24,Rpl26,Rpl27,Rpl27a,Rpl28,Rpl29,Rpl31,Rpl32,Rpl35,Rpl35a,Rpl36,Rpl36a,Rpl37a,Rpl3l,Rpl4,Rpl6,Rpl7a,Rpl8,Rpl9,…	NA	NA	NA	NA	NA	Actb,Eef1a1,Eif5,Fbxw7,Nop56,Rpl10a,Rpl12,Rpl3,Rps19,Rps5,Rps7,Ubc	NA	NA	NA	NA
MSigDB Pathway	Genes involved in Nuclear Events (kinase and transcription factor activation)	4.01812e-70											Atf1,Creb1,Dusp4,Dusp6,Elk1,Mapk11,Mapk14,Mapk7,Mapkapk2,Mef2a,Mef2c,Ppp2ca,Ppp2r1a,Ppp2r5d,Rps6ka1,Rps6ka2	NA	NA	NA	NA	NA	NA	NA	NA	NA	NA
MSigDB Pathway	Genes involved in Peptide chain elongation	7.4573e-232						9.75943e-38					Eef2,Fau,Gm15427,Gm15450,Rpl10,Rpl11,Rpl13,Rpl14,Rpl17,Rpl19,Rpl23,Rpl24,Rpl26,Rpl27,Rpl27a,Rpl28,Rpl29,Rpl31,Rpl32,Rpl35,Rpl35a,Rpl36,Rpl36a,Rpl37a,Rpl3l,Rpl4,Rpl6,Rpl7a,Rpl8,Rpl9,Rplp0,Rplp2,Rps10,Rps11,Rps12,Rps14,Rps15,Rps16,Rps17,Rps18,Rps2,Rps20,Rps21,Rps25,Rps26,Rps27,Rps27a,Rps28,Rps6,Rps8,Rps9,Rpsa,Uba52	NA	NA	NA	NA	NA	Eef1a1,Rpl10a,Rpl12,Rpl3,Rps19,Rps5,Rps7,Ubc	NA	NA	NA	NA
MSigDB Pathway	Genes involved in Regulation of beta-cell development	2.73147e-271											Akt3,Fau,Foxa2,Foxa3,Foxo1,Gck,Gm15427,Gm15450,Hnf1b,Nkx6-1,Notch1,Nr5a2,Onecut1,Pdx1,Rpl10,Rpl11,Rpl13,Rpl14,Rpl17,Rpl19,Rpl23,Rpl24,Rpl26,Rpl27,Rpl27a,Rpl28,Rpl29,Rpl31,Rpl32,Rpl35,Rpl35a,Rpl36,Rpl36a,Rpl37a,Rpl3l,Rpl4,Rpl6,Rpl7a,Rpl8,Rpl9,Rplp0,Rplp2,Rps10,Rps11,Rps12,Rps14,Rps15,Rps16,Rps17,Rps18,Rps2,Rps20,Rps21,Rps25,Rps26,Rps27,Rps27a,Rps28,Rps6,Rps8,Rps9,Rpsa,Uba52	NA	NA	NA	NA	NA	NA	NA	NA	NA	NA
MSigDB Pathway	Genes involved in Regulation of gene expression in beta cells	8.29271e-256						2.8217e-32					Akt3,Fau,Foxa2,Foxa3,Foxo1,Gck,Gm15427,Gm15450,Nkx6-1,Pdx1,Rpl10,Rpl11,Rpl13,Rpl14,Rpl17,Rpl19,Rpl23,Rpl24,Rpl26,Rpl27,Rpl27a,Rpl28,Rpl29,Rpl31,Rpl32,Rpl35,Rpl35a,Rpl36,Rpl36a,Rpl37a,Rpl3l,Rpl4,Rpl6,Rpl7a,Rpl8,Rpl9,Rplp0,Rplp2,Rps10,Rps11,Rps12,Rps14,Rps15,Rps16,Rps17,Rps18,Rps2,Rps20,Rps21,Rps25,Rps26,Rps27,Rps27a,Rps28,Rps6,Rps8,Rps9,Rpsa,Uba52	NA	NA	NA	NA	NA	Rpl10a,Rpl12,Rpl3,Rps19,Rps5,Rps7,Ubc	NA	NA	NA	NA
MSigDB Pathway	Genes involved in Regulation of Insulin Secretion	0											Aco2,Aldoc,Atp5a1,Atp5b,Atp5d,Atp5g1,Atp5h,Atp5j,Cacna1c,Cacna1e,Cacnb2,Cox4i1,Cox5a,Cox5b,Cox6b1,Cox7a2l,Cox7b,Cox7c,Cs,Dlat,Eno3,Etfb,Etfdh,Ffar1,Gapdh,Gapdhs,Gck,Glp1r,Gna11,Gna14,Gna15,Gnb3,Gnb4,Gng11,Gng13,Gng3,Gngt1,Idh2,Itpr1,Kcng2,Mdh2,Ndufa10,Ndufa11,Ndufa12,Ndufa6,Ndufa7,Ndufa9,Ndufb10,Ndufb2,Ndufb3,Ndufb6,Ndufb7,Ndufb8,Ndufb9,Ndufc1,Ndufs1,Ndufs2,Ndufs3,Ndufs7,Ndufs8,Ndufv2,Ndufv3,Pdhx…	NA	NA	NA	NA	NA	NA	NA	NA	NA	NA
MSigDB Pathway	Genes involved in Translation	6.47731e-303						1.28583e-41					Eef1b2,Eef1g,Eef2,Eif2b1,Eif2b2,Eif2b3,Eif2b4,Eif3a,Eif3b,Eif3d,Eif3h,Eif3j,Eif3k,Eif4a1,Eif4a2,Eif4h,Eif5b,Etf1,Fau,Gm15427,Gm15450,Rpl10,Rpl11,Rpl13,Rpl14,Rpl17,Rpl19,Rpl23,Rpl24,Rpl26,Rpl27,Rpl27a,Rpl28,Rpl29,Rpl31,Rpl32,Rpl35,Rpl35a,Rpl36,Rpl36a,Rpl37a,Rpl3l,Rpl4,Rpl6,Rpl7a,Rpl8,Rpl9,Rplp0,Rplp2,Rps10,Rps11,Rps12,Rps14,Rps15,Rps16,Rps17,Rps18,Rps2,Rps20,Rps21,Rps25,Rps26,Rps27,Rps27a,Rps28,Rp…	NA	NA	NA	NA	NA	Eef1a1,Eif5,Rpl10a,Rpl12,Rpl3,Rps19,Rps5,Rps7,Ubc	NA	NA	NA	NA
MSigDB Pathway	Genes involved in Translation initiation complex formation	2.85015e-137											Eif3a,Eif3b,Eif3d,Eif3h,Eif3j,Eif3k,Eif4a1,Eif4a2,Eif4h,Fau,Gm15450,Rps10,Rps11,Rps12,Rps14,Rps15,Rps16,Rps17,Rps18,Rps2,Rps20,Rps21,Rps25,Rps26,Rps27,Rps27a,Rps28,Rps6,Rps8,Rps9,Rpsa	NA	NA	NA	NA	NA	NA	NA	NA	NA	NA
MSigDB Pathway	Genes involved in Viral mRNA Translation	3.7937e-227						9.73737e-33					Fau,Gm15427,Gm15450,Rpl10,Rpl11,Rpl13,Rpl14,Rpl17,Rpl19,Rpl23,Rpl24,Rpl26,Rpl27,Rpl27a,Rpl28,Rpl29,Rpl31,Rpl32,Rpl35,Rpl35a,Rpl36,Rpl36a,Rpl37a,Rpl3l,Rpl4,Rpl6,Rpl7a,Rpl8,Rpl9,Rplp0,Rplp2,Rps10,Rps11,Rps12,Rps14,Rps15,Rps16,Rps17,Rps18,Rps2,Rps20,Rps21,Rps25,Rps26,Rps27,Rps27a,Rps28,Rps6,Rps8,Rps9,Rpsa,Uba52	NA	NA	NA	NA	NA	Rpl10a,Rpl12,Rpl3,Rps19,Rps5,Rps7,Ubc	NA	NA	NA	NA
MSigDB Pathway	Huntington s disease	9.86956e-294											Ap2a2,Apaf1,Atp5a1,Atp5b,Atp5d,Atp5g1,Atp5g3,Atp5h,Atp5j,Bax,Casp3,Clta,Cox4i1,Cox5a,Cox5b,Cox6a2,Cox6b1,Cox7a2l,Cox7b,Cox7c,Creb1,Creb3l4,Dnali1,Ep300,Gpx1,Itpr1,Ndufa10,Ndufa6,Ndufa7,Ndufa9,Ndufb10,Ndufb2,Ndufb3,Ndufb6,Ndufb7,Ndufb8,Ndufb9,Ndufc1,Ndufs1,Ndufs2,Ndufs3,Ndufs7,Ndufs8,Ndufv2,Ndufv3,Nrf1,Plcb2,Plcb3,Plcb4,Polr2b,Polr2g,Polr2l,Ppid,Ptgs2,Rest,Sdha,Sdhc,Sdhd,Slc25a4,Sod1,Sod2,Taf4b,Tb…	NA	NA	NA	NA	NA	NA	NA	NA	NA	NA
MSigDB Pathway	MAPKinase Signaling Pathway	4.26437e-167											Araf,Atf2,Braf,Cebpa,Chuk,Creb1,Elk1,Fos,Grb2,Map2k3,Map2k4,Map2k7,Map3k2,Map3k4,Map3k5,Map3k7,Map4k1,Map4k2,Map4k3,Map4k4,Mapk10,Mapk11,Mapk12,Mapk13,Mapk14,Mapk4,Mapk7,Mapkapk2,Mef2a,Mef2c,Pak1,Pak2,Rela,Rps6ka1,Rps6ka2,Rps6kb1,Rps6kb2,Tgfbr1,Tradd,Traf2	NA	NA	NA	NA	NA	NA	NA	NA	NA	NA
MSigDB Pathway	Oxidative phosphorylation	5.96416e-253											Atp4a,Atp5a1,Atp5b,Atp5d,Atp5g1,Atp5g3,Atp5h,Atp5j,Atp6v0a2,Atp6v0c,Atp6v1b1,Atp6v1c1,Atp6v1c2,Atp6v1g1,Atp6v1g2,Atp6v1g3,Atp6v1h,Cox10,Cox11,Cox15,Cox17,Cox4i1,Cox5a,Cox5b,Cox6a2,Cox6b1,Cox7a2l,Cox7b,Cox7c,Ndufa10,Ndufa11,Ndufa6,Ndufa7,Ndufa9,Ndufb10,Ndufb2,Ndufb3,Ndufb6,Ndufb7,Ndufb8,Ndufb9,Ndufc1,Ndufs1,Ndufs2,Ndufs3,Ndufs7,Ndufs8,Ndufv2,Ndufv3,Ppa2,Ptgs2,Sdha,Sdhc,Sdhd,Tcirg1,Uqcr10,Uqcr11,Uq…	NA	NA	NA	NA	NA	NA	NA	NA	NA	NA
MSigDB Pathway	Parkinson s disease	8.72309e-249											Apaf1,Atp5a1,Atp5b,Atp5d,Atp5g1,Atp5g3,Atp5h,Atp5j,Casp3,Cox4i1,Cox5a,Cox5b,Cox6a2,Cox6b1,Cox7a2l,Cox7b,Cox7c,Htra2,Ndufa10,Ndufa6,Ndufa7,Ndufa9,Ndufb10,Ndufb2,Ndufb3,Ndufb6,Ndufb7,Ndufb8,Ndufb9,Ndufc1,Ndufs1,Ndufs2,Ndufs3,Ndufs7,Ndufs8,Ndufv2,Ndufv3,Park7,Ppid,Ptgs2,Sdha,Sdhc,Sdhd,Sept5,Slc18a2,Slc25a4,Uba1,Ube2g1,Ube2g2,Ube2j2,Uchl1,Uqcr10,Uqcr11,Uqcrb,Uqcrh,Uqcrq,Vdac1,Vdac2,Vdac3	NA	NA	NA	NA	NA	NA	NA	NA	NA	NA
MSigDB Pathway	Ribosome	5.16602e-236						1.09599e-32					Fau,Gm15427,Gm15450,Rpl10,Rpl10l,Rpl11,Rpl13,Rpl14,Rpl17,Rpl19,Rpl23,Rpl24,Rpl26,Rpl27,Rpl27a,Rpl28,Rpl29,Rpl31,Rpl32,Rpl35,Rpl35a,Rpl36,Rpl36a,Rpl36al,Rpl37a,Rpl3l,Rpl4,Rpl6,Rpl7a,Rpl8,Rpl9,Rplp0,Rplp2,Rps10,Rps11,Rps12,Rps15,Rps16,Rps17,Rps18,Rps2,Rps20,Rps21,Rps25,Rps26,Rps27,Rps27a,Rps27l,Rps28,Rps6,Rps8,Rps9,Rpsa,Uba52	NA	NA	NA	NA	NA	Rpl10a,Rpl12,Rpl3,Rps19,Rps5,Rps7,Ubc	NA	NA	NA	NA
MSigDB Pathway	Spliceosome	1.97032e-246											Acin1,Aqr,Bud31,Cdc5l,Cherp,Crnkl1,Ddx23,Ddx46,Dhx15,Dhx16,Eftud2,Hnrnpa1,Hnrnpa3,Hnrnpc,Hnrnpm,Hnrnpu,Hspa1a,Hspa1b,Hspa1l,Hspa8,Isy1,Lsm4,Ncbp1,Nhp2l1,Phf5a,Ppie,Ppih,Ppil1,Prpf38b,Prpf4,Prpf40a,Puf60,Rbm17,Rbm25,Sap130,Sart1,Sf3a2,Sf3a3,Sf3b1,Sf3b4,Sf3b5,Slu7,Snrnp70,Snrpa1,Snrpd1,Snrpe,Snrpg,Snw1,Srsf1,Srsf10,Srsf5,Srsf6,Srsf7,Thoc1,Thoc4,Tra2a,Tra2b,Wbp11	NA	NA	NA	NA	NA	NA	NA	NA	NA	NA
PANTHER Pathway	Angiogenesis	3.91344e-277											Akt3,Apc,Apc2,Araf,Arhgap8,Axin1,Bad,Birc5,Crk,Crkl,Ctnnb1,Dll1,Dll3,Dok2,Dvl1,Efnb2,Ephb2,Ephb3,F3,Fos,Frs3,Fzd1,Fzd2,Grb14,Grb2,Gsk3b,Hif1a,Hras1,Jag2,Jak1,Kras,Lpxn,Map2k4,Mapk14,Mapkapk2,Nos3,Notch1,Notch2,Notch4,Nras,Pak1,Pak2,Pdgfd,Pdgfrb,Pik3c2g,Pik3ca,Pik3r1,Pik3r3,Pla2g4b,Plcg1,Prkcc,Prkcd,Prkce,Prkch,Prkcz,Prkd3,Prr5,Pxn,Rasa1,Rbpjl,Rhob,Sos1,Tek,Tgfb1i1,Wnt2b,Wnt5b,Wnt7a	NA	NA	NA	NA	NA	NA	NA	NA	NA	NA
Pathway Commons	3 -UTR-mediated translational regulation	2.04123e-201											Eif3a,Eif3b,Eif3d,Eif3h,Eif3j,Eif3k,Eif4a1,Eif4a2,Eif4h,Fau,Gm15427,Rpl10,Rpl13,Rpl14,Rpl17,Rpl19,Rpl24,Rpl26,Rpl27a,Rpl28,Rpl29,Rpl32,Rpl35,Rpl35a,Rpl36,Rpl3l,Rpl4,Rpl6,Rpl8,Rpl9,Rplp0,Rplp2,Rps10,Rps11,Rps12,Rps14,Rps17,Rps18,Rps2,Rps20,Rps21,Rps25,Rps27,Rps28,Rps9,Rpsa	NA	NA	NA	NA	NA	NA	NA	NA	NA	NA
Pathway Commons	Cap-dependent Translation Initiation	7.90235e-223						6.52668e-28					Eif2b1,Eif2b2,Eif2b3,Eif2b4,Eif3a,Eif3b,Eif3d,Eif3h,Eif3j,Eif3k,Eif4a1,Eif4a2,Eif4h,Eif5b,Fau,Gm15427,Rpl10,Rpl13,Rpl14,Rpl17,Rpl19,Rpl24,Rpl26,Rpl27a,Rpl28,Rpl29,Rpl32,Rpl35,Rpl35a,Rpl36,Rpl3l,Rpl4,Rpl6,Rpl8,Rpl9,Rplp0,Rplp2,Rps10,Rps11,Rps12,Rps14,Rps17,Rps18,Rps2,Rps20,Rps21,Rps25,Rps27,Rps28,Rps9,Rpsa	NA	NA	NA	NA	NA	Eif5,Rpl12,Rpl3,Rps19,Rps5,Rps7	NA	NA	NA	NA
Pathway Commons	Developmental Biology	0											Acvr1b,Acvr1c,Adipoq,Agap2,Angptl4,Atf1,Ccnc,Cdk1,Cdk4,Cebpa,Cfl1,Chl1,Cntn2,Cntnap1,Creb1,Csnk2b,Dpysl2,Drap1,Egr2,Ep300,Ephb2,Ezr,Farp2,Fau,Fes,Foxa2,Foxa3,Foxo1,Gck,Gm15427,Gpc1,Hdac3,Itgb1,Klf4,Limk1,Med10,Med11,Med17,Med20,Med21,Med22,Med26,Med29,Med30,Med31,Myl6,Ncoa2,Ncoa3,Neo1,Nkx6-1,Notch1,Nrcam,Onecut1,Pak1,Pdx1,Pip5k1c,Pitpna,Plcg1,Ptprc,Ranbp9,Rela,Rnd1,Rpl10,Rpl13,Rpl14,Rpl17,Rpl19,R…	NA	NA	NA	NA	NA	NA	NA	NA	NA	NA
Pathway Commons	Diabetes pathways	3.83519e-253											Atf4,Exoc2,Exoc5,Exoc8,Fau,Gm15427,Igf1,Igf2bp3,Igfbp4,Kif5b,Klf4,Pdx1,Rpl10,Rpl13,Rpl14,Rpl17,Rpl19,Rpl24,Rpl26,Rpl27a,Rpl28,Rpl29,Rpl32,Rpl35,Rpl35a,Rpl36,Rpl3l,Rpl4,Rpl6,Rpl8,Rpl9,Rplp0,Rplp2,Rps10,Rps11,Rps12,Rps14,Rps17,Rps18,Rps2,Rps20,Rps21,Rps25,Rps27,Rps28,Rps9,Rpsa,Sec11c,Sec61g,Spcs2,Spcs3,Srp14,Srp19,Srp68,Srp9,Ssr1,Ssr2,Ssr3,Tpp1,Tram1	NA	NA	NA	NA	NA	NA	NA	NA	NA	NA
Pathway Commons	Eukaryotic Translation Elongation	3.24885e-177						1.09273e-28					Eef1b2,Eef1g,Eef2,Fau,Gm15427,Rpl10,Rpl13,Rpl14,Rpl17,Rpl19,Rpl24,Rpl26,Rpl27a,Rpl28,Rpl29,Rpl32,Rpl35,Rpl35a,Rpl36,Rpl3l,Rpl4,Rpl6,Rpl8,Rpl9,Rplp0,Rplp2,Rps10,Rps11,Rps12,Rps14,Rps17,Rps18,Rps2,Rps20,Rps21,Rps25,Rps27,Rps28,Rps9,Rpsa	NA	NA	NA	NA	NA	Eef1a1,Rpl12,Rpl3,Rps19,Rps5,Rps7	NA	NA	NA	NA
Pathway Commons	Eukaryotic Translation Initiation	7.90235e-223						6.52668e-28					Eif2b1,Eif2b2,Eif2b3,Eif2b4,Eif3a,Eif3b,Eif3d,Eif3h,Eif3j,Eif3k,Eif4a1,Eif4a2,Eif4h,Eif5b,Fau,Gm15427,Rpl10,Rpl13,Rpl14,Rpl17,Rpl19,Rpl24,Rpl26,Rpl27a,Rpl28,Rpl29,Rpl32,Rpl35,Rpl35a,Rpl36,Rpl3l,Rpl4,Rpl6,Rpl8,Rpl9,Rplp0,Rplp2,Rps10,Rps11,Rps12,Rps14,Rps17,Rps18,Rps2,Rps20,Rps21,Rps25,Rps27,Rps28,Rps9,Rpsa	NA	NA	NA	NA	NA	Eif5,Rpl12,Rpl3,Rps19,Rps5,Rps7	NA	NA	NA	NA
Pathway Commons	Eukaryotic Translation Termination	1.33574e-168						9.32057e-24					Etf1,Fau,Gm15427,Rpl10,Rpl13,Rpl14,Rpl17,Rpl19,Rpl24,Rpl26,Rpl27a,Rpl28,Rpl29,Rpl32,Rpl35,Rpl35a,Rpl36,Rpl3l,Rpl4,Rpl6,Rpl8,Rpl9,Rplp0,Rplp2,Rps10,Rps11,Rps12,Rps14,Rps17,Rps18,Rps2,Rps20,Rps21,Rps25,Rps27,Rps28,Rps9,Rpsa	NA	NA	NA	NA	NA	Rpl12,Rpl3,Rps19,Rps5,Rps7	NA	NA	NA	NA
Pathway Commons	Formation of a pool of free 40S subunits	1.01007e-189											Eif3a,Eif3b,Eif3d,Eif3h,Eif3j,Eif3k,Fau,Gm15427,Rpl10,Rpl13,Rpl14,Rpl17,Rpl19,Rpl24,Rpl26,Rpl27a,Rpl28,Rpl29,Rpl32,Rpl35,Rpl35a,Rpl36,Rpl3l,Rpl4,Rpl6,Rpl8,Rpl9,Rplp0,Rplp2,Rps10,Rps11,Rps12,Rps14,Rps17,Rps18,Rps2,Rps20,Rps21,Rps25,Rps27,Rps28,Rps9,Rpsa	NA	NA	NA	NA	NA	NA	NA	NA	NA	NA
Pathway Commons	Formation of the ternary complex, and subsequently, the 43S complex	9.65118e-95											Eif3a,Eif3b,Eif3d,Eif3h,Eif3j,Eif3k,Fau,Rps10,Rps11,Rps12,Rps14,Rps17,Rps18,Rps2,Rps20,Rps21,Rps25,Rps27,Rps28,Rps9,Rpsa	NA	NA	NA	NA	NA	NA	NA	NA	NA	NA
Pathway Commons	Gene Expression	0						1.62034e-76					Aars,Aars2,Aimp2,Cars2,Ccnc,Ccnt2,Clp1,Cstf2,Ctdp1,Ddx23,Dhx9,Eef1b2,Eef1g,Eef2,Eftud2,Eif2b1,Eif2b2,Eif2b3,Eif2b4,Eif3a,Eif3b,Eif3d,Eif3h,Eif3j,Eif3k,Eif4a1,Eif4a2,Eif4h,Eif5b,Ercc3,Etf1,Farsa,Farsb,Fau,Gars,Gm15427,Gtf2a2,Gtf2b,Gtf2e1,Gtf2h3,Gtf2h4,Hars,Hars2,Hexim1,Hnrnpa0,Hnrnpa1,Hnrnpa3,Hnrnpc,Hnrnpd,Hnrnph2,Hnrnpl,Hnrnpm,Hnrnpu,Lars,Mars,Mars2,Med10,Med17,Med20,Med30,Med31,Nars,Nars2,Ncbp1,…	NA	NA	NA	NA	NA	Aimp1,Eef1a1,Eef1e1,Eif5,Eprs,Gtf2f1,Hnrnpa2b1,Med1,Polr2a,Ptbp1,Rpl12,Rpl3,Rps19,Rps5,Rps7,Srsf2,Txnl4a	NA	NA	NA	NA
Pathway Commons	GTP hydrolysis and joining of the 60S ribosomal subunit	7.34501e-206						4.02482e-28					Eif3a,Eif3b,Eif3d,Eif3h,Eif3j,Eif3k,Eif4a1,Eif4a2,Eif4h,Eif5b,Fau,Gm15427,Rpl10,Rpl13,Rpl14,Rpl17,Rpl19,Rpl24,Rpl26,Rpl27a,Rpl28,Rpl29,Rpl32,Rpl35,Rpl35a,Rpl36,Rpl3l,Rpl4,Rpl6,Rpl8,Rpl9,Rplp0,Rplp2,Rps10,Rps11,Rps12,Rps14,Rps17,Rps18,Rps2,Rps20,Rps21,Rps25,Rps27,Rps28,Rps9,Rpsa	NA	NA	NA	NA	NA	Eif5,Rpl12,Rpl3,Rps19,Rps5,Rps7	NA	NA	NA	NA
Pathway Commons	Influenza Infection	4.25672e-222						2.62025e-42					Calr,Canx,Eif2ak2,Fau,Gm15427,Kpnb1,Nup188,Nup43,Nup50,Nup54,Nup93,Polr2b,Polr2g,Polr2l,Ranbp2,Rpl10,Rpl13,Rpl14,Rpl17,Rpl19,Rpl24,Rpl26,Rpl27a,Rpl28,Rpl29,Rpl32,Rpl35,Rpl35a,Rpl36,Rpl3l,Rpl4,Rpl6,Rpl8,Rpl9,Rplp0,Rplp2,Rps10,Rps11,Rps12,Rps14,Rps17,Rps18,Rps2,Rps20,Rps21,Rps25,Rps27,Rps28,Rps9,Rpsa,Tpr,Xpo1	NA	NA	NA	NA	NA	Gtf2f1,Hsp90aa1,Kpna1,Polr2a,Rpl12,Rpl3,Rps19,Rps5,Rps7	NA	NA	NA	NA
Pathway Commons	Influenza Life Cycle	2.44054e-218						1.9114e-42					Calr,Canx,Fau,Gm15427,Kpnb1,Nup188,Nup43,Nup50,Nup54,Nup93,Polr2b,Polr2g,Polr2l,Ranbp2,Rpl10,Rpl13,Rpl14,Rpl17,Rpl19,Rpl24,Rpl26,Rpl27a,Rpl28,Rpl29,Rpl32,Rpl35,Rpl35a,Rpl36,Rpl3l,Rpl4,Rpl6,Rpl8,Rpl9,Rplp0,Rplp2,Rps10,Rps11,Rps12,Rps14,Rps17,Rps18,Rps2,Rps20,Rps21,Rps25,Rps27,Rps28,Rps9,Rpsa,Tpr,Xpo1	NA	NA	NA	NA	NA	Gtf2f1,Hsp90aa1,Kpna1,Polr2a,Rpl12,Rpl3,Rps19,Rps5,Rps7	NA	NA	NA	NA
Pathway Commons	Influenza Viral RNA Transcription and Replication	4.00239e-174						1.6064e-38					Fau,Gm15427,Polr2b,Polr2g,Polr2l,Rpl10,Rpl13,Rpl14,Rpl17,Rpl19,Rpl24,Rpl26,Rpl27a,Rpl28,Rpl29,Rpl32,Rpl35,Rpl35a,Rpl36,Rpl3l,Rpl4,Rpl6,Rpl8,Rpl9,Rplp0,Rplp2,Rps10,Rps11,Rps12,Rps14,Rps17,Rps18,Rps2,Rps20,Rps21,Rps25,Rps27,Rps28,Rps9,Rpsa	NA	NA	NA	NA	NA	Gtf2f1,Hsp90aa1,Polr2a,Rpl12,Rpl3,Rps19,Rps5,Rps7	NA	NA	NA	NA
Pathway Commons	Insulin Synthesis and Processing	2.34801e-233											Exoc2,Exoc5,Exoc8,Fau,Gm15427,Kif5b,Pdx1,Rpl10,Rpl13,Rpl14,Rpl17,Rpl19,Rpl24,Rpl26,Rpl27a,Rpl28,Rpl29,Rpl32,Rpl35,Rpl35a,Rpl36,Rpl3l,Rpl4,Rpl6,Rpl8,Rpl9,Rplp0,Rplp2,Rps10,Rps11,Rps12,Rps14,Rps17,Rps18,Rps2,Rps20,Rps21,Rps25,Rps27,Rps28,Rps9,Rpsa,Sec11c,Sec61g,Spcs2,Spcs3,Srp14,Srp19,Srp68,Srp9,Ssr1,Ssr2,Ssr3,Tram1	NA	NA	NA	NA	NA	NA	NA	NA	NA	NA
Pathway Commons	L13a-mediated translational silencing of Ceruloplasmin expression	2.04123e-201											Eif3a,Eif3b,Eif3d,Eif3h,Eif3j,Eif3k,Eif4a1,Eif4a2,Eif4h,Fau,Gm15427,Rpl10,Rpl13,Rpl14,Rpl17,Rpl19,Rpl24,Rpl26,Rpl27a,Rpl28,Rpl29,Rpl32,Rpl35,Rpl35a,Rpl36,Rpl3l,Rpl4,Rpl6,Rpl8,Rpl9,Rplp0,Rplp2,Rps10,Rps11,Rps12,Rps14,Rps17,Rps18,Rps2,Rps20,Rps21,Rps25,Rps27,Rps28,Rps9,Rpsa	NA	NA	NA	NA	NA	NA	NA	NA	NA	NA
Pathway Commons	Metabolism	0											Acly,Aco2,Ada,Adi1,Aldh1a1,Aldh2,Aldh9a1,Amd2,Anapc10,Anapc11,Anapc4,Anapc5,Anapc7,Apip,Aprt,Asl,Atic,Atp5a1,Atp5b,Atp5d,Atp5g1,Atp5h,Atp5j,BC096441,Bsg,Cda,Cdc26,Cdx2,Cmpk1,Cnot2,Cnot3,Coasy,Cox4i1,Cox5a,Cox5b,Cox6b1,Cox7a2l,Cox7b,Cox7c,Cs,Cyb5r3,Cyp11a1,Cyp27b1,Cyp2e1,Cyp39a1,Cyp46a1,D2hgdh,Dbh,Dck,Dcp1b,Dcp2,Ddx6,Dguok,Dio3,Dlat,Edc4,Elavl1,Enoph1,Etf1,Etfb,Etfdh,Exosc3,Exosc6,Exosc7,Fasn,Fau,…	NA	NA	NA	NA	NA	NA	NA	NA	NA	NA
Pathway Commons	Metabolism of mRNA	0											Anapc10,Anapc11,Anapc4,Anapc5,Anapc7,BC096441,Cdc26,Cnot2,Cnot3,Dcp1b,Dcp2,Ddx6,Edc4,Elavl1,Etf1,Exosc3,Exosc6,Exosc7,Fau,Gm15427,Hspa8,Lsm1,Lsm4,Mapkapk2,Ncbp1,Parn,Ppp2ca,Ppp2r1a,Prkcd,Psma2,Psma6,Psma7,Psma8,Psmb1,Psmb3,Psmc1,Psmc2,Psmc4,Psmc5,Psmc6,Psmd1,Psmd11,Psmd12,Psmd13,Psmd2,Psmd7,Psmd8,Psme4,Rnps1,Rpl10,Rpl13,Rpl14,Rpl17,Rpl19,Rpl24,Rpl26,Rpl27a,Rpl28,Rpl29,Rpl32,Rpl35,Rpl35a,Rpl36,Rpl…	NA	NA	NA	NA	NA	NA	NA	NA	NA	NA
Pathway Commons	Metabolism of proteins	0											Alg1,Calr,Canx,Cct4,Cct5,Cct6a,Cct7,Cct8,Dolk,Dpm1,Dpm2,Dpm3,Eef1b2,Eef1g,Eef2,Eif2b1,Eif2b2,Eif2b3,Eif2b4,Eif3a,Eif3b,Eif3d,Eif3h,Eif3j,Eif3k,Eif4a1,Eif4a2,Eif4h,Eif5b,Etf1,Fau,Gm15427,Gnpnat1,Lman1,Man1b1,Mcfd2,Mgat2,Mgat5,Mlec,Mogs,Notch3,Pfdn1,Pfdn2,Pgm3,Pigg,Pigm,Pigs,Pigu,Pigx,Plaur,Preb,Rft1,Rpl10,Rpl13,Rpl14,Rpl17,Rpl19,Rpl24,Rpl26,Rpl27a,Rpl28,Rpl29,Rpl32,Rpl35,Rpl35a,Rpl36,Rpl3l,Rpl4,Rp…	NA	NA	NA	NA	NA	NA	NA	NA	NA	NA
Pathway Commons	Metabolism of RNA	0											Anapc10,Anapc11,Anapc4,Anapc5,Anapc7,BC096441,Cdc26,Cnot2,Cnot3,Dcp1b,Dcp2,Ddx6,Edc4,Elavl1,Etf1,Exosc3,Exosc6,Exosc7,Fau,Gemin4,Gemin6,Gemin7,Gm15427,Hspa8,Lsm1,Lsm4,Mapkapk2,Ncbp1,Nup188,Nup43,Nup50,Nup54,Nup93,Parn,Phax,Ppp2ca,Ppp2r1a,Prkcd,Psma2,Psma6,Psma7,Psma8,Psmb1,Psmb3,Psmc1,Psmc2,Psmc4,Psmc5,Psmc6,Psmd1,Psmd11,Psmd12,Psmd13,Psmd2,Psmd7,Psmd8,Psme4,Ranbp2,Rnps1,Rpl10,Rpl13,Rpl14,Rpl17,R…	NA	NA	NA	NA	NA	NA	NA	NA	NA	NA
Pathway Commons	Nonsense-Mediated Decay	2.04123e-201											Etf1,Fau,Gm15427,Ncbp1,Ppp2ca,Ppp2r1a,Rnps1,Rpl10,Rpl13,Rpl14,Rpl17,Rpl19,Rpl24,Rpl26,Rpl27a,Rpl28,Rpl29,Rpl32,Rpl35,Rpl35a,Rpl36,Rpl3l,Rpl4,Rpl6,Rpl8,Rpl9,Rplp0,Rplp2,Rps10,Rps11,Rps12,Rps14,Rps17,Rps18,Rps2,Rps20,Rps21,Rps25,Rps27,Rps28,Rps9,Rpsa,Smg5,Smg6,Smg7,Upf2	NA	NA	NA	NA	NA	NA	NA	NA	NA	NA
Pathway Commons	Nonsense Mediated Decay Enhanced by the Exon Junction Complex	2.04123e-201											Etf1,Fau,Gm15427,Ncbp1,Ppp2ca,Ppp2r1a,Rnps1,Rpl10,Rpl13,Rpl14,Rpl17,Rpl19,Rpl24,Rpl26,Rpl27a,Rpl28,Rpl29,Rpl32,Rpl35,Rpl35a,Rpl36,Rpl3l,Rpl4,Rpl6,Rpl8,Rpl9,Rplp0,Rplp2,Rps10,Rps11,Rps12,Rps14,Rps17,Rps18,Rps2,Rps20,Rps21,Rps25,Rps27,Rps28,Rps9,Rpsa,Smg5,Smg6,Smg7,Upf2	NA	NA	NA	NA	NA	NA	NA	NA	NA	NA
Pathway Commons	Nonsense Mediated Decay Independent of the Exon Junction Complex	5.95547e-172											Etf1,Fau,Gm15427,Ncbp1,Rpl10,Rpl13,Rpl14,Rpl17,Rpl19,Rpl24,Rpl26,Rpl27a,Rpl28,Rpl29,Rpl32,Rpl35,Rpl35a,Rpl36,Rpl3l,Rpl4,Rpl6,Rpl8,Rpl9,Rplp0,Rplp2,Rps10,Rps11,Rps12,Rps14,Rps17,Rps18,Rps2,Rps20,Rps21,Rps25,Rps27,Rps28,Rps9,Rpsa	NA	NA	NA	NA	NA	NA	NA	NA	NA	NA
Pathway Commons	Peptide chain elongation	1.33574e-168						8.26897e-29					Eef2,Fau,Gm15427,Rpl10,Rpl13,Rpl14,Rpl17,Rpl19,Rpl24,Rpl26,Rpl27a,Rpl28,Rpl29,Rpl32,Rpl35,Rpl35a,Rpl36,Rpl3l,Rpl4,Rpl6,Rpl8,Rpl9,Rplp0,Rplp2,Rps10,Rps11,Rps12,Rps14,Rps17,Rps18,Rps2,Rps20,Rps21,Rps25,Rps27,Rps28,Rps9,Rpsa	NA	NA	NA	NA	NA	Eef1a1,Rpl12,Rpl3,Rps19,Rps5,Rps7	NA	NA	NA	NA
Pathway Commons	Regulation of beta-cell development	3.57576e-201											Creb1,Fau,Foxa2,Foxa3,Foxo1,Gck,Gm15427,Nkx6-1,Notch1,Onecut1,Pdx1,Rpl10,Rpl13,Rpl14,Rpl17,Rpl19,Rpl24,Rpl26,Rpl27a,Rpl28,Rpl29,Rpl32,Rpl35,Rpl35a,Rpl36,Rpl3l,Rpl4,Rpl6,Rpl8,Rpl9,Rplp0,Rplp2,Rps10,Rps11,Rps12,Rps14,Rps17,Rps18,Rps2,Rps20,Rps21,Rps25,Rps27,Rps28,Rps9,Rpsa	NA	NA	NA	NA	NA	NA	NA	NA	NA	NA
Pathway Commons	Regulation of gene expression in beta cells	6.90871e-194											Creb1,Fau,Foxa2,Foxa3,Foxo1,Gck,Gm15427,Nkx6-1,Pdx1,Rpl10,Rpl13,Rpl14,Rpl17,Rpl19,Rpl24,Rpl26,Rpl27a,Rpl28,Rpl29,Rpl32,Rpl35,Rpl35a,Rpl36,Rpl3l,Rpl4,Rpl6,Rpl8,Rpl9,Rplp0,Rplp2,Rps10,Rps11,Rps12,Rps14,Rps17,Rps18,Rps2,Rps20,Rps21,Rps25,Rps27,Rps28,Rps9,Rpsa	NA	NA	NA	NA	NA	NA	NA	NA	NA	NA
Pathway Commons	Respiratory electron transport	1.44818e-162											Cox4i1,Cox5a,Cox5b,Cox6b1,Cox7a2l,Cox7b,Cox7c,Etfb,Etfdh,Ndufa10,Ndufa11,Ndufa12,Ndufa6,Ndufa7,Ndufa9,Ndufb10,Ndufb2,Ndufb3,Ndufb6,Ndufb7,Ndufb8,Ndufb9,Ndufc1,Ndufs1,Ndufs2,Ndufs3,Ndufs7,Ndufs8,Ndufv2,Ndufv3,Sdha,Sdhc,Sdhd,Uqcr10,Uqcr11,Uqcrb,Uqcrh,Uqcrq	NA	NA	NA	NA	NA	NA	NA	NA	NA	NA
Pathway Commons	Respiratory electron transport, ATP synthesis by chemiosmotic coupling, and heat production by uncoupling proteins.	1.22846e-187											Atp5a1,Atp5b,Atp5d,Atp5g1,Atp5h,Atp5j,Cox4i1,Cox5a,Cox5b,Cox6b1,Cox7a2l,Cox7b,Cox7c,Etfb,Etfdh,Ndufa10,Ndufa11,Ndufa12,Ndufa6,Ndufa7,Ndufa9,Ndufb10,Ndufb2,Ndufb3,Ndufb6,Ndufb7,Ndufb8,Ndufb9,Ndufc1,Ndufs1,Ndufs2,Ndufs3,Ndufs7,Ndufs8,Ndufv2,Ndufv3,Sdha,Sdhc,Sdhd,Uqcr10,Uqcr11,Uqcrb,Uqcrh,Uqcrq	NA	NA	NA	NA	NA	NA	NA	NA	NA	NA
Pathway Commons	Ribosomal scanning and start codon recognition	5.05923e-107											Eif3a,Eif3b,Eif3d,Eif3h,Eif3j,Eif3k,Eif4a1,Eif4a2,Eif4h,Fau,Rps10,Rps11,Rps12,Rps14,Rps17,Rps18,Rps2,Rps20,Rps21,Rps25,Rps27,Rps28,Rps9,Rpsa	NA	NA	NA	NA	NA	NA	NA	NA	NA	NA
Pathway Commons	The citric acid (TCA) cycle and respiratory electron transport	6.0335e-229											Aco2,Atp5a1,Atp5b,Atp5d,Atp5g1,Atp5h,Atp5j,Bsg,Cox4i1,Cox5a,Cox5b,Cox6b1,Cox7a2l,Cox7b,Cox7c,Cs,D2hgdh,Dlat,Etfb,Etfdh,Idh2,L2hgdh,Mdh2,Ndufa10,Ndufa11,Ndufa12,Ndufa6,Ndufa7,Ndufa9,Ndufb10,Ndufb2,Ndufb3,Ndufb6,Ndufb7,Ndufb8,Ndufb9,Ndufc1,Ndufs1,Ndufs2,Ndufs3,Ndufs7,Ndufs8,Ndufv2,Ndufv3,Pdhx,Sdha,Sdhc,Sdhd,Suclg2,Uqcr10,Uqcr11,Uqcrb,Uqcrh,Uqcrq	NA	NA	NA	NA	NA	NA	NA	NA	NA	NA
Pathway Commons	Translation	8.66303e-240						1.12925e-32					Eef1b2,Eef1g,Eef2,Eif2b1,Eif2b2,Eif2b3,Eif2b4,Eif3a,Eif3b,Eif3d,Eif3h,Eif3j,Eif3k,Eif4a1,Eif4a2,Eif4h,Eif5b,Etf1,Fau,Gm15427,Rpl10,Rpl13,Rpl14,Rpl17,Rpl19,Rpl24,Rpl26,Rpl27a,Rpl28,Rpl29,Rpl32,Rpl35,Rpl35a,Rpl36,Rpl3l,Rpl4,Rpl6,Rpl8,Rpl9,Rplp0,Rplp2,Rps10,Rps11,Rps12,Rps14,Rps17,Rps18,Rps2,Rps20,Rps21,Rps25,Rps27,Rps28,Rps9,Rpsa	NA	NA	NA	NA	NA	Eef1a1,Eif5,Rpl12,Rpl3,Rps19,Rps5,Rps7	NA	NA	NA	NA
Pathway Commons	Translation initiation complex formation	5.05923e-107											Eif3a,Eif3b,Eif3d,Eif3h,Eif3j,Eif3k,Eif4a1,Eif4a2,Eif4h,Fau,Rps10,Rps11,Rps12,Rps14,Rps17,Rps18,Rps2,Rps20,Rps21,Rps25,Rps27,Rps28,Rps9,Rpsa	NA	NA	NA	NA	NA	NA	NA	NA	NA	NA
Pathway Commons	Trk receptor signaling mediated by PI3K and PLC-gamma	2.25895e-102											Agap2,Bad,Camk2a,Ccnd1,Creb1,Egr1,Ehd4,Elk1,Fos,Gsk3b,Map3k2,Mapk14,Mapk7,Mapkapk2,Mef2c,Pdpk1,Pik3ca,Pik3r1,Plcg1,Prkcd,Rit1,Rps6ka1,Sos1,Srf	NA	NA	NA	NA	NA	NA	NA	NA	NA	NA
Pathway Commons	Viral mRNA Translation	7.01901e-164						9.32057e-24					Fau,Gm15427,Rpl10,Rpl13,Rpl14,Rpl17,Rpl19,Rpl24,Rpl26,Rpl27a,Rpl28,Rpl29,Rpl32,Rpl35,Rpl35a,Rpl36,Rpl3l,Rpl4,Rpl6,Rpl8,Rpl9,Rplp0,Rplp2,Rps10,Rps11,Rps12,Rps14,Rps17,Rps18,Rps2,Rps20,Rps21,Rps25,Rps27,Rps28,Rps9,Rpsa	NA	NA	NA	NA	NA	Rpl12,Rpl3,Rps19,Rps5,Rps7	NA	NA	NA	NA
GO Biological Process	cellular component assembly		6.00807e-221										NA	1110017D15Rik,Asf1a,Asf1b,Baiap2l2,Capn3,Chn2,Col6a1,Col6a4,Fgd3,H2afv,Hist1h1c,Hist1h2ab,Hist1h2ac,Hist1h2ae,Hist1h2af,Hist1h2ag,Hist1h2ak,Hist1h2an,Hist1h2ap,Hist1h2bb,Hist1h2bc,Hist1h2be,Hist1h2bf,Hist1h2bg,Hist1h2bj,Hist1h2bk,Hist1h2bl,Hist1h2bm,Hist1h2bn,Hist1h2bp,Hist1h3b,Hist1h3c,Hist1h3d,Hist1h3g,Hist1h3h,Hist1h3i,Hist1h4a,Hist1h4n,Hist2h3b,Hist2h3c1,Hp1bp3,Hsp90b1,Klf5,Nck1,Ncor1,Psen1,Q…	NA	NA	NA	NA	NA	NA	NA	NA	NA
GO Biological Process	cellular component assembly at cellular level		1.69346e-199					2.6856e-104					NA	1110017D15Rik,Asf1a,Asf1b,Baiap2l2,Capn3,Chn2,Fgd3,H2afv,Hist1h1c,Hist1h2ab,Hist1h2ac,Hist1h2ae,Hist1h2af,Hist1h2ag,Hist1h2ak,Hist1h2an,Hist1h2ap,Hist1h2bb,Hist1h2bc,Hist1h2be,Hist1h2bf,Hist1h2bg,Hist1h2bj,Hist1h2bk,Hist1h2bl,Hist1h2bm,Hist1h2bn,Hist1h2bp,Hist1h3b,Hist1h3c,Hist1h3d,Hist1h3g,Hist1h3h,Hist1h3i,Hist1h4a,Hist1h4n,Hist2h3b,Hist2h3c1,Hp1bp3,Hsp90b1,Klf5,Nck1,Ncor1,Psen1,Tex15,Tymp	NA	NA	NA	NA	Cenpv,Cirbp,H2afx,H3f3a,H3f3b,Hist1h1t,Hist1h2ah,Hist1h2ai,Hist1h2bh,Hist1h3a,Hist1h3e,Hist1h3f,Hist1h4c,Hist1h4d,Hist1h4h,Hist1h4i,Hist1h4k,Hsp90aa1,Hspa4,Nlgn2,Rb1cc1,Rcc1,Tgfbr3,Tuba3a	NA	NA	NA	NA
GO Biological Process	cellular component biogenesis		3.87306e-246										NA	1110017D15Rik,Asf1a,Asf1b,Baiap2l2,Capn3,Chn2,Clip3,Col6a1,Col6a4,Dis3,Eif4a3,Exosc4,Fgd3,H2afv,Hist1h1c,Hist1h2ab,Hist1h2ac,Hist1h2ae,Hist1h2af,Hist1h2ag,Hist1h2ak,Hist1h2an,Hist1h2ap,Hist1h2bb,Hist1h2bc,Hist1h2be,Hist1h2bf,Hist1h2bg,Hist1h2bj,Hist1h2bk,Hist1h2bl,Hist1h2bm,Hist1h2bn,Hist1h2bp,Hist1h3b,Hist1h3c,Hist1h3d,Hist1h3g,Hist1h3h,Hist1h3i,Hist1h4a,Hist1h4n,Hist2h3b,Hist2h3c1,Hp1bp3,Hsp90b…	NA	NA	NA	NA	NA	NA	NA	NA	NA
GO Biological Process	cellular macromolecular complex assembly		4.38024e-163					2.45256e-96					NA	1110017D15Rik,Asf1a,Asf1b,H2afv,Hist1h1c,Hist1h2ab,Hist1h2ac,Hist1h2ae,Hist1h2af,Hist1h2ag,Hist1h2ak,Hist1h2an,Hist1h2ap,Hist1h2bb,Hist1h2bc,Hist1h2be,Hist1h2bf,Hist1h2bg,Hist1h2bj,Hist1h2bk,Hist1h2bl,Hist1h2bm,Hist1h2bn,Hist1h2bp,Hist1h3b,Hist1h3c,Hist1h3d,Hist1h3g,Hist1h3h,Hist1h3i,Hist1h4a,Hist1h4n,Hist2h3b,Hist2h3c1,Hp1bp3,Tymp	NA	NA	NA	NA	Cenpv,Cirbp,H2afx,H3f3a,H3f3b,Hist1h1t,Hist1h2ah,Hist1h2ai,Hist1h2bh,Hist1h3a,Hist1h3e,Hist1h3f,Hist1h4c,Hist1h4d,Hist1h4h,Hist1h4i,Hist1h4k,Hsp90aa1,Hspa4,Tgfbr3,Tuba3a	NA	NA	NA	NA
GO Biological Process	cellular macromolecular complex subunit organization		1.7923e-171					1.76135e-95					NA	1110017D15Rik,Asf1a,Asf1b,H2afv,Hist1h1c,Hist1h2ab,Hist1h2ac,Hist1h2ae,Hist1h2af,Hist1h2ag,Hist1h2ak,Hist1h2an,Hist1h2ap,Hist1h2bb,Hist1h2bc,Hist1h2be,Hist1h2bf,Hist1h2bg,Hist1h2bj,Hist1h2bk,Hist1h2bl,Hist1h2bm,Hist1h2bn,Hist1h2bp,Hist1h3b,Hist1h3c,Hist1h3d,Hist1h3g,Hist1h3h,Hist1h3i,Hist1h4a,Hist1h4n,Hist2h3b,Hist2h3c1,Hp1bp3,Seh1l,Tymp,Wasl	NA	NA	NA	NA	Cenpv,Cirbp,H2afx,H3f3a,H3f3b,Hist1h1t,Hist1h2ah,Hist1h2ai,Hist1h2bh,Hist1h3a,Hist1h3e,Hist1h3f,Hist1h4c,Hist1h4d,Hist1h4h,Hist1h4i,Hist1h4k,Hsp90aa1,Hspa4,Tgfbr3,Tuba3a	NA	NA	NA	NA
GO Biological Process	chromatin assembly		1.30165e-166					8.7736e-78					NA	Asf1a,Asf1b,H2afv,Hist1h1c,Hist1h2ab,Hist1h2ac,Hist1h2ae,Hist1h2af,Hist1h2ag,Hist1h2ak,Hist1h2an,Hist1h2ap,Hist1h2bb,Hist1h2bc,Hist1h2be,Hist1h2bf,Hist1h2bg,Hist1h2bj,Hist1h2bk,Hist1h2bl,Hist1h2bm,Hist1h2bn,Hist1h2bp,Hist1h3b,Hist1h3c,Hist1h3d,Hist1h3g,Hist1h3h,Hist1h3i,Hist1h4a,Hist1h4n,Hist2h3b,Hist2h3c1,Hp1bp3	NA	NA	NA	NA	Cenpv,H2afx,H3f3a,H3f3b,Hist1h1t,Hist1h2ah,Hist1h2ai,Hist1h2bh,Hist1h3a,Hist1h3e,Hist1h3f,Hist1h4c,Hist1h4d,Hist1h4h,Hist1h4i,Hist1h4k	NA	NA	NA	NA
GO Biological Process	chromatin assembly or disassembly		7.66124e-166					1.97237e-77					NA	Asf1a,Asf1b,H2afv,Hist1h1c,Hist1h2ab,Hist1h2ac,Hist1h2ae,Hist1h2af,Hist1h2ag,Hist1h2ak,Hist1h2an,Hist1h2ap,Hist1h2bb,Hist1h2bc,Hist1h2be,Hist1h2bf,Hist1h2bg,Hist1h2bj,Hist1h2bk,Hist1h2bl,Hist1h2bm,Hist1h2bn,Hist1h2bp,Hist1h3b,Hist1h3c,Hist1h3d,Hist1h3g,Hist1h3h,Hist1h3i,Hist1h4a,Hist1h4n,Hist2h3b,Hist2h3c1,Hp1bp3	NA	NA	NA	NA	Cenpv,H2afx,H3f3a,H3f3b,Hist1h1t,Hist1h2ah,Hist1h2ai,Hist1h2bh,Hist1h3a,Hist1h3e,Hist1h3f,Hist1h4c,Hist1h4d,Hist1h4h,Hist1h4i,Hist1h4k	NA	NA	NA	NA
GO Biological Process	chromatin organization		3.84674e-191					8.59055e-98					NA	Actl6a,Asf1a,Asf1b,H2afv,Hist1h1c,Hist1h2ab,Hist1h2ac,Hist1h2ae,Hist1h2af,Hist1h2ag,Hist1h2ak,Hist1h2an,Hist1h2ap,Hist1h2bb,Hist1h2bc,Hist1h2be,Hist1h2bf,Hist1h2bg,Hist1h2bj,Hist1h2bk,Hist1h2bl,Hist1h2bm,Hist1h2bn,Hist1h2bp,Hist1h3b,Hist1h3c,Hist1h3d,Hist1h3g,Hist1h3h,Hist1h3i,Hist1h4a,Hist1h4n,Hist2h3b,Hist2h3c1,Hp1bp3,Map3k12,Msl2,Ncor1,Npcd,Rps6ka5,Utp3,Wdr82	NA	NA	NA	NA	Banp,Brdt,Cenpv,Ehmt1,H2afx,H3f3a,H3f3b,Hist1h1t,Hist1h2ah,Hist1h2ai,Hist1h2bh,Hist1h3a,Hist1h3e,Hist1h3f,Hist1h4c,Hist1h4d,Hist1h4h,Hist1h4i,Hist1h4k,Jmjd6,Skp1a,Smyd2	NA	NA	NA	NA
GO Biological Process	chromosome organization		5.26046e-211					8.20695e-120					NA	Actl6a,Asf1a,Asf1b,H2afv,Hist1h1c,Hist1h2ab,Hist1h2ac,Hist1h2ae,Hist1h2af,Hist1h2ag,Hist1h2ak,Hist1h2an,Hist1h2ap,Hist1h2bb,Hist1h2bc,Hist1h2be,Hist1h2bf,Hist1h2bg,Hist1h2bj,Hist1h2bk,Hist1h2bl,Hist1h2bm,Hist1h2bn,Hist1h2bp,Hist1h3b,Hist1h3c,Hist1h3d,Hist1h3g,Hist1h3h,Hist1h3i,Hist1h4a,Hist1h4n,Hist2h3b,Hist2h3c1,Hp1bp3,Map3k12,Msl2,Ncapd3,Ncapg2,Ncor1,Npcd,Rps6ka5,Rrs1,Seh1l,Tex15,Utp3,Wdr82	NA	NA	NA	NA	Banp,Brdt,Cenpv,Ehmt1,Fbxw7,H2afx,H3f3a,H3f3b,Hist1h1t,Hist1h2ah,Hist1h2ai,Hist1h2bh,Hist1h3a,Hist1h3e,Hist1h3f,Hist1h4c,Hist1h4d,Hist1h4h,Hist1h4i,Hist1h4k,Jmjd6,Ncapd2,Skp1a,Smyd2,Zscan4c,Zscan4d,Zscan4f	NA	NA	NA	NA
GO Biological Process	DNA conformation change		4.54118e-177					1.56765e-80					NA	Asf1a,Asf1b,H2afv,Hist1h1c,Hist1h2ab,Hist1h2ac,Hist1h2ae,Hist1h2af,Hist1h2ag,Hist1h2ak,Hist1h2an,Hist1h2ap,Hist1h2bb,Hist1h2bc,Hist1h2be,Hist1h2bf,Hist1h2bg,Hist1h2bj,Hist1h2bk,Hist1h2bl,Hist1h2bm,Hist1h2bn,Hist1h2bp,Hist1h3b,Hist1h3c,Hist1h3d,Hist1h3g,Hist1h3h,Hist1h3i,Hist1h4a,Hist1h4n,Hist2h3b,Hist2h3c1,Hp1bp3,Mcm4,Ncapd3,Ncapg2	NA	NA	NA	NA	Cenpv,H2afx,H3f3a,H3f3b,Hist1h1t,Hist1h2ah,Hist1h2ai,Hist1h2bh,Hist1h3a,Hist1h3e,Hist1h3f,Hist1h4c,Hist1h4d,Hist1h4h,Hist1h4i,Hist1h4k,Ncapd2	NA	NA	NA	NA
GO Biological Process	DNA metabolic process		7.22965e-185					3.02517e-128					NA	Actl6a,Apobec3,Asf1a,Asf1b,Endog,Exosc4,Fhit,H2afv,Hist1h1c,Hist1h2ab,Hist1h2ac,Hist1h2ae,Hist1h2af,Hist1h2ag,Hist1h2ak,Hist1h2an,Hist1h2ap,Hist1h2bb,Hist1h2bc,Hist1h2be,Hist1h2bf,Hist1h2bg,Hist1h2bj,Hist1h2bk,Hist1h2bl,Hist1h2bm,Hist1h2bn,Hist1h2bp,Hist1h3b,Hist1h3c,Hist1h3d,Hist1h3g,Hist1h3h,Hist1h3i,Hist1h4a,Hist1h4n,Hist2h3b,Hist2h3c1,Hp1bp3,Mcm4,Mcm9,Ncapd3,Ncapg2	NA	NA	NA	NA	Aicda,Apobec1,Cenpv,Eef1e1,Ehmt1,H2afx,H3f3a,H3f3b,Hist1h1t,Hist1h2ah,Hist1h2ai,Hist1h2bh,Hist1h3a,Hist1h3e,Hist1h3f,Hist1h4c,Hist1h4d,Hist1h4h,Hist1h4i,Hist1h4k,Med1,Ncapd2,Obfc2a,Polg2,Sfpq,Tipin,Zscan4c,Zscan4d,Zscan4f	NA	NA	NA	NA
GO Biological Process	DNA packaging		1.16076e-173					2.21215e-81					NA	Asf1a,Asf1b,H2afv,Hist1h1c,Hist1h2ab,Hist1h2ac,Hist1h2ae,Hist1h2af,Hist1h2ag,Hist1h2ak,Hist1h2an,Hist1h2ap,Hist1h2bb,Hist1h2bc,Hist1h2be,Hist1h2bf,Hist1h2bg,Hist1h2bj,Hist1h2bk,Hist1h2bl,Hist1h2bm,Hist1h2bn,Hist1h2bp,Hist1h3b,Hist1h3c,Hist1h3d,Hist1h3g,Hist1h3h,Hist1h3i,Hist1h4a,Hist1h4n,Hist2h3b,Hist2h3c1,Hp1bp3,Ncapd3,Ncapg2	NA	NA	NA	NA	Cenpv,H2afx,H3f3a,H3f3b,Hist1h1t,Hist1h2ah,Hist1h2ai,Hist1h2bh,Hist1h3a,Hist1h3e,Hist1h3f,Hist1h4c,Hist1h4d,Hist1h4h,Hist1h4i,Hist1h4k,Ncapd2	NA	NA	NA	NA
GO Biological Process	macromolecular complex assembly		2.71784e-182					3.62602e-110					NA	1110017D15Rik,Asf1a,Asf1b,Col6a1,Col6a4,H2afv,Hist1h1c,Hist1h2ab,Hist1h2ac,Hist1h2ae,Hist1h2af,Hist1h2ag,Hist1h2ak,Hist1h2an,Hist1h2ap,Hist1h2bb,Hist1h2bc,Hist1h2be,Hist1h2bf,Hist1h2bg,Hist1h2bj,Hist1h2bk,Hist1h2bl,Hist1h2bm,Hist1h2bn,Hist1h2bp,Hist1h3b,Hist1h3c,Hist1h3d,Hist1h3g,Hist1h3h,Hist1h3i,Hist1h4a,Hist1h4n,Hist2h3b,Hist2h3c1,Hp1bp3,Qprt,Sharpin,Stx4a,Tymp,Wasl	NA	NA	NA	NA	Acvrl1,Cat,Cenpv,Cirbp,Col6a2,H2afx,H3f3a,H3f3b,Hist1h1t,Hist1h2ah,Hist1h2ai,Hist1h2bh,Hist1h3a,Hist1h3e,Hist1h3f,Hist1h4c,Hist1h4d,Hist1h4h,Hist1h4i,Hist1h4k,Hsp90aa1,Hspa4,Tgfbr3,Trim72,Tuba3a	NA	NA	NA	NA
GO Biological Process	macromolecular complex subunit organization		2.47507e-195					3.02867e-114					NA	1110017D15Rik,Abcg1,Asf1a,Asf1b,Col6a1,Col6a4,H2afv,Hist1h1c,Hist1h2ab,Hist1h2ac,Hist1h2ae,Hist1h2af,Hist1h2ag,Hist1h2ak,Hist1h2an,Hist1h2ap,Hist1h2bb,Hist1h2bc,Hist1h2be,Hist1h2bf,Hist1h2bg,Hist1h2bj,Hist1h2bk,Hist1h2bl,Hist1h2bm,Hist1h2bn,Hist1h2bp,Hist1h3b,Hist1h3c,Hist1h3d,Hist1h3g,Hist1h3h,Hist1h3i,Hist1h4a,Hist1h4n,Hist2h3b,Hist2h3c1,Hp1bp3,Lcat,Qprt,Seh1l,Sharpin,Stx4a,Tymp,Wasl	NA	NA	NA	NA	Acvrl1,Cat,Cenpv,Cirbp,Col6a2,Ddit4,H2afx,H3f3a,H3f3b,Hist1h1t,Hist1h2ah,Hist1h2ai,Hist1h2bh,Hist1h3a,Hist1h3e,Hist1h3f,Hist1h4c,Hist1h4d,Hist1h4h,Hist1h4i,Hist1h4k,Hsp90aa1,Hspa4,Tgfbr3,Trim72,Tuba3a	NA	NA	NA	NA
GO Biological Process	nucleosome assembly		6.52568e-168					4.28531e-73					NA	Asf1a,Asf1b,H2afv,Hist1h1c,Hist1h2ab,Hist1h2ac,Hist1h2ae,Hist1h2af,Hist1h2ag,Hist1h2ak,Hist1h2an,Hist1h2ap,Hist1h2bb,Hist1h2bc,Hist1h2be,Hist1h2bf,Hist1h2bg,Hist1h2bj,Hist1h2bk,Hist1h2bl,Hist1h2bm,Hist1h2bn,Hist1h2bp,Hist1h3b,Hist1h3c,Hist1h3d,Hist1h3g,Hist1h3h,Hist1h3i,Hist1h4a,Hist1h4n,Hist2h3b,Hist2h3c1,Hp1bp3	NA	NA	NA	NA	H2afx,H3f3a,H3f3b,Hist1h1t,Hist1h2ah,Hist1h2ai,Hist1h2bh,Hist1h3a,Hist1h3e,Hist1h3f,Hist1h4c,Hist1h4d,Hist1h4h,Hist1h4i,Hist1h4k	NA	NA	NA	NA
GO Biological Process	nucleosome organization		3.47943e-167					8.94458e-73					NA	Asf1a,Asf1b,H2afv,Hist1h1c,Hist1h2ab,Hist1h2ac,Hist1h2ae,Hist1h2af,Hist1h2ag,Hist1h2ak,Hist1h2an,Hist1h2ap,Hist1h2bb,Hist1h2bc,Hist1h2be,Hist1h2bf,Hist1h2bg,Hist1h2bj,Hist1h2bk,Hist1h2bl,Hist1h2bm,Hist1h2bn,Hist1h2bp,Hist1h3b,Hist1h3c,Hist1h3d,Hist1h3g,Hist1h3h,Hist1h3i,Hist1h4a,Hist1h4n,Hist2h3b,Hist2h3c1,Hp1bp3	NA	NA	NA	NA	H2afx,H3f3a,H3f3b,Hist1h1t,Hist1h2ah,Hist1h2ai,Hist1h2bh,Hist1h3a,Hist1h3e,Hist1h3f,Hist1h4c,Hist1h4d,Hist1h4h,Hist1h4i,Hist1h4k	NA	NA	NA	NA
GO Biological Process	organelle organization		8.1079599998738e-314					1.13404e-191					NA	6720463M24Rik,Actl6a,Aktip,Asf1a,Asf1b,Bbc3,Bcar1,Capn3,Chchd3,Clvs1,Cntrob,Daam1,Dsn1,Fam83d,Fig4,Fsd1,H2afv,Hist1h1c,Hist1h2ab,Hist1h2ac,Hist1h2ae,Hist1h2af,Hist1h2ag,Hist1h2ak,Hist1h2an,Hist1h2ap,Hist1h2bb,Hist1h2bc,Hist1h2be,Hist1h2bf,Hist1h2bg,Hist1h2bj,Hist1h2bk,Hist1h2bl,Hist1h2bm,Hist1h2bn,Hist1h2bp,Hist1h3b,Hist1h3c,Hist1h3d,Hist1h3g,Hist1h3h,Hist1h3i,Hist1h4a,Hist1h4n,Hist2h3b,Hist2h3c1…	NA	NA	NA	NA	Banp,Brdt,Cenpv,Cltc,Dctn2,Ehmt1,Fbxw7,Ftcd,H2afx,H3f3a,H3f3b,Hist1h1t,Hist1h2ah,Hist1h2ai,Hist1h2bh,Hist1h3a,Hist1h3e,Hist1h3f,Hist1h4c,Hist1h4d,Hist1h4h,Hist1h4i,Hist1h4k,Hsp90aa1,Hspa4,Jmjd6,Jun,Map2k1,Ncapd2,Rala,Raly,Rb1cc1,Rcc1,S100a9,Skp1a,Smyd2,Spg7,Tipin,Trim72,Txnl4a,Ywhah,Zmym4,Zscan4c,Zscan4d,Zscan4f	NA	NA	NA	NA
GO Biological Process	protein-DNA complex assembly		7.74642e-167					6.89498e-78					NA	Asf1a,Asf1b,H2afv,Hist1h1c,Hist1h2ab,Hist1h2ac,Hist1h2ae,Hist1h2af,Hist1h2ag,Hist1h2ak,Hist1h2an,Hist1h2ap,Hist1h2bb,Hist1h2bc,Hist1h2be,Hist1h2bf,Hist1h2bg,Hist1h2bj,Hist1h2bk,Hist1h2bl,Hist1h2bm,Hist1h2bn,Hist1h2bp,Hist1h3b,Hist1h3c,Hist1h3d,Hist1h3g,Hist1h3h,Hist1h3i,Hist1h4a,Hist1h4n,Hist2h3b,Hist2h3c1,Hp1bp3	NA	NA	NA	NA	Cenpv,H2afx,H3f3a,H3f3b,Hist1h1t,Hist1h2ah,Hist1h2ai,Hist1h2bh,Hist1h3a,Hist1h3e,Hist1h3f,Hist1h4c,Hist1h4d,Hist1h4h,Hist1h4i,Hist1h4k	NA	NA	NA	NA
GO Biological Process	protein-DNA complex subunit organization		1.67207e-166					9.83878e-78					NA	Asf1a,Asf1b,H2afv,Hist1h1c,Hist1h2ab,Hist1h2ac,Hist1h2ae,Hist1h2af,Hist1h2ag,Hist1h2ak,Hist1h2an,Hist1h2ap,Hist1h2bb,Hist1h2bc,Hist1h2be,Hist1h2bf,Hist1h2bg,Hist1h2bj,Hist1h2bk,Hist1h2bl,Hist1h2bm,Hist1h2bn,Hist1h2bp,Hist1h3b,Hist1h3c,Hist1h3d,Hist1h3g,Hist1h3h,Hist1h3i,Hist1h4a,Hist1h4n,Hist2h3b,Hist2h3c1,Hp1bp3	NA	NA	NA	NA	Cenpv,H2afx,H3f3a,H3f3b,Hist1h1t,Hist1h2ah,Hist1h2ai,Hist1h2bh,Hist1h3a,Hist1h3e,Hist1h3f,Hist1h4c,Hist1h4d,Hist1h4h,Hist1h4i,Hist1h4k	NA	NA	NA	NA
GO Biological Process	regulation of gene silencing		6.82017e-41					4.97549e-26					NA	Hist1h3b,Hist1h3c,Hist1h3d,Hist1h3g,Hist1h3h,Hist1h3i,Hist2h3b,Hist2h3c1	NA	NA	NA	NA	Aicda,Apobec1,Hist1h3a,Hist1h3e,Hist1h3f	NA	NA	NA	NA
MSigDB Pathway	Genes involved in Packaging Of Telomere Ends		2.38706e-102					4.77413e-40					NA	H2afv,Hist1h2ab,Hist1h2ac,Hist1h2ae,Hist1h2ag,Hist1h2ak,Hist1h2an,Hist1h2ap,Hist1h2bb,Hist1h2bc,Hist1h2be,Hist1h2bf,Hist1h2bg,Hist1h2bj,Hist1h2bk,Hist1h2bl,Hist1h2bm,Hist1h2bn,Hist1h3d,Hist1h4a	NA	NA	NA	NA	H2afx,Hist1h2ai,Hist1h2bh,Hist1h4c,Hist1h4d,Hist1h4h,Hist1h4i,Hist1h4k	NA	NA	NA	NA
MSigDB Pathway	Genes involved in RNA PolymeraseChain Elongation		8.73062e-29					3.59727e-25					NA	Hist1h3b,Hist1h3c,Hist1h3g,Hist1h3h,Hist1h3i,Polr2k	NA	NA	NA	NA	H3f3a,H3f3b,Hist1h3a,Hist1h3e,Hist1h3f	NA	NA	NA	NA
MSigDB Pathway	Genes involved in RNA Polymerase I Promoter Opening		1.85274e-128					1.02483e-66					NA	H2afv,Hist1h2ab,Hist1h2ac,Hist1h2ae,Hist1h2ag,Hist1h2ak,Hist1h2an,Hist1h2ap,Hist1h2bb,Hist1h2bc,Hist1h2be,Hist1h2bf,Hist1h2bg,Hist1h2bj,Hist1h2bk,Hist1h2bl,Hist1h2bm,Hist1h2bn,Hist1h3b,Hist1h3c,Hist1h3d,Hist1h3g,Hist1h3h,Hist1h3i,Hist1h4a	NA	NA	NA	NA	H2afx,H3f3a,H3f3b,Hist1h2ai,Hist1h2bh,Hist1h3a,Hist1h3e,Hist1h3f,Hist1h4c,Hist1h4d,Hist1h4h,Hist1h4i,Hist1h4k	NA	NA	NA	NA
MSigDB Pathway	Genes involved in RNA Polymerase I, RNA Polymerase III, and Mitochondrial Transcription		1.38486e-125					1.49361e-62					NA	H2afv,Hist1h2ab,Hist1h2ac,Hist1h2ae,Hist1h2ag,Hist1h2ak,Hist1h2an,Hist1h2ap,Hist1h2bb,Hist1h2bc,Hist1h2be,Hist1h2bf,Hist1h2bg,Hist1h2bj,Hist1h2bk,Hist1h2bl,Hist1h2bm,Hist1h2bn,Hist1h3b,Hist1h3c,Hist1h3d,Hist1h3g,Hist1h3h,Hist1h3i,Hist1h4a,Polr2k	NA	NA	NA	NA	H2afx,H3f3a,H3f3b,Hist1h2ai,Hist1h2bh,Hist1h3a,Hist1h3e,Hist1h3f,Hist1h4c,Hist1h4d,Hist1h4h,Hist1h4i,Hist1h4k	NA	NA	NA	NA
MSigDB Pathway	Genes involved in RNA PolymerasePromoter Clearance		9.74385e-130					8.68001e-65					NA	H2afv,Hist1h2ab,Hist1h2ac,Hist1h2ae,Hist1h2ag,Hist1h2ak,Hist1h2an,Hist1h2ap,Hist1h2bb,Hist1h2bc,Hist1h2be,Hist1h2bf,Hist1h2bg,Hist1h2bj,Hist1h2bk,Hist1h2bl,Hist1h2bm,Hist1h2bn,Hist1h3b,Hist1h3c,Hist1h3d,Hist1h3g,Hist1h3h,Hist1h3i,Hist1h4a,Polr2k	NA	NA	NA	NA	H2afx,H3f3a,H3f3b,Hist1h2ai,Hist1h2bh,Hist1h3a,Hist1h3e,Hist1h3f,Hist1h4c,Hist1h4d,Hist1h4h,Hist1h4i,Hist1h4k	NA	NA	NA	NA
MSigDB Pathway	Genes involved in Telomere Maintenance		3.87702e-98					1.68461e-43					NA	H2afv,Hist1h2ab,Hist1h2ac,Hist1h2ae,Hist1h2ag,Hist1h2ak,Hist1h2an,Hist1h2ap,Hist1h2bb,Hist1h2bc,Hist1h2be,Hist1h2bf,Hist1h2bg,Hist1h2bj,Hist1h2bk,Hist1h2bl,Hist1h2bm,Hist1h2bn,Hist1h3d,Hist1h4a	NA	NA	NA	NA	H2afx,Hist1h2ai,Hist1h2bh,Hist1h4c,Hist1h4d,Hist1h4h,Hist1h4i,Hist1h4k,Nhp2	NA	NA	NA	NA
MSigDB Pathway	Genes involved in Transcription		9.36296e-120					1.37246e-79					NA	H2afv,Hist1h2ab,Hist1h2ac,Hist1h2ae,Hist1h2ag,Hist1h2ak,Hist1h2an,Hist1h2ap,Hist1h2bb,Hist1h2bc,Hist1h2be,Hist1h2bf,Hist1h2bg,Hist1h2bj,Hist1h2bk,Hist1h2bl,Hist1h2bm,Hist1h2bn,Hist1h3b,Hist1h3c,Hist1h3d,Hist1h3g,Hist1h3h,Hist1h3i,Hist1h4a,Polr2k	NA	NA	NA	NA	Gtf2f1,H2afx,H3f3a,H3f3b,Hist1h2ai,Hist1h2bh,Hist1h3a,Hist1h3e,Hist1h3f,Hist1h4c,Hist1h4d,Hist1h4h,Hist1h4i,Hist1h4k,Polr2a,Srsf2,Srsf3	NA	NA	NA	NA
MSigDB Pathway	Systemic lupus erythematosus		8.84707e-122					2.44131e-68					NA	H2afv,Hist1h2ab,Hist1h2ac,Hist1h2ae,Hist1h2ag,Hist1h2ak,Hist1h2an,Hist1h2ap,Hist1h2bb,Hist1h2bc,Hist1h2be,Hist1h2bf,Hist1h2bg,Hist1h2bj,Hist1h2bk,Hist1h2bl,Hist1h2bm,Hist1h2bn,Hist1h3b,Hist1h3c,Hist1h3d,Hist1h3g,Hist1h3h,Hist1h3i,Hist1h4a	NA	NA	NA	NA	H2afx,H3f3a,H3f3b,Hist1h2ah,Hist1h2ai,Hist1h2bh,Hist1h3a,Hist1h3e,Hist1h3f,Hist1h4c,Hist1h4d,Hist1h4h,Hist1h4i,Hist1h4k	NA	NA	NA	NA
PANTHER Pathway	DNA replication		5.16098e-39					5.24182e-25					NA	Hist1h3b,Hist1h3c,Hist1h3d,Hist1h3g,Hist1h3h,Hist1h3i,Hist2h3b,Hist2h3c1	NA	NA	NA	NA	H3f3a,H3f3b,Hist1h3a,Hist1h3e,Hist1h3f	NA	NA	NA	NA
GO Biological Process	cell surface receptor linked signaling pathway			0	0								NA	NA	Acsl1,Adam4,Adam5,Adcy4,Adora1,Adra1a,Adrb1,Adrb3,Agk,Agtr1a,Akap4,Amhr2,Apcdd1,Arl6,Avpr2,Bambi,Bex1,Bmp10,Bmp4,Bmp6,Brs3,Btrc,Calcoco1,Ccr1l1,Ccr2,Ccr5,Cd44,Cd8a,Cdk5r1,Cenpi,Cfc1,Chd8,Chrm3,Cib2,Cited1,Cntn1,Col1a2,Commd7,Csf2ra,Csf2rb2,Cthrc1,Ctla4,Cxcl13,Cxcr6,Cysltr1,Dgkh,Dgkq,Dixdc1,Dner,Dok4,Dtx1,Dvl2,Ednra,Efemp1,Efnb3,Egf,Egfr,Emr1,Entpd1,Epha6,Ephb6,F2rl1,Fcer1a,Fgf10,Fgf23,Fgf3,Fgf4,F…	Acvr2b,Adam24,Adra2a,Angpt2,Aph1a,Axl,Bhlha15,Boc,Cacna1d,Cacnb4,Cd79a,Celsr1,Chrm4,Cib1,Csrnp1,Ddr2,Drd4,Duox1,Duox2,Dvl3,Eid2,Eif2ak3,Entpd2,Epha5,Fgr,Fkbp8,Flt4,Fzd10,Fzd3,Galp,Galr1,Gata4,Gm10670,Gm16451,Gm4144,Gm4175,Gm4175,Gm4177,Gm4179,Gm4461,Gm4498,Gm6164,Gm8720,Gpr124,Gpr165,Gpr179,Gpr25,Gpr37l1,Gpr44,Grin1,Hhip,Hipk2,Hnf1a,Igsf10,Il11ra1,Itgae,Krt18,Krt8,Lphn3,Lrrfip2,Lzts2,Malt1,Map3k1…	NA	NA	NA	NA	NA	NA	NA
GO Biological Process	detection of chemical stimulus			0	0		0						NA	NA	Accn3,Gm10081,Gnat3,Olfr11,Olfr1275,Olfr1276,Olfr1277,Olfr1278,Olfr1279,Olfr1280,Olfr1281,Olfr1282,Olfr1283,Olfr1284,Olfr1286,Olfr1287,Olfr1288,Olfr1289,Olfr1290,Olfr1294,Olfr1324,Olfr1351,Olfr1352,Olfr1353,Olfr1354,Olfr1355,Olfr1356,Olfr1360,Olfr1361,Olfr1368,Olfr1370,Olfr139,Olfr1396,Olfr1404,Olfr1406,Olfr1408,Olfr1419,Olfr1420,Olfr143,Olfr146,Olfr147,Olfr1512,Olfr1513,Olfr1532-ps1,Olfr1537-ps1…	Gm4461,Kcnmb4,Olfr1000,Olfr1002,Olfr1006,Olfr1008,Olfr1009,Olfr1010,Olfr1012,Olfr1013,Olfr1014,Olfr1015,Olfr1016,Olfr1018,Olfr1019,Olfr1020,Olfr1022,Olfr1023,Olfr1024,Olfr1026,Olfr1028,Olfr1029,Olfr1030,Olfr1031,Olfr1032,Olfr1033,Olfr1034,Olfr1036,Olfr1037,Olfr1038-ps,Olfr1039,Olfr1040,Olfr1042,Olfr1043,Olfr1044,Olfr1045,Olfr1046,Olfr1047,Olfr1048,Olfr1049,Olfr1051,Olfr1052,Olfr1053,Olfr1054,Olfr…	NA	Casr,Lbp,Olfr1320,Olfr1321,Olfr1322,Olfr1323,Olfr1364,Olfr1366,Olfr1367,Olfr1380,Olfr1381,Olfr1382,Olfr1383,Olfr1384,Olfr1385,Olfr1386,Olfr1387,Olfr1388,Olfr148,Olfr149,Olfr15,Olfr150,Olfr1535,Olfr161,Olfr166,Olfr167,Olfr168,Olfr169,Olfr170,Olfr171,Olfr229,Olfr292,Olfr293,Olfr294,Olfr295,Olfr297,Olfr298,Olfr299,Olfr303,Olfr304,Olfr305,Olfr307,Olfr308,Olfr309,Olfr310,Olfr372,Olfr373,Olfr38,Olfr44,…	NA	NA	NA	NA	NA
GO Biological Process	detection of chemical stimulus involved in sensory perception			0	0		0						NA	NA	Accn3,Gm10081,Gnat3,Olfr11,Olfr1275,Olfr1276,Olfr1277,Olfr1278,Olfr1279,Olfr1280,Olfr1281,Olfr1282,Olfr1283,Olfr1284,Olfr1286,Olfr1287,Olfr1288,Olfr1289,Olfr1290,Olfr1294,Olfr1324,Olfr1351,Olfr1352,Olfr1353,Olfr1354,Olfr1355,Olfr1356,Olfr1360,Olfr1361,Olfr1368,Olfr1370,Olfr139,Olfr1396,Olfr1404,Olfr1406,Olfr1408,Olfr1419,Olfr1420,Olfr143,Olfr146,Olfr147,Olfr1512,Olfr1513,Olfr1532-ps1,Olfr1537-ps1…	Gm4461,Olfr1000,Olfr1002,Olfr1006,Olfr1008,Olfr1009,Olfr1010,Olfr1012,Olfr1013,Olfr1014,Olfr1015,Olfr1016,Olfr1018,Olfr1019,Olfr1020,Olfr1022,Olfr1023,Olfr1024,Olfr1026,Olfr1028,Olfr1029,Olfr1030,Olfr1031,Olfr1032,Olfr1033,Olfr1034,Olfr1036,Olfr1037,Olfr1038-ps,Olfr1039,Olfr1040,Olfr1042,Olfr1043,Olfr1044,Olfr1045,Olfr1046,Olfr1047,Olfr1048,Olfr1049,Olfr1051,Olfr1052,Olfr1053,Olfr1054,Olfr1055,Ol…	NA	Olfr1320,Olfr1321,Olfr1322,Olfr1323,Olfr1364,Olfr1366,Olfr1367,Olfr1380,Olfr1381,Olfr1382,Olfr1383,Olfr1384,Olfr1385,Olfr1386,Olfr1387,Olfr1388,Olfr148,Olfr149,Olfr15,Olfr150,Olfr1535,Olfr161,Olfr166,Olfr167,Olfr168,Olfr169,Olfr170,Olfr171,Olfr229,Olfr292,Olfr293,Olfr294,Olfr295,Olfr297,Olfr298,Olfr299,Olfr303,Olfr304,Olfr305,Olfr307,Olfr308,Olfr309,Olfr310,Olfr372,Olfr373,Olfr38,Olfr44,Olfr446,O…	NA	NA	NA	NA	NA
GO Biological Process	detection of chemical stimulus involved in sensory perception of smell			0	0		0						NA	NA	Gm10081,Olfr11,Olfr1275,Olfr1276,Olfr1277,Olfr1278,Olfr1279,Olfr1280,Olfr1281,Olfr1282,Olfr1283,Olfr1284,Olfr1286,Olfr1287,Olfr1288,Olfr1289,Olfr1290,Olfr1294,Olfr1324,Olfr1351,Olfr1352,Olfr1353,Olfr1354,Olfr1355,Olfr1356,Olfr1360,Olfr1361,Olfr1368,Olfr1370,Olfr139,Olfr1396,Olfr1404,Olfr1406,Olfr1408,Olfr1419,Olfr1420,Olfr143,Olfr146,Olfr147,Olfr1512,Olfr1513,Olfr1532-ps1,Olfr1537-ps1,Olfr159,Olf…	Gm4461,Olfr1000,Olfr1002,Olfr1006,Olfr1008,Olfr1009,Olfr1010,Olfr1012,Olfr1013,Olfr1014,Olfr1015,Olfr1016,Olfr1018,Olfr1019,Olfr1020,Olfr1022,Olfr1023,Olfr1024,Olfr1026,Olfr1028,Olfr1029,Olfr1030,Olfr1031,Olfr1032,Olfr1033,Olfr1034,Olfr1036,Olfr1037,Olfr1038-ps,Olfr1039,Olfr1040,Olfr1042,Olfr1043,Olfr1044,Olfr1045,Olfr1046,Olfr1047,Olfr1048,Olfr1049,Olfr1051,Olfr1052,Olfr1053,Olfr1054,Olfr1055,Ol…	NA	Olfr1320,Olfr1321,Olfr1322,Olfr1323,Olfr1364,Olfr1366,Olfr1367,Olfr1380,Olfr1381,Olfr1382,Olfr1383,Olfr1384,Olfr1385,Olfr1386,Olfr1387,Olfr1388,Olfr148,Olfr149,Olfr15,Olfr150,Olfr1535,Olfr161,Olfr166,Olfr167,Olfr168,Olfr169,Olfr170,Olfr171,Olfr229,Olfr292,Olfr293,Olfr294,Olfr295,Olfr297,Olfr298,Olfr299,Olfr303,Olfr304,Olfr305,Olfr307,Olfr308,Olfr309,Olfr310,Olfr372,Olfr373,Olfr38,Olfr44,Olfr446,O…	NA	NA	NA	NA	NA
GO Biological Process	detection of stimulus			0	0								NA	NA	Accn3,Adora1,Cacna1f,Cadm1,Chrna9,Fyn,Gm10081,Gnat3,Lxn,Ngfr,Olfr11,Olfr1275,Olfr1276,Olfr1277,Olfr1278,Olfr1279,Olfr1280,Olfr1281,Olfr1282,Olfr1283,Olfr1284,Olfr1286,Olfr1287,Olfr1288,Olfr1289,Olfr1290,Olfr1294,Olfr1324,Olfr1351,Olfr1352,Olfr1353,Olfr1354,Olfr1355,Olfr1356,Olfr1360,Olfr1361,Olfr1368,Olfr1370,Olfr139,Olfr1396,Olfr1404,Olfr1406,Olfr1408,Olfr1419,Olfr1420,Olfr143,Olfr146,Olfr147,Ol…	Chrna10,Crtam,Gm4461,Kcnmb4,Olfr1000,Olfr1002,Olfr1006,Olfr1008,Olfr1009,Olfr1010,Olfr1012,Olfr1013,Olfr1014,Olfr1015,Olfr1016,Olfr1018,Olfr1019,Olfr1020,Olfr1022,Olfr1023,Olfr1024,Olfr1026,Olfr1028,Olfr1029,Olfr1030,Olfr1031,Olfr1032,Olfr1033,Olfr1034,Olfr1036,Olfr1037,Olfr1038-ps,Olfr1039,Olfr1040,Olfr1042,Olfr1043,Olfr1044,Olfr1045,Olfr1046,Olfr1047,Olfr1048,Olfr1049,Olfr1051,Olfr1052,Olfr1053…	NA	NA	NA	NA	NA	NA	NA
GO Biological Process	detection of stimulus involved in sensory perception			0	0								NA	NA	Accn3,Adora1,Cacna1f,Chrna9,Fyn,Gm10081,Gnat3,Lxn,Olfr11,Olfr1275,Olfr1276,Olfr1277,Olfr1278,Olfr1279,Olfr1280,Olfr1281,Olfr1282,Olfr1283,Olfr1284,Olfr1286,Olfr1287,Olfr1288,Olfr1289,Olfr1290,Olfr1294,Olfr1324,Olfr1351,Olfr1352,Olfr1353,Olfr1354,Olfr1355,Olfr1356,Olfr1360,Olfr1361,Olfr1368,Olfr1370,Olfr139,Olfr1396,Olfr1404,Olfr1406,Olfr1408,Olfr1419,Olfr1420,Olfr143,Olfr146,Olfr147,Olfr1512,Olfr…	Chrna10,Gm4461,Olfr1000,Olfr1002,Olfr1006,Olfr1008,Olfr1009,Olfr1010,Olfr1012,Olfr1013,Olfr1014,Olfr1015,Olfr1016,Olfr1018,Olfr1019,Olfr1020,Olfr1022,Olfr1023,Olfr1024,Olfr1026,Olfr1028,Olfr1029,Olfr1030,Olfr1031,Olfr1032,Olfr1033,Olfr1034,Olfr1036,Olfr1037,Olfr1038-ps,Olfr1039,Olfr1040,Olfr1042,Olfr1043,Olfr1044,Olfr1045,Olfr1046,Olfr1047,Olfr1048,Olfr1049,Olfr1051,Olfr1052,Olfr1053,Olfr1054,Olf…	NA	NA	NA	NA	NA	NA	NA
GO Biological Process	G-protein coupled receptor protein signaling pathway			0	0								NA	NA	Adcy4,Adora1,Adra1a,Adrb1,Adrb3,Agk,Agtr1a,Avpr2,Brs3,Ccr1l1,Ccr2,Ccr5,Cdk5r1,Cenpi,Chrm3,Cxcr6,Cysltr1,Dgkh,Dgkq,Ednra,Emr1,Entpd1,F2rl1,Fzd4,Fzd6,Fzd7,Gabra3,Gal,Gcg,Glra2,Glrb,Gm10081,Gm5127,Gm7609,Gnai1,Gnal,Gnas,Gnat3,Gnb1,Gng4,Gnrhr,Gpr1,Gpr101,Gpr113,Gpr15,Gpr150,Gpr156,Gpr18,Gpr183,Gpr52,Gpr62,Gpr65,Gpr82,Gpr84,Grm1,Grm2,Grpr,Hcrt,Homer1,Hrh1,Hrh4,Htr2c,Jak2,Lpar3,Ltb4r1,Mc1r,Mc4r,Mrgpra6…	Adra2a,Bhlha15,Cacna1d,Cacnb4,Celsr1,Chrm4,Drd4,Entpd2,Fzd10,Fzd3,Galp,Galr1,Gm10670,Gm16451,Gm4144,Gm4175,Gm4175,Gm4177,Gm4179,Gm4461,Gm4498,Gm6164,Gm8720,Gpr124,Gpr165,Gpr179,Gpr25,Gpr37l1,Gpr44,Lphn3,Mrgprb1,Mrgprb2,Mrgprb3,Mrgprx2,Nmb,Npb,Olfr1000,Olfr1002,Olfr1006,Olfr1008,Olfr1009,Olfr1010,Olfr1012,Olfr1013,Olfr1014,Olfr1015,Olfr1016,Olfr1018,Olfr1019,Olfr1020,Olfr1022,Olfr1023,Olfr1024,Olf…	NA	NA	NA	NA	NA	NA	NA
GO Biological Process	neurological system process			0	0		0						NA	NA	Abca4,Accn3,Adcy8,Adora1,Adra1a,Adrb1,Agtpbp1,Agtr1a,Als2,Amph,Apba1,Aplp2,Bbs4,Bche,Cacna1f,Calb1,Ccr2,Cdk5,Chrm3,Chrna9,Cnga1,Cnga2,Coch,Cplx1,Crygc,Crym,Dag1,Dennd1a,Dlg4,Ednra,Espn,Frmpd4,Fyn,Fzd4,Gaa,Gabra3,Gad2,Glrb,Gm10081,Gnal,Gnas,Gnat3,Gnb1,Gria2,Grik1,Grin2c,Grm1,Grm2,Grpr,Grxcr1,Hcrt,Hexa,Hrh1,Kcnq4,Kif1b,Klk1b26,Lamb2,Lrp6,Lxn,Marveld2,Mbp,Mc1r,Mpp5,Myo1a,Napa,Nbn,Ndrg1,Npy1r,Npy5r,N…	Abat,Afg3l2,Alms1,Anapc2,Best2,Cacna1d,Cacnb4,Camk1,Chat,Chrna10,Col1a1,Cyp7b1,Dfnb59,Dhh,Drd4,Eif2b5,Ercc6,Gm4144,Gm4175,Gm4177,Gm4179,Gm4461,Gm4498,Grin1,Grk1,Iapp,Itpr3,Kcnmb4,Lamc3,Mdk,Mink1,Nab1,Ncan,Nfasc,Olfr1000,Olfr1002,Olfr1006,Olfr1008,Olfr1009,Olfr1010,Olfr1012,Olfr1013,Olfr1014,Olfr1015,Olfr1016,Olfr1018,Olfr1019,Olfr1020,Olfr1022,Olfr1023,Olfr1024,Olfr1026,Olfr1028,Olfr1029,Olfr1030…	NA	Aaas,Accn2,Adcy1,Adcy5,Adra1b,Agt,App,Atp6v0a4,Bfsp2,Cacng4,Camk4,Cav2,Cd24a,Chrnb4,Cldn19,Cln6,Clrn1,Cnga3,Cnga4,Cngb3,Cnnm4,Cntn5,Cplx3,Crhr1,Dicer1,Dlg2,Doc2a,Doc2b,Drd1a,Drd2,Drd3,Ephb1,Fgfr1,Gabra2,Gabrg1,Ghrl,Gjb2,Gjb6,Gjd2,Gm11744,Grid2,Grik2,Grin2b,Grin2d,Grin3a,Grm3,Grm5,Grm6,Grm7,Grm8,Gsx2,Hnmt,Hoxb8,Htr1b,Id4,Ilk,Kcnma1,Lhx8,Lin7a,Loxhd1,Myo6,Napb,Ndn,Nefl,Neto1,Neurod2,Ngf,Nipbl,Nmur2…	NA	NA	NA	NA	NA
GO Biological Process	sensory perception			0	0								NA	NA	Abca4,Accn3,Adora1,Adrb1,Bbs4,Cacna1f,Ccr2,Cdk5,Chrna9,Cnga1,Cnga2,Coch,Crygc,Crym,Ednra,Espn,Fyn,Fzd4,Glrb,Gm10081,Gnal,Gnas,Gnat3,Gnb1,Grm1,Grxcr1,Hexa,Kcnq4,Lamb2,Lxn,Marveld2,Mc1r,Myo1a,Npy1r,Nr2e1,Olfr11,Olfr1275,Olfr1276,Olfr1277,Olfr1278,Olfr1279,Olfr1280,Olfr1281,Olfr1282,Olfr1283,Olfr1284,Olfr1286,Olfr1287,Olfr1288,Olfr1289,Olfr1290,Olfr1294,Olfr1324,Olfr1351,Olfr1352,Olfr1353,Olfr1354,O…	Alms1,Best2,Cacna1d,Chrna10,Col1a1,Dfnb59,Ercc6,Gm4144,Gm4175,Gm4177,Gm4179,Gm4461,Gm4498,Grin1,Grk1,Iapp,Itpr3,Lamc3,Olfr1000,Olfr1002,Olfr1006,Olfr1008,Olfr1009,Olfr1010,Olfr1012,Olfr1013,Olfr1014,Olfr1015,Olfr1016,Olfr1018,Olfr1019,Olfr1020,Olfr1022,Olfr1023,Olfr1024,Olfr1026,Olfr1028,Olfr1029,Olfr1030,Olfr1031,Olfr1032,Olfr1033,Olfr1034,Olfr1036,Olfr1037,Olfr1038-ps,Olfr1039,Olfr1040,Olfr1042…	NA	NA	NA	NA	NA	NA	NA
GO Biological Process	sensory perception of chemical stimulus			0	0								NA	NA	Accn3,Bbs4,Cnga2,Gm10081,Gnal,Gnas,Gnat3,Gnb1,Olfr11,Olfr1275,Olfr1276,Olfr1277,Olfr1278,Olfr1279,Olfr1280,Olfr1281,Olfr1282,Olfr1283,Olfr1284,Olfr1286,Olfr1287,Olfr1288,Olfr1289,Olfr1290,Olfr1294,Olfr1324,Olfr1351,Olfr1352,Olfr1353,Olfr1354,Olfr1355,Olfr1356,Olfr1360,Olfr1361,Olfr1368,Olfr1370,Olfr139,Olfr1396,Olfr1404,Olfr1406,Olfr1408,Olfr1419,Olfr1420,Olfr143,Olfr146,Olfr147,Olfr1512,Olfr1513…	Best2,Gm4144,Gm4175,Gm4177,Gm4179,Gm4461,Gm4498,Itpr3,Olfr1000,Olfr1002,Olfr1006,Olfr1008,Olfr1009,Olfr1010,Olfr1012,Olfr1013,Olfr1014,Olfr1015,Olfr1016,Olfr1018,Olfr1019,Olfr1020,Olfr1022,Olfr1023,Olfr1024,Olfr1026,Olfr1028,Olfr1029,Olfr1030,Olfr1031,Olfr1032,Olfr1033,Olfr1034,Olfr1036,Olfr1037,Olfr1038-ps,Olfr1039,Olfr1040,Olfr1042,Olfr1043,Olfr1044,Olfr1045,Olfr1046,Olfr1047,Olfr1048,Olfr1049,…	NA	NA	NA	NA	NA	NA	NA
GO Biological Process	sensory perception of smell			0	0		0						NA	NA	Bbs4,Cnga2,Gm10081,Gnal,Olfr11,Olfr1275,Olfr1276,Olfr1277,Olfr1278,Olfr1279,Olfr1280,Olfr1281,Olfr1282,Olfr1283,Olfr1284,Olfr1286,Olfr1287,Olfr1288,Olfr1289,Olfr1290,Olfr1294,Olfr1324,Olfr1351,Olfr1352,Olfr1353,Olfr1354,Olfr1355,Olfr1356,Olfr1360,Olfr1361,Olfr1368,Olfr1370,Olfr139,Olfr1396,Olfr1404,Olfr1406,Olfr1408,Olfr1419,Olfr1420,Olfr143,Olfr146,Olfr147,Olfr1512,Olfr1513,Olfr1532-ps1,Olfr1537…	Best2,Gm4461,Olfr1000,Olfr1002,Olfr1006,Olfr1008,Olfr1009,Olfr1010,Olfr1012,Olfr1013,Olfr1014,Olfr1015,Olfr1016,Olfr1018,Olfr1019,Olfr1020,Olfr1022,Olfr1023,Olfr1024,Olfr1026,Olfr1028,Olfr1029,Olfr1030,Olfr1031,Olfr1032,Olfr1033,Olfr1034,Olfr1036,Olfr1037,Olfr1038-ps,Olfr1039,Olfr1040,Olfr1042,Olfr1043,Olfr1044,Olfr1045,Olfr1046,Olfr1047,Olfr1048,Olfr1049,Olfr1051,Olfr1052,Olfr1053,Olfr1054,Olfr1…	NA	Cnga4,Drd2,Grm7,Grm8,Olfr1320,Olfr1321,Olfr1322,Olfr1323,Olfr1364,Olfr1366,Olfr1367,Olfr1380,Olfr1381,Olfr1382,Olfr1383,Olfr1384,Olfr1385,Olfr1386,Olfr1387,Olfr1388,Olfr148,Olfr149,Olfr15,Olfr150,Olfr1535,Olfr161,Olfr166,Olfr167,Olfr168,Olfr169,Olfr170,Olfr171,Olfr229,Olfr292,Olfr293,Olfr294,Olfr295,Olfr297,Olfr298,Olfr299,Olfr303,Olfr304,Olfr305,Olfr307,Olfr308,Olfr309,Olfr310,Olfr372,Olfr373,Ol…	NA	NA	NA	NA	NA
GO Biological Process	system process			0	0		0						NA	NA	Abca4,Accn3,Aco1,Adcy8,Adora1,Adra1a,Adrb1,Adrb3,Agtpbp1,Agtr1a,Als2,Amn,Amph,Apba1,Apln,Aplp2,Aqp2,Aqp5,Arg2,Atp6ap2,Avpr2,Bbs4,Bche,Bmp4,Cacna1f,Cacna1s,Calb1,Camk2d,Ccr2,Cdk5,Cga,Chrm3,Chrna9,Cnga1,Cnga2,Coch,Col1a2,Cplx1,Crygc,Crym,Dag1,Dennd1a,Dlg4,Ednra,Espn,Fabp2,Foxc1,Frmpd4,Fyn,Fzd4,Gaa,Gabra3,Gad2,Gcnt3,Glrb,Gm10081,Gnal,Gnas,Gnat3,Gnb1,Gria2,Grik1,Grin2c,Grm1,Grm2,Grpr,Grxcr1,Hcrt,Heg1…	Abat,Afg3l2,Alms1,Anapc2,Aqp7,Best2,Cacna1d,Cacnb4,Camk1,Chat,Chrna10,Col1a1,Cyp7b1,Dfnb59,Dhh,Drd4,Eif2b5,Ercc6,Gm4144,Gm4175,Gm4177,Gm4179,Gm4461,Gm4498,Grin1,Grk1,Hmox1,Hnf1a,Iapp,Itpr3,Kcnmb4,Lamc3,Mdk,Mink1,Mybpc2,Nab1,Ncan,Ncaph2,Nfasc,Olfr1000,Olfr1002,Olfr1006,Olfr1008,Olfr1009,Olfr1010,Olfr1012,Olfr1013,Olfr1014,Olfr1015,Olfr1016,Olfr1018,Olfr1019,Olfr1020,Olfr1022,Olfr1023,Olfr1024,Olfr…	NA	Aaas,Accn2,Adcy1,Adcy5,Adora2b,Adra1b,Agt,Ahr,Angpt1,App,Atp6v0a4,Avp,Bcl2,Bfsp2,Cacng4,Camk4,Cav2,Cd24a,Chrnb4,Cldn19,Cln6,Clrn1,Cnga3,Cnga4,Cngb3,Cnnm4,Cntn5,Cplx3,Crhr1,Cxadr,Cyba,Dicer1,Dlg2,Doc2a,Doc2b,Drd1a,Drd2,Drd3,Edn2,Ephb1,F5,Fabp1,Fgfr1,Gabra2,Gabrg1,Gdnf,Ghrl,Gjb2,Gjb6,Gjd2,Gm11744,Grid2,Grik2,Grin2b,Grin2d,Grin3a,Grm3,Grm5,Grm6,Grm7,Grm8,Gsx2,Guca2b,Gucy1a3,Hnmt,Hoxb8,Htr1b,Id4,Ilk,…	NA	NA	NA	NA	NA
GO Molecular Function	endopeptidase activity			0									NA	NA	2010106G01Rik,2210010C04Rik,4930529F22Rik,Adam21,Adam25,Adam32,Adam39,Adam4,Adam5,Adamts1,Adamts17,C2,Capn6,Casp6,Cd46,Cfb,Cfi,Cma1,Cma2,Cps1,Ctsc,Ctsg,Dpp4,F9,Fap,Gm10334,Gm2663,Gzma,Gzmd,Gzmf,Gzmg,Gzmk,Gzmn,Hgf,Klk1,Klk15,Klk1b1,Klk1b11,Klk1b16,Klk1b21,Klk1b22,Klk1b24,Klk1b26,Klk1b27,Klk1b3,Klk1b4,Klk1b5,Klk1b7-ps,Klk1b8,Klk1b9,Lgmn,Lonp2,Mbtps2,Mcpt2,Mcpt4,Mcpt8,Mcpt9,Mmp10,Mmp12,Mmp13,Mmp16,M…	NA	NA	NA	NA	NA	NA	NA	NA
GO Molecular Function	olfactory receptor activity			0	0								NA	NA	Gm10081,Olfr11,Olfr1275,Olfr1276,Olfr1277,Olfr1278,Olfr1279,Olfr1280,Olfr1281,Olfr1282,Olfr1283,Olfr1284,Olfr1286,Olfr1287,Olfr1288,Olfr1289,Olfr1290,Olfr1294,Olfr1324,Olfr1351,Olfr1352,Olfr1353,Olfr1354,Olfr1355,Olfr1356,Olfr1360,Olfr1361,Olfr1368,Olfr1370,Olfr139,Olfr1396,Olfr1404,Olfr1406,Olfr1408,Olfr1419,Olfr1420,Olfr143,Olfr146,Olfr147,Olfr1512,Olfr1513,Olfr1532-ps1,Olfr1537-ps1,Olfr159,Olf…	Gm4461,Olfr1000,Olfr1002,Olfr1006,Olfr1008,Olfr1009,Olfr1010,Olfr1012,Olfr1013,Olfr1014,Olfr1015,Olfr1016,Olfr1018,Olfr1019,Olfr1020,Olfr1022,Olfr1023,Olfr1024,Olfr1026,Olfr1028,Olfr1029,Olfr1030,Olfr1031,Olfr1032,Olfr1033,Olfr1034,Olfr1036,Olfr1037,Olfr1038-ps,Olfr1039,Olfr1040,Olfr1042,Olfr1043,Olfr1044,Olfr1045,Olfr1046,Olfr1047,Olfr1048,Olfr1049,Olfr1051,Olfr1052,Olfr1053,Olfr1054,Olfr1055,Ol…	NA	NA	NA	NA	NA	NA	NA
GO Molecular Function	serine hydrolase activity			3.3789e-255									NA	NA	2210010C04Rik,C2,Cfb,Cfi,Cma1,Cma2,Ctsg,Dpp4,F9,Fap,Gm10334,Gm2663,Gzma,Gzmd,Gzmf,Gzmg,Gzmk,Gzmn,Hgf,Klk1,Klk15,Klk1b1,Klk1b11,Klk1b16,Klk1b21,Klk1b22,Klk1b24,Klk1b26,Klk1b27,Klk1b3,Klk1b4,Klk1b5,Klk1b7-ps,Klk1b8,Klk1b9,Lonp2,Mcpt2,Mcpt4,Mcpt8,Mcpt9,Mmp8,Parl,Pcsk2,Pcsk5,Plg,Prss1,Prss2,Prss23,Prss28,Prss29,Prss34,Prss35,Prss40,St14,Tmprss11c,Tmprss11d,Tmprss12,Tpsab1,Tpsb2,Tpsg1	NA	NA	NA	NA	NA	NA	NA	NA
GO Molecular Function	serine-type endopeptidase activity			3.67716e-258									NA	NA	2210010C04Rik,C2,Cfb,Cfi,Cma1,Cma2,Ctsg,Dpp4,F9,Fap,Gm10334,Gm2663,Gzma,Gzmd,Gzmf,Gzmg,Gzmk,Gzmn,Hgf,Klk1,Klk15,Klk1b1,Klk1b11,Klk1b16,Klk1b21,Klk1b22,Klk1b24,Klk1b26,Klk1b27,Klk1b3,Klk1b4,Klk1b5,Klk1b7-ps,Klk1b8,Klk1b9,Lonp2,Mcpt2,Mcpt4,Mcpt8,Mcpt9,Mmp8,Parl,Pcsk2,Pcsk5,Plg,Prss1,Prss2,Prss23,Prss28,Prss29,Prss34,Prss35,Prss40,St14,Tmprss11c,Tmprss11d,Tmprss12,Tpsab1,Tpsb2,Tpsg1	NA	NA	NA	NA	NA	NA	NA	NA
GO Molecular Function	serine-type peptidase activity			1.46631e-255									NA	NA	2210010C04Rik,C2,Cfb,Cfi,Cma1,Cma2,Ctsg,Dpp4,F9,Fap,Gm10334,Gm2663,Gzma,Gzmd,Gzmf,Gzmg,Gzmk,Gzmn,Hgf,Klk1,Klk15,Klk1b1,Klk1b11,Klk1b16,Klk1b21,Klk1b22,Klk1b24,Klk1b26,Klk1b27,Klk1b3,Klk1b4,Klk1b5,Klk1b7-ps,Klk1b8,Klk1b9,Lonp2,Mcpt2,Mcpt4,Mcpt8,Mcpt9,Mmp8,Parl,Pcsk2,Pcsk5,Plg,Prss1,Prss2,Prss23,Prss28,Prss29,Prss34,Prss35,Prss40,St14,Tmprss11c,Tmprss11d,Tmprss12,Tpsab1,Tpsb2,Tpsg1	NA	NA	NA	NA	NA	NA	NA	NA
GO Molecular Function	signaling receptor activity			0	0								NA	NA	Abcc8,Adora1,Adra1a,Adrb1,Adrb3,Agtr1a,Amhr2,Antxr1,Anxa9,Arnt,Avpr2,Brs3,Ccr1l1,Ccr2,Ccr5,Cd44,Chrm3,Chrna2,Csf2ra,Csf2rb2,Cxcr6,Cysltr1,Ednra,Efemp1,Egfr,Emr1,Epha6,Ephb6,Esr2,F2rl1,Fcer1a,Fgfrl1,Fzd4,Fzd6,Fzd7,Gabra3,Gabre,Gabrp,Gabrq,Ghr,Gm10081,Gnrhr,Gpr1,Gpr101,Gpr113,Gpr15,Gpr150,Gpr156,Gpr18,Gpr183,Gpr52,Gpr62,Gpr65,Gpr82,Gpr84,Gria2,Grid1,Grik1,Grik4,Grin2c,Grm1,Grm2,Grpr,Hnf4a,Hrh1,Hrh4…	Acvr2b,Adra2a,Axl,Cd79a,Celsr1,Chrm4,Ddr2,Drd4,Epha5,Flt4,Fzd10,Fzd3,Galr1,Gm10670,Gm16451,Gm4144,Gm4175,Gm4175,Gm4177,Gm4179,Gm4461,Gm4498,Gm6164,Gm8720,Gpr124,Gpr165,Gpr179,Gpr25,Gpr37l1,Gpr44,Grin1,Igsf10,Il11ra1,Itpr3,Lphn3,Mrgprb1,Mrgprb2,Mrgprb3,Mrgprx2,Nkx3-1,Nr1h2,Olfr1000,Olfr1002,Olfr1006,Olfr1008,Olfr1009,Olfr1010,Olfr1012,Olfr1013,Olfr1014,Olfr1015,Olfr1016,Olfr1018,Olfr1019,Olfr1020,…	NA	NA	NA	NA	NA	NA	NA
GO Molecular Function	signal transducer activity			0	0								NA	NA	Abcc8,Adora1,Adra1a,Adrb1,Adrb3,Agtr1a,Amhr2,Antxr1,Anxa9,Arnt,Avpr2,Brs3,Ccr1l1,Ccr2,Ccr5,Cd44,Chrm3,Chrna2,Clock,Csf2ra,Csf2rb2,Cxcr6,Cysltr1,Dixdc1,Dok4,Dvl2,Ednra,Efemp1,Egfr,Emr1,Epha6,Ephb6,Esr2,F2rl1,Fcer1a,Fgfrl1,Fzd4,Fzd6,Fzd7,Gab1,Gabra3,Gabre,Gabrp,Gabrq,Ghr,Gm10081,Gnai1,Gnal,Gnas,Gnat3,Gnb1,Gng4,Gnrhr,Golt1b,Gpr1,Gpr101,Gpr113,Gpr15,Gpr150,Gpr156,Gpr18,Gpr183,Gpr52,Gpr62,Gpr65,Gpr82,…	Acvr2b,Adra2a,Axl,Bckdk,Bst2,Cd79a,Celsr1,Chrm4,Ddr2,Drd4,Dvl3,Epha5,Flt4,Fzd10,Fzd3,Galr1,Gm10670,Gm16451,Gm4144,Gm4175,Gm4175,Gm4177,Gm4179,Gm4461,Gm4498,Gm6164,Gm8720,Gpr124,Gpr165,Gpr179,Gpr25,Gpr37l1,Gpr44,Grin1,Grk1,Hmox1,Igsf10,Il11ra1,Inha,Itpr3,Kcnh2,Lphn3,Malt1,Map3k10,Mapk8,Mrgprb1,Mrgprb2,Mrgprb3,Mrgprx2,Nkx3-1,Npas2,Nr1h2,Olfr1000,Olfr1002,Olfr1006,Olfr1008,Olfr1009,Olfr1010,Olfr1012…	NA	NA	NA	NA	NA	NA	NA
GO Molecular Function	transmembrane signaling receptor activity			0	0								NA	NA	Abcc8,Adora1,Adra1a,Adrb1,Adrb3,Agtr1a,Amhr2,Antxr1,Anxa9,Avpr2,Brs3,Ccr1l1,Ccr2,Ccr5,Cd44,Chrm3,Chrna2,Csf2ra,Csf2rb2,Cxcr6,Cysltr1,Ednra,Efemp1,Egfr,Emr1,Epha6,Ephb6,F2rl1,Fcer1a,Fgfrl1,Fzd4,Fzd6,Fzd7,Gabra3,Gabre,Gabrp,Gabrq,Ghr,Gm10081,Gnrhr,Gpr1,Gpr101,Gpr113,Gpr15,Gpr150,Gpr156,Gpr18,Gpr183,Gpr52,Gpr62,Gpr65,Gpr82,Gpr84,Gria2,Grid1,Grik1,Grik4,Grin2c,Grm1,Grm2,Grpr,Hrh1,Hrh4,Htr2c,Il10rb,Il…	Acvr2b,Adra2a,Axl,Cd79a,Celsr1,Chrm4,Ddr2,Drd4,Epha5,Flt4,Fzd10,Fzd3,Galr1,Gm10670,Gm16451,Gm4144,Gm4175,Gm4175,Gm4177,Gm4179,Gm4461,Gm4498,Gm6164,Gm8720,Gpr124,Gpr165,Gpr179,Gpr25,Gpr37l1,Gpr44,Grin1,Igsf10,Il11ra1,Lphn3,Mrgprb1,Mrgprb2,Mrgprb3,Mrgprx2,Olfr1000,Olfr1002,Olfr1006,Olfr1008,Olfr1009,Olfr1010,Olfr1012,Olfr1013,Olfr1014,Olfr1015,Olfr1016,Olfr1018,Olfr1019,Olfr1020,Olfr1022,Olfr1023,O…	NA	NA	NA	NA	NA	NA	NA
GO Biological Process	biological regulation				0			0					NA	NA	NA	1500010J02Rik,3110052M02Rik,4933415F23Rik,Aanat,Abat,Acd,Acvr2b,Adam24,Adra2a,Afap1,Afg3l2,Agpat6,Agr2,Ahsg,Alms1,Anapc2,Angpt2,Aph1a,Aqp7,Arfgef2,Arfip1,Arhgap20,Arhgap22,Arhgdig,Arid3c,Armc10,Asb16,Ascc2,Aspn,Aspscr1,Atf6,Atp8b3,Atxn3,Axl,BC089491,Bak1,Barx1,Batf2,Bbx,Bckdk,Bcl11a,Best2,Bhlha15,Bhlhe22,Bicd2,Bik,Birc7,Bmp1,Boc,Brf1,Brip1,Brpf1,Bst2,Bves,C030039L03Rik,C80913,Cacna1d,Cacnb4,Camk1…	NA	NA	2500003M10Rik,5330417C22Rik,Acvrl1,Aicda,Aimp1,Ankrd11,Apobec1,Arl4a,Arrdc3,Atox1,Banp,Bclaf1,Brdt,Btg1,Bzw1,CH29-166C20.9-001,Cacna1b,Calm1,Calm2,Cat,Catsper2,Ccnl1,Cd27,Cdk12,Cdk13,Cenpv,Chrnb1,Cirbp,Cited2,Cul5,Ddit3,Ddit4,Ddx5,Dusp1,Eef1e1,Efcab4b,Efna2,Ehmt1,Eif4g2,Elmod1,Fbxw7,Fgfbp3,Fubp1,G630025P09Rik,Gadd45g,Gata2,Gdf3,Gmeb1,Gpr87,Gtf2f1,H2-Oa,H2afx,Hbegf,Hfe,Hist1h3a,Hist1h3e,Hist1h3f,H…	NA	NA	NA	NA
GO Biological Process	cell communication				0								NA	NA	NA	Abat,Acvr2b,Adam24,Adra2a,Afg3l2,Alms1,Anapc2,Angpt2,Aph1a,Arfgef2,Arhgap20,Arhgap22,Asb16,Axl,Barx1,Bckdk,Bhlha15,Boc,Bst2,Cacna1d,Cacnb4,Camk1,Cd79a,Cdc42bpg,Celsr1,Cer1,Chat,Chrm4,Chrna10,Cib1,Col1a1,Crem,Csrnp1,Dcdc2c,Ddr2,Dhh,Drd4,Dspp,Duox1,Duox2,Dvl3,Eid2,Eif2ak3,Eif2b5,Entpd2,Epha5,Ercc6,Ern1,Fads1,Fam13b,Fgr,Fibcd1,Fkbp8,Flt4,Fzd10,Fzd3,Galp,Galr1,Gata4,Gm10670,Gm16451,Gm4144,Gm4175,Gm41…	NA	NA	NA	NA	NA	NA	NA
GO Biological Process	cellular response to stimulus				0								NA	NA	NA	Acd,Acvr2b,Adam24,Adra2a,Afap1,Ahsg,Alms1,Angpt2,Aph1a,Arfgef2,Arhgap20,Arhgap22,Asb16,Axl,Bak1,Bckdk,Bhlha15,Boc,Brip1,Bst2,C330006K01Rik,Cacna1d,Cacnb4,Camk1,Cd79a,Cdc42bpg,Cebpb,Celsr1,Cer1,Chrm4,Cib1,Clpb,Col1a1,Crem,Csrnp1,Dcdc2c,Ddr2,Drd4,Dspp,Duox1,Duox2,Dvl3,Eepd1,Eid2,Eif2ak3,Eif2b5,Enpp1,Entpd2,Epha5,Ercc6,Ern1,Eya1,Fads1,Fam13b,Fanca,Fdx1,Fgr,Fibcd1,Fkbp8,Flt4,Fzd10,Fzd3,Galp,Galr1,Gat…	NA	NA	NA	NA	NA	NA	NA
GO Biological Process	multicellular organismal process				0		0						NA	NA	NA	Abat,Acd,Acvr2b,Adam24,Adra2a,Afg3l2,Agpat6,Agr2,Ahsg,Alms1,Anapc2,Angpt2,Aph1a,Aqp7,Arhgap22,Aspn,Atp8b3,Axl,Bak1,Barx1,Bcl11a,Best2,Bgn,Bhlhe22,Bik,Bmp1,Boc,Bves,Bzw2,Cacna1d,Cacnb4,Camk1,Car2,Cby1,Cd79a,Cdh4,Cebpb,Celsr1,Cer1,Cfdp1,Chat,Chrdl1,Chrna10,Col1a1,Colec11,Cpe,Crem,Crtam,Crygf,Csrnp1,Ctnnbl1,Ctsz,Cyp7b1,Dad1,Ddr2,Dfnb59,Dhh,Dmp1,Dpf1,Drd4,Dspp,Duox1,Duox2,Dvl3,Dyrk1b,Ebf4,Edf1,Efhd1,…	NA	4930408F14Rik,Aaas,Aatf,Ablim1,Acat1,Accn2,Acvr2a,Adam1a,Adam26a,Adamts2,Adap2,Adcy1,Adcy5,Adcyap1r1,Adora2b,Adora3,Adra1b,Adrm1,Afp,Agt,Ahr,Akr1d1,Alcam,Aldh1a3,Alg5,Alox15,Alpl,Alx1,Angpt1,Ank1,Ank3,Anks1,Anxa2,Apba3,Apob,Apoh,App,Areg,Arfrp1,Arih2,Ascl1,Atm,Atoh1,Atoh8,Atp6v0a4,Avp,B3gnt5,Bai2,Basp1,Bcan,Bcl11b,Bcl2,Bcl2a1d,Bfsp2,Bicc1,Bmp15,Bmp3,Bmper,Bmpr1b,Bptf,Cacng4,Cad,Camk1d,Camk4,Card1…	NA	NA	NA	NA	NA
GO Biological Process	regulation of biological process				0			0					NA	NA	NA	1500010J02Rik,3110052M02Rik,4933415F23Rik,Acd,Acvr2b,Adam24,Adra2a,Afap1,Afg3l2,Agpat6,Ahsg,Alms1,Anapc2,Angpt2,Aph1a,Arfgef2,Arfip1,Arhgap20,Arhgap22,Arhgdig,Arid3c,Armc10,Asb16,Ascc2,Aspn,Aspscr1,Atf6,Atxn3,Axl,BC089491,Bak1,Barx1,Batf2,Bbx,Bckdk,Bcl11a,Bhlha15,Bhlhe22,Bik,Birc7,Bmp1,Boc,Brf1,Brip1,Brpf1,Bst2,Bves,C030039L03Rik,C80913,Cacna1d,Cacnb4,Camk1,Camta1,Capzb,Car2,Casc3,Cast,Cby1,Cd79a…	NA	NA	2500003M10Rik,5330417C22Rik,Acvrl1,Aicda,Aimp1,Apobec1,Arl4a,Arrdc3,Banp,Bclaf1,Brdt,Btg1,Bzw1,CH29-166C20.9-001,Cacna1b,Calm1,Calm2,Cat,Catsper2,Ccnl1,Cd27,Cdk12,Cdk13,Cenpv,Chrnb1,Cirbp,Cited2,Ddit3,Ddit4,Ddx5,Dusp1,Eef1e1,Efcab4b,Efna2,Ehmt1,Eif4g2,Elmod1,Fbxw7,Fgfbp3,Fubp1,G630025P09Rik,Gadd45g,Gata2,Gdf3,Gmeb1,Gpr87,Gtf2f1,H2-Oa,H2afx,Hbegf,Hist1h3a,Hist1h3e,Hist1h3f,Hist1h4c,Hist1h4d,Hist1h…	NA	NA	NA	NA
GO Biological Process	regulation of cellular process				0			0					NA	NA	NA	1500010J02Rik,3110052M02Rik,4933415F23Rik,Acd,Acvr2b,Adam24,Adra2a,Afap1,Ahsg,Alms1,Anapc2,Angpt2,Aph1a,Arfgef2,Arfip1,Arhgap20,Arhgap22,Arhgdig,Arid3c,Asb16,Ascc2,Aspn,Atf6,Atxn3,Axl,BC089491,Bak1,Barx1,Batf2,Bbx,Bckdk,Bcl11a,Bhlha15,Bhlhe22,Bik,Birc7,Boc,Brf1,Brip1,Brpf1,Bst2,Bves,C030039L03Rik,C80913,Cacna1d,Cacnb4,Camk1,Camta1,Capzb,Car2,Casc3,Cby1,Cd79a,Cdc42bpg,Cdc42se2,Cdh4,Cebpb,Cebpd,Cel…	NA	NA	2500003M10Rik,5330417C22Rik,Acvrl1,Aicda,Aimp1,Apobec1,Arl4a,Arrdc3,Banp,Bclaf1,Brdt,Btg1,Bzw1,CH29-166C20.9-001,Cacna1b,Calm1,Calm2,Cat,Catsper2,Ccnl1,Cd27,Cdk12,Cdk13,Cenpv,Chrnb1,Cirbp,Cited2,Ddit3,Ddit4,Ddx5,Dusp1,Eef1e1,Efcab4b,Efna2,Ehmt1,Eif4g2,Elmod1,Fbxw7,Fgfbp3,Fubp1,G630025P09Rik,Gadd45g,Gata2,Gmeb1,Gpr87,Gtf2f1,H2-Oa,H2afx,Hbegf,Hist1h3a,Hist1h3e,Hist1h3f,Hist1h4c,Hist1h4d,Hist1h4h,Hi…	NA	NA	NA	NA
GO Biological Process	response to chemical stimulus				0								NA	NA	NA	Aanat,Abat,Acvr2b,Adra2a,Adsl,Ahsg,Angpt2,Aqp7,Asna1,Atp4b,Bak1,Boc,Car2,Cdh4,Cebpb,Chat,Chrm4,Col1a1,Creb3l3,Cyp2d22,Cyp7b1,Dad1,Dhh,Drd4,Duox1,Duox2,Eif2ak3,Eif2b5,Enpp1,Epha5,Ercc6,Ern1,Etv4,Evl,Fabp3,Fads1,Fdx1,Flt4,Fzd3,Galp,Gata4,Gdap2,Gm4461,Gpr44,Grin1,Hmox1,Hnf1a,Ibsp,Igsf10,Il11ra1,Itpr3,Kcnmb4,Krt13,Krt14,Krt18,Krt19,Krt8,Lin28b,Lmna,Malt1,Mapk8,Mmp15,Mtor,Mvd,Myog,Neurog2,Nfasc,Nkx3-1…	NA	NA	NA	NA	NA	NA	NA
GO Biological Process	signaling				0								NA	NA	NA	Abat,Acvr2b,Adam24,Adra2a,Afg3l2,Alms1,Anapc2,Angpt2,Aph1a,Arfgef2,Arhgap20,Arhgap22,Asb16,Axl,Barx1,Bckdk,Bhlha15,Boc,Bst2,Cacna1d,Cacnb4,Camk1,Cd79a,Cdc42bpg,Celsr1,Cer1,Chat,Chrm4,Chrna10,Cib1,Crem,Csrnp1,Dcdc2c,Ddr2,Dhh,Drd4,Duox1,Duox2,Dvl3,Eid2,Eif2ak3,Eif2b5,Entpd2,Epha5,Ercc6,Ern1,Fam13b,Fgr,Fibcd1,Fkbp8,Flt4,Fzd10,Fzd3,Galp,Galr1,Gata4,Gm10670,Gm16451,Gm4144,Gm4175,Gm4175,Gm4177,Gm4179,G…	NA	NA	NA	NA	NA	NA	NA
GO Biological Process	signal transduction				0								NA	NA	NA	Acvr2b,Adam24,Adra2a,Alms1,Angpt2,Aph1a,Arfgef2,Arhgap20,Arhgap22,Asb16,Axl,Bckdk,Bhlha15,Boc,Bst2,Cacna1d,Cacnb4,Camk1,Cd79a,Cdc42bpg,Celsr1,Cer1,Chrm4,Cib1,Crem,Csrnp1,Dcdc2c,Ddr2,Drd4,Duox1,Duox2,Dvl3,Eid2,Eif2ak3,Entpd2,Epha5,Ercc6,Ern1,Fam13b,Fgr,Fibcd1,Fkbp8,Flt4,Fzd10,Fzd3,Galp,Galr1,Gata4,Gm10670,Gm16451,Gm4144,Gm4175,Gm4175,Gm4177,Gm4179,Gm4461,Gm4498,Gm6164,Gm8720,Gpr124,Gpr165,Gpr179,G…	NA	NA	NA	NA	NA	NA	NA
GO Molecular Function	G-protein coupled receptor activity				0								NA	NA	NA	Adra2a,Celsr1,Chrm4,Drd4,Fzd10,Fzd3,Galr1,Gm10670,Gm16451,Gm4144,Gm4175,Gm4175,Gm4177,Gm4179,Gm4498,Gm6164,Gm8720,Gpr124,Gpr165,Gpr179,Gpr25,Gpr37l1,Gpr44,Lphn3,Mrgprb1,Mrgprb2,Mrgprb3,Mrgprx2,Olfr1000,Olfr1002,Olfr1006,Olfr1009,Olfr1010,Olfr1012,Olfr1013,Olfr1014,Olfr1015,Olfr1016,Olfr1018,Olfr1019,Olfr1020,Olfr1022,Olfr1023,Olfr1024,Olfr1026,Olfr1028,Olfr1029,Olfr1030,Olfr1031,Olfr1032,Olfr1033…	NA	NA	NA	NA	NA	NA	NA
GO Molecular Function	pheromone receptor activity				4.42266e-146			1.03869e-90					NA	NA	NA	Gm10670,Gm16451,Gm4175,Gm4175,Gm6164,Gm8720,Vmn1r10,Vmn1r11,Vmn1r125,Vmn1r129,Vmn1r13,Vmn1r14,Vmn1r149,Vmn1r151,Vmn1r159,Vmn1r4,Vmn1r5,Vmn1r55,Vmn1r56,Vmn1r57,Vmn1r6,Vmn1r64,Vmn1r65,Vmn1r7,Vmn1r8,Vmn1r9,Vmn1r93	NA	NA	V1rg10,Vmn1r66,Vmn1r67,Vmn1r68,Vmn1r69,Vmn1r70,Vmn1r71,Vmn1r72,Vmn1r73,Vmn1r74,Vmn1r75,Vmn1r76,Vmn1r77,Vmn1r78,Vmn1r80,Vmn1r81,Vmn1r82,Vmn1r83,Vmn1r84	NA	NA	NA	NA
GO Molecular Function	receptor activity				0								NA	NA	NA	Acvr2b,Adra2a,Axl,BC006779,Cd209c,Cd79a,Celsr1,Chrm4,Chrna10,Ddr2,Drd4,Enpp1,Epha5,Flt4,Fzd10,Fzd3,Galr1,Gm10670,Gm16451,Gm4144,Gm4175,Gm4175,Gm4177,Gm4179,Gm4461,Gm4498,Gm6164,Gm8720,Gpr124,Gpr165,Gpr179,Gpr25,Gpr37l1,Gpr44,Grin1,Grk1,Igsf10,Il11ra1,Il20ra,Itgae,Itpr3,Lmbr1l,Lphn3,Lrpap1,Med13,Mrgprb1,Mrgprb2,Mrgprb3,Mrgprx2,Ms4a10,Ms4a13,Ms4a15,Ms4a8a,Nkx3-1,Nr1h2,Nr2c2ap,Olfr1000,Olfr1002,Olfr…	NA	NA	NA	NA	NA	NA	NA
GO Molecular Function	3-beta-hydroxy-delta5-steroid dehydrogenase activity					2.51e-26							NA	NA	NA	NA	Hsd3b1,Hsd3b2,Hsd3b5,Hsd3b6,Nsdhl	NA	NA	NA	NA	NA	NA
GO Biological Process	anatomical structure development						0						NA	NA	NA	NA	NA	Ablim1,Acat1,Acvr2a,Adamts2,Adap2,Adcy1,Adra1b,Adrm1,Afp,Agt,Ahr,Alcam,Aldh1a3,Alox15,Alpl,Alx1,Angpt1,Ank1,Ank3,Anks1,Anxa2,Apob,Apoh,App,Areg,Arfrp1,Arih2,Ascl1,Atm,Atoh1,Atoh8,B3gnt5,Bai2,Basp1,Bcan,Bcl11b,Bcl2,Bcl2a1d,Bfsp2,Bmp15,Bmp3,Bmper,Bmpr1b,Bptf,Cad,Camk1d,Camk4,Card11,Cav2,Cbfb,Cck,Ccl12,Ccnb1,Ccnb1ip1,Cd1d1,Cd24a,Cd3d,Cd3e,Cdh1,Chad,Chkb,Chrd,Cnga3,Cnnm4,Cnp,Col19a1,Col3a1,Col8a2,Col…	NA	NA	NA	NA	NA
GO Biological Process	axon guidance						1.83158e-136						NA	NA	NA	NA	NA	Ablim1,Alcam,Ank3,App,Atoh1,Bmpr1b,Cxcl12,Dcc,Dlx5,Efna5,Enah,Ephb1,Fezf1,Foxd1,Gap43,Gas1,Gdf7,Gli3,Isl2,Lgi1,Lhx1,Lmx1a,Plxna4,Prrxl1,Ptprm,Pvrl1,Rac1,Robo1,Sema5a,Sema6a,Unc5a,Wnt5a	NA	NA	NA	NA	NA
GO Biological Process	axonogenesis						2.40061e-228						NA	NA	NA	NA	NA	Ablim1,Adcy1,Alcam,Ank3,App,Atoh1,Bcl11b,Bcl2,Bmpr1b,Cck,Cnp,Cxcl12,D3Bwg0562e,Dcc,Dclk1,Dlx5,Drd2,Efna5,Enah,Epha3,Ephb1,Fezf1,Foxd1,Foxn4,Gap43,Gas1,Gdf7,Gli3,Isl2,Lgi1,Lhx1,Lmx1a,Ndn,Nefl,Nkx2-9,Nptx1,Ntng2,Plxna4,Prkca,Prrxl1,Ptpn11,Ptprm,Ptprz1,Pvrl1,Rac1,Robo1,Rtn4rl1,Sema5a,Sema6a,Slitrk1,Slitrk2,Slitrk6,Unc5a,Wnt5a	NA	NA	NA	NA	NA
GO Biological Process	branching morphogenesis of a tube						1.91012e-149						NA	NA	NA	NA	NA	Agt,Ahr,Angpt1,Areg,Bcl2,Ctsh,Cxcl12,Dicer1,Esr1,Foxd1,Gdf7,Gdnf,Gli3,Grem1,Gzf1,Ilk,Lama1,Lhx1,Mks1,Msx2,Nfatc4,Pax2,Pgr,Phb2,Pitx2,Rbm15,Rdh10,Rspo2,Sema5a,Sox9,Spry2,Src,Tbx3,Tcf21,Wnt5a	NA	NA	NA	NA	NA
GO Biological Process	cell development						0						NA	NA	NA	NA	NA	Ablim1,Adcy1,Adrm1,Agt,Alcam,Alx1,Ank1,Ank3,Anks1,App,Areg,Arih2,Ascl1,Atoh1,Bcl11b,Bcl2,Bfsp2,Bmp15,Bmpr1b,Cav2,Cbfb,Cck,Ccnb1,Ccnb1ip1,Cd24a,Cdh1,Cnga3,Cnp,Cst3,Cxadr,Cxcl12,D3Bwg0562e,Dcc,Dclk1,Dgkg,Dicer1,Dlg2,Dlx5,Drd1a,Drd2,Efna5,En1,Enah,Eomes,Epha1,Epha3,Ephb1,Ereg,Esr1,Fezf1,Fgfr1,Fndc3a,Foxd1,Foxn4,Gap43,Gas1,Gdf11,Gdf7,Gdnf,Ghrl,Gja1,Gli3,Gnao1,Grem1,Grin3a,Hoxb13,Id4,Ilk,Impad1,Isl2,K…	NA	NA	NA	NA	NA
GO Biological Process	cell differentiation						0						NA	NA	NA	NA	NA	A2m,Ablim1,Adam26a,Adcy1,Adcyap1r1,Adrm1,Agt,Ahr,Alcam,Alx1,Angpt1,Ank1,Ank3,Anks1,App,Areg,Arih2,Ascl1,Atm,Atoh1,Atoh8,Basp1,Bcl11b,Bcl2,Bcl2a1d,Bfsp2,Bmp15,Bmp3,Bmpr1b,Bnip3,Camk1d,Camk4,Card11,Catsper3,Cav2,Cbfb,Cck,Ccna1,Ccnb1,Ccnb1ip1,Cd1d1,Cd24a,Cd3d,Cd3e,Cdh1,Chrd,Cnga3,Cnp,Col19a1,Col9a1,Creb3l2,Crhr1,Cst3,Cxadr,Cxcl12,Cyp24a1,D1Pas1,D3Bwg0562e,Dbx1,Dcc,Dclk1,Dgkg,Dhrs2,Dicer1,Dlg2,Dlx5,D…	NA	NA	NA	NA	NA
GO Biological Process	cell morphogenesis						0						NA	NA	NA	NA	NA	Ablim1,Adcy1,Ahr,Alcam,Ank3,App,Atoh1,Bcl11b,Bcl2,Bmpr1b,Cck,Cnp,Csnk1a1,Cxcl12,D3Bwg0562e,Dcc,Dclk1,Dicer1,Dlx5,Drd2,Efna5,Enah,Eomes,Epha1,Epha3,Ephb1,Fezf1,Foxd1,Foxn4,Gap43,Gas1,Gdf7,Gdnf,Gja1,Gje1,Gli3,Grem1,Ift88,Ilk,Isl2,Lgi1,Lhx1,Lmx1a,Mertk,Mks1,Msx2,Ndn,Nefl,Nes,Nkx2-9,Nox4,Nptx1,Nrg1,Ntng2,Ofd1,Parva,Pax2,Pcdh15,Pla2g3,Plxna4,Prkca,Prox1,Prrxl1,Ptpn11,Ptpn23,Ptprm,Ptprz1,Pvrl1,Rac1,Rob…	NA	NA	NA	NA	NA
GO Biological Process	cell morphogenesis involved in differentiation						1.56209e-287						NA	NA	NA	NA	NA	Ablim1,Adcy1,Alcam,Ank3,App,Atoh1,Bcl11b,Bcl2,Bmpr1b,Cck,Cnp,Cxcl12,D3Bwg0562e,Dcc,Dclk1,Dlx5,Drd2,Efna5,Enah,Eomes,Epha1,Epha3,Ephb1,Fezf1,Foxd1,Foxn4,Gap43,Gas1,Gdf7,Gdnf,Gja1,Gli3,Grem1,Ilk,Isl2,Lgi1,Lhx1,Lmx1a,Mertk,Msx2,Ndn,Nefl,Nkx2-9,Nptx1,Ntng2,Pax2,Pcdh15,Plxna4,Prkca,Prox1,Prrxl1,Ptpn11,Ptprm,Ptprz1,Pvrl1,Rac1,Robo1,Rtn4rl1,Sdc2,Sema5a,Sema6a,Sfrp1,Slitrk1,Slitrk2,Slitrk6,Sox9,Spr,Unc5a…	NA	NA	NA	NA	NA
GO Biological Process	cell morphogenesis involved in neuron differentiation						1.42313e-239						NA	NA	NA	NA	NA	Ablim1,Adcy1,Alcam,Ank3,App,Atoh1,Bcl11b,Bcl2,Bmpr1b,Cck,Cnp,Cxcl12,D3Bwg0562e,Dcc,Dclk1,Dlx5,Drd2,Efna5,Enah,Epha3,Ephb1,Fezf1,Foxd1,Foxn4,Gap43,Gas1,Gdf7,Gli3,Isl2,Lgi1,Lhx1,Lmx1a,Ndn,Nefl,Nkx2-9,Nptx1,Ntng2,Pcdh15,Plxna4,Prkca,Prrxl1,Ptpn11,Ptprm,Ptprz1,Pvrl1,Rac1,Robo1,Rtn4rl1,Sdc2,Sema5a,Sema6a,Slitrk1,Slitrk2,Slitrk6,Spr,Unc5a,Wnt5a	NA	NA	NA	NA	NA
GO Biological Process	cell part morphogenesis						1.21856e-300						NA	NA	NA	NA	NA	Ablim1,Adcy1,Alcam,Ank3,App,Atoh1,Bcl11b,Bcl2,Bmpr1b,Cck,Cnp,Cxcl12,D3Bwg0562e,Dcc,Dclk1,Dicer1,Dlx5,Drd2,Efna5,Enah,Epha3,Ephb1,Fezf1,Foxd1,Foxn4,Gap43,Gas1,Gdf7,Gja1,Gli3,Ift88,Ilk,Isl2,Lgi1,Lhx1,Lmx1a,Mks1,Ndn,Nefl,Nes,Nkx2-9,Nptx1,Ntng2,Nubpl,Ofd1,Parva,Pcdh15,Pla2g3,Plxna4,Prkca,Prrxl1,Ptpn11,Ptpn23,Ptprm,Ptprz1,Pvrl1,Rac1,Robo1,Rsph4a,Rtn4rl1,Sdc2,Sema5a,Sema6a,Slitrk1,Slitrk2,Slitrk6,Stk36…	NA	NA	NA	NA	NA
GO Biological Process	cell projection morphogenesis						2.26654e-297						NA	NA	NA	NA	NA	Ablim1,Adcy1,Alcam,Ank3,App,Atoh1,Bcl11b,Bcl2,Bmpr1b,Cck,Cnp,Cxcl12,D3Bwg0562e,Dcc,Dclk1,Dicer1,Dlx5,Drd2,Efna5,Enah,Epha3,Ephb1,Fezf1,Foxd1,Foxn4,Gap43,Gas1,Gdf7,Gja1,Gli3,Ift88,Ilk,Isl2,Lgi1,Lhx1,Lmx1a,Mks1,Ndn,Nefl,Nes,Nkx2-9,Nptx1,Ntng2,Ofd1,Parva,Pcdh15,Pla2g3,Plxna4,Prkca,Prrxl1,Ptpn11,Ptpn23,Ptprm,Ptprz1,Pvrl1,Rac1,Robo1,Rsph4a,Rtn4rl1,Sdc2,Sema5a,Sema6a,Slitrk1,Slitrk2,Slitrk6,Stk36,Ugt8a…	NA	NA	NA	NA	NA
GO Biological Process	cell projection organization						0						NA	NA	NA	NA	NA	Ablim1,Adcy1,Alcam,Ank3,App,Areg,Arhgap26,Arhgap42,Atoh1,Baiap2l1,Bcl11b,Bcl2,Bmpr1b,Capg,Cck,Cd24a,Cdh1,Cnp,Cxcl12,D3Bwg0562e,Dcc,Dclk1,Dicer1,Dlx5,Drd2,Efna5,Enah,Epha3,Ephb1,Fezf1,Fgfr1,Foxd1,Foxn4,Gap43,Gas1,Gdf7,Gdnf,Ghrl,Gja1,Gli3,Gnao1,Grin3a,Ift88,Ilk,Isl2,Itga6,Lama1,Lgi1,Lhx1,Lima1,Lmx1a,Mks1,Mtss1l,Myo6,Ndn,Nefl,Nes,Ngf,Nkx2-9,Nptx1,Npy,Ntng2,Ofd1,Parva,Pcdh15,Pgd,Pla2g3,Plekha1,Plxna4…	NA	NA	NA	NA	NA
GO Biological Process	cellular component morphogenesis						0						NA	NA	NA	NA	NA	Ablim1,Adcy1,Ahr,Alcam,Ank3,App,Atoh1,Bcl11b,Bcl2,Bmpr1b,Cck,Cnp,Csnk1a1,Cxcl12,D3Bwg0562e,Dcc,Dclk1,Dicer1,Dlx5,Drd2,Efna5,Enah,Eomes,Epha1,Epha3,Ephb1,Fezf1,Foxd1,Foxn4,Gap43,Gas1,Gdf7,Gdnf,Gja1,Gje1,Gli3,Grem1,Ift88,Ilk,Isl2,Lgi1,Lhx1,Lmx1a,Mertk,Mks1,Msx2,Myh6,Ndn,Neb,Nefl,Nes,Nkx2-9,Nox4,Nptx1,Nrg1,Ntng2,Nubpl,Ofd1,Parva,Pax2,Pcdh15,Pla2g3,Plxna4,Pmp22,Prkca,Prox1,Prrxl1,Ptpn11,Ptpn23,Ptprm,…	NA	NA	NA	NA	NA
GO Biological Process	cellular developmental process						0						NA	NA	NA	NA	NA	A2m,Ablim1,Adam26a,Adcy1,Adcyap1r1,Adrm1,Agt,Ahr,Alcam,Alx1,Angpt1,Ank1,Ank3,Anks1,App,Areg,Arih2,Ascl1,Atm,Atoh1,Atoh8,Basp1,Bcl11b,Bcl2,Bcl2a1d,Bfsp2,Bmp15,Bmp3,Bmpr1b,Bnip3,Camk1d,Camk4,Card11,Catsper3,Cav2,Cbfb,Cck,Ccna1,Ccnb1,Ccnb1ip1,Cd1d1,Cd24a,Cd3d,Cd3e,Cdh1,Chrd,Cnga3,Cnp,Col19a1,Col9a1,Creb3l2,Crhr1,Csnk1a1,Cst3,Cxadr,Cxcl12,Cyp24a1,D1Pas1,D3Bwg0562e,Dbx1,Dcc,Dclk1,Dgkg,Dhrs2,Dicer1,Dlg…	NA	NA	NA	NA	NA
GO Biological Process	developmental growth						1.62944e-173						NA	NA	NA	NA	NA	Agt,Ahr,App,Areg,Arih2,Bcl2,Bmpr1b,Ccnb1,Col9a1,Dclk1,Dmbt1,Dmbx1,Ereg,Esr1,Foxd1,Foxn4,Gap43,Gas1,Gja1,Gli3,Igfbp1,Lhx1,Lrp4,Mstn,Msx2,Ndn,Nipbl,Pgcp,Prkcq,Prlr,Psap,Rarb,Rarg,Rdh10,Robo1,Smarca4,Sox9,Taf8,Thbs1,Tm4sf4,Wnt5a	NA	NA	NA	NA	NA
GO Biological Process	developmental process						0						NA	NA	NA	NA	NA	1500015O10Rik,A2m,Aatf,Ablim1,Acat1,Acvr2a,Adam26a,Adamts2,Adap2,Adcy1,Adcyap1r1,Adra1b,Adrm1,Afp,Agt,Ahr,Alcam,Aldh1a3,Alg5,Alox15,Alpl,Alx1,Angpt1,Ank1,Ank3,Anks1,Anxa2,Apba3,Apob,Apoh,App,Areg,Arfrp1,Arih2,Ascl1,Atm,Atoh1,Atoh8,Atr,B3gnt5,Bai2,Basp1,Bcan,Bcl11b,Bcl2,Bcl2a1d,Bfsp2,Bicc1,Bmp15,Bmp3,Bmper,Bmpr1b,Bnip3,Bptf,Cad,Camk1d,Camk4,Card11,Catsper3,Cav2,Cbfb,Cck,Ccl12,Ccna1,Ccnb1,Ccnb1ip1,…	NA	NA	NA	NA	NA
GO Biological Process	embryonic limb morphogenesis						6.152e-129						NA	NA	NA	NA	NA	Alx1,Crabp2,Dicer1,Dlx5,Dlx6,En1,Fbn2,Fgfr1,Gas1,Gli3,Grem1,Ift88,Impad1,Lmx1b,Lrp4,Msx2,Nipbl,Osr1,Pitx1,Pitx2,Prrx1,Rarb,Rarg,Rdh10,Rspo2,Smarca4,Tbx3,Trp63,Tulp3,Wnt5a	NA	NA	NA	NA	NA
GO Biological Process	epidermal cell differentiation						2.11063e-110						NA	NA	NA	NA	NA	Bcl11b,Foxi3,Gprc5d,Gsdma3,Hrnr,Ivl,Lor,Ppl,Sav1,Smarca4,Sprr1a,Sprr1b,Sprr2a1,Sprr2b,Sprr2d,Sprr2e,Sprr2f,Sprr2h,Sprr2i,Sprr2j-ps,Sprr2k,Sprr4,Trp63,Wnt5a	NA	NA	NA	NA	NA
GO Biological Process	epithelial cell differentiation						3.86058e-217						NA	NA	NA	NA	NA	Agt,Ascl1,Basp1,Bcl11b,Crhr1,Dicer1,Dlx5,Dlx6,Esr1,Gata6,Gdf7,Gdnf,Gja1,Gprc5d,Grem1,Hoxb13,Hrnr,Ivl,Krt10,Lama1,Lor,Mgmt,Msi1,Pax2,Pgr,Ppl,Prlr,Prox1,Psap,Rac1,Sav1,Smarca4,Sprr1a,Sprr1b,Sprr2a1,Sprr2b,Sprr2d,Sprr2e,Sprr2f,Sprr2h,Sprr2i,Sprr2j-ps,Sprr2k,Sprr4,Tcf21,Trp63,Upk1b,Upk2,Wdr77,Wnt5a	NA	NA	NA	NA	NA
GO Biological Process	epithelium development						0						NA	NA	NA	NA	NA	Acat1,Agt,Ahr,Aldh1a3,Alx1,Angpt1,Areg,Ascl1,Basp1,Bcl11b,Bcl2,Crhr1,Ctsh,Cxcl12,Dicer1,Dlx5,Dlx6,Enah,Esr1,Fgfr1,Foxd1,Gata6,Gdf7,Gdnf,Gja1,Gli3,Gprc5d,Grem1,Gzf1,Hoxb13,Hrnr,Ilk,Ipmk,Irx1,Ivl,Krt10,Lama1,Lhx1,Lor,Mgmt,Msi1,Msx2,Nfatc4,Osr1,Pax2,Pcdh15,Pgr,Phb2,Pitx2,Plxna1,Ppl,Prlr,Prox1,Psap,Rac1,Rarg,Rbm15,Rdh10,Rgma,Robo1,Rspo2,Rspo3,Sav1,Sema5a,Sfrp1,Smarca4,Sox8,Sox9,Sprr1a,Sprr1b,Sprr2a1,…	NA	NA	NA	NA	NA
GO Biological Process	generation of neurons						0						NA	NA	NA	NA	NA	Ablim1,Adcy1,Alcam,Ank3,Anks1,App,Areg,Ascl1,Atoh1,Bcl11b,Bcl2,Bmpr1b,Camk1d,Cck,Cd24a,Cdh1,Cnga3,Cnp,Cxcl12,D3Bwg0562e,Dbx1,Dcc,Dclk1,Dgkg,Dicer1,Dlg2,Dlx5,Drd1a,Drd2,Drd3,Dynlt1a,Dynlt1c,Efna5,Emx1,En1,Enah,Eomes,Epha3,Ephb1,Evx1,Fezf1,Fgfr1,Foxd1,Foxn4,Gap43,Gas1,Gas6,Gdf11,Gdf7,Gdnf,Gfi1,Ghrl,Gja1,Gli3,Gnao1,Golga2,Grin3a,Grm5,Gsx2,Id4,Ifng,Ilk,Inpp5j,Isl2,Kcnma1,Lama1,Lgi1,Lhx1,Lhx8,Lin28a,L…	NA	NA	NA	NA	NA
GO Biological Process	limb development						2.35228e-144						NA	NA	NA	NA	NA	Alx1,Bmpr1b,Crabp2,Dicer1,Dlx5,Dlx6,En1,Fbn2,Fgfr1,Fmn1,Gas1,Gja1,Gli3,Grem1,Ift88,Impad1,Lmx1b,Lrp4,Msx2,Nipbl,Osr1,Pitx1,Pitx2,Prrx1,Rarb,Rarg,Rdh10,Rspo2,Smarca4,Sox9,Tbx3,Trp63,Tulp3,Wnt5a	NA	NA	NA	NA	NA
GO Biological Process	limb morphogenesis						5.63339e-145						NA	NA	NA	NA	NA	Alx1,Bmpr1b,Crabp2,Dicer1,Dlx5,Dlx6,En1,Fbn2,Fgfr1,Fmn1,Gas1,Gja1,Gli3,Grem1,Ift88,Impad1,Lmx1b,Lrp4,Msx2,Nipbl,Osr1,Pitx1,Pitx2,Prrx1,Rarb,Rarg,Rdh10,Rspo2,Smarca4,Sox9,Tbx3,Trp63,Tulp3,Wnt5a	NA	NA	NA	NA	NA
GO Biological Process	morphogenesis of a branching epithelium						9.59397e-163						NA	NA	NA	NA	NA	Agt,Ahr,Angpt1,Areg,Bcl2,Ctsh,Cxcl12,Esr1,Fgfr1,Foxd1,Gdnf,Gli3,Grem1,Gzf1,Hoxb13,Ilk,Lama1,Lhx1,Msx2,Nfatc4,Pax2,Pgr,Phb2,Pitx2,Plxna1,Rbm15,Rdh10,Rspo2,Rspo3,Sema5a,Sfrp1,Sox8,Sox9,Src,Tbx3,Tcf21,Trp63,Wnt5a	NA	NA	NA	NA	NA
GO Biological Process	morphogenesis of a branching structure						1.76059e-183						NA	NA	NA	NA	NA	Agt,Ahr,Angpt1,Areg,Bcl2,Ctsh,Cxcl12,Dicer1,Drd2,Esr1,Fgfr1,Foxd1,Gdf7,Gdnf,Gli3,Grem1,Gzf1,Hoxb13,Ilk,Lama1,Lhx1,Mks1,Msx2,Nfatc4,Pax2,Pgr,Phb2,Pitx2,Plxna1,Rbm15,Rdh10,Rspo2,Rspo3,Sema5a,Sfrp1,Sox8,Sox9,Spry2,Src,Tbx3,Tcf21,Trp63,Wnt5a	NA	NA	NA	NA	NA
GO Biological Process	multicellular organismal development						0						NA	NA	NA	NA	NA	Aatf,Ablim1,Acat1,Acvr2a,Adam26a,Adamts2,Adap2,Adcy1,Adcyap1r1,Adra1b,Adrm1,Afp,Agt,Ahr,Alcam,Aldh1a3,Alg5,Alox15,Alpl,Alx1,Angpt1,Ank1,Ank3,Anks1,Anxa2,Apba3,Apob,Apoh,App,Areg,Arfrp1,Arih2,Ascl1,Atm,Atoh1,Atoh8,B3gnt5,Bai2,Basp1,Bcan,Bcl11b,Bcl2,Bcl2a1d,Bfsp2,Bicc1,Bmp15,Bmp3,Bmper,Bmpr1b,Bptf,Cad,Camk1d,Camk4,Card11,Catsper3,Cav2,Cbfb,Cck,Ccl12,Ccna1,Ccnb1,Ccnb1ip1,Cd1d1,Cd24a,Cd3d,Cd3e,Cdh1,C…	NA	NA	NA	NA	NA
GO Biological Process	neuron development						0						NA	NA	NA	NA	NA	Ablim1,Adcy1,Alcam,Ank3,Anks1,App,Areg,Ascl1,Atoh1,Bcl11b,Bcl2,Bmpr1b,Cck,Cd24a,Cdh1,Cnga3,Cnp,Cxcl12,D3Bwg0562e,Dcc,Dclk1,Dgkg,Dicer1,Dlg2,Dlx5,Drd1a,Drd2,Efna5,En1,Enah,Epha3,Ephb1,Fezf1,Fgfr1,Foxd1,Foxn4,Gap43,Gas1,Gdf7,Gdnf,Ghrl,Gja1,Gli3,Gnao1,Grin3a,Ilk,Isl2,Lama1,Lgi1,Lhx1,Lhx8,Lmx1a,Lmx1b,Myo6,Ndn,Nefl,Neurod2,Ngf,Nkx2-9,Nptx1,Npy,Ntng2,Pcdh15,Pgd,Pitx3,Plxna4,Prkca,Prrxl1,Ptpn11,Ptprm,Pt…	NA	NA	NA	NA	NA
GO Biological Process	neuron differentiation						0						NA	NA	NA	NA	NA	Ablim1,Adcy1,Alcam,Ank3,Anks1,App,Areg,Ascl1,Atoh1,Bcl11b,Bcl2,Bmpr1b,Cck,Cd24a,Cdh1,Cnga3,Cnp,Cxcl12,D3Bwg0562e,Dbx1,Dcc,Dclk1,Dgkg,Dicer1,Dlg2,Dlx5,Drd1a,Drd2,Efna5,Emx1,En1,Enah,Eomes,Epha3,Ephb1,Evx1,Fezf1,Fgfr1,Foxd1,Foxn4,Gap43,Gas1,Gdf7,Gdnf,Gfi1,Ghrl,Gja1,Gli3,Gnao1,Grin3a,Gsx2,Id4,Ilk,Isl2,Kcnma1,Lama1,Lgi1,Lhx1,Lhx8,Lmx1a,Lmx1b,Mcoln3,Myo6,Ndn,Nefl,Neurod2,Ngf,Nkx2-9,Nptx1,Npy,Nrg1,Ntng…	NA	NA	NA	NA	NA
GO Biological Process	neuron projection development						4.85833100141916e-315						NA	NA	NA	NA	NA	Ablim1,Adcy1,Alcam,Ank3,App,Areg,Atoh1,Bcl11b,Bcl2,Bmpr1b,Cck,Cd24a,Cdh1,Cnp,Cxcl12,D3Bwg0562e,Dcc,Dclk1,Dicer1,Dlx5,Drd2,Efna5,Enah,Epha3,Ephb1,Fezf1,Fgfr1,Foxd1,Foxn4,Gap43,Gas1,Gdf7,Gdnf,Ghrl,Gja1,Gli3,Gnao1,Grin3a,Ilk,Isl2,Lama1,Lgi1,Lhx1,Lmx1a,Myo6,Ndn,Nefl,Ngf,Nkx2-9,Nptx1,Npy,Ntng2,Pgd,Plxna4,Prkca,Prrxl1,Ptpn11,Ptprm,Ptprz1,Pvrl1,Rac1,Rasgrf1,Robo1,Rtn4rl1,Scarf1,Sdc2,Sema5a,Sema6a,Slitrk…	NA	NA	NA	NA	NA
GO Biological Process	neuron projection morphogenesis						1.60244e-252						NA	NA	NA	NA	NA	Ablim1,Adcy1,Alcam,Ank3,App,Atoh1,Bcl11b,Bcl2,Bmpr1b,Cck,Cnp,Cxcl12,D3Bwg0562e,Dcc,Dclk1,Dicer1,Dlx5,Drd2,Efna5,Enah,Epha3,Ephb1,Fezf1,Foxd1,Foxn4,Gap43,Gas1,Gdf7,Gja1,Gli3,Ilk,Isl2,Lgi1,Lhx1,Lmx1a,Ndn,Nefl,Nkx2-9,Nptx1,Ntng2,Plxna4,Prkca,Prrxl1,Ptpn11,Ptprm,Ptprz1,Pvrl1,Rac1,Robo1,Rtn4rl1,Sdc2,Sema5a,Sema6a,Slitrk1,Slitrk2,Slitrk6,Ugt8a,Unc5a,Wee1,Wnt5a	NA	NA	NA	NA	NA
GO Biological Process	rhythmic process						1.1039e-180						NA	NA	NA	NA	NA	Adcy1,Adrm1,Afp,Agt,Ahr,Alb,Angpt1,Bcl2,Bhlhe41,Bmp15,Bmpr1b,Cckbr,Cst3,Drd1a,Drd2,Drd3,Edn2,Enox2,Ereg,Esr1,Ets1,F7,Fbxl21,Ghrl,Gnrh1,Grin2b,Grin3a,Kcnma1,Mstn,Mtnr1a,Nfil3,Oas1d,Pgr,Plekha1,Prok1,Sfrp1,Sgpl1,Slc9a3,Sohlh1,Srrd,Timp4,Wnt5a,Zfx	NA	NA	NA	NA	NA
GO Biological Process	system development						0						NA	NA	NA	NA	NA	Ablim1,Acat1,Acvr2a,Adamts2,Adap2,Adcy1,Adra1b,Adrm1,Afp,Agt,Ahr,Alcam,Aldh1a3,Alox15,Alpl,Alx1,Angpt1,Ank1,Ank3,Anks1,Anxa2,Apob,Apoh,App,Areg,Arih2,Ascl1,Atm,Atoh1,Atoh8,B3gnt5,Bai2,Basp1,Bcan,Bcl11b,Bcl2,Bcl2a1d,Bfsp2,Bmp15,Bmp3,Bmper,Bmpr1b,Bptf,Cad,Camk1d,Camk4,Card11,Cav2,Cbfb,Cck,Ccl12,Ccnb1,Cd1d1,Cd24a,Cd3d,Cd3e,Cdh1,Chad,Chkb,Chrd,Cnga3,Cnnm4,Cnp,Col19a1,Col3a1,Col8a2,Col9a1,Creb3l2,Cst3…	NA	NA	NA	NA	NA
GO Biological Process	tissue development						0						NA	NA	NA	NA	NA	Acat1,Acvr2a,Adamts2,Adrm1,Agt,Ahr,Aldh1a3,Alox15,Alpl,Alx1,Angpt1,App,Areg,Ascl1,Basp1,Bcl11b,Bcl2,Bmp3,Bmpr1b,Bptf,Cav2,Ccnb1,Chad,Chrd,Cnnm4,Col19a1,Col3a1,Col9a1,Creb3l2,Crhr1,Ctsh,Cxadr,Cxcl12,Dcn,Dicer1,Dlx5,Dlx6,Enah,Eomes,Epha3,Esr1,Fgf1,Fgfr1,Foxd1,Foxi3,Foxj2,Foxm1,Foxn4,Foxo4,Foxo6,Foxr1,Gap43,Gata6,Gdf7,Gdnf,Ghrl,Gja1,Gli3,Gprc5d,Grem1,Gsdma3,Gzf1,Hoxb13,Hoxc13,Hrnr,Igfbp1,Ilk,Impad1,…	NA	NA	NA	NA	NA
GO Molecular Function	double-stranded RNA binding						1.84607e-76						NA	NA	NA	NA	NA	Adarb1,Adarb2,Cdkn2aip,Dgcr8,Dicer1,Drosha,Ilf3,Oas1a,Oas1b,Oas1c,Oas1d,Oas1e,Oas1g,Oas1h,Oas2,Oas3,Strbp	NA	NA	NA	NA	NA
GO Biological Process	myeloid cell differentiation							1.52306e-41					NA	NA	NA	NA	NA	NA	Cited2,Efna2,Jmjd6,Jun,Med1,Rps19,Tfrc,Tgfbr3,Vegfa	NA	NA	NA	NA
GO Biological Process	negative regulation of megakaryocyte differentiation							1.53514e-26					NA	NA	NA	NA	NA	NA	Hist1h4c,Hist1h4d,Hist1h4h,Hist1h4i,Hist1h4k	NA	NA	NA	NA
GO Biological Process	negative regulation of myeloid cell differentiation							3.96128e-29					NA	NA	NA	NA	NA	NA	Gata2,Hist1h4c,Hist1h4d,Hist1h4h,Hist1h4i,Hist1h4k	NA	NA	NA	NA
GO Biological Process	regulation of megakaryocyte differentiation							3.45733e-31					NA	NA	NA	NA	NA	NA	Gata2,Hist1h4c,Hist1h4d,Hist1h4h,Hist1h4i,Hist1h4k	NA	NA	NA	NA
GO Biological Process	response to calcium ion							8.8583e-44					NA	NA	NA	NA	NA	NA	Actb,Apobec1,Calm1,Calm2,Dusp1,Jun,Jund,S100a16,Sparc	NA	NA	NA	NA
GO Biological Process	response to inorganic substance							1.90778e-71					NA	NA	NA	NA	NA	NA	Actb,Apobec1,Calm1,Calm2,Cat,D730039F16Rik,Ddit3,Dusp1,Jun,Jund,S100a16,S100a8,S100a9,Sparc,Tfrc,Txnrd1	NA	NA	NA	NA
GO Biological Process	response to metal ion							5.80112e-59					NA	NA	NA	NA	NA	NA	Actb,Apobec1,Calm1,Calm2,D730039F16Rik,Dusp1,Jun,Jund,S100a16,S100a8,S100a9,Sparc,Tfrc	NA	NA	NA	NA
GO Biological Process	viral reproduction							3.1046e-48					NA	NA	NA	NA	NA	NA	CH29-166C20.9-001,Rraga,Zfp110,Zscan18,Zscan22,Zscan4b,Zscan4c,Zscan4d,Zscan4e,Zscan4f	NA	NA	NA	NA
GO Molecular Function	calcium-dependent protein binding							5.27377e-30					NA	NA	NA	NA	NA	NA	Calm1,Calm2,Ddx5,Plscr3,S100a4,S100a6	NA	NA	NA	NA
GO Molecular Function	DNA binding							6.23764e-220					NA	NA	NA	NA	NA	NA	Banp,Bclaf1,Btaf1,Cramp1l,Ddit3,Fbxo18,Fubp1,Fus,G3bp1,Gata2,Gmeb1,Gtf2f1,H2afx,H3f3a,H3f3b,Hist1h1t,Hist1h2ah,Hist1h2ai,Hist1h2bh,Hist1h3a,Hist1h3e,Hist1h3f,Hist1h4c,Hist1h4d,Hist1h4h,Hist1h4i,Hist1h4k,Hnrnpa2b1,Hnrnpab,Jun,Jund,Klf10,Klf7,Mbd6,Med1,Mnt,Ncl,Obfc2a,Polg2,Polr2a,Rcc1,Sfpq,Uhrf2,Zfand5,Zfhx3,Zfp110,Zfp329,Zik1,Zmat2,Zscan4c,Zscan4d,Zscan4f	NA	NA	NA	NA
GO Molecular Function	nucleic acid binding							0					NA	NA	NA	NA	NA	NA	2500003M10Rik,Aimp1,Ankhd1,Apobec1,Banp,Bclaf1,Btaf1,Cirbp,Cramp1l,Ddit3,Ddx5,Eef1a1,Eef1e1,Eif4g2,Eif5,Eprs,Fbxo18,Fubp1,Fus,G3bp1,Gata2,Gmeb1,Gtf2f1,H2afx,H3f3a,H3f3b,Hist1h1t,Hist1h2ah,Hist1h2ai,Hist1h2bh,Hist1h3a,Hist1h3e,Hist1h3f,Hist1h4c,Hist1h4d,Hist1h4h,Hist1h4i,Hist1h4k,Hnrnpa2b1,Hnrnpab,Jmjd6,Jun,Jund,Klf10,Klf7,Mbd6,Med1,Mnt,Ncl,Nhp2,Nop56,Obfc2a,Poldip3,Polg2,Polr2a,Ptbp1,Raly,Rcc1,Rp…	NA	NA	NA	NA
MSigDB Pathway	Actions of Nitric Oxide in the Heart							7.37171e-20					NA	NA	NA	NA	NA	NA	Calm1,Calm2,Hsp90aa1,Vegfa	NA	NA	NA	NA
MSigDB Pathway	Angiotensin II mediated activation of JNK Pathway via Pyk2 dependent signaling							4.15521e-25					NA	NA	NA	NA	NA	NA	Calm1,Calm2,Jun,Map2k1,Map2k2	NA	NA	NA	NA
MSigDB Pathway	fMLP induced chemokine gene expression in HMC-1 cells							1.34216e-19					NA	NA	NA	NA	NA	NA	Calm1,Calm2,Map2k1,Map2k2	NA	NA	NA	NA
MSigDB Pathway	Genes involved in Elongation and Processing of Capped Transcripts							3.2935e-36					NA	NA	NA	NA	NA	NA	Fus,Gtf2f1,Hnrnpa2b1,Polr2a,Ptbp1,Srsf2,Srsf3,Txnl4a	NA	NA	NA	NA
MSigDB Pathway	Genes involved in Metabolism of nitric oxide							9.53831e-16					NA	NA	NA	NA	NA	NA	Calm1,Calm2,Hsp90aa1	NA	NA	NA	NA
MSigDB Pathway	Genes involved in mRNA Splicing							6.09111e-37					NA	NA	NA	NA	NA	NA	Fus,Gtf2f1,Hnrnpa2b1,Polr2a,Ptbp1,Srsf2,Srsf3,Txnl4a	NA	NA	NA	NA
MSigDB Pathway	Genes involved in P2Y receptors							5.8499e-16					NA	NA	NA	NA	NA	NA	P2ry12,P2ry13,P2ry14	NA	NA	NA	NA
MSigDB Pathway	Genes involved in Signaling by EGFR							4.14954e-24					NA	NA	NA	NA	NA	NA	Cltc,Map2k1,Map2k2,Ubb,Ubc	NA	NA	NA	NA
MSigDB Pathway	Links between Pyk2 and Map Kinases							2.65256e-25					NA	NA	NA	NA	NA	NA	Calm1,Calm2,Jun,Map2k1,Map2k2	NA	NA	NA	NA
Pathway Commons	Activation of CaMK IV							3.72344e-11					NA	NA	NA	NA	NA	NA	Calm1,Calm2	NA	NA	NA	NA
Pathway Commons	Alpha9 beta1 integrin signaling events							1.60085e-153					NA	NA	NA	NA	NA	NA	Aicda,Calm1,Calm2,Cat,Cited2,Cltc,Ddit3,Ddit4,Ddx5,Dusp1,Gapdh,Gata2,Hsp90aa1,Hspa4,Jun,Jund,Kpna1,Map2k1,Map2k2,Mcl1,Med1,Ncl,Osm,Poldip3,Ptprj,Pycard,Rala,Rb1cc1,Rcc1,Smyd2,Stmn1,Tfrc,Tgfbr3,Vegfa,Ywhah,Zfand5	NA	NA	NA	NA
Pathway Commons	Arf6 downstream pathway							3.30354e-149					NA	NA	NA	NA	NA	NA	Aicda,Calm1,Calm2,Cat,Cited2,Cltc,Ddit3,Ddit4,Ddx5,Dusp1,Gapdh,Gata2,Hsp90aa1,Hspa4,Jun,Jund,Kpna1,Map2k1,Map2k2,Mcl1,Med1,Ncl,Poldip3,Ptprj,Pycard,Rala,Rb1cc1,Rcc1,Smyd2,Stmn1,Tfrc,Tgfbr3,Vegfa,Ywhah,Zfand5	NA	NA	NA	NA
Pathway Commons	Arf6 signaling events							3.30354e-149					NA	NA	NA	NA	NA	NA	Aicda,Calm1,Calm2,Cat,Cited2,Cltc,Ddit3,Ddit4,Ddx5,Dusp1,Gapdh,Gata2,Hsp90aa1,Hspa4,Jun,Jund,Kpna1,Map2k1,Map2k2,Mcl1,Med1,Ncl,Poldip3,Ptprj,Pycard,Rala,Rb1cc1,Rcc1,Smyd2,Stmn1,Tfrc,Tgfbr3,Vegfa,Ywhah,Zfand5	NA	NA	NA	NA
Pathway Commons	Arf6 trafficking events							3.30354e-149					NA	NA	NA	NA	NA	NA	Aicda,Calm1,Calm2,Cat,Cited2,Cltc,Ddit3,Ddit4,Ddx5,Dusp1,Gapdh,Gata2,Hsp90aa1,Hspa4,Jun,Jund,Kpna1,Map2k1,Map2k2,Mcl1,Med1,Ncl,Poldip3,Ptprj,Pycard,Rala,Rb1cc1,Rcc1,Smyd2,Stmn1,Tfrc,Tgfbr3,Vegfa,Ywhah,Zfand5	NA	NA	NA	NA
Pathway Commons	Aurora B signaling							1.26461e-24					NA	NA	NA	NA	NA	NA	H3f3a,H3f3b,Ncapd2,Ncl,Stmn1	NA	NA	NA	NA
Pathway Commons	Aurora C signaling							3.72344e-11					NA	NA	NA	NA	NA	NA	H3f3a,H3f3b	NA	NA	NA	NA
Pathway Commons	Beta1 integrin cell surface interactions							6.7334e-162					NA	NA	NA	NA	NA	NA	Aicda,Calm1,Calm2,Cat,Cited2,Cltc,Col6a2,Ddit3,Ddit4,Ddx5,Dusp1,Gapdh,Gata2,Hsp90aa1,Hspa4,Jun,Jund,Kpna1,Map2k1,Map2k2,Mcl1,Med1,Ncl,Osm,Poldip3,Ptprj,Pycard,Rala,Rb1cc1,Rcc1,Smyd2,Stmn1,Tfrc,Tgfbr3,Thbs2,Vegfa,Ywhah,Zfand5	NA	NA	NA	NA
Pathway Commons	CaMK IV-mediated phosphorylation of CREB							3.72344e-11					NA	NA	NA	NA	NA	NA	Calm1,Calm2	NA	NA	NA	NA
Pathway Commons	Cam-PDE 1 activation							1.37378e-11					NA	NA	NA	NA	NA	NA	Calm1,Calm2	NA	NA	NA	NA
Pathway Commons	Cellular roles of Anthrax toxin							6.93026e-21					NA	NA	NA	NA	NA	NA	Calm1,Calm2,Map2k1,Map2k2	NA	NA	NA	NA
Pathway Commons	Chromosome Maintenance							1.30005e-28					NA	NA	NA	NA	NA	NA	Hist1h4c,Hist1h4d,Hist1h4h,Hist1h4i,Hist1h4k,Nhp2	NA	NA	NA	NA
Pathway Commons	Class I PI3K signaling events							3.30354e-149					NA	NA	NA	NA	NA	NA	Aicda,Calm1,Calm2,Cat,Cited2,Cltc,Ddit3,Ddit4,Ddx5,Dusp1,Gapdh,Gata2,Hsp90aa1,Hspa4,Jun,Jund,Kpna1,Map2k1,Map2k2,Mcl1,Med1,Ncl,Poldip3,Ptprj,Pycard,Rala,Rb1cc1,Rcc1,Smyd2,Stmn1,Tfrc,Tgfbr3,Vegfa,Ywhah,Zfand5	NA	NA	NA	NA
Pathway Commons	Class I PI3K signaling events mediated by Akt							3.30354e-149					NA	NA	NA	NA	NA	NA	Aicda,Calm1,Calm2,Cat,Cited2,Cltc,Ddit3,Ddit4,Ddx5,Dusp1,Gapdh,Gata2,Hsp90aa1,Hspa4,Jun,Jund,Kpna1,Map2k1,Map2k2,Mcl1,Med1,Ncl,Poldip3,Ptprj,Pycard,Rala,Rb1cc1,Rcc1,Smyd2,Stmn1,Tfrc,Tgfbr3,Vegfa,Ywhah,Zfand5	NA	NA	NA	NA
Pathway Commons	Deposition of New CENPA-containing Nucleosomes at the Centromere							4.3643e-25					NA	NA	NA	NA	NA	NA	Hist1h4c,Hist1h4d,Hist1h4h,Hist1h4i,Hist1h4k	NA	NA	NA	NA
Pathway Commons	Downstream signaling of activated FGFR							1.51685e-19					NA	NA	NA	NA	NA	NA	Calm1,Calm2,Map2k1,Map2k2	NA	NA	NA	NA
Pathway Commons	EGFR-dependent Endothelin signaling events							1.41896e-149					NA	NA	NA	NA	NA	NA	Aicda,Calm1,Calm2,Cat,Cited2,Cltc,Ddit3,Ddit4,Ddx5,Dusp1,Gapdh,Gata2,Hsp90aa1,Hspa4,Jun,Jund,Kpna1,Map2k1,Map2k2,Mcl1,Med1,Ncl,Poldip3,Ptprj,Pycard,Rala,Rb1cc1,Rcc1,Smyd2,Stmn1,Tfrc,Tgfbr3,Vegfa,Ywhah,Zfand5	NA	NA	NA	NA
Pathway Commons	EGF receptor (ErbB1) signaling pathway							3.30354e-149					NA	NA	NA	NA	NA	NA	Aicda,Calm1,Calm2,Cat,Cited2,Cltc,Ddit3,Ddit4,Ddx5,Dusp1,Gapdh,Gata2,Hsp90aa1,Hspa4,Jun,Jund,Kpna1,Map2k1,Map2k2,Mcl1,Med1,Ncl,Poldip3,Ptprj,Pycard,Rala,Rb1cc1,Rcc1,Smyd2,Stmn1,Tfrc,Tgfbr3,Vegfa,Ywhah,Zfand5	NA	NA	NA	NA
Pathway Commons	Endothelins							1.40327e-149					NA	NA	NA	NA	NA	NA	Aicda,Calm1,Calm2,Cat,Cited2,Cltc,Ddit3,Ddit4,Ddx5,Dusp1,Gapdh,Gata2,Hsp90aa1,Hspa4,Jun,Jund,Kpna1,Map2k1,Map2k2,Mcl1,Med1,Ncl,Poldip3,Ptprj,Pycard,Rala,Rb1cc1,Rcc1,Smyd2,Stmn1,Tfrc,Tgfbr3,Vegfa,Ywhah,Zfand5	NA	NA	NA	NA
Pathway Commons	eNOS activation							3.15582e-16					NA	NA	NA	NA	NA	NA	Calm1,Calm2,Hsp90aa1	NA	NA	NA	NA
Pathway Commons	ErbB1 downstream signaling							3.30354e-149					NA	NA	NA	NA	NA	NA	Aicda,Calm1,Calm2,Cat,Cited2,Cltc,Ddit3,Ddit4,Ddx5,Dusp1,Gapdh,Gata2,Hsp90aa1,Hspa4,Jun,Jund,Kpna1,Map2k1,Map2k2,Mcl1,Med1,Ncl,Poldip3,Ptprj,Pycard,Rala,Rb1cc1,Rcc1,Smyd2,Stmn1,Tfrc,Tgfbr3,Vegfa,Ywhah,Zfand5	NA	NA	NA	NA
Pathway Commons	ErbB receptor signaling network							1.44445e-153					NA	NA	NA	NA	NA	NA	Aicda,Calm1,Calm2,Cat,Cited2,Cltc,Ddit3,Ddit4,Ddx5,Dusp1,Gapdh,Gata2,Hbegf,Hsp90aa1,Hspa4,Jun,Jund,Kpna1,Map2k1,Map2k2,Mcl1,Med1,Ncl,Poldip3,Ptprj,Pycard,Rala,Rb1cc1,Rcc1,Smyd2,Stmn1,Tfrc,Tgfbr3,Vegfa,Ywhah,Zfand5	NA	NA	NA	NA
Pathway Commons	Glypican 1 network							1.41472e-153					NA	NA	NA	NA	NA	NA	Aicda,Calm1,Calm2,Cat,Cited2,Cltc,Ddit3,Ddit4,Ddx5,Dusp1,Gapdh,Gata2,Hsp90aa1,Hspa4,Jun,Jund,Kpna1,Map2k1,Map2k2,Mcl1,Med1,Ncl,Poldip3,Ptprj,Pycard,Rala,Rb1cc1,Rcc1,Serpinc1,Smyd2,Stmn1,Tfrc,Tgfbr3,Vegfa,Ywhah,Zfand5	NA	NA	NA	NA
Pathway Commons	Glypican pathway							3.18941e-153					NA	NA	NA	NA	NA	NA	Aicda,Calm1,Calm2,Cat,Cited2,Cltc,Ddit3,Ddit4,Ddx5,Dusp1,Gapdh,Gata2,Hsp90aa1,Hspa4,Jun,Jund,Kpna1,Map2k1,Map2k2,Mcl1,Med1,Ncl,Poldip3,Ptprj,Pycard,Rala,Rb1cc1,Rcc1,Serpinc1,Smyd2,Stmn1,Tfrc,Tgfbr3,Vegfa,Ywhah,Zfand5	NA	NA	NA	NA
Pathway Commons	GMCSF-mediated signaling events							2.34836e-153					NA	NA	NA	NA	NA	NA	Aicda,Calm1,Calm2,Cat,Cited2,Cltc,Ddit3,Ddit4,Ddx5,Dusp1,Gapdh,Gata2,Hsp90aa1,Hspa4,Jun,Jund,Kpna1,Map2k1,Map2k2,Mcl1,Med1,Ncl,Osm,Poldip3,Ptprj,Pycard,Rala,Rb1cc1,Rcc1,Smyd2,Stmn1,Tfrc,Tgfbr3,Vegfa,Ywhah,Zfand5	NA	NA	NA	NA
Pathway Commons	HIF-1-alpha transcription factor network							1.30005e-28					NA	NA	NA	NA	NA	NA	Cited2,Gata2,Jun,Mcl1,Tfrc,Vegfa	NA	NA	NA	NA
Pathway Commons	Hypoxic and oxygen homeostasis regulation of HIF-1-alpha							3.06389e-33					NA	NA	NA	NA	NA	NA	Cited2,Gata2,Hsp90aa1,Jun,Mcl1,Tfrc,Vegfa	NA	NA	NA	NA
Pathway Commons	IFN-gamma pathway							1.46773e-149					NA	NA	NA	NA	NA	NA	Aicda,Calm1,Calm2,Cat,Cited2,Cltc,Ddit3,Ddit4,Ddx5,Dusp1,Gapdh,Gata2,Hsp90aa1,Hspa4,Jun,Jund,Kpna1,Map2k1,Map2k2,Mcl1,Med1,Ncl,Poldip3,Ptprj,Pycard,Rala,Rb1cc1,Rcc1,Smyd2,Stmn1,Tfrc,Tgfbr3,Vegfa,Ywhah,Zfand5	NA	NA	NA	NA
Pathway Commons	IGF1 pathway							1.44746e-149					NA	NA	NA	NA	NA	NA	Aicda,Calm1,Calm2,Cat,Cited2,Cltc,Ddit3,Ddit4,Ddx5,Dusp1,Gapdh,Gata2,Hsp90aa1,Hspa4,Jun,Jund,Kpna1,Map2k1,Map2k2,Mcl1,Med1,Ncl,Poldip3,Ptprj,Pycard,Rala,Rb1cc1,Rcc1,Smyd2,Stmn1,Tfrc,Tgfbr3,Vegfa,Ywhah,Zfand5	NA	NA	NA	NA
Pathway Commons	IL3-mediated signaling events							2.05732e-153					NA	NA	NA	NA	NA	NA	Aicda,Calm1,Calm2,Cat,Cited2,Cltc,Ddit3,Ddit4,Ddx5,Dusp1,Gapdh,Gata2,Hsp90aa1,Hspa4,Jun,Jund,Kpna1,Map2k1,Map2k2,Mcl1,Med1,Ncl,Osm,Poldip3,Ptprj,Pycard,Rala,Rb1cc1,Rcc1,Smyd2,Stmn1,Tfrc,Tgfbr3,Vegfa,Ywhah,Zfand5	NA	NA	NA	NA
Pathway Commons	IL5-mediated signaling events							1.43463e-149					NA	NA	NA	NA	NA	NA	Aicda,Calm1,Calm2,Cat,Cited2,Cltc,Ddit3,Ddit4,Ddx5,Dusp1,Gapdh,Gata2,Hsp90aa1,Hspa4,Jun,Jund,Kpna1,Map2k1,Map2k2,Mcl1,Med1,Ncl,Poldip3,Ptprj,Pycard,Rala,Rb1cc1,Rcc1,Smyd2,Stmn1,Tfrc,Tgfbr3,Vegfa,Ywhah,Zfand5	NA	NA	NA	NA
Pathway Commons	Insulin Pathway							3.30354e-149					NA	NA	NA	NA	NA	NA	Aicda,Calm1,Calm2,Cat,Cited2,Cltc,Ddit3,Ddit4,Ddx5,Dusp1,Gapdh,Gata2,Hsp90aa1,Hspa4,Jun,Jund,Kpna1,Map2k1,Map2k2,Mcl1,Med1,Ncl,Poldip3,Ptprj,Pycard,Rala,Rb1cc1,Rcc1,Smyd2,Stmn1,Tfrc,Tgfbr3,Vegfa,Ywhah,Zfand5	NA	NA	NA	NA
Pathway Commons	Integrin family cell surface interactions							5.77247e-166					NA	NA	NA	NA	NA	NA	Aicda,Calm1,Calm2,Cat,Cited2,Cltc,Col6a2,Ddit3,Ddit4,Ddx5,Dusp1,Gapdh,Gata2,Hsp90aa1,Hspa4,Icam2,Jun,Jund,Kpna1,Map2k1,Map2k2,Mcl1,Med1,Ncl,Osm,Poldip3,Ptprj,Pycard,Rala,Rb1cc1,Rcc1,Smyd2,Stmn1,Tfrc,Tgfbr3,Thbs2,Vegfa,Ywhah,Zfand5	NA	NA	NA	NA
Pathway Commons	Internalization of ErbB1							3.30354e-149					NA	NA	NA	NA	NA	NA	Aicda,Calm1,Calm2,Cat,Cited2,Cltc,Ddit3,Ddit4,Ddx5,Dusp1,Gapdh,Gata2,Hsp90aa1,Hspa4,Jun,Jund,Kpna1,Map2k1,Map2k2,Mcl1,Med1,Ncl,Poldip3,Ptprj,Pycard,Rala,Rb1cc1,Rcc1,Smyd2,Stmn1,Tfrc,Tgfbr3,Vegfa,Ywhah,Zfand5	NA	NA	NA	NA
Pathway Commons	LKB1 signaling events							1.53298e-149					NA	NA	NA	NA	NA	NA	Aicda,Calm1,Calm2,Cat,Cited2,Cltc,Ddit3,Ddit4,Ddx5,Dusp1,Gapdh,Gata2,Hsp90aa1,Hspa4,Jun,Jund,Kpna1,Map2k1,Map2k2,Mcl1,Med1,Ncl,Poldip3,Ptprj,Pycard,Rala,Rb1cc1,Rcc1,Smyd2,Stmn1,Tfrc,Tgfbr3,Vegfa,Ywhah,Zfand5	NA	NA	NA	NA
Pathway Commons	MAP kinase activation in TLR cascade							1.72617e-15					NA	NA	NA	NA	NA	NA	Jun,Map2k1,Map2k2	NA	NA	NA	NA
Pathway Commons	Meiosis							1.81064e-28					NA	NA	NA	NA	NA	NA	H2afx,Hist1h4c,Hist1h4d,Hist1h4h,Hist1h4i,Hist1h4k	NA	NA	NA	NA
Pathway Commons	Meiotic Recombination							7.92964e-30					NA	NA	NA	NA	NA	NA	H2afx,Hist1h4c,Hist1h4d,Hist1h4h,Hist1h4i,Hist1h4k	NA	NA	NA	NA
Pathway Commons	Meiotic Synapsis							1.32334e-29					NA	NA	NA	NA	NA	NA	H2afx,Hist1h4c,Hist1h4d,Hist1h4h,Hist1h4i,Hist1h4k	NA	NA	NA	NA
Pathway Commons	MEK activation							2.41822e-11					NA	NA	NA	NA	NA	NA	Map2k1,Map2k2	NA	NA	NA	NA
Pathway Commons	mTOR signaling pathway							3.30354e-149					NA	NA	NA	NA	NA	NA	Aicda,Calm1,Calm2,Cat,Cited2,Cltc,Ddit3,Ddit4,Ddx5,Dusp1,Gapdh,Gata2,Hsp90aa1,Hspa4,Jun,Jund,Kpna1,Map2k1,Map2k2,Mcl1,Med1,Ncl,Poldip3,Ptprj,Pycard,Rala,Rb1cc1,Rcc1,Smyd2,Stmn1,Tfrc,Tgfbr3,Vegfa,Ywhah,Zfand5	NA	NA	NA	NA
Pathway Commons	Nectin adhesion pathway							1.45876e-149					NA	NA	NA	NA	NA	NA	Aicda,Calm1,Calm2,Cat,Cited2,Cltc,Ddit3,Ddit4,Ddx5,Dusp1,Gapdh,Gata2,Hsp90aa1,Hspa4,Jun,Jund,Kpna1,Map2k1,Map2k2,Mcl1,Med1,Ncl,Poldip3,Ptprj,Pycard,Rala,Rb1cc1,Rcc1,Smyd2,Stmn1,Tfrc,Tgfbr3,Vegfa,Ywhah,Zfand5	NA	NA	NA	NA
Pathway Commons	Nucleosome assembly							4.3643e-25					NA	NA	NA	NA	NA	NA	Hist1h4c,Hist1h4d,Hist1h4h,Hist1h4i,Hist1h4k	NA	NA	NA	NA
Pathway Commons	Nucleotide-like (purinergic) receptors							5.72293e-16					NA	NA	NA	NA	NA	NA	P2ry12,P2ry13,P2ry14	NA	NA	NA	NA
Pathway Commons	P2Y receptors							5.72293e-16					NA	NA	NA	NA	NA	NA	P2ry12,P2ry13,P2ry14	NA	NA	NA	NA
Pathway Commons	Packaging Of Telomere Ends							3.47972e-26					NA	NA	NA	NA	NA	NA	Hist1h4c,Hist1h4d,Hist1h4h,Hist1h4i,Hist1h4k	NA	NA	NA	NA
Pathway Commons	PAR1-mediated thrombin signaling events							1.43919e-149					NA	NA	NA	NA	NA	NA	Aicda,Calm1,Calm2,Cat,Cited2,Cltc,Ddit3,Ddit4,Ddx5,Dusp1,Gapdh,Gata2,Hsp90aa1,Hspa4,Jun,Jund,Kpna1,Map2k1,Map2k2,Mcl1,Med1,Ncl,Poldip3,Ptprj,Pycard,Rala,Rb1cc1,Rcc1,Smyd2,Stmn1,Tfrc,Tgfbr3,Vegfa,Ywhah,Zfand5	NA	NA	NA	NA
Pathway Commons	PDGFR-beta signaling pathway							3.30354e-149					NA	NA	NA	NA	NA	NA	Aicda,Calm1,Calm2,Cat,Cited2,Cltc,Ddit3,Ddit4,Ddx5,Dusp1,Gapdh,Gata2,Hsp90aa1,Hspa4,Jun,Jund,Kpna1,Map2k1,Map2k2,Mcl1,Med1,Ncl,Poldip3,Ptprj,Pycard,Rala,Rb1cc1,Rcc1,Smyd2,Stmn1,Tfrc,Tgfbr3,Vegfa,Ywhah,Zfand5	NA	NA	NA	NA
Pathway Commons	PDGF receptor signaling network							1.45876e-149					NA	NA	NA	NA	NA	NA	Aicda,Calm1,Calm2,Cat,Cited2,Cltc,Ddit3,Ddit4,Ddx5,Dusp1,Gapdh,Gata2,Hsp90aa1,Hspa4,Jun,Jund,Kpna1,Map2k1,Map2k2,Mcl1,Med1,Ncl,Poldip3,Ptprj,Pycard,Rala,Rb1cc1,Rcc1,Smyd2,Stmn1,Tfrc,Tgfbr3,Vegfa,Ywhah,Zfand5	NA	NA	NA	NA
Pathway Commons	PKA activation							1.37378e-11					NA	NA	NA	NA	NA	NA	Calm1,Calm2	NA	NA	NA	NA
Pathway Commons	PKA-mediated phosphorylation of CREB							2.41822e-11					NA	NA	NA	NA	NA	NA	Calm1,Calm2	NA	NA	NA	NA
Pathway Commons	Plasma membrane estrogen receptor signaling							2.05732e-153					NA	NA	NA	NA	NA	NA	Aicda,Calm1,Calm2,Cat,Cited2,Cltc,Ddit3,Ddit4,Ddx5,Dusp1,Gapdh,Gata2,Hbegf,Hsp90aa1,Hspa4,Jun,Jund,Kpna1,Map2k1,Map2k2,Mcl1,Med1,Ncl,Poldip3,Ptprj,Pycard,Rala,Rb1cc1,Rcc1,Smyd2,Stmn1,Tfrc,Tgfbr3,Vegfa,Ywhah,Zfand5	NA	NA	NA	NA
Pathway Commons	Proteoglycan syndecan-mediated signaling events							5.03339e-149					NA	NA	NA	NA	NA	NA	Aicda,Calm1,Calm2,Cat,Cited2,Cltc,Ddit3,Ddit4,Ddx5,Dusp1,Gapdh,Gata2,Hsp90aa1,Hspa4,Jun,Jund,Kpna1,Map2k1,Map2k2,Mcl1,Med1,Ncl,Poldip3,Ptprj,Pycard,Rala,Rb1cc1,Rcc1,Smyd2,Stmn1,Tfrc,Tgfbr3,Vegfa,Ywhah,Zfand5	NA	NA	NA	NA
Pathway Commons	RAF phosphorylates MEK							2.41822e-11					NA	NA	NA	NA	NA	NA	Map2k1,Map2k2	NA	NA	NA	NA
Pathway Commons	Ras signaling in the CD4+ TCR pathway							8.55682e-20					NA	NA	NA	NA	NA	NA	Calm1,Calm2,Jun,Map2k1	NA	NA	NA	NA
Pathway Commons	RNA Polymerase I Chain Elongation							4.3643e-25					NA	NA	NA	NA	NA	NA	Hist1h4c,Hist1h4d,Hist1h4h,Hist1h4i,Hist1h4k	NA	NA	NA	NA
Pathway Commons	RNA Polymerase I Promoter Clearance							9.88515e-25					NA	NA	NA	NA	NA	NA	Hist1h4c,Hist1h4d,Hist1h4h,Hist1h4i,Hist1h4k	NA	NA	NA	NA
Pathway Commons	RNA Polymerase I Promoter Opening							1.50826e-26					NA	NA	NA	NA	NA	NA	Hist1h4c,Hist1h4d,Hist1h4h,Hist1h4i,Hist1h4k	NA	NA	NA	NA
Pathway Commons	RNA Polymerase I Transcription							1.26461e-24					NA	NA	NA	NA	NA	NA	Hist1h4c,Hist1h4d,Hist1h4h,Hist1h4i,Hist1h4k	NA	NA	NA	NA
Pathway Commons	S1P1 pathway							3.30354e-149					NA	NA	NA	NA	NA	NA	Aicda,Calm1,Calm2,Cat,Cited2,Cltc,Ddit3,Ddit4,Ddx5,Dusp1,Gapdh,Gata2,Hsp90aa1,Hspa4,Jun,Jund,Kpna1,Map2k1,Map2k2,Mcl1,Med1,Ncl,Poldip3,Ptprj,Pycard,Rala,Rb1cc1,Rcc1,Smyd2,Stmn1,Tfrc,Tgfbr3,Vegfa,Ywhah,Zfand5	NA	NA	NA	NA
Pathway Commons	Signaling events mediated by focal adhesion kinase							3.30354e-149					NA	NA	NA	NA	NA	NA	Aicda,Calm1,Calm2,Cat,Cited2,Cltc,Ddit3,Ddit4,Ddx5,Dusp1,Gapdh,Gata2,Hsp90aa1,Hspa4,Jun,Jund,Kpna1,Map2k1,Map2k2,Mcl1,Med1,Ncl,Poldip3,Ptprj,Pycard,Rala,Rb1cc1,Rcc1,Smyd2,Stmn1,Tfrc,Tgfbr3,Vegfa,Ywhah,Zfand5	NA	NA	NA	NA
Pathway Commons	Signaling events mediated by HDAC Class I							3.11097e-32					NA	NA	NA	NA	NA	NA	Gata2,Hist1h4c,Hist1h4d,Hist1h4h,Hist1h4i,Hist1h4k,Hsp90aa1	NA	NA	NA	NA
Pathway Commons	Signaling events mediated by HDAC Class III							7.62136e-25					NA	NA	NA	NA	NA	NA	Hist1h4c,Hist1h4d,Hist1h4h,Hist1h4i,Hist1h4k	NA	NA	NA	NA
Pathway Commons	Signaling events mediated by Hepatocyte Growth Factor Receptor (c-Met)							1.40327e-149					NA	NA	NA	NA	NA	NA	Aicda,Calm1,Calm2,Cat,Cited2,Cltc,Ddit3,Ddit4,Ddx5,Dusp1,Gapdh,Gata2,Hsp90aa1,Hspa4,Jun,Jund,Kpna1,Map2k1,Map2k2,Mcl1,Med1,Ncl,Poldip3,Ptprj,Pycard,Rala,Rb1cc1,Rcc1,Smyd2,Stmn1,Tfrc,Tgfbr3,Vegfa,Ywhah,Zfand5	NA	NA	NA	NA
Pathway Commons	Signaling events mediated by VEGFR1 and VEGFR2							1.39739e-149					NA	NA	NA	NA	NA	NA	Aicda,Calm1,Calm2,Cat,Cited2,Cltc,Ddit3,Ddit4,Ddx5,Dusp1,Gapdh,Gata2,Hsp90aa1,Hspa4,Jun,Jund,Kpna1,Map2k1,Map2k2,Mcl1,Med1,Ncl,Poldip3,Ptprj,Pycard,Rala,Rb1cc1,Rcc1,Smyd2,Stmn1,Tfrc,Tgfbr3,Vegfa,Ywhah,Zfand5	NA	NA	NA	NA
Pathway Commons	Sphingosine 1-phosphate (S1P) pathway							1.79011e-149					NA	NA	NA	NA	NA	NA	Aicda,Calm1,Calm2,Cat,Cited2,Cltc,Ddit3,Ddit4,Ddx5,Dusp1,Gapdh,Gata2,Hsp90aa1,Hspa4,Jun,Jund,Kpna1,Map2k1,Map2k2,Mcl1,Med1,Ncl,Poldip3,Ptprj,Pycard,Rala,Rb1cc1,Rcc1,Smyd2,Stmn1,Tfrc,Tgfbr3,Vegfa,Ywhah,Zfand5	NA	NA	NA	NA
Pathway Commons	Syndecan-1-mediated signaling events							1.48498e-149					NA	NA	NA	NA	NA	NA	Aicda,Calm1,Calm2,Cat,Cited2,Cltc,Ddit3,Ddit4,Ddx5,Dusp1,Gapdh,Gata2,Hsp90aa1,Hspa4,Jun,Jund,Kpna1,Map2k1,Map2k2,Mcl1,Med1,Ncl,Poldip3,Ptprj,Pycard,Rala,Rb1cc1,Rcc1,Smyd2,Stmn1,Tfrc,Tgfbr3,Vegfa,Ywhah,Zfand5	NA	NA	NA	NA
Pathway Commons	Telomere Maintenance							1.93774e-29					NA	NA	NA	NA	NA	NA	Hist1h4c,Hist1h4d,Hist1h4h,Hist1h4i,Hist1h4k,Nhp2	NA	NA	NA	NA
Pathway Commons	Tetrahydrobiopterin (BH4) synthesis, recycling, salvage and regulation							9.32052e-16					NA	NA	NA	NA	NA	NA	Calm1,Calm2,Hsp90aa1	NA	NA	NA	NA
Pathway Commons	Thrombin/protease-activated receptor (PAR) pathway							1.43951e-149					NA	NA	NA	NA	NA	NA	Aicda,Calm1,Calm2,Cat,Cited2,Cltc,Ddit3,Ddit4,Ddx5,Dusp1,Gapdh,Gata2,Hsp90aa1,Hspa4,Jun,Jund,Kpna1,Map2k1,Map2k2,Mcl1,Med1,Ncl,Poldip3,Ptprj,Pycard,Rala,Rb1cc1,Rcc1,Smyd2,Stmn1,Tfrc,Tgfbr3,Vegfa,Ywhah,Zfand5	NA	NA	NA	NA
Pathway Commons	TRAIL signaling pathway							2.41677e-149					NA	NA	NA	NA	NA	NA	Aicda,Calm1,Calm2,Cat,Cited2,Cltc,Ddit3,Ddit4,Ddx5,Dusp1,Gapdh,Gata2,Hsp90aa1,Hspa4,Jun,Jund,Kpna1,Map2k1,Map2k2,Mcl1,Med1,Ncl,Poldip3,Ptprj,Pycard,Rala,Rb1cc1,Rcc1,Smyd2,Stmn1,Tfrc,Tgfbr3,Vegfa,Ywhah,Zfand5	NA	NA	NA	NA
Pathway Commons	Urokinase-type plasminogen activator (uPA) and uPAR-mediated signaling							3.30354e-149					NA	NA	NA	NA	NA	NA	Aicda,Calm1,Calm2,Cat,Cited2,Cltc,Ddit3,Ddit4,Ddx5,Dusp1,Gapdh,Gata2,Hsp90aa1,Hspa4,Jun,Jund,Kpna1,Map2k1,Map2k2,Mcl1,Med1,Ncl,Poldip3,Ptprj,Pycard,Rala,Rb1cc1,Rcc1,Smyd2,Stmn1,Tfrc,Tgfbr3,Vegfa,Ywhah,Zfand5	NA	NA	NA	NA
Pathway Commons	Validated targets of C-MYC transcriptional activation							4.28397e-28					NA	NA	NA	NA	NA	NA	Gapdh,Hsp90aa1,Hspa4,Ncl,Rcc1,Tfrc	NA	NA	NA	NA
Pathway Commons	VEGF and VEGFR signaling network							1.53298e-149					NA	NA	NA	NA	NA	NA	Aicda,Calm1,Calm2,Cat,Cited2,Cltc,Ddit3,Ddit4,Ddx5,Dusp1,Gapdh,Gata2,Hsp90aa1,Hspa4,Jun,Jund,Kpna1,Map2k1,Map2k2,Mcl1,Med1,Ncl,Poldip3,Ptprj,Pycard,Rala,Rb1cc1,Rcc1,Smyd2,Stmn1,Tfrc,Tgfbr3,Vegfa,Ywhah,Zfand5	NA	NA	NA	NA
Pathway Commons	VEGFR1 specific signals							5.05766e-20					NA	NA	NA	NA	NA	NA	Calm1,Calm2,Hsp90aa1,Vegfa	NA	NA	NA	NA
GO Biological Process	negative regulation of catalytic activity								6.58428e-107				NA	NA	NA	NA	NA	NA	NA	Adora2a,Cnr1,Gnaq,Inpp5k,Ints1,Itih2,Itih5,Pebp1,Serpina12,Serpina1c,Serpina1e,Serpina3a,Serpina3b,Serpina3c,Serpina3g,Serpina3k,Serpina3n,Serpina5,Serpina9,Serpinb10-ps,Serpinb2,Spink3,Spink5	NA	NA	NA
GO Biological Process	negative regulation of endopeptidase activity								1.45715e-58				NA	NA	NA	NA	NA	NA	NA	Serpina12,Serpina1c,Serpina1e,Serpina3a,Serpina3b,Serpina3c,Serpina3g,Serpina3k,Serpina5,Serpina9,Serpinb2	NA	NA	NA
GO Biological Process	negative regulation of hydrolase activity								9.9137e-98				NA	NA	NA	NA	NA	NA	NA	Adora2a,Ints1,Itih2,Itih5,Pebp1,Serpina12,Serpina1c,Serpina1e,Serpina3a,Serpina3b,Serpina3c,Serpina3g,Serpina3k,Serpina3n,Serpina5,Serpina9,Serpinb10-ps,Serpinb2,Spink3,Spink5	NA	NA	NA
GO Biological Process	negative regulation of molecular function								2.23277e-123				NA	NA	NA	NA	NA	NA	NA	Adora2a,Atp8b2,Cnr1,Gnaq,Inpp5k,Ints1,Itih2,Itih5,Mapk3,Nfkbia,Pebp1,Serpina12,Serpina1c,Serpina1e,Serpina3a,Serpina3b,Serpina3c,Serpina3g,Serpina3k,Serpina3n,Serpina5,Serpina9,Serpinb10-ps,Serpinb2,Spink3,Spink5,Trib2	NA	NA	NA
GO Biological Process	negative regulation of peptidase activity								3.44776e-99				NA	NA	NA	NA	NA	NA	NA	Adora2a,Ints1,Itih2,Itih5,Pebp1,Serpina12,Serpina1c,Serpina1e,Serpina3a,Serpina3b,Serpina3c,Serpina3g,Serpina3k,Serpina3n,Serpina5,Serpina9,Serpinb10-ps,Serpinb2,Spink3,Spink5	NA	NA	NA
GO Biological Process	regulation of endopeptidase activity								2.48786e-78				NA	NA	NA	NA	NA	NA	NA	Adora2a,Bok,C9,Ints1,Serpina12,Serpina1c,Serpina1e,Serpina3a,Serpina3b,Serpina3c,Serpina3g,Serpina3k,Serpina5,Serpina9,Serpinb2,Tpd52l1	NA	NA	NA
GO Biological Process	regulation of peptidase activity								6.89535e-111				NA	NA	NA	NA	NA	NA	NA	Adora2a,Bok,C9,Ints1,Itih2,Itih5,Pebp1,Serpina12,Serpina1c,Serpina1e,Serpina3a,Serpina3b,Serpina3c,Serpina3g,Serpina3k,Serpina3n,Serpina5,Serpina9,Serpinb10-ps,Serpinb2,Spink3,Spink5,Tpd52l1	NA	NA	NA
GO Biological Process	regulation of proteolysis								2.1642e-70				NA	NA	NA	NA	NA	NA	NA	Csnk1e,Serpina12,Serpina1c,Serpina1e,Serpina3a,Serpina3b,Serpina3c,Serpina3g,Serpina3k,Serpina5,Serpina9,Serpinb2,Spink5,Trib2	NA	NA	NA
GO Molecular Function	endopeptidase inhibitor activity								1.91136e-105				NA	NA	NA	NA	NA	NA	NA	Ctla2b,Itih2,Itih5,Pebp1,Serpina12,Serpina1c,Serpina1e,Serpina3a,Serpina3b,Serpina3c,Serpina3g,Serpina3h,Serpina3i,Serpina3j,Serpina3k,Serpina3n,Serpina5,Serpina9,Serpinb10-ps,Serpinb2,Spink3	NA	NA	NA
GO Molecular Function	endopeptidase regulator activity								3.06024e-105				NA	NA	NA	NA	NA	NA	NA	Ctla2b,Itih2,Itih5,Pebp1,Serpina12,Serpina1c,Serpina1e,Serpina3a,Serpina3b,Serpina3c,Serpina3g,Serpina3h,Serpina3i,Serpina3j,Serpina3k,Serpina3n,Serpina5,Serpina9,Serpinb10-ps,Serpinb2,Spink3	NA	NA	NA
GO Molecular Function	enzyme inhibitor activity								8.08245e-116				NA	NA	NA	NA	NA	NA	NA	Cdkn2b,Ctla2b,Itih2,Itih5,Pebp1,Serpina12,Serpina1c,Serpina1e,Serpina3a,Serpina3b,Serpina3c,Serpina3g,Serpina3h,Serpina3i,Serpina3j,Serpina3k,Serpina3n,Serpina5,Serpina9,Serpinb10-ps,Serpinb2,Spink3,Spink5,Trib2	NA	NA	NA
GO Molecular Function	enzyme regulator activity								9.64869e-142				NA	NA	NA	NA	NA	NA	NA	Arhgef9,Bcr,Cdkn2b,Ctla2b,Dock8,Gnaq,Itih2,Itih5,Ltc4s,Pebp1,Ralgapa1,Sec14l2,Serpina12,Serpina1c,Serpina1e,Serpina3a,Serpina3b,Serpina3c,Serpina3g,Serpina3h,Serpina3i,Serpina3j,Serpina3k,Serpina3n,Serpina5,Serpina9,Serpinb10-ps,Serpinb2,Spink3,Spink5,Tpd52l1,Trib2	NA	NA	NA
GO Molecular Function	odorant binding								3.21411e-25				NA	NA	NA	NA	NA	NA	NA	Mup1,Mup4,Mup6,Mup7,Mup8	NA	NA	NA
GO Molecular Function	peptidase inhibitor activity								9.67428e-110				NA	NA	NA	NA	NA	NA	NA	Ctla2b,Itih2,Itih5,Pebp1,Serpina12,Serpina1c,Serpina1e,Serpina3a,Serpina3b,Serpina3c,Serpina3g,Serpina3h,Serpina3i,Serpina3j,Serpina3k,Serpina3n,Serpina5,Serpina9,Serpinb10-ps,Serpinb2,Spink3,Spink5	NA	NA	NA
GO Molecular Function	peptidase regulator activity								5.66522e-114				NA	NA	NA	NA	NA	NA	NA	Ctla2b,Itih2,Itih5,Pebp1,Serpina12,Serpina1c,Serpina1e,Serpina3a,Serpina3b,Serpina3c,Serpina3g,Serpina3h,Serpina3i,Serpina3j,Serpina3k,Serpina3n,Serpina5,Serpina9,Serpinb10-ps,Serpinb2,Spink3,Spink5,Tpd52l1	NA	NA	NA
GO Molecular Function	pheromone binding								3.19474e-26				NA	NA	NA	NA	NA	NA	NA	Mup1,Mup4,Mup6,Mup7,Mup8	NA	NA	NA
GO Molecular Function	protein tyrosine kinase activity								4.15432e-50				NA	NA	NA	NA	NA	NA	NA	2810408M09Rik,D8Ertd82e,Dyrk1a,Flt1,Insrr,Map3k9,Met,Mup4,Mup7,Mup8,Ntrk1	NA	NA	NA
GO Molecular Function	serine-type endopeptidase inhibitor activity								3.2078e-104				NA	NA	NA	NA	NA	NA	NA	Itih2,Itih5,Pebp1,Serpina12,Serpina1c,Serpina1e,Serpina3a,Serpina3b,Serpina3c,Serpina3g,Serpina3h,Serpina3i,Serpina3j,Serpina3k,Serpina3n,Serpina5,Serpina9,Serpinb10-ps,Serpinb2,Spink3	NA	NA	NA
GO Molecular Function	sugar binding								6.54134e-68				NA	NA	NA	NA	NA	NA	NA	Clec1a,Clec1b,Clec7a,Clec9a,Galnt12,Galnt2,Gm156,Klra17,Klra5,Klrc1,Klrc3,Klre1,Klri1,Klri2,Olr1	NA	NA	NA
BioCyc Pathway	heme biosynthesis from uroporphyrinogen-III I									3.6185e-22			NA	NA	NA	NA	NA	NA	NA	NA	Cpox,Fech,Ppox,Urod	NA	NA
BioCyc Pathway	heme biosynthesis II									7.07244e-26			NA	NA	NA	NA	NA	NA	NA	NA	Alas2,Cpox,Fech,Ppox,Urod	NA	NA
GO Biological Process	cellular nitrogen compound biosynthetic process									3.11509e-93			NA	NA	NA	NA	NA	NA	NA	NA	Abcb6,Alas2,Ampd2,Ampd3,Asns,Atp2b1,Cpox,Ctps2,Fech,Gclm,Naprt1,Nme5,Padi1,Padi2,Ppox,Pycr2,Slc27a1,Spna1,Spnb1,Tmem14c,Urod	NA	NA
GO Biological Process	cofactor biosynthetic process									1.3724e-61			NA	NA	NA	NA	NA	NA	NA	NA	Abcb6,Acss1,Alas2,Cpox,Fech,Gcdh,Naprt1,Pnpo,Ppox,Spna1,Spnb1,Tmem14c,Urod	NA	NA
GO Biological Process	cofactor metabolic process									3.76348e-77			NA	NA	NA	NA	NA	NA	NA	NA	Abcb6,Acot6,Acss1,Alas2,Blvrb,Cpox,Ehhadh,Fech,Gcdh,Naprt1,Pgls,Pnpo,Ppox,Spna1,Spnb1,Tmem14c,Urod	NA	NA
GO Biological Process	erythrocyte differentiation									2.08222e-38			NA	NA	NA	NA	NA	NA	NA	NA	Alas2,Dnase2a,Epb4.2,Fech,Hba-x,Klf1,Ldb1,Trim10	NA	NA
GO Biological Process	erythrocyte homeostasis									4.05342e-38			NA	NA	NA	NA	NA	NA	NA	NA	Alas2,Dnase2a,Epb4.2,Fech,Hba-x,Klf1,Ldb1,Trim10	NA	NA
GO Biological Process	gas transport									1.36369e-25			NA	NA	NA	NA	NA	NA	NA	NA	Hba-a2,Hba-x,Hbb-y,Hbq1a,Hbq1b	NA	NA
GO Biological Process	heme biosynthetic process									4.00513e-31			NA	NA	NA	NA	NA	NA	NA	NA	Alas2,Cpox,Fech,Ppox,Tmem14c,Urod	NA	NA
GO Biological Process	heme metabolic process									9.60045e-36			NA	NA	NA	NA	NA	NA	NA	NA	Alas2,Blvrb,Cpox,Fech,Ppox,Tmem14c,Urod	NA	NA
GO Biological Process	heterocycle biosynthetic process									2.30695e-72			NA	NA	NA	NA	NA	NA	NA	NA	Abcb6,Alas2,Ampd2,Ampd3,Atp2b1,Cpox,Ctps2,Fech,Naprt1,Nme5,Ppox,Pycr2,Spna1,Spnb1,Tmem14c,Urod	NA	NA
GO Biological Process	oxidation-reduction process									5.02618e-159			NA	NA	NA	NA	NA	NA	NA	NA	5730469M10Rik,Akr1b10,Akr1b3,Akr1b7,Akr1b8,Blvrb,Cpox,Cyp2c29,Cyp2c38,Cyp2c39,Cyp2c55,Cyp2c65,Cyp2c66,Ehhadh,Fa2h,Frrs1,Gcdh,Gfod1,Ivd,Jhdm1d,Kdm3b,Kl,Lao1,Lepre1,Ndufs5,P4ha1,Pgls,Plod3,Pnpo,Ppox,Prdx2,Prdx6,Prkaa1,Pycr2,Scd4,Txn2,Txnrd2	NA	NA
GO Biological Process	oxygen transport									2.72282e-26			NA	NA	NA	NA	NA	NA	NA	NA	Hba-a2,Hba-x,Hbb-y,Hbq1a,Hbq1b	NA	NA
GO Biological Process	pigment metabolic process									6.69924e-34			NA	NA	NA	NA	NA	NA	NA	NA	Alas2,Blvrb,Cpox,Fech,Ppox,Tmem14c,Urod	NA	NA
GO Biological Process	porphyrin-containing compound biosynthetic process									5.69709e-47			NA	NA	NA	NA	NA	NA	NA	NA	Abcb6,Alas2,Cpox,Fech,Ppox,Spna1,Spnb1,Tmem14c,Urod	NA	NA
GO Biological Process	porphyrin-containing compound metabolic process									5.5567e-51			NA	NA	NA	NA	NA	NA	NA	NA	Abcb6,Alas2,Blvrb,Cpox,Fech,Ppox,Spna1,Spnb1,Tmem14c,Urod	NA	NA
GO Biological Process	tetrapyrrole metabolic process									7.33178e-51			NA	NA	NA	NA	NA	NA	NA	NA	Abcb6,Alas2,Blvrb,Cpox,Fech,Ppox,Spna1,Spnb1,Tmem14c,Urod	NA	NA
GO Molecular Function	catalytic activity									0			NA	NA	NA	NA	NA	NA	NA	NA	5730469M10Rik,Abcb6,Abcf3,Abcg4,Acmsd,Acot6,Acp5,Acss1,Adamtsl5,Ak7,Akr1b10,Akr1b3,Akr1b7,Akr1b8,Alas2,Alg3,Alpk1,Ampd2,Ampd3,Apeh,Arl2,Asns,Asprv1,Atp2b1,Aurka,B4galt1,Bace1,Blvrb,Bphl,Camk2n2,Car3,Carm1,Cdc6,Cdkl1,Cel,Cgn,Cnot4,Comt,Cpox,Ctps2,Cyp2c29,Cyp2c38,Cyp2c39,Cyp2c55,Cyp2c65,Cyp2c66,Dagla,Ddhd1,Dnase2a,Ece2,Ehhadh,Endod1,Entpd4,Epb4.2,Eral1,Fa2h,Fech,Fen1,Frrs1,Fuk,Galnt10,Gcdh,Gclm,Gcs…	NA	NA
GO Molecular Function	heme binding									5.75589e-64			NA	NA	NA	NA	NA	NA	NA	NA	Abcb6,Cyp2c29,Cyp2c38,Cyp2c39,Cyp2c55,Cyp2c65,Cyp2c66,Fa2h,Fech,Hba-a2,Hba-x,Hbb-y,Hbq1a,Hbq1b	NA	NA
GO Molecular Function	iron ion binding									2.59666e-95			NA	NA	NA	NA	NA	NA	NA	NA	Abcb6,Acp5,Cyp2c29,Cyp2c38,Cyp2c39,Cyp2c55,Cyp2c65,Cyp2c66,Fa2h,Fech,Hba-a2,Hba-x,Hbb-y,Hbq1a,Hbq1b,Jhdm1d,Lepre1,P4ha1,Plod3,Scd4,Urod	NA	NA
GO Molecular Function	oxygen transporter activity									4.61865e-26			NA	NA	NA	NA	NA	NA	NA	NA	Hba-a2,Hba-x,Hbb-y,Hbq1a,Hbq1b	NA	NA
GO Molecular Function	tetrapyrrole binding									1.02267e-63			NA	NA	NA	NA	NA	NA	NA	NA	Abcb6,Cyp2c29,Cyp2c38,Cyp2c39,Cyp2c55,Cyp2c65,Cyp2c66,Fa2h,Fech,Hba-a2,Hba-x,Hbb-y,Hbq1a,Hbq1b	NA	NA
MGI Expression: Detected	TS23 liver									0		0	NA	NA	NA	NA	NA	NA	NA	NA	1110038D17Rik,5730469M10Rik,Abcb6,Abcg4,Acp5,Add2,Ampd3,Apeh,Asns,Blvrb,Ccnf,Cldn13,Comt,Daam2,Ddhd1,Ehhadh,Epb4.2,Ermap,Fam46c,Fech,Foxo3,Frrs1,Gclm,Gstm1,Hbq1a,Hbq1b,Hells,Herc1,Ide,Kcnn4,Kdr,Minpp1,Mst1,Mybl2,Nanp,Ninl,Nprl3,Nudt19,Pnpo,Prdx6,Ptdss2,Ranbp10,Rnf123,Serpina10,Serpina1b,Serpina1d,Serpina6,Slc16a10,Slc22a4,Slc23a3,Slc40a1,Slc4a1,Slc6a9,Snx22,Spna1,Spnb1,Stom,Tcp11l2,Tifa,Tmem150a,…	NA	4930430F08Rik,Acaa2,Acot1,Acot4,Acp1,Acsl4,Actc1,Adcy9,Adrb2,Aff4,Agpat3,Alad,Aldh8a1,Aldob,Alox5ap,Ambp,Amfr,Ankrd43,Ap2a1,Apoa1,Apoe,Apol8,Aqp1,Arhgap24,Arrb1,Art4,Atad5,B4galt6,Bcap29,Bcl2l1,Bcs1l,Bdh1,Beta-s,Bid,Bub1b,Butr1,C8g,Cadm3,Camsap1l1,Cd19,Cdr2,Cenpo,Ces2b,Ces2e,Ces2g,Chek2,Clint1,Cmas,Cmpk2,Creg1,Crlf3,Csnk2a1,Csnk2a2,Ctgf,Ctse,Cxcl5,Daglb,Dennd2c,Dennd4a,Dnaja4,Dph2,E2f4,Ehbp1l1,Ei…
MGI Expression: Detected	TS23 liver and biliary system									0		0	NA	NA	NA	NA	NA	NA	NA	NA	1110038D17Rik,5730469M10Rik,Abcb6,Abcg4,Acp5,Add2,Ampd3,Apeh,Asns,Blvrb,Ccnf,Cldn13,Comt,Daam2,Ddhd1,Ehhadh,Epb4.2,Ermap,Fam46c,Fech,Foxo3,Frrs1,Gclm,Gstm1,Hbq1a,Hbq1b,Hells,Herc1,Ide,Kcnn4,Kdr,Minpp1,Mst1,Mybl2,Nanp,Ninl,Nprl3,Nudt19,Pnpo,Prdx6,Ptdss2,Ranbp10,Rnf123,Serpina10,Serpina1b,Serpina1d,Serpina6,Slc16a10,Slc22a4,Slc23a3,Slc40a1,Slc4a1,Slc6a9,Snx22,Spna1,Spnb1,Stom,Tcp11l2,Tifa,Tmem150a,…	NA	4930430F08Rik,Acaa2,Acot1,Acot4,Acp1,Acsl4,Actc1,Adcy9,Adrb2,Aff4,Agpat3,Alad,Aldh8a1,Aldob,Alox5ap,Ambp,Amfr,Ankrd43,Ap2a1,Apoa1,Apoe,Apol8,Aqp1,Arhgap24,Arrb1,Art4,Atad5,B4galt6,Bcap29,Bcl2l1,Bcs1l,Bdh1,Beta-s,Bid,Bub1b,Butr1,C8g,Cadm3,Camsap1l1,Cd19,Cdr2,Cenpo,Ces2b,Ces2e,Ces2g,Chek2,Clint1,Cmas,Cmpk2,Creg1,Crlf3,Csnk2a1,Csnk2a2,Ctgf,Ctse,Cxcl5,Daglb,Dennd2c,Dennd4a,Dnaja4,Dph2,E2f4,Ehbp1l1,Ei…
MGI Expression: Detected	TS23 liver; lobe									2.51378e-189		0	NA	NA	NA	NA	NA	NA	NA	NA	1110038D17Rik,Abcb6,Abcg4,Acp5,Add2,Ampd3,Apeh,Ccnf,Ddhd1,Epb4.2,Fam46c,Frrs1,Gclm,Gstm1,Hbq1a,Hbq1b,Kcnn4,Mybl2,Nanp,Ninl,Nudt19,Pnpo,Ptdss2,Ranbp10,Serpina10,Serpina1b,Serpina1d,Slc16a10,Slc22a4,Slc6a9,Spna1,Stom,Tcp11l2,Tmem150a,Tnfrsf14,Tnnc1,Trim2,Trim25,Tspan33,Txnrd2,Ubac1	NA	4930430F08Rik,Acot1,Acot4,Acp1,Adrb2,Aldh8a1,Aldob,Alox5ap,Ambp,Amfr,Ankrd43,Apoe,Aqp1,Arhgap24,Arrb1,Art4,Bcap29,Bdh1,Beta-s,Bub1b,Butr1,Cdr2,Cenpo,Ces2b,Ces2e,Ces2g,Cmas,Cxcl5,Dennd4a,Dph2,E2f4,Ehbp1l1,Eif2s1,Elovl2,Evi5,F12,F13b,F2,Fabp5,Fam180a,Gpd1,Gtf2e2,Gulo,Gypc,Hbb-b1,Hgfac,Hip1r,Hmbs,Hp,Hpd,Hprt,Hpx,Idi1,Ifi30,Ifnar2,Insig1,Ipo13,Lcn2,Lgals3bp,Lgals9,Ltf,Mllt3,Mrpl15,Mrps30,Mt1,Mtpap,Os…
MGI Expression: Detected	TS23 liver; lobe; left									1.71904e-65			NA	NA	NA	NA	NA	NA	NA	NA	Acp5,Add2,Epb4.2,Frrs1,Gclm,Ninl,Nudt19,Serpina1b,Serpina1d,Slc6a9,Spna1,Stom,Txnrd2,Ubac1	NA	NA
MGI Expression: Detected	TS23 liver; lobe; right									1.55362e-65			NA	NA	NA	NA	NA	NA	NA	NA	Acp5,Add2,Epb4.2,Frrs1,Gclm,Ninl,Nudt19,Serpina1b,Serpina1d,Slc6a9,Spna1,Stom,Txnrd2,Ubac1	NA	NA
Mouse Phenotype	abnormal erythrocyte cell number									8.188e-78			NA	NA	NA	NA	NA	NA	NA	NA	B4galt1,Cd59b,Dnase2a,Epb4.2,Fech,Foxo3,Klf1,Mdm2,Pim2,Prkaa1,Sipa1,Slc40a1,Slc4a1,Spna1,Spnb1,Tmprss6,Tspan33	NA	NA
Mouse Phenotype	abnormal erythrocyte morphology									9.9851e-138			NA	NA	NA	NA	NA	NA	NA	NA	Add2,Alas2,B4galt1,Bdkrb2,Cd59b,Cul4a,Dnase2a,Epb4.2,Fech,Foxo3,Gypa,Hba-a2,Hba-x,Kcnn4,Klf1,Mdm2,Nprl3,Pcid2,Pim2,Prdx2,Prkaa1,Sipa1,Slc40a1,Slc4a1,Spna1,Spnb1,Tmod1,Tmprss6,Tspan33,Txnrd2,Wdr1	NA	NA
Mouse Phenotype	abnormal erythrocyte osmotic lysis									9.19805e-41			NA	NA	NA	NA	NA	NA	NA	NA	Add2,Fech,Kcnn4,Klf1,Prkaa1,Slc4a1,Spna1,Spnb1	NA	NA
Mouse Phenotype	abnormal erythrocyte physiology									6.4016e-45			NA	NA	NA	NA	NA	NA	NA	NA	Add2,Cd59b,Fech,Kcnn4,Klf1,Prkaa1,Slc4a1,Spna1,Spnb1	NA	NA
Mouse Phenotype	abnormal erythropoiesis									3.27938e-146			NA	NA	NA	NA	NA	NA	NA	NA	Add2,Alas2,B4galt1,Bdkrb2,Cd59b,Cul4a,Dnase2a,Epb4.2,Fech,Foxo3,Gypa,Hba-a2,Hba-x,Icam4,Kcnn4,Klf1,Mdm2,Nprl3,Pcid2,Pim2,Prdx2,Prkaa1,Sac3d1,Sipa1,Slc40a1,Slc4a1,Spna1,Spnb1,Tmod1,Tmprss6,Tspan33,Txnrd2,Wdr1	NA	NA
Mouse Phenotype	abnormal hematocrit									1.44847e-83			NA	NA	NA	NA	NA	NA	NA	NA	Add2,B4galt1,Bdkrb2,Cd59b,Cul4a,Epb4.2,Fech,Kcnn4,Klf1,Pcid2,Prdx2,Prkaa1,Slc40a1,Slc4a1,Spna1,Spnb1,Tmprss6,Tspan33	NA	NA
Mouse Phenotype	abnormal hemoglobin									4.05092e-89			NA	NA	NA	NA	NA	NA	NA	NA	Add2,B4galt1,Cd59b,Epb4.2,Fech,Foxo3,Hba-a2,Hba-x,Kcnn4,Klf1,Mdm2,Nprl3,Prdx2,Prkaa1,Slc40a1,Slc4a1,Spna1,Spnb1,Tmprss6	NA	NA
Mouse Phenotype	abnormal hemoglobin content									7.23854e-75			NA	NA	NA	NA	NA	NA	NA	NA	Add2,B4galt1,Cd59b,Epb4.2,Fech,Hba-a2,Kcnn4,Klf1,Mdm2,Nprl3,Prdx2,Slc40a1,Slc4a1,Spna1,Spnb1,Tmprss6	NA	NA
Mouse Phenotype	abnormal ion homeostasis									3.21915e-72			NA	NA	NA	NA	NA	NA	NA	NA	Add2,Akr1b3,Alas2,Epb4.2,Gfap,Kcnn4,Kl,Klf1,Prdx2,S100g,Slc40a1,Slc4a1,Spna1,Spnb1,Tmprss6,Urod	NA	NA
Mouse Phenotype	abnormal iron homeostasis									1.65627e-58			NA	NA	NA	NA	NA	NA	NA	NA	Add2,Alas2,Epb4.2,Gfap,Kcnn4,Klf1,Prdx2,Slc40a1,Spna1,Spnb1,Tmprss6,Urod	NA	NA
Mouse Phenotype	abnormal iron level									8.22357e-59			NA	NA	NA	NA	NA	NA	NA	NA	Add2,Alas2,Epb4.2,Gfap,Kcnn4,Klf1,Prdx2,Slc40a1,Spna1,Spnb1,Tmprss6,Urod	NA	NA
Mouse Phenotype	abnormal liver iron level									1.28844e-29			NA	NA	NA	NA	NA	NA	NA	NA	Add2,Klf1,Slc40a1,Spna1,Tmprss6,Urod	NA	NA
Mouse Phenotype	abnormal mean corpuscular hemoglobin									7.91788e-45			NA	NA	NA	NA	NA	NA	NA	NA	Add2,Foxo3,Hba-a2,Hba-x,Klf1,Nprl3,Prkaa1,Slc40a1,Slc4a1	NA	NA
Mouse Phenotype	abnormal mean corpuscular volume									5.16748e-58			NA	NA	NA	NA	NA	NA	NA	NA	Add2,Epb4.2,Foxo3,Hba-a2,Hba-x,Kcnn4,Nprl3,Pim2,Slc40a1,Slc4a1,Spna1,Tmprss6	NA	NA
Mouse Phenotype	abnormal mineral homeostasis									4.37112e-68			NA	NA	NA	NA	NA	NA	NA	NA	Add2,Akr1b3,Alas2,Epb4.2,Gfap,Kcnn4,Kl,Klf1,Prdx2,Slc40a1,Slc4a1,Spna1,Spnb1,Tmprss6,Urod	NA	NA
Mouse Phenotype	abnormal mineral level									1.79772e-68			NA	NA	NA	NA	NA	NA	NA	NA	Add2,Akr1b3,Alas2,Epb4.2,Gfap,Kcnn4,Kl,Klf1,Prdx2,Slc40a1,Slc4a1,Spna1,Spnb1,Tmprss6,Urod	NA	NA
Mouse Phenotype	abnormal proerythroblast morphology									1.60635e-33			NA	NA	NA	NA	NA	NA	NA	NA	B4galt1,Cd59b,Klf1,Pim2,Prdx2,Slc4a1,Spna1	NA	NA
Mouse Phenotype	abnormal reticulocyte morphology									1.91596e-62			NA	NA	NA	NA	NA	NA	NA	NA	Add2,Cd59b,Epb4.2,Fech,Foxo3,Hba-a2,Prdx2,Prkaa1,Slc40a1,Slc4a1,Spna1,Spnb1,Tspan33	NA	NA
Mouse Phenotype	abnormal spleen iron level									1.17504e-35			NA	NA	NA	NA	NA	NA	NA	NA	Add2,Epb4.2,Kcnn4,Klf1,Slc40a1,Spna1,Tmprss6	NA	NA
Mouse Phenotype	abnormal spleen weight									2.67452e-54			NA	NA	NA	NA	NA	NA	NA	NA	Add2,Cul4a,Epb4.2,Fech,Kcnn4,Klf1,Mdm2,Pcid2,Prdx2,Prkaa1,Spna1,Tmprss6	NA	NA
Mouse Phenotype	anemia									1.52763e-108			NA	NA	NA	NA	NA	NA	NA	NA	Add2,Alas2,Cd59b,Dnase2a,Epb4.2,Fech,Foxo3,Hba-a2,Hba-x,Klf1,Mdm2,Nprl3,Prdx2,Prkaa1,Sipa1,Slc40a1,Slc4a1,Spna1,Spnb1,Tmod1,Tmprss6,Tspan33,Txnrd2,Wdr1	NA	NA
Mouse Phenotype	anisocytosis									2.04086e-39			NA	NA	NA	NA	NA	NA	NA	NA	Fech,Hba-a2,Hba-x,Klf1,Nprl3,Slc40a1,Spna1,Spnb1	NA	NA
Mouse Phenotype	anisopoikilocytosis									8.76696e-26			NA	NA	NA	NA	NA	NA	NA	NA	Add2,Cd59b,Spna1,Spnb1,Tmprss6	NA	NA
Mouse Phenotype	decreased erythrocyte cell number									1.48757e-69			NA	NA	NA	NA	NA	NA	NA	NA	B4galt1,Cd59b,Dnase2a,Epb4.2,Fech,Foxo3,Klf1,Mdm2,Prkaa1,Sipa1,Slc4a1,Spna1,Spnb1,Tmprss6,Tspan33	NA	NA
Mouse Phenotype	decreased hematocrit									6.74401e-80			NA	NA	NA	NA	NA	NA	NA	NA	Add2,B4galt1,Bdkrb2,Cd59b,Cul4a,Epb4.2,Fech,Klf1,Pcid2,Prdx2,Prkaa1,Slc40a1,Slc4a1,Spna1,Spnb1,Tmprss6,Tspan33	NA	NA
Mouse Phenotype	decreased hemoglobin content									1.89112e-71			NA	NA	NA	NA	NA	NA	NA	NA	Add2,B4galt1,Cd59b,Epb4.2,Fech,Hba-a2,Klf1,Mdm2,Nprl3,Prdx2,Slc40a1,Slc4a1,Spna1,Spnb1,Tmprss6	NA	NA
Mouse Phenotype	decreased mean corpuscular hemoglobin									6.02876e-30			NA	NA	NA	NA	NA	NA	NA	NA	Add2,Hba-a2,Klf1,Nprl3,Prkaa1,Slc40a1	NA	NA
Mouse Phenotype	decreased mean corpuscular volume									1.44839e-44			NA	NA	NA	NA	NA	NA	NA	NA	Add2,Epb4.2,Hba-a2,Nprl3,Pim2,Slc40a1,Slc4a1,Spna1,Tmprss6	NA	NA
Mouse Phenotype	hemolysis									5.23775e-46			NA	NA	NA	NA	NA	NA	NA	NA	Add2,Cd59b,Fech,Kcnn4,Klf1,Prkaa1,Slc4a1,Spna1,Spnb1	NA	NA
Mouse Phenotype	hemolytic anemia									4.0485e-40			NA	NA	NA	NA	NA	NA	NA	NA	Cd59b,Foxo3,Hba-a2,Prdx2,Prkaa1,Slc4a1,Spna1,Spnb1	NA	NA
Mouse Phenotype	increased liver iron level									3.95816e-30			NA	NA	NA	NA	NA	NA	NA	NA	Add2,Klf1,Slc40a1,Spna1,Tmprss6,Urod	NA	NA
Mouse Phenotype	increased red blood cell distribution width									4.61575e-49			NA	NA	NA	NA	NA	NA	NA	NA	Fech,Hba-a2,Hba-x,Klf1,Nprl3,Prkaa1,Slc40a1,Spna1,Spnb1,Tmprss6	NA	NA
Mouse Phenotype	increased spleen iron level									3.35908e-26			NA	NA	NA	NA	NA	NA	NA	NA	Add2,Epb4.2,Kcnn4,Klf1,Slc40a1	NA	NA
Mouse Phenotype	poikilocytosis									1.61924e-56			NA	NA	NA	NA	NA	NA	NA	NA	Add2,Cd59b,Hba-a2,Hba-x,Klf1,Nprl3,Prdx2,Slc40a1,Slc4a1,Spna1,Spnb1	NA	NA
Mouse Phenotype	polychromatophilia									3.16456e-30			NA	NA	NA	NA	NA	NA	NA	NA	Fech,Hba-a2,Hba-x,Klf1,Slc4a1,Spna1	NA	NA
Mouse Phenotype	reticulocytosis									9.0525e-64			NA	NA	NA	NA	NA	NA	NA	NA	Add2,Cd59b,Epb4.2,Fech,Foxo3,Hba-a2,Prdx2,Prkaa1,Slc40a1,Slc4a1,Spna1,Spnb1,Tspan33	NA	NA
Mouse Phenotype	spherocytosis									8.01419e-32			NA	NA	NA	NA	NA	NA	NA	NA	Add2,Epb4.2,Prdx2,Slc4a1,Spna1,Spnb1	NA	NA
MSigDB Pathway	Hemoglobin s Chaperone									6.56916e-26			NA	NA	NA	NA	NA	NA	NA	NA	Alas2,Cpox,Fech,Hba-a2,Urod	NA	NA
MSigDB Pathway	Porphyrin and chlorophyll metabolism									3.55245e-29			NA	NA	NA	NA	NA	NA	NA	NA	Alas2,Blvrb,Cpox,Fech,Ppox,Urod	NA	NA
PANTHER Pathway	Heme biosynthesis									2.13244e-20			NA	NA	NA	NA	NA	NA	NA	NA	Cpox,Fech,Ppox,Urod	NA	NA
Pathway Commons	Heme biosynthesis									8.11011e-22			NA	NA	NA	NA	NA	NA	NA	NA	Cpox,Fech,Ppox,Urod	NA	NA
Pathway Commons	heme biosynthesis from uroporphyrinogen-III I									1.63166e-22			NA	NA	NA	NA	NA	NA	NA	NA	Cpox,Fech,Ppox,Urod	NA	NA
Pathway Commons	heme biosynthesis II									7.17553e-27			NA	NA	NA	NA	NA	NA	NA	NA	Alas2,Cpox,Fech,Ppox,Urod	NA	NA
Pathway Commons	Metabolism of porphyrins									1.47567e-21			NA	NA	NA	NA	NA	NA	NA	NA	Cpox,Fech,Ppox,Urod	NA	NA
GO Biological Process	cellular response to interferon-alpha										4.02136e-24		NA	NA	NA	NA	NA	NA	NA	NA	NA	I830012O16Rik,Ifit1,Ifit2,Ifit3	NA
GO Biological Process	response to interferon-alpha										1.84453e-23		NA	NA	NA	NA	NA	NA	NA	NA	NA	I830012O16Rik,Ifit1,Ifit2,Ifit3	NA
Pathway Commons	Interferon alpha/beta signaling										8.67074e-21		NA	NA	NA	NA	NA	NA	NA	NA	NA	Ifit1,Ifit2,Ifit3,Itga2b	NA
Pathway Commons	Interferon Signaling										7.10527e-26		NA	NA	NA	NA	NA	NA	NA	NA	NA	Ifit1,Ifit2,Ifit3,Ifngr2,Itga2b	NA
Pathway Commons	Trafficking of dietary sterols										4.1526e-12		NA	NA	NA	NA	NA	NA	NA	NA	NA	Abcg5,Abcg8	NA
