# Supplementary material for: Dynamic shifts in occupancy by TAL1 are guided by GATA factors and drive large-scale reprogramming of gene expression during hematopoiesis
Source: Genome Res. 2014 Dec;24(12):1945–62. doi: 10.1101/gr.164830.113 (PMC4248312; doi:10.1101/gr.164830.113)
Supplement: Supplemental Material [file supp_gr.164830.113_Supplemental_Table4.xlsx]

## Sheet: tal1os_merged_HpcEproG1eEr4EblM
			Read counts per million mapped reads																										Whether bound in each cell type						Percentage covered by each chromatin state
chr	start	end	TAL1_HPC	TAL1_Epro	TAL1_G1E	TAL1_ER4	TAL1_Ebl	TAL1_Meg	H3K4m1_G1E	H3K4m3_G1E	H3K36m3_G1E	H3K27m3_G1E	H3K9m3_G1E	H3K4m1_ER4	H3K4m3_ER4	H3K36m3_ER4	H3K27m3_ER4	H3K9m3_ER4	H3K4m1_Ebl	H3K4m3_Ebl	H3K36m3_Ebl	H3K27m3_Ebl	H3K9m3_Ebl	H3K4m1_Meg	H3K4m3_Meg	H3K36m3_Meg	H3K27m3_Meg	H3K9m3_Meg	HPC	Epro	G1E	ER4	Ebl	Meg	state1_G1E	state2_G1E	state3_G1E	state4_G1E	state5_G1E	state6_G1E	state7_G1E	state8_G1E	state9_G1E	state1_ER4	state2_ER4	state3_ER4	state4_ER4	state5_ER4	state6_ER4
chr1	3441758	3442156	0.448617	0.0449987	0.110271	0.0930885	0.0384113	0.0493155	0.526617	0.124965	0.0231682	0.131204	0.0327253	0.0704544	0.120745	0.0241339	0.0777704	0.0585594	0.0587724	0.0449006	0.0285064	0.0685895	0.0800926	0.449767	0.130556	0.0752834	0.0482432	0.0485255	1	0	0	0	0	0	0	0	1	0	0	0	0	0	0	0	0	0	0	0	0
chr1	3905037	3905435	1.08782	0	0.0459231	0.0698163	0.0446002	0.0365237	0.0863005	0.0978516	0.0063032	0.0669393	0.0178162	0.0935955	0.0772587	0.0200352	0.0551046	0.0328788	0.0649306	0.0212042	0.0162835	0.0505197	0.0544319	0.163028	0.0294741	0.025662	0.0502148	0.0897918	1	0	0	0	0	0	0	0	0	0	0	0	1	0	0	0	0	0.08794	0	0	0
chr1	3945236	3945665	0.150377	0	0.0434975	0.0798727	0.0962456	0.0681808	0.0521728	0.0305523	0.0240917	0.134848	0.0228888	0.0518233	0.0943927	0.0155604	0.0653052	0.0618308	0.042845	0.0283148	0.0163753	0.0584594	0.0830789	0.0234015	0.042056	0.0250432	0.0736829	0.0995285	0	0	0	0	0	1	0	0	0	0	0	0	1	0	0	0	0	0	0	0	0
chr1	4407932	4408330	0.633401	0.0224993	0.156744	0.0307751	0.0571571	0.030509	0.235647	0.0608833	0.0102362	0.176956	0.0306628	0.207992	0.0579314	0.0141837	0.172496	0.0397382	0.0378524	0.0134742	0.0040743	0.0727725	0.0143545	0.211201	0.0467612	0.0281334	0.0451431	0.0526618	1	0	0	0	0	0	0	0	0.829146	0	0	0	0.170854	0	0	0	0	0	0	0	0
chr1	4414257	4415174	0.117028	0.0488261	0.254995	0.0522696	0.0423793	0.0201678	0.343454	0.230034	0.0195911	0.0798276	0.0362932	0.511029	0.126789	0.0274039	0.102958	0.0962802	0.116205	0.0318842	0.0124021	0.0465706	0.0473527	0.110519	0.0608337	0.0256428	0.0402191	0.0604365	0	0	1	0	0	0	0	0	0.592148	0.407852	0	0	0	0	0	0	0	1	0	0	0
chr1	4463020	4463925	0.0808676	0	0.471071	0.0711945	0.0445043	0.0276817	0.348129	0.132724	0.0085623	0.265132	0.0381393	0.221067	0.113916	0.020059	0.243305	0.0492811	0.105916	0.0217743	0.0232873	0.0834841	0.028707	0.0353978	0.0361958	0.0191414	0.137775	0.0777929	0	0	1	0	0	0	0	0	0.801105	0	0	0	0.198895	0	0	0	0	0	0	0	0
chr1	4464321	4465231	0.0571876	0.0185873	0.459582	0.0702471	0.0653551	0.0304643	0.449359	0.155308	0.022527	0.208477	0.0376034	0.288298	0.114633	0.0226849	0.23269	0.0661867	0.116281	0.0238173	0.0179391	0.122392	0.0339587	0.0868759	0.0409827	0.0297494	0.189589	0.0832538	0	0	1	0	0	0	0	0	1	0	0	0	0	0	0	0	0	0.526374	0	0	0
chr1	4613317	4613715	0.406321	0	0.131376	0.0681628	0.0652186	0.061445	0.15345	0.0782724	0.0377932	0.240798	0.0326663	0.426672	0.0836759	0.0468925	0.132678	0.0404368	0.0827372	0.0267485	0.0188129	0.0785407	0.0756201	0.422897	0.306165	0.0533148	0.0367943	0.0239019	1	0	0	0	0	0	0	0	0	0	0	0	1	0	0	0	0	1	0	0	0
chr1	4764962	4765850	0.690364	0.0302525	0.121925	0.154121	0.053718	0.0922342	0.421866	0.154413	1.55791	0.0603511	0.0516617	0.489003	0.156476	1.38158	0.0871368	0.0538019	0.116353	0.0419871	0.65437	0.0482202	0.0465978	0.693501	0.300426	0.241449	0.0507411	0.0309377	1	0	0	0	0	1	0	1	0	0	0	0	0	0	0	0.042793	0.957207	0	0	0	0
chr1	4775612	4776750	0.42821	0.0786881	0.67247	0.195205	0.139883	0.0303345	0.181317	1.94629	0.0587553	0.0276945	0.0263872	0.19711	1.3744	0.0662839	0.0309808	0.0262853	0.27599	1.81532	0.0431544	0.0282382	0.0241227	0.145123	1.32443	0.0314482	0.0239248	0.0141653	1	0	1	1	1	0	0	0	0	0.13181	0.86819	0	0	0	0	0	0	0	0.13181	0.86819	0
chr1	4797773	4798171	0.613283	0.134996	0.0750721	0.000890186	0.043479	0.0134367	0.0853276	3.85916	0.0659621	0.0328008	0.0304467	0.103788	2.87319	0.073804	0.0227248	0.0493711	0.219809	2.47296	0.0336335	0.0893796	0.0413145	0.0651416	2.16088	0.0271448	0.0263516	0.0238186	1	0	0	0	0	0	0	0	0	0.067839	0.932161	0	0	0	0	0	0	0	0.067839	0.932161	0
chr1	4847523	4847921	0.68266	0.117496	0.0967276	0.0409486	0.0581664	0.0249802	0.115422	2.44538	0.0661704	0.0738373	0.0590862	0.117668	1.53748	0.0622894	0.0326742	0.0401193	0.184605	2.41256	0.0550029	0.0476902	0.0481856	0.0823899	1.82233	0.0307559	0.0287991	0.0342288	1	0	0	0	0	0	0	0	0	0	1	0	0	0	0	0	0	0	0	1	0
chr1	4863828	4864798	0.0860835	0	0.147921	0.180957	0.207591	0.0422013	0.24394	0.0784399	0.576306	0.0190325	0.0237036	0.719382	0.141349	0.304218	0.0321112	0.0234889	0.677621	0.32582	0.272592	0.0391692	0.024815	0.333673	0.0861061	0.198289	0.0138697	0.0178944	0	0	0	0	1	0	0.616495	0.383505	0	0	0	0	0	0	0	0	1	0	0	0	0
chr1	5073069	5073467	0.872346	0.157495	0.0428297	0.0553186	0.056664	0.0279121	0.221268	3.35986	0.0610655	0.0609562	0.0423111	0.164466	2.5221	0.0588788	0.0207034	0.045772	0.523011	2.26494	0.0367644	0.0946833	0.0306954	0.135448	2.11524	0.0455297	0.0537366	0.00961907	1	0	0	0	0	0	0	0	0	0.329146	0.670854	0	0	0	0	0	0	0	0.329146	0.670854	0
chr1	5160658	5160707	0.101597	0.218284	0.172544	0.0867663	0.0678446	0.0235424	0.180243	0.183266	0.0632564	0.383628	0.78961	0.0919681	0.178243	0.0796149	0.157961	0.551137	0.0725377	0.0208928	0.118714	0.115465	0.482001	0.060432	0.189612	0.08855	0.101718	0.49054	0	1	0	0	0	0	0	0	0	0	0	1	0	0	0	0	0	0	0	0	1
chr1	6204441	6204839	0.800906	0.382488	0.0996147	0.115979	0.0708357	0.0256503	0.0843853	3.63868	0.0277784	0.0333639	0.0340414	0.0976008	2.3962	0.0652558	0.0299072	0.0472751	0.12201	2.49999	0.0565619	0.0557959	0.0361548	0.0611802	2.19086	0.0513102	0.0359649	0.0359083	1	1	0	0	0	0	0	0	0	0	1	0	0	0	0	0	0	0	0	1	0
chr1	6296711	6297109	0.637784	0	0.102708	0.0583711	0.0651401	0.0234221	0.120073	0.0884913	0.0144817	0.2049	0.0190341	0.12562	0.149635	0.0369693	0.180758	0.0344878	0.0641524	0.0441277	0.0238032	0.0658151	0.0787685	0.0629069	0.0457678	0.0289298	0.108792	0.0753976	1	0	0	0	0	0	0	0	0	0	0	0	1	0	0	0	0	0	0	0	0
chr1	7480368	7481151	0.0244484	0	0.294896	0.058241	0.0392542	0.0249861	0.537957	0.0670666	0.0107835	0.163472	0.00733866	0.143047	0.100556	0.0132747	0.100099	0.0267527	0.0507734	0.0154525	0.0192503	0.0574171	0.0530308	0.0340977	0.0309117	0.0185854	0.0478209	0.0771294	0	0	1	0	0	0	0	0	1	0	0	0	0	0	0	0	0	0	0	0	0
chr1	7553254	7553702	0.0916463	0	0.0796412	0.0260976	0.0642445	0.0604965	0.0471246	0.0141896	0.0142075	0.0791034	0.028689	0.0860561	0.0437974	0.0134751	0.0706946	0.0715467	0.0220546	0.0191574	0.0182558	0.0402791	0.0496889	0.0317055	0.0178438	0.0184676	0.0198833	0.0612121	0	0	0	0	0	1	0	0	0	0	0	0	1	0	0	0	0	0	0	0	0
chr1	9387133	9387285	0.16916	0.680768	0.135187	0.155171	0.107358	0.0414341	0.120507	0.25453	0.0558558	0.409712	0.0879516	0.156597	0.27669	0.0514014	0.233336	0.085536	0.105693	0.0501823	0.0743915	0.0860405	0.224535	0.158795	0.14087	0.0429983	0.0968413	0.229915	0	1	0	0	0	0	0	0	0	0	0	0	1	0	0	0	0	0	0	0	0
chr1	9736579	9737025	0.18446	0	0.207787	0.331939	0.0703056	0.0375716	0.932504	1.26241	0.694053	0.0146354	0.035654	0.481935	1.16859	0.786758	0.0636741	0.0255995	0.772899	1.86264	0.781527	0.0668797	0.0526877	0.378494	1.338	0.296035	0.0313905	0.00884395	0	0	0	1	0	0	0	0	0	1	0	0	0	0	0	0	0	0	1	0	0
chr1	9738253	9738651	0.896073	0.202494	0.0395985	0.0743943	0.0774166	0.0385928	0.113811	2.42318	0.0526396	0.0316043	0.0112751	0.0603215	1.8523	0.0908997	0.042447	0.0446287	0.126243	2.17229	0.0567392	0.0511895	0.0625774	0.0654356	1.768	0.0239869	0.0232922	0.0258312	1	0	0	0	0	0	0	0	0	0	1	0	0	0	0	0	0	0	0	1	0
chr1	9765836	9767085	0.17258	0.0215085	0.272081	0.381891	0.188522	0.0281165	1.08037	0.162143	0.0489687	0.113449	0.051239	1.33164	0.217496	0.0938785	0.0695494	0.0436147	1.203	0.342823	0.118781	0.0422407	0.0335794	0.12504	0.066173	0.0271746	0.094872	0.0277457	0	0	1	1	1	0	0	0	1	0	0	0	0	0	0	0	0	0.679744	0.320256	0	0
chr1	9770112	9771780	0.0552297	0.171793	0.972053	0.260017	0.237372	0.0273739	0.682752	0.14326	0.0429728	0.0590521	0.0153499	0.673852	0.0992047	0.0900299	0.0417304	0.0603164	1.02681	0.129461	0.13457	0.0532112	0.0259164	0.0970914	0.0507501	0.0352189	0.0835349	0.0366105	0	1	1	1	1	0	0	0	0.947242	0	0	0	0.052758	0	0	0	0	0.947242	0	0	0
chr1	9805003	9805832	0.0201202	0	0.402402	0.064961	0.0545752	0.016268	0.350973	0.0740125	0.0329937	0.0366657	0.0191063	0.284842	0.0579572	0.0598167	0.0285659	0.0202369	0.433256	0.0219918	0.145365	0.03165	0.013915	0.0447526	0.0137724	0.0299007	0.0340632	0.0161133	0	0	1	0	0	0	0	0	1	0	0	0	0	0	0	0	0	1	0	0	0
chr1	9823026	9824189	0.128945	0.100096	0.497187	0.211289	0.0604342	0.0249408	0.859376	0.275202	0.0557361	0.0476944	0.0384242	1.02766	0.187616	0.165606	0.0610124	0.0336465	0.273137	0.0388547	0.509617	0.0614787	0.0279522	0.245379	0.0527008	0.0524899	0.0850524	0.0208767	0	0	1	1	0	0	0	0	0.656062	0.343938	0	0	0	0	0	0	0	1	0	0	0
chr1	9933968	9934366	0.96622	0.0899972	0.128489	0.0671455	0.0595341	0.0269823	0.0820447	2.7056	0.0926727	0.00957281	0.0458076	0.0901451	2.10589	0.105569	0.0277093	0.0328999	0.285819	2.38804	0.122817	0.0611539	0.0446376	0.0813599	1.91279	0.0387881	0.0328239	0.03595	1	0	0	0	0	0	0	0	0	0	1	0	0	0	0	0	0	0	0	1	0
chr1	10027767	10028165	0.494652	0.199369	0.119414	0.0338272	0.0733582	0.0340105	0.154362	3.84217	0.0771101	0.0208349	0.0303877	0.0886976	3.10255	0.0985985	0.0396211	0.0455391	0.229231	2.53215	0.0829761	0.103104	0.0763823	0.0549447	2.26789	0.0704641	0.053723	0.0677496	1	0	0	0	0	0	0	0	0	0	1	0	0	0	0	0	0	0	0	1	0
chr1	10069907	10070351	0.023118	0	0.0868293	0.0482197	0.0820694	0.0697071	0.0830271	0.0581742	0.233991	0.0482682	0.0619271	0.109779	0.091497	0.234391	0.0108008	0.0096217	0.0725127	0.0331046	0.154961	0.048165	0.0325994	0.0429547	0.0372254	0.12389	0.0295573	0.0142962	0	0	0	0	0	1	1	0	0	0	0	0	0	0	0	1	0	0	0	0	0
chr1	10222905	10223303	0.636753	0.0674979	0.0507355	0.0169136	0.031987	0.0144838	0.189624	3.74126	0.0610655	0.00943201	0.03907	0.244618	2.64033	0.0653368	0.0100868	0.0519963	0.257798	2.4215	0.0345632	0.175452	0.0293211	0.061903	2.17218	0.0182201	0.0232242	0.0244987	1	0	0	0	0	0	0	0	0	0.258794	0.741206	0	0	0	0	0	0	0	0.761307	0.238693	0
chr1	10314997	10316369	0.515725	0.0913747	1.15809	0.13465	0.0512218	0.0282664	0.816709	0.390533	0.0377407	0.0194182	0.017465	0.789753	0.239886	0.0573918	0.0354884	0.0400855	0.274045	0.0394001	0.0219604	0.0463008	0.034773	0.364709	0.266837	0.0400609	0.0579905	0.0323892	1	0	1	0	0	0	0	0	0.585277	0.414723	0	0	0	0	0	0	0	0.708455	0.291545	0	0
chr1	10447614	10448467	0.204446	0	0.426556	0.0593358	0.056461	0.0311907	1.21678	0.204511	0.0740904	0.0438116	0.0367708	0.621806	0.172608	0.054485	0.0588573	0.066915	0.0937997	0.0372613	0.0402405	0.0582282	0.0422027	0.0808806	0.0453661	0.0224929	0.0851731	0.0763892	0	0	1	0	0	0	0	0	1	0	0	0	0	0	0	0	0	1	0	0	0
chr1	10448851	10449924	0.124359	0	0.951888	0.13236	0.0475378	0.0347294	0.734522	0.118266	0.0458325	0.044489	0.0402772	0.295776	0.0908249	0.0351971	0.0497158	0.065964	0.060517	0.0166201	0.0194434	0.0448598	0.0547686	0.0816299	0.0314767	0.0252709	0.0730659	0.0767234	0	0	1	0	0	0	0	0	1	0	0	0	0	0	0	0	0	0.51165	0	0	0
chr1	10474624	10476007	0.116746	0.0129497	0.519194	0.150047	0.0650142	0.0340202	1.45697	0.283678	0.0608229	0.0359956	0.0359749	0.876172	0.180186	0.0616847	0.0758394	0.0613102	0.0929062	0.030971	0.0198381	0.0741679	0.0590377	0.4049	0.0731729	0.0346609	0.0842558	0.0479377	0	0	1	0	0	0	0	0	0.421547	0.578453	0	0	0	0	0	0	0	1	0	0	0
chr1	11222467	11222921	0.09247	0.039448	0.0098236	0.0328877	0.0829253	0.07094	0.0646495	0.10447	0.014602	0.0858947	0.0374365	0.0405386	0.096056	0.0200814	0.0929164	0.0999994	0.044855	0.0407877	0.0230606	0.0879772	0.0374998	0.0445776	0.0781419	0.0243743	0.0530564	0.0742137	0	0	0	0	0	1	0	0	0	0	0	0	1	0	0	0	0	0	0	0	0
chr1	12634460	12635336	0.6093	0	0.292885	0.552822	0.102433	0.0580793	0.0585865	0.109896	0.0267326	0.291978	0.0464435	0.0720745	0.146832	0.0225057	0.171944	0.0772778	0.0360024	0.0528561	0.0462591	0.0775533	0.140437	0.032326	0.0547095	0.0276602	0.0769007	0.153288	0	0	1	1	0	1	0	0	0	0	0	0	1	0	0	0	0	0	0	0	0
chr1	12761849	12762307	0.157104	0	0.0921207	0.0435409	0.0805933	0.0652612	0.0424503	0.071992	0.0225662	0.175366	0.0372802	0.0498515	0.104796	0.00711182	0.25406	0.035489	0.0527342	0.0266493	0.0343956	0.102294	0.0708164	0.00900048	0.0496676	0.0249967	0.0509624	0.103045	0	0	0	0	0	1	0	0	0	0	0	0	1	0	0	0	0	0	0	0	0
chr1	13034551	13034959	0.140884	0	0.0667942	0.080138	0.0944294	0.0627093	0.135515	0.0644381	0.0384803	0.0828075	0.041983	0.0495775	0.0969926	0.0288427	0.130633	0.0798003	0.0537752	0.0372087	0.0251004	0.0725619	0.0415327	0.0322684	0.0516657	0.0504812	0.0860838	0.0811865	0	0	0	0	0	1	0	0	0	0	0	0	1	0	0	0	0	0	0	0	0
chr1	13144260	13145608	1.05484	0.325507	1.48178	0.915063	0.0636501	0.0890249	0.700661	0.218025	0.164429	0.005154	0.0199856	0.807944	0.153501	0.25227	0.040066	0.0330606	0.293661	0.0433165	0.250907	0.0486467	0.0185536	0.457609	0.174965	0.203401	0.0384	0.0204869	1	1	1	1	0	1	0	0.25816	0.445104	0.296736	0	0	0	0	0	0	0.451039	0.548961	0	0	0
chr1	13152389	13152787	0.963125	0	0.11962	0.216316	0.0745465	0.0612273	0.246073	0.10689	1.21676	0.123039	0.024652	0.39671	0.151397	1.03816	0.0614039	0.056781	0.118555	0.042595	0.476816	0.0807412	0.0317448	0.805408	0.157873	0.393291	0.0684216	0.0481646	1	0	0	0	0	0	1	0	0	0	0	0	0	0	0	0	1	0	0	0	0
chr1	13196871	13197626	0.33689	0.0355816	0.137786	0.0601998	0.0517506	0.0879656	0.682514	0.113882	0.382679	0.0382185	0.0260321	0.637812	0.171412	0.255724	0.0618418	0.038615	0.134006	0.038866	0.146186	0.0664276	0.0356024	0.558672	0.170087	0.107006	0.0288506	0.0182633	1	0	0	0	0	1	0.034437	0.965563	0	0	0	0	0	0	0	0	0.794702	0.170861	0	0	0
chr1	13234524	13235292	0.1124	0.0699588	0.0813718	0.345595	0.0710825	0.0256955	0.395532	0.0982703	0.223418	0.0204637	0.0189646	1.214	0.234266	0.070353	0.0571339	0.0268801	0.310753	0.0254721	0.050497	0.0553368	0.0447824	0.526143	0.202465	0.10871	0.0454078	0.0138109	0	0	0	1	0	0	0	0	1	0	0	0	0	0	0	0	0	1	0	0	0
chr1	13293982	13294473	0.12334	0.0547131	0.194985	0.345223	0.0543106	0.0353095	0.683847	0.118489	0.399001	0.0379423	0.0559674	1.3417	0.191098	0.259944	0.0656646	0.108853	0.325844	0.0313726	0.154169	0.0445406	0.0323853	0.339662	0.0403297	0.190585	0.0517807	0.0234476	0	0	0	1	0	0	0	0.96334	0.03666	0	0	0	0	0	0	0	0.814664	0.185336	0	0	0
chr1	13362512	13362910	0.470538	0.0224993	0.0816717	0.0169136	0.0484235	0.0315394	0.115574	3.2377	0.0347848	0.0154854	0.0499129	0.159588	2.42755	0.0589458	0.0346366	0.0598296	0.280206	2.52009	0.0497393	0.0650632	0.04921	0.0587852	2.1085	0.0355889	0.0286631	0.0243322	1	0	0	0	0	0	0	0	0	0	1	0	0	0	0	0	0	0	0	1	0
chr1	13503825	13504223	0.657384	0	0.20961	0.0676541	0.0620232	0.0322514	0.627662	0.996929	0.0440834	0.342508	0.252904	0.718762	0.360825	0.0861674	0.215571	0.350721	0.197209	0.153814	0.054046	0.125329	0.210158	0.324262	0.562176	0.0819426	0.146946	0.293499	1	0	0	0	0	0	0	0	0	1	0	0	0	0	0	0	0	0	0	0	0
chr1	13556067	13556899	0.206707	0.0538144	0.648321	0.346569	0.116298	0.030343	1.20726	0.38365	0.584101	0.0373414	0.0241867	1.16398	0.259379	0.70975	0.0536496	0.0222401	0.728725	0.147439	0.537291	0.05278	0.0345725	0.128422	0.0630328	0.792179	0.0579028	0.0229474	0	0	1	1	1	0	0	1	0	0	0	0	0	0	0	0	1	0	0	0	0
chr1	13558598	13559535	0.259623	0.124238	0.340513	0.261171	0.155589	0.0371299	1.34504	0.33422	1.54188	0.0901725	0.0429527	1.2944	0.278543	1.41495	0.0989266	0.0464291	0.774703	0.104723	0.957397	0.0919833	0.0457901	0.17352	0.0726927	1.01388	0.0876386	0.0204231	0	0	1	0	1	0	0	1	0	0	0	0	0	0	0	0	1	0	0	0	0
chr1	13563662	13565460	0.489101	0.0547842	1.04421	0.385626	0.177681	0.0526142	0.964844	0.519723	0.38896	0.00708932	0.0326501	1.09837	0.323796	0.472382	0.0478007	0.0284697	1.16097	0.382739	0.401543	0.056205	0.0300767	0.604192	0.296476	0.384201	0.0505115	0.0244725	1	0	1	1	1	1	0	0	0.144605	0.855395	0	0	0	0	0	0	0.076752	0.144605	0.778643	0	0
chr1	13579642	13580040	0.473375	0.0449987	0.0593289	0.0169136	0.0276032	0.0303414	0.125758	2.75737	0.0399811	0.0168932	0.0208216	0.0470555	2.13589	0.0263316	0.0237452	0.0200067	0.142534	2.05613	0.0369012	0.0312604	0.0326318	0.0303628	1.70566	0.0241791	0.0158545	0.0123812	1	0	0	0	0	0	0	0	0	0	1	0	0	0	0	0	0	0	0.100503	0.899498	0
chr1	13603449	13604394	0.12654	0	0.287454	0.106637	0.0573436	0.0370485	0.377933	0.124411	0.0389646	0.213236	0.1232	0.190823	0.142544	0.0610198	0.183821	0.194202	0.0881758	0.0451181	0.0530159	0.0786897	0.107968	0.126981	0.105486	0.175598	0.149192	0.410527	0	0	1	0	0	0	0	0	0.840212	0	0	0	0.159788	0	0	0	0	0	0	0	0
chr1	14300135	14300674	0.153966	0.0581475	0.0381232	0.246213	0.0192812	0.024928	0.0901662	0.0627584	0.0217137	0.417775	0.0271379	0.238376	0.367189	0.0301157	0.147253	0.0368154	0.0636447	0.0691145	0.0194542	0.395032	0.0321857	0.153245	0.581038	0.0168603	0.211118	0.0345708	0	0	0	1	0	0	0	0	0	0	0	0	0	0.879406	0.120594	0	0	0	0	0.371058	0
chr1	14474272	14475259	0.121415	0	1.01933	0.138764	0.0898329	0.0422886	0.590104	0.294237	0.0284735	0	0.0259568	0.751634	0.132369	0.168942	0.0353644	0.316188	0.352458	0.0597671	0.0850961	0.0896223	0.238682	0.451592	0.189152	0.0656754	0.0398231	0.0582886	0	0	1	0	0	0	0	0	0.465046	0.534954	0	0	0	0	0	0	0	1	0	0	0
chr1	15586731	15587111	0.0524024	0	0.0220331	0.0841784	0.1134	0.0680934	0.0442549	0.067837	0.0241701	0.0336174	0.00921694	0.0763462	0.0591204	0.017002	0.0681561	0.0158544	0.0239703	0.0250702	0.021494	0.0390546	0.0238798	0.0364681	0.0422388	0.0277835	0.0298642	0.032899	0	0	0	0	0	1	0	0	0	0	0	0	1	0	0	0	0	0	0	0	0
chr1	15759081	15760140	0.320242	0.0169117	0.234445	0.0786687	0.0783318	0.0359219	0.103962	0.118127	0.0395667	0.33128	0.0545261	0.254278	0.226356	0.0384391	0.293691	0.0717135	0.0827535	0.0487612	0.0348586	0.0833645	0.11446	0.0634629	0.0667222	0.0403426	0.111904	0.122345	0	0	1	0	0	0	0	0	0	0	0	0	0.622285	0.377715	0	0	0	0.509915	0	0	0
chr1	15925645	15927404	0.122747	0.025454	0.676164	0.447925	0.0700619	0.0316118	1.04638	0.317697	0.0467697	0.0254663	0.0210315	0.816594	0.256708	0.0483099	0.0522706	0.021197	0.265551	0.060601	0.0261775	0.0702243	0.0876116	0.0688244	0.0392051	0.0288176	0.0653715	0.135647	0	0	1	1	0	0	0	0	0.317794	0.682206	0	0	0	0	0	0	0	1	0	0	0
chr1	16217748	16218192	0.0947841	0.0403365	0.104947	0.101911	0.0994361	0.0649761	0.0793213	0.100722	0.0249705	0.302924	0.0253554	0.0383054	0.148751	0.0233134	0.307578	0.0325089	0.0786334	0.0313126	0.0175256	0.0576238	0.0479193	0.0758695	0.0622016	0.0240125	0.0731926	0.0675491	0	0	0	0	0	1	0	0	0	0	0	0	1	0	0	0	0	0	0	0	0
chr1	16609085	16609483	0.67995	0.134996	0.0477107	0.0169136	0.0269754	0.0222241	0.122991	3.23259	0.0432238	0.0206237	0.0233948	0.10579	2.81244	0.0526765	0.0285335	0.0383621	0.145988	2.31334	0.066898	0.0562605	0.0758577	0.0603105	2.11949	0.040985	0.036536	0.0195296	1	0	0	0	0	0	0	0	0	0	1	0	0	0	0	0	0	0	0	1	0
chr1	16617654	16618090	0.158674	0	0.0945726	0.11597	0.114074	0.0676827	0.11205	0.100376	0.0405979	0.304176	0.046513	0.110545	0.146288	0.0294027	0.379252	0.0712161	0.147014	0.0386879	0.0364557	0.143853	0.0413744	0.104758	0.0482149	0.0912572	0.104077	0.0594504	0	0	0	0	0	1	0	0	0	0	0	0	1	0	0	0	0	0	0	0	0
chr1	16642989	16643989	0.0775476	0.0273616	0.627014	0.277109	0.152935	0.0259422	1.09527	0.311447	0.391027	0.0271461	0.0239541	0.983979	0.254265	0.348575	0.035592	0.0248992	0.972454	0.251242	0.210059	0.0282888	0.0268649	0.51002	0.102047	0.213515	0.0271723	0.0182249	0	0	1	1	1	0	0	0.811	0.189	0	0	0	0	0	0	0	1	0	0	0	0
chr1	16646838	16647236	0.634818	0.274368	0.062285	0.0492147	0.0515288	0.025265	0.11679	2.66481	0.0755733	0.0371649	0.0407789	0.130141	1.8613	0.0508968	0.0450178	0.0360121	0.211971	2.45009	0.0281236	0.0639834	0.0371293	0.0557074	2.13647	0.0401749	0.0150386	0.0208482	1	0	0	0	0	0	0	0	0	0	1	0	0	0	0	0	0	0	0	1	0
chr1	16655182	16655580	0.982858	0.129996	0.111233	0.00368792	0.0284329	0.0210681	0.266076	3.36786	0.0562207	0.0272402	0.0314878	0.200695	2.59451	0.0810847	0.02924	0.0613963	0.352429	2.23625	0.0521456	0.0724852	0.0434133	0.151894	2.02482	0.0555527	0.0230067	0.02064	1	0	0	0	0	0	0	0	0	0.045226	0.954774	0	0	0	0	0	0	0	0.045226	0.954774	0
chr1	16693230	16693939	0.300766	0.0126301	0.211945	0.147058	0.0433324	0.0270673	0.264375	0.119511	0.185565	0.0841225	0.0415376	0.466305	0.138499	0.115859	0.0893737	0.158397	0.0773518	0.0212474	0.0536861	0.0384034	0.0202045	0.110175	0.0343149	0.075596	0.0503696	0.0192145	1	0	1	0	0	0	0	0	0	0	0	0	1	0	0	0	0	1	0	0	0
chr1	17025428	17025874	0.0715747	0	0.0239873	0.0685439	0.0717964	0.0657986	0.0991207	0.0693121	0.0224296	0.0901364	0.0218061	0.055546	0.110962	0.0144018	0.195067	0.0247871	0.0365691	0.0329205	0.0128351	0.037642	0.0406251	0.0428218	0.0492313	0.0304845	0.0280779	0.0579439	0	0	0	0	0	1	0	0	0	0	0	0	1	0	0	0	0	0	0	0	0
chr1	19445094	19445492	0.712191	0	0.122714	0.0385325	0.0492531	0.0167791	0.0699157	0.0906812	0.0271793	0.00457525	0.132218	0.0434466	0.0752454	0.0204531	0.0476082	0.0857433	0.035927	0.0254957	0.0158734	0.0567251	0.0814793	0.0778406	0.020873	0.00837547	0.0448168	0.0781045	1	0	0	0	0	0	0	0	0	0	0	0	1	0	0	0	0	0	0	0	0
chr1	20049441	20049831	0.140017	0	0.118566	0.276039	0.0660187	0.0418379	0.0806875	0.100625	0.0214505	0.0995594	0.120957	0.0466649	0.12656	0.0327606	0.107923	0.102539	0.0470458	0.0348593	0.0383278	0.0520163	0.0722245	0.0462803	0.0709005	0.0211721	0.0809676	0.112144	0	0	0	1	0	0	0	0	0	0	0	0	1	0	0	0	0	0	0	0	0
chr1	20810098	20810496	0.444232	0.0506235	0.0609101	0.049469	0.0396446	0.0280126	0.0845981	2.68052	0.0267756	0.0337863	0.020527	0.0795364	2.02252	0.0553328	0.0547513	0.0266121	0.171961	2.21915	0.0790522	0.0400084	0.0430634	0.0943268	1.87445	0.0325408	0.0175269	0.0146853	1	0	0	0	0	0	0	0	0	0	1	0	0	0	0	0	0	0	0	1	0
chr1	20880635	20881033	0.432756	0.134996	0.0704661	0.02696	0.0364605	0.0169634	0.327298	0.230888	0.0305914	0.997541	0.052938	0.238986	0.179733	0.0184307	0.270263	0.0852141	0.335687	0.518883	0.0199203	0.840711	0.0491726	0.18231	1.97322	0.0350123	0.084154	0.0320496	1	0	0	0	0	0	0	0	0	0	0	0	0	0.082915	0.917085	0	0	0	0	0	0
chr1	20918315	20919204	0.59416	0.0100728	0.295312	0.0888729	0.0633351	0.0348444	0.866272	0.17819	0.0511791	0.0442433	0.0352906	0.670603	0.17178	0.0631437	0.100296	0.046301	0.156215	0.0298692	0.0242756	0.0698288	0.0301522	0.379334	0.0654508	0.055298	0.0901307	0.0333512	1	0	1	0	0	0	0	0	1	0	0	0	0	0	0	0	0	1	0	0	0
chr1	21069391	21069789	0.599359	0.0899972	0.0306612	0.021746	0.0495333	0.0148692	0.336842	2.31174	0.0247831	0.0482864	0.0107251	0.369008	0.934679	0.0280708	0.051219	0.0395477	0.563936	1.09873	0.0189359	0.10026	0.0179275	0.138713	1.61239	0.03136	0.0280649	0.0165314	1	0	0	0	0	0	0	0	0	0.497487	0.502513	0	0	0	0	0	0	0	1	0	0
chr1	21078711	21079379	0.113016	0	0.350251	0.0624333	0.0431597	0.0357659	0.719605	0.144063	0.0254117	0.327829	0.0366436	0.542291	0.11142	0.0229343	0.256726	0.0447417	0.161905	0.0174139	0.012276	0.0800715	0.024943	0.16715	0.0454938	0.0265953	0.0921369	0.0219734	0	0	1	0	0	0	0	0	1	0	0	0	0	0	0	0	0	0	0	0	0
chr1	21079661	21080701	0.233318	0.0430516	0.585666	0.0623908	0.0750088	0.0291536	0.901987	0.237621	0.036103	0.441066	0.0463663	0.707426	0.152984	0.0508694	0.499475	0.0653834	0.280739	0.0465052	0.0488847	0.145263	0.036498	0.446921	0.0633515	0.0627436	0.11859	0.0431962	0	0	1	0	0	0	0	0	0.133654	0	0	0	0	0	0.866346	0	0	0	0	0	0
chr1	21084780	21085178	0.807742	0	0.215317	0.0967762	0.072024	0.0524231	1.05731	0.246238	0.0629801	0.305554	0.0671202	0.999132	0.181067	0.0722666	0.301485	0.0829697	0.151287	0.0408357	0.0476748	0.113929	0.043913	0.659724	0.402158	0.0611687	0.0498478	0.0415854	1	0	0	0	0	0	0	0	1	0	0	0	0	0	0	0	0	1	0	0	0
chr1	21208537	21208935	0.581694	0.179994	0.0922589	0.0465441	0.055083	0.0340442	0.366511	1.72826	0.0286769	0.279582	0.0444522	0.246026	0.869751	0.0345694	0.237531	0.0712832	0.490224	1.74048	0.0195649	0.0586117	0.0379538	0.173759	1.80233	0.0267329	0.0321032	0.0273025	1	0	0	0	0	0	0	0	0.158291	0.339196	0.502513	0	0	0	0	0	0	0	0	0.841709	0
chr1	21308115	21308970	0.180438	0	0.440182	0.0797978	0.0327545	0.0222737	0.832912	0.0858725	0.0318752	0.0471823	0.0473281	0.316305	0.131344	0.0505102	0.0850467	0.0549817	0.120976	0.0189841	0.0369323	0.0481852	0.0427786	0.041442	0.0350305	0.0222869	0.0659154	0.0539319	0	0	1	0	0	0	0	0	1	0	0	0	0	0	0	0	0	0.467836	0	0	0
chr1	21323483	21324287	0.0910263	0.077964	0.261091	0.0231035	0.0398607	0.0226748	0.4262	0.237539	0.0499819	0.0246346	0.158372	0.285276	0.146589	0.0568643	0.03606	0.115503	0.229329	0.0813867	0.0304021	0.043616	0.0616083	0.0485686	0.0265842	0.0416511	0.039437	0.118973	0	0	1	0	0	0	0	0	0.605721	0.394279	0	0	0	0	0	0	0	1	0	0	0
chr1	21333950	21334872	0.0709158	0.00971229	0.745585	0.0828918	0.0548006	0.0256056	0.736707	0.124634	0.0365523	0.0471263	0.089609	0.236842	0.103386	0.0377546	0.0757914	0.0604998	0.106615	0.0320507	0.024416	0.0680727	0.0592997	0.0678152	0.0383157	0.0452524	0.0723483	0.100451	0	0	1	0	0	0	0	0	1	0	0	0	0	0	0	0	0	0.72885	0	0	0
chr1	23157779	23158250	0.12411	0	0.14767	0.260697	0.058701	0.0304948	0.238477	0.109262	0.0158357	0.28193	0.0472893	0.342764	0.16874	0.0262265	0.195376	0.159542	0.0701676	0.0182106	0.0183925	0.0801472	0.0745093	0.0704685	0.0520331	0.0283559	0.0584375	0.0662691	0	0	0	1	0	0	0	0	0	0	0	0	1	0	0	0	0	0.849257	0	0	0
chr1	23288779	23290292	0.103323	0.0355112	1.44435	0.537612	0.278326	0.0306013	0.764411	0.217848	0.101437	0.0441049	0.0389501	0.688709	0.138615	0.205213	0.050414	0.0396857	0.995655	0.256837	0.265682	0.0500222	0.043097	0.179509	0.0446617	0.0490989	0.0788007	0.0454509	0	0	1	1	1	0	0	0	0.807006	0.192994	0	0	0	0	0	0	0.278255	0.721745	0	0	0
chr1	23314520	23315097	0.0394922	0.0155195	0.227854	0.0900871	0.0442205	0.0251584	0.717899	0.122256	0.0975646	0.0522905	0.151332	0.173532	0.121042	0.0995187	0.0776167	0.168114	0.203593	0.039383	0.181419	0.0442944	0.0586931	0.0480527	0.0283858	0.0245578	0.0554962	0.135754	0	0	1	0	0	0	0	0	0.861352	0	0	0	0.138648	0	0	0	0	0	0	0	1
chr1	23321508	23322066	0.018395	0	0.359622	0.0361914	0.0424714	0.0202552	0.397233	0.0648936	0.0207607	0	0.0328409	0.14162	0.046418	0.0270516	0.0231513	0.0663368	0.287752	0.0215788	0.0699306	0.0350783	0.0565034	0.0351239	0.0153372	0.0253451	0.0639418	0.0248596	0	0	1	0	0	0	0	0	0.88172	0	0	0	0.11828	0	0	0	0	0	0	0	0
chr1	23342208	23343395	0.12543	0.256496	1.45225	0.363932	0.268803	0.0332112	0.918291	0.320421	0.0384309	0.0312479	0.0419612	0.590077	0.164626	0.05131	0.056252	0.0204441	0.904753	0.261358	0.163709	0.0597683	0.0525499	0.200915	0.0633173	0.0385841	0.0851833	0.0789514	0	1	1	1	1	0	0	0	0.494524	0.505476	0	0	0	0	0	0	0	0.663016	0.336984	0	0
chr1	23390175	23390573	0.505612	0.134996	0.121133	0.0813886	0.0673038	0.0759291	0.514338	0.570534	0.0235719	0.083058	0.0173055	0.49213	0.29157	0.0536068	0.0389931	0.0126392	0.707741	0.579085	0.0415087	0.0433026	0.0219378	0.123244	0.689073	0.0213507	0.0260253	0.00392812	1	0	0	0	0	0	0	0	0	0.937186	0.062814	0	0	0	0	0	0	0.434673	0.502513	0.062814	0
chr1	23843222	23844191	0.0996782	0.0184824	0.537036	0.0764163	0.0438858	0.0210777	0.498746	0.157051	0.0580639	0.0138772	0.0253336	0.45281	0.113101	0.272164	0.0436544	0.108392	0.1713	0.0108277	0.0725931	0.0474175	0.021064	0.112613	0.024411	0.126832	0.0286894	0.0103988	0	0	1	0	0	0	0	0	1	0	0	0	0	0	0	0	0.816305	0.183695	0	0	0
chr1	23905522	23907081	0.103203	0.0574388	0.637877	0.171515	0.0726871	0.0243178	0.643531	0.214462	0.059143	0.0121115	0.0204149	0.730736	0.171042	0.295606	0.0377945	0.0429305	0.539736	0.0828592	0.165563	0.0438982	0.0255468	0.39976	0.142171	0.178248	0.0296482	0.0145462	0	0	1	1	0	0	0	0	0.615138	0.384862	0	0	0	0	0	0	0.819756	0.180244	0	0	0
chr1	23928190	23929158	0.383431	0.50879	0.508786	0.215578	0.220896	0.0381141	0.304637	2.97241	0.077052	0.0509066	0.0829849	0.203761	2.47176	0.164431	0.0438528	0.0679225	0.393804	2.31033	0.081145	0.0631407	0.0661644	0.101874	1.96795	0.0726609	0.0208922	0.0268171	1	1	1	1	1	0	0	0	0	0.413223	0.586777	0	0	0	0	0	0	0	0.619835	0.380165	0
chr1	23972918	23973580	0.14195	0.257008	0.145528	0.508504	0.114313	0.0338742	0.216914	0.102415	0.0235123	0.335454	0.0335982	0.80448	0.199487	0.0436095	0.293197	0.042347	0.40055	0.0868094	0.0319997	0.0776659	0.0356543	0.24091	0.0588555	0.0228822	0.134051	0.0729017	0	1	0	1	0	0	0	0	0	0	0	0	0	1	0	0	0	0.425982	0	0	0
chr1	24356244	24356680	0.105351	0.0154038	0.045435	0.0493366	0.0907699	0.0621538	0.0554144	0.0885785	0.0160846	0.0839149	0.0368303	0.031641	0.0893624	0.0280981	0.0958204	0.106215	0.0271117	0.0314735	0.021791	0.0696988	0.113369	0.030868	0.0417899	0.0257692	0.0564259	0.108181	0	0	0	0	0	1	0	0	0	0	0	0	1	0	0	0	0	0	0	0	0
chr1	27022036	27022480	0.0598759	0.0201683	0.135883	0.0783144	0.0952451	0.0648334	0.0507372	0.0712216	0.00654904	0.0757148	0.073654	0.0776951	0.0607273	0.00783158	0.0712787	0.0543143	0.036232	0.0134401	0.0165207	0.0348954	0.0598681	0.0582484	0.0384742	0.0225725	0.0383575	0.0647245	0	0	0	0	0	1	0	0	0	0	0	0	1	0	0	0	0	0	0	0	0
chr1	28042993	28043513	0.133536	0	0.0860831	0.0770885	0.0834956	0.0668155	0.0774535	0.0823536	0.0267434	0.0824274	0.178459	0.0466244	0.103877	0.0314947	0.0931539	0.0981963	0.0652594	0.0476987	0.0272076	0.0548096	0.116187	0.0395752	0.0659059	0.0218166	0.0484974	0.0787967	0	0	0	0	0	1	0	0	0	0	0	0	1	0	0	0	0	0	0	0	0
chr1	29092471	29092884	0.0248533	0.0216821	0.0491578	0.00220592	0.0744323	0.0648888	0.0354459	0.0375699	0.00739204	0.00773282	0.0456392	0.0223961	0.0591014	0.0235951	0.0496235	0.0534742	0.0456102	0.0134985	0.00557326	0.0388187	0.0486989	0.0533486	0.0225898	0.0147797	0.0421407	0.0414795	0	0	0	0	0	1	0	0	0	0	0	0	1	0	0	0	0	0	0	0	0
chr1	29731709	29732107	0.647202	0	0.149182	0.0507406	0.0311125	0.015355	0.132627	0.0433654	0.00888179	0.0168932	0.0478701	0.150388	0.0434108	0.0123096	0.0359514	0.0581995	0.0456769	0.0117549	0.0112248	0.0330373	0.0524709	0.0234445	0.0283717	0.0131674	0.0482705	0.0352004	1	0	0	0	0	0	0	0	0	0	0	0	1	0	0	0	0	0.771357	0	0	0
chr1	30496295	30496688	0.198889	0	0.0772804	0.0856437	0.0697384	0.0742737	0.0189328	0.0605056	0.00391708	0	0.064652	0.0191581	0.0637656	0.0156067	0.0489293	0.0538799	0.0270495	0.0052369	0.0126138	0.0526159	0.0640065	0.0292583	0.0394675	0.0128899	0.0448774	0.0417208	0	0	0	0	0	1	0	0	0	0	0	0	1	0	0	0	0	0	0	0	0
chr1	30930531	30930929	0.467056	0.136871	0.0399422	0.0212373	0.0310116	0.017667	0.192907	2.89638	0.0326881	0.026466	0.0179537	0.177971	1.97415	0.0539307	0.0167394	0.0134225	0.139598	2.14709	0.0265376	0.052242	0.0194516	0.070909	1.86223	0.0314012	0.0158273	0.0137692	1	0	0	0	0	0	0	0	0	0.324121	0.675879	0	0	0	0	0	0	0	0.324121	0.675879	0
chr1	31005402	31005835	0.264907	0.0206807	0.0309001	0.0562241	0.0945423	0.0631851	0.0882657	1.54139	0.0681359	0.00873431	0.0184344	0.0904592	0.793295	0.0977791	0.026678	0.0233323	0.168102	2.12381	0.0426273	0.0394506	0.01742	0.0506633	1.75186	0.0517944	0.00833634	0.0216254	0	0	0	0	0	1	0	0	0	0	1	0	0	0	0	0	0	0	0	1	0
chr1	31006483	31006881	0.482917	0.124996	0.0411798	0.0172951	0.0461027	0.0217886	0.109099	2.37305	0.0299793	0.0347013	0.0181108	0.0837998	1.50267	0.0323717	0.0222145	0.0251301	0.107849	1.97018	0.0195375	0.0683436	0.0194141	0.0435837	1.56638	0.0212683	0.0311787	0.019127	1	0	0	0	0	0	0	0	0	0	1	0	0	0	0	0	0	0	0	1	0
chr1	31437030	31437695	0.311174	0	0.0870216	0.0442203	0.0497158	0.112575	0.064513	0.0757678	0.0128216	0.104349	0.0437451	0.0401729	0.11382	0.028412	0.0985876	0.0791421	0.0346846	0.0335093	0.0223471	0.0484297	0.0877876	0.227498	0.0796597	0.0351793	0.0326576	0.0558253	1	0	0	0	0	1	0	0	0	0	0	0	1	0	0	0	0	0	0	0	0
chr1	31673421	31673819	0.550614	0.0674979	0.150969	0.0466713	0.0477172	0.0282305	0.196403	0.11436	0.0844029	0.0876333	0.124321	0.26879	0.141809	0.0573687	0.0518469	0.0901468	0.0830649	0.0398229	0.0674721	0.0701753	0.0775816	0.34127	0.197511	0.0819836	0.0793132	0.110071	1	0	0	0	0	0	0	0	0.449749	0	0	0	0.550251	0	0	0	0	0.449749	0	0	0
chr1	33556124	33557058	0.103853	0.0095875	1.1435	0.379005	0.0469207	0.0317983	0.914484	0.287459	0.241497	0.00719858	0.0243076	0.895705	0.222796	0.198218	0.0439523	0.0152824	0.228232	0.0456892	0.32183	0.0552405	0.0335758	0.143439	0.0530364	0.133375	0.0603229	0.0258119	0	0	1	1	0	0	0	0.295503	0.214133	0.490364	0	0	0	0	0	0	0.08137	0.91863	0	0	0
chr1	33578723	33579745	0.150652	0.131429	0.528382	0.161795	0.176836	0.0493648	0.357793	0.222586	0.706637	0.0679803	0.276519	0.819798	0.352449	0.416044	0.0881919	0.229607	0.301259	0.0804118	0.489401	0.0975132	0.112634	0.367359	0.390673	0.149733	0.105608	0.117001	0	0	1	0	0	0	0.412916	0.587084	0	0	0	0	0	0	0	0	0.782779	0.075342	0	0	0
chr1	33587811	33588631	0.0759818	0.0109204	0.1304	0.0671556	0.154008	0.0261397	0.477521	0.111753	0.414518	0.0245981	0.0487857	0.404396	0.119018	0.286483	0.0663979	0.120308	0.64704	0.11275	0.298301	0.054196	0.0357394	0.277536	0.0818829	0.143654	0.0403372	0.0461351	0	0	0	0	1	0	0	0.769512	0.230488	0	0	0	0	0	0	0.037805	0.731707	0.230488	0	0	0
chr1	33598056	33599350	0.0793233	0.041521	1.11093	0.0936391	0.047316	0.029388	0.725637	0.261908	0.0716237	0.00655982	0.0241908	0.756031	0.150224	0.183309	0.0432711	0.0517288	0.214439	0.0358271	0.286428	0.0496299	0.0283501	0.113485	0.0367983	0.166495	0.045937	0.0545349	0	0	1	0	0	0	0	0	0.420402	0.579598	0	0	0	0	0	0	0	0.845441	0.15456	0	0
chr1	33630854	33632124	0.151542	0.0564078	1.88417	0.193886	0.224213	0.0312507	0.594902	0.129086	0.0672143	0.00529407	0.0207144	0.754043	0.144679	0.201756	0.0279206	0.0569128	0.93741	0.194211	0.208307	0.0501266	0.0276526	0.17598	0.0521174	0.165325	0.0490465	0.0428855	0	0	1	1	1	0	0	0.097638	0.902362	0	0	0	0	0	0	0	0.370079	0.629921	0	0	0
chr1	33676621	33677583	0.0213397	0	0.566171	0.108646	0.0820043	0.0156755	0.486706	0.106457	0.0717082	0	0.0143844	0.345852	0.0490802	0.24337	0.0378666	0.0974261	0.516453	0.0656433	0.222519	0.0235929	0.0168756	0.10665	0.0194113	0.122773	0.0147444	0.0157174	0	0	1	0	0	0	0	0	0.7921	0.2079	0	0	0	0	0	0.5842	0.4158	0	0	0	0
chr1	33681402	33682436	0.118527	0.225167	1.24047	0.359875	0.107172	0.0501106	1.00002	0.274714	0.318807	0.0159038	0.032678	1.11671	0.169661	0.433905	0.0524067	0.0325799	0.955818	0.112146	0.713394	0.0614727	0.0422158	0.615264	0.163427	0.302607	0.0504484	0.0742369	0	1	1	1	0	0	0	0.613153	0	0.386847	0	0	0	0	0	0	1	0	0	0	0
chr1	33683570	33684541	0.044028	0.0184443	0.917045	0.1484	0.0644248	0.025316	0.756847	0.130619	0.240536	0.013964	0.0224152	0.718	0.119407	0.511192	0.0435886	0.0371148	0.719687	0.0437844	0.63126	0.0413138	0.0306885	0.30952	0.0378718	0.295143	0.0336909	0.0183823	0	0	1	0	0	0	0	0.442842	0.557158	0	0	0	0	0	0	0	1	0	0	0	0
chr1	33687410	33688641	0.0321023	0.320072	0.113024	0.960261	0.475896	0.0448295	0.665642	0.203182	1.32891	0.148743	0.0556463	0.85989	0.281626	1.14034	0.116122	0.938981	0.878405	0.0872316	1.15237	0.144052	0.475471	0.308372	0.188222	0.492503	0.0665762	0.0307946	0	1	0	1	1	0	0	1	0	0	0	0	0	0	0	0	1	0	0	0	0
chr1	33728640	33729560	0.0923797	0.175201	0.632525	0.127359	0.210153	0.0188881	0.523996	0.0749017	0.0427446	0.0327649	0.0335576	0.493929	0.0968389	0.0454659	0.0655904	0.00959844	0.85854	0.125881	0.035985	0.0348702	0.0220507	0.163284	0.0365438	0.0355975	0.0306351	0.0129102	0	1	1	0	1	0	0	0	0.826087	0	0	0	0.173913	0	0	0	0	0.608696	0	0	0
chr1	33811933	33812758	0.0890206	0.0108542	0.390888	0.150245	0.166364	0.0249144	0.675637	0.402762	0.388565	0.0214948	0.0405205	0.774398	0.237019	0.264557	0.0342806	0.0309264	0.904791	0.691485	0.227231	0.0499967	0.0434	0.215616	0.0616452	0.178049	0.0549637	0.0780841	0	0	1	0	1	0	0	0	0	1	0	0	0	0	0	0	0.566061	0.433939	0	0	0
chr1	33814373	33814771	0.678277	0.106247	0.0264677	0.0170407	0.0550942	0.0195938	0.372317	3.64452	0.0704554	0.0498347	0.024868	0.53744	2.44582	0.107267	0.0389931	0.0448405	0.592094	2.49065	0.0624545	0.0502873	0.0509842	0.239703	2.13847	0.0726746	0.0700803	0.0300925	1	0	0	0	0	0	0	0	0	0.932161	0.067839	0	0	0	0	0	0	0	0.932161	0.067839	0
chr1	33870193	33870956	0.307999	0.0234724	0.242523	0.295588	0.0653489	0.0400915	0.745412	2.24182	0.369638	0.0315393	0.0397351	0.596557	1.48658	0.494678	0.0577745	0.0326443	0.713214	1.96797	0.28783	0.0537242	0.0461706	0.389136	1.74755	0.168731	0.0387332	0.0213445	0	0	1	1	0	0	0	0	0	0.533421	0.466579	0	0	0	0	0	0	0	0.533421	0.466579	0
chr1	33871091	33871489	0.726505	0.0737476	0.0450982	0.0333184	0.0433557	0.0159163	0.271426	3.35249	0.055153	0.025199	0.0197019	0.14069	2.19181	0.0601323	0.0254329	0.0225473	0.249878	2.43544	0.0881308	0.0954764	0.0495348	0.0754184	2.10893	0.0430445	0.021171	0.0217088	1	0	0	0	0	0	0	0	0	0.223618	0.776382	0	0	0	0	0	0	0	0.223618	0.776382	0
chr1	34357155	34358077	0.135542	0.0582736	0.0952604	0.077787	0.143015	0.034465	0.105803	0.120389	0.0293172	0.163378	0.055726	0.131932	0.213908	0.0227389	0.184561	0.0419935	0.580947	0.177098	0.196573	0.0857386	0.070889	0.0621021	0.0751984	0.0895325	0.080401	0.0756931	0	0	0	0	1	0	0	0	0	0	0	0	1	0	0	0	0	0	0	0	0
chr1	34529404	34529802	0.544296	0.0674979	0.109446	0.0317925	0.0455646	0.0250723	0.981618	1.64801	0.0892606	0.493139	0.0704203	1.25636	0.822264	0.0690443	0.258548	0.127832	0.427342	0.41069	0.0222446	0.402722	0.0554189	0.308753	1.94528	0.0730587	0.061691	0.0326742	1	0	0	0	0	0	0	0	0	0	0	0	0	0	1	0	0	0	1	0	0
chr1	34546698	34547699	0.410166	0.0536746	1.37709	0.477467	0.0483762	0.0352421	0.498237	0.158568	0.0351329	0.0255237	0.0278665	0.434282	0.143205	0.0303846	0.0270516	0.0153959	0.164776	0.0280693	0.0243428	0.0431626	0.0283233	0.280254	0.0681176	0.0847105	0.0443048	0.0321583	1	0	1	1	0	0	0	0	1	0	0	0	0	0	0	0	0	1	0	0	0
chr1	34567499	34567897	0.966866	0.0449987	0.10319	0.0109366	0.0566189	0.0372272	1.09889	0.143964	0.0259681	0.160274	0.0730524	1.2912	0.28032	0.0686536	0.140587	0.0350171	0.27062	0.106861	0.0264829	0.0743719	0.0364547	0.489631	1.05237	0.0143894	0.0828482	0.020293	1	0	0	0	0	0	0	0	1	0	0	0	0	0	0	0	0	0	1	0	0
chr1	34574103	34574746	0.114457	0.125338	0.333229	0.1176	0.0711949	0.0298353	0.605262	0.157398	0.0358391	0.659582	0.0283293	0.719071	0.12379	0.0315706	0.322328	0.0866988	0.134788	0.0361407	0.01635	0.334904	0.0391669	0.386551	0.10569	0.039332	0.370859	0.0336531	0	0	1	0	0	0	0	0	0	0	0	0	0	0.227061	0.772939	0	0	0.377916	0	0	0
chr1	34899723	34900121	0.682147	0.0568732	0.0776156	0.0409486	0.0256412	0.0112084	0.123994	2.64705	0.0211496	0.00675727	0.033511	0.102063	1.58571	0.029473	0.0152283	0.013105	0.128141	2.18155	0.0238579	0.0290734	0.0235993	0.0392079	1.6929	0.016902	0.0133526	0.014144	1	0	0	0	0	0	0	0	0	0.30402	0.69598	0	0	0	0	0	0	0	0.30402	0.69598	0
chr1	35746974	35747944	0.0947076	0.0369268	1.01031	0.097053	0.0473963	0.0314019	0.672264	0.166781	0.0308107	0.151596	0.0493496	0.251971	0.13979	0.0270351	0.186846	0.0562291	0.0627915	0.0363159	0.0194156	0.064912	0.0519622	0.0755228	0.0493036	0.0274811	0.0882502	0.0997633	0	0	1	0	0	0	0	0	1	0	0	0	0	0	0	0	0	0.618557	0	0	0
chr1	35991905	35992303	0.905742	0	0.143407	0.0676541	0.0484459	0.0654662	0.131958	0.0848416	0.0235849	0.237419	0.0343556	0.204799	0.132774	0.0369423	0.179678	0.0425117	0.130462	0.0368375	0.031528	0.0747951	0.0348555	0.456565	0.149878	0.0592736	0.0462173	0.0235549	1	0	0	0	0	0	0	0	0	0	0	0	1	0	0	0	0	0	0	0	0
chr1	36030121	36030519	0.548037	0.0774976	0.140726	0.076556	0.0795246	0.0321676	0.175762	0.172066	0.0433801	0.361936	0.0566701	0.213286	0.251078	0.0635977	0.32788	0.0645932	0.200923	0.053177	0.0326901	0.145436	0.0421265	0.628009	0.131004	0.142877	0.0864789	0.0424321	1	0	0	0	0	0	0	0	0	0	0	0	0	1	0	0	0	0	0	0	0
chr1	36110909	36112076	0.154934	0.0306931	0.167521	0.333043	0.177187	0.0444794	0.638513	0.107502	0.0370064	0.090669	0.0412869	0.80871	0.158865	0.0478211	0.0874601	0.0244264	0.831899	0.0792703	0.0849334	0.031648	0.0262586	0.286113	0.0607045	0.0596151	0.0838331	0.0327675	0	0	0	1	1	0	0	0	1	0	0	0	0	0	0	0	0	1	0	0	0
chr1	36118254	36120012	0.115752	0.0916866	0.170861	0.103041	0.123448	0.0331508	0.850526	0.1429	0.0655624	0.521154	0.0557527	0.821227	0.196952	0.0626135	0.324323	0.055436	1.18152	0.102612	0.0932921	0.112442	0.0413871	0.19942	0.0576853	0.0657344	0.306277	0.0515952	0	0	0	0	1	0	0	0	0	0	0	0	0	0.120592	0.879408	0	0	0	0	0	0
chr1	36129295	36129793	0.102644	0	0.309217	0.363645	0.0860284	0.0276297	0.608932	0.222665	0.598578	0.0397153	0.0381948	0.962023	0.264738	0.491384	0.0609619	0.0247538	0.721323	0.977656	0.93273	0.0664178	0.0272374	0.307466	0.128544	0.176351	0.104377	0.0174494	0	0	0	1	0	0	0	1	0	0	0	0	0	0	0	0	1	0	0	0	0
chr1	36147400	36148955	0.150567	0.155484	0.440423	0.677017	0.319727	0.0330424	1.27336	0.288115	1.0732	0.0716488	0.0774955	1.79364	0.294527	0.77066	0.0662553	0.123552	1.4639	0.561161	0.797759	0.0582113	0.0776756	0.194584	0.100076	0.455662	0.100651	0.168768	0	0	1	1	1	0	0	1	0	0	0	0	0	0	0	0	1	0	0	0	0
chr1	36156502	36157923	0.353728	0.0756204	0.471498	0.0728036	0.0561848	0.0262054	1.28059	0.361986	0.420464	0.0358807	0.035475	1.3643	0.199339	0.620995	0.0545684	0.0582593	0.954726	0.0577472	1.1507	0.0578779	0.0661574	0.142453	0.0596428	0.30103	0.0938767	0.052184	1	0	1	0	0	0	0	0.086559	0.422238	0.491203	0	0	0	0	0	0	1	0	0	0	0
chr1	36185826	36186224	0.701485	0.0224993	0.1564	0.207414	0.0705439	0.0336838	1.8835	0.214552	0.135402	0.0633495	0.0458272	1.38855	0.154316	0.118135	0.0638176	0.0407544	1.05333	0.0398629	0.114122	0.199851	0.0595041	0.694742	0.204235	0.0663039	0.0851189	0.0480675	1	0	0	0	0	0	0	0	1	0	0	0	0	0	0	0	0	1	0	0	0
chr1	36186737	36187977	1.17433	0.628276	1.48976	0.244333	0.153293	0.0502553	1.65655	0.354305	0.100838	0.0781694	0.0639494	2.05133	0.328604	0.173826	0.055964	0.0565705	1.62707	0.188917	0.226947	0.117832	0.05692	0.814499	0.197592	0.19036	0.103713	0.109338	1	1	1	1	1	0	0	0	0.304032	0.695968	0	0	0	0	0	0	0	0.516129	0.483871	0	0
chr1	36190426	36190824	0.44449	0	0.086484	0.0675271	0.0462259	0.0324776	0.557655	0.115627	0.202041	0.0855922	0.0422521	0.505633	0.147093	0.184442	0.0423685	0.0291738	0.295158	0.0490322	0.177396	0.032641	0.0245113	0.160619	0.0665559	0.0811049	0.137496	0.0393229	1	0	0	0	0	0	0	0	1	0	0	0	0	0	0	0	0	1	0	0	0
chr1	36217811	36218826	0.335843	0.0882239	1.11422	0.160966	0.0635796	0.0351668	1.04016	0.260226	0.56426	0.0263861	0.0156204	1.20464	0.210177	0.990256	0.0718557	0.0222898	0.438285	0.0417296	0.754728	0.0635345	0.0422419	0.432895	0.0821741	0.64741	0.0584575	0.0303976	1	0	1	0	0	0	0	1	0	0	0	0	0	0	0	0	1	0	0	0	0
chr1	36320484	36321706	0.74417	0.205182	0.695366	0.144758	0.054303	0.0689973	0.753224	0.381115	0.0630978	0.0403941	0.0309774	0.816121	0.306675	0.10001	0.0387452	0.0372073	0.279038	0.055618	0.0284811	0.120614	0.0265619	0.442647	0.545947	0.0969153	0.0571728	0.0220251	1	1	1	1	0	1	0	0	0.258592	0.741408	0	0	0	0	0	0	0	0.258592	0.741408	0	0
chr1	36329810	36330908	1.15961	0.391237	0.818076	0.391817	0.0666331	0.0614854	0.841692	1.94844	0.0687838	0.0435782	0.0425073	0.914741	0.659246	0.0712154	0.0504333	0.028348	0.509253	0.114262	0.028615	0.154722	0.0323693	0.406487	1.33323	0.0573691	0.0890966	0.0217352	1	1	1	1	0	1	0	0	0.098361	0.901639	0	0	0	0	0	0	0	0.098361	0.901639	0	0
chr1	36332437	36333610	0.272274	0.0916083	1.12252	0.146663	0.0759267	0.0354949	1.08118	0.30892	0.0978803	0.0858824	0.402306	1.24169	0.203136	0.135332	0.0672241	0.0836578	0.472549	0.0511762	0.0536219	0.0870795	0.0658342	0.327697	0.0748339	0.0974557	0.169314	0.0311964	0	0	1	0	0	0	0	0	0.690537	0.309463	0	0	0	0	0	0	0	1	0	0	0
chr1	36364432	36364830	2.13399	0.468735	0.109789	0.0441279	0.0330072	0.0187644	0.252639	2.23946	0.0266453	0.0255509	0.0197805	0.240096	1.42855	0.0390322	0.0261393	0.0301053	0.330143	1.50489	0.0272623	0.252694	0.0486728	0.314025	1.32088	0.0233553	0.209086	0.0219447	1	0	0	0	0	0	0	0	0	0	1	0	0	0	0	0	0	0	0	1	0
chr1	36514713	36515441	0.192458	0	0.101027	0.0400459	0.070734	0.101496	0.269357	0.131767	0.0390877	0.444615	0.0567337	0.438709	0.130977	0.0569706	0.306451	0.0795504	0.129599	0.0462385	0.0231264	0.153767	0.0418814	0.586957	0.454227	0.0541437	0.0397406	0.0307558	0	0	0	0	0	1	0	0	0	0	0	0	0	1	0	0	0	0.119505	0	0	0
chr1	36613499	36613897	0.433143	0.178119	0.0871029	0.0507406	0.0492977	0.0258179	0.515067	0.228183	0.0374806	3.03106	0.078395	0.191811	0.171882	0.0460836	0.864034	0.177774	0.26793	0.505302	0.0692629	2.01514	0.127928	0.415671	1.60403	0.0497587	0.639239	0.0655288	1	0	0	0	0	0	0	0	0	0	0	0	0	0	1	0	0	0	0	0	0
chr1	36810812	36811210	0.789302	0	0.159288	0.0668914	0.0646131	0.0394137	0.129405	0.0917758	0.0435103	0.317239	0.0520344	0.246739	0.149308	0.0342998	0.32003	0.0846209	0.127854	0.0422751	0.0271255	0.136551	0.0394905	0.398034	0.0911599	0.0466144	0.367467	0.0678331	1	0	0	0	0	0	0	0	0	0	0	0	0	1	0	0	0	0	0	0	0
chr1	36892214	36893085	0.234101	0.0719668	0.432912	0.491434	0.0534753	0.0439817	0.392846	0.121513	1.00675	0.0435497	0.0263081	0.976994	0.165188	1.08544	0.0663212	0.0209541	0.120582	0.0363572	1.0883	0.0561816	0.0334069	0.32344	0.059502	0.25933	0.0536265	0.0147464	0	0	1	1	0	0	0.213548	0.786452	0	0	0	0	0	0	0	0	1	0	0	0	0
chr1	36975697	36978109	0.731637	1.58527	2.42771	1.4973	0.380879	0.070771	0.964552	0.317545	0.1473	0.0111501	0.024478	1.14196	0.231073	0.436036	0.0410208	0.0432519	1.21166	0.497295	0.218879	0.0320839	0.0259331	0.67861	0.132239	0.103872	0.0509582	0.0115457	1	1	1	1	1	1	0	0.042703	0.331675	0.625622	0	0	0	0	0	0	0.585406	0.414594	0	0	0
chr1	36978630	36980051	0.128323	0.118682	0.241516	0.22297	0.0966467	0.0281739	1.22607	0.420762	0.467981	0.0402179	0.0267383	1.26202	0.260781	0.757969	0.047533	0.0271344	1.45367	0.343605	0.482932	0.0507799	0.0281993	0.556754	0.079424	0.158264	0.068315	0.0209661	0	0	1	1	0	0	0	0.458128	0.140746	0.401126	0	0	0	0	0	0	1	0	0	0	0
chr1	36990467	36991887	0.0910422	0.0320562	0.775888	0.681289	0.180335	0.0388886	1.23533	0.402598	0.501465	0.0273437	0.0369589	1.05219	0.437126	0.58933	0.0431497	0.0328441	1.41457	0.554934	0.418445	0.0631635	0.0401805	0.532113	0.110297	0.144244	0.0615682	0.0278669	0	0	1	1	1	0	0	0.516197	0.140845	0.342958	0	0	0	0	0	0	0.093662	0	0.906338	0	0
chr1	36993299	36994001	0.0241257	0	0.267885	0.124659	0.0486846	0.0244544	0.468394	0.387474	0.102121	0.00131692	0.0145222	0.323107	0.506904	0.412737	0.0492433	0.0172603	0.838823	0.745786	0.327103	0.0412507	0.0335094	0.224232	0.0573632	0.102739	0.0485129	0.018745	0	0	1	0	0	0	0	0	0.143875	0.854701	0.001425	0	0	0	0	0	0	0.143875	0.569801	0.286325	0
chr1	36996207	36996605	0.547262	0.181869	0.0556854	0	0.0302604	0.0148189	0.0769073	3.59592	0.0289114	0	0.0144769	0.0481461	2.53711	0.0638671	0.0228033	0.0122369	0.0770567	2.48845	0.0620442	0.0575591	0.054782	0.0271512	2.09101	0.0235337	0.0137741	0.0138942	1	0	0	0	0	0	0	0	0	0	1	0	0	0	0	0	0	0	0	1	0
chr1	37000179	37001156	0.210436	0.128317	0.454055	0.158472	0.0951095	0.0399471	1.46883	0.561789	0.0698007	0.112832	0.0358088	1.53187	0.432542	0.111172	0.0609723	0.0372578	1.31945	0.509177	0.105767	0.0908844	0.0367904	0.281943	0.0810522	0.055698	0.170799	0.041967	0	0	1	0	0	0	0	0	0.181167	0.818833	0	0	0	0	0	0	0	0.181167	0.818833	0	0
chr1	37001256	37001862	0.0602146	0.132991	0.25727	0.131462	0.0833546	0.031932	1.33594	0.169743	0.0912623	0.185792	0.0644785	1.32281	0.183592	0.113724	0.121977	0.0457457	0.995557	0.0403693	0.136325	0.112888	0.0332302	0.131696	0.0397017	0.0713204	0.211745	0.0514057	0	0	1	0	0	0	0	0	1	0	0	0	0	0	0	0	0	1	0	0	0
chr1	37186991	37187424	0.069101	0	0.123221	0.054237	0.103858	0.066057	0.110898	0.063125	0.0274962	0.309454	0.0251871	0.184564	0.147001	0.0536608	0.303794	0.0476182	0.113629	0.0373144	0.0436829	0.0851205	0.0469663	0.0800354	0.0366456	0.0303143	0.0907498	0.0510588	0	0	0	0	0	1	0	0	0	0	0	0	1	0	0	0	0	0	0	0	0
chr1	37484727	37485361	0.0844304	0.0423725	0.0968438	0.106177	0.0609161	0.141481	0.826914	0.210238	0.818776	0.0193097	0.0434672	0.792586	0.166416	0.641568	0.051593	0.0465563	0.363009	0.0676601	0.313196	0.0612834	0.0279981	0.414938	0.58868	0.162613	0.0225432	0.0121728	0	0	0	0	0	1	0	0.746057	0.253943	0	0	0	0	0	0	0	1	0	0	0	0
chr1	37486768	37487166	1.13605	0.344364	0.0873089	0	0.0595564	0.0409804	0.147249	3.50918	0.0931806	0.0145704	0.0766078	0.235516	2.89549	0.102765	0.0544373	0.0374517	0.21167	2.51597	0.0773708	0.0702439	0.0638767	0.104831	2.05344	0.0419186	0.0477402	0.037102	1	1	0	0	0	0	0	0	0	0.080402	0.919598	0	0	0	0	0	0	0	0.080402	0.919598	0
chr1	37487586	37488190	0.127625	0.0593029	0.15683	0.282145	0.10241	0.0312759	0.616862	1.18948	0.243328	0.0222632	0.0239197	0.501178	0.64185	0.347178	0.0455047	0.0131135	0.689877	2.01867	0.217598	0.0491416	0.0350855	0.477555	1.22205	0.19623	0.0234478	0.0116889	0	0	0	1	0	0	0	0	0	0.645695	0.354305	0	0	0	0	0	0	0	0.645695	0.354305	0
chr1	37492987	37494302	0.117358	0.129384	0.154098	0.101689	0.163634	0.0348641	0.49797	0.169014	1.62991	0.0705582	0.0330434	0.597698	0.161016	1.57534	0.110171	0.0272263	1.07274	0.204644	1.31665	0.0731049	0.0392485	0.207919	0.0715746	1.03557	0.0753199	0.0235636	0	0	0	0	1	0	0.077567	0.922433	0	0	0	0	0	0	0	0.077567	0.922433	0	0	0	0
chr1	37534896	37536018	0.456089	0.103753	0.74883	0.314598	0.109294	0.0638312	0.561835	0.568217	0.0562855	0.00134829	0.015601	0.467762	0.525337	0.0425556	0.0341096	0.0214258	0.780671	1.19062	0.0372613	0.0503869	0.0233012	0.431029	0.508489	0.0482128	0.0527861	0.0168143	1	0	1	1	0	1	0	0	0	1	0	0	0	0	0	0	0	0	0.907308	0.092692	0
chr1	37536404	37537207	0.13786	0.133819	0.56263	0.217204	0.0850052	0.0350594	1.00404	0.34242	0.206295	0.0280495	0.0555628	1.13184	0.270456	0.184832	0.0428065	0.0447434	1.25315	0.244715	0.0833983	0.0656611	0.0411834	0.487604	0.107796	0.227624	0.128486	0.0856447	0	0	1	1	0	0	0	0.257783	0	0.742217	0	0	0	0	0	0	0.257783	0.498132	0.244085	0	0
chr1	37720940	37721648	0.0881461	0.0252958	0.292395	0.0879304	0.0317589	0.0218785	0.200121	0.131784	0.0262455	0.186328	0.0143881	0.262693	0.154894	0.0143853	0.20125	0.0400478	0.0689404	0.0243417	0.0144877	0.0695769	0.0322001	0.0677167	0.0367469	0.0349646	0.127764	0.0139123	0	0	1	0	0	0	0	0	1	0	0	0	0	0	0	0	0	0	0	0	0
chr1	37801683	37801712	0.230064	1.03785	0.183039	0.0506136	0.102786	0.0979518	0.180642	0.0768985	0.0103664	0.21832	0.0304629	0.306978	0.130207	0.0214643	0.270941	0.0528811	0.243816	0.0307288	0.0208279	0.110867	0.0269186	0.383829	0.117378	0.0258158	0.0669934	0.0441949	0	1	0	0	0	0	0	0	0	0	0	0	1	0	0	0	0	0	0	0	0
chr1	37853669	37854451	0.134146	0	0.381205	0.086988	0.0604404	0.0239522	0.571491	0.169421	0.0233443	0.474134	0.0313917	0.714019	0.18819	0.027448	0.330953	0.0594462	0.213854	0.0479904	0.018767	0.101047	0.0485968	0.224558	0.0646398	0.0736331	0.0742625	0.0247748	0	0	1	0	0	0	0	0	0.488491	0	0	0	0	0	0.511509	0	0	0.320972	0	0	0
chr1	37925340	37926175	0.500989	0.0107242	0.120325	0.086619	0.0724649	0.0840058	0.495762	0.118801	0.0953773	0.249178	0.053087	0.781504	0.218348	0.0774899	0.225024	0.0886908	0.387433	0.0864964	0.052975	0.178007	0.0519911	0.569563	0.666692	0.0668	0.0476491	0.0198017	1	0	0	0	0	1	0	0	1	0	0	0	0	0	0	0	0	1	0	0	0
chr1	37947207	37947605	0.676599	0.179994	0.0559604	0.0157691	0.0460577	0.0250723	0.079248	2.89181	0.0583956	0.0221723	0.0342967	0.0619475	1.94531	0.089255	0.0163273	0.0256595	0.113066	2.37206	0.0359167	0.050178	0.0351429	0.078215	1.93469	0.0336667	0.0263652	0.0277467	1	0	0	0	0	0	0	0	0	0	1	0	0	0	0	0	0	0	0	1	0
chr1	38052968	38053444	0.139734	0	0.0887522	0.315378	0.118278	0.0306157	0.5852	1.24558	0.194479	0.0214817	0.025359	0.491983	0.841318	0.41179	0.0352288	0.0119842	0.709627	1.69748	0.192053	0.0468356	0.0425459	0.398175	1.10396	0.114999	0.0238639	0.00854187	0	0	0	1	0	0	0	0.067227	0	0.840336	0.092437	0	0	0	0	0	0.067227	0	0.840336	0.092437	0
chr1	38054765	38055163	0.703682	0.112496	0.0549978	0.00775734	0.0586707	0.0236985	0.117884	3.12604	0.0484721	0.0392063	0.0139466	0.0844935	1.64712	0.0812328	0.0292596	0.0186094	0.130408	2.51316	0.0746092	0.0363179	0.0396279	0.0683664	2.16102	0.0414381	0.0207087	0.0119232	1	0	0	0	0	0	0	0	0	0	1	0	0	0	0	0	0	0	0	1	0
chr1	38056110	38057094	0.13519	0.027301	0.623113	0.288199	0.154111	0.0249036	0.379418	0.461122	0.120362	0.00025623	0.0128233	0.217275	0.394358	0.243022	0.0297097	0.0203203	0.50468	1.33348	0.186692	0.0399221	0.0137545	0.269383	0.591674	0.119456	0.0309415	0.00622054	0	0	1	1	1	0	0	0	0.203252	0.705285	0.091463	0	0	0	0	0	0	0.203252	0.502033	0.294715	0
chr1	38057488	38058284	0.240298	0.112496	0.373434	0.184015	0.0405471	0.0227854	0.542562	0.304116	0.252558	0.0253398	0.0522406	0.497454	0.282107	0.441791	0.0357061	0.151596	0.668127	0.352382	0.2701	0.0493236	0.0285091	0.313476	0.15006	0.20647	0.0449323	0.0188217	0	0	1	0	0	0	0	0	0	1	0	0	0	0	0	0	0.356784	0	0.502513	0.140704	0
chr1	38068172	38069076	0.116383	0.089151	1.20384	1.5609	0.229673	0.0679054	0.468026	0.190762	0.0593949	0.0223124	0.0274752	0.526155	0.197504	0.0612763	0.0207269	0.0185673	0.697355	0.330192	0.0689582	0.0429977	0.0291678	0.306042	0.31729	0.0474168	0.0233471	0.00934987	0	0	1	1	1	1	0	0	0.473451	0.526549	0	0	0	0	0	0	0	0.69469	0.30531	0	0
chr1	38071156	38071997	0.199979	0.0106477	0.278233	0.283942	0.139052	0.0281471	0.76734	0.110182	0.342246	0.0144236	0.0783747	0.823768	0.147024	0.516292	0.0524254	0.122485	1.07066	0.130024	0.282273	0.0450414	0.0422728	0.371911	0.0579037	0.293909	0.0288604	0.0668635	0	0	1	1	1	0	0	0.765755	0.234245	0	0	0	0	0	0	0	1	0	0	0	0
chr1	38128705	38129179	0.168042	0.0188918	0.0641319	0.0529625	0.0957128	0.0654852	0.12586	0.036845	0.600858	0.0296693	0.0268184	0.419816	0.0915592	0.612151	0.0639003	0.0361043	0.214067	0.0278536	0.505602	0.0540229	0.0165321	0.0729552	0.0240973	0.306275	0.0352448	0.0126804	0	0	0	0	0	1	1	0	0	0	0	0	0	0	0	0	1	0	0	0	0
chr1	38150795	38152108	0.0355697	0	0.303061	0.171037	0.128783	0.0424993	0.411025	0.11772	1.064	0.140862	0.148136	0.282928	0.154908	1.15391	0.121035	0.213624	0.507005	0.12819	0.838755	0.0933281	0.193004	0.151639	0.0745846	0.723265	0.0905897	0.204729	0	0	1	0	1	0	0.156131	0.843869	0	0	0	0	0	0	0	0.543031	0.456969	0	0	0	0
chr1	38186230	38186628	0.557835	0.134996	0.0544479	0.00991925	0.0133307	0.0109655	0.0919544	3.42986	0.0177766	0	0.0309181	0.147948	2.71452	0.0703659	0.000176617	0.00666891	0.104531	2.24877	0.0387059	0.0195463	0.0122806	0.039422	2.01736	0.0301106	0.0107011	0.0155876	1	0	0	0	0	0	0	0	0	0	1	0	0	0	0	0	0	0	0	1	0
chr1	38187927	38188325	0.532564	0	0.0986524	0.0832963	0.06912	0.0293865	0.549174	0.78369	0.0307606	0.0822839	0.0303485	0.666768	0.637698	0.073453	0.0581659	0.0233094	0.969046	1.12181	0.089785	0.0643386	0.0356051	0.371124	0.128133	0.0745418	0.0722834	0.0203763	1	0	0	0	0	0	0	0	0	0.816583	0.183417	0	0	0	0	0	0	0	0.816583	0.183417	0
chr1	38485683	38486081	1.65688	0.0899972	0.120445	0.141921	0.0835835	0.0418765	0.242122	0.165948	0.058096	0.273388	0.0702238	0.664072	0.204798	0.0945535	0.471489	0.100267	0.174897	0.0397296	0.0342077	0.184501	0.067125	0.393217	0.15562	0.068075	0.138271	0.0541054	1	0	0	0	0	0	0	0	0	0	0	0	1	0	0	0	0	0.203518	0	0	0
chr1	38502625	38503722	0.126504	0.0571403	0.119547	0.040417	0.187427	0.0265143	0.07955	0.0957318	0.045978	0.1699	0.0356118	0.454213	0.143355	0.0949705	0.17163	0.0504492	1.07808	0.0849911	0.0987358	0.0776501	0.0370764	0.0956321	0.0196551	0.0626617	0.099552	0.026106	0	0	0	0	1	0	0	0	0	0	0	0	1	0	0	0	0	1	0	0	0
chr1	38504016	38505278	0.151933	0.134818	0.0930332	0.0780861	0.313773	0.0316021	0.230178	0.101103	0.0795265	0.284185	0.0438287	1.24195	0.146732	0.136521	0.108541	0.0905437	1.21536	0.51347	0.0880084	0.0716616	0.0371026	0.33969	0.0751955	0.0759681	0.117154	0.0380752	0	0	0	0	1	0	0	0	0	0	0	0	0.366086	0.316957	0.316957	0	0	1	0	0	0
chr1	38555993	38556948	0.409448	0.08439	0.407154	0.0800808	0.0904366	0.0379384	0.490235	0.109573	0.0423666	0.329311	0.0661372	1.00844	0.147492	0.0545821	0.325632	0.103725	0.853997	0.0761831	0.0308372	0.221178	0.042808	0.297021	0.0615029	0.0643459	0.155626	0.0603514	1	0	1	0	0	0	0	0	1	0	0	0	0	0	0	0	0	0	0	0	0
chr1	38721660	38722058	0.633145	0.134996	0.162725	0.163795	0.0796366	0.0400922	0.511267	0.332947	0.0396945	0.240728	0.051229	0.956199	0.343537	0.086828	0.0853255	0.0196468	0.130694	0.0290408	0.0233383	0.0945603	0.0393281	0.486392	0.683099	0.0410399	0.10334	0.029218	1	0	0	0	0	0	0	0	0.145729	0.502513	0.351759	0	0	0	0	0	0	0.145729	0.854271	0	0
chr1	38724935	38725813	0.323539	0.152985	0.403939	0.142617	0.0745827	0.0355655	0.641426	0.232875	0.0543589	0.572925	0.0704948	1.49313	0.272735	0.0900986	0.163102	0.0513628	0.175362	0.0484161	0.0279327	0.104807	0.0623169	0.224232	0.0626355	0.0934654	0.147917	0.0571561	0	0	1	0	0	0	0	0	0.074032	0	0	0	0	0	0.925968	0	0	1	0	0	0
chr1	38750745	38751787	3.08203	0.266408	0.522912	0.126048	0.0571187	0.0595646	0.428137	0.174009	0.0365163	0.0964108	0.0369964	1.33274	0.191783	0.0464408	0.128459	0.0364054	0.100466	0.0394367	0.0223196	0.124742	0.0483527	0.56641	0.163371	0.0426789	0.293968	0.0504668	1	1	1	0	0	0	0	0	1	0	0	0	0	0	0	0	0	1	0	0	0
chr1	38782426	38783280	0.467728	0.0524281	0.459313	0.0811356	0.0629785	0.0285189	0.568869	0.134427	0.0174979	0.212602	0.0446189	0.930178	0.138664	0.0422249	0.232327	0.077315	0.143602	0.0271244	0.0203452	0.089909	0.0400864	0.0986221	0.050953	0.0387326	0.136991	0.0621198	1	0	1	0	0	0	0	0	1	0	0	0	0	0	0	0	0	1	0	0	0
chr1	38823780	38824517	0.20118	0.133652	0.555916	0.137144	0.0962625	0.0308116	0.54164	0.158144	0.0254027	0.328647	0.0468439	1.14785	0.199408	0.0392299	0.155222	0.0283081	0.755578	0.144802	0.0262256	0.161898	0.0324038	0.306696	0.0550383	0.0593697	0.211461	0.0617275	0	0	1	0	0	0	0	0	0.430122	0	0	0	0	0	0.569878	0	0	0.972863	0	0	0
chr1	38834221	38834619	0.491428	0.0899972	0.130757	0.142685	0.0630321	0.0342033	0.244644	0.0941801	0.0632663	0.234393	0.0647434	0.455683	0.1822	0.0542269	0.317381	0.0775075	0.105064	0.0267485	0.0211508	0.114694	0.0464616	0.557543	0.279174	0.0405456	0.114013	0.0352004	1	0	0	0	0	0	0	0	1	0	0	0	0	0	0	0	0	0	0	0	0
chr1	38907260	38908062	0.0940692	0	0.423284	0.141301	0.0532357	0.0275204	1.22052	0.143324	0.0300523	0.0761841	0.0280451	1.03121	0.185046	0.0688559	0.0444083	0.0374972	0.10812	0.0399813	0.0218339	0.125578	0.0320405	0.136307	0.0540161	0.0174093	0.215079	0.040613	0	0	1	0	0	0	0	0	1	0	0	0	0	0	0	0	0	1	0	0	0
chr1	38908717	38909818	0.0906178	0.00813325	1.07192	0.106008	0.0562789	0.0338582	1.28356	0.306864	0.0439796	0.0510164	0.0325356	1.30459	0.188647	0.0956632	0.0654272	0.0301993	0.129028	0.0337149	0.0202488	0.11828	0.0321366	0.0825289	0.0372363	0.034004	0.238583	0.0412445	0	0	1	0	0	0	0	0	0.561308	0.438692	0	0	0	0	0	0	0	1	0	0	0
chr1	38937948	38938945	0.0541016	0.0359266	0.973374	0.308504	0.0627715	0.0282273	0.688096	0.14515	0.114332	0.0574059	0.0500127	0.760133	0.153534	0.295947	0.0666273	0.0390458	0.0817779	0.0345769	0.0369936	0.0551763	0.0605692	0.0749199	0.0471897	0.0381649	0.0996202	0.0561468	0	0	1	1	0	0	0	0	1	0	0	0	0	0	0	0	0.653962	0.346038	0	0	0
chr1	38943472	38944369	0.138175	0.0798637	0.342674	0.0600368	0.0373745	0.0270031	1.29663	0.372462	0.325988	0.0571532	0.0396387	1.53344	0.171198	0.510944	0.0509287	0.0281058	0.0973356	0.0297448	0.0229187	0.0797468	0.0409031	0.0809509	0.054262	0.0269639	0.106829	0.0601641	0	0	1	0	0	0	0	0	0.142698	0.857302	0	0	0	0	0	0	1	0	0	0	0
chr1	38947968	38948979	0.206405	0.0177146	1.1042	0.71565	0.0668634	0.0409087	1.1793	0.224636	0.61094	0.0751209	0.0439536	1.22918	0.165773	0.769898	0.0482452	0.0323376	0.0965633	0.0448433	0.0306146	0.0783737	0.0550291	0.0739405	0.060476	0.0792622	0.20518	0.0674287	0	0	1	1	0	0	0	1	0	0	0	0	0	0	0	0	1	0	0	0	0
chr1	39040784	39041182	0.611092	0.0449987	0.160937	0.0630761	0.0468426	0.0587311	0.18856	0.0980447	0.0251868	0.153376	0.0557273	0.375929	0.109169	0.0292438	0.1629	0.0478468	0.133672	0.0290808	0.0284244	0.0831469	0.0122931	0.287583	0.0530485	0.0242065	0.0563063	0.00571871	1	0	0	0	0	0	0	0	0	0	0	0	1	0	0	0	0	0	0	0	0
chr1	39146599	39146997	0.643717	0.0224993	0.0985838	0.0559548	0.0764189	0.0907312	0.207802	0.106975	0.0425466	0.177449	0.0705774	0.388758	0.212248	0.0359851	0.208271	0.0669644	0.148774	0.0308934	0.0301881	0.0961461	0.0808548	0.410559	0.257841	0.0159821	0.0374606	0.0386427	1	0	0	0	0	0	0	0	0	0	0	0	1	0	0	0	0	0.505025	0	0	0
chr1	39242801	39243742	0.159911	0.114194	0.161493	0.251401	0.0810083	0.0401465	0.124277	0.154369	0.0313251	0.115303	0.0503721	0.192952	0.311228	0.0418565	0.266832	0.114733	0.111728	0.050806	0.0378362	0.114394	0.0872277	0.590211	0.172078	0.103149	0.17505	0.0666094	0	0	0	1	0	0	0	0	0	0	0	0	1	0	0	0	0	0	0	0	0
chr1	39424591	39424989	0.811612	0.163745	0.0562354	0.0475615	0.04793	0.0301153	0.0997668	2.72152	0.0783473	0.0746819	0.0509933	0.104899	2.18562	0.0968861	0.0256879	0.0743742	0.265964	2.18064	0.0739252	0.108297	0.0866266	0.0419779	1.95963	0.0519143	0.0324296	0.0933451	1	0	0	0	0	0	0	0	0	0	1	0	0	0	0	0	0	0	0	1	0
chr1	39449991	39450982	1.31309	0.38855	1.27378	0.621256	0.0712252	0.0448665	0.937015	0.319915	0.221063	0.0286081	0.022657	1.14641	0.221635	0.289194	0.0441749	0.048431	0.789355	0.0794692	0.231657	0.0669395	0.0376003	0.70869	0.163352	0.419913	0.0781887	0.0504774	1	1	1	1	0	0	0	0	0.210898	0.789102	0	0	0	0	0	0	1	0	0	0	0
chr1	39452952	39453834	2.88561	0.203055	0.435424	0.497758	0.0817223	0.163542	1.0353	0.175962	0.775512	0.0868069	0.186061	1.09729	0.219738	0.505196	0.0562579	0.14246	0.386308	0.0470178	0.307655	0.0739296	0.0896467	0.603073	0.205952	0.299999	0.0687755	0.172107	1	1	1	1	0	1	0	1	0	0	0	0	0	0	0	0	1	0	0	0	0
chr1	39486560	39487977	0.141905	0.063195	0.304877	0.128123	0.0717424	0.0304558	1.25092	0.311435	0.15468	0.0206006	0.028502	0.80987	0.238057	0.129646	0.0825411	0.0408997	0.789339	0.111471	0.0846025	0.0521365	0.0355565	0.3082	0.0580112	0.15158	0.114146	0.0796452	0	0	1	0	0	0	0	0	0.435427	0.564573	0	0	0	0	0	0	0	1	0	0	0
chr1	39539275	39540130	0.181998	0.0520759	0.361844	0.131654	0.0619183	0.0309695	0.966986	0.230985	0.0444786	0.0828313	0.0581727	0.486434	0.163605	0.0498826	0.258739	0.0411056	0.264481	0.0469205	0.0447541	0.109624	0.0424878	0.377768	0.127936	0.0563981	0.114146	0.0500164	0	0	1	0	0	0	0	0	0.853801	0.146199	0	0	0	0	0	0	0	0.847953	0	0	0
chr1	39544034	39545213	0.925362	0.0911421	0.139499	0.0798054	0.0806687	0.0953299	0.347284	0.144391	0.0560217	0.289625	0.0473319	0.271486	0.199741	0.0538475	0.352958	0.0449965	0.182298	0.0358305	0.045729	0.101836	0.0255064	0.649941	0.194561	0.0679165	0.0527816	0.0288822	1	0	0	0	0	1	0	0	0.689567	0	0	0	0.310433	0	0	0	0	0	0	0	0
chr1	39633959	39634357	0.938495	0.166245	0.0762407	0.0289947	0.0480648	0.0220063	0.114206	2.92682	0.0355922	0.0404028	0.0294056	0.229547	2.11553	0.0432117	0.0542018	0.0432527	0.38669	2.38139	0.0198109	0.0904873	0.0374541	0.0783758	1.99263	0.0317582	0.0162896	0.0227498	1	0	0	0	0	0	0	0	0	0	1	0	0	0	0	0	0	0	0.394472	0.605528	0
chr1	39670761	39671896	0.651631	0.0315584	0.628686	0.0540026	0.0418076	0.0235674	0.931753	0.485232	0.0441692	0.114403	0.0192176	0.833854	0.228443	0.0421627	0.120411	0.0185746	0.28474	0.070499	0.0338812	0.381631	0.0406058	0.393696	0.206543	0.0398896	0.133462	0.023801	1	0	1	0	0	0	0	0	0.034361	0.965639	0	0	0	0	0	0	0	0.739207	0.260793	0	0
chr1	39672423	39672890	0.0659386	0	0.0904041	0.0861625	0.0963924	0.0723207	0.740831	0.148199	0.0478143	0.207139	0.0311545	0.605398	0.119141	0.0539253	0.174856	0.0257836	0.200576	0.0434573	0.0234906	0.172245	0.032772	0.178764	0.0990108	0.0336656	0.0958352	0.0172592	0	0	0	0	0	1	0	0	1	0	0	0	0	0	0	0	0	1	0	0	0
chr1	39701073	39702752	0.126792	0.00533336	0.165912	0.0761764	0.11967	0.0414501	0.162094	0.126806	0.0301855	0.295962	0.0472754	0.558477	0.186581	0.0288567	0.281235	0.0515253	1.09999	0.281884	0.0920846	0.0917798	0.0339912	0.109039	0.0671132	0.0404463	0.244317	0.0492356	0	0	0	0	1	0	0	0	0	0	0	0	0.194759	0.686123	0.119119	0	0	0	0	0	0
chr1	39791026	39791947	1.82107	0.145842	0.12629	0.0452829	0.060776	0.111725	0.135815	0.135085	0.0541899	0.194885	0.0462963	0.210261	0.156841	0.0308156	0.160406	0.100546	0.417996	0.087168	0.0383683	0.210188	0.0524754	0.674706	0.845569	0.0438775	0.139994	0.0429712	1	0	0	0	0	1	0	0	0	0	0	0	1	0	0	0	0	0	0	0	0
chr1	39810941	39812092	0.266911	0.412338	0.165523	0.0852646	0.111014	0.0877019	0.140231	0.141563	0.0363185	0.255903	0.0704429	0.254716	0.240687	0.0404018	0.198103	0.0869331	0.491563	0.0809762	0.0380954	0.0879549	0.0611787	0.731352	0.202389	0.0559379	0.18958	0.062923	0	1	0	0	0	1	0	0	0	0	0	0	1	0	0	0	0	0	0	0	0
chr1	39957970	39958368	0.523793	0.0674979	0.0552728	0.00597696	0.0370098	0.0159749	0.0523456	0.165819	0.0208631	0.129092	0.468427	0.0251439	0.123941	0.0549417	0.0684294	0.353092	0.271535	1.02705	0.0128382	1.62794	0.0681369	0.075044	2.14717	0.0313463	0.104604	0.0292041	1	0	0	0	0	0	0	0	0	0	0	1	0	0	0	0	0	0	0	0	1
chr1	40108035	40108433	1.19317	0.0224993	0.0898527	0.0820243	0.0673489	0.0400755	0.192876	0.104141	0.0183626	0.229325	0.0502469	0.0509223	0.1784	0.0292168	0.175734	0.0228437	0.0745306	0.0253491	0.0372976	0.084131	0.0726969	0.365731	0.0983073	0.124328	0.0576798	0.201945	1	0	0	0	0	0	0	0	0	0	0	0	1	0	0	0	0	0	0	0	0
chr1	40142818	40142846	0.324429	0.932783	0.110423	0.101227	0.0623123	0.0285775	0.295117	0.119315	0.0368378	0.654338	0.0887889	0.431814	0.157036	0.0323881	0.3219	0.0743304	0.397128	0.255368	0.0217661	0.108415	0.0248611	0.304144	0.586674	0.021078	0.181679	0.0280164	0	1	0	0	0	0	0	0	0	0	0	0	0	1	0	0	0	0	0	0	0
chr1	40212459	40212909	0.0524624	0.00497484	0.0473656	0.0296933	0.0666563	0.0587531	0.0660039	0.0698732	0.0301893	0.146672	0.0440757	0.0471074	0.0940608	0.0237062	0.189463	0.0315886	0.0713529	0.0263097	0.0364582	0.0508352	0.0513685	0.0477315	0.0533792	0.022478	0.0729983	0.0721851	0	0	0	0	0	1	0	0	0	0	0	0	1	0	0	0	0	0	0	0	0
chr1	40270235	40270633	0.474148	0	0.18438	0.0338272	0.0678308	0.0226765	0.518441	0.126898	0.015771	0.207856	0.0401307	0.216539	0.130912	0.030282	0.148496	0.0443959	0.27245	0.0303869	0.0249654	0.118713	0.0719973	0.0850667	0.0368759	0.0290808	0.105189	0.10134	1	0	0	0	0	0	0	0	1	0	0	0	0	0	0	0	0	0	0	0	0
chr1	40286664	40287911	0.504372	0.177531	0.273175	0.0987511	0.221524	0.0324287	0.489207	0.138613	0.0196314	0.316718	0.0424312	0.328635	0.182993	0.0356218	0.224116	0.0335896	0.866497	0.294701	0.0870773	0.0639556	0.0435219	0.236909	0.112004	0.0492477	0.0729999	0.0359283	1	1	1	0	1	0	0	0	0.730553	0	0	0	0	0	0.269447	0	0	0.160385	0	0	0
chr1	40327832	40328230	0.920184	0.0162495	0.0993398	0.07503	0.0539621	0.0215624	0.317418	0.0665724	0.026437	0.312874	0.029661	0.137141	0.0834746	0.0126602	0.293263	0.0325189	0.257975	0.034785	0.0808707	0.14482	0.0354302	0.357301	0.0914507	0.0387606	0.178438	0.0553408	1	0	0	0	0	0	0	0	1	0	0	0	0	0	0	0	0	0	0	0	0
chr1	40396242	40397609	0.0670528	0.0131013	0.608576	0.0689412	0.0620995	0.0300746	0.520128	0.128296	0.0630439	0.0472989	0.124446	0.286497	0.10679	0.044385	0.147289	0.103542	0.368064	0.0308834	0.163178	0.047091	0.090857	0.069618	0.0394819	0.0374971	0.0793749	0.052637	0	0	1	0	0	0	0	0	1	0	0	0	0	0	0	0	0	1	0	0	0
chr1	40408713	40410011	0.141788	0.12418	0.660152	0.0688623	0.0684738	0.027764	0.998804	0.194267	0.038934	0.0438346	0.049624	0.603829	0.167323	0.0529662	0.134395	0.0799637	0.638958	0.050032	0.229533	0.0631026	0.0373836	0.0830184	0.0470002	0.0515943	0.0831188	0.0548733	0	0	1	0	0	0	0	0	0.778891	0.221109	0	0	0	0	0	0	0	1	0	0	0
chr1	40412922	40413734	0.2288	0.65065	0.273479	0.0567844	0.065049	0.026931	1.0609	0.188184	0.0534151	0.11399	0.0282967	0.315473	0.161599	0.0516188	0.282021	0.050951	0.321644	0.0464787	0.256623	0.0761889	0.0405493	0.162452	0.0731179	0.0352107	0.172396	0.0470319	0	1	1	0	0	0	0	0	1	0	0	0	0	0	0	0	0	0	0	0	0
chr1	40415447	40417134	0.173679	0.106161	0.564048	0.106867	0.0772605	0.0281862	1.22818	0.259504	0.0511346	0.0789788	0.0487752	0.753596	0.182757	0.0367737	0.27504	0.0486487	0.721377	0.0445511	0.147163	0.0746852	0.0337533	0.255619	0.0811766	0.0474166	0.134142	0.0448072	0	0	1	0	0	0	0	0	0.790753	0.209247	0	0	0	0	0	0	0	0.672199	0	0	0
chr1	40417633	40418536	0.140269	0.0198333	0.576377	0.0652986	0.0441334	0.0244422	0.825698	0.232077	0.0378667	0.0770012	0.025168	0.345175	0.154277	0.0302652	0.222324	0.0370731	0.42271	0.0310333	0.117833	0.0665288	0.0247841	0.0737482	0.0395491	0.0379864	0.107515	0.029139	0	0	1	0	0	0	0	0	0.593577	0.406423	0	0	0	0	0	0	0	0.627907	0	0	0
chr1	40471522	40472225	0.139511	0.0859805	0.255944	0.1666	0.0562258	0.0176661	0.824469	0.112765	0.0308928	0.0306445	0.018783	0.81852	0.130264	0.0424706	0.031486	0.0421186	0.448746	0.0303021	0.0246765	0.0728965	0.0263323	0.211526	0.0349576	0.0345214	0.0486825	0.0139563	0	0	1	0	0	0	0	0	1	0	0	0	0	0	0	0	0	1	0	0	0
chr1	40475032	40476021	0.570147	0.0271629	0.973752	0.0982075	0.0621695	0.0300502	0.936525	0.218375	0.042561	0.00679825	0.0181733	0.750586	0.115198	0.0708333	0.0259505	0.0426843	0.435169	0.0378869	0.0217496	0.0814871	0.0416933	0.151127	0.0347888	0.0521713	0.0680541	0.0325876	1	0	1	0	0	0	0	0	0.595551	0.404449	0	0	0	0	0	0	0	1	0	0	0
chr1	40485600	40486892	0.297088	0.0485162	1.83487	0.142791	0.153143	0.0295574	0.60276	0.598522	0.0383325	0.0112969	0.0260981	0.80051	0.17024	0.104447	0.04173	0.0851088	0.776236	0.640854	0.0347971	0.0603047	0.0350673	0.223509	0.0605599	0.0495626	0.046205	0.0368533	1	0	1	0	1	0	0	0	0.154799	0.535604	0.309598	0	0	0	0	0	0	1	0	0	0
chr1	40493847	40494779	0.345433	0.0192161	0.577085	0.174486	0.0626773	0.0281927	1.20822	0.254962	0.297673	0.038084	0.0409267	0.984247	0.179997	0.0770714	0.0551924	0.0177564	0.479399	0.0446718	0.116485	0.064535	0.0221082	0.254475	0.0582716	0.0473467	0.0993215	0.0485456	1	0	1	0	0	0	0	0.593348	0.406652	0	0	0	0	0	0	0	0	1	0	0	0
chr1	40557906	40558304	0.588397	0	0.122164	0.120048	0.0586934	0.0405279	0.256044	0.111527	0.0172557	0.577886	0.0649006	0.345927	0.150466	0.0331403	0.274542	0.0837531	0.132442	0.0393564	0.021643	0.0902272	0.0366795	0.625548	0.161314	0.100698	0.0520233	0.043945	1	0	0	0	0	0	0	0	0	0	0	0	0	1	0	0	0	0	0	0	0
chr1	40571957	40572355	0.927923	0	0.106146	0.113308	0.0555426	0.0366408	0.122414	0.0637815	0.0276481	0.302952	0.0197019	0.0814203	0.118656	0.0308212	0.317891	0.0287081	0.0535969	0.0331857	0.0190727	0.0746178	0.0335313	0.247438	0.48239	0.0399826	0.038562	0.0115345	1	0	0	0	0	0	0	0	0	0	0	0	1	0	0	0	0	0	0	0	0
chr1	40720514	40720872	0.204428	0.0910203	0.112273	0.281909	0.0717451	0.0364417	0.197665	0.168785	0.0429859	0.449327	0.0530003	0.18756	0.2887	0.0401107	0.253467	0.0868505	0.0817649	0.0313966	0.0237116	0.224763	0.0803054	0.11705	0.165749	0.0176457	0.255092	0.0916303	0	0	0	1	0	0	0	0	0	0	0	0	0.201117	0.798883	0	0	0	0	0	0	0
chr1	40773088	40773486	0.618831	0.0449987	0.188436	0.132257	0.0988426	0.0477908	0.187253	0.204827	0.0771884	0.33702	0.0487147	0.133869	0.21952	0.042268	0.416012	0.0698013	0.117107	0.0385834	0.0386922	0.134514	0.0875639	0.124368	0.150993	0.0304538	0.193462	0.109071	1	0	0	0	0	0	0	0	0	0	0	0	1	0	0	0	0	0	0	0	0
chr1	41506839	41507237	2.52239	0	0.128076	0.185159	0.0703199	0.0441634	0.0908601	0.0698355	0.00793109	0.0321674	0.190105	0.154591	0.148553	0.0403939	0.100671	0.143054	0.0881584	0.0129944	0.0164886	0.0445191	0.0940601	0.336064	0.112203	0.0358361	0.0471419	0.113638	1	0	0	0	0	0	0	0	0	0	0	0	1	0	0	0	0	0	0	0	0
chr1	42239757	42240253	0.139894	0	0.1127	0.0814306	0.0693988	0.0671916	0.0772253	0.0684231	0.021851	0.00920638	0.232819	0.0295479	0.13572	0.0199389	0.0690024	0.186496	0.0459438	0.0215918	0.0243003	0.0819642	0.132776	0.0466549	0.0596756	0.0298904	0.0496767	0.102279	0	0	0	0	0	1	0	0	0	0	0	1	0	0	0	0	0	0	0	0	1
chr1	42445211	42445609	0.560673	0.134996	0.0602228	0.0629491	0.0514731	0.0256001	0.080008	0.139349	0.00501391	0.0688398	0.184272	0.136348	0.108665	0.0352031	0.0992194	0.211775	0.0781491	0.0175924	0.0236118	0.0817803	0.0899625	0.0741737	0.0481059	0.0198266	0.0502692	0.144272	1	0	0	0	0	0	0	0	0	0	0	1	0	0	0	0	0	0	0	0	0.022613
chr1	42702499	42702897	0.498778	0.0224993	0.0910903	0.0199656	0.0524257	0.0396651	0.0844158	0.0585433	0.0188184	0.0337863	0.214757	0.139838	0.162193	0.0328841	0.106127	0.169983	0.0741616	0.0319329	0.0264967	0.0821491	0.10253	0.164673	0.0691845	0.0239045	0.0971254	0.109182	1	0	0	0	0	0	0	0	0	0	0	0	1	0	0	0	0	0	0	0	0
chr1	43155452	43155850	0.784658	0.123121	0.0720473	0.0164049	0.0578974	0.0243854	0.130256	3.92002	0.0865518	0.131696	0.0281681	0.134445	3.39707	0.0656738	0.0331256	0.0512341	0.123621	2.54364	0.081404	0.0864822	0.0754455	0.0698784	2.27189	0.0555805	0.0366855	0.0340761	1	0	0	0	0	0	0	0	0	0	1	0	0	0	0	0	0	0	0	1	0
chr1	43259864	43260630	0.131789	0.0935219	0.304119	0.138097	0.0615747	0.029236	0.524783	0.194477	0.0331901	0.179827	0.0287303	0.780768	0.244606	0.0347044	0.102229	0.0569037	0.175191	0.0415002	0.020395	0.0750258	0.0534743	0.112865	0.038402	0.0212166	0.105705	0.0798723	0	0	1	0	0	0	0	0	1	0	0	0	0	0	0	0	0	1	0	0	0
chr1	43337356	43338284	0.0770939	0.0278763	0.61233	0.164221	0.0451469	0.0422466	0.76429	0.122483	0.0821269	0.113115	0.267604	0.429647	0.0957127	0.0995906	0.0791139	0.152623	0.16476	0.026602	0.0532776	0.0707101	0.101732	0.271016	0.094871	0.2312	0.0480991	0.238143	0	0	1	0	0	0	0	0	1	0	0	0	0	0	0	0	0	0.909483	0	0	0
chr1	43470787	43471663	0.275768	0.337334	0.253374	0.359668	0.194821	0.0382654	1.07254	0.19844	0.0336376	0.0364892	0.0671663	1.05549	0.16301	0.0643377	0.0665935	0.0853481	0.94285	0.228355	0.123136	0.0551719	0.0610972	0.458237	0.186206	0.0526566	0.0475503	0.0238821	0	1	0	1	1	0	0	0	1	0	0	0	0	0	0	0	0	1	0	0	0
chr1	43513537	43514863	0.296824	0.0135064	0.789829	0.199935	0.0482504	0.0275549	0.603327	0.302065	0.0627495	0.0165425	0.014439	0.694022	0.16277	0.14036	0.0260346	0.0204552	0.494657	0.0347545	0.160365	0.0514189	0.0202676	0.457124	0.252197	0.274367	0.0231121	0.0143233	1	0	1	1	0	0	0	0	0.301659	0.698341	0	0	0	0	0	0	0.047511	0.952489	0	0	0
chr1	43531611	43532569	0.144752	0.0373892	0.491449	0.393813	0.108548	0.0373669	1.56757	0.364728	0.444512	0.0657083	0.0586671	1.51169	0.264105	0.355673	0.0719894	0.128169	1.20567	0.0956062	0.241983	0.0703473	0.0453469	0.793068	0.300317	0.412354	0.0606135	0.0183953	0	0	1	1	0	0	0	0.593946	0	0.406054	0	0	0	0	0	0	0.385177	0.406054	0.208768	0	0
chr1	43577530	43578378	1.29606	0.168957	0.703202	0.309292	0.0532575	0.123159	1.06719	0.215038	0.210189	0.0149323	0.0316036	1.08428	0.151834	0.165918	0.0384441	0.0151133	0.916133	0.0543201	0.171068	0.0529517	0.0319383	0.495895	0.258587	0.240683	0.0397073	0.0132311	1	1	1	1	0	1	0	0.445755	0.554245	0	0	0	0	0	0	0	0	1	0	0	0
chr1	43590224	43591803	0.28258	0.0907382	1.00042	0.504501	0.102756	0.0779752	1.44947	0.387988	0.314199	0.0457031	0.0624691	1.6304	0.304119	0.35826	0.0594115	0.0612828	0.901763	0.0886092	0.347696	0.0674041	0.035492	0.794431	0.255851	0.526203	0.0572978	0.0304382	1	0	1	1	0	1	0	0.111463	0.50665	0.381887	0	0	0	0	0	0	0.366688	0.379987	0.253325	0	0
chr1	43592039	43593014	0.162283	0.0459215	0.580793	0.0547664	0.0494784	0.0237555	0.812422	0.154656	0.104382	0.0120965	0.0218501	1.02443	0.142987	0.231407	0.0508918	0.0260129	0.688844	0.0466677	0.193031	0.0561925	0.0291704	0.582926	0.125181	0.420174	0.0428776	0.0182729	0	0	1	0	0	0	0	0	1	0	0	0	0	0	0	0	1	0	0	0	0
chr1	43604243	43605145	0.165858	0.147811	0.495964	0.173388	0.0810824	0.0270752	1.05495	0.161829	0.242261	0.0271138	0.021469	1.02735	0.156258	0.204036	0.0541273	0.0164038	0.983046	0.149869	0.165091	0.0459639	0.0356931	0.662132	0.123776	0.359977	0.038752	0.0348856	0	0	1	0	0	0	0	1	0	0	0	0	0	0	0	0	0.395787	0.604213	0	0	0
chr1	43615782	43616424	0.160441	0	0.178062	0.44275	0.0983228	0.0271501	0.617248	0.132782	0.586221	0.0213381	0.0243062	1.11729	0.182721	0.265437	0.0486751	0.0548354	1.04191	0.187529	0.217627	0.056088	0.0249153	0.574612	0.139786	0.420873	0.035505	0.0197655	0	0	0	1	0	0	0	0.971963	0.028037	0	0	0	0	0	0	0	0.34891	0.65109	0	0	0
chr1	43816004	43816479	0.0864371	0	0.0557596	0.0501873	0.0788365	0.0580263	0.0984689	0.0584788	0.422917	0.0238861	0.0309919	0.0913328	0.0921467	0.361459	0.0417486	0.011495	0.0335356	0.0240987	0.304198	0.0310948	0.0186223	0.0535163	0.0255894	0.22878	0.0235837	0.0175151	0	0	0	0	0	1	1	0	0	0	0	0	0	0	0	1	0	0	0	0	0
chr1	43884223	43884621	0.591492	0.14812	0.0967962	0.0507406	0.0254281	0.02942	0.152812	3.55581	0.0798448	0.0653203	0.0421932	0.228199	3.14878	0.0866799	0.0162096	0.0448193	0.156927	2.32465	0.0587221	0.0795248	0.0624029	0.115255	1.99948	0.0209387	0.0255357	0.0291209	1	0	0	0	0	0	0	0	0	0.444724	0.555276	0	0	0	0	0	0	0	0.444724	0.555276	0
chr1	43990581	43990979	1.06848	0.469986	0.0776156	0.0348445	0.0935954	0.0512755	0.128554	3.36732	0.0556221	0.0508906	0.0425468	0.174163	2.71246	0.0788465	0.0349702	0.01374	0.154291	2.48424	0.0680875	0.0593636	0.0584172	0.0882516	2.05996	0.0385684	0.0262156	0.0193353	1	1	0	0	0	0	0	0	0	0	1	0	0	0	0	0	0	0	0	1	0
chr1	44158989	44159387	0.853906	0.316865	0.0359548	0.027723	0.0572695	0.0236566	0.104175	2.98294	0.0551789	0	0.0318217	0.0792981	2.04798	0.0424298	0.0223911	0.0208324	0.193345	2.29352	0.0329636	0.0599239	0.0345182	0.0708957	1.77123	0.0490996	0.0238225	0.0247347	1	0	0	0	0	0	0	0	0	0	1	0	0	0	0	0	0	0	0	1	0
chr1	44175382	44175780	0.521216	0.111872	0.0855217	0.0544288	0.0593771	0.0338432	0.338301	2.92397	0.0568329	0.0202718	0.0333538	0.303293	2.36764	0.124957	0.0859144	0.040691	0.725861	2.42319	0.0869957	0.0862907	0.0557441	0.125412	2.11954	0.0391451	0.0214973	0.0280243	1	0	0	0	0	0	0	0	0	0	1	0	0	0	0	0	0	0	0	1	0
chr1	44223947	44224924	0.237437	0.0274965	0.0791998	0.106149	0.089396	0.0580163	0.153119	0.116331	1.41046	0.119943	0.158247	0.175154	0.224543	1.54517	0.113175	0.154973	0.121969	0.0401494	0.975795	0.0928059	0.139701	0.0971303	0.0868114	0.869198	0.0963975	0.186488	0	0	0	0	0	1	1	0	0	0	0	0	0	0	0	0.795292	0.204708	0	0	0	0
chr1	44736225	44736670	0.0447482	0.020123	0.0795019	0.0151272	0.0583905	0.0588438	0.0853962	0.0167622	0.00202669	0.0422422	0.0277229	0.0277024	0.0426972	0.00237555	0.0818077	0.0203742	0.0244749	0.0193461	0.0088287	0.0345114	0.0277886	0.0400576	0.0136952	0.00219814	0.0437803	0.0306881	0	0	0	0	0	1	0	0	0	0	0	0	1	0	0	0	0	0	0	0	0
chr1	45007802	45008354	0.044163	0	0.19961	0.573072	0.102349	0.0579409	0.026038	0.0953336	0.0363952	0.167123	0.066764	0.0368873	0.132566	0.0119084	0.0426459	0.0919854	0.0318605	0.0326815	0.0335363	0.0476704	0.0950938	0.0265521	0.0382662	0.0232842	0.0585387	0.073358	0	0	1	1	0	1	0	0	0	0	0	0	1	0	0	0	0	0	0	0	0
chr1	45319359	45319807	0.0411264	0	0.0916118	0.0692545	0.0746134	0.0571104	0.0495011	0.0385065	0.00699967	0.0435225	0.0115174	0.0358318	0.0360619	0.0315018	0.0553702	0.0290588	0.0352898	0.00548197	0.011466	0.0479657	0.0585678	0.0149552	0.0170689	0.021017	0.0304893	0.0564888	0	0	0	0	0	1	0	0	0	0	0	0	1	0	0	0	0	0	0	0	0
chr1	45588993	45589391	0.635336	0.0224993	0.101471	0.0616772	0.0553744	0.0274179	0.092988	0.126576	0.0169041	0.192864	0.037361	0.0834233	0.100261	0.0156129	0.23445	0.0323495	0.0542387	0.0429682	0.0336062	0.0742897	0.0452372	0.0481201	0.0497776	0.0404358	0.0573535	0.105004	1	0	0	0	0	0	0	0	0	0	0	0	1	0	0	0	0	0	0	0	0
chr1	45594708	45595106	0.417797	0	0.0670973	0.0775734	0.0509122	0.0315142	0.0741108	0.0523176	0.033795	0.133808	0.0424878	0.102856	0.0887594	0.0182015	0.0994553	0.0464283	0.0884041	0.0311066	0.0219575	0.0453119	0.0576052	0.0644993	0.0584881	0.0412047	0.0708828	0.123215	1	0	0	0	0	0	0	0	0	0	0	0	1	0	0	0	0	0	0	0	0
chr1	45596199	45597121	0.140551	0	0.146689	0.110449	0.0908712	0.0585951	0.154656	0.153074	0.0487964	0.195221	0.0654942	0.152519	0.237015	0.0521301	0.171888	0.0508674	0.0827481	0.0580029	0.0306543	0.0910313	0.115483	0.0977428	0.1279	0.0320827	0.0949223	0.224767	0	0	0	0	0	1	0	0	0	0	0	0	1	0	0	0	0	0	0	0	0
chr1	45636886	45637284	2.779	0	0.134126	0.0249253	0.0523477	0.0338848	0.14892	0.0702434	0.014651	0.0593372	0.00874114	0.173152	0.134184	0.00690308	0.114212	0.0292162	0.0417305	0.0259755	0.0161468	0.0359078	0.047386	0.0672693	0.0441082	0.0269801	0.0260524	0.127768	1	0	0	0	0	0	0	0	0	0	0	0	1	0	0	0	0	0	0	0	0
chr1	45852189	45852587	1.03482	0.271241	0.00838718	0.0356075	0.0413824	0.0209843	0.0779409	3.05383	0.041648	0.0320971	0.0396004	0.0599646	2.60296	0.0497373	0.0198204	0.026104	0.170759	2.44256	0.0319655	0.0752739	0.049847	0.0296937	1.92244	0.0416029	0.0217965	0.0356585	1	0	0	0	0	0	0	0	0	0	1	0	0	0	0	0	0	0	0	1	0
chr1	45854743	45855262	0.0665503	0.0172538	0.174132	0.240195	0.071783	0.0260428	0.876428	0.210956	0.669184	0.0251537	0.0253367	0.803375	0.145916	0.621864	0.0589919	0.0131018	0.330894	0.0636934	0.347114	0.0418756	0.02192	0.306088	0.0573189	0.232032	0.0236489	0.0220229	0	0	0	1	0	0	0	1	0	0	0	0	0	0	0	0	1	0	0	0	0
chr1	45881212	45881898	0.167208	0.0522142	0.377796	0.0875777	0.0574891	0.0342153	1.2164	0.182382	0.663829	0.0407149	0.0397962	0.843656	0.200683	0.957711	0.0589424	0.0357557	0.367752	0.0463554	0.547389	0.0573676	0.0337183	0.162648	0.0258154	0.398387	0.0393179	0.0200842	0	0	1	0	0	0	0	1	0	0	0	0	0	0	0	0	1	0	0	0	0
chr1	45932450	45933093	0.0524393	0.0278529	0.261487	0.0714729	0.0929926	0.0294982	0.87824	0.133772	0.064504	0.0537198	0.0428831	1.03197	0.187717	0.107488	0.0775938	0.06353	0.860019	0.106822	0.109981	0.041127	0.0308541	0.114958	0.0440383	0.0527429	0.0772876	0.0486195	0	0	1	0	0	0	0	0	1	0	0	0	0	0	0	0	0	1	0	0	0
chr1	45951990	45952462	0.0159838	0	0.104866	0.157095	0.09055	0.0639612	0.307178	0.0990016	0.0385995	0.0723511	0.0735581	0.303046	0.0958093	0.103115	0.108369	0.0703009	0.166165	0.0279941	0.124659	0.0711486	0.0694635	0.0679158	0.0341897	0.0454771	0.0979269	0.0574086	0	0	0	0	0	1	0	0	1	0	0	0	0	0	0	0	0	1	0	0	0
chr1	45982838	45983979	0.0967066	0.361015	0.890097	0.572272	0.195069	0.0255736	0.818986	1.3535	0.0659325	0.0327285	0.0212749	0.778599	0.766706	0.0581382	0.0620177	0.0265855	0.623317	1.54701	0.0928252	0.0594414	0.0337728	0.358121	0.401253	0.0307477	0.423917	0.0581533	0	1	1	1	1	0	0	0	0.332165	0.667835	0	0	0	0	0	0	0	0.332165	0.667835	0	0
chr1	46004680	46005078	0.487301	0.0224993	0.212223	0.192535	0.0640299	0.0524818	0.503333	0.167945	0.0443177	0.28437	0.0497558	0.738691	0.158645	0.0483486	0.147731	0.102553	0.093484	0.0246694	0.0315416	0.201177	0.0260854	0.439584	0.0950244	0.0336118	0.26236	0.0521205	1	0	0	0	0	0	0	0	0.698492	0	0	0	0.301508	0	0	0	0	1	0	0	0
chr1	46079494	46080220	0.958367	0.0123343	0.0938806	0.149679	0.0477203	0.088274	0.0852392	0.0905155	0.0137362	0.169013	0.0358375	0.181868	0.115114	0.0213609	0.140222	0.0269845	0.0645437	0.0233948	0.0285118	0.0480622	0.0243748	0.412989	0.0774761	0.0681504	0.0319709	0.02454	1	0	0	0	0	1	0	0	0	0	0	0	1	0	0	0	0	0	0	0	0
chr1	46889151	46889803	0.0316433	0.0137342	0.215031	0.0103246	0.030305	0.0213696	0.295411	0.125491	0.0366561	0.00524199	0.00673876	0.215146	0.0475911	0.0942519	0.0237068	0.0204578	0.0411361	0.014823	0.0739029	0.0302046	0.0254483	0.0427294	0.0166608	0.207004	0.0279634	0.0250376	0	0	1	0	0	0	0	0	1	0	0	0	0	0	0	0	0	1	0	0	0
chr1	46910087	46910485	0.979245	0.258742	0.0222741	0.00788453	0.0474927	0.0204398	0.0974261	2.67178	0.0138306	0.0454003	0.0327449	0.073647	1.67644	0.0336391	0.027199	0.0295126	0.186681	2.129	0.0160511	0.0668813	0.0283092	0.0709223	1.92055	0.026472	0.0218917	0.0141579	1	0	0	0	0	0	0	0	0	0	1	0	0	0	0	0	0	0	0	1	0
chr1	47184273	47184698	0.0472163	0	0.0104939	0.0158391	0.0782417	0.0594556	0.0486216	0.0630869	0.0155496	0.0945243	0.0739483	0.018774	0.0795619	0.00928015	0.0449696	0.060093	0.0336062	0.0200943	0.0113952	0.0522255	0.0805381	0.0198498	0.0266033	0.0154039	0.0352208	0.0415562	0	0	0	0	0	1	0	0	0	0	0	0	1	0	0	0	0	0	0	0	0
chr1	50290632	50291108	0.0647997	0	0.0909365	0.0169066	0.101929	0.0636828	0.118672	0.111452	0.0404856	0.0583831	0.171403	0.0559581	0.127241	0.0391859	0.0610064	0.119258	0.0610502	0.0297759	0.0376677	0.0658074	0.0770486	0.0633175	0.0942216	0.0199644	0.0686927	0.0756003	0	0	0	0	0	1	0	0	0	0	0	0	1	0	0	0	0	0	0	0	0
chr1	51356970	51357712	0.275009	0.0241367	0.103693	0.0390857	0.0434499	0.0970782	0.0827164	0.0654524	0.0160526	0.111492	0.0257191	0.0696254	0.102629	0.0214354	0.175861	0.0466275	0.0734209	0.0273226	0.068833	0.0632	0.0400794	0.43794	0.313007	0.130099	0.0390126	0.0400479	0	0	0	0	0	1	0	0	0	0	0	0	1	0	0	0	0	0	0	0	0
chr1	51535019	51535417	3.3242	0.584982	0.152481	0.0507406	0.0612945	0.0339352	0.102685	2.50023	0.0297058	0.0477936	0.0211555	0.125462	1.78785	0.0412433	0.0268262	0.00840494	0.256323	2.18439	0.0354246	0.168112	0.0481356	0.0903388	1.72402	0.0314287	0.0335582	0.0303562	1	1	0	0	0	0	0	0	0	0	1	0	0	0	0	0	0	0	0	1	0
chr1	51610376	51610977	0.126213	0	0.219939	0.0880894	0.0387496	0.0287915	0.434417	0.153015	0.0239584	0.125483	0.0210993	0.476892	0.134023	0.0350804	0.0555695	0.0298069	0.187984	0.0323912	0.0149212	0.0477214	0.0215187	0.161025	0.0328038	0.033188	0.0513799	0.0192204	0	0	1	0	0	0	0	0	1	0	0	0	0	0	0	0	0	1	0	0	0
chr1	51622836	51623647	0.113528	0.20979	0.289437	0.0508008	0.0928601	0.0323825	0.443347	0.129176	0.0439135	0.260766	0.0377979	0.602879	0.147905	0.0394615	0.0989929	0.0310758	0.570822	0.0436516	0.0474908	0.0610691	0.0301767	0.256324	0.0566453	0.0218452	0.0880288	0.0215321	0	0	1	0	0	0	0	0	0.797781	0	0	0	0.202219	0	0	0	0	1	0	0	0
chr1	51641822	51642220	0.469764	0	0.115702	0.0868569	0.0711159	0.0541155	0.45266	0.0833603	0.0479121	0.490114	0.0493237	0.48862	0.141884	0.0494542	0.208271	0.0442689	0.657708	0.0441676	0.038159	0.0751096	0.04475	0.588576	0.186342	0.0650541	0.0471555	0.0212924	1	0	0	0	0	0	0	0	0	0	0	0	0	0.050251	0.949749	0	0	1	0	0	0
chr1	51650629	51651027	0.686273	0.0899972	0.0446169	0.0935971	0.0342966	0.0189739	0.234188	0.0568903	0.015211	0.1885	0.0280699	0.367739	0.082468	0.0240125	0.0895252	0.0209382	0.0978813	0.0195249	0.0048126	0.10067	0.0174278	0.291691	0.0866292	0.0427974	0.0581691	0.0150463	1	0	0	0	0	0	0	0	0	0	0	0	0.932161	0	0.067839	0	0	0.570352	0	0	0
chr1	51692550	51693328	0.0791601	0.0115099	0.114369	0.064796	0.132428	0.0463338	0.138091	0.0638843	0.0126849	0.176585	0.0296237	0.238165	0.117797	0.0326724	0.251981	0.0354265	0.496152	0.0700613	0.0309985	0.0851059	0.0306322	0.394641	0.0826163	0.0337643	0.109007	0.0356882	0	0	0	0	1	0	0	0	0	0	0	0	1	0	0	0	0	0	0	0	0
chr1	51808244	51808620	0.0926799	0.0476314	0.0744433	0.0537096	0.0701382	0.0684455	0.0366494	0.0569921	0.0144882	0.039712	0.0224973	0.0502915	0.0743204	0.0128586	0.147089	0.0198775	0.0279979	0.0194964	0.0626063	0.0319899	0.0425284	0.0482018	0.0448296	0.0186322	0.0527212	0.0162939	0	0	0	0	0	1	0	0	0	0	0	0	1	0	0	0	0	0	0	0	0
chr1	51810117	51810754	0.0684025	0.0425635	0.0761137	0.0256643	0.0762506	0.0601017	0.0299708	0.103658	0.0530201	0.123317	0.0375801	0.0874333	0.122094	0.0338981	0.151279	0.0328579	0.064629	0.0349073	0.0895418	0.0572881	0.0435479	0.0634672	0.0470493	0.0569112	0.118047	0.0659625	0	0	0	0	0	1	0	0	0	0	0	0	1	0	0	0	0	0	0	0	0
chr1	52068126	52068524	0.723795	0.0449987	0.105046	0.152222	0.0599152	0.0804861	0.169592	0.121015	0.027023	0.132471	0.0889242	0.225244	0.264667	0.0404478	0.236824	0.0522504	0.0837203	0.0457803	0.0347683	0.0746999	0.0722474	0.398931	0.483287	0.0838099	0.0411047	0.028288	1	0	0	0	0	0	0	0	0	0	0	0	1	0	0	0	0	0	0	0	0
chr1	52069589	52069987	0.549197	0	0.071291	0.207668	0.0388934	0.0246786	0.110406	0.0933214	0.0156929	0.14859	0.0205662	0.0823721	0.114378	0.0207093	0.308629	0.0371765	0.0814671	0.033972	0.0289166	0.100493	0.0360424	0.525828	0.141955	0.368947	0.0222316	0.0259145	1	0	0	0	0	0	0	0	0	0	0	0	1	0	0	0	0	0	0	0	0
chr1	52206691	52207301	0.276802	0.0440396	0.136942	0.296131	0.0848414	0.050508	0.709705	0.166837	1.14498	0.0828036	0.03404	0.961589	0.167644	0.811571	0.0629058	0.0562754	0.761578	0.0932876	0.2908	0.0734688	0.0499992	0.750429	0.231226	0.490996	0.0503113	0.0326752	0	0	0	1	0	0	0.178689	0.821311	0	0	0	0	0	0	0	0	1	0	0	0	0
chr1	52207368	52207957	1.1398	0.212846	0.101781	0.113515	0.0853889	0.0748545	0.220875	0.186407	1.49278	0.152677	0.0439609	1.26013	0.220044	1.09927	0.0702406	0.0653346	0.77522	0.106205	0.434481	0.0753402	0.0465059	0.832218	0.359582	0.536669	0.0562122	0.0296477	1	0	0	0	0	1	0.266553	0.733447	0	0	0	0	0	0	0	0	1	0	0	0	0
chr1	52289090	52289488	0.542879	0.202494	0.256565	0.041203	0.0664181	0.0182367	0.224947	3.98309	0.119969	0.0316043	0.0216663	0.219314	3.11795	0.111339	0.0224108	0.0568022	0.396576	2.531	0.0681969	0.0641748	0.0343183	0.0922657	2.3	0.0551548	0.0295197	0.0232218	1	0	0	0	0	0	0	0	0	0.276382	0.723618	0	0	0	0	0	0	0	0.276382	0.723618	0
chr1	52289845	52290243	0.879049	0.205619	0.114602	0.0338272	0.022984	0.0210849	0.0742627	2.25764	0.0135701	0.0290001	0.0193091	0.0958961	1.21251	0.024781	0.0268065	0.0181225	0.192976	1.87053	0.0124006	0.0493715	0.0112562	0.054262	1.68133	0.0154329	0.0193897	0.0133251	1	0	0	0	0	0	0	0	0	0.10804	0.89196	0	0	0	0	0	0	0	0.10804	0.89196	0
chr1	52486721	52487621	0.453003	0.0397988	0.410635	0.111631	0.0416279	0.0400232	0.717776	0.138664	0.02037	0.261873	0.0274236	0.388882	0.143361	0.0392797	0.145525	0.0272351	0.117434	0.024854	0.0216572	0.0704076	0.0301096	0.34992	0.0848636	0.0310939	0.061369	0.0223184	1	0	1	0	0	0	0	0	1	0	0	0	0	0	0	0	0	1	0	0	0
chr1	52510765	52512204	0.267167	0.0808974	2.20156	0.399387	0.070227	0.0394037	0.668569	0.151238	0.0334982	0.0183194	0.0299841	0.689152	0.143919	0.251889	0.0518504	0.156987	0.365136	0.0310116	0.0592821	0.0639589	0.0306419	0.271086	0.0423849	0.227701	0.0484348	0.0195368	0	0	1	1	0	0	0	0	1	0	0	0	0	0	0	0	0.719249	0.280751	0	0	0
chr1	52514739	52515499	0.0563865	0	0.332296	0.0854438	0.0556078	0.0311294	0.602457	0.090536	0.262959	0.0382619	0.0356641	0.383663	0.10041	0.625341	0.0502846	0.073529	0.0631795	0.0148593	0.133346	0.0510087	0.0275435	0.118262	0.0198887	0.56356	0.0274574	0.0133457	0	0	1	0	0	0	0.080263	0.919737	0	0	0	0	0	0	0	0.080263	0.919737	0	0	0	0
chr1	52519913	52520894	0.092704	0	1.49322	0.0485498	0.0505949	0.026064	0.815285	0.19934	0.313967	0.0225887	0.0339255	0.878137	0.170568	0.673743	0.0420456	0.0491137	0.295618	0.0330591	0.182116	0.0429667	0.0247851	0.148424	0.0479348	0.652754	0.0408279	0.0112684	0	0	1	0	0	0	0	0.503568	0.088685	0.407747	0	0	0	0	0	0	1	0	0	0	0
chr1	52527935	52528333	1.47403	0.0224993	0.0915026	0.11369	0.0572807	0.0269152	0.382926	0.112729	0.665654	0.0525799	0.0581041	0.199366	0.0942958	0.758908	0.0706861	0.0370283	0.0785725	0.0509647	0.137433	0.0870975	0.0234744	0.361663	0.0452469	0.6473	0.029479	0.0283158	1	0	0	0	0	0	0	1	0	0	0	0	0	0	0	1	0	0	0	0	0
chr1	52580874	52581510	0.242085	0.0140798	0.168298	0.402123	0.0601843	0.027228	0.428944	0.120467	0.0446441	0.539543	0.0642643	0.910653	0.155184	0.0602165	0.120018	0.0492185	0.0822144	0.0374893	0.0255734	0.081517	0.0175904	0.299747	0.0641046	0.0929938	0.0445447	0.0298281	0	0	0	1	0	0	0	0	0	0	0	0	0	0.371069	0.628931	0	0	1	0	0	0
chr1	52622896	52623630	0.0561468	0	0.261984	0.0721967	0.0552066	0.0272946	0.680168	0.128537	0.0334649	0.38602	0.0300468	0.929026	0.148233	0.061191	0.0962679	0.058868	0.150582	0.0441767	0.0199201	0.105564	0.039412	0.325661	0.0484844	0.0681597	0.103929	0.0450905	0	0	1	0	0	0	0	0	0.040872	0	0	0	0	0	0.959128	0	0	1	0	0	0
chr1	52635061	52635813	0.56502	0.0952631	0.221038	0.134947	0.0626318	0.105718	1.29175	0.312456	0.0357449	0.114777	0.0414391	1.30326	0.23271	0.0489226	0.0460731	0.0454361	0.232186	0.0531918	0.0334306	0.0791717	0.0362602	0.503265	0.533628	0.0499959	0.0393214	0.0118568	1	0	0	0	0	1	0	0	0.468085	0.531915	0	0	0	0	0	0	0	1	0	0	0
chr1	52779279	52779988	1.51983	0.0631504	0.15398	0.148343	0.0650017	0.0966261	0.48457	0.127538	0.0291839	0.388805	0.0325177	0.355603	0.188452	0.0437385	0.286043	0.0382919	0.0737567	0.0374225	0.0321579	0.175267	0.0321196	0.582361	0.412411	0.0818235	0.055789	0.0124279	1	0	0	0	0	1	0	0	0	0	0	0	0	0.435825	0.564175	0	0	0	0	0	0
chr1	52781729	52782166	0.023136	0.0204914	0.0814582	0.101922	0.0358921	0.0796279	0.0839695	0.058539	0.00853986	0.259695	0.0155643	0.0851706	0.0641066	0.00548885	0.176583	0.0478765	0.0301837	0.0133763	0.0174826	0.21625	0.0163958	0.191463	0.119975	0.0413539	0.0366809	0.0148538	0	0	0	0	0	1	0	0	0	0	0	0	0	1	0	0	0	0	0	0	0
chr1	52809528	52809926	0.885629	0	0.126976	0.071724	0.0305407	0.0425887	0.423537	0.0879975	0.0159794	0.164779	0.0187787	0.69102	0.132019	0.0313336	0.0563213	0.0188635	0.165284	0.011635	0.0143421	0.0827095	0.0184897	0.384853	0.190558	0.0394747	0.0306484	0.00977171	1	0	0	0	0	0	0	0	1	0	0	0	0	0	0	0	0	1	0	0	0
chr1	52857054	52857452	1.40774	0	0.0857967	0.0303936	0.0518541	0.0826892	0.220873	0.0945885	0.0253561	0.336527	0.0200556	0.426355	0.141759	0.0323717	0.193828	0.0359486	0.146535	0.042595	0.026524	0.0720342	0.0218003	0.390085	0.483928	0.0711915	0.048624	0.00555215	1	0	0	0	0	0	0	0	0	0	0	0	0	1	0	0	0	1	0	0	0
chr1	52901765	52902163	0.763123	0.209993	0.113777	0.0337	0.0359896	0.0322011	0.211237	2.43426	0.0338862	0.0163301	0.0284235	0.125759	1.66242	0.0272214	0.020311	0.0388703	0.306206	1.9736	0.0276314	0.0427421	0.0328067	0.0801419	1.63046	0.0267741	0.0287855	0.036061	1	0	0	0	0	0	0	0	0	0	1	0	0	0	0	0	0	0	0	1	0
chr1	53137406	53137956	0.0559877	0	0.123425	0.11089	0.0420832	0.0819387	0.129717	0.0933035	0.020469	0.228395	0.0546686	0.113633	0.105623	0.0207814	0.213309	0.0240987	0.0523816	0.0182953	0.0283157	0.0378734	0.0448676	0.338231	0.134853	0.0381434	0.0354813	0.0252011	0	0	0	0	0	1	0	0	0	0	0	0	1	0	0	0	0	0	0	0	0
chr1	53353672	53354070	0.688203	0.215618	0.0438609	0.0100464	0.0576618	0.0411227	0.198805	3.64974	0.0845071	0.0394878	0.0574559	0.163891	2.84893	0.103721	0.0414265	0.0627936	0.214142	2.48424	0.0612241	0.0617143	0.0605786	0.0895495	1.88631	0.0172727	0.0281872	0.0239574	1	0	0	0	0	0	0	0	0	0	1	0	0	0	0	0	0	0	0	1	0
chr1	53377649	53379284	0.101263	0	0.778235	0.154534	0.0811886	0.0278204	0.739375	0.147479	0.198265	0.0349195	0.0385732	0.694168	0.107211	0.552218	0.0420854	0.117688	0.517163	0.0436614	0.496017	0.0353893	0.0303382	0.155518	0.0420841	0.403964	0.0339168	0.0221414	0	0	1	1	0	0	0	0.296024	0.703976	0	0	0	0	0	0	0.092355	0.907645	0	0	0	0
chr1	53380802	53381771	0.0227745	0.0092412	0.661897	0.0826843	0.0380927	0.0236479	0.573797	0.138375	0.10736	0.00693858	0.0124086	0.585836	0.119065	0.300622	0.0393099	0.0265218	0.304601	0.0313555	0.369175	0.0304346	0.0129976	0.175204	0.0193656	0.280683	0.0307558	0.0132322	0	0	1	0	0	0	0	0	0.793602	0.206398	0	0	0	0	0	0	0.176471	0.823529	0	0	0
chr1	53409212	53409610	0.736045	0.0818725	0.0526603	0.0797356	0.0682681	0.0285236	0.211389	3.42029	0.0691788	0.0465265	0.0696738	0.255365	2.71898	0.104113	0.0506302	0.0671549	0.270962	2.36433	0.0997245	0.0712688	0.0810299	0.088733	2.0008	0.0666055	0.0582237	0.0199321	1	0	0	0	0	0	0	0	0	0	1	0	0	0	0	0	0	0.025126	0	0.974874	0
chr1	53520600	53521309	0.0207025	0	0.323013	0.06946	0.0450947	0.0275188	0.111702	0.0674865	0.0196582	0.162674	0.0167385	0.206655	0.10492	0.0209118	0.118302	0.0629047	0.0709285	0.0317215	0.0183661	0.0681821	0.0419378	0.0446501	0.0298742	0.0132416	0.0728105	0.0526411	0	0	1	0	0	0	0	0	0	0	0	0	1	0	0	0	0	0.564175	0	0	0
chr1	53841704	53842102	0.816641	0.202494	0.0624913	0.000508681	0.0299801	0.0207665	0.147249	3.33504	0.0522877	0.0168932	0.0499719	0.172596	3.03956	0.065296	0.025217	0.0290256	0.144855	2.20054	0.0675265	0.0616871	0.0928105	0.0643385	1.94798	0.043278	0.0357882	0.0279133	1	0	0	0	0	0	0	0	0	0.241206	0.758794	0	0	0	0	0	0	0	0	1	0
chr1	53907649	53908047	0.762481	0	0.133232	0.0436192	0.0838637	0.0299645	0.374293	0.126211	0.0386136	0.180827	0.0316645	0.854674	0.211341	0.0630584	0.0730802	0.0311428	0.358601	0.0604408	0.0449403	0.0495082	0.0405524	0.622859	0.288502	0.0829585	0.0700532	0.0186135	1	0	0	0	0	0	0	0	0.88191	0	0	0	0.11809	0	0	0	0	1	0	0	0
chr1	53908225	53908623	0.394586	0	0.0600165	0.158835	0.0480648	0.0334074	0.170625	0.0717676	0.015771	0.199199	0.0222555	0.512297	0.0847832	0.036403	0.117706	0.0335774	0.128879	0.0633725	0.0328132	0.0495902	0.0210508	0.34135	0.329521	0.0268016	0.0539133	0.0251511	1	0	0	0	0	0	0	0	0	0	0	0	1	0	0	0	0	1	0	0	0
chr1	54050588	54051120	0.157825	0	0.087999	0.00180763	0.0693243	0.0622375	0.107112	0.0843024	0.0292676	0.184359	0.0316832	0.0813098	0.117781	0.0343852	0.173458	0.024233	0.0912475	0.0259835	0.0339072	0.0568867	0.0597413	0.33669	0.0769264	0.106201	0.0915519	0.139397	0	0	0	0	0	1	0	0	0	0	0	0	1	0	0	0	0	0	0	0	0
chr1	54362480	54362878	0.429919	0	0.0768596	0.160743	0.0653306	0.0303331	0.0563582	0.068118	0.0201728	0.198565	0.0335503	0.236547	0.0870481	0.0156803	0.183486	0.0504085	0.0559045	0.0235765	0.0180199	0.0579693	0.0323445	0.215309	0.0333991	0.053356	0.0536958	0.0395033	1	0	0	0	0	0	0	0	0	0	0	0	1	0	0	0	0	0	0	0	0
chr1	54495600	54495998	0.567637	0.0449987	0.0548605	0.0129713	0.0287244	0.0283812	0.142963	2.39828	0.0423122	0.0734854	0.0170305	0.128773	1.28476	0.0611164	0.0147966	0.0171698	0.231102	2.14478	0.0303385	0.0410199	0.0288214	0.120742	1.86384	0.0788808	0.0289487	0.0168507	1	0	0	0	0	0	0	0	0	0	1	0	0	0	0	0	0	0	0	1	0
chr1	54747456	54747854	2.28254	0.0449987	0.181424	0.0737586	0.0723716	0.0426137	0.131564	0.120243	0.0285988	0.34624	0.0455129	0.306803	0.155776	0.0314684	0.419328	0.0866533	0.200651	0.0593343	0.0665149	0.130058	0.0356051	0.50043	0.117327	0.14826	0.110138	0.0319525	1	0	0	0	0	0	0	0	0	0	0	0	1	0	0	0	0	0	0	0	0
chr1	54896825	54897223	0.64849	0	0.0677849	0.0541742	0.071385	0.0272168	0.147097	0.0495482	0.0262026	0.0998104	0.0240234	0.151597	0.153184	0.041459	0.198086	0.0358639	0.13165	0.0358246	0.030776	0.0835021	0.0193767	0.435289	0.0675009	0.0565691	0.179349	0.037338	1	0	0	0	0	0	0	0	0	0	0	0	1	0	0	0	0	0	0	0	0
chr1	54898661	54899059	1.6129	0.0718728	0.127114	0.0628221	0.0746813	0.0431415	0.332617	0.119577	0.0644776	0.510738	0.055354	0.210788	0.151019	0.0395849	0.284196	0.0455815	0.17801	0.0400627	0.0703294	0.111031	0.0602415	0.59615	0.234884	0.0534933	0.192334	0.0337291	1	0	0	0	0	0	0	0	0	0	0	0	0	0.497487	0.502513	0	0	0	0	0	0
chr1	54928151	54928549	0.81406	0	0.15365	0.0979205	0.0642655	0.0363227	0.133023	0.0717032	0.0386396	0.169354	0.0425272	0.256178	0.106703	0.0392883	0.230936	0.0821652	0.117258	0.0350383	0.0317878	0.0751096	0.043938	0.515123	0.122112	0.0869127	0.0406152	0.0432094	1	0	0	0	0	0	0	0	0	0	0	0	1	0	0	0	0	0	0	0	0
chr1	54982728	54983126	0.660094	0.0449987	0.0454419	0.0113181	0.0342069	0.0131603	0.190535	0.170112	0.0609613	0.487719	0.34338	0.0809444	0.218564	0.0653502	0.149909	0.244357	0.283265	1.20531	0.0448857	1.65207	0.0873764	0.13684	2.20413	0.0241516	0.192212	0.0289265	1	0	0	0	0	0	0	0	0	0	0	0	0	0.819095	0.180905	0	0	0	0	0	0
chr1	55013877	55014570	0.138043	0.129217	0.160102	0.270743	0.0926387	0.0511458	0.211383	0.165448	0.0590425	0.510447	0.091931	0.406076	0.371226	0.0609629	0.30509	0.0735978	0.130333	0.0553475	0.0718623	0.124048	0.0779341	0.148678	0.152291	0.0570123	0.16667	0.0779548	0	0	0	1	0	0	0	0	0	0	0	0	0	1	0	0	0	0	0	0	0
chr1	55042467	55043294	0.101713	0.0108279	0.362117	0.0968819	0.0517881	0.0299338	0.698741	0.0946791	0.602792	0.0118562	0.017016	0.712508	0.149246	0.858181	0.0742886	0.0236176	0.141949	0.0243604	0.758477	0.0405742	0.016059	0.158056	0.0502028	0.555734	0.0452505	0.0139545	0	0	1	0	0	0	0	1	0	0	0	0	0	0	0	0	1	0	0	0	0
chr1	55084273	55084671	1.04553	0.166245	0.0219991	0.0540472	0.0344088	0.0191163	0.203029	1.58743	0.0496963	0.0148519	0.0449236	0.191633	0.7823	0.0510047	0.027513	0.0121522	0.308199	1.94981	0.0427118	0.0336661	0.0448624	0.121785	1.51436	0.0333235	0.0112586	0.0205151	1	0	0	0	0	0	0	0	0	0.178392	0.821608	0	0	0	0	0	0	0	0.680905	0.319095	0
chr1	55132686	55133330	0.204969	0	0.157711	0.519654	0.0704194	0.0271227	0.584747	0.118824	0.328192	0.0615972	0.0392353	0.856694	0.14901	0.498612	0.0726464	0.141412	0.722931	0.0652667	0.317045	0.0468918	0.0233401	0.234305	0.050753	0.383952	0.0347561	0.0235729	0	0	0	1	0	0	0	1	0	0	0	0	0	0	0	0	1	0	0	0	0
chr1	55144404	55144802	1.25404	0.0449987	0.109927	0.0338272	0.0354514	0.0234974	0.120863	3.34687	0.0545668	0.0403325	0.0678077	0.199347	2.94983	0.129473	0.0228817	0.0547274	0.331728	2.42779	0.0728587	0.03953	0.0706732	0.0795667	2.15067	0.0607977	0.0128767	0.0397115	1	0	0	0	0	0	0	0	0	0	1	0	0	0	0	0	0	0	0	1	0
chr1	55145018	55145416	0.561576	0.235618	0.0338923	0.0770647	0.0556662	0.0233718	0.124511	3.18321	0.054645	0.0180194	0.0327253	0.128971	2.57966	0.0887023	0.0256683	0.0430833	0.387427	2.52618	0.060021	0.0734422	0.0385535	0.0914631	1.98413	0.035891	0.0214702	0.0101326	1	0	0	0	0	0	0	0	0	0	1	0	0	0	0	0	0	0	0	1	0
chr1	55149205	55149874	0.0186417	0	0.279954	0.0941154	0.0480576	0.0250526	0.570799	0.109057	0.291802	0.0559453	0.0310146	0.668628	0.125266	0.621735	0.0894752	0.0841856	0.344846	0.0292811	0.257826	0.0488557	0.0264814	0.158446	0.0366333	0.235879	0.0443697	0.0170933	0	0	1	0	0	0	0	1	0	0	0	0	0	0	0	0	1	0	0	0	0
chr1	55187963	55188361	0.786982	0.179994	0.0825656	0.0169136	0.0541861	0.0159163	0.0846893	2.9379	0.0403196	0.0402622	0.018268	0.0970065	2.1869	0.071606	0.0149732	0.0353982	0.0702154	2.17994	0.0407293	0.056329	0.0519085	0.0342166	1.9069	0.0254011	0.0330686	0.0226666	1	0	0	0	0	0	0	0	0	0	1	0	0	0	0	0	0	0	0	1	0
chr1	55255511	55256159	0.147313	0.0690951	0.0764683	0.301182	0.0607916	0.0212699	0.408436	0.0991956	0.0272279	0.273228	0.0297395	1.20996	0.178602	0.0504726	0.106838	0.031962	0.657687	0.0673524	0.0314651	0.0423039	0.0302554	0.203615	0.0663404	0.0249367	0.0841908	0.017059	0	0	0	1	0	0	0	0	0.862654	0	0	0	0.137346	0	0	0	0	1	0	0	0
chr1	55293862	55294260	1.00968	0.224993	0.0521793	0.0604058	0.0479412	0.0332147	0.198318	2.87438	0.0434191	0.0127403	0.0190538	0.208884	2.36451	0.0465285	0.0306137	0.0204514	0.216982	2.37739	0.043327	0.0651998	0.0420141	0.10364	1.73064	0.0208701	0.0353122	0.0259701	1	0	0	0	0	0	0	0	0	0	1	0	0	0	0	0	0	0	0	1	0
chr1	55585620	55586018	0.678149	0.0899972	0.144369	0.0413302	0.064456	0.04893	0.137247	0.0566541	0.0334955	0.404591	0.0335699	0.299942	0.137455	0.0352975	0.2579	0.054177	0.0963514	0.0501917	0.0183617	0.117865	0.0684243	0.442621	0.117909	0.0471636	0.23832	0.0648764	1	0	0	0	0	0	0	0	0	0	0	0	1	0	0	0	0	0	0	0	0
chr1	56003422	56004270	0.00702044	0.0211196	0.0343632	0.0262021	0.179227	0.0163989	0.0209726	0.0405651	0.00220042	0.0117278	0.0298151	0.0196374	0.0471506	0.00541668	0.0379468	0.0401134	0.268497	0.0666114	0.0113001	0.0304469	0.0239464	0.0855908	0.0110985	0.0146863	0.026363	0.0101106	0	0	0	0	1	0	0	0	0	0	0	0	1	0	0	0	0	0	0	0	0
chr1	57049084	57049482	0.94314	0.0224993	0.113708	0.117632	0.0796031	0.0351918	0.140439	0.135463	0.0212538	0.0788348	0.452281	0.10706	0.142765	0.0390187	0.0956876	0.242515	0.151765	0.0349183	0.0168988	0.101573	0.0443627	0.428718	0.138733	0.0456396	0.154425	0.0751202	1	0	0	0	0	0	0	0	0	0	0	1	0	0	0	0	0	0	0	0	1
chr1	57158055	57158389	0.264293	0.0543658	0.118867	0.282012	0.0752172	0.0370739	0.123014	0.138857	0.0274524	0.0448736	0.538617	0.119044	0.239153	0.0419486	0.14199	0.274833	0.0831491	0.0522339	0.0253829	0.090626	0.171572	0.0620446	0.106462	0.0422775	0.101737	0.273059	0	0	0	1	0	0	0	0	0	0	0	1	0	0	0	0	0	0	0	0	0.565868
chr1	58026620	58027018	0.742491	0.179994	0.0482606	0.00521396	0.034263	0.0204733	0.165092	3.03888	0.0353839	0.0632789	0.0344342	0.11755	1.6511	0.0532833	0.0433105	0.0301053	0.365005	2.05894	0.0197426	0.0392293	0.0357301	0.101659	1.82776	0.0434015	0.0210894	0.0350478	1	0	0	0	0	0	0	0	0	0	1	0	0	0	0	0	0	0	0.045226	0.954774	0
chr1	58052386	58052784	0.525984	0.0224993	0.0627663	0.0328098	0.0502062	0.0308441	0.525737	1.50358	0.0655064	0.0493422	0.0458272	0.435199	0.841742	0.0654313	0.0531814	0.014587	0.595915	1.3306	0.0298326	0.0585432	0.0389533	0.222428	1.38942	0.0454885	0.0384668	0.0133112	1	0	0	0	0	0	0	0	0.035176	0.964824	0	0	0	0	0	0	0	0.035176	0.964824	0	0
chr1	58272217	58272615	1.80208	0.0224993	0.0983775	0.0845677	0.0928779	0.0623165	0.330154	0.258819	0.0727474	0.272895	0.300794	0.525424	0.4898	0.0763249	0.104263	0.253122	0.116548	0.0578019	0.0425614	0.102529	0.173378	0.485603	0.451658	0.126841	0.142255	0.496193	1	0	0	0	0	0	0	0	0.540201	0	0	0	0.459799	0	0	0	0	0	1	0	0
chr1	58449742	58450140	0.949714	0.382488	0.09604	0.0338272	0.0372901	0.0199289	0.0357482	2.37748	0.0342769	0	0.0213127	0.0653383	1.44793	0.0383445	0.0130893	0.00658422	0.138423	2.48859	0.0521456	0.0456536	0.0446376	0.0396763	1.93753	0.0201836	0.0190906	0.0183498	1	1	0	0	0	0	0	0	0	0	1	0	0	0	0	0	0	0	0	0.854271	0
chr1	58480746	58481144	0.751262	0.231243	0.086759	0.0927068	0.0614627	0.0370262	0.572672	2.19291	0.0341337	0.0211165	0.0276966	0.326652	1.62248	0.0625051	0.0429376	0.045772	0.405766	1.94396	0.072148	0.0698881	0.0333564	0.173706	1.5073	0.0783179	0.0266915	0.0119787	1	0	0	0	0	0	0	0	0	0.864322	0.135678	0	0	0	0	0	0	0	0.361809	0.638191	0
chr1	58559830	58560473	0.163225	0	0.203913	0.337922	0.122487	0.0190916	0.734357	0.233792	0.264481	0.028581	0.038737	0.48832	0.485765	0.270899	0.0266623	0.0422354	0.715062	1.38061	0.162915	0.0486315	0.0259592	0.474978	0.202608	0.0943441	0.0476199	0.0135918	0	0	0	1	0	0	0	0.88647	0	0.11353	0	0	0	0	0	0	0	0	1	0	0
chr1	58561540	58561938	0.837401	0.246867	0.0382923	0.0180581	0.0396782	0.0196775	0.189654	3.30773	0.0743884	0.0608859	0.0476736	0.0966095	2.31371	0.0818531	0.0140705	0.036986	0.148829	2.35029	0.0815819	0.0452845	0.0523456	0.0755792	1.90366	0.0488937	0.0339117	0.0303562	1	0	0	0	0	0	0	0	0	0.150754	0.849246	0	0	0	0	0	0	0	0	1	0
chr1	58643006	58643404	0.446811	0.126246	0.0465421	0.183251	0.044589	0.0251896	0.122444	2.73573	0.0320369	0.0169636	0.032961	0.0327783	1.71366	0.0447353	0.0548298	0.031672	0.0704882	2.36333	0.0302018	0.0316568	0.0222501	0.0220929	2.04506	0.0115334	0.0253318	0.0191964	1	0	0	0	0	0	0	0	0	0	1	0	0	0	0	0	0	0	0	1	0
chr1	58650594	58650926	0	0	0.0434322	0.00381126	0.107269	0.0794848	0.0544431	0.0112208	0.108129	0.0146823	0.0132339	0.0274324	0.0340602	0.122175	0.0101159	0.00933976	0.0337874	0.0115035	0.0385823	0.0349678	0.0109479	0.0343935	0.014784	0.0803076	0.00480861	0.00875246	0	0	0	0	0	1	1	0	0	0	0	0	0	0	0	1	0	0	0	0	0
chr1	58768340	58768738	0.676214	0.0449987	0.113158	0.0153875	0.0569331	0.025265	0.393048	3.44603	0.0835953	0.0968543	0.0292092	0.183384	2.58283	0.0382232	0.0296324	0.0566963	0.321486	2.50409	0.063589	0.0677012	0.0425138	0.105072	2.20191	0.0669629	0.0415942	0.0347563	1	0	0	0	0	0	0	0	0	0.849246	0.150754	0	0	0	0	0	0	0	0	1	0
chr1	58770055	58770453	0.589429	0.134996	0.0844218	0.125262	0.0583905	0.0304252	0.29012	2.62846	0.150964	0.0168932	0.0430182	0.226354	1.33952	0.197358	0.0382474	0.0517846	0.688062	1.63667	0.131964	0.0724308	0.0171279	0.0744949	1.86625	0.102373	0.0299957	0.0326603	1	0	0	0	0	0	0	0	0	0.635678	0.364322	0	0	0	0	0	0	0	0.635678	0.364322	0
chr1	58773148	58773546	0.481241	0.0674979	0.327719	0.243403	0.0644899	0.0842559	0.964078	0.20195	0.448713	0.0342088	0.0239645	0.686162	0.192442	0.390713	0.0411126	0.0409026	0.350326	0.0542431	0.2814	0.05067	0.020651	0.240587	0.672854	0.172494	0.0312874	0.00666254	1	0	0	0	0	0	0	1	0	0	0	0	0	0	0	0	1	0	0	0	0
chr1	58799422	58800744	0.359215	0.0406417	0.492092	0.123394	0.0575301	0.03329	1.04836	0.253427	0.302755	0.0217844	0.0242462	0.974642	0.204653	0.485752	0.054342	0.0208486	0.344526	0.0471777	0.308022	0.0677838	0.0365658	0.590781	0.182174	0.537364	0.0377225	0.0237523	1	0	1	0	0	0	0	0.28593	0.411498	0.302572	0	0	0	0	0	0	1	0	0	0	0
chr1	59010271	59012170	0.0995632	0.730902	1.38254	1.03551	0.344062	0.0354085	0.769932	0.510204	0.106609	0.0177027	0.0226262	0.82949	0.377536	0.137973	0.039743	0.018454	1.01451	0.820477	0.37039	0.0468902	0.0234341	0.581248	0.371026	0.0963551	0.0326699	0.0124363	0	1	1	1	1	0	0	0	0.173249	0.826751	0	0	0	0	0	0	0	0.473407	0.526593	0	0
chr1	59013000	59013398	0.547781	0.0768725	0.12237	0.0647292	0.0452616	0.0464168	1.31247	0.363969	0.297045	0	0.0367718	1.48856	0.256112	0.300743	0.0457046	0.0325612	1.24207	0.909474	0.641919	0.0685487	0.0233745	0.56624	0.441191	0.085581	0.0673474	0.0232773	1	0	0	0	0	0	0	0	0	1	0	0	0	0	0	0	0	0	1	0	0
chr1	59018798	59019965	0.0797755	0.230199	0.336732	0.187275	0.199016	0.0278951	1.01922	0.203364	0.25805	0.0277745	0.0202114	0.988588	0.186905	0.332154	0.0298897	0.0178415	1.00851	0.574725	0.538151	0.03727	0.0274474	0.355619	0.0473804	0.192855	0.0323173	0.022514	0	1	1	0	1	0	0	0.484147	0.515853	0	0	0	0	0	0	0	0.485861	0.514139	0	0	0
chr1	59029963	59030361	0.668865	0.17187	0.062285	0.0660011	0.045553	0.0272336	0.164606	3.33439	0.0386266	0.0435704	0.0272448	0.09772	2.47276	0.103034	0.0307118	0.0399923	0.078873	2.52405	0.182045	0.0343359	0.0578553	0.0590392	2.16849	0.0523812	0.0172278	0.0302451	1	0	0	0	0	0	0	0	0	0	1	0	0	0	0	0	0	0	0	1	0
chr1	59131985	59132383	1.31452	0	0.118589	0.0576078	0.0324691	0.0175163	0.164879	0.0501708	0.00152371	0.1034	0.012984	0.170494	0.0670917	0.00757722	0.129401	0.0187153	0.0344113	0.0102223	0.0153675	0.06058	0.0121682	0.0586244	0.0158576	0.00534109	0.0357609	0.00496914	1	0	0	0	0	0	0	0	0	0	0	0	0	1	0	0	0	0	0	0	0
chr1	59219810	59220208	0.551004	0.0468735	0.128557	0.17435	0.0889427	0.0430828	1.2787	0.403578	0.523971	0.0793979	0.0642327	1.55022	0.291318	0.545575	0.0636803	0.0295972	0.236728	0.0539769	0.620741	0.0978135	0.0602788	0.658744	0.302967	0.299389	0.0810672	0.0392396	1	0	0	0	0	0	0	0	0.477387	0.522613	0	0	0	0	0	0	1	0	0	0	0
chr1	59228662	59229060	0.514637	0	0.100784	0.0642205	0.0596127	0.0305676	1.17908	0.165347	0.293489	0	0.0185234	1.01176	0.188617	0.308549	0.0324387	0.0272473	0.194984	0.0335322	0.360165	0.0758342	0.0107565	0.528103	0.13499	0.169336	0.0638259	0.0158929	1	0	0	0	0	0	0	1	0	0	0	0	0	0	0	0	1	0	0	0	0
chr1	59229641	59230313	1.03591	0.053302	0.282165	0.0816447	0.059178	0.0313608	0.923066	0.194293	0.255296	0.000750388	0.0380542	0.849615	0.13678	0.413499	0.0385987	0.0210653	0.167614	0.029032	0.390947	0.0608699	0.0303217	0.481792	0.0769573	0.19115	0.0482224	0.0266353	1	0	1	0	0	0	0	1	0	0	0	0	0	0	0	0	1	0	0	0	0
chr1	59239726	59240593	0.167758	0.0516419	0.395684	0.134619	0.0647465	0.0296103	0.760376	0.122005	0.372779	0.0315043	0.0289182	0.806074	0.145191	0.510143	0.0463039	0.0753879	0.257567	0.0358398	0.458782	0.044795	0.0325747	0.351679	0.0464576	0.243559	0.0479129	0.0362747	0	0	1	0	0	0	0	1	0	0	0	0	0	0	0	0	1	0	0	0	0
chr1	59412009	59413055	0.221087	0.0856091	1.23495	0.27673	0.0534449	0.0244953	0.535363	0.20035	0.0352865	0.0133912	0.0372734	0.56014	0.200472	0.0398198	0.0192348	0.0243762	0.246883	0.09305	0.0304069	0.041753	0.035319	0.115799	0.0322478	0.0446107	0.0905972	0.0618822	0	0	1	1	0	0	0	0	1	0	0	0	0	0	0	0	0	1	0	0	0
chr1	59418025	59418869	0.15956	0	0.357805	0.109263	0.0461719	0.0240256	0.700522	0.116947	0.0684443	0.0507183	0.0331614	0.767663	0.104752	0.0672477	0.06029	0.0395947	0.289925	0.0327941	0.0281682	0.0449845	0.0239892	0.188014	0.0374465	0.0405835	0.0944423	0.0332116	0	0	1	0	0	0	0	0	1	0	0	0	0	0	0	0	0	1	0	0	0
chr1	59421294	59421986	0.204547	0.0905825	0.144834	0.353417	0.0892064	0.0423837	0.849113	0.181393	0.132666	0.0887396	0.081297	1.75106	0.234246	0.123094	0.0790522	0.0782338	0.265999	0.0396525	0.0520876	0.120077	0.0408268	0.317835	0.071319	0.0365785	0.262469	0.0942494	0	0	0	1	0	0	0	0	1	0	0	0	0	0	0	0	0	1	0	0	0
chr1	59433375	59433773	0.609157	0.112496	0.137013	0.104661	0.06736	0.0314807	0.55808	0.159486	0.0514414	0.172029	0.0507576	0.943413	0.191637	0.104207	0.0963546	0.0906338	0.217023	0.0467799	0.0247876	0.0869196	0.0229747	0.624877	0.14685	0.0637775	0.100321	0.0838095	1	0	0	0	0	0	0	0	0.937186	0	0	0	0	0	0.062814	0	0	1	0	0	0
chr1	59554897	59555577	0.0760018	0	0.302746	0.11269	0.0410462	0.0230539	0.868742	0.186592	0.0326314	0.0194866	0.0256612	0.722284	0.148943	0.0323464	0.0237643	0.0217468	0.395422	0.0375285	0.0301604	0.0569617	0.0289998	0.057809	0.0266813	0.0307869	0.105998	0.0515796	0	0	1	0	0	0	0	0	1	0	0	0	0	0	0	0	0	1	0	0	0
chr1	59688636	59689678	0.160517	0.0601566	0.298324	0.114585	0.075293	0.0285601	0.837755	0.203439	0.102396	0.137599	0.0454595	0.948046	0.144184	0.090075	0.148983	0.0446697	0.597502	0.0474086	0.0519033	0.079472	0.0324722	0.193469	0.0532167	0.0682717	0.176427	0.0504562	0	0	1	0	0	0	0	0	0.616123	0.383877	0	0	0	0	0	0	0	1	0	0	0
chr1	59699105	59700021	0.0590542	0	0.588689	0.0732682	0.0530795	0.0200188	0.519971	0.131625	0.122943	0.0482914	0.0166259	0.408325	0.0657269	0.621767	0.0413712	0.0241009	0.305891	0.0373507	0.376017	0.051634	0.026761	0.0469094	0.00898504	0.392615	0.0260484	0.00867855	0	0	1	0	0	0	0	0.241266	0.758734	0	0	0	0	0	0	0.322052	0.677948	0	0	0	0
chr1	59727523	59727921	1.07235	0.224993	0.0321738	0.0661281	0.036382	0.0222074	0.104387	3.64389	0.0548534	0.0483567	0.0555309	0.115884	3.00637	0.088001	0.0328508	0.0563787	0.0961742	2.5461	0.0893884	0.043658	0.066675	0.0603909	2.25594	0.0520516	0.0361008	0.03502	1	0	0	0	0	0	0	0	0	0	1	0	0	0	0	0	0	0	0	1	0
chr1	59741674	59742072	0.938367	0.292491	0.109308	0.0338272	0.0406536	0.0367331	0.145334	2.64626	0.0823451	0.027381	0.0584577	0.136646	2.13468	0.0675074	0.0346366	0.0306347	0.277134	2.05044	0.0422059	0.0774744	0.0529079	0.0559348	1.59809	0.0277902	0.0247199	0.0358667	1	0	0	0	0	0	0	0	0	0	1	0	0	0	0	0	0	0	0	1	0
chr1	59819914	59820312	0.817801	0.0899972	0.0470231	0.0164049	0.0244527	0.0232964	0.450835	2.43847	0.0429373	0.0767231	0.0331967	0.342179	1.64757	0.0347986	0.0143452	0.0164288	0.473906	1.8837	0.0233794	0.138246	0.0297709	0.112311	1.69766	0.022298	0.063472	0.0233744	1	0	0	0	0	0	0	0	0	0.718593	0.281407	0	0	0	0	0	0	0	0.718593	0.281407	0
chr1	59866565	59867213	0.0792007	0	0.311617	0.106382	0.0540018	0.0282261	0.731024	0.141178	0.0729568	0.0369635	0.0409114	0.641604	0.173749	0.162945	0.0306871	0.0784617	0.360517	0.0446861	0.0612089	0.0296942	0.0249993	0.232522	0.0599634	0.0769944	0.0326708	0.0224385	0	0	1	0	0	0	0	0	1	0	0	0	0	0	0	0	0	1	0	0	0
chr1	59885971	59887729	0.360889	0.0101874	0.779286	0.13828	0.0460519	0.0223692	0.562999	0.122429	0.0742158	0.0264369	0.0618807	0.449673	0.109622	0.143712	0.0355466	0.0796982	0.245571	0.0324871	0.0502984	0.0337116	0.0225956	0.175547	0.0463335	0.0669656	0.0325658	0.0145871	1	0	1	1	0	0	0	0	1	0	0	0	0	0	0	0	0	1	0	0	0
chr1	59950587	59951595	0.146176	0.053302	0.67372	0.0917371	0.0649638	0.0280185	1.15239	0.348739	0.0676129	0.0274031	0.0306512	1.01481	0.215452	0.0783989	0.0464672	0.0264319	0.819437	0.121948	0.0786642	0.0548172	0.0235934	0.222143	0.0422742	0.0591031	0.130923	0.0450553	0	0	1	0	0	0	0	0	0.404762	0.595238	0	0	0	0	0	0	0	1	0	0	0
chr1	59958082	59959041	0.0704811	0.0280126	0.552936	0.184352	0.0718941	0.0285914	1.30558	0.228512	0.0964326	0.104872	0.0397418	1.24816	0.179931	0.101021	0.0857762	0.0460229	0.728241	0.0611855	0.0640668	0.0718226	0.0309222	0.312682	0.0817793	0.0447943	0.165648	0.0434633	0	0	1	1	0	0	0	0	0.748697	0.251303	0	0	0	0	0	0	0	1	0	0	0
chr1	59961433	59962017	0.14966	0.0153334	0.248689	0.0935136	0.0491612	0.0222022	1.03732	0.260366	0.0697427	0.0508004	0.0454484	1.08893	0.210626	0.0823103	0.0671775	0.0385523	0.405953	0.0471581	0.0363296	0.0882068	0.0312808	0.298959	0.0580064	0.025742	0.129409	0.0341299	0	0	1	0	0	0	0	0	1	0	0	0	0	0	0	0	0	1	0	0	0
chr1	59971327	59972134	0.189453	0.0332889	0.326846	0.214622	0.0646943	0.0239373	0.51896	0.950217	0.122348	0.00906045	0.0152871	0.455124	0.670944	0.238375	0.0466204	0.0317624	0.797442	0.201356	0.0776782	0.0496086	0.0155451	0.360383	0.302888	0.108041	0.0587178	0.0119455	0	0	1	0	0	0	0	0	0	1	0	0	0	0	0	0	0	0	1	0	0
chr1	59974285	59975577	0.111066	0.00519817	0.563388	0.244724	0.0678388	0.025653	0.82206	0.174688	0.194066	0.0176717	0.0327421	1.04087	0.184086	0.32851	0.0253657	0.0185022	0.482814	0.0465817	0.0870811	0.0461993	0.0185111	0.364104	0.0963999	0.0706133	0.031331	0.0196945	0	0	1	1	0	0	0	0.309598	0.535604	0.154799	0	0	0	0	0	0	0.773994	0.226006	0	0	0
chr1	60099514	60099912	0.46293	0.0449987	0.0404235	0.0286132	0.0488604	0.0674766	0.43895	2.63213	0.0742319	0.458651	0.318001	0.747059	0.958888	0.0997715	0.390265	0.124995	0.325897	0.493121	0.0439149	1.99409	0.128791	0.347385	1.73456	0.0475618	0.49603	0.0479425	1	0	0	0	0	0	0	0	0	0	0	0	0	0	1	0	0	0	0	0	0
chr1	60400056	60400454	0.706643	0.0687479	0.0950774	0	0.0462933	0.026622	0.21452	3.56137	0.0924643	0.0448372	0.0469469	0.273092	2.60817	0.0869627	0.0508657	0.0436549	0.462531	2.4052	0.0671032	0.0807276	0.0500971	0.118507	2.19388	0.0480973	0.0312874	0.0308281	1	0	0	0	0	0	0	0	0	0	1	0	0	0	0	0	0	0	0.361809	0.638191	0
chr1	60466332	60466730	0.7207	0.0224993	0.0294239	0.0338272	0.0287356	0.0162011	0.286503	3.30212	0.0308518	0.131133	0.0577702	0.268333	2.21778	0.0405961	0.0386987	0.0440995	0.342024	2.1322	0.0184984	0.182861	0.039403	0.0944871	1.93687	0.0224491	0.0388203	0.0315777	1	0	0	0	0	0	0	0	0	1	0	0	0	0	0	0	0	0	1	0	0
chr1	60471053	60471677	0.045318	0	0.24064	0.053128	0.0683783	0.0378017	0.616634	0.0725852	0.0878818	0.0505519	0.0197077	0.477627	0.0596302	0.0989456	0.0343082	0.0242926	0.27862	0.0285875	0.0778991	0.0364683	0.0259767	0.214195	0.0309843	0.0984776	0.0264516	0.0142801	0	0	1	0	0	0	0	0	1	0	0	0	0	0	0	0	0	0.876603	0	0	0
chr1	60517498	60517896	0.595361	0	0.104152	0.0904176	0.0601057	0.0510325	0.114784	0.104957	0.340074	0.0418808	0.0261056	0.206386	0.143117	0.217677	0.0444683	0.0186941	0.117941	0.0204312	0.125278	0.0636009	0.0172654	0.422602	0.110458	0.162223	0.0324296	0.0195573	1	0	0	0	0	0	1	0	0	0	0	0	0	0	0	0	0	0.743719	0	0	0
chr1	60587432	60587830	1.09736	0	0.109652	0.0225091	0.0432211	0.103506	0.160928	0.0971424	0.0135701	0.207645	0.016618	0.146699	0.0863183	0.0125927	0.173614	0.0110937	0.0690274	0.0395829	0.104592	0.05298	0.0171405	0.362626	0.134711	0.113646	0.03228	0.0370743	1	0	0	0	0	0	0	0	0	0	0	0	1	0	0	0	0	0	0	0	0
chr1	60805802	60806200	1.50175	0	0.0888902	0.0440007	0.0460353	0.0319749	0.0862396	0.07385	0.0156278	0.212009	0.0358682	0.215031	0.0970389	0.0159769	0.288828	0.0622008	0.0782035	0.032586	0.0362995	0.0763265	0.0419516	0.218815	0.358305	0.112616	0.116461	0.0771328	1	0	0	0	0	0	0	0	0	0	0	0	1	0	0	0	0	0	0	0	0
chr1	60937054	60937971	0.049699	0	0.493521	0.0922857	0.0460679	0.0309081	0.66787	0.138292	0.061334	0.0352549	0.0392516	0.394393	0.103633	0.0490671	0.0717501	0.065323	0.0764133	0.032613	0.0242168	0.0588038	0.044159	0.0435187	0.022162	0.0512975	0.104959	0.0521109	0	0	1	0	0	0	0	0	1	0	0	0	0	0	0	0	0	1	0	0	0
chr1	62348819	62349233	0.111074	0	0.0538637	0.0393661	0.076559	0.0690083	0.0637946	0.041999	0.0140848	0.041548	0.0277027	0.0477915	0.0607005	0.00858052	0.0787835	0.02422	0.0435834	0.0325566	0.0249994	0.0401179	0.0456508	0.0360331	0.0389213	0.024921	0.0268233	0.0317584	0	0	0	0	0	1	0	0	0	0	0	0	1	0	0	0	0	0	0	0	0
chr1	62429109	62429997	0.180321	0.0504208	0.340261	0.171049	0.0767879	0.0283168	0.593043	0.175071	0.0263422	0.21563	0.0329533	0.657769	0.211248	0.0296161	0.043353	0.0343592	0.493606	0.0733713	0.0287089	0.0569193	0.026121	0.081843	0.0354825	0.0453973	0.0642886	0.110599	0	0	1	0	0	0	0	0	1	0	0	0	0	0	0	0	0	0.552928	0.447072	0	0
chr1	62454944	62455589	0.0614274	0	0.251683	0.0323299	0.0403056	0.021679	0.218673	0.0782894	0.00963512	0.353417	0.0236477	0.309336	0.0854383	0.0423296	0.140721	0.0938627	0.106412	0.018808	0.00516311	0.0540389	0.0229339	0.0564456	0.0332645	0.0437342	0.0462305	0.0817346	0	0	1	0	0	0	0	0	0	0	0	0	0	0.396899	0.603101	0	0	0.293023	0	0	0
chr1	62819324	62820652	0.0442498	0.0269721	1.34007	0.063686	0.0547265	0.0257334	0.743873	0.542825	0.0274031	0.0159691	0.0395606	0.611904	0.185129	0.038104	0.0859082	0.029117	0.427995	0.0645315	0.048568	0.0602226	0.0345285	0.189906	0.0703036	0.0810934	0.100064	0.0731933	0	0	1	0	0	0	0	0	0.207831	0.792169	0	0	0	0	0	0	0	1	0	0	0
chr1	62822358	62822912	0.0857838	0.0161637	0.0864799	0.093096	0.0979444	0.0637922	0.945056	0.107836	0.0481271	0.121717	0.0500545	0.396659	0.178154	0.0390445	0.188549	0.0461763	0.13071	0.0474235	0.0485513	0.128011	0.0405407	0.134117	0.0712694	0.074838	0.134043	0.0560314	0	0	0	0	0	1	0	0	1	0	0	0	0	0	0	0	0	1	0	0	0
chr1	62829906	62831064	0.0960846	0.0539156	0.360022	0.0760079	0.0623677	0.0298653	0.757721	0.233056	0.0487168	0.573185	0.0581618	0.311373	0.150446	0.0330862	0.35938	0.0597541	0.0912372	0.0393935	0.0565156	0.119716	0.0355613	0.0629308	0.0517539	0.116278	0.18871	0.0554441	0	0	1	0	0	0	0	0	0.055268	0	0	0	0	0	0.944732	0	0	0	0	0	0
chr1	62846712	62847642	0.148337	0.144431	0.219833	0.258401	0.159902	0.0346453	0.350505	0.115284	0.0340308	0.560108	0.0405019	0.49018	0.184713	0.0366797	0.258507	0.0524775	0.747839	0.0577605	0.0700318	0.0648375	0.0405209	0.141708	0.04667	0.0568915	0.163958	0.0833289	0	1	0	1	1	0	0	0	0	0	0	0	0.354839	0.215054	0.430108	0	0	0	0	0	0
chr1	62987886	62988385	0.0371288	0	0.09985	0.0509177	0.0789972	0.0603735	0.0713301	0.080888	0.0169623	0.0533343	0.0221377	0.0719468	0.0736242	0.0194964	0.116577	0.0310196	0.0520935	0.0354405	0.0133039	0.05571	0.037207	0.0173758	0.0221943	0.0110498	0.0530111	0.0969586	0	0	0	0	0	1	0	0	0	0	0	0	1	0	0	0	0	0	0	0	0
chr1	63223531	63223929	0.841527	0.224993	0.0462668	0.0338272	0.0336239	0.0191665	0.0697638	3.25936	0.0727992	0.0278033	0.0231395	0.0449139	1.94667	0.0673051	0.00767303	0.0284752	0.169093	2.51834	0.0738436	0.050178	0.0351804	0.027004	1.97098	0.0214193	0.0155009	0.0272887	1	0	0	0	0	0	0	0	0	0	1	0	0	0	0	0	0	0	0	1	0
chr1	63271299	63272269	0.08857	0	0.924392	0.0577101	0.0490434	0.0270298	0.555183	0.140576	0.0149992	0.102383	0.0173203	0.498451	0.0823373	0.032108	0.129242	0.0663752	0.167599	0.0273148	0.0173568	0.0953263	0.0291977	0.0592486	0.0406596	0.0224107	0.100083	0.0578864	0	0	1	0	0	0	0	0	1	0	0	0	0	0	0	0	0	0.928866	0	0	0
chr1	63464870	63465543	0.458543	0	0.324069	0.119803	0.0480639	0.0231698	0.342406	0.110149	0.0145176	0.164133	0.0338157	0.328293	0.11284	0.00764645	0.223624	0.0792906	0.185001	0.026183	0.0195911	0.0668743	0.0299737	0.0334508	0.0284131	0.0265032	0.0799859	0.0741971	1	0	1	0	0	0	0	0	1	0	0	0	0	0	0	0	0	0.787519	0	0	0
chr1	63484095	63484493	1.03882	0.188119	0.122508	0.0624404	0.0603079	0.0377467	0.328513	0.111913	0.0259551	0.302529	0.0141037	0.32923	0.0750692	0.0258597	0.250757	0.0675147	0.100721	0.0395296	0.0120588	0.0805361	0.0320821	0.374202	0.218591	0.0106822	0.0881652	0.0265391	1	0	0	0	0	0	0	0	0	0	0	0	0.263819	0	0.736181	0	0	0.233668	0	0	0
chr1	63499982	63500380	1.27364	0	0.135432	0.0353532	0.0636153	0.0259603	0.175762	0.0871174	0.0183887	0.304428	0.0347289	0.184772	0.114478	0.0280843	0.229465	0.0296185	0.20431	0.0249226	0.0178012	0.0717883	0.0417642	0.23502	0.0689787	0.0549488	0.151162	0.0937893	1	0	0	0	0	0	0	0	0	0	0	0	1	0	0	0	0	0	0	0	0
chr1	63800212	63800610	0.795235	0.0112496	0.0912276	0.0899089	0.0674832	0.0305425	0.269175	0.0949961	0.759221	0.0408956	0.0231395	0.167877	0.138864	0.688489	0.0836775	0.0224414	0.0898519	0.0361977	0.253919	0.0668536	0.0220127	0.28963	0.0425091	0.198458	0.0254542	0.0204318	1	0	0	0	0	0	1	0	0	0	0	0	0	0	0	1	0	0	0	0	0
chr1	64131296	64131694	1.17886	0	0.102502	0.0431106	0.0646693	0.0446661	0.169956	0.078852	0.0229598	0.16499	0.0494022	0.346363	0.0835752	0.0225564	0.192316	0.0599567	0.29905	0.0237364	0.055263	0.0714875	0.0230122	0.57981	0.149927	0.205062	0.0170918	0.0112153	1	0	0	0	0	0	0	0	0	0	0	0	1	0	0	0	0	1	0	0	0
chr1	64168261	64168659	2.04631	0.455611	0.12292	0.0675271	0.0331194	0.0235728	0.0976389	0.166378	0.0471829	0.555785	0.165198	0.102796	0.231801	0.0549819	0.103831	0.345301	0.411201	1.8824	0.0278502	0.466705	0.0377539	0.0614481	1.49923	0.0167647	0.0274938	0.0205012	1	1	0	0	0	0	0	0	0	0	0	0	0	1	0	0	0	0	0	0	1
chr1	64235972	64236370	1.38711	0	0.0520417	0.118141	0.0698152	0.0449509	0.168466	0.170284	0.0432759	0.488072	0.049638	0.666293	0.337421	0.0391265	0.431024	0.0568869	0.110689	0.0235499	0.0345905	0.131534	0.0575803	0.674189	0.509733	0.0668252	0.0828758	0.0212091	1	0	0	0	0	0	0	0	0	0	0	0	0.070352	0.929648	0	0	0	0	0	0	0
chr1	64548057	64548808	0.0191347	0.0119237	0.249568	0.116795	0.0557336	0.0197956	0.232432	0.0995049	0.0196009	0.0724049	0.0401618	0.322465	0.0737526	0.0236508	0.0683072	0.0675884	0.23725	0.0362549	0.0694501	0.0606023	0.0511324	0.0800082	0.0214175	0.0459003	0.0662883	0.0735381	0	0	1	0	0	0	0	0	0.809587	0	0	0	0.190413	0	0	0	0	1	0	0	0
chr1	64553160	64553612	0.0478022	0	0.0639847	0.0494938	0.0919797	0.0689159	0.149116	0.0944595	0.0290925	0.196536	0.0268784	0.0821172	0.0590542	0.0481166	0.20561	0.0571186	0.102155	0.025055	0.0363811	0.0846233	0.0247841	0.0424537	0.018966	0.0484324	0.113239	0.0379738	0	0	0	0	0	1	0	0	0	0	0	0	1	0	0	0	0	0	0	0	0
chr1	64579349	64579747	0.964285	0.378737	0.0356798	0.0378966	0.0383665	0.0131435	0.0410983	2.80308	0.0401633	0	0.0235127	0.0517948	1.95648	0.0276124	0.00753566	0.0256595	0.0608208	2.4261	0.0355886	0.0374523	0.024274	0.0247425	2.00619	0.0406555	0.0200016	0.00838371	1	0	0	0	0	0	0	0	0	0	1	0	0	0	0	0	0	0	0	1	0
chr1	64655200	64656522	0.529566	0.16934	0.806604	0.247057	0.170504	0.0294339	0.826301	0.212017	0.420726	0.047256	0.051674	0.882928	0.173817	0.546272	0.0641138	0.0337491	0.918378	0.101822	0.289944	0.0565086	0.0375399	0.219605	0.0459938	0.367674	0.060389	0.0247008	1	0	1	1	1	0	0	1	0	0	0	0	0	0	0	0	1	0	0	0	0
chr1	64663511	64663909	0.49246	0.121246	0.0582976	0.00623134	0.0595341	0.0264378	0.288175	3.6579	0.085992	0.0801722	0.0340021	0.177177	2.75811	0.105218	0.0332629	0.0413684	0.382416	2.53507	0.0826343	0.0973625	0.0339311	0.197164	2.22727	0.0504452	0.0257805	0.0184885	1	0	0	0	0	0	0	0	0	0.223618	0.776382	0	0	0	0	0	0	0	0.223618	0.776382	0
chr1	64685567	64686513	0.139644	0	0.142707	0.0956627	0.220382	0.0275323	0.411642	0.0919099	0.0185412	0.402717	0.0251066	0.535207	0.167211	0.0333877	0.263234	0.032119	0.779948	0.249407	0.0379008	0.0667083	0.0293708	0.178574	0.059596	0.0380158	0.0921255	0.0397509	0	0	0	0	1	0	0	0	0	0	0	0	0	0.330867	0.669133	0	0	0	0	0	0
chr1	64779612	64780714	0.0865305	0.0460467	0.923536	0.48386	0.226369	0.0235168	0.747987	0.527876	0.161319	0.0279383	0.0230636	0.768712	0.245172	0.145931	0.05193	0.0326875	0.925965	0.89861	0.336564	0.055754	0.0269322	0.142657	0.034538	0.0832793	0.249062	0.0532634	0	0	1	1	1	0	0	0	0	1	0	0	0	0	0	0	0	0.544465	0.455535	0	0
chr1	64817103	64817561	0.0161362	0.078207	0.0917623	0.0972489	0.0931519	0.0668845	0.129887	0.104714	0.0205065	0.385964	0.0403699	0.104873	0.110197	0.0212183	0.264684	0.0213044	0.0580382	0.0234181	0.0329105	0.0895608	0.0361952	0.233047	0.0660588	0.0210592	0.118313	0.0404316	0	0	0	0	0	1	0	0	0	0	0	0	0	1	0	0	0	0	0	0	0
chr1	64843841	64844900	0.405779	0.0338232	1.12823	0.0496099	0.0671615	0.0354182	1.62497	0.320124	0.0672791	0.0812659	0.0449143	0.982085	0.20099	0.0791078	0.180584	0.103238	0.534673	0.0454003	0.0575549	0.123593	0.0603568	0.694369	0.190187	0.0637595	0.1859	0.064983	0	0	1	0	0	0	0	0	0.472144	0.527856	0	0	0	0	0	0	0	1	0	0	0
chr1	64858248	64859433	0.084064	0.00755671	0.333418	0.0867476	0.0516382	0.0341816	0.831089	0.181038	0.0597054	0.0621521	0.0278938	0.410126	0.14243	0.0639309	0.182796	0.0438514	0.32673	0.0250358	0.0538136	0.0594838	0.0302404	0.175281	0.0294782	0.081306	0.0997674	0.0328338	0	0	1	0	0	0	0	0	1	0	0	0	0	0	0	0	0	0.803376	0	0	0
chr1	64898812	64899210	0.66809	0	0.0591915	0.115216	0.0830226	0.072394	1.11905	0.193921	0.195034	0.0833395	0.0760971	0.570635	0.22327	0.108697	0.190158	0.0514882	0.230569	0.0478194	0.103047	0.0733056	0.0492975	0.742419	0.175561	0.146626	0.0660967	0.0420573	1	0	0	0	0	0	0	0	1	0	0	0	0	0	0	0	0	0.974874	0	0	0
chr1	64952489	64953351	0.201775	0	0.529739	0.134343	0.0584752	0.0282504	0.566776	0.0805362	0.0394453	0.0626914	0.0253312	0.287212	0.107642	0.0747763	0.129343	0.038895	0.213149	0.0250881	0.0611632	0.0683491	0.0197851	0.243846	0.0501001	0.0724795	0.068243	0.0298841	0	0	1	0	0	0	0	0	1	0	0	0	0	0	0	0	0	0	0	0	0
chr1	65003096	65003494	0.515668	0.0899972	0.0508041	0.0784637	0.0372117	0.029688	0.291853	3.16185	0.0356443	0.158021	0.0450022	0.240552	2.20172	0.0421197	0.0636214	0.0586017	0.426604	2.09403	0.0319929	0.14277	0.0572308	0.200242	1.85028	0.0327056	0.0912921	0.0190577	1	0	0	0	0	0	0	0	0	0.236181	0.763819	0	0	0	0	0	0	0	0.738693	0.261307	0
chr1	65216267	65217117	0.0914138	0.010535	0.285235	0.0811006	0.0464392	0.0246915	0.634145	0.174153	0.286278	0.0262677	0.0417385	0.704993	0.105439	0.391244	0.0385558	0.00925878	0.148389	0.0220912	0.161479	0.0668307	0.031752	0.202589	0.04851	0.657066	0.0502081	0.0144413	0	0	1	0	0	0	0	0.627059	0.372941	0	0	0	0	0	0	0	1	0	0	0	0
chr1	65225442	65225840	0.64578	0.213743	0.0516291	0.0386596	0.0297783	0.0244189	0.276958	2.98472	0.0383662	0.0168932	0.0300538	0.215051	1.80783	0.0493733	0.0164646	0.0159207	0.526233	2.08178	0.0191957	0.0371517	0.021463	0.114372	2.07775	0.0358224	0.0197841	0.0200431	1	0	0	0	0	0	0	0	0	0.100503	0.899498	0	0	0	0	0	0	0	0.100503	0.899498	0
chr1	65233157	65233555	0.586205	0.246242	0.025849	0.0338272	0.035799	0.0212189	0.0596412	3.02794	0.0490842	0.0407547	0.0400718	0.0619277	2.24184	0.0405018	0.0269439	0.0242409	0.172862	2.14653	0.0154905	0.0519276	0.0258356	0.0690353	1.82269	0.0411909	0.012224	0.0199321	1	0	0	0	0	0	0	0	0	0	1	0	0	0	0	0	0	0	0	1	0
chr1	65609280	65609628	0.128158	0	0.157092	0.298009	0.10576	0.0520897	0.145182	0.168013	0.0352697	0.275315	0.0868282	0.142173	0.357523	0.0592737	0.224773	0.11431	0.0604545	0.0647803	0.041343	0.149401	0.158225	0.165117	0.340151	0.033102	0.101936	0.197718	0	0	0	1	0	0	0	0	0	0	0	0	1	0	0	0	0	0	0	0	0
chr1	66549956	66550354	0.483562	0.179994	0.187061	0.0836779	0.0896937	0.0520714	0.159286	0.151564	0.0476386	0.350041	0.0774917	0.18727	0.217055	0.0462588	0.26993	0.0427657	0.107358	0.0427682	0.0342624	0.115515	0.163821	0.124876	0.156117	0.0325957	0.0903407	0.171935	1	0	0	0	0	0	0	0	0	0	0	0	1	0	0	0	0	0	0	0	0
chr1	66747391	66747789	0.579241	0.0456236	0.0632476	0.00381509	0.0344424	0.0194262	0.195278	3.51599	0.0439922	0.0220315	0.0507379	0.158875	2.96753	0.101645	0.0266888	0.062095	0.255804	2.39763	0.0773708	0.0598554	0.0456245	0.101352	2.14496	0.0534246	0.0290846	0.0435008	1	0	0	0	0	0	0	0	0	0	1	0	0	0	0	0	0	0	0	1	0
chr1	66751044	66751879	0.0462206	0.0857937	0.291966	0.154568	0.05561	0.0284252	0.705232	0.146337	0.435458	0.00821982	0.0252983	0.83237	0.164934	0.459703	0.0413624	0.0420499	0.250736	0.0391889	0.230538	0.0531963	0.0132196	0.212326	0.0867579	0.193148	0.0397487	0.00866695	0	0	1	0	0	0	0	1	0	0	0	0	0	0	0	0	1	0	0	0	0
chr1	66862503	66862901	1.20452	0	0.152206	0.0470528	0.060543	0.0398745	0.333073	1.38112	0.0237152	0	0.0325288	0.537619	0.687174	0.0558179	0.0421134	0.00916711	0.610197	1.64782	0.0338796	0.0290051	0.0284092	0.199894	1.4368	0.0345043	0.02404	0.0195435	1	0	0	0	0	0	0	0	0	0.746231	0.253769	0	0	0	0	0	0	0	1	0	0
chr1	67006694	67007113	0.131551	0	0.130995	0.0366012	0.100907	0.0632434	0.122746	0.113788	0.0427151	0.271587	0.0544083	0.159746	0.12667	0.0227962	0.21472	0.0334833	0.0880204	0.0126596	0.021844	0.0804208	0.0949113	0.0760745	0.0631856	0.0435999	0.122326	0.153245	0	0	0	0	0	1	0	0	0	0	0	0	1	0	0	0	0	0	0	0	0
chr1	67068939	67070148	0.0764098	0.0296269	1.41956	0.0903007	0.0648411	0.0261346	0.853547	0.162384	0.149953	0.0428675	0.025135	0.705849	0.129843	0.47996	0.047082	0.0378862	0.292297	0.0324098	0.14143	0.040799	0.0257207	0.217197	0.0484623	0.217456	0.0588131	0.0210008	0	0	1	0	0	0	0	0.050455	0.949545	0	0	0	0	0	0	0	1	0	0	0	0
chr1	68550851	68551236	0.156365	0	0.0555046	0.244654	0.0401719	0.0358259	0.10147	0.103619	0.012884	0.0695634	0.175832	0.134392	0.0901955	0.0209347	0.0565798	0.0658112	0.028995	0.0156376	0.0247483	0.0423485	0.0841793	0.0334906	0.060663	0.0172456	0.0506032	0.0636235	0	0	0	1	0	0	0	0	0	0	0	0.093506	0.906493	0	0	0	0	0	0	0	0
chr1	69431305	69431746	0.15513	0	0.0418176	0.0134281	0.100477	0.0653955	0.162355	0.0591124	0.046167	0.218971	0.0369623	0.158237	0.0824669	0.0402882	0.0923791	0.0420733	0.0597089	0.0307077	0.0316003	0.0853648	0.0271837	0.0478361	0.0287759	0.0227756	0.0563875	0.0422783	0	0	0	0	0	1	0	0	0.21542	0	0	0	0.78458	0	0	0	0	0.21542	0	0	0
chr1	69541928	69543434	0.368933	0.225949	1.72028	0.404203	0.0599531	0.0400925	1.15494	0.220733	0.0504003	0.0420033	0.023812	1.04759	0.182249	0.0618526	0.0481693	0.0290494	0.377837	0.0318826	0.0344702	0.068898	0.0312167	0.327777	0.077275	0.0712838	0.0572653	0.0238619	1	1	1	1	0	0	0	0	0.734396	0.265604	0	0	0	0	0	0	0	1	0	0	0
chr1	69553723	69554995	0.858515	0.0422392	1.15654	0.11774	0.0560237	0.0288741	0.908251	0.186073	0.0611593	0.00684946	0.0592674	0.818685	0.180295	0.138704	0.0603218	0.0953373	0.37971	0.0358963	0.030493	0.0698925	0.0287075	0.143057	0.0310819	0.101543	0.0673062	0.0527854	1	0	1	0	0	0	0	0	1	0	0	0	0	0	0	0	0	1	0	0	0
chr1	69559747	69561201	1.03389	0.0554282	1.76571	0.0974326	0.0738665	0.0273144	0.778779	0.350233	0.0424531	0.0216563	0.0209266	0.923115	0.168722	0.0523912	0.0441443	0.0297985	0.755013	0.0517779	0.041122	0.0468362	0.0191468	0.402571	0.133496	0.0534628	0.0594619	0.0211172	1	0	1	0	0	0	0	0	0.275791	0.724209	0	0	0	0	0	0	0	1	0	0	0
chr1	69562340	69563340	0.135182	0	0.562441	0.0548651	0.078277	0.0252554	0.775524	0.15137	0.0376405	0.013447	0.0102649	0.665948	0.139152	0.0674516	0.0298826	0.0295925	0.687497	0.0569479	0.0309786	0.0389135	0.0177707	0.191028	0.0361708	0.0609474	0.0452475	0.014844	0	0	1	0	0	0	0	0	1	0	0	0	0	0	0	0	0	1	0	0	0
chr1	69591686	69592368	0.158256	0.0787806	0.296923	0.115476	0.1336	0.0308814	1.00431	0.180682	0.195389	0.0380373	0.0375765	1.49545	0.250355	0.118935	0.0473892	0.0559064	1.19713	0.133807	0.0787905	0.0602563	0.0307593	0.246981	0.0581265	0.153924	0.0757642	0.0453937	0	0	1	0	0	0	0	0	1	0	0	0	0	0	0	0	0	1	0	0	0
chr1	69605904	69606995	0.188071	0.164156	0.772539	0.196006	0.163194	0.0358493	1.08596	0.174958	0.201276	0.0180515	0.0752986	1.15914	0.217376	0.107641	0.0338188	0.0561638	1.06509	0.113415	0.0854133	0.0389737	0.0336388	0.245785	0.0573232	0.161796	0.0554318	0.0317486	0	1	1	1	1	0	0	0	0.912007	0.087993	0	0	0	0	0	0	0	1	0	0	0
chr1	69676797	69677566	0.0876945	0.0232893	0.367368	0.095896	0.0603248	0.0285106	0.932589	0.189563	0.0776134	0.0571583	0.0362735	0.694151	0.178294	0.0692986	0.0555463	0.0195148	0.277281	0.0282395	0.0310428	0.0722502	0.0368681	0.13566	0.0350671	0.0677575	0.100374	0.0378659	0	0	1	0	0	0	0	0	1	0	0	0	0	0	0	0	0	1	0	0	0
chr1	69701563	69701961	0.508836	0.0674979	0.223566	0.0366249	0.0596238	0.0169215	0.973684	0.149932	0.0952384	0.0689101	0.0286592	0.866986	0.170925	0.064555	0.0614628	0.0554896	0.123184	0.0306534	0.0312819	0.0885598	0.0290838	0.49398	0.334427	0.0670591	0.014114	0.018905	1	0	0	0	0	0	0	0	1	0	0	0	0	0	0	0	0	1	0	0	0
chr1	69792940	69794099	0.136962	0.030905	0.715906	0.226211	0.0875165	0.0284213	0.809179	0.210341	0.0299812	0.0865332	0.0281283	0.848755	0.185101	0.0545172	0.0303521	0.0413817	0.617909	0.0596112	0.0463163	0.045089	0.0271649	0.343061	0.086163	0.0533217	0.0396424	0.0318068	0	0	1	1	0	0	0	0	1	0	0	0	0	0	0	0	0	1	0	0	0
chr1	70365133	70365783	0.11054	0.0137765	0.212409	0.0285772	0.0614489	0.0281496	0.0635077	0.0915288	0.021283	0.142615	0.0226359	0.0581106	0.100406	0.0257902	0.174377	0.0442824	0.0393647	0.0294516	0.0117537	0.057917	0.0526673	0.0283745	0.0276976	0.0290973	0.0559237	0.0705588	0	0	1	0	0	0	0	0	0	0	0	0	1	0	0	0	0	0	0	0	0
chr1	70945447	70946297	0.0945532	0	0.299367	0.066036	0.0588072	0.028257	0.661744	0.12343	0.0279466	0.257668	0.0505774	0.355342	0.133353	0.0347975	0.142572	0.0524699	0.306785	0.0376861	0.0447229	0.108266	0.0403979	0.0682647	0.0373864	0.0373847	0.0859513	0.100927	0	0	1	0	0	0	0	0	0.650588	0	0	0	0	0	0.349412	0	0	0.82	0	0	0
chr1	70948437	70949718	0.156049	0.0489328	2.29016	0.0988959	0.219093	0.0281168	0.460601	0.0887579	0.0154687	0.0502774	0.0664554	0.443397	0.11292	0.0658799	0.053868	0.140014	0.59461	0.0830438	0.0420284	0.0570684	0.0452934	0.0807778	0.0375896	0.0320756	0.0504503	0.0698633	0	0	1	0	1	0	0	0	1	0	0	0	0	0	0	0	0	0.624512	0	0	0
chr1	70964620	70965456	0.207007	0.0345145	0.257675	0.116908	0.108664	0.0313583	0.960758	0.124219	0.0213156	0.139	0.0314494	0.837769	0.149125	0.0869868	0.0801691	0.084856	0.85547	0.200437	0.0579103	0.0562823	0.0397005	0.437924	0.109666	0.0703608	0.052253	0.0755174	0	0	1	0	0	0	0	0	1	0	0	0	0	0	0	0	0	1	0	0	0
chr1	71052565	71053159	0.0966825	0.0150753	0.249063	0.105573	0.0425267	0.022951	0.489092	0.135011	0.0236735	0.0322119	0.0299161	0.364301	0.122063	0.0394597	0.0647186	0.0811545	0.0589045	0.0217087	0.026603	0.0637064	0.0446914	0.181115	0.0462344	0.0625398	0.0202621	0.0334066	0	0	1	0	0	0	0	0	1	0	0	0	0	0	0	0	0	1	0	0	0
chr1	71091477	71092314	0.250049	0.0213972	0.592014	0.056298	0.0602646	0.0232347	0.69327	0.143936	0.173281	0.00498706	0.0172704	0.644885	0.142581	0.643924	0.0346102	0.0794793	0.201659	0.0225738	0.627652	0.0414544	0.019081	0.382609	0.0574317	0.165187	0.0296384	0.0233317	1	0	1	0	0	0	0	0.375149	0.624851	0	0	0	0	0	0	0	1	0	0	0	0
chr1	71115096	71115906	0.0721044	0	0.512031	0.060549	0.0479778	0.0230584	0.587792	0.13808	0.171955	0.00830059	0.0247182	0.52438	0.119486	0.392499	0.0580477	0.14288	0.332764	0.0356965	0.350414	0.0330103	0.0273718	0.364367	0.0648462	0.0993017	0.0118724	0.00996429	0	0	1	0	0	0	0	0	1	0	0	0	0	0	0	0.130864	0.869136	0	0	0	0
chr1	71117142	71118030	0.139286	0	0.402164	0.172018	0.074783	0.0247951	0.533232	0.108872	0.430551	0.0153954	0.0317471	0.647575	0.121511	0.599289	0.0507236	0.0541435	0.470545	0.0551826	0.515179	0.0435029	0.0338089	0.217227	0.0349558	0.19634	0.0394849	0.019329	0	0	1	0	0	0	0	1	0	0	0	0	0	0	0	0	1	0	0	0	0
chr1	71148788	71149186	0.6815	0.178744	0.0639349	0.0670184	0.0513834	0.0338598	0.228412	3.45242	0.0890133	0.0632086	0.0571023	0.140671	2.67028	0.0892416	0.0360691	0.0417495	0.178106	2.52867	0.131444	0.0922091	0.0769069	0.12121	2.05766	0.0401063	0.0378141	0.0368383	1	0	0	0	0	0	0	0	0	0	1	0	0	0	0	0	0	0	0	1	0
chr1	71152065	71152893	0.126259	0.0108149	0.269285	0.0465792	0.0432861	0.0219652	0.729897	0.29744	0.0330399	0.0143118	0.0542533	0.796595	0.201964	0.0993953	0.045872	0.0548104	0.60442	0.0621021	0.0915791	0.0523977	0.0463234	0.187344	0.0367377	0.101789	0.057117	0.0561175	0	0	1	0	0	0	0	0	0.163043	0.836957	0	0	0	0	0	0	0	1	0	0	0
chr1	71274133	71274877	0.143412	0	0.348492	0.0542871	0.0532713	0.0217474	0.389216	0.0863963	0.00672983	0.171664	0.0970728	0.148158	0.0774755	0.0305087	0.106007	0.0809428	0.0452169	0.026857	0.0231411	0.0427023	0.0814137	0.0352981	0.030238	0.0338897	0.0539573	0.100211	0	0	1	0	0	0	0	0	0.806452	0	0	0	0.193548	0	0	0	0	0	0	0	0
chr1	71525572	71526104	0.143837	0	0.0893361	0.0567024	0.0894634	0.0703973	0.0837569	0.090084	0.018833	0.122853	0.0294348	0.0705844	0.0922898	0.00998573	0.12573	0.0383293	0.0531528	0.0234111	0.0312478	0.0657111	0.052545	0.0365001	0.0427046	0.0358079	0.0597731	0.0923772	0	0	0	0	0	1	0	0	0	0	0	0	1	0	0	0	0	0	0	0	0
chr1	71596711	71597335	0.212443	0.00398624	0.12374	0.0593738	0.0902032	0.0668518	0.151502	0.0736944	0.0457435	0.440735	0.0407183	0.313422	0.117848	0.0288169	0.264802	0.0465057	0.0834731	0.0247028	0.0327189	0.0768858	0.0422878	0.549639	0.12243	0.0657421	0.0477256	0.0352798	0	0	0	0	0	1	0	0	0	0	0	0	0	1	0	0	0	0	0	0	0
chr1	71603710	71604108	0.999748	0.0737476	0.0784405	0.0817703	0.0544663	0.034756	0.25574	3.51384	0.109564	0.0171747	0.0293271	0.49209	2.61466	0.116597	0.0440758	0.0229072	0.81966	2.25499	0.0831676	0.0913343	0.0539824	0.197164	2.10188	0.0695854	0.0303492	0.0448472	1	0	0	0	0	0	0	0	0	0	1	0	0	0	0	0	0	0	0.728643	0.271357	0
chr1	72272805	72273203	1.34198	0.0449987	0.12677	0.142048	0.053166	0.0311791	0.162721	0.328203	0.0131273	0.20124	0.0387753	0.238788	0.22946	0.0377378	0.155462	0.056167	0.320298	0.264153	0.0144515	0.240297	0.0447375	0.250503	0.686079	0.0212683	0.092217	0.0199044	1	0	0	0	0	0	0	0	0	0	0	0	0.51005	0	0.48995	0	0	0.51005	0	0	0
chr1	72290769	72291167	1.71503	0.0531234	0.0881342	0.115216	0.066037	0.0362303	0.191022	0.317383	0.0161096	0.0436407	0.0288556	0.328694	0.274986	0.0179588	0.059206	0.0331752	0.525782	0.491882	0.0266333	0.106411	0.0392781	0.202516	0.93669	0.0244399	0.0410231	0.0168368	1	0	0	0	0	0	0	0	0.922111	0.077889	0	0	0	0	0	0	0	0.922111	0.077889	0	0
chr1	72301653	72302051	1.7416	0.384988	0.220748	0.190754	0.0718	0.0371269	0.281669	0.255383	0.0348369	0.0345607	0.0311342	0.539939	0.276345	0.0346099	0.0523572	0.0430833	0.364131	0.226289	0.0276451	0.107928	0.0566436	0.322964	0.767601	0.0409713	0.0665318	0.0248458	1	0	0	0	0	0	0	0	1	0	0	0	0	0	0	0	0	1	0	0	0
chr1	72473279	72473715	0.0887543	0.0205383	0.106433	0.0730182	0.0931345	0.0689519	0.0881301	0.0944962	0.0173566	0.084429	0.0208179	0.0725862	0.137007	0.0201597	0.178242	0.0289116	0.0537497	0.0427027	0.0184088	0.0734422	0.0333116	0.0382582	0.0552037	0.0257441	0.0636993	0.0515185	0	0	0	0	0	1	0	0	0	0	0	0	1	0	0	0	0	0	0	0	0
chr1	72611027	72611666	0.14987	0	0.236876	0.124039	0.0501674	0.0248201	0.451373	0.141615	0.0119644	0.165807	0.0336574	0.542323	0.126242	0.0491008	0.12801	0.104832	0.113867	0.0287881	0.0236991	0.0856036	0.0557685	0.16816	0.0343541	0.0354391	0.101764	0.077825	0	0	1	0	0	0	0	0	0.896714	0	0	0	0.103286	0	0	0	0	0.896714	0	0	0
chr1	72757604	72758002	1.02554	0.213743	0.0999587	0.103135	0.0467306	0.0365824	0.375965	2.17776	0.0580831	0.18491	0.083601	0.254948	1.73655	0.0945535	0.0822053	0.084642	0.297589	2.38968	0.065394	0.073415	0.0768323	0.158611	2.00315	0.0498136	0.0450615	0.0761196	1	0	0	0	0	0	0	0	0	0.492462	0.507538	0	0	0	0	0	0	0	0.492462	0.507538	0
chr1	72797687	72798767	0.164373	0.0165828	0.125255	0.110647	0.199219	0.0323988	0.120223	0.121811	0.0257385	0.314931	0.0256037	0.160956	0.189561	0.0353366	0.442908	0.0728625	0.918927	0.136013	0.0815673	0.0815115	0.0427565	0.0731219	0.0728137	0.0381869	0.10159	0.106579	0	0	0	0	1	0	0	0	0	0	0	0	1	0	0	0	0	0	0	0	0
chr1	73032662	73034036	0.118444	0	0.954843	0.100527	0.0526703	0.0326537	0.624022	0.165333	0.039753	0.0148228	0.0246487	0.700806	0.119076	0.0589721	0.068071	0.0650172	0.204394	0.032498	0.0245066	0.105624	0.0502433	0.0492351	0.0421407	0.0281347	0.0474097	0.0883135	0	0	1	0	0	0	0	0	1	0	0	0	0	0	0	0	0	1	0	0	0
chr1	73048870	73049936	0.0408747	0.0672024	0.659035	0.179142	0.177105	0.0327117	1.0085	0.212485	0.0311625	0.0798649	0.0211362	0.974911	0.221074	0.0663059	0.064227	0.0454662	1.04134	0.216659	0.0811989	0.0864708	0.0479824	0.0498412	0.059002	0.0327008	0.0716876	0.143815	0	0	1	0	1	0	0	0	1	0	0	0	0	0	0	0	0	1	0	0	0
chr1	73083973	73085851	0.162957	0.0238411	0.98335	0.288616	0.14489	0.036385	1.59781	0.341407	0.0877004	0.0286409	0.0393227	1.75226	0.214841	0.113611	0.0488794	0.0320758	1.55854	0.190254	0.181173	0.0669417	0.0405906	0.0946261	0.0863399	0.0356309	0.121545	0.171326	0	0	1	1	1	0	0	0	0.653355	0.346645	0	0	0	0	0	0	0	1	0	0	0
chr1	73093332	73094127	0.0839875	0	0.330263	0.198252	0.0887231	0.018528	1.0359	0.0991349	0.0737058	0.0451756	0.0498577	1.24454	0.196338	0.0975075	0.0645267	0.0568312	0.970492	0.0717057	0.0655311	0.064276	0.0467076	0.0639571	0.0557716	0.0385551	0.0670032	0.109869	0	0	1	0	0	0	0	0	1	0	0	0	0	0	0	0	0	1	0	0	0
chr1	73116688	73117816	0.126303	0.00793858	0.433369	0.155161	0.0597461	0.0374666	1.36747	0.180505	0.0414611	0.0953437	0.039152	1.20811	0.159731	0.0621	0.0731394	0.0395759	0.640279	0.0426279	0.0652982	0.291266	0.0487172	0.0589386	0.0498306	0.0299878	0.0772898	0.151416	0	0	1	0	0	0	0	0	1	0	0	0	0	0	0	0	0	0.900709	0	0	0
chr1	73118226	73120350	0.128571	0.126479	1.47463	0.253068	0.209688	0.0337578	1.29443	0.234545	0.0572786	0.0429451	0.0534336	0.919973	0.143821	0.0691628	0.0744636	0.0358031	1.16541	0.128482	0.137929	0.111826	0.0471308	0.0562725	0.0511975	0.0360503	0.0809849	0.165309	0	1	1	1	1	0	0	0	0.623352	0.376648	0	0	0	0	0	0	0	1	0	0	0
chr1	74044325	74044950	0.167844	0.0998949	0.119821	0.0689154	0.0950426	0.0733382	0.184226	0.126496	0.0473953	0.153788	0.0515733	0.0808157	0.156313	0.0297066	0.191748	0.0333135	0.309705	0.065978	0.325777	0.0544103	0.0271841	0.50461	0.187166	0.0978481	0.107204	0.0241923	0	0	0	0	0	1	0	0	0	0	0	0	1	0	0	0	0	0	0	0	0
chr1	74048047	74048445	0.481241	0.134996	0.165062	0.076429	0.0753314	0.029688	0.255375	0.192504	0.0411661	0.287818	0.0623862	0.389115	0.190228	0.0441555	0.2631	0.0511495	1.02616	0.979407	0.185572	0.0574361	0.0356926	0.656833	0.374077	0.0776173	0.135497	0.025512	1	0	0	0	0	0	0	0	1	0	0	0	0	0	0	0	0	0	0	0	0
chr1	74077620	74078018	0.542233	0.118746	0.196686	0.0554461	0.0639741	0.024176	0.156398	0.136064	0.0308518	0.329277	0.04182	0.459094	0.207365	0.0331672	0.274326	0.051467	0.158988	0.0525507	0.0503272	0.154648	0.0551191	0.433107	0.0569249	0.0642715	0.493515	0.0598382	1	0	0	0	0	0	0	0	0	0	0	0	0	1	0	0	0	0	0	0	0
chr1	74081291	74081689	0.818833	0.0449987	0.108071	0.0727413	0.07865	0.076976	0.156247	0.0973791	0.0307476	0.588095	0.0429396	0.0793186	0.176537	0.0339896	0.315909	0.0368378	0.147149	0.0533902	0.057642	0.347692	0.0477858	0.68163	0.143264	0.0632693	0.331271	0.0754948	1	0	0	0	0	0	0	0	0	0	0	0	0	1	0	0	0	0	0	0	0
chr1	74219278	74219676	1.03482	0	0.111646	0.0649838	0.0569893	0.0586138	0.0918937	0.0844766	0.0184278	0.425496	0.0432736	1.28956	0.169391	0.0624917	0.25221	0.11769	0.245003	0.0329058	0.0411532	0.0892431	0.0306829	0.63007	0.30247	0.0578735	0.047509	0.0254426	1	0	0	0	0	0	0	0	0	0	0	0	0	1	0	0	0	1	0	0	0
chr1	74278844	74279242	0.433014	0	0.194142	0.101482	0.082832	0.0395897	0.237866	0.101286	0.0672905	0.372002	0.0497558	0.407319	0.125376	0.0907785	0.280115	0.0573315	0.263547	0.0416354	0.0591047	0.0568072	0.0397403	0.292119	0.0753146	0.0879013	0.0607391	0.0272609	1	0	0	0	0	0	0	0	0.894472	0	0	0	0.105528	0	0	0	0	0.39196	0	0	0
chr1	74282969	74283367	1.05816	0.0224993	0.0659287	0.0259426	0.03146	0.0170137	0.13287	3.00776	0.0623416	0.0370243	0.0494415	0.154453	2.3844	0.0579214	0.0182504	0.023627	0.0952867	2.23864	0.0441337	0.0274469	0.0265227	0.0436506	1.87305	0.0162842	0.0176085	0.0131169	1	0	0	0	0	0	0	0	0	0.077889	0.922111	0	0	0	0	0	0	0	0.077889	0.922111	0
chr1	74325504	74325902	0.718124	0.0668729	0.0361611	0.0745214	0.102251	0.0342116	1.16106	0.34482	1.31758	0.441828	0.12876	0.983939	0.371068	0.978418	0.196281	0.0731886	0.282023	0.0957186	0.438275	0.153869	0.0706354	0.424891	0.158952	0.526928	0.188975	0.0537445	1	0	0	0	0	0	0	0	0	1	0	0	0	0	0	0	0	0	1	0	0
chr1	74341556	74342738	0.453562	0.335444	0.500654	0.391848	0.133721	0.0573105	1.81286	1.02686	0.502232	0.103644	0.0634628	1.70876	1.03267	0.354388	0.0540913	0.0478193	1.47774	0.960544	0.285127	0.079978	0.0372033	0.920329	0.859682	0.221323	0.0450474	0.0200503	1	1	1	1	0	0	0	0.037225	0	0.962775	0	0	0	0	0	0	0.037225	0	0.962775	0	0
chr1	74350486	74350884	0.807614	0.0449987	0.11687	0.0338272	0.0434342	0.0194765	0.560056	3.41337	0.0912141	0.326672	0.0354949	0.383484	2.19717	0.150789	0.0516703	0.057395	0.573317	2.35776	0.0455829	0.167483	0.0441878	0.0936307	2.20522	0.0703264	0.0302132	0.0244293	1	0	0	0	0	0	0	0	0	1	0	0	0	0	0	0	0	0	1	0	0
chr1	74377569	74378684	0.351107	0.136529	0.344557	0.2966	0.0883969	0.0429328	1.59832	0.267103	0.0902666	0.153037	0.0709503	1.90737	0.298305	0.0634834	0.087792	0.0471787	1.09383	0.0777055	0.078563	0.0835445	0.0640368	0.791768	0.216703	0.0597976	0.0814671	0.0243914	0	0	1	1	0	0	0	0	1	0	0	0	0	0	0	0	0	0.386547	0.613453	0	0
chr1	74419991	74420389	0.574212	0	0.115152	0.135309	0.0683466	0.0716652	0.231117	0.123935	0.0155105	0.503275	0.0622881	0.384098	0.156808	0.0447083	0.532088	0.0694837	0.113489	0.0309734	0.0488506	0.16792	0.0198764	0.52738	0.11511	0.0516671	0.181225	0.04847	1	0	0	0	0	0	0	0	0	0	0	0	0	1	0	0	0	0	0	0	0
chr1	74444012	74444410	0.57705	0.0712477	0.100234	0.0860942	0.0741654	0.0403772	0.74512	1.79413	0.0938057	0.0710218	0.0346699	0.428933	1.15852	0.0801542	0.0543196	0.0199009	0.695328	1.98532	0.088213	0.0418947	0.0137299	0.221933	1.48965	0.0375249	0.023197	0.0263587	1	0	0	0	0	0	0	0	0	1	0	0	0	0	0	0	0	0	1	0	0
chr1	74444552	74444950	0.619734	0.0899972	0.104496	0.0587522	0.040833	0.0346053	0.905683	0.580388	0.252935	0.0770046	0.27787	0.802483	0.575539	0.13128	0.068861	0.145255	1.21506	1.14525	0.191957	0.111168	0.185784	0.43035	1.05564	0.0519967	0.0427635	0.0619894	1	0	0	0	0	0	0	0	0.376884	0.623116	0	0	0	0	0	0	0	0.376884	0.623116	0	0
chr1	74448539	74449418	0.12886	0.0407497	0.331202	0.271551	0.0609384	0.0258872	0.997333	0.178146	0.0580001	0.069606	0.0440703	1.22731	0.225011	0.105441	0.0360398	0.0405872	0.735105	0.0655839	0.0986036	0.103178	0.0344605	0.337704	0.0701064	0.0367668	0.091205	0.0309025	0	0	1	1	0	0	0	0	1	0	0	0	0	0	0	0	0	0.703072	0.296928	0	0
chr1	74482324	74482369	0.298808	0.818086	0.102757	0.362168	0.135455	0.0303027	1.4545	0.240759	0.829086	0.113303	0.0793957	1.17698	0.300256	0.695444	0.11004	0.0106731	0.963285	0.141332	0.707882	0.0720517	0.062208	0.415062	0.140359	0.353139	0.0725172	0.060768	0	1	0	0	0	0	0	1	0	0	0	0	0	0	0	0	1	0	0	0	0
chr1	74552778	74553176	1.11142	0.244992	0.0923276	0.00546829	0.0350926	0.0212105	0.241118	3.48506	0.101111	0.0479345	0.0493237	0.204086	2.63037	0.092531	0.0277289	0.0287293	0.25676	2.5195	0.0978515	0.0465694	0.0602037	0.182765	2.19139	0.0466144	0.0263516	0.0353253	1	0	0	0	0	0	0	0	0	0	1	0	0	0	0	0	0	0	0	1	0
chr1	74556926	74557841	0.0415063	0	0.377768	0.186579	0.0485338	0.0214617	0.471457	0.0791022	0.202105	0.0334645	0.0179342	0.553279	0.0941279	0.382927	0.0328549	0.0606865	0.372827	0.0477105	0.297249	0.0290796	0.0213724	0.119666	0.0373547	0.19459	0.0199968	0.0121777	0	0	1	1	0	0	0	0.344262	0.655738	0	0	0	0	0	0	0	1	0	0	0	0
chr1	74712358	74712957	0.110698	0	0.109172	0.0801876	0.0876214	0.0539401	0.761577	0.126281	0.568178	0.049575	0.0241194	0.695709	0.102233	0.438791	0.0420771	0.00862303	0.376553	0.0482176	0.218124	0.0601051	0.0288953	0.201867	0.0324948	0.164186	0.0383248	0.0155309	0	0	0	0	0	1	0	1	0	0	0	0	0	0	0	0	1	0	0	0	0
chr1	74719354	74719915	0.162657	0	0.206796	0.311891	0.0784992	0.0390339	0.46082	0.165189	1.21235	0.143219	0.0612056	1.2167	0.182893	0.742268	0.0714771	0.0413045	0.532319	0.055086	0.488243	0.0881578	0.0394499	0.662009	0.201824	0.228922	0.0661562	0.054505	0	0	0	1	0	0	0.204991	0.795009	0	0	0	0	0	0	0	0	1	0	0	0	0
chr1	75045435	75046454	0.0957438	0	0.48198	0.0915417	0.0695483	0.0325323	0.481078	0.0858785	0.0237339	0.180156	0.0474139	0.458558	0.119789	0.0263459	0.260372	0.0470176	0.0679643	0.0387912	0.0293276	0.0841065	0.0294771	0.0584326	0.0341999	0.029034	0.142038	0.0267219	0	0	1	0	0	0	0	0	1	0	0	0	0	0	0	0	0	0.392542	0	0	0
chr1	75132915	75134400	0.156627	0.427469	1.25185	0.683435	0.238092	0.0312883	1.35281	0.849819	0.89809	0.087175	0.0345989	1.5571	0.402256	1.38201	0.0742173	0.0343854	1.43242	0.552754	1.23815	0.0811552	0.0447031	0.257646	0.0822768	0.913266	0.0756733	0.0141587	0	1	1	1	1	0	0	0	0	1	0	0	0	0	0	0	1	0	0	0	0
chr1	75134779	75135620	0.125162	0	0.728249	0.22099	0.14544	0.026926	0.797363	0.284816	0.611847	0.0356426	0.0353247	0.682752	0.264595	0.933928	0.0845125	0.0302478	0.923698	0.269943	0.865065	0.0522217	0.0250503	0.200426	0.0680742	0.668585	0.0558485	0.0118173	0	0	1	1	1	0	0	0.951249	0	0.048751	0	0	0	0	0	0	0.976219	0	0.023781	0	0
chr1	75138094	75138492	0.697877	0.183119	0.0675099	0.0485788	0.0721588	0.0272168	0.416029	3.51799	0.15047	0.0548325	0.0478897	0.292566	2.55907	0.309763	0.0185841	0.0407333	0.390951	2.33767	0.224428	0.0621244	0.0454122	0.0949552	2.06487	0.0722625	0.0190771	0.0231801	1	0	0	0	0	0	0	0	0	1	0	0	0	0	0	0	0	0	0.768844	0.231156	0
chr1	75139100	75139498	0.599103	0.0637479	0.0689535	0.0770647	0.0552624	0.022777	0.403263	3.39879	0.0369597	0	0.0417415	0.36641	2.22266	0.102873	0.0572632	0.0342337	0.343335	2.50071	0.101926	0.0495219	0.0547447	0.147826	2.13446	0.0303302	0.0247743	0.0160734	1	0	0	0	0	0	0	0	0	0.753769	0.246231	0	0	0	0	0	0	0	1	0	0
chr1	75142076	75142781	0.154476	0.0254035	0.17065	0.40735	0.112411	0.0359083	0.799598	0.163323	1.23744	0.0621883	0.0365945	0.804598	0.216401	1.23161	0.0838868	0.0448795	0.747589	0.565182	1.33983	0.055235	0.0577131	0.129724	0.0494116	0.864013	0.0405381	0.0227087	0	0	0	1	0	0	0	1	0	0	0	0	0	0	0	0	1	0	0	0	0
chr1	75156161	75157186	0.0981878	0	0.70854	0.354641	0.0763243	0.0277652	0.82658	0.225502	0.0588357	0.00655949	0.0339794	0.762514	0.184957	0.0860247	0.0308758	0.0136544	0.989573	0.171991	0.146666	0.0391479	0.0174246	0.16069	0.0391458	0.0429816	0.0743864	0.0230514	0	0	1	1	0	0	0	0	0.428293	0.571707	0	0	0	0	0	0	0	1	0	0	0
chr1	75175607	75177027	0.19141	0.227021	0.308973	0.466821	0.120695	0.0413891	0.859485	2.51476	0.116925	0.0613952	0.0576599	0.508072	2.06962	0.233466	0.038722	0.0353778	0.311847	2.31312	0.252885	0.0511528	0.060157	0.417525	1.56578	0.0777676	0.0327067	0.0215955	0	1	1	1	1	0	0	0	0.140845	0.859155	0	0	0	0	0	0	0	0.140845	0.859155	0	0
chr1	75184389	75185288	0.260435	0.17127	0.282805	0.197331	0.091201	0.0336185	1.04533	0.157019	0.838949	0.0948566	0.055656	1.01052	0.181546	1.31377	0.105445	0.0651313	0.573322	0.0666973	1.10407	0.0822683	0.0640691	0.605331	0.150115	0.60837	0.0499878	0.0417369	0	0	1	0	0	0	0	1	0	0	0	0	0	0	0	0	1	0	0	0	0
chr1	75207286	75207684	0.662804	0.115621	0.0358861	0.0551916	0.0433893	0.0193843	0.243095	3.60272	0.108248	0.0354756	0.0438629	0.118165	2.56011	0.158326	0.0254133	0.0469576	0.266387	2.52964	0.173117	0.063095	0.0735839	0.0863513	2.07423	0.0951371	0.0266779	0.0230829	1	0	0	0	0	0	0	0	0	0	1	0	0	0	0	0	0	0	0	1	0
chr1	75213303	75214253	0.261148	0.0840488	0.191904	0.418601	0.0787799	0.0296238	1.52377	0.826753	1.16937	0.0508094	0.0393694	1.08965	1.00677	1.32712	0.0739193	0.0299172	1.06755	0.988535	1.19041	0.107555	0.039715	0.481715	1.68297	0.850613	0.0632204	0.0285406	0	0	0	1	0	0	0	0.523158	0	0.476842	0	0	0	0	0	0	0	0	1	0	0
chr1	75215603	75216001	1.26293	0.274992	0.111714	0.0523941	0.0536703	0.032888	0.382318	3.23875	0.0652851	0.0392766	0.0323914	0.266886	1.78608	0.107699	0.0481772	0.0383833	0.422535	2.42592	0.0866953	0.207259	0.0591297	0.112432	2.13591	0.0857182	0.0329191	0.0228331	1	0	0	0	0	0	0	0	0	0.505025	0.494975	0	0	0	0	0	0	0	0.505025	0.494975	0
chr1	75225442	75226595	0.508725	0.155329	0.155863	0.712806	0.124514	0.100365	0.612583	0.148365	0.0594561	0.690888	0.0687679	1.31585	0.254812	0.083442	0.0983376	0.0504763	0.996894	0.176568	0.105801	0.125426	0.0299886	0.657083	0.394827	0.0592156	0.0389053	0.0162808	1	0	0	1	1	1	0	0	0.346921	0	0	0	0.137034	0	0.516045	0	0	0.653079	0.346921	0	0
chr1	75232517	75234018	0.335457	0.378996	0.354642	0.697192	0.232115	0.04384	0.975407	1.81814	0.102366	0.0800122	0.0373604	0.969592	1.10243	0.0973761	0.0515351	0.0264516	0.767209	2.11695	0.15535	0.0654413	0.0415401	0.383408	1.59053	0.0909697	0.0355242	0.0173128	0	1	1	1	1	0	0	0	0.067288	0.799467	0.133244	0	0	0	0	0	0	0	1	0	0
chr1	75332699	75334396	0.161134	0.0211072	0.918148	0.182113	0.0675885	0.029081	1.07764	0.328151	0.0488327	0.0442587	0.0394535	0.927045	0.179874	0.0510805	0.126803	0.0347571	0.242901	0.035746	0.027913	0.0958105	0.032737	0.0941675	0.0473853	0.0308655	0.215567	0.037912	0	0	1	1	0	0	0	0	0.295227	0.704773	0	0	0	0	0	0	0	1	0	0	0
chr1	75432421	75432819	0.787239	0.0674979	0.101334	0.0682903	0.0597586	0.0276692	0.441017	2.63483	0.0808736	0.067432	0.0410539	0.421437	1.56244	0.0897401	0.0815383	0.0348477	0.398324	1.9737	0.0304752	0.108339	0.042114	0.141911	1.84167	0.0272547	0.03039	0.0221252	1	0	0	0	0	0	0	0	0	1	0	0	0	0	0	0	0	0	0.449749	0.550251	0
chr1	75442385	75443551	0.655172	0.161277	0.960536	0.357594	0.0694403	0.0395911	0.97841	1.19425	0.0439462	0.0933897	0.03974	1.50074	0.475637	0.0402456	0.0880178	0.0239053	0.837752	0.332047	0.0265682	0.498983	0.0410315	0.547589	0.925823	0.0276561	0.250012	0.0219079	1	1	1	1	0	0	0	0	0	1	0	0	0	0	0	0	0	0	1	0	0
chr1	75444005	75444898	0.235518	0.0793858	0.471517	0.266274	0.0473959	0.0257315	1.32714	1.17808	0.0333455	0.279267	0.020556	1.69962	0.361886	0.0425621	0.182998	0.0426967	0.743355	0.133518	0.0285482	0.874484	0.0610589	0.592102	0.498721	0.0290062	0.531871	0.0357073	0	0	1	1	0	0	0	0	0	0.666293	0	0	0	0	0.333707	0	0	0	0.890258	0	0
chr1	75445720	75447929	0.579318	0.174311	1.46957	0.314519	0.126735	0.0301543	1.46358	1.90959	0.0574352	0.988447	0.0658595	1.87711	0.405339	0.0539157	0.910951	0.100858	0.765497	0.132749	0.04485	1.63499	0.106168	0.627871	0.274825	0.0439944	1.02697	0.0752351	1	1	1	1	1	0	0	0	0	0	0	0	0	0	1	0	0	0	0	0	0
chr1	75453359	75454024	0.200503	0.107726	0.306571	0.0971932	0.0579491	0.0295902	1.25697	0.457819	0.0763217	0.515131	0.0367148	1.5169	0.197352	0.0424364	0.611466	0.0574369	0.523285	0.0505232	0.053916	1.18613	0.0857763	0.332846	0.0831254	0.0412356	0.786433	0.112215	0	0	1	0	0	0	0	0	0	0	0	0	0	0	1	0	0	0	0	0	0
chr1	75460171	75460815	0.722814	0.486669	2.70245	0.338655	0.133355	0.0254298	1.30619	0.619446	0.0612168	0.0850439	0.0242307	1.70292	0.336203	0.072742	0.0872851	0.0259588	1.18944	0.17306	0.0757165	0.0971966	0.0399013	0.375903	0.0675684	0.0478243	0.607948	0.0514263	1	1	0	1	0	0	0	0	0.045031	0.954969	0	0	0	0	0	0	0	0.378882	0.621118	0	0
chr1	75473548	75473946	0.556803	0.0449987	0.0742471	0.126152	0.0355972	0.0215791	0.735818	0.574055	0.739157	0.0688398	0.0226287	0.956759	0.441633	0.575464	0.0503163	0.0155396	0.382757	0.108873	0.100709	0.178049	0.0443877	0.333348	0.190909	0.101398	0.323847	0.0120065	1	0	0	0	0	0	0	0.633166	0	0.366834	0	0	0	0	0	0	0.633166	0	0.366834	0	0
chr1	75474009	75474723	0.266602	0.125416	0.189116	0.628631	0.0791208	0.0385702	1.32182	1.6765	0.381372	0.0973053	0.0512216	1.90283	1.04856	0.253709	0.0582498	0.024051	0.86653	0.291057	0.0712044	0.552753	0.0639632	0.851056	0.653891	0.0624152	0.637556	0.048814	0	0	0	1	0	0	0	0	0	1	0	0	0	0	0	0	0	0	1	0	0
chr1	76568749	76569188	0.0115738	0	0.0807132	0.0479618	0.0577349	0.0652455	0.0474569	0.0608803	0.0349365	0.0279507	0.111179	0.0189125	0.0255076	0.0332599	0.0184852	0.0518043	0.0212069	0.023912	0.0313724	0.043038	0.0555895	0.0179429	0.0175946	0.0198172	0.0361316	0.0437167	0	0	0	0	0	1	0	0	0	0	0	0	1	0	0	0	0	0	0	0	0
chr1	77277986	77279362	0.0817945	0.11714	0.0769143	0.0587057	0.247668	0.0389979	0.0488511	0.0672862	0.0134063	0.0484147	0.275963	0.0303929	0.10361	0.0184498	0.052584	0.237959	1.14527	0.201443	0.129774	0.0690574	0.0440273	0.246812	0.0772037	0.0781731	0.0416381	0.145027	0	0	0	0	1	0	0	0	0	0	0	1	0	0	0	0	0	0	0	0	1
chr1	77294945	77295890	0.383965	0.123187	0.0778279	0.0427403	0.217234	0.0693657	0.0804261	0.0677845	0.0200143	0.0868598	0.182336	0.0528483	0.0859039	0.0195734	0.0609955	0.154006	0.832796	0.342158	0.101754	0.0439876	0.0261081	0.282389	0.164936	0.041757	0.0518324	0.0598211	1	0	0	0	1	0	0	0	0	0	0	1	0	0	0	0	0	0	0	0	0
chr1	77903601	77904070	0.142585	0	0.105129	0.233103	0.0405504	0.0233596	0.068644	0.0817627	0.0200366	0.0575821	0.0812962	0.0430114	0.0986859	0.0292789	0.11679	0.142004	0.0420299	0.0119999	0.0172064	0.0788301	0.0627838	0.0289686	0.0350252	0.0158347	0.0455439	0.100439	0	0	0	1	0	0	0	0	0	0	0	0	1	0	0	0	0	0	0	0	0
chr1	78158110	78158862	0.0309161	0	0.403871	0.130236	0.0621039	0.0308	0.481816	0.15758	0.0375714	0.0625855	0.104149	0.682756	0.105354	0.0501642	0.100849	0.0900204	0.100688	0.0211893	0.0104995	0.07962	0.0520035	0.057671	0.041579	0.0154348	0.100434	0.07369	0	0	1	0	0	0	0	0	1	0	0	0	0	0	0	0	0	1	0	0	0
chr1	78320281	78321595	0.305471	0	1.08979	0.107506	0.0563963	0.0334851	0.637287	0.228192	0.0214784	0.0358177	0.0662679	0.848928	0.167161	0.0480374	0.0364188	0.0838187	0.0791725	0.0268812	0.0207929	0.0864545	0.039055	0.0797946	0.0451987	0.0172133	0.0915383	0.0568788	0	0	1	0	0	0	0	0	1	0	0	0	0	0	0	0	0	1	0	0	0
chr1	78485161	78485559	0.476212	0.202494	0.0554791	0.034463	0.0528073	0.0346807	0.162934	3.34395	0.070755	0.0506796	0.0411718	0.133909	2.8968	0.0651748	0.0283372	0.0747553	0.289614	2.40988	0.0801323	0.107272	0.0737963	0.0766092	2.06124	0.0417127	0.0256853	0.0253316	1	0	0	0	0	0	0	0	0	0	1	0	0	0	0	0	0	0	0	1	0
chr1	78654337	78654735	1.43599	0.262493	0.0688162	0.0169136	0.0407882	0.0242179	0.185794	3.07862	0.0419085	0.0372355	0.0346503	0.320267	2.1381	0.0730892	0.0268458	0.0417495	0.415147	2.09863	0.0453505	0.0539095	0.0575555	0.111883	1.77276	0.0267329	0.0367399	0.032355	1	0	0	0	0	0	0	0	0	0	1	0	0	0	0	0	0	0	0.497487	0.502513	0
chr1	79371554	79371952	0.83018	0.0674979	0.0692972	0.0169136	0.0243518	0.0176168	0.0358091	0.0898653	0.00339904	0.0489198	0.0153019	0.041186	0.0398625	0.0184982	0.0566353	0.0444805	0.0333598	0.0172859	0.010842	0.0205851	0.0532202	0.0361837	0.020449	0.0211035	0.0474546	0.062128	1	0	0	0	0	0	0	0	0	0	0	0	1	0	0	0	0	0	0	0	0
chr1	79637611	79638708	0.262973	0.122444	2.07663	0.193411	0.0660392	0.0271677	0.334269	0.145253	0.0225	0.0514579	0.028756	0.318291	0.0981782	0.0267032	0.078204	0.0693215	0.227023	0.0290121	0.0195389	0.0350114	0.0232702	0.225249	0.0509444	0.0699051	0.0469049	0.0467934	1	1	1	1	0	0	0	0	1	0	0	0	0	0	0	0	0	0.354603	0.364631	0	0
chr1	79683545	79684536	0.854245	0.0451803	0.867945	0.11231	0.0486569	0.0430835	0.692152	0.119534	0.0182903	0.17261	0.0465999	0.346044	0.100523	0.0299114	0.0930625	0.0843125	0.131461	0.0285452	0.0253626	0.0760251	0.0709109	0.417093	0.0647522	0.0809388	0.0742078	0.0604834	1	0	1	0	0	0	0	0	1	0	0	0	0	0	0	0	0	0.605449	0	0	0
chr1	79707575	79708896	0.953286	0.0338936	0.100456	0.0821463	0.0612186	0.0775588	0.148543	0.102609	0.504678	0.0590616	0.0371484	0.220599	0.144598	0.706975	0.0453074	0.0451987	0.134644	0.0328783	0.164922	0.0780647	0.0438655	0.664353	0.514781	0.269667	0.0510161	0.0163598	1	0	0	0	0	1	1	0	0	0	0	0	0	0	0	1	0	0	0	0	0
chr1	79737331	79738060	0.101659	0.0245671	0.130764	0.05589	0.0901876	0.106927	0.297151	0.121038	0.263704	0.0404269	0.0329447	0.197261	0.166287	0.269239	0.0581334	0.0501174	0.153233	0.0506136	0.0834517	0.0744682	0.0444704	0.543903	0.315044	0.12942	0.0425218	0.0157546	0	0	0	0	0	1	0.451303	0.548697	0	0	0	0	0	0	0	0.451303	0.548697	0	0	0	0
chr1	79747436	79748085	0.112845	0.0302784	0.0679187	0.0743994	0.0468091	0.111154	0.343679	0.0779517	0.192282	0.0306476	0.0400171	0.305131	0.110869	0.248857	0.0337568	0.134311	0.0993253	0.0161011	0.0676713	0.0636559	0.0816012	0.313347	0.17578	0.162155	0.0269753	0.0223698	0	0	0	0	0	1	0	0	0.439137	0	0	0	0.560863	0	0	0.252696	0.308166	0.439137	0	0	0
chr1	79760727	79761647	0.0674998	0	0.543422	0.115091	0.0554628	0.0275095	0.875916	0.146098	0.0325697	0.0851703	0.0625094	0.623386	0.11441	0.0628475	0.100168	0.060668	0.368261	0.0365829	0.0482106	0.090744	0.0412749	0.269442	0.049415	0.139242	0.0474644	0.0479118	0	0	1	0	0	0	0	0	1	0	0	0	0	0	0	0	0	1	0	0	0
chr1	79772421	79772819	0.567381	0.0674979	0.0913653	0.0797356	0.0610477	0.0348567	0.152781	2.2641	0.037155	0.0083762	0.0196627	0.24779	1.71743	0.0614942	0.0345581	0.0170216	0.420309	1.89637	0.0508057	0.0820534	0.0602663	0.147371	1.53702	0.0556079	0.0264196	0.0286628	1	0	0	0	0	0	0	0	0	0	1	0	0	0	0	0	0	0	0.449749	0.550251	0
chr1	80026198	80027846	0.138426	0.0380359	0.183411	0.14106	0.160509	0.0314933	0.398427	0.118775	0.0171725	0.150918	0.0772731	0.737051	0.15501	0.030881	0.0971848	0.0507203	0.974149	0.450515	0.107058	0.0491199	0.0270425	0.578638	0.143928	0.0733587	0.0390742	0.0214572	0	0	1	1	1	0	0	0	1	0	0	0	0	0	0	0	0	0.757282	0.242718	0	0
chr1	80328651	80329029	0.154238	0	0.050235	0.258424	0.0485891	0.0272544	0.282842	0.0798144	0.0987692	0.0233454	0.0191312	0.499211	0.123874	0.113213	0.0445689	0	0.300079	0.045424	0.135217	0.0348141	0.0195469	0.331274	0.0865829	0.126034	0.0226204	0.00257219	0	0	0	1	0	0	0	0	1	0	0	0	0	0	0	0	0	1	0	0	0
chr1	80336249	80336647	0.533724	0.0449987	0.0218616	0.0662557	0.0404294	0.0169466	0.199655	3.42404	0.0936627	0.0304781	0.0300538	0.123519	2.48031	0.103129	0.0497472	0.0314815	0.104121	2.52512	0.0698239	0.0582015	0.0339685	0.0738526	2.18898	0.0620059	0.033259	0.0115207	1	0	0	0	0	0	0	0	0	0.379397	0.620603	0	0	0	0	0	0	0	0	1	0
chr1	80336999	80337397	0.686915	0	0.0336173	0.0169136	0.0146873	0.00926493	0.0462964	2.26504	0.0237282	0	0.0111376	0.0932191	1.25046	0.0254012	0.00470979	0.0174027	0.0376476	1.83661	0.0329225	0.0100329	0.0144419	0.0150542	1.50101	0.0145679	0.0112586	0.00333127	1	0	0	0	0	0	0	0	0	0	1	0	0	0	0	0	0	0	0	1	0
chr1	80602937	80603335	0.927795	0	0.0937025	0.0911808	0.0408891	0.0673089	0.0535616	0.0953396	0.0137915	0.0439926	0.226641	0.269543	0.149031	0.0187004	0.0682724	0.112143	0.11267	0.0236298	0.033114	0.0462277	0.0465115	0.35801	0.286746	0.0968672	0.0359785	0.00810611	1	0	0	0	0	0	0	0	0	0	0	1	0	0	0	0	0	0.660804	0	0	0
chr1	80661742	80662140	0.650296	0.0449987	0.0771346	0.0483245	0.0614739	0.0398828	0.0539871	0.103992	0.0222826	0.0327305	0.255693	0.162146	0.100512	0.0297157	0.0945098	0.227653	0.0863834	0.0397562	0.0295592	0.0666762	0.0485229	0.432666	0.387948	0.0319367	0.04876	0.0290376	1	0	0	0	0	0	0	0	0	0	0	0.648241	0.351759	0	0	0	0	0	0	0	0
chr1	82313048	82313446	0.658031	0.0449987	0.0259865	0.000890186	0.0350478	0.0294283	0.0890363	3.3488	0.0558434	0.0370243	0.0284235	0.0916122	2.35322	0.0486317	0.0196241	0.0383409	0.178147	2.50287	0.0881308	0.0778982	0.0855148	0.0974578	2.18961	0.0565549	0.0437833	0.0525786	1	0	0	0	0	0	0	0	0	0	1	0	0	0	0	0	0	0	0	1	0
chr1	82370192	82371189	0.212495	0.0718534	0.212991	0.203571	0.188032	0.034444	0.525732	0.104837	1.04923	0.0781428	0.0532356	1.16742	0.214283	0.826762	0.0852326	0.125775	1.26525	0.221273	0.382457	0.0572664	0.0673269	0.272479	0.0682603	0.445943	0.0704721	0.0695003	0	0	1	0	1	0	0.189569	0.810431	0	0	0	0	0	0	0	0	1	0	0	0	0
chr1	82621248	82622573	0.0500438	0.223023	0.281938	0.319687	0.0540558	0.0258847	0.586963	0.102686	0.0280089	0.11432	0.0161374	0.727246	0.116276	0.039628	0.0557279	0.0230908	0.218704	0.0237556	0.0181069	0.0777431	0.0214462	0.293083	0.051792	0.0283173	0.0401244	0.0221141	0	0	1	1	0	0	0	0	1	0	0	0	0	0	0	0	0	1	0	0	0
chr1	82623935	82625140	0.108564	0.163489	0.576201	0.177756	0.0573021	0.0293838	0.728629	0.132738	0.0258257	0.0613761	0.0451947	1.17942	0.140739	0.0887828	0.102741	0.0650384	0.367685	0.0262402	0.0160581	0.0789432	0.0368233	0.309536	0.0584341	0.0400621	0.0621023	0.0546018	0	1	1	0	0	0	0	0	1	0	0	0	0	0	0	0	0	1	0	0	0
chr1	82633754	82634573	0.137799	0.306144	0.704817	0.709147	0.120034	0.032746	0.93628	0.274126	0.0590782	0.134394	0.0385169	1.12024	0.209075	0.0856871	0.0645717	0.0320995	0.779301	0.0889179	0.0668996	0.0677262	0.0410649	0.206336	0.0793574	0.0487816	0.0997636	0.0499418	0	1	1	1	0	0	0	0	0.5116	0.4884	0	0	0	0	0	0	0	0.5116	0.4884	0	0
chr1	82644336	82645743	0.0671893	0.190932	1.12141	0.401887	0.126808	0.037684	0.87225	0.881	0.0514158	0.102023	0.0377283	0.954715	0.534041	0.0914712	0.0520971	0.0385373	0.694676	0.256676	0.0509151	0.150128	0.0434142	0.276982	0.1441	0.0395421	0.177098	0.0620678	0	1	1	1	1	0	0	0	0.147122	0.852878	0	0	0	0	0	0	0	0.147122	0.852878	0	0
chr1	82658699	82659347	0.203704	0	0.247857	0.201673	0.0722708	0.028751	0.951858	0.162592	0.150401	0.0580609	0.0503581	1.10845	0.203673	0.38442	0.0580718	0.0420135	0.102565	0.0251467	0.0165597	0.0830294	0.0414122	0.44106	0.0911768	0.037578	0.0676217	0.0391138	0	0	1	1	0	0	0	0	1	0	0	0	0	0	0	0	1	0	0	0	0
chr1	82682614	82683877	0.37689	0.0992606	0.424871	0.109402	0.064846	0.0367114	0.868456	0.158147	0.171456	0.0638812	0.0665854	0.934953	0.152079	0.522672	0.0760386	0.130167	0.286917	0.039869	0.0504773	0.0809779	0.0494231	0.330502	0.0674319	0.0894074	0.083181	0.0979861	1	1	1	0	0	0	0	0	1	0	0	0	0	0	0	0	0.694378	0.305622	0	0	0
chr1	82710281	82711031	0.142949	0	0.104776	0.0962331	0.0564744	0.0749582	0.227306	0.0837111	0.191682	0.102608	0.0609485	0.451495	0.12094	0.393255	0.0934335	0.113247	0.176486	0.0481001	0.0627227	0.11457	0.0369933	0.534625	0.171562	0.11709	0.0548387	0.067611	0	0	0	0	0	1	0	0	0.266667	0	0	0	0.733333	0	0	0.308	0.692	0	0	0	0
chr1	82714398	82715283	0.0736487	0.01321	0.382874	0.0532445	0.0528514	0.0207351	0.467439	0.144374	0.0640728	0.0311799	0.0229414	0.555412	0.099503	0.182798	0.0321771	0.0265732	0.615578	0.0430764	0.063841	0.0486418	0.0268893	0.136528	0.0213562	0.0694411	0.0609658	0.026648	0	0	1	0	0	0	0	0	1	0	0	0	0	0	0	0	0.228249	0.771751	0	0	0
chr1	82729848	82730490	0.144933	0.0139482	0.166427	0.326544	0.103549	0.0276227	0.327036	0.0749022	0.835394	0.0826907	0.0204825	0.554332	0.097632	1.17148	0.0651719	0.0241365	0.343789	0.030463	0.970065	0.0391742	0.0324434	0.143392	0.026691	0.800786	0.0358843	0.0124943	0	0	0	1	0	0	1	0	0	0	0	0	0	0	0	0	1	0	0	0	0
chr1	82812029	82813406	0.106222	0.286136	1.12156	0.87686	0.323729	0.029958	1.0902	0.468347	0.0531419	0.0368035	0.0428254	1.05584	0.247714	0.0698679	0.0445028	0.0387161	1.03369	0.590622	0.0928617	0.065203	0.0275838	0.304494	0.20204	0.0468882	0.128474	0.0573661	0	1	1	1	1	0	0	0	0.273784	0.726216	0	0	0	0	0	0	0	0.419027	0.580973	0	0
chr1	82816454	82817244	0.114597	0.136021	0.252452	0.378577	0.153022	0.0305423	1.00508	0.664885	0.0617657	0.0206031	0.0175062	0.907985	0.435174	0.0812521	0.0500063	0.0323925	1.1296	0.917409	0.120809	0.0536028	0.0217267	0.142147	0.0490023	0.0349393	0.0810526	0.0245869	0	0	0	1	1	0	0	0	0.055696	0.944304	0	0	0	0	0	0	0	0.437975	0.562025	0	0
chr1	82821370	82822895	0.171904	0.0293598	0.903053	0.490902	0.291194	0.0304502	1.22328	0.246966	0.0817247	0.0184804	0.0317382	1.26204	0.185693	0.158938	0.0471441	0.0297815	1.35671	0.399481	0.229222	0.0559711	0.0273424	0.233004	0.0500075	0.0635229	0.101343	0.053733	0	0	1	1	1	0	0	0	0.737705	0.262295	0	0	0	0	0	0	0.193443	0.806557	0	0	0
chr1	82832668	82833406	0.0767049	0.0849363	0.255188	0.172552	0.106326	0.0315198	0.808155	0.535742	0.0401102	0.0117676	0.0159007	0.734859	0.38233	0.0683703	0.05063	0.0337045	1.09527	0.944254	0.130132	0.0530968	0.0237831	0.499274	0.15023	0.0722997	0.0585977	0.0162063	0	0	1	0	0	0	0	0	0	1	0	0	0	0	0	0	0	0.178862	0.821138	0	0
chr1	82835894	82836292	0.647587	0.157495	0.0558915	0.0242894	0.031774	0.0164608	0.122626	3.06396	0.0321802	0.0164004	0.0265573	0.233731	2.14419	0.0661589	0.0262571	0.0293009	0.217979	2.3363	0.0634116	0.033174	0.033144	0.0974179	1.89584	0.0199913	0.0153106	0.00943859	1	0	0	0	0	0	0	0	0	0.266332	0.733668	0	0	0	0	0	0	0	0.266332	0.733668	0
chr1	82852122	82853044	0.194824	0	0.317833	0.46694	0.122185	0.0409994	0.709453	0.105738	0.286055	0.0291995	0.0423457	1.03254	0.168207	0.247573	0.0499374	0.0322879	0.677121	0.0608105	0.363348	0.0502713	0.0414334	0.442092	0.0886851	0.121781	0.0409695	0.0195749	0	0	1	1	0	0	0.047722	0.867679	0.084599	0	0	0	0	0	0	0	0.481562	0.518438	0	0	0
chr1	82933576	82934545	0.127431	0	0.469492	0.11439	0.0558037	0.0197531	0.831011	0.377024	0.070757	0.272426	0.121852	0.833602	0.222315	0.0560862	0.43644	0.329488	0.0985948	0.0203745	0.034856	0.0624694	0.206268	0.0286904	0.0431894	0.019242	0.0602553	0.158006	0	0	1	0	0	0	0	0	0.562436	0.437564	0	0	0	0	0	0	0	0	0	0	0
chr1	83882114	83882947	0.00831751	0	0.0652337	0.115141	0.0549933	0.0519517	0.0419017	0.0664668	0.0227862	0.0626542	0.104467	0.0397545	0.0859832	0.0316038	0.0684465	0.119615	0.0379457	0.0285978	0.025176	0.0588359	0.0974984	0.0255232	0.0447536	0.0404634	0.0549036	0.108093	0	0	0	0	0	1	0	0	0	0	0	0	1	0	0	0	0	0	0	0	0
chr1	83999122	83999520	0.417282	0.0449987	0.0682659	0.0881288	0.0542423	0.0270325	0.0976998	0.0753957	0.0273616	0.0927014	0.174627	0.0439819	0.0781898	0.0352301	0.101103	0.183533	0.0420582	0.0277747	0.0320475	0.0543469	0.0773569	0.0798074	0.053654	0.0206641	0.0561705	0.120939	1	0	0	0	0	0	0	0	0	0	0	0	1	0	0	0	0	0	0	0	0
chr1	84383054	84383902	0.172788	0.00762654	0.0953132	0.0939453	0.0837517	0.0578033	0.108658	0.154028	0.0287033	0.043079	0.326094	0.0652872	0.155282	0.0332659	0.073683	0.202505	0.0487401	0.0413592	0.0238836	0.0950679	0.150128	0.0502565	0.0781675	0.0570888	0.0763195	0.211671	0	0	0	0	0	1	0	0	0	0	0	1	0	0	0	0	0	0	0	0	0
chr1	84736465	84737273	0.127035	0	0.293052	0.0798039	0.0414747	0.0256201	0.414253	0.0853793	0.705082	0.0241313	0.0235796	0.499639	0.0974943	1.17559	0.0585297	0.0180098	0.0963465	0.0409383	0.592309	0.0481131	0.0250273	0.069177	0.0244834	0.890232	0.0394226	0.0125255	0	0	1	0	0	0	0.414604	0.585396	0	0	0	0	0	0	0	0.414604	0.585396	0	0	0	0
chr1	84787795	84788485	0.107479	0	0.248037	0.0935253	0.0528162	0.0213862	0.460952	0.099956	0.333401	0.0340233	0.0280539	0.335943	0.0705616	0.621623	0.0517185	0.0228604	0.0681714	0.0116235	0.35884	0.037001	0.0114145	0.119886	0.0257915	0.488256	0.00960777	0.0191831	0	0	1	0	0	0	0	1	0	0	0	0	0	0	0	0.297101	0.702899	0	0	0	0
chr1	84846899	84847625	0.12576	0.0123343	0.118604	0.500907	0.0500068	0.0295058	1.09444	0.166495	0.159851	0.0092224	0.0294518	1.08408	0.186289	0.196054	0.0485622	0.0136257	0.297432	0.0286992	0.0799441	0.0496208	0.0316551	0.0788754	0.0249841	0.12029	0.0574195	0.0481898	0	0	0	1	0	0	0	0	1	0	0	0	0	0	0	0	0	1	0	0	0
chr1	84848213	84849274	0.146227	0.0337595	0.923352	0.0757533	0.066219	0.0258584	0.940648	0.352143	0.0803325	0.0270376	0.0327527	1.3147	0.197601	0.128791	0.0517062	0.0226496	0.738866	0.0500342	0.0823715	0.0532531	0.0256063	0.190064	0.0472061	0.0898811	0.0658488	0.0219516	0	0	1	0	0	0	0	0	0.63525	0.36475	0	0	0	0	0	0	0	1	0	0	0
chr1	84857471	84857999	0.174184	0	0.164998	0.260257	0.0722752	0.0335805	1.56535	0.255293	0.125683	0.0481233	0.0519418	0.98461	0.200053	0.11721	0.0918761	0.0537963	0.840035	0.0864174	0.0718835	0.0720098	0.0289199	0.134206	0.038782	0.0729762	0.13269	0.0870506	0	0	0	1	0	0	0	0	1	0	0	0	0	0	0	0	0	1	0	0	0
chr1	84911620	84912018	0.59433	0	0.103671	0.0979205	0.0711382	0.0375206	0.129102	0.115971	0.0463363	0.103189	0.083404	0.19197	0.0729805	0.0346907	0.11955	0.052822	0.0951226	0.0381969	0.041454	0.080003	0.0432384	0.357301	0.105612	0.0572281	0.077056	0.133889	1	0	0	0	0	0	0	0	0	0	0	0	1	0	0	0	0	0	0	0	0
chr1	84919838	84920877	0.127836	0.0086186	0.900661	0.0707324	0.0528898	0.0337865	0.468009	0.171807	0.0320621	0.0277718	0.0607826	0.66105	0.145757	0.0568579	0.0746085	0.109069	0.252119	0.0324696	0.0248927	0.0534068	0.0579871	0.113452	0.0447206	0.0399094	0.0646545	0.0856778	0	0	1	0	0	0	0	0	1	0	0	0	0	0	0	0	0	1	0	0	0
chr1	87630956	87631354	0.460222	0	0.0812593	0.0671455	0.0419654	0.0368505	0.0920153	0.0973142	0.0344462	0.0766527	0.104304	0.261512	0.0918044	0.0316302	0.132521	0.0492865	0.125287	0.0298671	0.0465674	0.0537728	0.0319322	0.366374	0.236641	0.160919	0.0233602	0.0277467	1	0	0	0	0	0	0	0	0	0	0	0	1	0	0	0	0	0.386935	0	0	0
chr1	87689890	87690288	0.694136	0.214993	0.0647598	0.0169136	0.0300698	0.0168042	0.1153	2.83167	0.0270751	0.0763009	0.0309181	0.0775534	2.25253	0.0265607	0.032576	0.0346148	0.169039	2.26584	0.0328268	0.0681663	0.0319197	0.0755925	1.7617	0.0274332	0.0239585	0.012062	1	0	0	0	0	0	0	0	0	0	1	0	0	0	0	0	0	0	0	1	0
chr1	87690764	87690796	0.105852	1.13489	0.0820843	0.0506136	0.0614953	0.0272975	0.206052	3.55682	0.0783961	0.0385199	0.0444644	0.0917464	2.93342	0.113862	0.0312416	0.0934776	0.140116	2.51428	0.0624077	0.0435213	0.0497222	0.0617469	2.23401	0.0626731	0.0414336	0.032283	0	1	0	0	0	0	0	0	0	0	1	0	0	0	0	0	0	0	0	1	0
chr1	87736020	87736995	0.105592	0	0.502104	0.0645778	0.053515	0.0294011	0.644668	0.125395	0.349529	0.00399386	0.0271022	0.637298	0.155643	0.621805	0.0586942	0.0125657	0.273206	0.0273924	0.353118	0.0617725	0.0255904	0.370581	0.0761497	0.30212	0.0367831	0.0122839	0	0	1	0	0	0	0	1	0	0	0	0	0	0	0	0	1	0	0	0	0
chr1	87798037	87798435	0.767383	0.134996	0.144026	0.0431106	0.0651066	0.0280043	1.07828	0.158542	0.250552	0.0686989	0.024652	1.63043	0.2354	0.332818	0.112014	0.033895	0.246013	0.0505782	0.116487	0.065227	0.0630647	0.799443	0.122282	0.148795	0.116121	0.0289265	1	0	0	0	0	0	0	1	0	0	0	0	0	0	0	0	1	0	0	0	0
chr1	87853933	87854331	0.578081	0.0524983	0.0875842	0.0975394	0.0656559	0.0387185	0.763207	0.228592	0.0570283	0.504331	0.0599505	0.830066	0.218866	0.0476476	0.44847	0.0566963	0.139885	0.0397162	0.046499	0.111236	0.0290963	0.568423	0.132603	0.0341885	0.254528	0.0414605	1	0	0	0	0	0	0	0	0	0	0	0	0	0	1	0	0	0	0	0	0
chr1	88051014	88051412	0.86783	0.269992	0.0985148	0.270236	0.145135	0.0929594	0.208805	2.33323	0.0658843	0.0301262	0.0253788	0.173429	1.45822	0.0578538	0.0404061	0.0250878	0.244279	2.21181	0.0557277	0.0677697	0.0447125	0.0995184	1.87025	0.0289023	0.0363728	0.0193353	1	0	0	0	0	0	0	0	0	0	1	0	0	0	0	0	0	0	0	1	0
chr1	88056362	88058383	0.111202	0.0464006	0.146772	0.229652	0.192517	0.0342609	0.181321	0.112103	0.952622	0.0434287	0.045542	0.945899	0.215013	0.902107	0.0814586	0.0797458	1.19387	0.261589	0.45978	0.0613465	0.0334942	0.132174	0.0585165	0.522626	0.0766025	0.0190578	0	0	0	0	1	0	1	0	0	0	0	0	0	0	0	0	1	0	0	0	0
chr1	88124879	88125646	0.709276	0.011675	0.385128	0.193216	0.0948886	0.0259464	0.744836	0.153719	0.14709	0.0482491	0.164696	1.0145	0.210244	0.320838	0.0687254	0.160502	0.6696	0.066675	0.166275	0.0659913	0.0506103	0.488173	0.0940475	0.103529	0.0856141	0.0417316	1	0	1	0	0	0	0	0	1	0	0	0	0	0	0	0	1	0	0	0	0
chr1	88141534	88142620	0.136292	0.0989472	0.173919	1.28161	0.0862787	0.0339052	0.467796	0.130131	0.477194	0.0775946	0.0311781	1.60287	0.226742	0.369133	0.0761766	0.0374752	0.840443	0.0680239	0.407758	0.0734373	0.0426256	0.633079	0.0601929	0.304904	0.0925774	0.0438489	0	0	0	1	0	0	0.018416	0.981584	0	0	0	0	0	0	0	0	0.61326	0.38674	0	0	0
chr1	88159982	88161153	0.656491	0.149968	0.21083	0.629364	0.0755345	0.0801993	1.42555	0.409921	0.0886547	0.23792	0.0415465	1.88338	0.304763	0.122196	0.0558534	0.0398568	0.797279	0.057569	0.0723243	0.0938112	0.0437394	0.685177	0.515442	0.070686	0.0352895	0.0205595	1	0	1	1	0	1	0	0	0.130658	0.869342	0	0	0	0	0	0	0	0.487617	0.512383	0	0
chr1	88164997	88166170	0.0875056	0.0998787	0.314224	0.75726	0.0891729	0.0300177	1.23911	0.29988	0.0723089	0.206729	0.0330446	1.42709	0.36913	0.0834967	0.0651399	0.0313555	0.986894	0.083726	0.110278	0.0743256	0.0525286	0.829023	0.153712	0.0993891	0.0434	0.0289358	0	0	1	1	0	0	0	0	0.658994	0.341006	0	0	0	0	0	0	0	0.173061	0.826939	0	0
chr1	88197740	88198138	0.908195	0.0931221	0.149319	0.0611685	0.068111	0.0414074	0.737733	0.193706	0.0388871	0.802918	0.0738578	1.81206	0.250424	0.141554	0.0568511	0.0438878	0.534727	0.0687835	0.0944745	0.15186	0.034943	0.889019	0.265788	0.0503491	0.0626018	0.0315777	1	0	0	0	0	0	0	0	0	0	0	0	0	0	1	0	0	1	0	0	0
chr1	88208730	88209530	0.051322	0.167901	0.0416236	0.825826	0.0986382	0.0152116	0.222975	0.0987821	0.0119667	0.215046	0.0550382	0.499811	0.13216	0.0482477	0.0305387	0.0265949	0.364689	0.0476135	0.129052	0.0642483	0.148017	0.187803	0.022209	0.0530072	0.0336068	0.0157306	0	1	0	1	0	0	0	0	0	0	0	0	0	1	0	0	0	1	0	0	0
chr1	88217442	88218101	0.155446	0.0951185	0.102221	0.428948	0.0829954	0.0280788	0.260145	0.130913	0.0362274	0.369587	0.106604	1.27168	0.237343	0.0784639	0.0939029	0.0839671	0.638344	0.0909877	0.123611	0.0758239	0.14559	0.334357	0.110067	0.063254	0.0813897	0.111174	0	0	0	1	0	0	0	0	0	0	0	0	0	0.456753	0.543247	0	0	0.456753	0.543247	0	0
chr1	88240581	88240979	0.553323	0.0143745	0.0609788	0.0729954	0.0702975	0.0335751	0.520174	0.127176	0.292148	0.0415993	0.0422325	0.740019	0.172008	0.447057	0.0861698	0.0450522	0.183745	0.0218706	0.255204	0.0368646	0.0431884	0.499453	0.188995	0.166206	0.0304852	0.0188494	1	0	0	0	0	0	0	0.550251	0.449749	0	0	0	0	0	0	0	1	0	0	0	0
chr1	88243429	88243827	0.4089	0	0.0914339	0.0679087	0.0498809	0.0215121	0.31532	0.0894791	0.646077	0.0102767	0.0287377	0.236408	0.0892124	0.837028	0.0409556	0.0217639	0.114718	0.0186586	0.447886	0.0176053	0.0355677	0.298783	0.0497173	0.308657	0.0206136	0.0147687	1	0	0	0	0	0	0.067839	0.932161	0	0	0	0	0	0	0	0	1	0	0	0	0
chr1	88255712	88256110	2.07725	0.563108	0.0965899	0.0507406	0.0411133	0.0270325	0.0660249	2.90952	0.13966	0.0480751	0.029661	0.0771965	2.05843	0.0413242	0.0417994	0.0356522	0.141837	2.18675	0.0622221	0.0558503	0.0408272	0.0405595	1.67648	0.0170119	0.0205455	0.0163787	1	1	0	0	0	0	0	0	0	0	1	0	0	0	0	0	0	0	0	1	0
chr1	88323871	88324563	0.187563	0.116463	0.176821	0.137432	0.0775478	0.089754	0.260974	0.204112	0.0928111	1.16442	0.104096	0.428834	0.310176	0.0980238	0.364064	0.186069	0.206648	0.0596589	0.0536524	0.186585	0.0606512	0.786251	0.167414	0.113723	0.0760142	0.0803827	0	0	0	0	0	1	0	0	0	0	0	0	0	1	0	0	0	0	0	0	0
chr1	88335969	88336707	0.146664	0.133471	0.134434	0.349151	0.0645698	0.0343116	0.90068	0.167863	0.0429546	0.460228	0.032723	1.76745	0.318596	0.0590923	0.0931851	0.021659	0.623154	0.0630633	0.068358	0.21095	0.0304532	0.864189	0.249254	0.0474419	0.0500329	0.0119395	0	0	0	1	0	0	0	0	0.144986	0	0	0	0	0	0.855014	0	0	1	0	0	0
chr1	88337751	88338149	0.612123	0.0224993	0.124845	0.0311566	0.0303949	0.0160671	0.475154	0.690476	0.00826971	0.0168932	0.0174233	0.276443	0.598742	0.0181071	0.0364027	0.0102045	0.433637	1.51765	0.0231333	0.0562061	0.0165658	0.120835	1.16045	0.00619239	0.00607802	0.00570478	1	0	0	0	0	0	0	0	0	1	0	0	0	0	0	0	0	0	0.497487	0.502513	0
chr1	88339114	88339512	0.695167	0.134996	0.0394609	0.0331913	0.0292738	0.0266304	0.648058	2.17029	0.0561559	0.0952353	0.0263413	0.558222	1.35097	0.0791024	0.0628953	0.0149044	0.84728	1.93953	0.0171586	0.175657	0.0275222	0.244467	1.7389	0.0412321	0.0380861	0.0104519	1	0	0	0	0	0	0	0	0	1	0	0	0	0	0	0	0	0	1	0	0
chr1	88375404	88376387	0.377893	0.0546576	0.66558	0.294002	0.194152	0.0370612	0.830056	0.241048	0.0411388	0	0.0441876	1.15289	0.205046	0.0842362	0.0379953	0.0271384	1.21218	0.243926	0.108504	0.0537209	0.0328177	0.480172	0.123255	0.0747429	0.0412624	0.0362315	1	0	1	1	1	0	0	0	0.593082	0.406918	0	0	0	0	0	0	0	1	0	0	0
chr1	88383723	88384121	0.812382	0.169995	0.0945274	0.0927068	0.0633351	0.0398828	0.201023	2.54905	0.0403848	0.0455412	0.0408968	0.146104	1.88637	0.0374951	0.0299464	0.0602319	0.307025	2.46133	0.0639585	0.0420041	0.0725721	0.135488	1.88743	0.0429759	0.0359921	0.0329796	1	0	0	0	0	0	0	0	0	0	1	0	0	0	0	0	0	0	0	1	0
chr1	88420378	88421634	0.245087	0.570363	0.320646	1.32913	0.117444	0.0347844	1.0669	0.252995	0.114881	0.0777983	0.0449219	1.17127	0.315629	0.0828023	0.0424722	0.0116463	1.23244	0.559814	0.154169	0.0397703	0.0227828	0.635183	0.321071	0.0924118	0.0304841	0.0186051	0	1	1	1	1	0	0	0	0.813694	0.186306	0	0	0	0	0	0	0	0.495223	0.504777	0	0
chr1	88422489	88422887	1.07596	0.0899972	0.0601538	0.0256883	0.0614516	0.0327373	1.24237	2.79391	0.0459586	0.0289295	0.0667863	1.41633	2.09681	0.0768777	0.0203698	0.0176568	1.08589	2.33986	0.0377215	0.0353884	0.033069	0.284706	2.11645	0.0392275	0.0217557	0.022958	1	0	0	0	0	0	0	0	0	1	0	0	0	0	0	0	0	0	1	0	0
chr1	88424396	88424794	0.944813	0.388113	0.114052	0.0340815	0.0290607	0.0257257	0.191265	3.6343	0.521058	0.0306893	0.0252216	0.141087	2.6283	0.608996	0.0351664	0.0204301	0.663551	2.47613	0.250843	0.0475536	0.0439005	0.0874085	2.03919	0.121348	0.0223948	0.0125339	1	0	0	0	0	0	0	0	0	0	1	0	0	0	0	0	0	0	0	1	0
chr1	88427798	88428196	0.531275	0	0.0548605	0.104534	0.0403622	0.0296629	0.532211	0.146262	0.810312	0.0306187	0.0236895	0.694669	0.201577	1.1116	0.0629346	0.0386161	0.437556	0.106168	0.854335	0.05067	0.0255233	0.338312	0.109525	0.365103	0.0250735	0.0154626	1	0	0	0	0	0	0	1	0	0	0	0	0	0	0	0	1	0	0	0	0
chr1	88428243	88428641	0.654936	0.0868722	0.139007	0.12717	0.0547243	0.0273592	1.23937	0.270003	0.656158	0.0552547	0.0739952	1.21224	0.328513	0.753585	0.0557129	0.0391243	0.747491	0.158452	0.636124	0.0377941	0.0424138	0.506063	0.189746	0.214838	0.0441097	0.0223195	1	0	0	0	0	0	0	1	0	0	0	0	0	0	0	0	1	0	0	0	0
chr1	88454367	88454986	0.0928606	0.0578657	0.261768	0.349389	0.0606622	0.0311805	1.21086	0.222524	0.27924	0.0615958	0.0309559	1.38426	0.301919	0.344703	0.0477835	0.0571996	0.699622	0.0939194	0.252771	0.0532943	0.0292149	0.613784	0.134527	0.224678	0.0617587	0.0170729	0	0	0	1	0	0	0	1	0	0	0	0	0	0	0	0	1	0	0	0	0
chr1	88455871	88456533	0.0707808	0.0135268	0.105023	0.291372	0.0509452	0.0269493	0.421199	0.0753754	0.364414	0.0360127	0.0233356	1.00305	0.130888	0.482647	0.052325	0.0356137	0.212401	0.0395184	0.274747	0.0585845	0.0392445	0.381901	0.032017	0.183347	0.0330916	0.0161058	0	0	0	1	0	0	0.200906	0.799094	0	0	0	0	0	0	0	0	1	0	0	0	0
chr1	88461582	88462312	0.137023	0.0156742	0.175226	0.352908	0.0653324	0.0284581	0.349082	0.119515	0.517405	0.0115896	0.0371298	0.986307	0.155522	0.384476	0.0535922	0.0310496	0.292824	0.0364404	0.268505	0.051987	0.0289547	0.120503	0.0327003	0.257955	0.0531462	0.012986	0	0	0	1	0	0	0.024658	0.975342	0	0	0	0	0	0	0	0	1	0	0	0	0
chr1	88483509	88483907	0.622572	0.202494	0.145469	0.071851	0.0664743	0.0361887	0.599726	3.13762	0.31878	0	0.0778453	0.732643	2.21521	0.701513	0.0674285	0.0269932	0.622844	2.34565	0.102432	0.106903	0.0612409	0.24994	2.1167	0.0648896	0.0485968	0.0410163	1	0	0	0	0	0	0	0	0	1	0	0	0	0	0	0	0	0	1	0	0
chr1	88507196	88508196	0.186094	0.49251	0.220259	0.764973	0.0837745	0.0404953	0.296751	0.174807	0.547	0.0657501	0.0551945	0.968913	0.200139	0.639556	0.0978643	0.0704507	0.255099	0.0373588	0.167245	0.0691499	0.0672394	0.10305	0.0581906	0.340503	0.0832162	0.0583372	0	1	0	1	0	0	1	0	0	0	0	0	0	0	0	0	1	0	0	0	0
chr1	88596681	88597582	0.195206	0.00993865	0.341213	0.284189	0.0698656	0.0299842	1.04588	0.270638	0.0780991	0.135564	0.0581268	1.21013	0.275944	0.133211	0.0497144	0.110147	0.612975	0.090828	0.0781984	0.0560864	0.0519791	0.398003	0.110525	0.0978667	0.0875429	0.0662619	0	0	1	1	0	0	0	0	0.556049	0.443951	0	0	0	0	0	0	0	0.132075	0.867925	0	0
chr1	88812910	88813333	0.143896	0.148187	0.199098	0.5461	0.215212	0.0216279	0.568371	0.120326	0.0730304	0.0573535	0.0272241	0.795206	0.166933	0.117584	0.0452745	0.0564928	0.861742	0.132936	0.101266	0.0489614	0.0212524	0.249887	0.0380932	0.0956251	0.0509061	0.0309782	0	0	0	1	0	0	0	0	1	0	0	0	0	0	0	0	0	1	0	0	0
chr1	88975520	88976153	0	0.0141465	0.152368	0.292727	0.0851564	0.0417782	0.427079	0.315719	0.120335	0.209157	0.162003	0.557588	0.301032	0.128201	0.094823	0.145853	0.317425	0.162383	0.186172	0.105391	0.210836	0.292022	0.223343	0.0875035	0.113946	0.186213	0	0	0	1	0	0	0	0	0	0.758294	0	0	0	0	0.241706	0	0	0	1	0	0
chr1	89021699	89022552	0.152883	0.104979	0.222292	0.0837821	0.074472	0.0388126	0.166117	0.162011	0.0576715	0.383762	0.0584007	0.197508	0.265546	0.0728729	0.373965	0.0948806	0.110989	0.0506124	0.0362024	0.194647	0.069098	0.0932616	0.077302	0.0232104	0.464762	0.115435	0	0	1	0	0	0	0	0	0	0	0	0	0.352872	0.647128	0	0	0	0	0	0	0
chr1	89110183	89110581	0.919286	0.315614	0.072116	0.0868569	0.0489617	0.0316902	0.180048	2.88406	0.054658	0.0130218	0.057613	0.152569	1.87771	0.0741946	0.0452532	0.0417072	0.337941	2.39221	0.0511065	0.0421271	0.0244489	0.1186	2.01768	0.0358635	0.0256853	0.0128948	1	0	0	0	0	0	0	0	0	0.042714	0.957286	0	0	0	0	0	0	0	0.042714	0.957286	0
chr1	89148500	89149288	0.226521	0.193186	0.191842	0.413515	0.099976	0.0397631	0.249262	0.147649	0.0493326	0.553925	0.040558	0.820138	0.236862	0.0654281	0.353391	0.0551761	0.259112	0.0413379	0.046391	0.147568	0.0442516	0.447555	0.111127	0.0549308	0.256	0.0396099	0	0	0	1	0	0	0	0	0	0	0	0	0	0.492386	0.507614	0	0	0	0	0	0
chr1	89221248	89221646	0.948683	0	0.0818093	0.0389139	0.0695349	0.0237739	0.301489	0.107683	0.0573408	0.0729223	0.0376557	0.367144	0.13816	0.0781183	0.167492	0.0723418	0.095628	0.0627063	0.0523507	0.175698	0.0473611	0.411764	0.0622917	0.133088	0.0741191	0.053925	1	0	0	0	0	0	0	0	0	0	0	0	1	0	0	0	0	0.61809	0	0	0
chr1	89223487	89223885	0.764416	0	0.0805031	0.049469	0.0211453	0.0129592	0.0831694	3.18757	0.0449168	0.0168932	0.0432736	0.174064	2.46367	0.064474	0.0335768	0.0237117	0.136075	2.25803	0.0385555	0.0559874	0.0307703	0.0620638	1.86341	0.0388568	0.0230611	0.00530227	1	0	0	0	0	0	0	0	0	0	1	0	0	0	0	0	0	0	0.28392	0.71608	0
chr1	89513240	89513806	0.0947554	0.0474633	0.163637	0.291162	0.0772145	0.0334994	0.55001	0.0730792	0.0742407	0.233718	0.0594079	1.14856	0.177474	0.132834	0.184441	0.0636424	0.481834	0.04072	0.0556167	0.126796	0.0561792	0.197668	0.0668365	0.0919533	0.0869892	0.0543457	0	0	0	1	0	0	0	0	0.989399	0	0	0	0.010601	0	0	0	0	0.989399	0	0	0
chr1	89516730	89517128	0.5394	0.202494	0.0723223	0.0674001	0.0658353	0.0378724	0.681192	2.33044	0.0953161	0.0493422	0.0641934	0.728022	1.72913	0.139235	0.0714514	0.0372824	1.0289	0.951405	0.107873	0.0986062	0.0479108	0.340038	1.81682	0.0652601	0.0391467	0.0208899	1	0	0	0	0	0	0	0	0	1	0	0	0	0	0	0	0	0	1	0	0
chr1	89519226	89519913	0.224114	0.195518	0.368482	0.17269	0.0793269	0.042236	1.67229	1.04805	1.05814	0.0734005	0.0545092	1.59825	0.585488	0.951647	0.0725788	0.0323676	0.734133	0.0739373	0.247822	0.0700334	0.0575535	0.792109	0.832223	0.545138	0.0433884	0.0286752	0	0	1	0	0	0	0	0	0	1	0	0	0	0	0	0	0.253275	0	0.746725	0	0
chr1	89520319	89521210	0.115374	0.0402007	0.428723	0.127244	0.0806411	0.0325883	1.45633	0.302195	0.946164	0.0318189	0.039116	1.51361	0.36054	0.898501	0.0766839	0.0317374	1.29429	0.118506	0.182886	0.0745014	0.044856	0.84631	0.498807	0.485926	0.0340435	0.0203614	0	0	1	0	0	0	0	0.909091	0	0.090909	0	0	0	0	0	0	0.23569	0	0.76431	0	0
chr1	89528708	89529342	0.104425	0	0.349701	0.131963	0.07526	0.0294016	1.27364	0.356434	0.294167	0.0534662	0.0417655	1.47029	0.282879	0.441389	0.0453102	0.020321	1.30305	0.153861	0.10102	0.0908012	0.029449	0.78747	0.152447	0.523048	0.0343483	0.0406049	0	0	1	0	0	0	0	0	0.460568	0.539432	0	0	0	0	0	0	0.460568	0	0.539432	0	0
chr1	89533917	89535830	0.151525	0.0327668	0.35534	0.261243	0.234352	0.0347154	1.24099	0.237292	1.10499	0.0572737	0.0295512	1.22194	0.183449	1.02896	0.074605	0.0317268	1.26919	0.293887	0.201811	0.0532726	0.0370772	0.880636	0.278135	0.530432	0.030343	0.0200442	0	0	1	1	1	0	0	1	0	0	0	0	0	0	0	0	1	0	0	0	0
chr1	89536902	89537300	0.936304	0.0587482	0.123264	0.119413	0.067584	0.106589	0.342588	0.121723	1.62626	0.085944	0.0356325	0.655764	0.114655	1.20568	0.124908	0.0451157	0.631404	0.0617467	0.189633	0.0958725	0.0262728	0.412633	0.551092	0.1487	0.0242576	0.0064266	1	0	0	0	0	0	0	1	0	0	0	0	0	0	0	0	1	0	0	0	0
chr1	89542405	89542803	0.783759	0.0899972	0.234703	0.0721051	0.0706786	0.0266891	1.37229	0.28209	0.2922	0.0357572	0.0197216	1.25138	0.254325	0.457573	0.0386399	0.0163441	0.872611	0.0844437	0.0797226	0.0578735	0.0335438	0.596885	0.159981	0.331971	0.0193354	0.0178223	1	0	0	0	0	0	0	0.51005	0	0.48995	0	0	0	0	0	0	1	0	0	0	0
chr1	89547538	89547567	0.051322	0.677609	0.139638	0.193728	0.0855522	0.0381691	1.30288	0.181198	1.32619	0.140073	0.0797968	1.44453	0.214825	0.857279	0.0948019	0.0337045	1.32084	0.593179	0.166999	0.0620929	0.0493793	0.960305	0.216634	0.660093	0.0813627	0.0276218	0	1	0	0	0	0	0	1	0	0	0	0	0	0	0	0	1	0	0	0	0
chr1	89595737	89597046	0.206857	0.110784	0.134173	0.116075	0.0695657	0.10267	0.27967	0.152531	1.86917	0.0594961	0.0344251	0.43217	0.186615	1.6957	0.107544	0.0406565	0.415511	0.0441573	0.315824	0.125319	0.0385205	0.870511	0.155308	0.843247	0.0597563	0.0347878	0	0	0	0	0	1	1	0	0	0	0	0	0	0	0	0.18793	0.81207	0	0	0	0
chr1	89602120	89603697	0.130404	0.0454266	0.101222	0.20592	0.209644	0.0337992	0.288292	0.128462	1.57274	0.0869568	0.0428176	0.572024	0.177086	1.41187	0.0825614	0.0438938	1.37739	0.133538	0.304763	0.0718362	0.0369622	0.294685	0.0654739	1.07696	0.085462	0.0346139	0	0	0	1	1	0	0.746354	0.253646	0	0	0	0	0	0	0	0.112238	0.887762	0	0	0	0
chr1	89608270	89609790	0.252423	0.0589126	0.371215	0.23785	0.288033	0.062781	0.78707	0.139592	1.35768	0.0606735	0.0430243	1.31351	0.174172	1.26819	0.0970903	0.0382945	1.3886	0.221482	0.224835	0.0717459	0.0334644	0.58316	0.126355	0.932971	0.0529709	0.0336622	1	0	1	1	1	1	0	1	0	0	0	0	0	0	0	0	1	0	0	0	0
chr1	89652444	89652842	0.584661	0.109997	0.0891651	0.0160234	0.0588166	0.0362137	0.08016	2.78307	0.0458284	0.0509612	0.0249663	0.0546304	2.32197	0.0525282	0.0200559	0.0529279	0.127745	2.3373	0.0741989	0.0643114	0.042901	0.0483877	1.85448	0.0356439	0.011952	0.00860579	1	0	0	0	0	0	0	0	0	0	1	0	0	0	0	0	0	0	0	1	0
chr1	89660220	89661235	0.0983967	0.105869	0.64182	0.194924	0.0725568	0.0351241	1.15969	0.239821	1.14222	0.063343	0.0318571	1.05202	0.193579	1.0989	0.0781735	0.0356554	0.627013	0.0711885	0.896659	0.0726996	0.0384502	0.368287	0.0495688	0.756703	0.0435498	0.0124421	0	0	1	1	0	0	0	1	0	0	0	0	0	0	0	0	1	0	0	0	0
chr1	89666878	89667586	0.266396	0.0379436	0.130701	0.255999	0.0740052	0.0857198	0.293131	0.130783	1.47843	0.0881586	0.0579277	1.20807	0.187233	1.03434	0.0626376	0.0478075	0.659399	0.0576215	0.993567	0.0551697	0.0517728	0.63832	0.260578	0.395324	0.0322411	0.0232913	0	0	0	1	0	1	0.545198	0.454802	0	0	0	0	0	0	0	0	1	0	0	0	0
chr1	89774439	89774837	0.495941	0.0199994	0.0826342	0.0520125	0.0511143	0.0466932	0.451382	0.074494	0.130883	0.0287185	0.0105286	0.545293	0.0758242	0.140125	0.0342441	0.0130414	0.215972	0.0188053	0.0834136	0.0558231	0.0111188	0.341082	0.432807	0.120085	0.0164119	0.00460826	1	0	0	0	0	0	0	0	1	0	0	0	0	0	0	0	0	1	0	0	0
chr1	89831622	89832020	0.907035	0.123121	0.175374	0.116996	0.0841216	0.0483686	1.35023	0.21176	0.962398	0.0789757	0.0291502	1.53529	0.248964	0.842624	0.0463522	0.035504	0.252513	0.0631863	0.405311	0.062589	0.0247487	0.864637	0.18163	0.782972	0.0579656	0.0220974	1	0	0	0	0	0	0	1	0	0	0	0	0	0	0	0	1	0	0	0	0
chr1	89842920	89843318	0.700453	0.131871	0.138457	0.182362	0.092508	0.0537047	0.303495	0.0962624	1.6627	0.0845363	0.0382253	0.724254	0.227196	1.17055	0.063484	0.0439513	0.175893	0.0524574	0.595873	0.083352	0.0454871	0.821508	0.171599	0.569451	0.0459589	0.0141995	1	0	0	0	0	0	0.798995	0.201005	0	0	0	0	0	0	0	0	1	0	0	0	0
chr1	89844247	89844645	0.613416	0.0449987	0.113983	0.103135	0.112038	0.0518453	0.530843	0.195939	1.92671	0.124376	0.0643113	1.00865	0.263837	1.28976	0.1117	0.039463	0.309387	0.0606938	0.775786	0.0853202	0.0384161	1.10669	0.468969	0.630923	0.0551233	0.026789	1	0	0	0	0	0	0	1	0	0	0	0	0	0	0	0	1	0	0	0	0
chr1	89856669	89857067	1.62232	0.134996	0.224735	0.0447637	0.0663734	0.0341196	0.928664	1.2348	0.170642	0.0337863	0.0329806	1.67308	0.446691	0.244831	0.0343619	0.0336833	1.60731	0.130557	0.394086	0.0564928	0.0286465	0.686556	0.725379	0.0960983	0.0533015	0.00759251	1	0	0	0	0	0	0	0	0	1	0	0	0	0	0	0	0	0.497487	0.502513	0	0
chr1	89857563	89859163	2.48405	0.520493	1.61723	0.779226	0.284541	0.077083	1.02797	0.318429	0.174635	0.046364	0.0268839	1.22525	0.186291	0.228753	0.0383051	0.0264685	1.3325	0.285568	0.27495	0.0416852	0.0328105	0.643736	0.251161	0.180054	0.0446366	0.018075	1	1	1	1	1	1	0	0.226875	0.5	0.273125	0	0	0	0	0	0	0.226875	0.648125	0.125	0	0
chr1	89999208	90000599	0.136404	0.0193128	0.979917	0.104939	0.0516609	0.0305289	1.04155	0.178969	0.0383394	0.150686	0.0344753	0.700979	0.160946	0.0409535	0.260978	0.0651313	0.17255	0.137689	0.0406256	0.119695	0.0393774	0.295648	0.096818	0.0643306	0.309628	0.0558391	0	0	1	0	0	0	0	0	1	0	0	0	0	0	0	0	0	0.575126	0	0	0
chr1	90005473	90006254	0.0342366	0.0229314	0.33086	0.144647	0.0510732	0.0267235	0.924565	0.174835	0.0361895	0.0565672	0.036507	0.683496	0.123384	0.039981	0.0634333	0.0472445	0.59329	0.0673269	0.047197	0.0616038	0.0239889	0.352509	0.12163	0.0425278	0.0614762	0.0403116	0	0	1	1	0	0	0	0	1	0	0	0	0	0	0	0	0	1	0	0	0
chr1	90030994	90032138	0.103541	0.0195689	0.897545	0.116712	0.048851	0.0323262	0.837862	0.168727	0.0360831	0.21006	0.0511309	0.690136	0.164432	0.0361976	0.272087	0.059572	0.169961	0.121922	0.0506813	0.105931	0.0287076	0.32856	0.114443	0.0595954	0.271788	0.0444556	0	0	1	0	0	0	0	0	1	0	0	0	0	0	0	0	0	0.645105	0	0	0
chr1	90036890	90037719	0.0247633	0	0.248497	0.0903594	0.0463183	0.0266039	0.84231	0.115302	0.0289672	0.0490338	0.0217468	0.616179	0.12059	0.0499453	0.0679853	0.0343652	0.50741	0.0641899	0.0470635	0.0423466	0.0271043	0.326837	0.0989949	0.0503949	0.0521719	0.0247563	0	0	1	0	0	0	0	0	0.856454	0.143546	0	0	0	0	0	0	0	0.856454	0.143546	0	0
chr1	90103337	90104454	0.10246	0.0160335	0.143004	0.107662	0.277871	0.0296332	0.120866	0.106731	0.0191134	0.112309	0.043842	0.331619	0.130279	0.0613858	0.17315	0.133188	1.00648	0.261648	0.204732	0.0512213	0.038478	0.182705	0.0507057	0.0858105	0.0760646	0.0664702	0	0	0	0	1	0	0	0	0	0	0	0	1	0	0	0	0	0.764548	0	0	0
chr1	90378338	90380185	0.21832	0.208475	0.579241	0.364516	0.106418	0.0538971	1.31798	0.354423	0.0537038	0.0499165	0.0380695	1.33853	0.327532	0.0538175	0.0546728	0.0289326	1.48844	0.211084	0.125308	0.0587668	0.0197839	0.339629	0.243395	0.0375544	0.177866	0.0450862	0	1	1	1	0	0	0	0	0.458581	0.541418	0	0	0	0	0	0	0	0.242014	0.757986	0	0
chr1	90388174	90389321	0.1192	0.0234212	0.985058	0.268512	0.169679	0.0300354	1.2301	0.390414	0.0504764	0.031214	0.049593	1.31743	0.290629	0.0472234	0.067352	0.0445401	1.44906	0.443649	0.105628	0.0852212	0.044685	0.452354	0.152253	0.0633606	0.133703	0.0802595	0	0	1	1	1	0	0	0	0.105493	0.894507	0	0	0	0	0	0	0	0.12816	0.87184	0	0
chr1	90484020	90484418	1.1354	0.134996	0.157294	0.108476	0.0645011	0.0338598	0.5306	0.119234	0.0252258	0.253327	0.0668845	0.8706	0.209555	0.0257653	0.191963	0.0631959	0.130244	0.0233633	0.0284381	0.114845	0.0240741	0.628664	0.306068	0.030289	0.201077	0.0558822	1	0	0	0	0	0	0	0	1	0	0	0	0	0	0	0	0	1	0	0	0
chr1	90551400	90551798	0.932953	0.0224993	0.0784405	0.0771923	0.054444	0.0322765	0.315655	0.144479	0.0228296	0.0879148	0.0747221	0.318344	0.152555	0.0407849	0.187862	0.0605495	0.238667	0.0396896	0.026565	0.0983195	0.0336937	0.715028	0.22833	0.0357949	0.114883	0.0301619	1	0	0	0	0	0	0	0	1	0	0	0	0	0	0	0	0	0	0	0	0
chr1	90850166	90850664	0.248263	0	0.146257	0.240059	0.0790213	0.0514432	0.150187	0.141924	0.0419965	0.0882625	0.601399	0.0751181	0.188272	0.0352674	0.101378	0.532216	0.12416	0.0375461	0.0414342	0.105483	0.146581	0.103875	0.0779086	0.0122242	0.135434	0.100315	0	0	0	1	0	0	0	0	0	0	0	1	0	0	0	0	0	0	0	0	1
chr1	91656125	91656582	0.0555895	0	0.0487356	0.0787446	0.100142	0.0616471	0.0641457	0.0911076	0.00998079	0.024459	0.263859	0.0360414	0.109825	0.0213234	0.0657646	0.262869	0.0666328	0.0176426	0.0376739	0.0492233	0.0295505	0.0371179	0.0354912	0.0376308	0.109395	0.0440377	0	0	0	0	0	1	0	0	0	0	0	1	0	0	0	0	0	0	0	0	1
chr1	91683324	91683722	0.516315	0.0674979	0.155231	0.0475615	0.0950528	0.0418515	0.104509	0.201113	0.0314379	0.119589	0.669179	0.0570496	0.236608	0.0453555	0.074081	0.598402	0.12201	0.0710628	0.0795174	0.133954	0.062203	0.616676	0.162562	0.073526	0.1995	0.0611149	1	0	0	0	0	0	0	0	0	0	0	1	0	0	0	0	0	0	0	0	1
chr1	91753553	91754071	0.205982	0.0172871	0.0669247	0.0389861	0.103287	0.0679681	0.043419	0.0891048	0.0392743	0.105298	0.3327	0.0248649	0.124387	0.0276695	0.0573567	0.253385	0.0534247	0.0368645	0.0449818	0.0680548	0.0121618	0.137125	0.039875	0.0941021	0.0656719	0.0301707	0	0	0	0	0	1	0	0	0	0	0	1	0	0	0	0	0	0	0	0	1
chr1	91795374	91796280	0.901759	0.0593029	0.0848024	0.0482114	0.0688348	0.161631	0.12256	0.185343	0.031351	0.142794	0.756794	0.111623	0.256114	0.0613069	0.0813367	0.54062	0.118234	0.0556435	0.061376	0.0970584	0.0444098	0.821055	0.667367	0.0994919	0.0375954	0.0252133	1	0	0	0	0	1	0	0	0	0	0	1	0	0	0	0	0	0	0	0	1
chr1	91825515	91826150	0.500127	0.155121	0.0484749	0.0418459	0.0560701	0.089767	0.100027	0.155331	0.0459387	0.113734	0.611891	0.0583771	0.175271	0.054624	0.0639838	0.558021	0.101841	0.0452502	0.0280217	1.32306	0.0858509	0.373984	1.7069	0.206142	0.0748269	0.0339813	1	0	0	0	0	1	0	0	0	0	0	1	0	0	0	0	0	0	0	0	1
chr1	91826715	91827113	0.675311	0.0674979	0.0973462	0	0.0652298	0.0157236	0.139466	0.262962	0.056312	0.16133	1.05469	0.0539959	0.201753	0.0504789	0.0664865	0.772006	0.167578	0.096265	0.0249927	1.82139	0.130015	0.152081	2.15187	0.0793611	0.0757642	0.0398226	1	0	0	0	0	0	0	0	0	0	0	1	0	0	0	0	0	0	0	0	1
chr1	92112472	92112870	2.02748	0	0.1586	0.0737586	0.0740869	0.0510828	0.203638	0.11479	0.0526915	0.219119	0.592709	0.076542	0.189423	0.0454633	0.073669	0.451581	0.30682	0.0848165	0.0973732	0.167688	0.0775319	0.211254	0.0960181	0.0616627	0.132193	0.0774935	1	0	0	0	0	0	0	0	0	0	0	1	0	0	0	0	0	0	0	0	1
chr1	92142916	92145364	0.140486	0.0852512	0.0949491	0.0671126	0.205731	0.0342679	0.0972227	0.115149	0.0298458	0.0931642	0.531236	0.0565154	0.190577	0.0459163	0.0688802	0.477025	1.31336	0.3175	0.124141	0.0909116	0.0481014	0.0942639	0.0697641	0.0256893	0.147987	0.0569517	0	0	0	0	1	0	0	0	0	0	0	1	0	0	0	0	0	0	0	0	1
chr1	92177472	92178709	0.152016	0.0434344	0.0987622	0.0449262	0.158318	0.0386959	0.0843372	0.150067	0.0316524	0.133867	0.60837	0.0629076	0.180465	0.0238068	0.0938951	0.477019	0.796888	0.0633009	0.11421	0.223764	0.226543	0.164146	0.0932375	0.0541695	0.140014	0.257863	0	0	0	0	1	0	0	0	0	0	0	1	0	0	0	0	0	0	0	0	1
chr1	92185028	92186679	0.155987	0.148703	0.0819352	0.0850404	0.203405	0.0355152	0.122597	0.167076	0.0328668	0.087505	0.72164	0.0912358	0.202509	0.0436339	0.0834354	0.522404	1.56424	0.624565	0.137956	0.0842055	0.040874	0.316639	0.130122	0.0456503	0.175349	0.11484	0	1	0	0	1	0	0	0	0	0	0	1	0	0	0	0	0	0	0	0	1
chr1	92871524	92871922	0.635208	0.0224993	0.187405	0.0338272	0.0660481	0.0495835	0.220751	0.239755	0.0372462	0.279089	0.761678	0.116162	0.214814	0.0436432	0.102262	0.486534	0.116534	0.0516444	0.0433407	0.157587	0.0414394	0.629548	0.433013	0.0400101	0.0379093	0.0356029	1	0	0	0	0	0	0	0	0	0	0	1	0	0	0	0	0	0	0	0	1
chr1	92895192	92895590	0.48627	0.0899972	0.0696411	0.0169136	0.0704542	0.0177927	0.154726	0.283765	0.0589559	0.146619	0.988866	0.0681938	0.201854	0.0831066	0.0750034	0.579306	0.188784	0.593995	0.0315963	0.84712	0.0753829	0.172743	2.06088	0.0427288	0.366448	0.0940809	1	0	0	0	0	0	0	0	0	0	0	1	0	0	0	0	0	0	0	0	1
chr1	92916374	92916772	0.565831	0	0.090334	0.107459	0.0636938	0.0464922	0.0581213	0.0719823	0.019144	0.0341382	0.321085	0.0772559	0.168988	0.036066	0.078222	0.560591	0.104039	0.0342919	0.0818279	0.077816	0.163109	0.400617	0.0678157	0.107522	0.0856087	0.0288988	1	0	0	0	0	0	0	0	0	0	0	1	0	0	0	0	0	0	0	0	1
chr1	92976834	92977232	0.541848	0.0449987	0.154613	0.109874	0.111299	0.0511415	0.208076	0.225071	0.0535379	0.0865774	0.816856	0.149158	0.287418	0.0497508	0.16445	0.334906	0.252827	0.0690901	0.102076	0.105277	0.0473611	0.798585	0.193781	0.387675	0.0742278	0.0331323	1	0	0	0	0	0	0	0	0	0	0	1	0	0	0	0	0	0	0	0	0.417085
chr1	93084494	93084892	1.09311	0.172495	0.101815	0.145482	0.126737	0.0969469	0.194062	0.102982	0.0462452	0.132048	0.213068	0.530738	0.216626	0.0282865	0.207408	0.111932	0.711154	0.0748613	0.0507237	0.121993	0.0443627	0.716727	0.498928	0.105407	0.0525944	0.0173365	1	0	0	0	0	0	0	0	0	0	0	0	1	0	0	0	0	1	0	0	0
chr1	93144523	93145575	0.167333	0.144706	0.413023	0.179168	0.225671	0.0281777	0.935159	0.168571	0.166006	0.0288401	0.019411	0.808497	0.16015	0.107224	0.0773838	0.0252863	1.18986	0.442316	0.117825	0.0420785	0.0303249	0.543323	0.159082	0.0896631	0.0380313	0.0176391	0	0	1	0	1	0	0	0	1	0	0	0	0	0	0	0	0	1	0	0	0
chr1	93146718	93147116	0.664738	0.341864	0.123745	0.04044	0.0537716	0.0304504	0.102472	2.92167	0.0409838	0.00647572	0.0347682	0.105692	2.073	0.0508968	0.0284942	0.0266545	0.0810714	2.26906	0.0638078	0.0592401	0.0470862	0.0643518	1.72484	0.023726	0.0119657	0.0124228	1	1	0	0	0	0	0	0	0	0	1	0	0	0	0	0	0	0	0	1	0
chr1	93152553	93153016	0.0671734	0	0.0642372	0.0830806	0.0908065	0.059588	0.183541	0.0811798	0.478881	0.00550608	0.0147072	0.188236	0.0560936	0.493042	0.0588226	0.024514	0.158231	0.0398688	0.415624	0.0636722	0.0103096	0.146225	0.022056	0.22758	0.026673	0.0121822	0	0	0	0	0	1	1	0	0	0	0	0	0	0	0	1	0	0	0	0	0
chr1	93194807	93195205	0.607094	0.402487	0.129795	0.0582436	0.0455195	0.0337508	0.479683	2.31223	0.375926	0.21581	0.113596	0.1745	0.212323	0.527102	0.0670164	0.193271	0.237916	2.27635	0.0673627	0.0781713	0.0769447	0.213195	1.94706	0.0732101	0.0663548	0.0633633	1	0	0	0	0	0	0	0	0	1	0	0	0	0	0	1	0	0	0	0	0
chr1	93269765	93270880	0.120917	0.136529	0.16677	1.2273	0.107302	0.0400265	0.773966	0.190618	1.47507	0.0911287	0.0365865	1.27397	0.189477	1.16927	0.060655	0.063774	1.25372	0.123105	1.07349	0.0634622	0.033655	0.14011	0.0426237	0.834706	0.0426823	0.021052	0	0	0	1	0	0	0	1	0	0	0	0	0	0	0	0	1	0	0	0	0
chr1	93309844	93310242	1.04965	0.116871	0.137701	0.0172951	0.0532218	0.0279791	0.736882	2.30644	0.0573538	0.0543397	0.0348074	0.628398	1.31886	0.0542135	0.0367168	0.0380233	0.674871	1.68963	0.0581475	0.582413	0.0653136	0.30055	1.90213	0.0430583	0.0696863	0.019016	1	0	0	0	0	0	0	0	0	0.60804	0.39196	0	0	0	0	0	0	0	0.60804	0.39196	0
chr1	93429575	93430787	0.223115	0.280758	0.233972	0.680024	0.222918	0.0389686	0.97793	0.157145	0.269164	0.0958088	0.0426761	1.46197	0.223747	0.255628	0.0724589	0.028532	1.59808	0.527475	0.231107	0.0605778	0.0317	0.590552	0.126258	0.1062	0.0796352	0.020379	0	1	1	1	1	0	0.020627	0.330033	0.64934	0	0	0	0	0	0	0.020627	0.330033	0.64934	0	0	0
chr1	93436341	93436407	0.281494	1.52637	0.319218	0.129602	0.269291	0.0435952	1.84776	1.67921	0.0924337	0.109936	0.052238	1.8256	1.02663	0.124802	0.0543178	0.048514	1.49572	1.96937	0.116086	0.0900102	0.0596667	0.919999	1.34717	0.0630092	0.0613328	0.0118858	0	1	0	0	0	0	0	0	0	1	0	0	0	0	0	0	0	0	1	0	0
chr1	93437147	93437545	0.466669	0.122496	0.0918463	0.0523941	0.0426717	0.0305592	0.146277	3.34959	0.0605057	0.0611674	0.0738774	0.144458	2.5941	0.0774169	0.0490014	0.0328576	0.214525	2.41071	0.0850406	0.0686173	0.071785	0.0866053	2.10749	0.057997	0.0363048	0.0184608	1	0	0	0	0	0	0	0	0	0	1	0	0	0	0	0	0	0	0	1	0
chr1	93463731	93464129	0.637271	0	0.0885465	0.0541742	0.0468537	0.0680378	0.368031	0.0925054	0.0406713	0.484976	0.0957993	1.00417	0.280421	0.106567	0.4292	0.304547	0.1708	0.0507515	0.0433544	0.174563	0.0727093	0.422656	0.172593	0.147038	0.0848743	0.209509	1	0	0	0	0	0	0	0	0	0	0	0	0	0.173367	0.826633	0	0	0	0	0	0
chr1	93476893	93477673	0.366689	0.0344413	0.259407	0.0699505	0.0659326	0.0407736	1.07723	0.197822	0.0498519	0.285031	0.0433193	1.43224	0.206842	0.0713136	0.215237	0.0703581	0.40954	0.0474266	0.0326352	0.164921	0.0415181	0.412378	0.104521	0.0329001	0.27869	0.0751385	1	0	1	0	0	0	0	0	1	0	0	0	0	0	0	0	0	1	0	0	0
chr1	93574213	93574560	0.106342	0	0.137517	0.317684	0.0527368	0.0300928	0.246153	0.0941596	0.0533855	0.080249	0.0301001	0.239585	0.0781647	0.0372223	0.201404	0.0976898	0.0814437	0.0422058	0.0229579	0.074077	0.0736948	0.0798724	0.0362654	0.0275753	0.103041	0.0781691	0	0	0	1	0	0	0	0	1	0	0	0	0	0	0	0	0	0	0	0	0
chr1	94011124	94011627	0.182127	0.0712104	0.123589	0.112497	0.119576	0.0653022	0.405022	0.127569	0.505399	0.0256753	0.0751018	0.461715	0.15699	0.295454	0.100371	0.0688495	0.164394	0.0460522	0.130878	0.0494049	0.0584311	0.180984	0.0734246	0.115573	0.152648	0.0538707	0	0	0	0	0	1	0.053678	0.946322	0	0	0	0	0	0	0	0.053678	0.795229	0.151093	0	0	0
chr1	94020779	94021740	0.0903078	0.0838632	0.27965	0.407384	0.0659634	0.0320255	0.513462	0.130903	0.370732	0.0325038	0.0298399	1.12568	0.181214	0.149664	0.052901	0.0202981	0.369459	0.0379917	0.115036	0.0675352	0.0215343	0.209914	0.0456963	0.0965557	0.128463	0.047483	0	0	1	1	0	0	0	1	0	0	0	0	0	0	0	0	0	1	0	0	0
chr1	94026283	94026894	0.157746	0.0879351	0.236311	0.413192	0.0969649	0.027791	0.91196	0.102741	0.361103	0.0533239	0.0382579	0.863213	0.149452	0.185485	0.0393333	0.0112532	0.577469	0.046498	0.125066	0.0396214	0.0323968	0.21082	0.0259224	0.174789	0.105852	0.0352438	0	0	0	1	0	0	0	1	0	0	0	0	0	0	0	0	0.153846	0.846154	0	0	0
chr1	94077314	94077712	0.581566	0.15062	0.0572664	0.0176766	0.0380749	0.0154472	0.24586	3.09727	0.041101	0.00675727	0.0218627	0.190244	1.82275	0.0472296	0.0315556	0.0171487	0.367654	2.37576	0.0428075	0.0495766	0.0191393	0.112151	1.95259	0.0270762	0.019417	0.0148797	1	0	0	0	0	0	0	0	0	0.281407	0.718593	0	0	0	0	0	0	0	0.281407	0.718593	0
chr1	94092138	94092793	0.109931	0	0.131377	0.0969771	0.103102	0.0672916	0.172223	0.128399	0.0529558	1.01169	0.0535916	0.270418	0.174216	0.0502445	0.601938	0.108973	0.084028	0.0471807	0.026435	0.143513	0.0486746	0.122153	0.0665588	0.0415815	0.225153	0.0822583	0	0	0	0	0	1	0	0	0	0	0	0	0	1	0	0	0	0	0	0	0
chr1	94338090	94338715	0.212186	0.143276	0.185445	0.41244	0.100569	0.0297183	0.366419	0.160414	1.64818	0.06719	0.0312092	1.32347	0.24777	0.972795	0.091288	0.0297543	0.714915	0.0677179	0.48763	0.0886877	0.0228404	0.417215	0.0947404	0.59926	0.0887351	0.0252088	0	0	0	1	0	0	0.496	0.504	0	0	0	0	0	0	0	0	1	0	0	0	0
chr1	94362880	94363278	0.554483	0.0543733	0.114739	0.114198	0.110189	0.0433592	0.268112	0.177305	2.2396	0.171888	0.0842686	0.557329	0.37366	1.89557	0.12579	0.0659905	0.237465	0.0544431	1.23156	0.105195	0.0604787	0.248161	0.141519	0.89703	0.133974	0.0286212	1	0	0	0	0	0	1	0	0	0	0	0	0	0	0	0.19598	0.80402	0	0	0	0
chr1	94370135	94370533	0.713997	0.114997	0.0385673	0	0.042683	0.0313215	0.166491	3.08302	0.0437577	0.0347013	0.035436	0.0940517	2.3514	0.0702039	0.0243143	0.0578395	0.293301	2.33341	0.0649973	0.0562469	0.0456245	0.109528	1.81553	0.0348201	0.0412406	0.00935534	1	0	0	0	0	0	0	0	0	0.334171	0.665829	0	0	0	0	0	0	0	0	1	0
chr1	94524739	94525137	0.595105	0	0.0607727	0.0640935	0.0626733	0.039489	0.143236	0.103992	0.0271142	0.265645	0.0244359	0.372081	0.0955038	0.0213295	0.381159	0.0458567	0.0943307	0.0413555	0.0146702	0.15853	0.0398653	0.474991	0.110046	0.0216527	0.112613	0.0537445	1	0	0	0	0	0	0	0	0	0	0	0	0.655779	0.344221	0	0	0	0	0	0	0
chr1	94537037	94537435	0.613673	0.0449987	0.120239	0.071724	0.0406761	0.0398661	1.31433	0.749428	0.662331	0.0216796	0.0467896	1.30552	0.455197	0.610075	0.0253544	0.0200491	0.718469	0.347704	0.153197	0.0657743	0.0468863	0.767914	0.540566	0.171093	0.0812306	0.015768	1	0	0	0	0	0	0	0	0	1	0	0	0	0	0	0	0	0	1	0	0
chr1	94556045	94556443	0.507804	0.0449987	0.115014	0.0974119	0.0561593	0.0292608	0.921034	0.186214	0.0552572	0.107624	0.0364182	0.65023	0.190077	0.0218418	0.191591	0.0304653	0.11652	0.0211109	0.0196059	0.0796885	0.0247237	0.349392	0.0600507	0.0250441	0.228081	0.0305922	1	0	0	0	0	0	0	0	1	0	0	0	0	0	0	0	0	0	0	0	0
chr1	94572686	94573084	0.794588	0.0449987	0.13172	0.0676541	0.0630772	0.0462578	0.153389	0.131213	0.0247961	0.224468	0.042036	0.134405	0.155524	0.0219362	0.242574	0.042808	0.105255	0.0408491	0.0219438	0.105427	0.0478608	0.583634	0.155402	0.0480286	0.204123	0.034215	1	0	0	0	0	0	0	0	0	0	0	0	0	1	0	0	0	0	0	0	0
chr1	94782823	94783221	0.567124	0.097497	0.0847654	0.144465	0.0741654	0.0381824	0.133752	0.196476	0.0676031	0.299923	0.0850934	0.25941	0.415284	0.0320481	0.241848	0.0580089	0.119934	0.067371	0.0461162	0.139244	0.0575177	0.090874	0.074939	0.0273233	0.285081	0.055077	1	0	0	0	0	0	0	0	0	0	0	0	1	0	0	0	0	0	0	0.947236	0
chr1	94803713	94804111	0.524183	0.100622	0.0626287	0.0275958	0.0418421	0.0250556	0.251545	3.33414	0.0578488	0.0516649	0.0284038	0.202321	2.49057	0.049225	0.0135211	0.0420459	0.439782	2.26192	0.0387469	0.0551534	0.0275096	0.259214	1.97989	0.0203346	0.0730584	0.0261088	1	0	0	0	0	0	0	0	0	0	1	0	0	0	0	0	0	0	0.218593	0.781407	0
chr1	94804671	94804994	0.257246	0.0554471	0.0961461	0.291616	0.0852666	0.031214	1.3242	0.70735	0.209655	0.0614932	0.0941059	1.68992	0.515496	0.149386	0.0591463	0.0296871	1.14829	0.464716	0.116782	0.0759936	0.0401319	0.619434	0.35167	0.0812426	0.152869	0.0437502	0	0	0	1	0	0	0	0	0	1	0	0	0	0	0	0	0	0.600619	0.399381	0	0
chr1	94830668	94831066	1.02618	0.36249	0.0956963	0.132384	0.0713627	0.0503037	0.386209	2.72913	0.0820196	0.0320971	0.0733077	0.259093	1.72023	0.0469464	0.058009	0.0418554	0.901959	2.3352	0.070521	0.0824636	0.069636	0.311777	2.09146	0.0562254	0.0590122	0.061601	1	0	0	0	0	0	0	0	0	0.331658	0.668342	0	0	0	0	0	0	0	0.331658	0.668342	0
chr1	94930005	94931133	0.220166	0.0635086	0.10001	0.0596774	0.1331	0.031963	0.147338	0.131202	0.0299138	0.60882	0.0587314	0.16852	0.215715	0.0374055	0.481164	0.0648318	0.9176	0.143214	0.0691671	0.0909007	0.0464956	0.088717	0.0714675	0.0251675	0.257633	0.0458649	0	0	0	0	1	0	0	0	0	0	0	0	0	1	0	0	0	0	0	0	0
chr1	94942045	94943548	0.149288	0.0860586	0.150115	0.055766	0.135308	0.0404722	0.179247	0.147129	0.0385241	0.374683	0.0594121	0.352685	0.246674	0.0350741	0.283981	0.0754482	0.99265	0.106063	0.0732738	0.133304	0.0414484	0.134114	0.0855776	0.0294503	0.300007	0.0646345	0	0	0	0	1	0	0	0	0	0	0	0	0.236194	0.763806	0	0	0	0	0	0	0
chr1	95023595	95024030	0.18417	0.0411711	0.151777	0.0464248	0.0769356	0.058158	0.0374914	0.0731665	0.0150492	0.207694	0.0265989	0.0611053	0.0959919	0.029976	0.201185	0.0301984	0.05035	0.0407767	0.0228293	0.0581662	0.00948725	0.0218911	0.0285743	0.0198361	0.133564	0.0202306	0	0	0	0	0	1	0	0	0	0	0	0	1	0	0	0	0	0	0	0	0
chr1	95084108	95085216	0.208021	0.0469198	0.237141	0.109952	0.0885527	0.0490657	0.181314	0.149841	0.0592374	0.392228	0.0618025	0.189412	0.313423	0.0564941	0.319282	0.0779644	0.118844	0.060244	0.0455506	0.17683	0.0678788	0.135175	0.113066	0.0297548	0.360999	0.0475255	0	0	1	0	0	0	0	0	0	0	0	0	0.263538	0.736462	0	0	0	0	0	0	0
chr1	95240042	95240440	1.16441	0.224993	0.0679909	0.0385325	0.0409564	0.029043	0.128676	3.0593	0.0561819	0.0280848	0.0313306	0.0708906	2.26924	0.0489284	0.0490799	0.0324554	0.108874	2.41115	0.0402098	0.075875	0.0357176	0.057768	1.88512	0.0258542	0.0247199	0.0276218	1	0	0	0	0	0	0	0	0	0	1	0	0	0	0	0	0	0	0	1	0
chr1	95273942	95274340	0.534755	0.0899972	0.153994	0.185922	0.0587269	0.0396484	0.532606	0.139155	0.0686843	1.07905	0.0830506	1.32933	0.251254	0.0941221	0.499434	0.0486724	0.298655	0.0318929	0.0504639	0.160239	0.0366421	0.637228	0.105237	0.0499646	0.157185	0.0256924	1	0	0	0	0	0	0	0	0	0	0	0	0	0	1	0	0	0	0	0	0
chr1	95374055	95375026	0.293344	0.0527712	0.0780829	0.243112	0.0577109	0.0234482	0.237733	2.01918	0.0579229	0.0138486	0.028655	0.216965	1.41975	0.0890624	0.0328181	0.0212779	0.391882	1.92378	0.0749313	0.0467148	0.0372993	0.0973353	1.60642	0.0406107	0.0200529	0.0106562	1	0	0	1	0	0	0	0	0	0.149331	0.850669	0	0	0	0	0	0	0	0	1	0
chr1	95375447	95375845	0.755004	0.14437	0.0598788	0.0357347	0.0496007	0.0250472	0.142385	3.11602	0.0307086	0.00992473	0.0319984	0.184415	2.60213	0.0831066	0.0332041	0.0401193	0.234898	2.53276	0.0627554	0.0572038	0.0468114	0.0728359	1.90716	0.0336805	0.0250191	0.0267196	1	0	0	0	0	0	0	0	0	0.113065	0.886935	0	0	0	0	0	0	0	0.113065	0.886935	0
chr1	95465790	95466188	0.658031	0	0.117833	0.0410758	0.0711271	0.0462241	0.135728	0.0933001	0.489254	0.0681358	0.0346503	0.288956	0.121123	0.445789	0.0918605	0.0580089	0.0693007	0.0491655	0.108735	0.0665669	0.0503721	0.278162	0.0324542	0.111902	0.130888	0.0574506	1	0	0	0	0	0	1	0	0	0	0	0	0	0	0	1	0	0	0	0	0
chr1	95520819	95521750	0.630363	0.336643	0.127785	0.703751	0.0865228	0.0794225	0.30892	0.162002	1.63798	0.0978852	0.0389888	1.80237	0.285879	1.26585	0.0732215	0.0334601	0.491146	0.0447938	0.841955	0.0780026	0.0425443	0.924862	0.32304	0.483238	0.0693935	0.0183354	1	1	0	1	0	0	1	0	0	0	0	0	0	0	0	0	1	0	0	0	0
chr1	95527322	95527841	0.163459	0.029715	0.177349	0.317627	0.0808106	0.0297301	0.601101	0.0945467	0.573558	0.0576483	0.035851	1.05918	0.233436	0.559242	0.0453726	0.0248887	0.748274	0.0909919	0.262524	0.0466449	0.0163729	0.570074	0.132484	0.392024	0.0446807	0.0173395	0	0	0	1	0	0	0	1	0	0	0	0	0	0	0	0	1	0	0	0	0
chr1	95530406	95530951	0.167621	0.049292	0.0754573	0.326063	0.0712244	0.0345026	0.651741	0.233957	0.571848	0.0488326	0.0402946	1.15012	0.362742	0.690158	0.0640453	0.0241806	0.822508	0.333417	0.252347	0.0603308	0.0290761	0.613443	0.48207	0.311135	0.0528662	0.0190667	0	0	0	1	0	0	0	0.722936	0.277064	0	0	0	0	0	0	0	0	0	1	0	0
chr1	95576296	95577225	0.270753	0.0867518	0.0951023	0.130974	0.0899703	0.0559465	0.226589	0.116622	0.0368683	0.380684	0.0602881	0.309909	0.187985	0.0439222	0.301075	0.131589	0.118366	0.044502	0.0369074	0.144571	0.0466126	0.284581	0.0873163	0.0409114	0.196727	0.0823063	1	0	0	0	0	1	0	0	0	0	0	0	0	1	0	0	0	0	0	0	0
chr1	95638198	95639212	0.117575	0.0088311	0.552329	0.183237	0.0583922	0.0270077	0.937858	0.257676	0.150558	0.0132613	0.0321892	1.05499	0.209357	0.167169	0.0349619	0.0182816	0.904791	0.0560986	0.148756	0.0506514	0.0280239	0.452514	0.0755176	0.152956	0.0317125	0.0355869	0	0	1	0	0	0	0	0	0.408284	0.591716	0	0	0	0	0	0	0	0.802761	0.197239	0	0
chr1	95652554	95653309	0.082455	0	0.410966	0.183684	0.126568	0.0223403	0.541499	0.287869	0.157013	0.0267158	0.0210825	0.553894	0.272381	0.288823	0.0334037	0.0127675	0.525146	1.54648	0.257344	0.0371012	0.0223651	0.321971	0.156478	0.0871887	0.0158768	0.00831946	0	0	1	0	1	0	0	0.144371	0	0.855629	0	0	0	0	0	0	0.144371	0	0.855629	0	0
chr1	95665421	95665842	0.0655849	0	0.0547228	0.0319791	0.0728696	0.0585871	0.0548023	0.0530313	0.507573	0.0806498	0.0554311	0.0766158	0.0789856	0.844272	0.0433561	0.0489355	0.175256	0.0347746	0.70238	0.0536909	0.0548009	0.0499568	0.0291007	0.405229	0.0324833	0.0592062	0	0	0	0	0	1	1	0	0	0	0	0	0	0	0	1	0	0	0	0	0
chr1	95679613	95680442	0.0521268	0	0.313814	0.162952	0.0523628	0.0276054	0.621707	0.11961	0.612826	0.0713712	0.0409192	0.399073	0.1221	1.09571	0.082306	0.0514918	0.101858	0.041872	0.995058	0.0670146	0.0452478	0.109697	0.0450685	0.611507	0.0818876	0.0468737	0	0	1	0	0	0	0	1	0	0	0	0	0	0	0	0	1	0	0	0	0
chr1	95698262	95699149	0.619683	0.131242	0.247857	0.038916	0.052888	0.0250222	0.345755	1.6607	0.0494421	0.0221716	0.0311218	0.245947	1.28112	0.051126	0.0246375	0.0245469	0.479733	1.92604	0.0798989	0.0597683	0.0215874	0.207679	1.5009	0.0374517	0.0209636	0.0150845	1	0	1	0	0	0	0	0	0	0.393461	0.606539	0	0	0	0	0	0	0	0.393461	0.606539	0
chr1	95699205	95699852	0.0260973	0	0.227391	0.349601	0.118626	0.0282595	0.945176	0.464269	0.0446301	0.0123835	0.0186084	0.754256	0.590151	0.0392794	0.0263646	0.0168392	0.977584	0.628835	0.0677458	0.0324223	0.0209187	0.474742	0.480241	0.0334637	0.0278533	0.00409844	0	0	0	1	0	0	0	0	0	1	0	0	0	0	0	0	0	0	1	0	0
chr1	95700201	95700599	0.620247	0.364989	0.0635226	0.0563364	0.0458671	0.0326786	0.290972	2.40547	0.0459847	0.00971358	0.0391092	0.276245	1.5918	0.0622089	0.0135211	0.0248338	0.385133	2.1696	0.0424383	0.0484694	0.0512338	0.119029	1.57005	0.0236848	0.0350539	0.00144355	1	0	0	0	0	0	0	0	0	0.5	0.5	0	0	0	0	0	0	0	0.5	0.5	0
chr1	95721777	95722175	1.2561	0.202494	0.160456	0.0832963	0.0670013	0.0495582	0.376785	3.35219	0.0929593	0.0270995	0.0505808	0.557329	2.51986	0.100499	0.0404257	0.0392513	0.653159	2.40988	0.110375	0.0844726	0.0615904	0.205085	2.18874	0.0420285	0.0551369	0.0285518	1	0	0	0	0	0	0	0	0	1	0	0	0	0	0	0	0	0	1	0	0
chr1	95876603	95877127	0	0.0512675	0.0736775	0.0899261	0.0597211	0.0777455	0.133291	0.0963187	0.385289	0.188403	0.0506971	0.245169	0.141963	0.362231	0.145923	0.020004	0.0868943	0.0274836	0.138582	0.0758505	0.0442661	0.357879	0.129674	0.147222	0.0755472	0.0275901	0	0	0	0	0	1	1	0	0	0	0	0	0	0	0	0.242366	0.757634	0	0	0	0
chr1	95887429	95888213	0	0.0571092	0.259829	0.0675924	0.0693756	0.0357983	0.622793	0.140229	0.0365734	0.117811	0.0357192	1.35337	0.201315	0.0500811	0.0645255	0.0272559	0.111393	0.0344446	0.0178446	0.100469	0.0453969	0.36099	0.080975	0.0626414	0.136529	0.0541232	0	0	1	0	0	0	0	0	1	0	0	0	0	0	0	0	0	1	0	0	0
chr1	95931908	95932306	1.2227	0.097497	0.151794	0.0535385	0.0786839	0.0820694	0.288631	0.137438	0.0452945	0.282961	0.0699488	0.450409	0.269877	0.0472565	0.209017	0.0817841	0.193796	0.078473	0.0114026	0.103705	0.0165158	0.501888	0.557258	0.0324035	0.100525	0.0178778	1	0	0	0	0	0	0	0	0	0	0	0	1	0	0	0	0	1	0	0	0
chr1	96732458	96733112	0.13835	0	0.211361	0.0308789	0.0474883	0.0290072	0.150195	0.0759448	0.0434153	0.0753478	0.13508	0.51614	0.154573	0.104671	0.0683351	0.0864132	0.0799263	0.0290119	0.0259678	0.0707221	0.0387894	0.146339	0.0399505	0.0326877	0.0512211	0.0631755	0	0	1	0	0	0	0	0	0	0	0	0	1	0	0	0	0	1	0	0	0
chr1	96754784	96755740	0.169159	0	0.489042	0.125316	0.0896093	0.0401445	0.212977	0.157122	0.0633642	0.0608935	0.302822	0.906036	0.192304	0.226026	0.0785125	0.23988	0.443652	0.0400936	0.0666074	0.0734422	0.122735	0.386247	0.138149	0.0730697	0.097298	0.141663	0	0	1	0	0	0	0	0	0	0	0	0.853557	0.146444	0	0	0	0.435146	0.564854	0	0	0
chr1	96974473	96974871	0.548941	0	0.0814656	0.107586	0.0587269	0.0341196	0.0997972	0.10865	0.00998877	0.0876333	0.0579273	0.122844	0.148502	0.0529866	0.0944707	0.0672607	0.0414164	0.0292141	0.0233657	0.0864409	0.0763326	0.0620904	0.0459374	0.0420834	0.0569455	0.0767162	1	0	0	0	0	0	0	0	0	0	0	0	1	0	0	0	0	0	0	0	0
chr1	97364653	97365051	0.595746	0.0224993	0.0488793	0.0654924	0.0489617	0.0450179	0.497953	0.0999765	0.0229077	0.229184	0.0569451	0.45955	0.13217	0.0465015	0.0847171	0.0430833	0.0626915	0.0306001	0.012387	0.0686309	0.0977703	0.399171	0.125795	0.149359	0.0304988	0.0408081	1	0	0	0	0	0	0	0	1	0	0	0	0	0	0	0	0	1	0	0	0
chr1	97466057	97466867	0.148517	0	0.291821	0.111975	0.0407388	0.0269975	0.542998	0.0973201	0.0388741	0.0426098	0.0243707	0.330798	0.111771	0.0578077	0.0539014	0.0539271	0.0545491	0.025317	0.0165866	0.0422721	0.0545592	0.1638	0.0307147	0.0661765	0.0589543	0.033835	0	0	1	0	0	0	0	0	1	0	0	0	0	0	0	0	0	1	0	0	0
chr1	97551935	97552766	0.362157	0.0107758	0.414701	0.148917	0.0399724	0.0299462	0.431498	0.11159	0.171127	0.049489	0.0140177	0.467945	0.151915	0.0501738	0.0304333	0.0216889	0.0728692	0.029988	0.0184134	0.0674487	0.021295	0.0773884	0.0254651	0.0834891	0.0893812	0.0322753	1	0	1	0	0	0	0	0	1	0	0	0	0	0	0	0	0	1	0	0	0
chr1	97564114	97564512	1.10265	0.202494	0.19373	0.0951231	0.0706675	0.0352421	0.422687	3.09949	0.0603621	0.100726	0.0582416	0.456	2.24586	0.0647031	0.0394641	0.0453697	0.451129	0.65821	0.0442158	0.517663	0.0700482	0.423379	2.01252	0.0351359	0.376931	0.0559656	1	0	0	0	0	0	0	0	0	0.78392	0.21608	0	0	0	0	0	0	0	0.78392	0.21608	0
chr1	97640941	97641648	0.0908841	0	0.272956	0.0491818	0.0477596	0.0262338	0.744886	0.0951473	0.0492808	0.0117288	0.0143089	0.356911	0.0809493	0.0954888	0.029684	0.0889208	0.0667089	0.0170611	0.019434	0.0432366	0.0237499	0.109884	0.0241415	0.0528612	0.0303424	0.0213551	0	0	1	0	0	0	0	0	1	0	0	0	0	0	0	0	0	1	0	0	0
chr1	97643748	97644461	0.575844	0.0125592	0.706792	0.0060339	0.0295773	0.0197938	0.229209	0.107289	0.0151789	0.0227102	0.0129824	0.163533	0.0356247	0.0201548	0.0270242	0.0214966	0.0691812	0.0119181	0.0138061	0.0177854	0.0152584	0.0745844	0.00384096	0.0195057	0.00245159	0.0132182	1	0	1	0	0	0	0	0	1	0	0	0	0	0	0	0	0	0.914446	0	0	0
chr1	97645133	97646244	0.289778	0	1.36034	0.0522534	0.0397225	0.0267983	0.616968	0.115213	0.0212274	0.00605175	0.0394978	0.267417	0.107543	0.10879	0.0294911	0.103646	0.0518336	0.0184675	0.0192779	0.0540001	0.0337807	0.0914215	0.0244156	0.0424434	0.0486228	0.0357467	1	0	1	0	0	0	0	0	1	0	0	0	0	0	0	0	0	0.780378	0	0	0
chr1	99529021	99529594	0.220962	0	0.106581	0.552067	0.112273	0.0285284	0.134962	0.0827438	0.169933	0.0575446	0.134474	0.476354	0.224493	0.118325	0.0514832	0.121259	0.69292	0.152586	0.529812	0.0755165	0.0221537	0.208257	0.0638322	0.111115	0.0586128	0.0413893	0	0	0	1	0	0	0	0	0	0	0	0	1	0	0	0	0	0.65096	0.34904	0	0
chr1	99557031	99558267	0.333385	0.733347	0.180528	0.266868	0.297477	0.0201202	0.466105	1.81974	0.0451266	0.334339	0.295632	0.225565	1.62807	0.0782165	0.0657755	0.204756	0.14028	2.41292	0.129095	0.0688381	0.0425616	0.245808	1.57378	0.0573172	0.443495	0.0558916	1	1	1	1	1	0	0	0	0.136731	0	0	0	0	0	0.863269	0	0	0	0.377832	0.622168	0
chr1	99639418	99640357	0.229555	0	0.881043	0.136425	0.0701083	0.0337452	0.75705	0.160094	0.518084	0.0355627	0.079495	0.591517	0.167551	0.72463	0.0561118	0.0665744	0.525913	0.061472	0.294555	0.0565684	0.034562	0.39269	0.079855	0.716166	0.034453	0.0107192	0	0	1	0	0	0	0	1	0	0	0	0	0	0	0	0	1	0	0	0	0
chr1	99669150	99669725	0.133259	0.0467203	0.116298	0.323311	0.0828427	0.0478825	0.746655	0.169682	0.280209	0.011693	0.0337054	1.02234	0.171421	0.202381	0.0525267	0.0280919	0.828443	0.146539	0.228146	0.0542881	0.0264004	0.559577	0.306345	0.119719	0.0164705	0.0271991	0	0	0	1	0	0	0	0.695652	0.304348	0	0	0	0	0	0	0	0	1	0	0	0
chr1	99670535	99670933	0.571379	0	0.219923	0.260189	0.0822493	0.0314221	0.514732	0.0918185	0.212525	0.0104174	0.0127483	0.875769	0.145735	0.239667	0.0377764	0.0950584	0.716562	0.0417287	0.205369	0.0431932	0.034081	0.609784	0.0890886	0.152296	0.0550828	0.00660702	1	0	0	0	0	0	0	0.334171	0.665829	0	0	0	0	0	0	0	0	1	0	0	0
chr1	99720658	99721121	0.215153	0	0.233134	0.0954334	0.0636956	0.0332756	0.0915355	0.117626	0.0354764	0.031887	0.0943217	0.102394	0.115692	0.010709	0.125321	0.111887	0.0721078	0.0415987	0.0605385	0.088476	0.0943112	0.125612	0.0625338	0.0779332	0.083654	0.0974696	0	0	1	0	0	0	0	0	0	0	0	0	1	0	0	0	0	0	0	0	0
chr1	100460834	100461239	0.00443524	0	0.0447917	0.0768577	0.0799351	0.0614864	0.0230319	0.0523416	0	0	0.0784497	0.0233063	0.0561635	0.00606828	0.0233347	0.0482473	0.0183576	0.0244918	0.00962006	0.0378259	0.02561	0.0155436	0.0173931	0.0142486	0.0415835	0.0436765	0	0	0	0	0	1	0	0	0	0	0	0	1	0	0	0	0	0	0	0	0
chr1	102763872	102764593	0	0	0.381391	0.0603713	0.0533307	0.0296318	0.0778262	0.0800626	0.0206682	0.0449941	0.199319	0.102915	0.0993121	0.032003	0.0660688	0.188799	0.0682931	0.0223946	0.0398869	0.0763282	0.16629	0.0383373	0.0393008	0.0331897	0.0686186	0.15944	0	0	1	0	0	0	0	0	0	0	0	0	1	0	0	0	0	0	0	0	0
chr1	105677691	105678091	0.213115	0	0.0322181	0.0364418	0.0915098	0.0661223	0.0623071	0.0582506	0.0118307	0.0448932	0.0681527	0.0266755	0.102338	0.0119529	0.0253838	0.0711164	0.0201359	0.0230343	0.0187732	0.0479686	0.045819	0.0145396	0.0161038	0.00991836	0.0352574	0.0555198	0	0	0	0	0	1	0	0	0	0	0	0	1	0	0	0	0	0	0	0	0
chr1	107411091	107411489	0.618313	0	0.076172	0.217333	0.0613391	0.0356442	0.0981253	0.0991819	0.0390303	0.136342	0.0592237	0.15356	0.146742	0.0942434	0.142746	0.114303	0.105105	0.0307334	0.0637806	0.0451615	0.0670127	0.583746	0.0852001	0.171766	0.0419341	0.0827405	1	0	0	0	0	0	0	0	0	0	0	0	1	0	0	0	0	0	0	0	0
chr1	107460859	107461471	0.126376	0	0.289172	0.0935359	0.0488006	0.0307091	0.421055	0.0880257	0.164381	0.0182186	0.013196	0.312914	0.0835317	0.241851	0.039052	0.0351777	0.241715	0.0340278	0.153714	0.0279919	0.026811	0.090522	0.0350188	0.684591	0.0442312	0.0549728	0	0	1	0	0	0	0	0.116013	0.883987	0	0	0	0	0	0	0.883987	0.116013	0	0	0	0
chr1	107550498	107551155	0.24833	0	0.0764205	0.047378	0.0626006	0.0870708	0.150007	0.0918415	0.514361	0.0775624	0.0226446	0.502768	0.116914	0.643543	0.0504882	0.0248038	0.120806	0.028944	0.32592	0.0529112	0.0147048	0.465376	0.252039	0.263851	0.0295792	0.0170776	0	0	0	0	0	1	1	0	0	0	0	0	0	0	0	0.155251	0.844749	0	0	0	0
chr1	107559470	107560220	0.568648	0.350229	0.191931	0.203129	0.0563195	0.0838578	0.204884	2.72796	0.0461513	0.00896464	0.0392981	0.157612	1.601	0.0792178	0.0264513	0.0385804	0.390791	2.28978	0.058326	0.0426001	0.0412098	0.0824086	1.95674	0.0604758	0.0328528	0.0230182	1	0	0	0	0	1	0	0	0	0	1	0	0	0	0	0	0	0	0	1	0
chr1	107560384	107560782	0.737205	0.15687	0.0396672	0.0244166	0.0469996	0.0291184	0.116972	3.37954	0.0689833	0.0168932	0.0414075	0.0782078	2.99182	0.108333	0.0198008	0.0745224	0.107289	2.33367	0.0772478	0.055222	0.0470862	0.0730633	1.9338	0.0794027	0.0526896	0.0226804	1	0	0	0	0	0	0	0	0	0	1	0	0	0	0	0	0	0	0	1	0
chr1	107802363	107802761	2.2739	0	0.0890278	0.0745214	0.0567425	0.0448588	0.153207	0.117495	0.0247179	0.121208	0.0728167	0.123796	0.172284	0.0367671	0.162076	0.0752211	0.11805	0.0166062	0.0326901	0.0624661	0.0518583	0.422335	0.0874773	0.0484542	0.09994	0.0448472	1	0	0	0	0	0	0	0	0	0	0	0	1	0	0	0	0	0	0	0	0
chr1	107886973	107887371	0.586852	0.128746	0.0325861	0.0169136	0.0360456	0.01502	0.1519	3.3725	0.0246789	0.0168932	0.0290128	0.197879	2.20076	0.0282595	0.0122259	0.0331752	0.196021	2.30012	0.0149983	0.052734	0.0302956	0.0310452	1.90348	0.0200874	0.0118024	0.0078979	1	0	0	0	0	0	0	0	0	0	1	0	0	0	0	0	0	0	0.932161	0.067839	0
chr1	107887961	107888359	0.696717	0.211243	0.0792655	0.0178038	0.0539059	0.0235477	0.407244	3.88805	0.0940794	0.0379392	0.0283841	0.534624	2.77263	0.0862753	0.0383063	0.042067	0.884644	2.37244	0.0384051	0.122267	0.0396654	0.145765	2.25522	0.0760659	0.0463124	0.0401696	1	0	0	0	0	0	0	0	0	1	0	0	0	0	0	0	0	0	1	0	0
chr1	107904150	107904484	0.271976	0.0536211	0.124355	0.342475	0.0856914	0.036315	0.220706	0.105754	1.18502	0.0663456	0.0444264	0.539644	0.151739	0.727345	0.0725386	0.0280282	0.106401	0.0478506	0.466472	0.0642559	0.0453753	0.451183	0.109811	0.660978	0.0556564	0.00550782	0	0	0	1	0	0	1	0	0	0	0	0	0	0	0	0	1	0	0	0	0
chr1	108048395	108048793	0.668346	0.112496	0.113777	0.0897819	0.0554641	0.0720506	0.127581	0.0873105	0.0201859	0.198002	0.0399343	0.254294	0.120116	0.0249967	0.130147	0.0545368	0.0999976	0.0761004	0.0146429	0.0841174	0.0326068	0.387877	0.168353	0.0483993	0.0731265	0.0644046	1	0	0	0	0	0	0	0	0	0	0	0	1	0	0	0	0	0.502513	0	0	0
chr1	108523939	108524337	0.75642	0.14937	0.106833	0.165956	0.0579871	0.0388272	0.286806	0.0806554	0.0289895	0.221723	0.0328039	0.765262	0.165389	0.04998	0.203227	0.0461743	0.101418	0.0309867	0.0146839	0.0863457	0.0431259	0.653994	0.381189	0.0567199	0.0378685	0.0121036	1	0	0	0	0	0	0	0	0	0	0	0	0	1	0	0	0	1	0	0	0
chr1	108554839	108555643	0.567221	0.0222754	0.27324	0.101353	0.0668674	0.0339002	0.433995	0.0828709	0.0356894	0.260284	0.0506706	0.867341	0.197939	0.0619299	0.145348	0.0349516	0.302429	0.0218245	0.0285138	0.0645649	0.0309651	0.625319	0.138564	0.0842334	0.0364888	0.016951	1	0	1	0	0	0	0	0	1	0	0	0	0	0	0	0	0	1	0	0	0
chr1	108562887	108563285	1.02025	0	0.129382	0.124372	0.0998738	0.0717739	0.139862	0.142247	0.0476647	0.416136	0.0862919	0.982258	0.239351	0.0976004	0.177127	0.0579666	0.190245	0.0605204	0.0604308	0.0664711	0.0528453	0.89477	0.282954	0.120415	0.0685715	0.0270111	1	0	0	0	0	0	0	0	0	0	0	0	0.213568	0.786432	0	0	0	1	0	0	0
chr1	108608012	108608484	0.177887	0.0100129	0.13901	0.0855713	0.105005	0.0748959	0.540458	0.164749	0.107014	0.173904	0.0194454	0.618883	0.235523	0.0921103	0.167229	0.0546269	0.0942225	0.0442894	0.0218007	0.539544	0.0693586	0.436179	0.540374	0.0582588	0.0571327	0.0117861	0	0	0	0	0	1	0	0	1	0	0	0	0	0	0	0	0	1	0	0	0
chr1	108656019	108656417	0.847199	0.292491	0.0635912	0.0866028	0.0550384	0.0380651	0.365812	3.25084	0.0907844	0.0853106	0.046829	0.369801	2.59388	0.12373	0.0408182	0.0347419	0.675649	2.1633	0.0454189	0.0605664	0.03583	0.192962	1.88608	0.0319367	0.047373	0.0348535	1	0	0	0	0	0	0	0	0	0.454774	0.545226	0	0	0	0	0	0	0	0.454774	0.545226	0
chr1	108828571	108828969	0.605677	0.0224993	0.0516291	0.0431106	0.0538162	0.0637739	0.0844765	0.0622144	0.00850409	0.0443444	0.0555112	0.0423559	0.089011	0.0230552	0.0627187	0.0416648	0.0396822	0.00996906	0.010801	0.0747815	0.0382037	0.344562	0.166887	0.0330763	0.0282824	0.0355891	1	0	0	0	0	0	0	0	0	0	0	0	1	0	0	0	0	0	0	0	0
chr1	109273587	109273985	0.695814	0	0.0417297	0.0390411	0.0509122	0.0897344	0.0693383	0.0515662	0.00915526	0.0454709	0.0855062	0.0258181	0.0311048	0.0124579	0.0569296	0.0831603	0.0676893	0.0213375	0.0211371	0.0271734	0.0234619	0.235034	0.10222	0.0307422	0.0116937	0.024818	1	0	0	0	0	0	0	0	0	0	0	0	1	0	0	0	0	0	0	0	0
chr1	109281191	109281372	0.241866	0.713243	0.0900962	0.101507	0.0579108	0.0356799	0.0935794	0.0856316	0.0314429	0.1037	0.349302	0.171273	0.164792	0.0401122	0.0677045	0.280296	0.265975	0.0329985	0.0278089	0.0695497	0.060051	0.269235	0.0617469	0.0652137	0.101478	0.0544806	0	1	0	0	0	0	0	0	0	0	0	1	0	0	0	0	0	0	0	0	1
chr1	109393209	109394096	0.455476	0.0302866	0.0792773	0.0555777	0.0619487	0.116079	0.103717	0.0928019	0.0101035	0.0774425	0.227734	0.0841091	0.162028	0.0140414	0.0726887	0.179836	0.0613942	0.0185085	0.0149074	0.0557693	0.0867812	0.533241	0.310065	0.0618857	0.0398528	0.0122134	1	0	0	0	0	1	0	0	0	0	0	0.784667	0.215333	0	0	0	0	0	0	0	0.784667
chr1	109480405	109480803	0.652098	0	0.100302	0.0169136	0.0268408	0.0298137	0.057179	0.0939443	0.0166566	0.0786942	0.136008	0.0420386	0.0892878	0.0215722	0.0395819	0.115319	0.0473565	0.0272549	0.0149983	0.0264763	0.0469488	0.336024	0.0865569	0.06029	0.0464348	0.0405305	1	0	0	0	0	0	0	0	0	0	0	0	1	0	0	0	0	0	0	0	0
chr1	115851043	115851688	0.0719304	0.0138833	0.100071	0.0167143	0.0536373	0.0811075	0.0519202	0.0717587	0.0117808	0.0244095	0.138953	0.0542173	0.0895378	0.0208986	0.0481339	0.112779	0.100472	0.0180925	0.0256975	0.0581548	0.0860851	0.194687	0.0595396	0.0268997	0.0336198	0.0857944	0	0	0	0	0	1	0	0	0	0	0	0	1	0	0	0	0	0	0	0	0
chr1	116759969	116760385	0.156434	0	0.0601163	0.0569403	0.0690365	0.0567747	0.0390874	0.0452888	0.0027162	0.00154888	0.11804	0.0136595	0.0691486	0.0191425	0.027205	0.0646137	0.0150632	0.0147273	0.00718122	0.0261677	0.0445588	0.0169249	0.0218242	0.0127947	0.0187459	0.0334649	0	0	0	0	0	1	0	0	0	0	0	0	1	0	0	0	0	0	0	0	0
chr1	120207510	120207908	0.640366	0.112496	0.0562354	0.11547	0.0393867	0.0280797	0.10384	3.55463	0.059568	0.0688398	0.0269895	0.159073	2.79777	0.0540246	0.0382278	0.0196468	0.201852	2.48405	0.0844529	0.0627261	0.0786313	0.0936307	2.19264	0.04796	0.043661	0.0329241	1	0	0	0	0	0	0	0	0	0	1	0	0	0	0	0	0	0	0.271357	0.728643	0
chr1	120285230	120285628	0.598713	0.100622	0.111646	0	0.0374471	0.0338932	0.179501	2.60285	0.0381838	0.0168932	0.0257913	0.0826294	1.57656	0.0399759	0.0220968	0.0456238	0.17461	2.51683	0.0350007	0.0511621	0.0298209	0.0728891	2.07525	0.0370856	0.017255	0.0196129	1	0	0	0	0	0	0	0	0	0	1	0	0	0	0	0	0	0	0	1	0
chr1	120317101	120317766	0.0694582	0.0564814	0.0658732	0.0898107	0.0823336	0.0557712	0.245299	0.0986898	0.797364	0.0377459	0.0292731	0.538376	0.136955	0.711048	0.063	0.0339326	0.487358	0.0471013	0.486962	0.0532072	0.0245845	0.219433	0.0475479	0.384531	0.0530675	0.0166146	0	0	0	0	0	1	0.750376	0.249624	0	0	0	0	0	0	0	0	1	0	0	0	0
chr1	120373238	120374212	0.190218	0	0.642854	0.10211	0.0615921	0.0279628	0.96835	0.252276	0.171993	0.0192708	0.0169041	0.730925	0.167895	0.215888	0.0511285	0.0207971	0.554502	0.0520036	0.166307	0.0478835	0.0228191	0.30271	0.141893	0.132975	0.0343206	0.00939821	0	0	1	0	0	0	0	0.371663	0.422998	0.205339	0	0	0	0	0	0	0.371663	0.628337	0	0	0
chr1	120375576	120376600	0.0913173	0.0262346	0.283393	0.311244	0.0817325	0.0364921	1.60327	0.294886	0.388128	0.0183572	0.0483353	1.76553	0.234113	0.314115	0.0586543	0.0224395	0.981557	0.113278	0.316485	0.0627691	0.0486588	0.295257	0.0762774	0.259855	0.084167	0.02104	0	0	1	1	0	0	0	0.023438	0.390625	0.585938	0	0	0	0	0	0	0.609375	0.390625	0	0	0
chr1	120377438	120378452	0.153055	0.0529866	0.317975	0.229857	0.0910056	0.0245844	0.793405	0.295679	0.0713588	0.0132613	0.0270235	0.879566	0.198738	0.129744	0.0375115	0.0291673	0.815807	0.104	0.119912	0.0434032	0.0196339	0.140332	0.0320529	0.137528	0.0485508	0.017314	0	0	1	1	0	0	0	0	0.554241	0.445759	0	0	0	0	0	0	0	0.751479	0.248521	0	0
chr1	120380009	120380617	0.0969042	0.0294563	0.166914	0.285534	0.0814581	0.0334007	1.36084	0.38334	0.243057	0.0187531	0.0329561	1.47321	0.331086	0.243186	0.0545572	0.0363792	1.07806	0.0863357	0.215522	0.037589	0.0381095	0.288516	0.0572711	0.204305	0.0634812	0.0150103	0	0	0	1	0	0	0	0.027961	0	0.972039	0	0	0	0	0	0	0	0.314145	0.685855	0	0
chr1	120381396	120381903	0.139187	0	0.114357	0.257859	0.0561874	0.0259424	0.625732	0.104672	0.185287	0.0582394	0.0159597	0.881957	0.136608	0.181187	0.0142035	0.0127805	0.352608	0.0383129	0.187684	0.052438	0.0249984	0.239495	0.0550812	0.121063	0.0605113	0.0168346	0	0	0	1	0	0	0	0.203156	0.796844	0	0	0	0	0	0	0	0	1	0	0	0
chr1	120406640	120407149	0.29785	0.087964	0.157342	0.277629	0.100563	0.0370215	0.184757	0.166253	1.43782	0.225877	0.0398268	0.151687	0.211732	1.22733	0.0846405	0.0552581	0.109048	0.0526791	0.876781	0.0902914	0.036349	0.112471	0.071697	0.685575	0.0928712	0.0192213	0	0	0	1	0	0	1	0	0	0	0	0	0	0	0	1	0	0	0	0	0
chr1	121050374	121050772	0.499294	0.0224993	0.201017	0.104025	0.0980689	0.0283226	0.156398	0.159529	0.0498917	0.132471	0.573694	0.118878	0.265296	0.0628427	0.175597	0.227315	0.0979905	0.0531239	0.0553723	0.105632	0.214642	0.0899505	0.140138	0.0481934	0.167437	0.319025	1	0	0	0	0	0	0	0	0	0	0	1	0	0	0	0	0	0	0	0	0
chr1	121398235	121398985	0.15075	0.0477585	0.481889	0.236197	0.0520121	0.0323669	0.898433	0.268393	0.416177	0.0282386	0.0527657	1.02602	0.202322	0.495139	0.0794787	0.060185	0.290943	0.0501088	0.113691	0.0658259	0.0214535	0.470657	0.2737	0.266785	0.0446071	0.0492625	0	0	1	1	0	0	0	1	0	0	0	0	0	0	0	0	1	0	0	0	0
chr1	121399795	121400595	0.14614	0.0254961	0.226895	0.329494	0.0669727	0.0270474	1.07614	1.0547	0.164729	0.0492005	0.0317115	0.983758	0.676377	0.160708	0.0523492	0.0266055	0.523161	0.254809	0.0522522	0.125477	0.0291435	0.490678	1.2695	0.123945	0.0526697	0.0183685	0	0	0	1	0	0	0	0	0	1	0	0	0	0	0	0	0	0.00625	0.99375	0	0
chr1	121422623	121423021	1.21845	0.108122	0.135982	0.0574808	0.0606216	0.0220063	0.614468	3.54186	0.143085	0.0268179	0.0982346	0.373867	3.09015	0.0576649	0.0433497	0.0591733	0.93159	2.12846	0.0574913	0.122772	0.0720346	0.225158	2.1582	0.0605643	0.0349723	0.0290098	1	0	0	0	0	0	0	0	0	0.555276	0.444724	0	0	0	0	0	0	0	0.555276	0.444724	0
chr1	121526754	121527637	0.093228	0	0.347052	0.0959537	0.0381035	0.0248486	0.516864	0.155007	0.0865881	0	0.0144583	0.494105	0.0734919	0.240987	0.0339837	0.0393441	0.277396	0.031574	0.110328	0.0467065	0.0214431	0.0631082	0.0221854	0.0480989	0.0557722	0.00935324	0	0	1	0	0	0	0	0	1	0	0	0	0	0	0	0	0.268403	0.731597	0	0	0
chr1	121582802	121583169	0.22165	0	0.0568103	0.359122	0.0604413	0.0267904	0.226607	0.100646	0.282845	0.0970204	0.0404104	0.531614	0.156516	0.253346	0.033157	0.0113649	0.379414	0.0573367	0.173773	0.0607165	0.0409429	0.226589	0.0463625	0.208134	0.0298751	0.0142098	0	0	0	1	0	0	1	0	0	0	0	0	0	0	0	0	1	0	0	0	0
chr1	121724568	121725006	0.0993631	0	0.0696529	0.0818138	0.0987605	0.0650671	0.152363	0.069037	0.154396	0.00550056	0.0232575	0.248134	0.0872164	0.178257	0.0412275	0.0402837	0.0793752	0.0225739	0.0895244	0.0305791	0.0167671	0.137342	0.046971	0.0431309	0.0609377	0.0142398	0	0	0	0	0	1	1	0	0	0	0	0	0	0	0	0	0	1	0	0	0
chr1	121809454	121809852	0.498004	0.0674979	0.0479856	0.0522666	0.0352384	0.0262367	0.14196	1.72077	0.0260853	0.000633495	0.010509	0.0880434	0.979222	0.0359042	0.0112053	0.0114536	0.247078	2.01593	0.0170082	0.0432343	0.0271474	0.124997	1.58617	0.0384998	0.0221364	0.0272609	1	0	0	0	0	0	0	0	0	0.130653	0.869347	0	0	0	0	0	0	0	0	1	0
chr1	121813643	121814512	0.104003	0	0.323552	0.143861	0.0632061	0.0234265	0.666614	0.116474	0.0264469	0.056577	0.0389637	0.79916	0.135475	0.0406809	0.0614766	0.0253559	0.279464	0.0384125	0.0238262	0.0606181	0.0159981	0.256567	0.0617416	0.0277509	0.0833742	0.0381874	0	0	1	0	0	0	0	0	1	0	0	0	0	0	0	0	0	1	0	0	0
chr1	122017684	122018082	0.570732	0.0224993	0.0706034	0.0507406	0.0334445	0.0249634	0.207437	2.24174	0.02701	0.0393469	0.0154394	0.106108	1.61325	0.031374	0.0175636	0.0287081	0.20162	2.10987	0.0413446	0.0408969	0.0357425	0.0668944	1.78096	0.0300556	0.018166	0.0272054	1	0	0	0	0	0	0	0	0	0.20603	0.79397	0	0	0	0	0	0	0	0	1	0
chr1	122132351	122132754	0.10863	0	0.0522108	0.0904262	0.054909	0.0616757	0.205494	0.0586226	0.543335	0.0478264	0.0490803	0.133207	0.0690181	0.497434	0.0404474	0.0206158	0.107442	0.0437513	0.805671	0.0491774	0.0210363	0.178026	0.037208	0.074444	0.0266826	0.0167239	0	0	0	0	0	1	0	1	0	0	0	0	0	0	0	1	0	0	0	0	0
chr1	122155210	122156449	0.656953	0.224049	0.822542	0.307235	0.107055	0.0371722	0.833389	0.928438	0.108019	0.059918	0.082003	0.900156	0.752279	0.154612	0.0438681	0.0273458	1.31459	1.198	0.839506	0.0619759	0.0362824	0.597423	0.634021	0.0580604	0.0995645	0.0391654	1	1	1	1	0	0	0	0	0.039548	0.960452	0	0	0	0	0	0	0.039548	0	0.960452	0	0
chr1	122161243	122161641	0.448359	0.112496	0.134951	0.0591338	0.0341845	0.0282556	0.387212	3.09932	0.130856	0.0492013	0.202775	0.454414	1.46522	0.283876	0.053515	0.062836	0.690507	2.51097	1.10489	0.0739067	0.0614408	0.364781	1.68828	0.0343807	0.162012	0.0420018	1	0	0	0	0	0	0	0	0	1	0	0	0	0	0	0	0	0	1	0	0
chr1	122164298	122164601	0.117041	0.0591071	0.279664	0.333081	0.15394	0.0381157	0.767075	0.215693	0.104502	0.028939	0.111179	1.39809	0.270959	0.195729	0.0640814	0.033621	0.940524	1.80438	0.990895	0.049536	0.04347	0.419987	0.0818222	0.0487852	0.152207	0.0280958	0	0	0	1	0	0	0	0	1	0	0	0	0	0	0	0	0	0.663366	0.336634	0	0
chr1	122339932	122340482	0.107123	0	0.0634785	0.0627608	0.0901296	0.069342	0.111658	0.0873848	0.014758	0.0393223	0.278205	0.408283	0.149347	0.0289476	0.121629	0.0449801	0.0738442	0.041162	0.0113975	0.0569237	0.029761	0.392671	0.0723836	0.0249288	0.0653834	0.016111	0	0	0	0	0	1	0	0	0	0	0	1	0	0	0	0	0	1	0	0	0
chr1	122365112	122365556	0.113972	0.0179274	0.175816	0.107155	0.0864612	0.0721623	0.0690757	0.102416	0.0219352	0.0733173	0.285196	0.0602044	0.116356	0.0273138	0.0718241	0.0675418	0.0600273	0.044024	0.0130278	0.0755861	0.0369893	0.136997	0.0374969	0.0120124	0.122166	0.0195219	0	0	0	0	0	1	0	0	0	0	0	1	0	0	0	0	0	0	0	0	0
chr1	122476759	122477232	0.17252	0	0.0807537	0.059067	0.0931698	0.065814	0.0821059	0.0867432	0.0102021	0.0294951	0.240306	0.0764689	0.119895	0.0310053	0.0527904	0.162252	0.0515099	0.0355046	0.0146794	0.0950358	0.0495646	0.0379791	0.0430366	0.0345556	0.106358	0.0582218	0	0	0	0	0	1	0	0	0	0	0	1	0	0	0	0	0	0	0	0	0
chr1	123374792	123375190	2.74947	0	0.120858	0.0634578	0.0625725	0.0393887	0.108278	0.130869	1.16441	0.12325	0.0375575	0.207973	0.168208	1.05285	0.0896236	0.0348053	0.0711029	0.032586	0.353945	0.054716	0.036742	0.55627	0.105988	0.428413	0.0430083	0.0119787	1	0	0	0	0	0	1	0	0	0	0	0	0	0	0	1	0	0	0	0	0
chr1	123398559	123398595	0.102644	1.3819	0.109446	0.133564	0.091848	0.0539004	0.100148	0.156882	1.19185	0.0280145	0.0668867	0.168147	0.147457	1.06636	0.063785	0.0215334	0.0822769	0.0688095	0.315759	0.145222	0.04475	0.108588	0.0743315	0.649235	0.084784	0.0386705	0	1	0	0	0	0	1	0	0	0	0	0	0	0	0	1	0	0	0	0	0
chr1	123437013	123437411	1.49956	0.0224993	0.0790595	0.11369	0.0520558	0.0318744	0.146307	0.105623	0.0321411	0.356938	0.0502665	0.370812	0.218136	0.0312931	0.413186	0.0451792	0.0731785	0.0437812	0.0187445	0.115747	0.0357301	0.213864	0.0672584	0.0296849	0.158993	0.0946914	1	0	0	0	0	0	0	0	0	0	0	0	0	1	0	0	0	0	0	0	0
chr1	123464175	123464573	0.508578	0.134996	0.086759	0.0507406	0.0465173	0.0247289	0.172905	3.38712	0.0626282	0.0784123	0.063997	0.103649	2.62259	0.0583931	0.0227444	0.0488418	0.282241	2.39284	0.0636576	0.0931796	0.0378789	0.090767	2.08279	0.0509807	0.0384668	0.0354503	1	0	0	0	0	0	0	0	0	0	1	0	0	0	0	0	0	0	0	1	0
chr1	123598908	123599825	0.12755	0.0195305	0.0898719	0.0503928	0.0832015	0.059871	0.106182	0.126906	0.0192293	0.0733204	0.414103	0.0786376	0.161544	0.0380541	0.0803526	0.337771	0.0612469	0.0480518	0.0305722	0.10856	0.206876	0.0660827	0.0894527	0.0345579	0.0701755	0.221294	0	0	0	0	0	1	0	0	0	0	0	1	0	0	0	0	0	0	0	0	1
chr1	125217690	125218056	0.175	0	0.0693007	0.263163	0.0359663	0.0246045	0.0502451	0.0538569	0.00920517	0.0267898	0.12278	0.045477	0.0850534	0.0274901	0.0347627	0.112441	0.0178339	0.0301451	0.00356821	0.0528409	0.0798271	0.0193535	0.0526545	0.0140797	0.0329288	0.10297	0	0	0	1	0	0	0	0	0	0	0	0	1	0	0	0	0	0	0	0	0
chr1	127286121	127287394	0.238267	0.0914466	0.171347	0.120153	0.0662222	0.109023	0.54294	0.191666	0.705647	0.128387	0.0700174	0.555867	0.250335	0.509697	0.0772267	0.0612134	0.185595	0.0402058	0.239837	0.0586281	0.0461874	0.560323	0.220459	0.190507	0.0490414	0.112475	0	0	0	0	0	1	0.062058	0.937942	0	0	0	0	0	0	0	0.214454	0.785546	0	0	0	0
chr1	127327696	127328436	0.101673	0	0.255829	0.0614201	0.0352217	0.0220993	0.577424	0.228687	0.193922	0.0127958	0.00605361	0.429899	0.097669	0.231981	0.0309883	0.00769737	0.395264	0.0687278	0.130207	0.0236206	0.0175909	0.295837	0.159435	0.182667	0.0168276	0.00433737	0	0	1	0	0	0	0	0.189189	0.27027	0.540541	0	0	0	0	0	0	0.589189	0.410811	0	0	0
chr1	127331254	127331652	0.559898	0.134996	0.0711534	0.0170407	0.035272	0.0240085	0.164029	2.90653	0.0857313	0.0168932	0.0355539	0.11402	1.75437	0.0550629	0.0153853	0.0244951	0.205198	2.37132	0.0434364	0.0529937	0.0362422	0.0509703	1.88527	0.0391863	0.0234418	0.0169895	1	0	0	0	0	0	0	0	0	0	1	0	0	0	0	0	0	0	0	1	0
chr1	127331856	127332254	0.791879	0	0.0757594	0.0169136	0.0283992	0.0269907	0.123083	3.21289	0.0355271	0.0168932	0.0563951	0.155603	3.00959	0.0737095	0.0269439	0.0259135	0.141933	2.41376	0.0413172	0.0555772	0.0735715	0.0369331	1.84554	0.0207877	0.0223132	0.025165	1	0	0	0	0	0	0	0	0	0	1	0	0	0	0	0	0	0	0	1	0
chr1	127332404	127332802	0.839208	0.0506235	0.0990648	0.124753	0.0487038	0.0329467	0.243641	1.64666	0.0532388	0.0369539	0.0154983	0.234306	0.926047	0.0220845	0.0503163	0.0251937	0.550295	2.1255	0.027481	0.062138	0.0241615	0.138914	1.57548	0.0391589	0.00977645	0.0140191	1	0	0	0	0	0	0	0	0	0.507538	0.492462	0	0	0	0	0	0	0	0.507538	0.492462	0
chr1	127344271	127345167	0.110377	0	0.464747	0.162404	0.0433477	0.0192675	0.462942	0.0656745	0.0402046	0.0281395	0.0413582	0.295067	0.0551324	0.0433718	0.0498872	0.0518263	0.0859682	0.022443	0.0153043	0.0386215	0.0334626	0.21833	0.0331101	0.0996935	0.0267567	0.0570252	0	0	1	0	0	0	0	0	1	0	0	0	0	0	0	0	0	1	0	0	0
chr1	127362780	127363725	0.488401	0.0379036	0.335142	0.0716622	0.0660602	0.0276426	0.96967	0.25867	0.038449	0.0208997	0.036343	0.869945	0.189264	0.0684304	0.0468377	0.0177885	0.165586	0.0351156	0.0284687	0.0714587	0.0301701	0.324257	0.121691	0.0702772	0.0452123	0.0245177	1	0	1	0	0	0	0	0	0.656085	0.343915	0	0	0	0	0	0	0	1	0	0	0
chr1	127456797	127457195	0.485883	0.0674979	0.0567164	0.0169136	0.0413936	0.0264294	0.243003	2.94438	0.0322192	0.0181602	0.0328628	0.177791	1.85695	0.0457195	0.0322032	0.040077	0.575404	2.18832	0.0569308	0.0426328	0.0372417	0.075445	1.88444	0.0144717	0.0204503	0.0206678	1	0	0	0	0	0	0	0	0	0.51005	0.48995	0	0	0	0	0	0	0	0	1	0
chr1	127559700	127560098	3.2155	0.0224993	0.134676	0.163541	0.0700285	0.0628527	0.156247	0.121745	0.0263198	0.158162	0.151585	0.492586	0.181167	0.0144938	0.113958	0.0865901	0.114882	0.0197515	0.0139183	0.0655142	0.0520333	0.400737	0.13167	0.0439507	0.125082	0.0948858	1	0	0	0	0	0	0	0	0	0	0	0	1	0	0	0	0	0.753769	0	0	0
chr1	127658722	127659368	0.143082	0.0554471	0.0916988	0.0227996	0.0600125	0.0617571	0.0271372	0.0599951	0.00923508	0.0568529	0.108338	0.0272683	0.0713675	0.0146778	0.0719984	0.0475958	0.0515044	0.0221043	0.0227685	0.0405907	0.0440419	0.0631189	0.0475581	0.021258	0.0730335	0.0558767	0	0	0	0	0	1	0	0	0	0	0	0	1	0	0	0	0	0	0	0	0
chr1	127760939	127761355	0.111773	0	0.0724815	0.0361351	0.0927744	0.0649658	0.032311	0.0597688	0.0126216	0.117647	0.0934015	0.0534808	0.0706654	0.0147954	0.0625208	0.121976	0.0603186	0.021141	0.0301769	0.0565853	0.0913288	0.0311614	0.0304936	0.0236583	0.056381	0.0907006	0	0	0	0	0	1	0	0	0	0	0	0.146635	0.853365	0	0	0	0	0	0	0	0
chr1	127839664	127840607	0.112223	0	0.543253	0.0969331	0.0340324	0.0279133	0.429861	0.117509	0.0253114	0.0626242	0.183999	0.139556	0.123218	0.0232568	0.071329	0.148775	0.0665659	0.0216057	0.034011	0.0651954	0.0369463	0.0492882	0.0432196	0.0409647	0.0682122	0.0960819	0	0	1	0	0	0	0	0	1	0	0	0	0	0	0	0	0	0	0	0	0
chr1	127844344	127845095	0.149729	0.0238475	0.23831	0.0268906	0.0499108	0.0304681	0.398219	0.122032	0.0298846	0.0486057	0.208669	0.0994034	0.12702	0.0148978	0.117635	0.118762	0.0502592	0.0182934	0.0248817	0.0442819	0.0599183	0.0561734	0.0668268	0.0283056	0.0864221	0.12119	0	0	1	0	0	0	0	0	1	0	0	0	0	0	0	0	0	0	0	0	0
chr1	127901918	127902863	0.116982	0.0284278	0.494186	0.035617	0.0443015	0.0264395	0.378791	0.13443	0.0298871	0.0274512	0.160851	0.136747	0.10406	0.0248032	0.101725	0.1469	0.0705029	0.0118998	0.0207929	0.0432334	0.0490593	0.0386731	0.0343525	0.0369342	0.0615049	0.111434	0	0	1	0	0	0	0	0	1	0	0	0	0	0	0	0	0	0	0	0	0
chr1	128214011	128215321	0.0998234	0.225577	1.04679	0.618179	0.0663413	0.0610436	0.22855	0.209471	0.0223551	0.033981	0.184294	0.259531	0.176716	0.0215053	0.0500223	0.147476	0.402158	0.106938	0.0254879	0.0541815	0.0280798	0.255279	0.186051	0.0484228	0.0308427	0.102353	0	1	1	1	0	1	0	0	0.092366	0.305344	0.60229	0	0	0	0	0	0	0.694656	0.305344	0	0
chr1	128493717	128494436	0.0470393	0.00380551	0.281872	0.0256236	0.0559799	0.0263848	0.178279	0.0783245	0.0239985	0.105707	0.24055	0.222298	0.123716	0.0272707	0.0928555	0.157295	0.113027	0.0137221	0.0494883	0.0558694	0.0267905	0.0648364	0.0320203	0.0275133	0.0955295	0.0765726	0	0	1	0	0	0	0	0	0	0	0	1	0	0	0	0	0	0.671766	0	0	0
chr1	128513837	128514749	0.0994929	0.0392752	0.336797	0.0604923	0.0634355	0.0316734	0.161048	0.129644	0.0175899	0.0541859	0.206926	0.309958	0.107408	0.0323495	0.0502281	0.191842	0.563404	0.0813279	0.036778	0.0656399	0.0427764	0.110722	0.0521642	0.0332973	0.0678544	0.110105	0	0	1	0	0	0	0	0	0	0	0	1	0	0	0	0	0	1	0	0	0
chr1	128522778	128523605	0.196972	0.0108279	0.0926715	0.153799	0.0978997	0.0578559	0.25477	0.139673	0.0482032	0.134788	0.409859	0.338151	0.131649	0.052402	0.0723713	0.238815	0.123357	0.0453791	0.0458482	0.115526	0.049109	0.116042	0.0919348	0.0343078	0.124038	0.115056	0	0	0	0	0	1	0	0	0	0	0	1	0	0	0	0	0	0	0	0	0.73156
chr1	128546199	128546974	0.118074	0	0.273757	0.0762797	0.0675961	0.0322907	0.214369	0.0947363	0.042723	0.0490164	0.231744	0.21041	0.0862534	0.0203842	0.0560635	0.213436	0.607273	0.0488893	0.0603274	0.0500495	0.0257594	0.0523583	0.0560228	0.024383	0.0719165	0.0607392	0	0	1	0	0	0	0	0	0	0	0	1	0	0	0	0	0	0.482581	0	0	0.517419
chr1	128547099	128548015	0.0891413	0.146639	0.437216	0.185712	0.160812	0.0173326	0.127364	0.0949944	0.0138011	0.0358745	0.191291	0.278518	0.123723	0.0209253	0.0384808	0.112529	0.60461	0.116378	0.0277541	0.0412169	0.0123872	0.044729	0.0319555	0.0135125	0.0565158	0.06739	0	1	1	1	1	0	0	0	0	0	0	1	0	0	0	0	0	1	0	0	0
chr1	128590562	128591298	0.0666627	0.0121667	0.132644	0.0736508	0.0922586	0.0644113	0.119061	0.144649	0.0199089	0.115941	0.376397	0.0884435	0.177103	0.0555711	0.0884825	0.225227	0.0774605	0.0380244	0.0354956	0.0751569	0.0661385	0.0592789	0.0915365	0.0438658	0.091389	0.149405	0	0	0	0	0	1	0	0	0	0	0	1	0	0	0	0	0	0	0	0	0.543478
chr1	128982277	128983241	0.158225	0	0.105472	0.0844786	0.0550607	0.115311	0.0804976	0.0686821	0.0168885	0.0800332	0.282354	0.0349171	0.103307	0.0189928	0.0780473	0.174361	0.0759573	0.0377525	0.0198243	0.0649773	0.0417017	0.4921	0.132416	0.055321	0.0493792	0.0418625	0	0	0	0	0	1	0	0	0	0	0	1	0	0	0	0	0	0	0	0	0.457469
chr1	129014517	129015211	0.116547	0.025806	0.16271	0.0888288	0.0666702	0.115044	0.102732	0.109106	0.0212183	0.0320108	0.297205	0.0447488	0.167688	0.0320728	0.0765397	0.202651	0.0729861	0.0374517	0.00955008	0.0945837	0.0393909	0.447548	0.14006	0.0486308	0.0583357	0.0339103	0	0	0	0	0	1	0	0	0	0	0	1	0	0	0	0	0	0	0	0	0.592219
chr1	129102492	129102890	0.630953	0.0449987	0.112952	0.0709607	0.0539844	0.0250639	0.13202	0.243576	0.0835176	0.19582	0.892815	0.0678964	0.197324	0.0644332	0.0828926	0.809478	0.627078	1.0408	0.0263462	0.677643	0.059067	0.231768	2.21847	0.0492918	0.046394	0.0271221	1	0	0	0	0	0	0	0	0	0	0	1	0	0	0	0	0	0	0	0	1
chr1	129127252	129127650	0.482272	0	0.161006	0.0301392	0.056776	0.0387772	0.0590637	0.111076	0.0169692	0.115577	0.380211	0.0643469	0.159777	0.0218418	0.11121	0.283778	0.10195	0.034865	0.0452548	0.0542239	0.033169	0.548297	0.488957	0.120483	0.0476178	0.0234855	1	0	0	0	0	0	0	0	0	0	0	1	0	0	0	0	0	0	0	0	1
chr1	129205709	129206107	0.922765	0	0.057129	0.129077	0.0380413	0.0306011	0.0397	0.0769199	0.0119161	0.0237912	0.259347	0.0472935	0.16783	0.0347851	0.062758	0.204725	0.10916	0.0220039	0.0790522	0.0398034	0.0318072	0.388748	0.108823	0.161345	0.0426412	0.0333266	1	0	0	0	0	0	0	0	0	0	0	1	0	0	0	0	0	0	0	0	1
chr1	129559019	129559718	0.215641	0.068324	0.147767	0.107092	0.0745943	0.152784	0.124689	0.119229	0.0463745	0.213976	0.0664803	0.49768	0.188741	0.0375242	0.201696	0.0355608	0.227958	0.0529072	0.0266782	0.119411	0.0370605	0.624877	0.282344	0.167794	0.0651578	0.0471191	0	0	0	0	0	1	0	0	0	0	0	0	1	0	0	0	0	1	0	0	0
chr1	129652767	129653889	0.153829	0.351164	0.825598	0.458048	0.250515	0.0302411	0.820572	0.181356	0.0547238	0.0302868	0.0289862	0.736412	0.154122	0.0777797	0.0297797	0.0208626	0.974171	0.674155	0.113559	0.0536307	0.0178858	0.430122	0.0741574	0.0666864	0.049077	0.0260512	0	1	1	1	1	0	0	0	1	0	0	0	0	0	0	0	0	1	0	0	0
chr1	129670664	129671062	0.618313	0.15062	0.057954	0.0169136	0.0549822	0.0266556	0.0701286	2.93891	0.0506209	0.0509612	0.0339235	0.0551063	2.46674	0.0758935	0.0265122	0.02314	0.0618447	2.43079	0.086777	0.05257	0.0601913	0.0534056	1.74554	0.0469988	0.0245568	0.025165	1	0	0	0	0	0	0	0	0	0	1	0	0	0	0	0	0	0	0	1	0
chr1	129726877	129727275	0.863191	0.0762477	0.143613	0.163541	0.109348	0.0777972	0.338271	0.173226	0.102857	1.01401	0.0733667	0.510829	0.256388	0.0777405	0.474394	0.0851712	0.196841	0.0514978	0.0474424	0.186947	0.0711978	0.774268	0.231044	0.14664	0.0866694	0.0512461	1	0	0	0	0	0	0	0	0	0	0	0	0	0.811558	0.188442	0	0	0	0	0	0
chr1	129746719	129747117	0.451324	0.0224993	0.19428	0.0892732	0.0635814	0.0386599	0.16722	0.0862374	0.0321932	0.313438	0.0694773	0.148702	0.116643	0.0682088	0.295952	0.189694	0.0991101	0.0415288	0.0446533	0.0964878	0.0598914	0.499252	0.185797	0.10343	0.0370255	0.0513154	1	0	0	0	0	0	0	0	0	0	0	0	0	1	0	0	0	0	0	0	0
chr1	129765231	129765629	0.569315	0.184994	0.0533479	0.0761749	0.0433333	0.0339435	0.247866	2.95636	0.0741277	0.0189344	0.0421539	0.207595	2.23592	0.094311	0.0524357	0.0758774	0.266578	2.15772	0.094967	0.0667856	0.0793557	0.140653	1.89437	0.057585	0.0460269	0.0435286	1	0	0	0	0	0	0	0	0	0.072864	0.927136	0	0	0	0	0	0	0	0	1	0
chr1	129886339	129887116	0.128338	0.0345742	0.116841	0.0730217	0.0857878	0.0777942	0.191037	0.138347	0.525925	0.0588414	0.0307283	0.779912	0.242535	0.459584	0.063991	0.0311343	0.172899	0.0431314	0.366297	0.0738937	0.0542912	0.650537	0.444781	0.129162	0.0552597	0.00961962	0	0	0	0	0	1	1	0	0	0	0	0	0	0	0	0	1	0	0	0	0
chr1	129902202	129903264	0.0903694	0.0927513	0.221777	0.109567	0.107754	0.0397164	0.190271	0.164626	0.416994	0.0383023	0.0295196	0.178309	0.179504	0.415346	0.084892	0.0222713	0.159482	0.216251	0.519055	0.0591503	0.0595076	0.53724	0.168149	0.337265	0.0554475	0.048372	0	0	1	1	1	0	0.623352	0.376648	0	0	0	0	0	0	0	0.811676	0.188324	0	0	0	0
chr1	129965394	129966293	0.159789	0	0.124511	0.403276	0.0469952	0.0739904	0.581211	0.0982737	0.145378	0.0147707	0.0477163	0.705905	0.131956	0.154047	0.0331703	0.0876257	0.45075	0.0433319	0.147635	0.0375789	0.0340921	0.402638	0.198732	0.12046	0.0155188	0.040428	0	0	0	1	0	1	0	0	1	0	0	0	0	0	0	0	0.103448	0.896552	0	0	0
chr1	130000399	130000488	0.26007	1.00056	0.438089	0.24795	0.195286	0.0734612	0.28547	3.75266	0.0965591	0.0276997	0.0418127	0.245455	2.93242	0.128424	0.0363316	0.0425092	0.277907	2.54592	0.0780156	0.0649762	0.0626277	0.110946	2.25104	0.0619534	0.0356931	0.00595885	0	1	0	0	0	0	0	0	0	0	1	0	0	0	0	0	0	0	0	1	0
chr1	130158789	130159163	0.107447	0	0.0172655	0.0347799	0.111151	0.0752566	0.0671239	0.0488668	0.417526	0.0396248	0.0109743	0.089198	0.00923931	0.570312	0.0656157	0.0194432	0.0524589	0.0130766	0.331641	0.0458632	0.0182271	0.0581717	0.0294962	0.337494	0.0332228	0.0129394	0	0	0	0	0	1	1	0	0	0	0	0	0	0	0	1	0	0	0	0	0
chr1	130223494	130224536	0.278281	0.0343752	0.659353	0.164081	0.074912	0.0353848	0.841402	0.159234	0.573693	0.0338216	0.060255	0.627548	0.147749	0.621403	0.0556247	0.0848754	0.377885	0.0436263	0.694767	0.0677566	0.0572472	0.326799	0.0658997	0.325945	0.0716199	0.0377586	1	0	1	0	0	0	0	1	0	0	0	0	0	0	0	0.101727	0.898273	0	0	0	0
chr1	130249653	130250275	0.199512	0.0287934	0.473194	0.12214	0.0407056	0.0302422	1.01407	0.134717	0.903397	0.0314824	0.0253014	0.666088	0.0948939	1.07127	0.0660745	0.0391367	0.231268	0.06048	1.45312	0.0617311	0.0308566	0.202759	0.0566255	0.725281	0.0507154	0.0159692	0	0	1	0	0	0	0	1	0	0	0	0	0	0	0	0	1	0	0	0	0
chr1	130255985	130256383	0.694526	0.115621	0.0118933	0.0474343	0.0530536	0.0264294	0.162539	2.99947	0.0825929	0.0570849	0.0313896	0.126334	2.0693	0.0663344	0.0212137	0.0360121	0.24686	2.3989	0.0936404	0.0517089	0.0421764	0.19054	2.07193	0.0498548	0.0339253	0.0248735	1	0	0	0	0	0	0	0	0	0	1	0	0	0	0	0	0	0	0	1	0
chr1	130312947	130314069	0.794758	0.215488	0.176362	0.209988	0.0487109	0.0270111	0.21774	2.66207	0.0607617	0.0366536	0.0354315	0.165672	1.89368	0.0748144	0.0268144	0.0311887	0.302019	2.1683	0.0846831	0.073743	0.0620907	0.120249	1.83033	0.0476478	0.0248592	0.0183013	1	1	1	1	0	0	0	0	0	0.061497	0.938503	0	0	0	0	0	0	0	0	1	0
chr1	130367641	130368122	0.0830113	0	0.0916408	0.133111	0.0989118	0.0682958	0.143597	0.0998843	0.0355174	0.259236	0.0784552	0.234943	0.18466	0.0393587	0.221289	0.0864856	0.0727089	0.038818	0.0296399	0.210617	0.0645047	0.196636	0.0598526	0.0578391	0.110665	0.0651438	0	0	0	0	0	1	0	0	0	0	0	0	1	0	0	0	0	0	0	0	0
chr1	130487845	130488243	0.55397	0.131871	0.0823593	0.104152	0.0563164	0.0254828	0.10916	0.233679	0.0734114	0.39164	0.619855	0.0792783	0.204119	0.0800195	0.10389	0.55623	0.21264	0.21588	0.0496983	1.67283	0.151978	0.19901	2.07846	0.0982814	0.0995867	0.0308281	1	0	0	0	0	0	0	0	0	0	0	1	0	0	0	0	0	0	0	0	1
chr1	130511029	130511427	1.38582	0.0724977	0.1663	0.0859666	0.0806683	0.0425717	0.311095	0.145274	0.0954856	0.186388	0.386359	0.681165	0.213178	0.0590537	0.192101	0.0503026	0.139366	0.0350916	0.0264829	0.143877	0.05352	0.879544	0.285631	0.0745555	0.194441	0.0680275	1	0	0	0	0	0	0	0	0	0	0	1	0	0	0	0	0	1	0	0	0
chr1	130519562	130519960	1.25932	0.0224993	0.0833905	0.0557002	0.0494771	0.0250388	0.049853	0.0632662	0.0397075	0.064546	0.178103	0.0507835	0.106199	0.0285831	0.125967	0.00592792	0.0369375	0.0273215	0.0150394	0.0669357	0.0314449	0.378109	0.12525	0.0149935	0.0751386	0.00731491	1	0	0	0	0	0	0	0	0	0	0	0	1	0	0	0	0	0	0	0	0
chr1	130555394	130555792	0.742363	0	0.153857	0.0347174	0.044589	0.0286912	0.0995236	0.0689124	0.0376759	0.0658834	0.107507	0.386676	0.0822163	0.0266416	0.127282	0.0621373	0.0554404	0.0186986	0.0277818	0.055741	0.0503721	0.262439	0.070348	0.057173	0.0641793	0.0286073	1	0	0	0	0	0	0	0	0	0	0	0	1	0	0	0	0	0.984925	0	0	0
chr1	130572096	130572494	0.606965	0.0674979	0.153375	0.039677	0.0731003	0.0426054	0.174972	0.115927	0.0734508	0.184558	0.311597	0.141662	0.203968	0.0529058	0.18219	0.0446923	0.0812078	0.0433547	0.027481	0.0782534	0.0498222	0.202182	0.0888707	0.0515161	0.158341	0.0737878	1	0	0	0	0	0	0	0	0	0	0	0.763819	0.236181	0	0	0	0	0	0	0	0
chr1	130650283	130650681	0.652873	0.0224993	0.175168	0.0541742	0.0733694	0.0319917	0.260816	0.132135	0.113627	0.133315	0.379739	0.466233	0.275565	0.0583395	0.183289	0.0380022	0.0559594	0.0206311	0.0382137	0.0929887	0.0656756	0.144159	0.0762958	0.0693105	0.1978	0.0559932	1	0	0	0	0	0	0	0	0	0	0	1	0	0	0	0	0	0.796482	0	0	0
chr1	130729703	130730101	1.44411	0.0674979	0.128557	0.0943599	0.0544106	0.0391623	0.280666	0.182027	0.0612868	0.327445	0.305429	0.611425	0.318875	0.0454229	0.363517	0.0586017	0.111249	0.041782	0.0310905	0.128377	0.0481481	0.506398	0.176772	0.0464771	0.216225	0.0235549	1	0	0	0	0	0	0	0	0	0	0	1	0	0	0	0	0	0.243719	0	0	0
chr1	131301531	131301997	0	0	0.0283007	0.0657106	0.0698451	0.0635328	0.0308174	0.0594065	0.00696287	0.0619205	0.0328319	0.0434916	0.0624599	0.0115382	0.172365	0.0329812	0.0220541	0.0199882	0.00972698	0.0293255	0.0517922	0.0157147	0.0254215	0.0159367	0.0397983	0.0386824	0	0	0	0	0	1	0	0	0	0	0	0	1	0	0	0	0	0	0	0	0
chr1	131673450	131674257	0.0763154	0.0332889	0.232114	0.115025	0.0701133	0.0314152	0.622809	0.12395	0.0260895	0.153368	0.0366483	0.628703	0.124139	0.0588739	0.149346	0.0738825	0.0748752	0.0338837	0.0213682	0.0931704	0.0572268	0.291609	0.104179	0.051464	0.0679583	0.0686473	0	0	1	0	0	0	0	0	0.929368	0	0	0	0.070632	0	0	0	0	0.929368	0	0	0
chr1	131753922	131754608	0.050948	0	0.286775	0.153095	0.04647	0.0218802	0.32493	0.0836741	0.018927	0.10777	0.0520815	0.323073	0.105737	0.0279646	0.0870641	0.0509989	0.0776953	0.0183875	0.0113272	0.0444253	0.060232	0.2076	0.0558126	0.0208709	0.0399096	0.0546557	0	0	1	0	0	0	0	0	0	0	0	0	1	0	0	0	0	0.886297	0	0	0
chr1	131852902	131854007	0.0557342	0.153973	1.38758	0.545801	0.163759	0.0300094	0.808518	0.426727	0.0363012	0.0121692	0.0370237	0.724236	0.297913	0.0587693	0.0519939	0.0185146	0.625839	0.278353	0.0426901	0.0548346	0.0300358	0.0740944	0.0395013	0.0179617	0.079849	0.0420901	0	1	1	1	1	0	0	0	0.276018	0.723982	0	0	0	0	0	0	0	0.457014	0.542986	0	0
chr1	131887156	131887959	0.0464647	0.00309766	1.09967	0.220544	0.0538251	0.0262488	0.613662	0.141507	0.0191773	0.0125245	0.0114007	0.478178	0.103677	0.0732475	0.0301133	0.0247746	0.362047	0.0388614	0.0377721	0.0489818	0.0367127	0.0306817	0.0247199	0.0151078	0.0516642	0.0434312	0	0	1	1	0	0	0	0	1	0	0	0	0	0	0	0	0	1	0	0	0
chr1	131889040	131889752	0.0340946	0	0.332488	0.0962513	0.0603534	0.0291822	0.632298	0.110956	0.0689543	0.0221126	0.0464244	0.416832	0.123554	0.0629607	0.0362218	0.0494916	0.331286	0.0250915	0.0475827	0.047334	0.0394356	0.044619	0.0231256	0.0152734	0.0635954	0.0538082	0	0	1	0	0	0	0	0	1	0	0	0	0	0	0	0	0	1	0	0	0
chr1	131958217	131959418	0.0835425	0.0149121	1.72787	0.110077	0.0622637	0.0315193	0.903266	0.149663	0.0271245	0.0375548	0.0444209	0.381374	0.123218	0.0656035	0.0523447	0.114058	0.299181	0.0279838	0.0245752	0.0523859	0.0407466	0.0436046	0.0281662	0.0265635	0.0519544	0.0491994	0	0	1	0	0	0	0	0	1	0	0	0	0	0	0	0	0	1	0	0	0
chr1	132009189	132010199	0.148326	0	0.707794	0.153294	0.0972375	0.0263323	0.644106	0.129137	0.0237401	0.0576102	0.0336093	0.649931	0.101815	0.0500214	0.0564669	0.0513242	0.486431	0.0684684	0.0345132	0.0566261	0.0419439	0.096456	0.0228328	0.0230327	0.0620796	0.0503537	0	0	1	0	0	0	0	0	1	0	0	0	0	0	0	0	0	1	0	0	0
chr1	132173115	132174160	0.278563	0.00856912	0.630569	0.0737652	0.0467663	0.0203424	1.12924	0.144999	0.0608892	0.0253605	0.0609499	0.923138	0.170376	0.113191	0.0717361	0.126287	0.358712	0.0198166	0.0173192	0.0309959	0.024766	0.0852595	0.0275125	0.0344614	0.0678977	0.0502426	0	0	1	0	0	0	0	0	1	0	0	0	0	0	0	0	0	1	0	0	0
chr1	132175556	132176382	0.128616	0.0108411	0.458917	0.113788	0.0511594	0.0257762	0.317973	0.1007	0.098481	0.0574536	0.371314	0.136431	0.0728157	0.173768	0.0669652	0.279153	0.0938323	0.0216285	0.0824793	0.058485	0.115053	0.0490288	0.0223505	0.0822678	0.0445518	0.155083	0	0	1	0	0	0	0	0	0	0	0	0.779661	0.220339	0	0	0	0	0	0	0	0.484262
chr1	132178360	132179458	0.139663	0.00815549	1.18823	0.0911783	0.0604886	0.0257492	0.803138	0.205809	0.0276627	0.00612338	0.0268715	0.480358	0.0981161	0.106173	0.0493521	0.119447	0.290588	0.0385123	0.0250815	0.0459342	0.0199478	0.16842	0.060339	0.0301552	0.0603327	0.0349172	0	0	1	0	0	0	0	0	1	0	0	0	0	0	0	0	0	1	0	0	0
chr1	132195518	132196150	0.0487235	0	0.41973	0.447353	0.0535471	0.0269836	0.770015	0.178943	0.020577	0.015736	0.0227858	0.734059	0.14249	0.0280531	0.0314517	0.0297181	0.352445	0.0472527	0.0286627	0.0249714	0.0188819	0.116882	0.0509231	0.0422215	0.0970004	0.0319486	0	0	1	1	0	0	0	0	1	0	0	0	0	0	0	0	0	1	0	0	0
chr1	132196357	132197382	0.155518	0.0873632	1.06512	0.232477	0.0592369	0.0267536	0.589107	0.302576	0.039625	0.00655949	0.0248877	0.666244	0.23537	0.0237154	0.0356459	0.0204446	0.462398	0.138576	0.0173545	0.0523211	0.0231924	0.270746	0.200871	0.0376502	0.113319	0.0424648	0	0	1	1	0	0	0	0	0	1	0	0	0	0	0	0	0	1	0	0	0
chr1	132238898	132239725	0.123558	0.032484	0.27014	0.0667097	0.054718	0.0260031	0.76194	0.178634	0.125024	0.0243899	0.197537	0.448116	0.124213	0.1404	0.0737502	0.209542	0.199938	0.0258548	0.0457232	0.0582233	0.100809	0.250773	0.0570474	0.0789037	0.0768309	0.125544	0	0	1	0	0	0	0	0	1	0	0	0	0	0	0	0	0	0.876663	0	0	0
chr1	132270403	132271421	0.0980061	0.0522896	1.00286	0.0634411	0.0684506	0.0272029	1.13858	0.22425	0.0391235	0.0199239	0.0240835	0.694417	0.111228	0.0412735	0.0568057	0.0609031	0.768154	0.0712861	0.0499358	0.0633583	0.019718	0.45219	0.0865029	0.0419029	0.0833287	0.0269923	0	0	1	0	0	0	0	0	1	0	0	0	0	0	0	0	0	1	0	0	0
chr1	132274186	132275188	0.185876	0	0.471071	0.120876	0.0599331	0.0329578	0.730883	0.231411	0.166545	0.0842951	0.476776	0.755348	0.235355	0.0973766	0.0969677	0.176385	0.226032	0.044145	0.0763439	0.0711399	0.0810294	0.0798186	0.0523725	0.0732276	0.0967682	0.0951383	0	0	1	0	0	0	0	0	0.612774	0.199601	0	0	0.187625	0	0	0	0	0.812375	0	0	0
chr1	132370568	132371255	0.105632	0.0130345	0.0866643	0.0618857	0.0739811	0.0872482	0.455991	0.105541	0.0262027	0.259593	0.0174111	0.380891	0.114899	0.0405463	0.173785	0.0325025	0.116836	0.0287533	0.0124197	0.104662	0.0542962	0.454388	0.192705	0.0699985	0.0273974	0.00670641	0	0	0	0	0	1	0	0	0	0	0	0	0	0.417758	0.582242	0	0	1	0	0	0
chr1	132383168	132384369	0.0725601	0.0372802	0.973733	0.117663	0.0559215	0.0369355	0.951821	0.282004	0.0342843	0.0587349	0.037944	0.99607	0.193889	0.0538888	0.0738249	0.0581549	0.247068	0.0389194	0.0290471	0.10219	0.0428497	0.316017	0.0580546	0.139447	0.0694017	0.0354184	0	0	1	0	0	0	0	0	0.666944	0.333056	0	0	0	0	0	0	0	1	0	0	0
chr1	132404739	132405771	0.164658	0.00867705	0.830042	0.198482	0.0683997	0.0794905	0.715322	0.14238	0.0523095	0.0519571	0.0753914	0.671522	0.161565	0.0723691	0.0394456	0.0618487	0.438265	0.0621774	0.0672017	0.0537374	0.0546895	0.420376	0.228096	0.0841941	0.0281494	0.0168086	0	0	1	1	0	1	0	0	1	0	0	0	0	0	0	0	0	1	0	0	0
chr1	132612594	132612992	0.519025	0.15687	0.0670973	0.0639664	0.0610366	0.0268147	0.572853	2.63236	0.102336	0.052228	0.0398557	0.343824	1.46797	0.143981	0.0403668	0.0465341	0.474671	2.45957	0.0913571	0.0500686	0.0510091	0.112392	2.07755	0.0485092	0.0173502	0.0278717	1	0	0	0	0	0	0	0	0	1	0	0	0	0	0	0	0	0	0.482412	0.517588	0
chr1	132624496	132625294	0.212877	0.0112215	0.136293	0.104335	0.0605703	0.144304	0.208706	0.0864381	0.260427	0.0322974	0.0300373	0.369507	0.13465	0.388395	0.0570316	0.0362069	0.290517	0.04982	0.370473	0.065691	0.0268488	0.471952	0.164698	0.159406	0.0210637	0.0256557	0	0	0	0	0	1	1	0	0	0	0	0	0	0	0	0	1	0	0	0	0
chr1	132637250	132638756	0.485174	0.523252	1.2022	0.519816	0.227685	0.0598557	0.862823	1.53365	0.0830589	0.0194576	0.0466324	0.881049	0.722312	0.178046	0.0404419	0.022078	1.11497	1.52517	0.601826	0.0751797	0.0268553	0.561351	0.617676	0.292403	0.0502472	0.056718	1	1	1	1	1	1	0	0	0	1	0	0	0	0	0	0	0.236388	0	0.763612	0	0
chr1	132760765	132761163	0.561319	0.0224993	0.234841	0.114071	0.108888	0.0468526	0.330763	0.242288	0.0755992	0.887102	0.0911046	0.240354	0.402802	0.0805314	0.655897	0.104839	0.143107	0.0818583	0.0584076	0.17455	0.0751954	0.426938	0.178431	0.0323074	0.243637	0.095288	1	0	0	0	0	0	0	0	0	0	0	0	0	0.08794	0.91206	0	0	0	0	0	0
chr1	132922000	132922398	0.427727	0.0849975	0.112196	0.0727413	0.0868793	0.0551457	0.248353	0.112192	0.0251216	0.573171	0.0406807	0.203312	0.16866	0.0314684	0.544177	0.0751364	0.52469	0.0362111	0.0164066	0.120067	0.0355177	0.784184	0.224357	0.0846061	0.0529751	0.0289959	1	0	0	0	0	0	0	0	0	0	0	0	0	1	0	0	0	0	0	0	0
chr1	132934460	132934876	0.0493481	0	0.0751123	0.0924669	0.0817901	0.0689329	0.12907	0.0794247	0.0156244	0.406815	0.0207476	0.0905326	0.0748306	0.0200583	0.349647	0.0387277	0.0760611	0.0353966	0.0287772	0.078699	0.0403156	0.104558	0.0286971	0.101477	0.0263952	0.0598249	0	0	0	0	0	1	0	0	0	0	0	0	0	1	0	0	0	0	0	0	0
chr1	132964709	132965378	0.4754	0.294476	0.24159	0.173554	0.159034	0.0793291	0.869752	0.19298	0.0952658	0.229057	0.0727803	0.701199	0.176828	0.125265	0.115849	0.133016	0.866057	0.215585	0.147076	0.0417648	0.0458723	0.571603	0.276922	0.205966	0.029898	0.0585963	1	1	0	0	0	1	0	0	1	0	0	0	0	0	0	0	0	1	0	0	0
chr1	132993572	132993970	0.513477	0.30999	0.0744534	0.0952502	0.0621463	0.0282388	0.712594	3.62277	0.0496833	0.736471	0.0632701	0.640256	2.53375	0.0651614	0.155208	0.0491594	0.672524	2.37178	0.0551264	1.04984	0.0882505	0.0531782	2.2055	0.0612097	0.0256445	0.0248735	1	0	0	0	0	0	0	0	0	0	0	0	0	0	1	0	0	0	1	0	0
chr1	133022318	133023763	1.23894	0.594917	1.51467	0.559796	0.261377	0.0983115	0.816208	0.395343	0.210072	0.0232646	0.0439265	0.881262	0.3049	0.244032	0.0332956	0.0316927	1.02992	0.687002	0.426366	0.0494245	0.0205943	0.506395	0.341505	0.09847	0.0330022	0.0140957	1	1	1	1	1	1	0	0	0	1	0	0	0	0	0	0	0.389619	0	0.610381	0	0
chr1	133031237	133032096	0.0783872	0.0208492	0.310596	0.0835508	0.0659781	0.0283219	1.08282	0.590907	0.494644	0.0324498	0.0317176	0.922152	0.225015	0.570988	0.0630742	0.022365	0.773268	1.49981	0.844268	0.0767955	0.0379371	0.508939	0.463138	0.335527	0.0842758	0.0189655	0	0	1	0	0	0	0	0.422584	0	0.577416	0	0	0	0	0	0	1	0	0	0	0
chr1	133038884	133039633	0.156227	0.0119556	0.27438	0.0524382	0.0711878	0.0370128	0.812552	0.127183	0.12347	0.0398711	0.0823126	0.738671	0.152325	0.100938	0.0766024	0.0892224	0.309783	0.0507776	0.0626389	0.07983	0.0392799	0.508736	0.10317	0.150406	0.050613	0.126787	0	0	1	0	0	0	0	0	1	0	0	0	0	0	0	0	0	1	0	0	0
chr1	133041646	133042393	0.0504289	0	0.281637	0.0801552	0.0508827	0.0327334	0.544739	0.131287	0.0270401	0.0321024	0.0675251	0.48401	0.116383	0.103378	0.0517243	0.1128	0.208552	0.0369319	0.0577443	0.0687631	0.0389391	0.34196	0.0535851	0.137026	0.0395266	0.101147	0	0	1	0	0	0	0	0	1	0	0	0	0	0	0	0	0	1	0	0	0
chr1	133049635	133050033	0.504838	0.0899972	0.0422797	0	0.0446114	0.0307603	0.262397	2.63499	0.0549317	0.043852	0.0209984	0.133651	1.81304	0.0608739	0.0453906	0.0356945	0.257457	2.36011	0.0742947	0.0490298	0.0484855	0.188279	1.9756	0.0441292	0.0195257	0.0168923	1	0	0	0	0	0	0	0	0	0	1	0	0	0	0	0	0	0	0	1	0
chr1	133096563	133096961	0.645267	0	0.0951463	0.0736311	0.0585029	0.0336251	0.510628	0.213435	0.045034	1.27909	0.0792401	0.309757	0.228505	0.0413242	0.728879	0.0658634	0.252759	0.101863	0.0694272	0.174973	0.0385285	0.484653	0.744569	0.0529029	0.103584	0.0172393	1	0	0	0	0	0	0	0	0	0	0	0	0	0	1	0	0	0	0	0	0
chr1	133215028	133215426	0.460996	0	0.108758	0.0971578	0.055386	0.0398828	0.449225	0.0720038	0.506613	0.0841844	0.0433129	0.806232	0.188667	0.346004	0.0711767	0.102278	0.194629	0.0316131	0.240999	0.0611675	0.024124	0.460914	0.0848727	0.513266	0.0763487	0.0778266	1	0	0	0	0	0	0.065327	0.934673	0	0	0	0	0	0	0	0	1	0	0	0	0
chr1	133343722	133344554	0.0740223	0.161443	0.177027	0.22034	0.16476	0.0247288	0.755951	0.147101	0.0789444	0.0242433	0.0159178	0.791899	0.134493	0.0691591	0.0334852	0.0301193	0.772165	0.229089	0.132938	0.0339291	0.0223212	0.441278	0.0777928	0.125576	0.0425784	0.00920949	0	0	0	1	1	0	0	0	1	0	0	0	0	0	0	0	0	1	0	0	0
chr1	133423655	133424053	0.501873	0.340615	0.0699848	0.0544288	0.0479862	0.0255582	0.272611	3.1429	0.0452424	0.0168932	0.0449629	0.228417	2.43717	0.0437106	0.0206249	0.0189905	0.270361	2.39513	0.0581611	0.0521599	0.0379288	0.0721803	2.05297	0.0360558	0.0455782	0.0260672	1	0	0	0	0	0	0	0	0	0.866834	0.133166	0	0	0	0	0	0	0	0.364322	0.635678	0
chr1	133424419	133424492	0.202476	1.43793	0.0108696	0	0.0808097	0.0312852	0.149823	1.46926	0.0409687	0	0.0234538	0.116112	1.04893	0.0246987	0	0.0175448	0.235409	2.0435	0.0562789	0.0587983	0.0461123	0.0722271	1.32829	0.016394	0.0048928	0.0147568	0	1	0	0	0	0	0	0	0	0	1	0	0	0	0	0	0	0	0	1	0
chr1	133425281	133425857	0.202348	0.0621856	0.246158	0.131279	0.0672592	0.0726947	0.834942	1.52816	0.0755795	0.0331213	0.0346649	0.787942	0.779401	0.0793638	0.0559339	0.0240202	1.08924	1.12612	0.0374388	0.0836615	0.0280292	0.30423	1.37703	0.0475217	0.0326019	0.0167745	0	0	0	0	0	1	0	0	0.098958	0.901042	0	0	0	0	0	0	0	0.098958	0.901042	0	0
chr1	133459603	133460352	0.0827732	0	0.346127	0.0970373	0.0488524	0.0223946	0.754175	0.132511	0.0385454	0.0672872	0.0456028	0.413238	0.109546	0.0555094	0.151943	0.0682076	0.0743747	0.031196	0.0387735	0.0926427	0.0459715	0.118577	0.032109	0.0572587	0.120055	0.0498594	0	0	1	0	0	0	0	0	1	0	0	0	0	0	0	0	0	1	0	0	0
chr1	133465962	133466980	0.0680597	0.0263891	0.487613	0.0643359	0.0640495	0.0330424	1.21048	0.373933	0.0519036	0.058726	0.0279464	0.826917	0.175958	0.0745611	0.0914465	0.0375285	0.111622	0.0247295	0.0420943	0.0955183	0.0304146	0.104225	0.0551723	0.0339904	0.197268	0.0460617	0	0	1	0	0	0	0	0	0.607073	0.392927	0	0	0	0	0	0	0	1	0	0	0
chr1	133475274	133476228	0.15332	0.0490184	0.422668	0.0787324	0.0572329	0.0291187	1.20389	0.459832	0.0556625	0.136813	0.0365902	0.838013	0.236582	0.047721	0.435884	0.0627542	0.104594	0.041412	0.0234829	0.1559	0.0385373	0.10367	0.0443031	0.0329885	0.363516	0.0541781	0	0	1	0	0	0	0	0	0.341719	0.658281	0	0	0	0	0	0	0	0	0	0	0
chr1	133512562	133513868	0.132156	0	1.48114	0.211135	0.166897	0.0230319	0.922764	0.221039	0.0568805	0.0263843	0.0225978	1.04299	0.164757	0.0976905	0.0277909	0.0362723	0.941079	0.13302	0.0964226	0.0571298	0.0239969	0.112744	0.0445674	0.0393615	0.118851	0.0240559	0	0	1	1	1	0	0	0	0.693721	0.306279	0	0	0	0	0	0	0	1	0	0	0
chr1	133534381	133535585	0.424302	0.0223124	1.45259	0.2624	0.19913	0.0294304	0.390115	0.798542	0.0264155	0	0.0240576	0.377729	0.431176	0.0595436	0.0374043	0.022535	0.491768	1.71421	0.145642	0.0461962	0.0444733	0.170582	0.158188	0.0361557	0.0474335	0.0376978	1	0	1	1	1	0	0	0	0.015781	0.498339	0.48588	0	0	0	0	0	0	0.181894	0.332226	0.48588	0
chr1	133632980	133633378	2.02735	0.0237493	0.168431	0.14739	0.0560473	0.0671666	0.564434	0.181104	0.075847	0.641941	0.0833844	1.13756	0.203741	0.0518676	0.327193	0.0832873	0.276342	0.0755806	0.0405926	0.260321	0.0299208	0.768665	0.387912	0.0901118	0.343658	0.0787149	1	0	0	0	0	0	0	0	0	0	0	0	0	0	1	0	0	0.050251	0	0	0
chr1	133649833	133651925	0.336586	0.128414	0.58534	0.0839284	0.0860266	0.0365614	1.39852	0.367514	0.0742101	0.119196	0.0351433	1.50645	0.217976	0.061602	0.136999	0.0377242	0.22856	0.041076	0.0310312	0.133604	0.0408782	0.716376	0.149856	0.0544324	0.347256	0.0516918	1	0	1	0	0	0	0	0	0.653442	0.346558	0	0	0	0	0	0	0	1	0	0	0
chr1	133807734	133808132	0.583886	0.0449987	0.0928775	0.0701975	0.0533677	0.0291184	0.190505	3.0362	0.289908	0.0276626	0.0299752	0.16994	1.78302	0.269167	0.061659	0.031291	0.233942	2.53294	0.19759	0.0558639	0.0630398	0.0613943	2.16102	0.0828077	0.0308115	0.0253176	1	0	0	0	0	0	0	0	0	0.331658	0.668342	0	0	0	0	0	0	0	0.331658	0.668342	0
chr1	133838993	133840017	0.658518	0.157407	0.775633	0.0895622	0.0636613	0.0321715	0.779241	0.231697	0.0514272	0.0322276	0.0135668	0.932127	0.16986	0.0971137	0.0718801	0.0396126	0.288209	0.0411659	0.0750124	0.0895554	0.0323049	0.345333	0.0885997	0.0764091	0.107986	0.0265482	1	1	1	0	0	0	0	0	0.414062	0.585938	0	0	0	0	0	0	0	1	0	0	0
chr1	133898475	133898873	0.692719	0	0.241509	0.269854	0.0646019	0.0768756	0.485155	0.132565	0.0591249	0.428101	0.0444325	0.982077	0.16788	0.0653637	0.0639158	0.0396747	0.190177	0.0278813	0.0800915	0.134651	0.0300207	0.50043	0.103565	0.110639	0.0213342	0.0246097	1	0	0	0	0	0	0	0	1	0	0	0	0	0	0	0	0	1	0	0	0
chr1	133900366	133900961	0.688403	0	0.0364205	0.0578442	0.0438052	0.0840625	0.273689	0.0833749	0.0265868	0.137012	0.0219427	0.568037	0.130981	0.0481414	0.0385138	0.0236922	0.112487	0.0338054	0.0266771	0.0840347	0.0173067	0.343084	0.0685785	0.0390058	0.0157349	0.00925678	1	0	0	0	0	1	0	0	1	0	0	0	0	0	0	0	0	1	0	0	0
chr1	133904080	133904478	0.930371	0.346239	0.0745221	0.00902905	0.0319646	0.0125906	0.182237	3.44435	0.0265932	0	0.0519754	0.112731	2.79022	0.0270461	0.025374	0.0379387	0.186545	2.46145	0.0446806	0.0310417	0.0350804	0.0458586	2.00486	0.021227	0.0076281	0.00292874	1	0	0	0	0	0	0	0	0	0	1	0	0	0	0	0	0	0	0	1	0
chr1	133907405	133907803	0.512189	0	0.0841468	0.157564	0.0480309	0.0345133	0.71308	0.16101	0.645859	0.0399806	0.0335306	0.799192	0.170045	0.394622	0.0516311	0.0216158	0.578822	0.12356	0.345126	0.0607573	0.0353678	0.492789	0.52225	0.111531	0.0327559	0.00802281	1	0	0	0	0	0	0	1	0	0	0	0	0	0	0	0	1	0	0	0	0
chr1	133923203	133924382	0.148569	0.113928	0.116083	0.148449	0.258724	0.0264715	0.23178	0.094574	0.960962	0.0513243	0.0220812	0.587387	0.171325	0.717842	0.0731753	0.0295378	0.968503	0.325768	0.459594	0.0551398	0.0238785	0.207424	0.0468899	0.596774	0.0504544	0.0130261	0	0	0	0	1	0	1	0	0	0	0	0	0	0	0	0.321459	0.678541	0	0	0	0
chr1	133991955	133992683	1.85084	0.755793	0.117451	0.228039	0.0979613	0.113037	0.496469	0.156461	0.0512127	0.314662	0.0731427	1.15638	0.30722	0.0545896	0.256971	0.0624898	0.370873	0.0599294	0.0466117	0.0998063	0.0428171	0.718245	0.229928	0.078142	0.0898363	0.037168	1	1	0	0	0	1	0	0	0	0	0	0	0	0.175824	0.824176	0	0	0.061813	0.549451	0	0
chr1	133996311	133996709	0.833532	0.157495	0.189949	0.207032	0.062651	0.0413654	0.344137	0.163586	0.0590077	0.281481	0.056729	0.711385	0.257294	0.0505598	0.275385	0.0648048	0.167264	0.0419286	0.0487549	0.136551	0.0543946	0.422362	0.094346	0.0812836	0.34578	0.0718581	1	0	0	0	0	0	0	0	0.726131	0	0	0	0.273869	0	0	0	0	0	0	0	0
chr1	134022583	134022981	0.763898	0.184994	0.153925	0.137725	0.101545	0.0426304	0.631462	0.190056	0.0872422	0.677276	0.0898272	0.769247	0.274986	0.0721721	0.381709	0.0608671	0.313716	0.0390765	0.0598431	0.110963	0.0569558	0.90865	0.259525	0.139939	0.167478	0.0504271	1	0	0	0	0	0	0	0	0	0	0	0	0	0	1	0	0	0	0	0	0
chr1	134046708	134047106	0.559256	0.271865	0.11962	0.0392955	0.071273	0.0388272	0.141564	0.169276	0.0380666	0.615616	0.0356128	0.348604	0.204698	0.0412163	0.449491	0.0850018	0.162471	0.0548829	0.0405106	0.1421	0.0389657	0.775327	0.106606	0.0390902	0.176711	0.0309253	1	0	0	0	0	0	0	0	0	0	0	0	0	1	0	0	0	0	0	0	0
chr1	134048773	134049184	0.0736738	0.0217876	0.0831495	0.0288165	0.0780842	0.0587148	0.131464	0.103529	0.0208337	0.165088	0.0402119	0.138545	0.125504	0.0189836	0.218387	0.0268159	0.0758622	0.0248183	0.0170925	0.0549706	0.0355919	0.163288	0.0554062	0.0204094	0.140797	0.0161295	0	0	0	0	0	1	0	0	0	0	0	0	0	1	0	0	0	0	0	0	0
chr1	134142810	134143208	1.08898	0.0674979	0.165268	0.179437	0.101612	0.0422703	0.478193	0.162384	0.0478731	0.489268	0.112161	1.19877	0.338454	0.0959423	0.251817	0.0663715	0.641757	0.0501517	0.0906464	0.103486	0.0679996	0.74194	0.265546	0.0864597	0.140148	0.0389065	1	0	0	0	0	0	0	0	0.502513	0	0	0	0.020101	0	0.477387	0	0	0.522613	0	0	0
chr1	134201053	134201911	0.188061	0.0950902	0.238886	0.118924	0.0785474	0.0370048	0.185143	0.176522	0.0451507	0.825221	0.0684478	0.353813	0.267734	0.0543798	0.741906	0.078084	0.135863	0.0509171	0.070188	0.309981	0.0525559	0.234114	0.0824147	0.0442077	0.664003	0.0805987	0	0	1	0	0	0	0	0	0	0	0	0	0	1	0	0	0	0	0	0	0
chr1	134252626	134252654	0.051322	0.772877	0.0273614	0.153648	0.0838267	0.0317924	0.372028	0.143422	0.452605	0	0.0569591	0.741018	0.18458	0.837489	0.09763	0.0430333	0.208075	0.082786	1.41479	0.0722763	0.046881	0.249935	0.0363334	0.120223	0.0527644	0.0222947	0	1	0	0	0	0	0	1	0	0	0	0	0	0	0	0	1	0	0	0	0
chr1	134263590	134265327	0.219382	1.17025	1.71144	1.25229	0.331934	0.0680321	1.10874	0.532691	0.223636	0.0514164	0.0461064	0.821929	0.806891	0.371887	0.0537285	0.0407723	0.502986	1.63634	0.847886	0.0690215	0.0586305	0.558895	0.734766	0.0881204	0.070642	0.029724	1	1	1	1	1	1	0	0.073115	0.460564	0.466321	0	0	0	0	0	0	0.188256	0.115141	0.696603	0	0
chr1	134270395	134271642	0.137339	0.359049	0.76421	0.31533	0.25826	0.0327923	1.69936	0.33261	0.39604	0.0527715	0.0480423	1.93554	0.281282	0.71408	0.0404801	0.0297313	1.61849	0.875515	1.12476	0.0614123	0.0299609	0.733599	0.135346	0.0846433	0.348694	0.0541582	0	1	1	1	1	0	0	0.35846	0.160385	0.481155	0	0	0	0	0	0	1	0	0	0	0
chr1	134273818	134274567	0.072906	0.0358666	0.246107	0.116567	0.0536007	0.0290182	1.27161	0.271649	0.333635	0.0449952	0.0308542	1.41643	0.181838	0.771835	0.0683019	0.0226347	1.17875	0.326053	1.25252	0.0651149	0.0374211	0.406756	0.0716271	0.0511738	0.332738	0.0406693	0	0	1	0	0	0	0	1	0	0	0	0	0	0	0	0	1	0	0	0	0
chr1	134278331	134279168	0.225707	0.0748901	0.278813	0.149362	0.0844844	0.0295284	1.01451	0.505552	0.167361	0.0243997	0.0297025	1.05418	0.315281	0.421991	0.0549714	0.0241508	1.10691	1.01496	0.746625	0.0596339	0.0274928	0.348	0.123141	0.0454083	0.464497	0.0455545	0	0	1	0	0	0	0	0.082437	0.439665	0.477897	0	0	0	0	0	0	1	0	0	0	0
chr1	134286477	134287359	0.154781	0.0710691	0.193608	0.196199	0.148191	0.0300593	0.719941	1.04326	0.0889257	0.135054	0.0446739	0.644822	0.722886	0.147914	0.0467561	0.021457	0.414025	2.22917	0.284964	0.140951	0.0438988	0.359797	0.16708	0.0535438	0.654533	0.0617513	0	0	0	1	1	0	0	0	0	1	0	0	0	0	0	0	0	0	1	0	0
chr1	134373846	134374244	0.643589	0.174995	0.0284614	0.0876202	0.0423242	0.0270074	0.107944	3.00423	0.0419997	0.0584223	0.0439807	0.101012	2.29305	0.053715	0.0491976	0.064212	0.150208	2.43458	0.0759353	0.0415803	0.0500723	0.0554262	1.95951	0.0325683	0.0212526	0.0150601	1	0	0	0	0	0	0	0	0	0	1	0	0	0	0	0	0	0	0	1	0
chr1	134687402	134687975	0.0605477	0.0312555	0.321223	0.399344	0.0565221	0.0333404	0.0673123	0.0746468	0.00664861	0.0957774	0.0340141	0.0702031	0.111434	0.0219513	0.173778	0.0401748	0.0560741	0.0222173	0.0223644	0.0876883	0.0437174	0.0362958	0.0364431	0.0112059	0.106072	0.0321338	0	0	0	1	0	0	0	0	0	0	0	0	1	0	0	0	0	0	0	0	0
chr1	134746048	134746909	0.0445864	0	0.381407	0.0667795	0.0460117	0.0282677	0.165697	0.142156	0.0378898	0.161222	0.059883	0.255207	0.0967742	0.0280332	0.248436	0.0582586	0.0673513	0.0425767	0.0634715	0.0919333	0.188916	0.0540628	0.0671928	0.0429874	0.129266	0.233435	0	0	1	0	0	0	0	0	0	0	0	0	1	0	0	0	0	0	0	0	0
chr1	134790601	134790999	0.616768	0.0149995	0.217448	0.0929609	0.0661044	0.0603395	0.315442	0.152423	0.0436275	0.46766	0.0474183	0.752869	0.201904	0.034893	0.31428	0.0819535	0.156954	0.0490589	0.0276725	0.0982237	0.0418641	0.57213	0.245738	0.043429	0.222357	0.108863	1	0	0	0	0	0	0	0	0	0	0	0	0	1	0	0	0	0.5	0	0	0
chr1	134942440	134942838	0.710641	0.0224993	0.0895091	0.0169136	0.0427951	0.0199959	0.426395	0.490866	0.0393429	1.45162	0.167575	0.280132	0.237715	0.0899022	0.564762	0.42084	0.484462	0.766441	0.0433681	1.65986	0.121607	0.237763	1.64583	0.0400101	0.321305	0.0187801	1	0	0	0	0	0	0	0	0	0	0	0	0	0	1	0	0	0	0	0	0
chr1	134969437	134970342	1.05995	0.0989472	0.127404	0.080926	0.0755527	0.100769	0.198736	0.0983677	0.0426226	0.676186	0.0525313	0.208894	0.177321	0.0630766	0.702393	0.0707886	0.174544	0.0582718	0.0805165	0.263586	0.0414096	0.897497	0.402411	0.135699	0.0829402	0.0198022	1	0	0	0	0	1	0	0	0	0	0	0	0	1	0	0	0	0	0	0	0
chr1	134973379	134973777	0.563511	0.0449987	0.0904027	0.13569	0.0618215	0.033332	0.189988	0.120672	0.0340034	0.651794	0.0377146	0.191514	0.210234	0.0439937	0.530028	0.0433161	0.203081	0.0332124	0.0608139	0.279376	0.0470487	0.635449	0.128521	0.23796	0.346908	0.0639329	1	0	0	0	0	0	0	0	0	0	0	0	0	1	0	0	0	0	0	0	0
chr1	135015174	135016145	0.134516	0.0184443	0.365702	0.296175	0.0931376	0.034731	0.988886	0.157097	0.0549493	0.0486141	0.0536788	1.28621	0.216111	0.0862441	0.0752164	0.0682594	1.19801	0.135526	0.0685316	0.0435941	0.050849	0.658984	0.17762	0.0670164	0.0588098	0.0287483	0	0	1	1	0	0	0	0	1	0	0	0	0	0	0	0	0	1	0	0	0
chr1	135027769	135028167	0.773829	0.247492	0.125051	0.0169136	0.0726518	0.0257676	0.0956326	3.09977	0.0775787	0.0816502	0.0576719	0.0810635	2.40075	0.238197	0.0572239	0.0337256	0.0864649	2.35457	0.0976736	0.102365	0.0626649	0.0629468	2.02852	0.0588757	0.037311	0.0232218	1	0	0	0	0	0	0	0	0	0	1	0	0	0	0	0	0	0	0	1	0
chr1	135029194	135030721	0.187005	0.416362	0.225432	0.745548	0.154157	0.0494822	0.229847	2.43742	0.730646	0.040765	0.0239965	0.0783944	1.36062	0.808137	0.0510822	0.0363366	0.179031	2.51304	1.01782	0.0532687	0.0606373	0.06782	1.96362	0.339464	0.027654	0.0137476	0	1	0	1	1	0	0	0	0	0.07924	0.92076	0	0	0	0	0	0	0	0	1	0
chr1	135141311	135141399	0.430989	2.10018	0.362227	0.255368	0.194666	0.0340222	0.350169	0.145544	0.0399932	0.402709	0.0314494	1.38176	0.286934	0.0415261	0.100648	0.024608	1.06176	0.122001	0.0578161	0.0694241	0.0244091	0.554315	0.0987311	0.0496788	0.31099	0.0528581	0	1	0	0	0	0	0	0	0	0	0	0	0	0	1	0	0	0	1	0	0
chr1	135164448	135164477	0.64772	0.926351	0.246253	0.397927	0.31759	0.0594379	0.34877	0.235704	0.0441466	0.726444	0.0636217	1.32153	0.472476	0.0779004	0.670348	0.0926873	1.09633	0.128951	0.293279	0.18309	0.0807559	0.37281	0.110894	0.0831006	0.568978	0.0262883	0	1	0	0	0	0	0	0	0	0	0	0	0	1	0	0	0	0	0	0	0
chr1	135446200	135446952	1.94983	0.0238158	0.136007	0.059767	0.0648393	0.0850977	0.16534	0.111575	0.0313887	0.496661	0.0667018	0.513788	0.157831	0.0417084	0.406235	0.0765298	0.227979	0.0367498	0.0279601	0.144533	0.0359031	0.647065	0.325118	0.0445239	0.133228	0.0483969	1	0	0	0	0	1	0	0	0	0	0	0	0	1	0	0	0	0	0	0	0
chr1	135467793	135468191	0.544814	0.0449987	0.0533479	0.115979	0.04469	0.0229864	0.139436	0.108048	0.0277002	0.350251	0.0832077	0.212513	0.0647765	0.0129028	0.278624	0.128615	0.106047	0.0347983	0.0251841	0.169848	0.0255982	0.18682	0.0613226	0.0706838	0.191654	0.180916	1	0	0	0	0	0	0	0	0	0	0	0	0.017588	0.982412	0	0	0	0	0	0	0
chr1	135506641	135507039	0.518897	0.258117	0.0648975	0.0326826	0.0464615	0.0202221	0.15342	2.59046	0.0688273	0.0218203	0.0225306	0.116855	1.95602	0.0751793	0.0475297	0.0419824	0.140376	2.08132	0.0732145	0.0523376	0.0433008	0.0801019	1.6117	0.0364677	0.0393914	0.0165592	1	0	0	0	0	0	0	0	0	0.09799	0.90201	0	0	0	0	0	0	0	0.09799	0.90201	0
chr1	135514246	135515150	0.125296	0	0.470926	0.111417	0.0648804	0.0226781	0.91587	0.373235	0.180609	0.029843	0.0268525	0.686601	0.168553	0.296844	0.0390088	0.0256326	0.603241	0.0676192	0.402185	0.0509293	0.0278423	0.144323	0.0427801	0.299565	0.0351882	0.0112321	0	0	1	0	0	0	0	0	0	1	0	0	0	0	0	0	1	0	0	0	0
chr1	135591474	135591872	1.34327	0.175619	0.145126	0.123355	0.0776188	0.0728461	0.35271	0.134798	0.113457	0.842054	0.0729542	1.05309	0.2735	0.141433	0.607897	0.0722359	0.322633	0.0733819	0.164968	0.170477	0.0343059	0.964342	0.214435	0.0987623	0.0734393	0.0497192	1	0	0	0	0	0	0	0	0	0	0	0	0	0.316583	0.683417	0	0	0	0	0	0
chr1	135650410	135651564	0.0864114	0.139675	0.94864	0.338988	0.151771	0.0390233	0.974965	0.394451	0.149541	0.0274562	0.0277625	1.16853	0.306693	0.341988	0.043255	0.0411886	1.1317	0.56742	0.508626	0.0577391	0.0298635	0.174064	0.042679	0.163878	0.100703	0.0130402	0	0	1	1	0	0	0	0	0	1	0	0	0	0	0	0	0.315425	0	0.684575	0	0
chr1	135674316	135675173	0.190497	0.0893962	0.320389	0.118472	0.0554266	0.0180318	1.08711	0.285949	0.515611	0.131279	0.0543515	0.853624	0.166379	0.912421	0.0676325	0.0617948	0.575491	0.0491073	0.985437	0.0734264	0.0325602	0.244194	0.033576	0.15222	0.100474	0.0334104	0	0	1	0	0	0	0	1	0	0	0	0	0	0	0	0	1	0	0	0	0
chr1	135693641	135695684	0.184363	0.136486	0.562067	0.141361	0.157542	0.0289472	1.30164	0.997168	0.241536	0.0582506	0.0348994	1.02217	0.72705	0.715808	0.0622118	0.0369132	0.684415	2.25383	0.856587	0.107672	0.0494618	0.448467	0.234502	0.117039	0.18789	0.022376	0	0	1	0	1	0	0	0.175722	0	0.824278	0	0	0	0	0	0	0.175722	0	0.824278	0	0
chr1	135697577	135698210	2.30317	0.0848788	0.134041	0.0772398	0.0608643	0.0761405	1.25211	1.46586	0.0663171	0.0602777	0.051786	1.00084	0.676179	0.0857553	0.0777956	0.0294315	1.17334	1.88688	0.0844594	0.114424	0.0379554	0.62067	1.0615	0.0394008	0.138191	0.0180654	1	0	0	0	0	1	0	0	0	1	0	0	0	0	0	0	0	0	0.963665	0.036335	0
chr1	135704346	135705215	0.140265	0.201513	0.143986	0.698047	0.0858307	0.0335208	0.515654	0.18292	0.0666841	0.302293	0.0654672	1.68722	0.270211	0.155147	0.104034	0.0436917	0.824323	0.0768923	0.110496	0.1449	0.0537562	0.224299	0.0753242	0.0663809	0.361415	0.0880467	0	1	0	1	0	0	0	0	1	0	0	0	0	0	0	0	0	1	0	0	0
chr1	135712109	135713039	0.336187	0.510322	0.294092	0.507117	0.0539884	0.047053	1.50313	0.298802	0.0541951	0.0456065	0.0218817	1.23998	0.264464	0.0793487	0.0344582	0.0344293	1.06848	0.138308	0.0941089	0.0751036	0.0260855	0.577067	0.237378	0.0309899	0.0955376	0.0363123	0	1	1	1	0	0	0	0	0.527957	0.472043	0	0	0	0	0	0	0	0.743011	0.256989	0	0
chr1	135721477	135723190	1.06434	1.08209	2.13892	1.86369	0.290724	0.0343933	1.17811	0.418989	0.0584526	0.0228957	0.0480074	1.20862	0.20554	0.0782514	0.0351354	0.0242798	1.45059	0.44742	0.17715	0.0503461	0.0255345	0.457657	0.061717	0.0674902	0.186725	0.032398	1	1	1	1	1	0	0	0	0.071804	0.928196	0	0	0	0	0	0	0	1	0	0	0
chr1	135728093	135728533	0.219752	0.0814066	0.147627	0.29839	0.0679682	0.0316809	0.6724	0.135155	0.0558258	0.226217	0.0287842	1.62972	0.195789	0.0996749	0.091577	0.0430498	0.832834	0.05091	0.118786	0.108605	0.0463434	0.197952	0.0893731	0.0589315	0.22091	0.0301078	0	0	0	1	0	0	0	0	1	0	0	0	0	0	0	0	0	1	0	0	0
chr1	135740358	135741062	0.267181	0	0.289664	0.506783	0.0917744	0.0298169	0.99546	0.191736	0.0631559	0.767654	0.0578682	1.5418	0.264753	0.101422	0.115592	0.0499343	1.00541	0.109373	0.065708	0.218487	0.053974	0.201331	0.0500572	0.0516271	0.302042	0.0624313	0	0	0	1	0	0	0	0	0	0	0	0	0	0	1	0	0	1	0	0	0
chr1	135788047	135788445	0.474407	0.0449987	0.122645	0.0967762	0.0902206	0.0544922	1.80164	0.306305	0.0972049	0.428804	0.0754292	2.72926	0.30068	0.184294	0.0809494	0.0415378	1.30988	0.125133	0.187145	0.199509	0.0584674	1.08863	0.375592	0.0884095	0.254161	0.0490113	1	0	0	0	0	0	0	0	0.497487	0	0	0	0	0	0.502513	0	0	1	0	0	0
chr1	135792020	135793206	0.342811	0.732384	0.835262	0.46474	0.230755	0.0425584	1.25997	0.553483	0.0722239	0.0283451	0.0393005	1.10209	0.467371	0.0903594	0.0510047	0.0377968	1.23075	0.763889	0.158098	0.0480991	0.0305628	0.567198	0.353587	0.0668476	0.0788397	0.0221161	1	1	1	1	1	0	0	0	0	1	0	0	0	0	0	0	0	0.342327	0.657673	0	0
chr1	135802835	135803418	0.0760588	0.162984	0.152999	0.361674	0.075912	0.0362914	0.53777	0.178213	0.0706534	1.23201	0.0673172	1.27217	0.225385	0.0837956	0.435681	0.0712245	0.192726	0.0377766	0.0403307	0.633877	0.0399739	0.17061	0.0823872	0.0424894	0.582264	0.0310425	0	0	0	1	0	0	0	0	0	0	0	0	0	0.283019	0.716981	0	0	0	0	0	0
chr1	135804488	135805168	0.0834738	0.223868	0.40004	0.228729	0.0691454	0.02401	1.37084	0.733099	0.0396135	0.370946	0.0485056	1.56108	0.472473	0.0681175	0.171255	0.0242251	0.697116	0.12275	0.0401552	0.855552	0.0654215	0.375042	0.257319	0.0299512	0.582281	0.0487687	0	1	1	0	0	0	0	0	0	0	0	0	0	0	1	0	0	0	1	0	0
chr1	135847887	135848972	0.264794	0.0412661	0.454755	0.559826	0.0824469	0.0316257	1.45183	0.476526	0.0762575	0.0362511	0.0416259	1.73078	0.368882	0.0621923	0.0689403	0.0229951	1.01387	0.103761	0.0714722	0.103603	0.0372436	0.848382	0.269204	0.0592599	0.0680779	0.030468	0	0	1	1	0	0	0	0	0.342857	0.657143	0	0	0	0	0	0	0	0.368664	0.631336	0	0
chr1	135850306	135851302	0.11429	0.0359627	0.424376	0.296008	0.0677987	0.0378527	1.50125	0.243057	0.0536535	0.024133	0.0366249	1.32348	0.190846	0.079807	0.0453411	0.0294575	0.512617	0.035517	0.0644842	0.100162	0.0212518	0.628147	0.110614	0.0693564	0.0524003	0.0239999	0	0	1	1	0	0	0	0	0.704819	0.295181	0	0	0	0	0	0	0	0.799197	0.200803	0	0
chr1	135859497	135860285	0.0212322	0	0.256357	0.0804806	0.0603766	0.0289063	0.469599	0.126841	0.0437942	0.0472834	0.051005	0.425766	0.106438	0.086586	0.0772913	0.0713226	0.417645	0.0414523	0.0578542	0.0935941	0.0430905	0.0983393	0.0328939	0.053114	0.173326	0.0460807	0	0	1	0	0	0	0	0	1	0	0	0	0	0	0	0	0	1	0	0	0
chr1	135963789	135964187	0.470022	0.295615	0.0942524	0.114325	0.0561259	0.0364231	0.428887	0.1632	0.0470396	0.705924	0.0784153	1.95273	0.212499	0.0873807	0.272854	0.0241139	0.838432	0.0781399	0.0877755	1.49895	0.0985077	0.604857	0.193356	0.0475618	0.2074	0.0294401	1	0	0	0	0	0	0	0	0	0	0	0	0	0.027638	0.972362	0	0	0.972362	0	0	0
chr1	135968748	135970442	0.168357	0.549758	0.43859	0.654094	0.227193	0.0376703	0.852664	0.153882	0.0298203	0.526272	0.0372205	1.2286	0.245154	0.258009	0.0669371	0.0244328	1.36617	0.828873	0.438768	0.083847	0.038501	0.574159	0.183686	0.103896	0.0730134	0.0221953	0	1	1	1	1	0	0	0	0.260921	0	0	0	0	0	0.739079	0	0.527745	0.472255	0	0	0
chr1	135973946	135974329	0.26599	0.266928	0.196316	0.632604	0.239797	0.048792	1.04047	0.458089	0.26429	1.27755	0.0649929	0.337714	2.13125	1.46851	0.0905436	0.0436926	0.379811	2.46521	1.96098	0.152168	0.109506	0.521433	1.35968	0.600244	0.064983	0.0216215	0	0	0	1	0	0	0	0	0	0	0	0	0	0	1	0	0	0	0.522193	0.477807	0
chr1	135974478	135975171	0.0947939	0.167982	0.188174	0.41024	0.181388	0.0339082	1.16178	0.864245	0.0495883	0.767833	0.0680374	0.146637	1.85605	0.702538	0.0595867	0.0440274	0.114993	2.54446	0.911726	0.0954971	0.0720003	0.302583	1.98821	0.204527	0.0338057	0.013791	0	0	0	1	0	0	0	0	0	0	0	0	0	0	1	0	0	0	0	1	0
chr1	135975480	135975878	0.770349	0.258117	0.103808	0.0947415	0.0605881	0.0314137	0.591396	2.32468	0.0250435	0.418388	0.0257716	0.111501	1.42807	0.111892	0.0221556	0.0302959	0.103821	2.01716	0.131239	0.0554129	0.0377039	0.0612207	1.39953	0.0319779	0.0161264	0.0148519	1	0	0	0	0	0	0	0	0	0	0	0	0	0	1	0	0	0	0.19598	0.80402	0
chr1	135978884	135981197	0.156984	0.0580721	0.226521	0.178187	0.180441	0.0313426	0.784163	0.178894	0.0531295	1.31512	0.0810789	1.61728	0.240318	0.147445	0.131041	0.0374931	1.6049	0.237507	0.204903	0.139558	0.033677	0.592597	0.166403	0.0925944	0.0910778	0.0267596	0	0	1	1	1	0	0	0	0	0	0	0	0	0.135322	0.864678	0	0	1	0	0	0
chr1	135988920	135989999	0.203338	0.448151	0.369746	0.309873	0.184611	0.0409013	1.28485	1.1685	0.0577166	0.559329	0.0639635	1.25867	0.662946	0.0866133	0.0454726	0.0244896	1.19354	1.27849	0.111266	0.0595643	0.0283034	0.520275	0.833641	0.0642338	0.0664003	0.0228552	0	1	1	1	1	0	0	0	0	0	0	0	0	0	1	0	0	0	1	0	0
chr1	136006818	136007628	0.205351	0.0994969	0.0652622	0.10254	0.143602	0.0313441	0.172799	0.104145	0.0205345	0.357305	0.147749	0.364784	0.157732	0.0544426	0.334844	0.165079	0.657116	0.212234	0.0486109	0.0553085	0.0716493	0.380154	0.105109	0.0615348	0.0861867	0.0897675	0	0	0	0	1	0	0	0	0	0	0	0	0	1	0	0	0	0	0	0	0
chr1	136048854	136050129	0.142293	0.0561864	0.898615	0.142313	0.0664966	0.0298782	0.931459	0.230548	0.0465798	0.234113	0.0930364	1.59369	0.288695	0.0801	0.149402	0.13263	0.328223	0.04303	0.0417396	0.114508	0.0393293	0.343783	0.0796472	0.0267576	0.235374	0.0266339	0	0	1	0	0	0	0	0	0.843137	0	0	0	0	0	0.156863	0	0	1	0	0	0
chr1	136051591	136052554	0.181999	0.0371952	0.362944	0.166399	0.0813403	0.0319036	0.593278	0.164222	0.048748	0.21728	0.150741	0.949403	0.228224	0.102958	0.139006	0.141074	0.255994	0.0499207	0.0595346	0.116017	0.113891	0.136537	0.0744704	0.0920993	0.158677	0.207723	0	0	1	0	0	0	0	0	1	0	0	0	0	0	0	0	0	0.792316	0.207684	0	0
chr1	136230928	136231506	0.109037	0.0619704	0.100404	0.425049	0.0752484	0.0404412	0.375555	0.142001	0.0568541	0.47746	0.0407938	0.954107	0.21536	0.0501051	0.313064	0.0438362	0.208186	0.0380484	0.0345226	0.150451	0.0238977	0.531019	0.10981	0.0674006	0.109508	0.0345894	0	0	0	1	0	0	0	0	0	0	0	0	0	0.307958	0.692042	0	0	0.529412	0	0	0
chr1	136258491	136258889	1.06422	0.186244	0.0665474	0.0873656	0.0645234	0.0275184	0.0564798	2.58041	0.0597764	0	0.0586344	0.116181	1.43133	0.0601865	0.0212137	0.0236058	0.110335	2.382	0.0609912	0.0485377	0.0291087	0.0692761	1.71672	0.0329665	0.0272218	0.0144077	1	0	0	0	0	0	0	0	0	0	1	0	0	0	0	0	0	0	0	1	0
chr1	136295780	136296178	1.46139	0	0.0981025	0.209067	0.0535922	0.0336168	0.338697	0.17125	0.0558304	0.122687	0.24157	0.798955	0.157814	0.120642	0.122396	0.145404	0.261034	0.0456337	0.0805426	0.163273	0.153902	0.398088	0.184331	0.0993115	0.0612153	0.089514	1	0	0	0	0	0	0	0	1	0	0	0	0	0	0	0	0	1	0	0	0
chr1	136311620	136312018	0.581176	0.134996	0.0670286	0.0592609	0.0516636	0.0225927	0.463269	1.20356	0.0429764	0.0218907	0.0339432	0.29324	0.679171	0.0805722	0.0131874	0.013486	0.465003	1.70515	0.0700971	0.0316158	0.0213131	0.162412	1.2175	0.0258679	0.00979009	0.0157958	1	0	0	0	0	0	0	0	0	0.452261	0.547739	0	0	0	0	0	0	0	0.452261	0.547739	0
chr1	136322451	136323607	0.316412	0.937303	1.74888	1.19012	0.326382	0.0367551	0.785762	0.239491	0.572693	0.0232646	0.0390964	0.901814	0.149295	0.835783	0.0592469	0.0359495	0.894981	0.291227	0.910584	0.0524674	0.0423112	0.337441	0.09741	0.606037	0.0313421	0.0207259	1	1	1	1	1	0	0	1	0	0	0	0	0	0	0	0	1	0	0	0	0
chr1	136351942	136352340	0.712966	0.112496	0.0783032	0.0172951	0.0407433	0.0226179	0.133722	3.40945	0.0529652	0.0797497	0.0286592	0.129328	2.43916	0.0590945	0.0391501	0.047508	0.128988	2.36298	0.0755114	0.0587619	0.0280594	0.0433027	1.97154	0.0287924	0.02249	0.0122008	1	0	0	0	0	0	0	0	0	0.145729	0.854271	0	0	0	0	0	0	0	0	1	0
chr1	136356846	136358168	0.185722	0.0135472	0.439397	0.133693	0.183881	0.0304906	0.620591	0.125475	0.701211	0.0286714	0.0275698	0.924401	0.125956	0.948202	0.0716525	0.0345585	1.04687	0.372659	0.89661	0.0599652	0.0365169	0.364752	0.0671031	0.307013	0.0500646	0.0215458	0	0	1	1	1	0	0	1	0	0	0	0	0	0	0	0	1	0	0	0	0
chr1	136387777	136388533	0.275415	0.0236897	0.125551	0.413143	0.0867602	0.0373006	0.349831	0.0946201	0.57092	0.0823388	0.0388208	1.04555	0.1396	0.480044	0.0646838	0.0361231	0.784578	0.0961945	0.841199	0.0546176	0.0472624	0.425829	0.118044	0.151731	0.0393066	0.0192695	0	0	0	1	0	0	0.470899	0.529101	0	0	0	0	0	0	0	0	1	0	0	0	0
chr1	136391279	136391677	0.715029	0.177494	0.0796094	0.0942328	0.0464387	0.0330975	0.177434	3.75253	0.0825929	0.0575071	0.0487147	0.146243	3.12439	0.0749904	0.0224304	0.0457297	0.305577	2.41909	0.0973455	0.0433026	0.0391906	0.0757395	2.14117	0.0563494	0.0263108	0.0236243	1	0	0	0	0	0	0	0	0	0	1	0	0	0	0	0	0	0	0	1	0
chr1	136415124	136415644	0.144886	0.0516618	0.118496	0.0463309	0.0986418	0.067758	0.509602	0.158595	0.073542	0.138133	0.0434496	0.714134	0.176243	0.120407	0.0597946	0.0420981	0.462292	0.0455667	0.0854318	0.0702096	0.0427229	0.390805	0.185776	0.0686865	0.0399844	0.0304689	0	0	0	0	0	1	0	0	1	0	0	0	0	0	0	0	0	1	0	0	0
chr1	136423035	136424194	0.0954703	0.363134	0.194103	0.482073	0.276718	0.0345113	0.614423	0.110346	0.0668359	0.116409	0.038044	1.21241	0.182698	0.105317	0.0468691	0.039666	0.990454	0.386044	0.0886233	0.0507028	0.0398121	0.494055	0.0949279	0.0844263	0.0695586	0.0397239	0	1	0	1	1	0	0	0	1	0	0	0	0	0	0	0	0	1	0	0	0
chr1	136453350	136453748	0.533339	0.0674979	0.0384986	0.0122083	0.0392522	0.0214116	0.229719	2.2912	0.0397075	0.0265364	0.0297199	0.194092	1.42151	0.0409197	0.0264533	0.0176991	0.546512	1.73152	0.0231059	0.10555	0.0234994	0.105928	1.60317	0.036097	0.0217285	0.0168507	1	0	0	0	0	0	0	0	0	0.125628	0.874372	0	0	0	0	0	0	0	0.125628	0.874372	0
chr1	136456611	136457009	1.08627	0.202494	0.0879965	0.0696888	0.0378507	0.0262116	0.609453	3.02822	0.0471959	0.0679951	0.034336	0.44093	2.57784	0.0813674	0.0240984	0.0313756	0.777872	1.93814	0.0518858	0.339231	0.0475734	0.18314	1.92335	0.0660563	0.0405608	0.0191964	1	0	0	0	0	0	0	0	0	1	0	0	0	0	0	0	0	0	0.977387	0.022613	0
chr1	136477181	136477974	0.10478	0	0.297353	0.772414	0.0595457	0.028106	0.886743	0.104999	0.30613	0.0434172	0.0363292	1.00844	0.225454	0.172134	0.0356738	0.0255333	0.513194	0.042823	0.0685098	0.038232	0.0304855	0.438439	0.0765663	0.151543	0.0418539	0.0211988	0	0	0	1	0	0	0	0.723834	0.276166	0	0	0	0	0	0	0	0	1	0	0	0
chr1	136502798	136503612	0.262096	0.0330026	0.680908	0.105082	0.0505047	0.0216426	0.601565	0.0616048	0.336285	0.0165196	0.0363332	0.527534	0.0652759	0.63918	0.0332182	0.0300193	0.126623	0.0133848	0.146587	0.025804	0.0239143	0.165691	0.0230827	0.484791	0.0203039	0.0111641	0	0	1	0	0	0	0	0.7543	0.2457	0	0	0	0	0	0	0	1	0	0	0	0
chr1	136525670	136526643	0.124217	0.0920321	0.439611	0.0509258	0.0545194	0.0274227	0.512824	0.158434	1.1968	0.105349	0.277982	0.740557	0.166071	1.24601	0.0883068	0.0723364	0.279973	0.0543195	0.317101	0.0712982	0.0475811	0.154329	0.0555089	0.870051	0.0627939	0.0144723	0	0	1	0	0	0	0	1	0	0	0	0	0	0	0	0	1	0	0	0	0
chr1	136687185	136688111	0.199524	0.00967033	0.531006	0.116313	0.0377413	0.0258982	0.329167	0.0796204	0.03818	0.054728	0.0325466	0.461308	0.0859359	0.0505316	0.0696864	0.0274531	0.178374	0.0276389	0.0295347	0.0498309	0.0261767	0.127843	0.0430654	0.0865969	0.0691603	0.0158154	0	0	1	0	0	0	0	0	1	0	0	0	0	0	0	0	0	1	0	0	0
chr1	136749321	136749971	0.266085	0.0275529	0.268731	0.0644741	0.0441832	0.0185732	0.496726	0.0799349	0.231434	0.0492192	0.0284452	0.451468	0.130762	0.252106	0.0388478	0.0103317	0.176648	0.026881	0.118985	0.0426257	0.0133944	0.130295	0.0199536	0.272384	0.048614	0.00831206	0	0	1	0	0	0	0	1	0	0	0	0	0	0	0	0.263077	0.736923	0	0	0	0
chr1	136858995	136859393	0.70613	0.292491	0.0439296	0.00712153	0.0441405	0.031464	0.103141	2.46401	0.0440573	0.0160485	0.0236895	0.0716244	1.80733	0.0398411	0.0257861	0.0374941	0.138396	2.00017	0.0377351	0.0422228	0.0190519	0.0871006	1.64205	0.0251265	0.0190362	0.0210842	1	0	0	0	0	0	0	0	0	0	1	0	0	0	0	0	0	0	0	1	0
chr1	137027379	137028366	1.34488	0.2936	0.776183	0.291938	0.075804	0.0309826	1.32829	1.58765	0.0755375	0.0834191	0.0352322	1.48527	0.42414	0.0578962	0.0484293	0.0182864	1.1127	0.154187	0.0421924	0.125063	0.0389113	0.642687	1.18925	0.0777179	0.0438037	0.0128566	1	0	1	1	0	0	0	0	0	1	0	0	0	0	0	0	0	0.021277	0.978723	0	0
chr1	137029076	137029474	1.23972	0.0449987	0.163619	0.00203472	0.0677411	0.0334994	0.597112	2.45824	0.081095	0.0490607	0.0451986	0.830003	0.941625	0.113942	0.046411	0.0259982	0.968106	0.493641	0.0746228	0.0759707	0.0362673	0.529802	1.5894	0.0854438	0.0285135	0.0212785	1	0	0	0	0	0	0	0	0	1	0	0	0	0	0	0	0	0	1	0	0
chr1	137029617	137030015	1.04372	0.231243	0.119552	0.0600241	0.0661044	0.0261194	0.645627	3.10996	0.239365	0.0675024	0.0328432	0.895105	1.29973	0.161009	0.0327134	0.0325612	1.04364	0.63694	0.129585	0.113464	0.0370793	0.500831	1.84684	0.109472	0.0372022	0.0255814	1	0	0	0	0	0	0	0	0	1	0	0	0	0	0	0	0	0	1	0	0
chr1	137030425	137031289	0.523259	0.0932783	0.371278	0.0943148	0.063489	0.0307395	0.813931	2.71248	0.884323	0.0836544	0.0533682	1.14713	0.754151	0.605841	0.0359875	0.0386294	0.85272	0.239268	0.168328	0.0713515	0.0349724	0.713867	1.07027	0.37975	0.036454	0.0193288	1	0	1	0	0	0	0	0	0	1	0	0	0	0	0	0	0	0	1	0	0
chr1	137031758	137032156	0.499036	0.0449987	0.154888	0.137725	0.0707683	0.0316985	1.37701	1.44356	1.42085	0.1595	0.0416236	1.32582	0.287669	1.10791	0.0699796	0.0530337	0.29733	0.0860827	0.333642	0.0763945	0.0327942	0.762199	0.186766	0.773059	0.0662867	0.0243877	1	0	0	0	0	0	0	0	0	1	0	0	0	0	0	0	1	0	0	0	0
chr1	137043354	137043752	0.439848	0.202494	0.019868	0.0169136	0.0296774	0.016243	0.179988	3.42411	0.0448647	0.0349828	0.0433129	0.19659	2.78109	0.0814753	0.0377764	0.01844	0.543752	2.05571	0.0323483	0.1092	0.0365171	0.114225	2.04591	0.046889	0.0271946	0.0376017	1	0	0	0	0	0	0	0	0	0	1	0	0	0	0	0	0	0	0.38191	0.61809	0
chr1	137043875	137044273	0.625795	0.246867	0.0987211	0.0370064	0.0438938	0.0289927	0.333741	3.8507	0.130922	0.0787645	0.0465933	0.505971	2.77558	0.147931	0.0402491	0.0531819	1.04913	2.24768	0.0307487	0.366213	0.059342	0.213262	2.24909	0.069393	0.0434162	0.0462075	1	0	0	0	0	0	0	0	0	0.68593	0.31407	0	0	0	0	0	0	0	1	0	0
chr1	137051124	137051639	0.162736	0.347757	0.0586013	0.288546	0.0685283	0.0291259	0.879007	0.156916	1.07143	0.0419946	0.0357195	1.18635	0.227002	0.65633	0.0336075	0.0231186	0.713507	0.133856	0.230139	0.0501234	0.0111223	0.40098	0.132989	0.528343	0.0506391	0.0117138	0	0	0	1	0	0	0	1	0	0	0	0	0	0	0	0	1	0	0	0	0
chr1	137100778	137102005	0.21014	0.182451	0.859198	0.184758	0.167944	0.0314356	0.876267	0.288702	0.0561829	0.0615087	0.0450534	1.21737	0.205797	0.100897	0.0694279	0.0861975	1.23138	0.139289	0.116445	0.0774924	0.0439679	0.246461	0.0620391	0.0366404	0.296904	0.0864761	0	1	1	1	1	0	0	0	0.348003	0.651997	0	0	0	0	0	0	0	1	0	0	0
chr1	137209995	137210393	0.532435	0.256242	0.0627663	0.0572262	0.0564172	0.0327791	0.176005	3.45429	0.0769665	0.113959	0.0414075	0.170911	3.01744	0.0956321	0.0517292	0.0475716	0.352961	2.50544	0.102322	0.0924278	0.0862641	0.137562	2.2021	0.0542759	0.0449527	0.032813	1	0	0	0	0	0	0	0	0	0	1	0	0	0	0	0	0	0	0	1	0
chr1	137284298	137284749	0.0746505	0	0.055269	0.0562246	0.103819	0.0658823	0.110201	0.0695477	0.974708	0.0665888	0.0275447	0.0784666	0.13909	0.899017	0.0304277	0.0218967	0.0426107	0.0499624	0.719826	0.0654631	0.0368672	0.0587618	0.0467182	0.536931	0.0565412	0.0356695	0	0	0	0	0	1	1	0	0	0	0	0	0	0	0	1	0	0	0	0	0
chr1	137305496	137305958	0.128527	0.07753	0.0778203	0.0800833	0.0803399	0.0637869	0.11889	0.0825947	0.81225	0.0233454	0.027735	0.094672	0.107162	0.762123	0.0969872	0.0487329	0.0459134	0.0260741	0.59368	0.058405	0.0389921	0.0546188	0.0449275	0.420306	0.0369099	0.0495159	0	0	0	0	0	1	1	0	0	0	0	0	0	0	0	1	0	0	0	0	0
chr1	137326781	137327179	0.625277	0.195619	0.0945964	0.0507406	0.0469211	0.0211687	0.226376	3.40681	0.0458545	0.0263956	0.0493825	0.224371	2.25144	0.0476071	0.0454102	0.0434855	0.347568	2.44735	0.0835371	0.0580786	0.0551315	0.0941659	2.06447	0.058944	0.0567009	0.0343121	1	0	0	0	0	0	0	0	0	0.449749	0.550251	0	0	0	0	0	0	0	0.449749	0.550251	0
chr1	137577321	137577719	0.544039	0.0449987	0.095765	0.0445094	0.0633462	0.0315812	0.132749	0.0777787	0.0204073	0.239461	0.0323324	0.169305	0.144879	0.0210598	0.376842	0.041432	0.0763192	0.0453272	0.0245825	0.137002	0.0361798	0.389671	0.110967	0.157473	0.039337	0.0271776	1	0	0	0	0	0	0	0	0	0	0	0	0	1	0	0	0	0	0	0	0
chr1	137583305	137583703	0.447327	0.124371	0.102502	0.0707061	0.0575386	0.0326116	0.0877292	0.12898	0.0443698	0.834311	0.0483611	0.244459	0.159198	0.0428477	0.573044	0.1063	0.16202	0.0819379	0.0410712	1.65082	0.0887378	0.415229	1.51156	0.0660426	0.0598283	0.0262477	1	0	0	0	0	0	0	0	0	0	0	0	0	1	0	0	0	0	0	0	0
chr1	137584491	137584889	0.594715	0.0968719	0.0997524	0.0169136	0.0246546	0.00956653	0.138069	0.12636	0.0337039	0.69079	0.0638791	0.0975021	0.153687	0.0296617	0.320285	0.160646	0.201005	0.290102	0.0279596	1.60855	0.0727342	0.0968422	1.80715	0.0353144	0.0190362	0.00856414	1	0	0	0	0	0	0	0	0	0	0	0	0	1	0	0	0	0	0	0	0
chr1	137610988	137611386	1.69724	0.112496	0.183693	0.0984292	0.0648148	0.0982872	0.43442	0.18967	0.0432238	0.117337	0.0369878	0.949001	0.198179	0.0695701	0.045371	0.0445652	0.58711	0.0526174	0.0471553	0.111345	0.0436631	0.515256	0.418573	0.0572555	0.0435114	0.0230274	1	0	0	0	0	0	0	0	1	0	0	0	0	0	0	0	0	1	0	0	0
chr1	137616113	137616511	0.655711	0.0449987	0.0574727	0.0338272	0.0239033	0.0391706	0.379703	0.146885	0.0267235	0.0764415	0.0474575	0.335139	0.0653805	0.036821	0.0859535	0.0207477	0.327194	0.0513512	0.0252388	0.0475399	0.0159661	0.35987	0.306576	0.0692007	0.0154465	0.00631556	1	0	0	0	0	0	0	0	0.781407	0	0	0	0.218593	0	0	0	0	1	0	0	0
chr1	137625619	137626017	0.884982	0.0899972	0.0972086	0.0887645	0.0498921	0.026287	0.330276	0.232606	0.0540459	1.3725	0.0720114	0.457726	0.222389	0.0176083	0.758021	0.0673878	0.478303	2.22246	0.0588723	0.0646394	0.0190644	0.166386	1.98572	0.0558276	0.0522545	0.0280521	1	0	0	0	0	0	0	0	0	0	0	0	0	0	1	0	0	0	0	0	0
chr1	137632829	137633688	0.181688	0.0474899	0.256446	0.0707648	0.0592923	0.0289584	0.153238	0.100512	0.0255661	0.391158	0.0812102	0.1269	0.195503	0.0492192	0.581825	0.121507	0.159716	0.0425339	0.260142	0.0901962	0.158474	0.306984	0.0726647	0.464477	0.0769424	0.146682	0	0	1	0	0	0	0	0	0	0	0	0	0	1	0	0	0	0	0	0	0
chr1	137657883	137658974	0.220248	0.00820782	0.279883	0.298068	0.234209	0.0328209	0.278431	0.0710013	0.0108605	0.201443	0.0520025	0.393566	0.0907586	0.038197	0.116591	0.0614157	0.754171	0.129984	0.0801862	0.0400707	0.0249112	0.325922	0.0724993	0.0422898	0.0678377	0.0248925	0	0	1	1	1	0	0	0	1	0	0	0	0	0	0	0	0	1	0	0	0
chr1	137667558	137668352	1.03782	0.11278	0.244392	0.063809	0.091819	0.0493388	0.393369	0.189502	0.136011	0.422193	0.0558086	1.07342	0.187112	0.416993	0.299136	0.0561069	0.982351	0.105613	0.66614	0.144726	0.0538805	0.603862	0.268394	0.268251	0.175534	0.0284219	1	0	1	0	0	0	0	0	0	0	0	0	0.191436	0.251889	0.556675	0	1	0	0	0	0
chr1	137676292	137677135	0.248635	0.0318674	0.295911	0.0754102	0.0810989	0.0302436	0.480595	0.140002	0.0302631	0.426067	0.0508675	0.73486	0.134865	0.044259	0.342731	0.0592227	0.831426	0.0554663	0.0365608	0.141373	0.0248552	0.146875	0.0385433	0.050822	0.256001	0.0299416	0	0	1	0	0	0	0	0	0	0	0	0	0	0.474496	0.525504	0	0	0	0	0	0
chr1	137837506	137839161	0.152291	0.649284	0.402519	0.688618	0.310989	0.0284793	0.906011	0.287449	0.0444848	0.354084	0.0560103	1.168	0.265789	0.0427438	0.192339	0.0510912	1.22161	0.807624	0.104572	0.113224	0.0373172	0.253099	0.065715	0.0275016	0.348754	0.0431201	0	1	1	1	1	0	0	0	0.661027	0	0	0	0	0	0.338973	0	0	0.540181	0.241692	0	0
chr1	137910605	137912656	0.330302	0.0654903	1.48691	0.137083	0.20026	0.0366598	1.32921	0.259902	0.0519586	0.0484757	0.03572	1.1687	0.167995	0.113208	0.0626165	0.0754242	1.46454	0.301626	0.160322	0.0631918	0.0379814	0.56633	0.134045	0.0860652	0.0889916	0.0359178	1	0	1	1	1	0	0	0	0.709898	0.290102	0	0	0	0	0	0	0	1	0	0	0
chr1	137944283	137945160	0.0784755	0.0204213	0.662601	0.136143	0.049034	0.0288583	0.927002	0.128281	0.0226064	0.294968	0.036139	0.878382	0.153494	0.0288006	0.21716	0.0275458	0.102406	0.0229836	0.0278467	0.431813	0.0337227	0.126393	0.0282912	0.0291179	0.250927	0.0278108	0	0	1	0	0	0	0	0	0	0	0	0	0	0	1	0	0	1	0	0	0
chr1	137999268	138000241	0.205552	0.0411589	0.345266	0.365479	0.0518595	0.0295883	1.27414	0.306417	0.0481777	0.0826327	0.0402546	1.32938	0.255308	0.0761511	0.0411632	0.0260664	0.701209	0.0521879	0.036631	0.0793545	0.0292814	0.63031	0.128872	0.0576063	0.121589	0.0364392	0	0	1	1	0	0	0	0	0.453237	0.546763	0	0	0	0	0	0	0	1	0	0	0
chr1	138031159	138031557	0.712319	0	0.0837342	0.0169136	0.0551616	0.0337005	1.80832	0.736654	0.20057	0.0337863	0.0276181	1.6935	0.169893	0.135622	0.0478632	0.0169158	1.09858	0.102556	0.112836	0.105673	0.0184272	0.800348	0.771598	0.106149	0.0440689	0.0110487	1	0	0	0	0	0	0	0	0	1	0	0	0	0	0	0	0	1	0	0	0
chr1	138036731	138037129	1.0236	0.0581231	0.107589	0.0670184	0.0388374	0.0170891	0.629941	3.05689	0.0689833	0.0883373	0.0420557	0.383167	2.39378	0.0512204	0.0341067	0.0358428	0.675051	2.24344	0.0469912	0.0806868	0.0317823	0.350637	1.90489	0.04969	0.040384	0.0284962	1	0	0	0	0	0	0	0	0	1	0	0	0	0	0	0	0	0	0.324121	0.675879	0
chr1	138075802	138077133	0.221521	0.0227998	0.215006	0.980101	0.133331	0.0320429	0.553849	0.12697	0.0825032	0.105175	0.0307078	0.829663	0.164282	0.0517296	0.0467685	0.0143199	0.843198	0.0740301	0.0762835	0.0588935	0.0204978	0.254441	0.0501131	0.0875166	0.0806028	0.0131655	0	0	1	1	1	0	0	0	1	0	0	0	0	0	0	0	0	1	0	0	0
chr1	138080472	138081011	0.179104	0.0664542	0.202698	0.287718	0.152056	0.0339095	0.269959	0.095208	0.0574289	0.590123	0.0656473	1.1757	0.201453	0.0790574	0.300055	0.089905	0.983486	0.0970734	0.0912238	0.122752	0.0377483	0.121615	0.0684044	0.0603042	0.339071	0.079032	0	0	0	1	0	0	0	0	0	0	0	0	0	1	0	0	0	0.608534	0	0	0
chr1	138151580	138152152	0.257777	0.125241	0.195118	0.391459	0.0610442	0.02968	1.2527	0.55974	0.0551939	0.24978	0.0226474	1.67393	0.300023	0.0687835	0.0925915	0.0388161	0.194057	0.0435757	0.0259423	0.351879	0.0468363	0.442102	0.115101	0.0317084	0.326	0.0292154	0	0	0	1	0	0	0	0	0.034965	0.965035	0	0	0	0	0	0	0	1	0	0	0
chr1	138243096	138245412	0.0530947	0.00773292	0.157588	0.196859	0.159612	0.0317713	0.537949	0.217584	0.0289261	0.112651	0.0295198	0.70151	0.242778	0.0753542	0.0869938	0.0317798	1.16007	0.503731	0.156918	0.0782366	0.0330902	0.105501	0.0583844	0.034383	0.549101	0.0598923	0	0	0	1	1	0	0	0	0.604491	0.217617	0	0	0.177893	0	0	0	0	0.782383	0.217617	0	0
chr1	138311895	138312293	0.465122	0.112496	0.0303862	0.0467985	0.0261457	0.0164021	0.0629243	2.62569	0.0304481	0.0111917	0.0252413	0.083106	1.94664	0.0286775	0.0153264	0.0271837	0.194929	2.10488	0.0450087	0.0272145	0.0305455	0.0484546	1.80027	0.0329115	0.0226531	0.0167535	1	0	0	0	0	0	0	0	0	0	1	0	0	0	0	0	0	0	0	1	0
chr1	138323578	138324926	0.0837601	0.0597867	0.135061	0.0673596	0.178278	0.0269543	0.796821	0.187283	0.155231	0.00507088	0.0145397	0.77626	0.170538	0.165476	0.0371747	0.0170335	1.23568	0.269819	0.320747	0.0537357	0.0316075	0.239367	0.0528971	0.0824361	0.0750017	0.0371419	0	0	0	0	1	0	0	0.313056	0.686944	0	0	0	0	0	0	0	0.313056	0.686944	0	0	0
chr1	138326959	138327577	0.204541	0.0289797	0.306776	0.481402	0.0692587	0.0379424	1.25738	0.153714	0.288331	0.0827288	0.0358511	1.37801	0.223641	0.269051	0.0678418	0.0423624	0.843573	0.0572497	0.550105	0.0766905	0.0386031	0.236595	0.0977562	0.107781	0.162124	0.0365788	0	0	0	1	0	0	0	0.647249	0.352751	0	0	0	0	0	0	0	0.647249	0.352751	0	0	0
chr1	138341192	138342743	0.092353	0.0346411	0.112921	0.162707	0.148944	0.0324913	0.521739	0.0861861	0.0663057	0.243894	0.0426785	1.13391	0.207416	0.115798	0.0663808	0.0639483	1.41001	0.349597	0.190608	0.0575232	0.0348184	0.11162	0.047189	0.0341726	0.214369	0.0584919	0	0	0	1	1	0	0	0	0.994842	0	0	0	0.005158	0	0	0	0	1	0	0	0
chr1	138428877	138429733	0.0839377	0	0.0999844	0.131501	0.212911	0.0259634	0.373936	0.083137	0.229036	0.0155454	0.053593	0.472543	0.125936	0.43007	0.0527476	0.0781975	0.835111	0.133211	0.380989	0.0484022	0.0652719	0.20438	0.0541743	0.133859	0.0522649	0.0483446	0	0	0	0	1	0	0.389019	0.610981	0	0	0	0	0	0	0	0.155374	0.844626	0	0	0	0
chr1	138560919	138561339	0.130871	0	0.054788	0.0641107	0.0815531	0.0583377	0.0570645	0.0565143	0.0473894	0.168954	0.019005	0.0475784	0.0734741	0.0391724	0.167105	0.0349082	0.0542833	0.018338	0.0309519	0.0375501	0.00735178	0.0539051	0.0169096	0.0399051	0.0553799	0.0274771	0	0	0	0	0	1	0	0	0	0	0	0	1	0	0	0	0	0	0	0	0
chr1	138581733	138582131	1.11877	0.0449987	0.139282	0.0863482	0.0666648	0.0640002	0.308694	0.170199	0.0366992	0.133526	0.0296413	0.472578	0.243705	0.0589324	0.0927829	0.0307616	0.352811	0.880782	0.0609368	0.0687266	0.0347806	0.281534	0.919184	0.04704	0.0704071	0.0320774	1	0	0	0	0	0	0	0	0.831658	0	0	0	0.168342	0	0	0	0	0	0.831658	0	0
chr1	139382787	139383210	0.114898	0	0.0269733	0.0228539	0.0721873	0.0607222	0.0362096	0.0833016	0.00553857	0.0642412	0.11993	0.0149448	0.0540576	0.0158318	0.052771	0.0998385	0.0332898	0.0181829	0.0097124	0.0634301	0.0221458	0.0243378	0.0181119	0.0191069	0.0459677	0.0448871	0	0	0	0	0	1	0	0	0	0	0	0	1	0	0	0	0	0	0	0	0
chr1	139456783	139457696	0.791868	0.04904	0.0861899	0.102336	0.0669781	0.0787974	0.112239	0.106031	0.0231172	0.0927577	0.427203	0.0645031	0.148473	0.0463081	0.0935538	0.36667	0.077147	0.0363464	0.0253481	0.082407	0.0769034	0.403791	0.131828	0.0307888	0.123367	0.0884323	1	0	0	0	0	1	0	0	0	0	0	1	0	0	0	0	0	0	0	0	0.894852
chr1	139703341	139703739	2.24347	0.0224993	0.107727	0.160234	0.0445217	0.0447835	0.116395	0.118825	0.0134008	0.0408253	0.282447	0.0726357	0.132019	0.0527979	0.0746698	0.288203	0.144022	0.0659982	0.0252662	0.0854431	0.0319572	0.444134	0.566925	0.0507884	0.0836372	0.02969	1	0	0	0	0	0	0	0	0	0	0	1	0	0	0	0	0	0	0	0	0
chr1	139795001	139795399	0.70226	0.0899972	0.179018	0.0727413	0.0570562	0.0397991	0.147826	0.105794	0.0256295	0.136553	0.49742	0.098652	0.208246	0.0351761	0.0783985	0.371004	0.464853	1.56489	0.0116213	0.0579143	0.0447625	0.136023	1.69804	0.0433054	0.0380045	0.0213757	1	0	0	0	0	0	0	0	0	0	0	1	0	0	0	0	0	0	0	0	1
chr1	140624048	140624676	0.114412	0.0142591	0.0965492	0.148859	0.0964218	0.0633521	0.146665	0.0881641	0.0185127	0.0806978	0.0281097	0.11338	0.0595215	0.0281804	0.147963	0.0358513	0.0647241	0.0246215	0.0240622	0.0676555	0.0469432	0.0673534	0.0484608	0.0290636	0.0532125	0.0608735	0	0	0	0	0	1	0	0	0	0	0	0	1	0	0	0	0	0	0	0	0
chr1	140682614	140683012	0.635593	0	0.109102	0.0990654	0.0473919	0.0254242	0.147736	0.085958	0.0260593	0.489058	0.0153019	0.25709	0.150868	0.0233114	0.272226	0.070013	0.120426	0.0421285	0.0225044	0.0993172	0.0792433	0.177801	0.121397	0.0570631	0.0983495	0.0886118	1	0	0	0	0	0	0	0	0	0	0	0	0	1	0	0	0	0	0	0	0
chr1	140963824	140964222	0.572148	0	0.1531	0.0888916	0.062763	0.0467016	0.266744	0.0752025	0.248169	0.00654609	0.0317431	0.553522	0.128999	0.185601	0.0867189	0.0275649	0.109365	0.0376371	0.107203	0.0445464	0.0339435	0.464433	0.110131	0.0965377	0.0685439	0.0259006	1	0	0	0	0	0	0	0	0	0	0	0	1	0	0	0	0	1	0	0	0
chr1	141012813	141013154	0.0827773	0	0.0509516	0.0592224	0.0984053	0.0634738	0.0444912	0.0587074	0.11511	0.0199634	0.01277	0.0225193	0.0364216	0.156372	0.0179571	0.0265632	0.0282737	0.00354663	0.0647236	0.0266744	0.0303875	0.0342667	0.0235702	0.13854	0.0370727	0.0363539	0	0	0	0	0	1	0	0	0	0	0	0	1	0	0	0	0	0	0	0	0
chr1	141318743	141319141	0.429274	0.309366	0.0480543	0	0.0252039	0.0126576	0.130378	3.08749	0.0449949	0.0218907	0.0277752	0.0769386	2.30628	0.0405018	0.0275719	0.0193928	0.148324	2.40738	0.0514757	0.0408012	0.034918	0.0558411	2.01088	0.0337079	0.0305668	0.0202375	1	0	0	0	0	0	0	0	0	0	1	0	0	0	0	0	0	0	0	1	0
chr1	141362311	141363158	0.129063	0	0.474414	0.260418	0.0587626	0.0291089	0.537432	0.656547	0.314401	0.023814	0.0163189	0.470333	0.230745	0.646838	0.045553	0.0287801	0.335315	0.0793843	0.982036	0.0555707	0.028671	0.232565	0.0947278	0.300531	0.0260108	0.0156534	0	0	1	1	0	0	0	0	0.186541	0.577332	0.236128	0	0	0	0	0.186541	0.813459	0	0	0	0
chr1	143525252	143525673	0.0223086	0	0.0883883	0.0159895	0.0699548	0.0636081	0.0186506	0.0673597	0.0168054	0.0270164	0.102877	0.0234516	0.076892	0.0127843	0.024062	0.0477346	0.0351648	0.0159131	0.0168157	0.0386109	0.0302467	0.0223281	0.0367281	0.0161214	0.024642	0.0410062	0	0	0	0	0	1	0	0	0	0	0	0	1	0	0	0	0	0	0	0	0
chr1	143544188	143544587	0.0510648	0	0.0482081	0.120635	0.116824	0.0620852	0.078261	0.0744573	0.0213434	0.0689479	0.112233	0.0220743	0.0387835	0.0183307	0.0567673	0.0783058	0.0411492	0.0187581	0.0224343	0.0359541	0.0954195	0.0310475	0.0353455	0.0128331	0.0488005	0.0569329	0	0	0	0	0	1	0	0	0	0	0	0	1	0	0	0	0	0	0	0	0
chr1	143749180	143750137	0.0536279	0	0.320991	0.0572773	0.0495463	0.0305672	0.176345	0.122405	0.0103989	0.114927	0.167534	0.16049	0.143384	0.037299	0.0821358	0.149187	0.0847247	0.0441533	0.0471143	0.0810682	0.180975	0.0653184	0.0835372	0.0412448	0.0655344	0.179493	0	0	1	0	0	0	0	0	0	0	0	0.208986	0.791014	0	0	0	0	0.417973	0	0	0
chr1	143883820	143884218	0.527919	0	0.0985838	0.0455267	0.0529416	0.0334241	0.132749	0.129602	0.0268147	0.0696844	0.373689	0.0744996	0.139317	0.0486992	0.0850904	0.276199	0.0679899	0.0255224	0.017473	0.0605528	0.11691	0.0553324	0.0606322	0.042715	0.0713315	0.193658	1	0	0	0	0	0	0	0	0	0	0	0.954774	0.045226	0	0	0	0	0	0	0	0
chr1	145216090	145216488	0.798715	0	0.104702	0.0881288	0.0731565	0.0488547	0.130286	0.121659	0.016331	0.099881	0.039345	0.377951	0.192694	0.0405018	0.138684	0.121247	0.0757595	0.0272949	0.0163246	0.0742897	0.145756	0.558986	0.159509	0.0734161	0.0607662	0.104532	1	0	0	0	0	0	0	0	0	0	0	0	1	0	0	0	0	0.778894	0	0	0
chr1	145571430	145572536	0.139395	0.0485789	1.2442	0.286429	0.064634	0.0309107	0.914069	0.322882	0.0639841	0.0185666	0.0203365	1.06771	0.220812	0.111009	0.0325975	0.0582057	0.512719	0.0392985	0.0491459	0.0535654	0.0292624	0.108371	0.0406601	0.0483124	0.104183	0.0472867	0	0	1	1	0	0	0	0	0.457505	0.542495	0	0	0	0	0	0	0	0.638336	0.361664	0	0
chr1	145574669	145575432	0.0403581	0	0.265438	0.216849	0.0551848	0.0299583	0.892274	0.202073	0.0529532	0.00892206	0.0332902	1.01179	0.20469	0.0508546	0.0456135	0.0331413	0.266668	0.0452715	0.0169736	0.0783155	0.0253042	0.198558	0.0372133	0.0326233	0.0929286	0.0383085	0	0	1	1	0	0	0	0	0.475754	0.524246	0	0	0	0	0	0	0	1	0	0	0
chr1	145620877	145621514	0.149616	0	0.10369	0.339755	0.0637608	0.0882134	0.505629	0.136306	0.10735	0.0490803	0.0140404	0.660278	0.188148	0.0648898	0.0274774	0.0135453	0.332214	0.0354736	0.0348359	0.49028	0.0502533	0.235274	0.49875	0.0898708	0.0356733	0.0161221	0	0	0	1	0	1	0	0	1	0	0	0	0	0	0	0	0	1	0	0	0
chr1	145624615	145625013	0.597553	0.0899972	0.122233	0.0743943	0.070331	0.0349404	0.246164	4.02733	0.143528	0.0754562	0.0336289	0.211343	3.7924	0.15021	0.0584602	0.0434855	0.278745	2.53244	0.0887871	0.100602	0.0868389	0.114586	2.26279	0.0796906	0.0556537	0.029926	1	0	0	0	0	0	0	0	0	0	1	0	0	0	0	0	0	0	0	1	0
chr1	145763691	145764089	0.858936	0.034999	0.105596	0.103262	0.0713511	0.040955	0.611642	0.186364	0.0364257	0.178293	0.045454	0.781363	0.134813	0.0464071	0.123495	0.0382986	0.107371	0.0524707	0.0131936	0.0903366	0.0661629	0.478163	0.343755	0.0761348	0.0724874	0.0279827	1	0	0	0	0	0	0	0	1	0	0	0	0	0	0	0	0	1	0	0	0
chr1	145851043	145851441	1.31787	0.0687479	0.0927402	0.025434	0.0517533	0.0349237	0.268689	0.22769	0.133461	0.391007	0.458213	0.274461	0.232204	0.210261	0.114546	0.512511	0.685698	1.29278	0.0231743	0.303678	0.0678246	0.207762	1.81098	0.0367835	0.0675243	0.0355752	1	0	0	0	0	0	0	0	0	0	0	1	0	0	0	0.103015	0.502513	0.394472	0	0	0
chr1	146024113	146024911	0.115571	0	0.31788	0.0594932	0.0420783	0.0266347	0.330146	0.192782	0.0150625	0.0617863	0.0166155	0.388545	0.133182	0.0282829	0.0402461	0.0125863	0.0677513	0.0181532	0.0142039	0.0465618	0.0314533	0.0477258	0.00790291	0.0244335	0.0567009	0.0157146	0	0	1	0	0	0	0	0	0.890977	0	0	0	0.109023	0	0	0	0	0.890977	0	0	0
chr1	146031898	146032722	0.47884	0	0.531523	0.0818786	0.0629482	0.0325231	0.621059	0.152708	0.0367542	0.0825475	0.0218599	0.759736	0.19311	0.0449865	0.0734879	0.0396354	0.127823	0.0337961	0.0104208	0.0862701	0.0310462	0.389072	0.0934338	0.0390882	0.0742733	0.0293113	1	0	1	0	0	0	0	0	1	0	0	0	0	0	0	0	0	1	0	0	0
chr1	146046652	146047236	1.43201	0	0.0751971	0.0576337	0.0479006	0.0796572	0.0949233	0.0691589	0.016588	0.0889844	0.0235876	0.258603	0.0522921	0.0235042	0.0904484	0.0172995	0.0470147	0.0167942	0.0140883	0.0387146	0.0242311	0.35489	0.0940851	0.0595217	0.0149378	0.00853248	1	0	0	0	0	1	0	0	0	0	0	0	1	0	0	0	0	1	0	0	0
chr1	146047681	146048079	0.820378	0	0.184105	0.0962675	0.0580094	0.0460734	0.33356	0.0858939	0.00842598	0.0606747	0.0122769	0.332898	0.0915276	0.0215587	0.0657801	0.0144387	0.0440246	0.0190051	0.00984398	0.0575183	0.0283592	0.228383	0.0910028	0.0426463	0.0101028	0.0186551	1	0	0	0	0	0	0	0	0.801508	0	0	0	0.198492	0	0	0	0	0.801508	0	0	0
chr1	146095979	146096377	0.628762	0.0449987	0.28049	0.0771923	0.0374135	0.0405446	0.279846	0.67796	0.0497093	0.0389951	0.0355735	0.4956	0.315024	0.0620066	0.0329293	0.0356945	0.0763877	0.0356247	0.0184711	0.0622474	0.0420515	0.316192	0.81017	0.0626513	0.0283912	0.0199321	1	0	0	0	0	0	0	0	0	0	1	0	0	0	0	0	0	1	0	0	0
chr1	146165127	146166162	0.971896	0.0086519	1.23523	0.0748691	0.0524391	0.0333951	0.577254	0.119545	0.0306436	0.0255243	0.0832625	0.440207	0.11812	0.0615983	0.0620531	0.0776505	0.194865	0.0186653	0.0166821	0.0492926	0.038154	0.534711	0.0857946	0.0730735	0.032073	0.0313207	1	0	1	0	0	0	0	0	1	0	0	0	0	0	0	0	0	0.736232	0	0	0
chr1	146177475	146177873	1.19472	0.0449987	0.0905403	0.211356	0.0701851	0.0542242	0.321673	0.101243	0.0458805	0.115859	0.0722471	0.297483	0.165514	0.0549282	0.138938	0.0358428	0.0678665	0.0393164	0.024186	0.0568622	0.0586171	0.453541	0.316086	0.0495664	0.0336397	0.0177251	1	0	0	0	0	0	0	0	0.68593	0	0	0	0.31407	0	0	0	0	0.68593	0	0	0
chr1	146622160	146623082	1.43629	0.0388491	0.900226	0.494388	0.0332734	0.124094	0.101774	0.169755	0.00527314	0.0145845	0.0491885	0.25082	0.171737	0.0296589	0.0226942	0.0165507	0.186728	0.0416987	0.0154865	0.0264928	0.0241331	0.0689182	0.774712	0.0357159	0.00942653	0.00877185	1	0	1	1	0	1	0	0	0.043384	0	0.433839	0	0.522777	0	0	0	0	0.566161	0.433839	0	0
chr1	146700337	146701010	0.0979163	0	0.0756199	0.0685125	0.030228	0.0819094	0.0247183	0.0637202	0.00704699	0.0356322	0.084708	0.270116	0.0842203	0.0377938	0.0587579	0.0456237	0.0434945	0.0269318	0.0186208	0.0468274	0.0583814	0.244253	0.0657526	0.107799	0.0168383	0.0365363	0	0	0	0	0	1	0	0	0	0	0	0	1	0	0	0	0	0.594354	0	0	0
chr1	146985918	146986316	0.689106	0.0224993	0.033755	0.116488	0.0420327	0.114111	0.0697638	0.058393	0.0170733	0.0339976	0.080104	0.319157	0.100738	0.0431443	0.0545158	0.0668373	0.206536	0.030307	0.0133167	0.0405278	0.0312326	0.335302	0.171236	0.0453238	0.0247743	0.0275663	1	0	0	0	0	0	0	0	0	0	0	0	1	0	0	0	0	1	0	0	0
chr1	147302683	147303081	0.98389	0	0.0918463	0.134418	0.0358102	0.0664127	0.113841	0.0846699	0.00955898	0.0337863	0.0886881	0.342416	0.13524	0.0635167	0.0500219	0.09165	0.0535423	0.0231767	0.00855875	0.0395847	0.0490476	0.416822	0.0976048	0.114195	0.0420429	0.0676386	1	0	0	0	0	0	0	0	0	0	0	0	1	0	0	0	0	0	0	0	0
chr1	147804664	147805521	0.107255	0	0.44902	0.120598	0.0806384	0.0490031	0.485154	0.19276	0.0420644	0.112941	0.243149	0.403062	0.242849	0.157138	0.0807564	0.144522	0.081116	0.0546468	0.0593234	0.108886	0.2405	0.076246	0.0812508	0.0602643	0.0957882	0.231011	0	0	1	0	0	0	0	0	0.841307	0	0	0	0.158693	0	0	0	0	0.466744	0	0	0
chr1	147814913	147815766	0.0970484	0	0.816128	0.023675	0.0267997	0.0200707	0.122147	0.0314125	0.00681172	0.0157643	0.0207958	0.104495	0.057395	0.0227351	0.0216549	0.0374977	0.0353421	0.0112057	0.00777631	0.0233615	0.0304162	0.0246126	0.00643809	0.00543263	0.0330921	0.0272461	0	0	1	0	0	0	0	0	0.234467	0	0	0	0.765533	0	0	0	0	0	0	0	0
chr1	147848968	147849732	0.0752366	0	0.303947	0.0564432	0.0454637	0.0286186	0.242302	0.0710942	0.0135686	0.0576057	0.088269	0.290429	0.119772	0.0533096	0.0495715	0.0328773	0.0416217	0.0218285	0.0261677	0.0333032	0.0841892	0.0381315	0.0210341	0.0317723	0.0413176	0.107125	0	0	1	0	0	0	0	0	1	0	0	0	0	0	0	0	0	0.52356	0	0	0
chr1	150976888	150977286	0.50226	0	0.0296989	0.0450181	0.0365053	0.0249634	0.0877292	0.0595738	0.00240928	0.0257621	0.110433	0.0622648	0.0974919	0.0142107	0.0561054	0.124169	0.0375656	0.0174059	0.0054962	0.0165119	0.06239	0.0581828	0.0272693	0.0197304	0.0161672	0.0392812	1	0	0	0	0	0	0	0	0	0	0	0	1	0	0	0	0	0	0	0	0
chr1	151175676	151176094	0.194238	0	0.109053	0.27232	0.058415	0.0366344	0.0823449	0.0824175	0.0129704	0.0526779	0.189707	0.0652331	0.105	0.0282554	0.0862511	0.185515	0.0324007	0.0203546	0.0213885	0.0494039	0.0857052	0.0300312	0.0652979	0.0109163	0.0651091	0.0607282	0	0	0	1	0	0	0	0	0	0	0	0	1	0	0	0	0	0	0	0	0
chr1	151559479	151559860	0.0278836	0	0.0412216	0.0883414	0.0864344	0.064633	0.0256894	0.0270008	0.0106249	0.0106617	0.0965029	0.0163022	0.0615941	0.00609844	0.0470674	0.102949	0.0207977	0.0212036	0.0128254	0.0492042	0.0192886	0.0315497	0.0208172	0.016896	0.0355953	0.0274768	0	0	0	0	0	1	0	0	0	0	0	0	1	0	0	0	0	0	0	0	0
chr1	151784947	151785345	1.06345	0	0.0687472	0.100464	0.0557894	0.0772694	0.0582733	0.0790453	0.0149115	0.0712328	0.1651	0.092287	0.0751447	0.0328975	0.0429965	0.151035	0.312078	0.041822	0.0509425	0.0403228	0.0319821	0.382204	0.239233	0.133445	0.0261748	0.0108128	1	0	0	0	0	0	0	0	0	0	0	0	1	0	0	0	0	0	0	0	0
chr1	151786585	151787355	0.681115	0	0.0722057	0.0895268	0.0464423	0.11134	0.0451572	0.0845883	0.00934325	0.0589397	0.206444	0.0729666	0.100953	0.0234714	0.0741583	0.195223	0.26658	0.0251717	0.061913	0.0390985	0.0282319	0.290591	0.408242	0.0892658	0.0175003	0.0137391	1	0	0	0	0	1	0	0	0	0	0	0	1	0	0	0	0	0	0	0	0
chr1	151787384	151788047	0.868836	0.0135064	0.0723447	0.0735157	0.0367615	0.0776685	0.0485399	0.0824915	0.0142832	0.0548883	0.154979	0.0560784	0.0622258	0.018235	0.0560275	0.13098	0.194251	0.0179693	0.0469792	0.0392627	0.0237362	0.294922	0.243445	0.089627	0.0128314	0.00674922	1	0	0	0	0	1	0	0	0	0	0	0	1	0	0	0	0	0	0	0	0
chr1	151921764	151922162	0.486785	0	0.0963836	0.114834	0.0411245	0.0265634	0.0426791	0.0797751	0.0113171	0.0279441	0.151428	0.0545709	0.0879289	0.0258866	0.0674285	0.174239	0.0385761	0.00915605	0.0215473	0.0354704	0.0326318	0.242287	0.02544	0.0589577	0.0271403	0.0243877	1	0	0	0	0	0	0	0	0	0	0	0	1	0	0	0	0	0	0	0	0
chr1	152092038	152092436	2.29041	0	0.0956963	0.110002	0.0593659	0.0503373	0.112716	0.0837468	0.00755344	0.0297741	0.134123	0.0661117	0.117549	0.0265338	0.0727662	0.230533	0.0807573	0.0276948	0.0160921	0.069943	0.0952091	0.321599	0.082244	0.0311266	0.080809	0.052176	1	0	0	0	0	0	0	0	0	0	0	0	1	0	0	0	0	0	0	0	0
chr1	152239693	152240091	0.582079	0.0599981	0.0946651	0.0306479	0.0626399	0.0277111	0.151353	3.17319	0.0465968	0.046034	0.034061	0.0717235	2.16853	0.0611974	0.0249226	0.0312486	0.157199	2.50621	0.0311452	0.0460637	0.0496848	0.0804364	2.2116	0.0471774	0.0251279	0.0203624	1	0	0	0	0	0	0	0	0	0	1	0	0	0	0	0	0	0	0	1	0
chr1	152240339	152240737	0.840106	0.179994	0.0913653	0.0334456	0.0409788	0.0215875	0.0577869	2.70178	0.0577705	0.0496238	0.0314682	0.0437043	1.6019	0.0578136	0.00441543	0.0296396	0.115332	2.32602	0.054456	0.0329553	0.0319946	0.0409342	1.64587	0.0467929	0.0236729	0.0207788	1	0	0	0	0	0	0	0	0	0	1	0	0	0	0	0	0	0	0	1	0
chr1	152716242	152716875	0.0680238	0.0424394	0.228833	0.0682043	0.0318068	0.0219583	0.384972	0.0962008	0.0409334	0.0019473	0.0346064	0.255541	0.100429	0.0337224	0.0517238	0.0224297	0.0756491	0.0296308	0.00943026	0.0345489	0.0247511	0.0290356	0.0256918	0.0377778	0.0355823	0.0656117	0	0	1	0	0	0	0	0	1	0	0	0	0	0	0	0	0	0.565561	0	0	0
chr1	152926985	152927882	0.10047	0.0798637	0.742573	0.219664	0.0830369	0.0263564	0.932675	0.381425	0.0664804	0.060339	0.0363965	1.03114	0.276237	0.114973	0.0244238	0.0354235	0.998432	0.371821	0.0562593	0.0470449	0.0315573	0.132185	0.0508272	0.0267567	0.130129	0.030658	0	0	1	1	0	0	0	0	0	1	0	0	0	0	0	0	0	1	0	0	0
chr1	152942561	152944004	0.210801	0.291665	1.23289	0.293931	0.165905	0.0248147	0.400986	0.248814	0.0171229	0.00599894	0.00949745	0.509408	0.169299	0.0412366	0.0324432	0.0141603	0.54186	0.180117	0.0219735	0.0325618	0.0142482	0.248994	0.178893	0.0241952	0.062953	0.00989253	0	1	1	1	1	0	0	0	0.418572	0.442827	0.1386	0	0	0	0	0	0	1	0	0	0
chr1	152948016	152949421	0.255113	0.0127469	1.19685	0.305483	0.119817	0.0289575	1.06343	0.211296	0.103277	0.0647623	0.238978	1.23814	0.158972	0.166593	0.0449724	0.101035	0.576143	0.0458027	0.18373	0.0842936	0.148675	0.108105	0.0387607	0.062624	0.0814996	0.0984789	1	0	1	1	1	0	0	0	0.857651	0.142349	0	0	0	0	0	0	0	1	0	0	0
chr1	153003252	153003650	0.536172	0	0.147257	0.0609144	0.0703533	0.0221739	0.998246	0.104249	0.0893259	0.160344	0.0533308	1.24557	0.153888	0.120292	0.104224	0.0762373	0.163577	0.0370241	0.0402508	0.146119	0.028709	0.111214	0.0379541	0.058285	0.102442	0.0664033	1	0	0	0	0	0	0	0	1	0	0	0	0	0	0	0	0	1	0	0	0
chr1	153015410	153015962	0.084979	0.0486669	0.229251	0.313492	0.0722208	0.031015	0.74822	0.140036	0.100425	0.126826	0.0370927	1.54359	0.204819	0.0841074	0.063219	0.0255379	0.232062	0.0591073	0.0632381	0.140951	0.0495241	0.183231	0.0550976	0.0598244	0.155793	0.0344472	0	0	0	1	0	0	0	0	1	0	0	0	0	0	0	0	0	1	0	0	0
chr1	153023791	153025031	0.225155	0.317748	1.28056	0.337438	0.0759374	0.0230506	0.694052	0.539564	0.0286414	0.0137135	0.0309816	0.597475	0.480757	0.0370173	0.040885	0.0206575	0.687578	0.437612	0.0328817	0.0481454	0.0206107	0.282447	0.327527	0.0283766	0.0488322	0.0194288	1	1	1	1	0	0	0	0	0.491129	0.508871	0	0	0	0	0	0	0	0.168548	0.831452	0	0
chr1	153027079	153027908	0.157557	0	0.346029	0.0924963	0.0631981	0.0286953	1.10144	0.140717	0.0620798	0.0364628	0.0410984	0.972725	0.175901	0.162264	0.0487278	0.0703667	0.867589	0.0550722	0.0737266	0.0576695	0.0403956	0.0895564	0.0355185	0.0551281	0.119371	0.0597686	0	0	1	0	0	0	0	0	1	0	0	0	0	0	0	0	0	1	0	0	0
chr1	153031027	153031939	0.0467638	0.0420026	0.424192	0.106388	0.050577	0.0271549	0.738603	0.175176	0.0665006	0.177763	0.0830138	0.637829	0.188007	0.0830331	0.0958227	0.0574306	0.310332	0.0363571	0.0392601	0.0643038	0.0344294	0.0676011	0.0181176	0.0546887	0.0625017	0.0472478	0	0	1	0	0	0	0	0	1	0	0	0	0	0	0	0	0	1	0	0	0
chr1	153033922	153034970	0.0975021	0.0256336	0.284474	0.196562	0.0370223	0.019228	0.853427	0.175182	0.0937627	0.0848988	0.11659	0.859109	0.236502	0.190777	0.123677	0.238801	0.419387	0.027271	0.0411229	0.0465165	0.0284622	0.10822	0.0223362	0.0366779	0.0424624	0.0474789	0	0	1	0	0	0	0	0	1	0	0	0	0	0	0	0	0	1	0	0	0
chr1	153040849	153041716	0.011839	0.0094677	0.420583	0.169821	0.051818	0.0243343	0.78234	0.190319	0.0815386	0.177522	0.0847619	0.651563	0.221148	0.11754	0.103409	0.104029	0.394966	0.0342919	0.0550867	0.0753968	0.0493438	0.0903798	0.0402903	0.0467742	0.101044	0.0888549	0	0	1	0	0	0	0	0	1	0	0	0	0	0	0	0	0	1	0	0	0
chr1	153097915	153098313	1.37448	0.00999969	0.396877	0.158835	0.0667434	0.0472797	0.610547	0.147378	0.0710022	0.430776	0.0765096	0.608609	0.261522	0.0918839	0.170887	0.0590675	0.251216	0.098931	0.0254575	0.213519	0.074196	0.303668	0.298981	0.0385822	0.14643	0.0521066	1	0	0	0	0	0	0	0	1	0	0	0	0	0	0	0	0	1	0	0	0
chr1	153113552	153114540	0.158278	0	0.54745	0.0834511	0.0701088	0.0294428	0.99739	0.161676	0.0593763	0.113873	0.0409333	0.949979	0.15915	0.105741	0.0810212	0.0786153	0.101793	0.0347362	0.0372094	0.0828194	0.0409151	0.0979084	0.0602151	0.0385513	0.0958499	0.0696749	0	0	1	0	0	0	0	0	1	0	0	0	0	0	0	0	0	1	0	0	0
chr1	153134650	153135048	0.553708	0.0674979	0.0958337	0.101863	0.0798722	0.0401675	1.63253	0.7309	0.0974003	0.390794	0.0539201	1.94127	0.577779	0.0912233	0.137899	0.0326883	0.209376	0.0782996	0.0364773	0.168659	0.056031	0.70051	0.712853	0.0617726	0.0760635	0.025859	1	0	0	0	0	0	0	0	0.120603	0.879397	0	0	0	0	0	0	0	0.120603	0.879397	0	0
chr1	153174270	153174942	0	0	0.313803	0.0669577	0.0543508	0.0268063	0.223534	0.0684813	0.0456616	0.0869201	0.0869979	0.111535	0.0927518	0.0573339	0.0851123	0.184108	0.150565	0.192158	0.0926598	0.100935	0.161301	0.0677305	0.0938971	0.107846	0.103564	0.128351	0	0	1	0	0	0	0	0	1	0	0	0	0	0	0	0	0	0	0	0	0
chr1	153191505	153191903	1.37138	0.196869	0.0372611	0.0268328	0.0354962	0.0189487	0.180595	3.14234	0.0509335	0.0420218	0.0508165	0.212354	2.08014	0.0396793	0.0152283	0.0212982	0.562964	2.29347	0.0281373	0.0403364	0.0294585	0.0790847	2.00688	0.0283806	0.0130806	0.0180305	1	0	0	0	0	0	0	0	0	0	1	0	0	0	0	0	0	0	0.761307	0.238693	0
chr1	153193826	153194350	0.12566	0.0854457	0.239151	0.273835	0.0884875	0.0288675	0.683956	0.740417	0.296432	0.00951639	0.0215142	0.539107	0.344881	0.259323	0.0457594	0.0231879	0.747752	1.25797	0.130192	0.0374063	0.0271479	0.363469	0.8176	0.0513512	0.0239913	0.0115337	0	0	0	1	0	0	0	0	0	1	0	0	0	0	0	0	0	0	1	0	0
chr1	153274061	153274683	0.0910099	0.0143967	0.374395	0.142971	0.0760735	0.0167881	0.535445	0.540226	0.0577902	0.00108095	0.0243462	0.305231	0.51413	0.12153	0.0391274	0.0413584	0.498953	0.933221	0.0638372	0.0273233	0.0134778	0.210714	0.565108	0.0646535	0.0118588	0.0121412	0	0	1	0	0	0	0	0	0.223473	0.643087	0.133441	0	0	0	0	0	0	0.223473	0.643087	0.133441	0
chr1	153275558	153275956	1.26874	0.323114	0.0502542	0.0523941	0.0591754	0.0348984	0.122626	2.8937	0.0643993	0.0285073	0.0605005	0.0833239	2.20223	0.0582987	0.0368934	0.0341279	0.10815	2.51592	0.0538409	0.0503967	0.0534827	0.054958	1.98982	0.0282432	0.02215	0.00557988	1	0	0	0	0	0	0	0	0	0	1	0	0	0	0	0	0	0	0	1	0
chr1	153347709	153348107	0.551779	0.0224993	0.0688162	0.0169136	0.0138465	0.00956653	0.0874251	3.33304	0.0467922	0.0361796	0.021843	0.0903234	2.46652	0.0491306	0.0161899	0.0201761	0.106416	2.39014	0.031569	0.0965286	0.0246362	0.0159776	1.947	0.0177533	0.038494	0.0154765	1	0	0	0	0	0	0	0	0	0	1	0	0	0	0	0	0	0	0	1	0
chr1	153572726	153573124	0.730112	0	0.0743158	0.0746484	0.0537377	0.0208671	0.409859	0.124106	0.0248482	0.151968	0.0305056	0.687015	0.157889	0.0404748	0.0572632	0.0446499	0.101623	0.0167128	0.0245142	0.0562877	0.0122556	0.47914	0.0814808	0.0529029	0.0864654	0.0727608	1	0	0	0	0	0	0	0	1	0	0	0	0	0	0	0	0	1	0	0	0
chr1	153588094	153588886	0.182219	0.0678387	0.279486	0.102697	0.12207	0.0228331	0.483786	0.114128	0.0239396	0.232959	0.0378261	0.535252	0.180287	0.0320948	0.0604123	0.0341619	0.463858	0.110314	0.0288428	0.0753174	0.0134162	0.128352	0.0394242	0.0266471	0.0731882	0.0340878	0	0	1	0	0	0	0	0	1	0	0	0	0	0	0	0	0	1	0	0	0
chr1	153600603	153601765	0.466492	0.0154126	0.427752	0.130367	0.0612119	0.0249795	0.748107	0.42289	0.0261346	0.0115723	0.0242208	0.658269	0.320743	0.0399454	0.0276255	0.0264821	0.705497	0.451092	0.0408207	0.0507452	0.0119727	0.331775	0.46649	0.0211062	0.0294199	0.0231053	1	0	1	0	0	0	0	0	0.169535	0.830465	0	0	0	0	0	0	0	0.169535	0.830465	0	0
chr1	153602318	153602716	0.663189	0.269992	0.012787	0.0320468	0.0509238	0.023087	0.0983381	3.62333	0.0469614	0.0572255	0.0532326	0.0786639	2.78743	0.0380614	0.00969435	0.033281	0.120999	2.45004	0.0488506	0.0508614	0.032232	0.0361168	1.90896	0.0274469	0.023401	0.0203624	1	0	0	0	0	0	0	0	0	0	1	0	0	0	0	0	0	0	0	1	0
chr1	153800549	153801297	0.328653	0.239431	0.0852667	0.221536	0.0541973	0.0777481	0.0714101	0.0705588	0.0112603	0.0818713	0.314117	0.140392	0.115799	0.0171528	0.104145	0.141588	0.118563	0.033273	0.0265892	0.0568018	0.0346327	0.34722	0.203302	0.0574079	0.020265	0.0146307	1	0	0	1	0	1	0	0	0	0	0	1	0	0	0	0	0	0	0	0	0
chr1	153862545	153863255	3.38248	0.456144	0.129678	0.0786292	0.0801511	0.11802	0.118752	0.122941	0.0199298	0.165325	0.533788	0.403901	0.178806	0.0402532	0.202696	0.218367	0.171035	0.0492486	0.0527827	0.0654734	0.0289159	0.604149	0.409263	0.0574407	0.0781578	0.0188529	1	1	0	0	0	1	0	0	0	0	0	1	0	0	0	0	0	0	0	0	0
chr1	153866287	153866685	0.753839	0.0449987	0.120583	0.067273	0.05968	0.0457887	0.0780321	0.127863	0.0180631	0.149012	0.348369	0.217134	0.157361	0.0196711	0.162311	0.129991	0.0979356	0.0391298	0.0185258	0.0783764	0.0386284	0.393873	0.441894	0.0542347	0.0848608	0.016004	1	0	0	0	0	0	0	0	0	0	0	1	0	0	0	0	0	0	0	0	0
chr1	153897153	153897551	1.02889	0.494985	0.112952	0.0789723	0.0852876	0.037755	0.144999	0.165562	0.0506209	0.0708106	0.547078	0.441287	0.118656	0.0345559	0.246518	0.280433	0.173012	0.0598011	0.0381317	0.179375	0.0494974	0.304832	0.065296	0.152928	0.194836	0.119773	1	1	0	0	0	0	0	0	0	0	0	1	0	0	0	0	0	0	0	0	0.11809
chr1	154439216	154440355	0.255754	0.3302	0.143437	0.107981	0.265765	0.0506164	0.238167	0.14196	0.0384941	0.231913	0.204536	0.892067	0.179065	0.049072	0.210072	0.161132	0.921079	0.8688	0.153146	0.072155	0.0371062	0.646868	0.319488	0.114456	0.141493	0.0378799	0	1	0	0	1	0	0	0	0	0	0	0	0.688323	0.136084	0.175593	0	0	0.824407	0	0	0
chr1	154459872	154460270	0.554098	0.0224993	0.0893714	0.0462898	0.0776746	0.0335581	0.202179	0.0959402	0.0450601	0.220738	0.188181	0.68287	0.14966	0.0455577	0.35869	0.210018	0.157732	0.0336522	0.0869957	0.517991	0.0450749	0.607243	0.363526	0.0965377	0.224777	0.0372964	1	0	0	0	0	0	0	0	0	0	0	0	1	0	0	0	0	0	0	0	0
chr1	154535017	154535415	1.21394	0.0806226	0.13997	0.0713423	0.0477957	0.0276022	0.0725605	0.0814282	0.010119	0.0927014	0.134378	0.0935363	0.110829	0.0349739	0.177206	0.122306	0.0834611	0.0110352	0.024063	0.157587	0.0155788	0.212954	0.052225	0.0335019	0.397463	0.0446946	1	0	0	0	0	0	0	0	0	0	0	0	1	0	0	0	0	0	0	0	0
chr1	154613629	154614027	1.62542	0.31499	0.0340299	0.0543013	0.0565069	0.0234891	0.190019	3.06874	0.0833092	0.127262	0.0696346	0.14541	2.59767	0.0635435	0.0440169	0.0529279	0.247393	2.4317	0.0893203	0.387782	0.0784935	0.0710293	1.9488	0.0272821	0.0819374	0.0245682	1	0	0	0	0	0	0	0	0	0.570352	0.429648	0	0	0	0	0	0	0	0	1	0
chr1	154749431	154749829	0.612898	0.157495	0.0273614	0.00025434	0.0248227	0.00850264	0.0140744	2.87004	0.02253	0.0168932	0.0102929	0.0180449	1.60814	0.0348121	0.0187018	0.010395	0.0817133	2.21029	0.0165023	0.0480593	0.0409646	0.0219859	1.9006	0.0303165	0.00326335	0.0158791	1	0	0	0	0	0	0	0	0	0	1	0	0	0	0	0	0	0	0	1	0
chr1	154760876	154761274	0.551004	0.0224993	0.0913653	0.0743943	0.0727866	0.0343539	0.29389	0.0778646	0.0229989	0.447669	0.0162252	0.282393	0.0919302	0.0214778	0.214472	0.0337468	0.139079	0.0390765	0.0236802	0.15052	0.0471487	0.215697	0.0528305	0.0425365	0.182598	0.0530783	1	0	0	0	0	0	0	0	0	0	0	0	0	0.311558	0.688442	0	0	0	0	0	0
chr1	154799884	154800669	0.194174	0.0114073	0.284315	0.0491306	0.0376535	0.0268337	0.237993	0.0494479	0.0136942	0.0774413	0.0203863	0.0899407	0.0697161	0.00760137	0.0828598	0.0257613	0.0637083	0.0274544	0.0120268	0.199145	0.0331714	0.0458431	0.0315577	0.0174243	0.159656	0.0518164	0	0	1	0	0	0	0	0	1	0	0	0	0	0	0	0	0	0	0	0	0
chr1	154868029	154869039	0.650009	0.0797945	1.07406	0.0380353	0.0493807	0.0379057	0.685564	0.122285	0.0505234	0.00893136	0.0617461	0.225466	0.109006	0.0608492	0.0605267	0.106686	0.243651	0.047834	0.0558539	0.069844	0.0601888	0.0844596	0.0441954	0.0414611	0.121191	0.100013	1	0	1	0	0	0	0	0	1	0	0	0	0	0	0	0	0	0.830693	0	0	0
chr1	154938076	154938712	0.0547113	0.0140798	0.224011	0.0693153	0.0555395	0.0283236	0.799831	0.14309	0.0391348	0.097214	0.0273627	0.525983	0.0779543	0.0222237	0.13958	0.0448996	0.0859144	0.0143952	0.0169149	0.102354	0.0347274	0.220764	0.023645	0.0400398	0.204897	0.0441688	0	0	1	0	0	0	0	0	1	0	0	0	0	0	0	0	0	1	0	0	0
chr1	155120475	155121438	0.209499	0.0371952	0.560356	0.121672	0.0734167	0.0335204	0.745042	0.293211	0.0732647	0.01024	0.0277727	0.770416	0.193912	0.0932238	0.0443563	0.0216646	0.739681	0.0927302	0.0601505	0.0610391	0.010786	0.144274	0.0454212	0.0651617	0.129797	0.0260155	0	0	1	0	0	0	0	0	0.169263	0.830737	0	0	0	0	0	0	0	0.584631	0.415369	0	0
chr1	155132142	155132736	0.0172801	0	0.189918	0.345348	0.0696385	0.0262009	0.803225	0.0831988	0.208341	0	0.0228615	0.74743	0.127442	0.17372	0.0360804	0.0611958	0.432634	0.0443461	0.101593	0.0344543	0.0282513	0.082506	0.0384096	0.0623655	0.0936121	0.0446971	0	0	0	1	0	0	0	1	0	0	0	0	0	0	0	0	0	0.6633	0.3367	0	0
chr1	155152500	155153192	0.071198	0.0258806	0.257245	0.196676	0.0565649	0.0253474	0.829759	0.553081	0.147235	0.0475681	0.0481841	0.672613	0.290187	0.266334	0.0466931	0.126794	0.342133	0.181016	0.116214	0.0590399	0.0287699	0.194724	0.172898	0.127985	0.0613901	0.0411932	0	0	1	0	0	0	0	0	0.277457	0.722543	0	0	0	0	0	0	0	0.566474	0.433526	0	0
chr1	155156348	155157224	0.0614576	0.0204446	0.405893	0.0912314	0.04421	0.0232203	0.666479	0.136991	0.0754167	0.00767522	0.0237304	0.555506	0.0750738	0.0724544	0.0383477	0.0261055	0.226227	0.0258014	0.0447745	0.0481044	0.018118	0.0782768	0.0196327	0.0726374	0.0613761	0.0259695	0	0	1	0	0	0	0	0	0.484018	0.515982	0	0	0	0	0	0	0.059361	0.940639	0	0	0
chr1	155159991	155160751	0.0338995	0.023565	0.286034	0.257397	0.0372833	0.0240051	0.37354	0.193888	0.0807762	0.0157029	0.0598688	0.320069	0.108699	0.073042	0.0159188	0.0489158	0.160391	0.0244979	0.064883	0.0528053	0.0301212	0.0578979	0.024596	0.116275	0.0647844	0.0876627	0	0	1	1	0	0	0	0.198684	0.526316	0.275	0	0	0	0	0	0	0	1	0	0	0
chr1	155165006	155165729	0.125572	0.0371566	0.247426	0.0704247	0.0551085	0.0267138	0.632518	0.136212	0.197529	0.0223186	0.0235403	0.648947	0.123862	0.156574	0.053949	0.0265137	0.171425	0.042193	0.0764745	0.0839574	0.0343723	0.157794	0.0410727	0.109399	0.0858392	0.0594311	0	0	1	0	0	0	0	1	0	0	0	0	0	0	0	0	0.178423	0.821577	0	0	0
chr1	155334552	155334950	1.74856	0.444985	0.0886841	0.00877472	0.0505311	0.021688	0.097031	2.68793	0.0446694	0.0233689	0.0209788	0.0653582	1.68507	0.0341784	0.0170337	0.0134013	0.162511	2.2169	0.0697418	0.0531031	0.0488727	0.0698917	1.7613	0.0237397	0.020967	0.0264697	1	0	0	0	0	0	0	0	0	0	1	0	0	0	0	0	0	0	0	1	0
chr1	155347585	155348010	0.052409	0	0.0620623	0.0307254	0.0916914	0.066108	0.119875	0.0591465	0.123799	0.213899	0.0365327	0.114409	0.0925001	0.0326889	0.182819	0.0800183	0.0869312	0.0318138	0.0384491	0.0876568	0.020392	0.0943364	0.0555094	0.066952	0.100697	0.052085	0	0	0	0	0	1	1	0	0	0	0	0	0	0	0	0	0	0	0	0	0
chr1	155389789	155390685	0.121947	0.0399764	0.256605	0.0850151	0.0638313	0.0305943	0.376863	0.0740663	0.358689	0.312194	0.0281742	0.382831	0.124719	0.0357659	0.366069	0.0314945	0.166817	0.0400434	0.0356857	0.079805	0.0270198	0.415999	0.0948532	0.0839094	0.101627	0.019064	0	0	1	0	0	0	0.330357	0.669643	0	0	0	0	0	0	0	0	0	0	0	0	0
chr1	155394484	155395305	0.331374	0.0654426	0.47984	0.0759512	0.0544115	0.0330399	0.745463	0.313276	0.0725774	0.232647	0.0400609	0.651118	0.153668	0.0395429	0.361743	0.073731	0.155769	0.0553698	0.0481385	0.236823	0.0505884	0.342535	0.115334	0.0670804	0.199713	0.0386436	0	0	1	0	0	0	0	0	0.615104	0.384896	0	0	0	0	0	0	0	0	0	0	0
chr1	155449680	155450078	0.708449	0	0.0411798	0.0321739	0.0474704	0.0355519	0.0842637	0.0779933	0.0165784	0.139298	0.0249074	0.0862787	0.0682745	0.00760422	0.231564	0.0333446	0.0598377	0.0305602	0.00810759	0.114462	0.0342684	0.423044	0.120126	0.0483033	0.0984718	0.0772996	1	0	0	0	0	0	0	0	0	0	0	0	1	0	0	0	0	0	0	0	0
chr1	155596923	155597911	0.163264	0.135952	0.446921	0.0638819	0.187234	0.0265373	0.719369	0.283491	0.0333446	0.089431	0.0161423	0.641789	0.217117	0.0552304	0.105907	0.0243658	0.878051	0.714145	0.0788743	0.0567969	0.0351277	0.470929	0.651417	0.0732363	0.0359431	0.00960051	0	1	1	0	1	0	0	0	0.517206	0.482794	0	0	0	0	0	0	0	0.719636	0.280364	0	0
chr1	155746907	155747305	1.23882	0.379364	0.0640038	0.0169136	0.0509795	0.026555	0.185459	2.76152	0.0378583	0.0163301	0.0395218	0.229924	1.84187	0.0451263	0.0428591	0.0327941	0.372666	2.41466	0.0634252	0.0690411	0.0622403	0.22374	2.045	0.0520653	0.197446	0.0345342	1	0	0	0	0	0	0	0	0	0.497487	0.502513	0	0	0	0	0	0	0	1	0	0
chr1	155756564	155757526	0.233403	0.0279253	0.311441	0.0867061	0.0503695	0.0274105	0.378951	0.122826	0.169591	0.0371293	0.0144331	0.568704	0.13964	0.288334	0.0212878	0.0143734	0.276333	0.0440672	0.826583	0.0599321	0.0302934	0.182668	0.0652256	0.307044	0.0605643	0.0229186	0	0	1	0	0	0	0	0.546778	0.453222	0	0	0	0	0	0	0	1	0	0	0	0
chr1	155854497	155855034	0.28251	0.0166755	0.19902	0.253256	0.0668174	0.0362894	0.371628	0.0834539	0.0265917	0.0529511	0.0395118	0.91392	0.145986	0.0307375	0.0577272	0.0211046	0.472868	0.0599878	0.0314635	0.0983891	0.041	0.328844	0.0804837	0.0638054	0.145381	0.0604901	0	0	0	1	0	0	0	0	1	0	0	0	0	0	0	0	0	1	0	0	0
chr1	155880706	155881893	0.237888	0.626151	1.1153	0.680661	0.297761	0.0654842	0.856107	0.380418	0.0346625	0.0169928	0.0290126	1.02873	0.22981	0.0612012	0.0290768	0.0177892	1.15054	0.475848	0.119929	0.0602498	0.0370634	0.623498	0.462725	0.074949	0.0434945	0.0231818	0	1	1	1	1	1	0	0	0.247683	0.752317	0	0	0	0	0	0	0	0.326032	0.673968	0	0
chr1	156874702	156875100	0.803359	0.0674979	0.0923276	0.0607874	0.0769236	0.0314807	0.72454	0.116206	0.0159013	0.191808	0.0632701	1.17896	0.155725	0.044196	0.133974	0.0157301	0.784372	0.0888283	0.0476611	0.0972396	0.0461367	0.594557	0.230257	0.0785376	0.058346	0.031425	1	0	0	0	0	0	0	0	1	0	0	0	0	0	0	0	0	1	0	0	0
chr1	156877315	156878617	0.285424	0.398905	0.269264	0.221852	0.164788	0.0320857	0.845128	0.192778	0.056271	0.210044	0.0541731	1.40395	0.179618	0.0719806	0.0787515	0.0340215	1.40118	0.211271	0.097617	0.0917684	0.0539954	0.529338	0.0992663	0.150161	0.104128	0.0519595	1	1	1	1	1	0	0	0	0.69278	0.30722	0	0	0	0	0	0	0	0.69278	0.30722	0	0
chr1	156885913	156887121	0.315197	0.555964	0.775995	0.179242	0.219345	0.0393517	1.04839	0.208713	0.0295503	0.049837	0.0284758	1.03249	0.151383	0.0521149	0.0393171	0.0197679	1.33187	0.227522	0.103592	0.0687903	0.0275901	0.63031	0.28452	0.0927681	0.0356959	0.0161752	1	1	1	1	1	0	0	0	0.668874	0.331126	0	0	0	0	0	0	0	1	0	0	0
chr1	156922115	156922144	0.152197	0.368825	0.116994	0.101227	0.130329	0.0316159	0.625783	0.214785	0.0430742	2.04313	0.114573	0.51299	0.280101	0.0377476	1.04148	0.0932687	0.282797	0.0508489	0.0799343	0.302398	0.0531516	0.862608	0.335842	0.0868696	0.327876	0.0718167	0	1	0	0	0	0	0	0	0	0	0	0	0	0	1	0	0	0	0	0	0
chr1	156944152	156945549	0.202607	0.128199	0.750822	0.269842	0.183167	0.0351351	0.189281	1.04796	0.022818	0.0192512	0.0110749	0.208783	0.578451	0.0476033	0.0253769	0.0177208	0.22923	2.12224	0.124135	0.0397595	0.0301679	0.128381	1.57686	0.120747	0.0205312	0.0219036	0	0	1	1	1	0	0	0	0.177523	0.143164	0.679313	0	0	0	0	0	0	0.177523	0.143164	0.679313	0
chr1	156946516	156946914	0.911931	0.538733	0.081053	0.0244166	0.0522017	0.0383415	0.359276	1.99045	0.0271923	0.0404028	0.0208413	0.223816	1.19895	0.0397737	0.0279448	0.0299995	0.314289	1.98429	0.0251978	0.0594588	0.0575306	0.13312	1.51861	0.0447471	0.0348771	0.0305089	1	1	0	0	0	0	0	0	0	1	0	0	0	0	0	0	0	0	0.497487	0.502513	0
chr1	156956572	156956970	0.509868	0.0224993	0.0542416	0.074776	0.0454972	0.0236147	0.144239	0.0630731	0.00562601	0.554799	0.0443932	0.349972	0.118933	0.0221789	0.480909	0.0412625	0.0870117	0.0291208	0.0196332	0.550098	0.0498848	0.419338	0.0775556	0.0443901	0.134572	0.0208899	1	0	0	0	0	0	0	0	0	0	0	0	0	1	0	0	0	0	0	0	0
chr1	157006019	157006417	0.612385	0.224993	0.103465	0.0338272	0.0263587	0.0209592	0.1916	3.70641	0.0252779	0.0506796	0.0221377	0.244716	2.49732	0.0535664	0.0510227	0.0289622	0.520648	2.44527	0.0529249	0.554733	0.0634023	0.095049	2.21751	0.0416578	0.0485968	0.034201	1	0	0	0	0	0	0	0	0	0.545226	0.454774	0	0	0	0	0	0	0	0.545226	0.454774	0
chr1	157070117	157070515	1.00555	0.0899972	0.101471	0.0713423	0.0716652	0.0446995	0.676389	0.200855	0.0425076	0.463155	0.054529	1.44685	0.218413	0.0735609	0.129676	0.0287928	0.285777	0.0563893	0.0494658	0.143809	0.0440254	0.858134	0.413255	0.0947666	0.0829846	0.0210148	1	0	0	0	0	0	0	0	0	0	0	0	0	0	1	0	0	1	0	0	0
chr1	157099680	157099984	0.522843	0.0589126	0.0995452	0.291528	0.101164	0.0337462	0.519598	0.188874	0.0242792	0.740911	0.0477819	1.58531	0.302653	0.0353385	0.371431	0.0632236	0.593643	0.0490132	0.0333293	0.114118	0.0490516	0.479695	0.166865	0.0385942	0.315358	0.0302749	0	0	0	1	0	0	0	0	0	0	0	0	0	0.394737	0.605263	0	0	0.394737	0	0	0
chr1	157194447	157194947	0.147089	0.0179094	0.231861	0.0725798	0.0689419	0.022138	0.422309	0.142399	0.0331622	0.0107015	0.0115705	0.497159	0.0868783	0.092758	0.0173547	0.00970688	0.549469	0.0391463	0.0826349	0.0291157	0.0218082	0.37853	0.0499024	0.0744178	0.0517253	0.00530338	0	0	1	0	0	0	0	0	1	0	0	0	0	0	0	0	0	1	0	0	0
chr1	157198528	157199075	0.276688	0.180077	0.186678	0.288414	0.0768535	0.0227471	0.593312	0.171308	0.0402433	0.0122916	0.0237253	0.752454	0.108307	0.0843859	0.0255016	0.0203798	1.09425	0.136469	0.0784792	0.0506223	0.0170437	0.468889	0.10149	0.0723494	0.0458562	0.030692	0	0	0	1	0	0	0	0	1	0	0	0	0	0	0	0	0	1	0	0	0
chr1	157229032	157229637	0.0380038	0	0.427517	0.0890131	0.0361037	0.0193154	0.196096	0.111047	0.0380302	0	0.00595712	0.241304	0.0659231	0.144573	0.0308027	0.0166712	0.39383	0.0151328	0.11455	0.0174445	0.0114978	0.109897	0.00778613	0.15031	0.0161547	0.00876594	0	0	1	0	0	0	0	0	1	0	0	0	0	0	0	0	0.391736	0.608264	0	0	0
chr1	157235386	157236151	0.173623	0	0.176901	0.668696	0.0852086	0.0453823	0.468329	0.0776356	0.249214	0.0288569	0.023883	0.779188	0.166317	0.155553	0.0387355	0.0290564	0.551523	0.0630771	0.147355	0.0701672	0.0242892	0.562836	0.0962471	0.110558	0.0586236	0.0176274	0	0	1	1	0	0	0	0.458824	0.541176	0	0	0	0	0	0	0	0	0.738562	0.261438	0	0
chr1	157254936	157255661	0.0750364	0	0.279954	0.138018	0.0465307	0.0207722	0.316079	0.160774	0.0751172	0.029908	0.00652392	0.261182	0.15991	0.0740814	0.0228603	0.0106227	0.541778	0.270699	0.0910573	0.0304574	0.0138674	0.268497	0.179147	0.112338	0.0181163	0.0135632	0	0	1	0	0	0	0	0.088276	0.911724	0	0	0	0	0	0	0	0	0.724138	0.275862	0	0
chr1	157405180	157405578	0.73527	0.144996	0.0549978	0.0350988	0.0357093	0.0224503	0.126669	3.07079	0.051806	0	0.0469469	0.106425	2.36298	0.0652424	0.0118334	0.0343608	0.279114	2.46495	0.0570674	0.0476902	0.0321071	0.107935	2.14933	0.0278725	0.0282009	0.0426403	1	0	0	0	0	0	0	0	0	0.050251	0.949749	0	0	0	0	0	0	0	0.050251	0.949749	0
chr1	157407569	157408273	0.102061	0	0.24326	0.0355158	0.0311281	0.0201558	0.354086	0.172257	0.0973251	0.022523	0.0152693	0.296012	0.14691	0.278152	0.0373989	0.0321844	0.43771	0.109825	0.1634	0.0277494	0.0219795	0.217241	0.0351407	0.140964	0.0279427	0.00529679	0	0	1	0	0	0	0	0	0.671875	0.328125	0	0	0	0	0	0	0.896307	0.103693	0	0	0
chr1	157408952	157409713	0.254992	0	0.203071	0.117921	0.0703114	0.025967	0.822839	0.277582	0.274049	0.0239651	0.0313642	0.661075	0.159953	0.288957	0.0342488	0.0479547	0.786024	0.0972283	0.185433	0.0559314	0.0241163	0.267476	0.0655747	0.150274	0.0596573	0.0158834	0	0	1	0	0	0	0	0	0	1	0	0	0	0	0	0	1	0	0	0	0
chr1	157657236	157657634	0.483046	0.0449987	0.101677	0.100845	0.0416851	0.0582537	0.110771	0.0696638	0.0354359	0.431199	0.0464361	0.108329	0.0902693	0.0346773	0.336985	0.0650166	0.459555	0.0930797	0.220491	0.0836114	0.0379413	0.583005	0.706836	0.211584	0.0473595	0.0318414	1	0	0	0	0	0	0	0	0	0	0	0	0	1	0	0	0	0	0	0	0
chr1	157659695	157660093	0.608515	0.0899972	0.0380173	0.0920711	0.0517421	0.0311708	0.492116	1.28484	0.0509205	1.39798	0.115658	0.372637	0.204823	0.0447623	0.312063	0.170449	0.430783	2.48747	0.096594	0.100807	0.037504	0.136398	2.07268	0.0452276	0.0480121	0.0417936	1	0	0	0	0	0	0	0	0	0	0	0	0	0	1	0	0	0	0	0	0
chr1	157865331	157865843	0.101943	0	0.0420042	0.0788858	0.12117	0.0685952	0.154161	0.07815	0.737182	0.0255523	0.0335163	0.181535	0.0736328	0.69195	0.0425454	0.0188271	0.0969345	0.0274647	0.782175	0.0589702	0.0319116	0.103365	0.0494487	0.586938	0.0480186	0.0119874	0	0	0	0	0	1	1	0	0	0	0	0	0	0	0	1	0	0	0	0	0
chr1	157883188	157883586	0.768542	0.339988	0.0385673	0.0831692	0.0593882	0.0350241	0.193879	2.56483	0.0406843	0.00218203	0.0206448	0.103213	1.74277	0.0638939	0.00651521	0.0238599	0.106675	2.52894	0.0936404	0.0749866	0.0765822	0.104242	1.93367	0.0426051	0.0243936	0.0227359	1	0	0	0	0	0	0	0	0	0.467337	0.532663	0	0	0	0	0	0	0	0	1	0
chr1	157887846	157888244	0.887045	0.112496	0.0428983	0.0278502	0.0477172	0.0259938	0.177252	1.56167	0.0442266	0.0314637	0.0129644	0.213822	0.791133	0.109519	0.0258646	0.0141423	0.4434	2.13731	0.120055	0.067223	0.0275596	0.145391	1.57544	0.0688028	0.0329463	0.00981336	1	0	0	0	0	0	0	0	0	0.386935	0.613065	0	0	0	0	0	0	0	0.386935	0.613065	0
chr1	157934659	157935263	0.302154	0.222386	0.0734318	0.0168432	0.0600781	0.10542	0.407963	0.105629	0.0412082	0.541134	0.0498845	0.780566	0.116261	0.0665871	0.142256	0.0221813	0.104935	0.0481434	0.0479016	0.118539	0.0399671	0.782043	0.158654	0.099911	0.0728257	0.027137	0	0	0	0	0	1	0	0	0	0	0	0	0	0	1	0	0	1	0	0	0
chr1	157938754	157939634	0.0891135	0.0203516	1.0989	0.38196	0.0584556	0.0360343	0.431503	0.104736	0.01264	0.0458418	0.0617527	0.703102	0.116618	0.0337514	0.0490369	0.0394878	0.301323	0.0277697	0.0394262	0.069084	0.0186741	0.398356	0.0548994	0.0538518	0.061165	0.0309803	0	0	1	1	0	0	0	0	1	0	0	0	0	0	0	0	0	1	0	0	0
chr1	157960903	157961581	0.37182	0.0396226	0.194476	0.100481	0.0714488	0.0925269	0.405227	0.0879633	0.0316344	0.136354	0.0144943	0.764282	0.11285	0.0532809	0.0524956	0.0190271	0.424964	0.0326791	0.0420795	0.0591677	0.029804	0.393351	0.216071	0.0777223	0.0659143	0.0184553	1	0	0	0	0	1	0	0	1	0	0	0	0	0	0	0	0	1	0	0	0
chr1	158142780	158143900	0.1492	0.226977	0.149657	0.206974	0.150478	0.0330725	0.40397	0.0998996	0.0222785	0.198928	0.0188887	1.21208	0.178123	0.0556156	0.0559001	0.0283177	1.17817	0.887407	0.111663	0.0607644	0.0399021	0.322362	0.0591149	0.0531146	0.159428	0.0567429	0	0	0	1	1	0	0	0	0.982143	0	0	0	0.017857	0	0	0	0	1	0	0	0
chr1	158152472	158153540	0.150314	0.11948	0.322881	0.914881	0.225762	0.0421406	0.675158	0.139301	0.02	0.241612	0.0237978	0.98929	0.219291	0.0471994	0.0281262	0.026517	1.50574	0.244205	0.198203	0.0695813	0.0315234	0.797387	0.182097	0.103266	0.0566051	0.0332289	0	0	1	1	1	0	0	0	1	0	0	0	0	0	0	0	0	0.692884	0.307116	0	0
chr1	158156861	158157664	0.217815	0.0542091	0.299	0.0754476	0.0547586	0.0268426	0.388899	0.102276	0.00918517	0.150888	0.0328683	0.913036	0.102991	0.0493104	0.042359	0.0415849	0.595638	0.0479904	0.102182	0.0903213	0.0289169	0.326071	0.0418743	0.0735992	0.0969327	0.0411128	0	0	1	0	0	0	0	0	1	0	0	0	0	0	0	0	0	1	0	0	0
chr1	158218798	158219196	1.78789	0.0118746	0.0721846	0.0770647	0.0859489	0.0347057	0.628755	0.0831242	0.0331048	0.102626	0.0604612	0.432839	0.109219	0.0103007	0.215061	0.0674513	0.153171	0.0556027	0.0293541	0.112016	0.049335	0.234592	0.0779312	0.0408889	0.123056	0.06886	1	0	0	0	0	0	0	0	1	0	0	0	0	0	0	0	0	0	0	0	0
chr1	158316994	158317612	0.919809	0	0.375224	0.113348	0.114105	0.0624136	0.397077	0.0662389	0.0144845	0.148368	0.0120179	0.191302	0.0696092	0.020214	0.127633	0.0303504	0.542671	0.037268	0.0583684	0.0400706	0.0269932	0.399439	0.0930128	0.0729593	0.0345983	0.0196928	1	0	1	0	0	0	0	0	1	0	0	0	0	0	0	0	0	0.980583	0	0	0
chr1	158337895	158338729	2.00704	0	0.264494	0.0684558	0.0626698	0.037642	0.585311	0.126095	0.0509496	0.245312	0.0207728	0.661796	0.102321	0.0292239	0.119844	0.0398068	0.184692	0.0393694	0.0337778	0.110369	0.0402846	0.611707	0.325011	0.0820945	0.0948222	0.0444863	1	0	1	0	0	0	0	0	1	0	0	0	0	0	0	0	0	1	0	0	0
chr1	158449517	158450412	0.0937561	0.0100053	0.0582079	0.0376067	0.0801065	0.0630377	0.115199	0.0679914	0.0328135	0.289973	0.0306253	0.128743	0.0789972	0.0213624	0.211352	0.0234801	0.100316	0.0406334	0.0277061	0.0774385	0.03095	0.0839105	0.055412	0.0352242	0.118961	0.0351522	0	0	0	0	0	1	0	0	0	0	0	0	0	1	0	0	0	0	0	0	0
chr1	158488789	158489187	0.598199	0.0899972	0.0369174	0.0665098	0.0242061	0.0138388	0.0815583	2.54093	0.0195738	0.0375873	0.0210573	0.0996835	1.57351	0.00839968	0.024903	0.00694414	0.272505	2.32464	0.0245142	0.0283353	0.028684	0.082939	1.997	0.0380467	0.0214158	0.0192381	1	0	0	0	0	0	0	0	0	0.027638	0.972362	0	0	0	0	0	0	0	0.027638	0.972362	0
chr1	158640857	158641401	0.16208	0.085048	0.0849009	0.0614064	0.076605	0.0755553	0.266055	0.0952439	0.706373	0.0781728	0.0233963	0.404169	0.0887995	0.50816	0.0441776	0.0121745	0.238791	0.0584458	0.391409	0.0691118	0.0205653	0.657291	0.322765	0.182072	0.0506753	0.017223	0	0	0	0	0	1	1	0	0	0	0	0	0	0	0	0.001838	0.998162	0	0	0	0
chr1	158648323	158648721	0.481112	0.0224993	0.0746595	0.029249	0.0521344	0.0300901	0.197589	2.65588	0.0455028	0.0291407	0.0146144	0.14543	1.91368	0.0626806	0.0237648	0.0274802	0.313484	2.47797	0.0510655	0.048401	0.0598039	0.19525	2.03587	0.0585184	0.0490999	0.0318136	1	0	0	0	0	0	0	0	0	0.193467	0.806533	0	0	0	0	0	0	0	0.193467	0.806533	0
chr1	158674855	158676137	0.567827	0.314323	0.894111	0.592123	0.275783	0.0724153	0.708591	0.189427	0.0332704	0.0459771	0.0158554	0.866062	0.174099	0.0509903	0.0408066	0.0258961	1.18607	0.953213	0.099743	0.0618492	0.0242677	0.551631	0.300215	0.0838159	0.0474772	0.031918	1	1	1	1	1	1	0	0	0.687988	0.312012	0	0	0	0	0	0	0	1	0	0	0
chr1	158727112	158727549	0.113096	0	0.0124598	0.0442434	0.0911751	0.0672303	0.0831943	0.0603965	0.0078282	0.0972496	0.0293754	0.22219	0.10903	0.0204942	0.197745	0.0398554	0.0571714	0.013085	0.0234844	0.0912625	0.0314604	0.10163	0.0364425	0.0502449	0.113126	0.0403519	0	0	0	0	0	1	0	0	0	0	0	0	1	0	0	0	0	0	0	0	0
chr1	158839235	158839981	0.0787716	0.0720218	0.081644	0.135354	0.121115	0.0239908	0.170855	0.0691559	0.0612816	0.0450636	0.0201212	0.310609	0.0661106	0.0566314	0.0717175	0.0183206	0.54567	0.0394345	0.0683982	0.0311096	0.0182892	0.206438	0.0448993	0.204507	0.0302215	0.00804214	0	0	0	0	1	0	0	0	0.536193	0	0	0	0.463807	0	0	0	0	0.536193	0	0	0
chr1	158868951	158869349	0.760028	0.269365	0.0910213	0.0310294	0.0583905	0.0249634	0.321066	2.23851	0.0400462	0.361936	0.292367	0.183741	1.33137	0.0675884	0.13525	0.232671	0.639366	2.35516	0.0361765	1.0261	0.0656259	0.0926805	2.26432	0.0443763	0.0250327	0.0214173	1	0	0	0	0	0	0	0	0	0.123116	0	0	0	0	0.876884	0	0	0	0.625628	0.374372	0
chr1	158894339	158894737	0.594458	0.0674979	0.086278	0.0593884	0.0707683	0.056595	0.233609	0.0636741	0.0114604	0.355672	0.0164805	0.373748	0.0711686	0.0144803	0.296088	0.0282212	0.160873	0.0425151	0.0165707	0.266103	0.0564437	0.57106	0.182042	0.0693657	0.0229115	0.00932755	1	0	0	0	0	0	0	0	0	0	0	0	0	0.344221	0.655779	0	0	0	0	0	0
chr1	158901268	158901911	0.0971367	0.0835587	0.255827	0.18435	0.119141	0.0283108	0.815114	0.140681	0.0158237	0.129834	0.0778874	0.78481	0.133837	0.0507649	0.109006	0.103577	1.18474	0.0801598	0.0602969	0.156174	0.0660774	0.508715	0.0888263	0.149314	0.0490086	0.0963283	0	0	1	1	0	0	0	0	1	0	0	0	0	0	0	0	0	1	0	0	0
chr1	158902228	158903148	0.0777082	0.042178	0.592046	0.104418	0.0817419	0.0265274	0.56367	0.0968844	0.00878331	0.0908645	0.0223151	0.565739	0.0943676	0.0297059	0.0739866	0.0451896	0.727051	0.034392	0.0357543	0.0914241	0.0314169	0.246066	0.0365385	0.083229	0.0413703	0.0343051	0	0	1	0	0	0	0	0	0.83913	0	0	0	0	0	0.16087	0	0	1	0	0	0
chr1	158903864	158904507	0.0997706	0	0.500123	0.065333	0.060348	0.0202635	0.419458	0.0560892	0.0124865	0.0824316	0.0127664	0.297901	0.049924	0.0281406	0.0621917	0.0568468	0.267108	0.0152037	0.0251342	0.108634	0.0227346	0.133784	0.0279991	0.0574342	0.0340442	0.0195629	0	0	1	0	0	0	0	0	1	0	0	0	0	0	0	0	0	1	0	0	0
chr1	158915492	158916362	0.244812	0.0308784	0.667619	0.107161	0.168155	0.0403305	0.915131	0.252007	0.0351326	0.0167443	0.0331588	1.08033	0.146244	0.0478938	0.0395368	0.016707	1.36899	0.240325	0.134844	0.0535074	0.0293647	0.717297	0.239346	0.0835405	0.025883	0.0192718	0	0	1	0	0	0	0	0	0.583908	0.416092	0	0	0	0	0	0	0	1	0	0	0
chr1	158916601	158917264	0.323879	0.0780367	0.430477	0.13413	0.0798834	0.0276228	0.632552	0.169042	0.0116407	0.015634	0.0162844	0.582067	0.147852	0.0172071	0.0266708	0.012188	0.8966	0.265515	0.0708545	0.0258633	0.0205564	0.294175	0.275516	0.0241912	0.0305358	0.0154565	0	0	1	0	0	0	0	0	0.39819	0.60181	0	0	0	0	0	0	0	1	0	0	0
chr1	158920983	158921711	0.278746	0.147605	0.445562	0.139326	0.120371	0.0351174	0.810881	0.13868	0.0489272	0.0392511	0.0377687	1.03899	0.155192	0.0522676	0.0294714	0.0286696	0.944954	0.0517542	0.0741407	0.0832763	0.045836	0.68997	0.114617	0.0870291	0.0234756	0.0250418	0	0	1	0	0	0	0	0	1	0	0	0	0	0	0	0	0	1	0	0	0
chr1	158925402	158926199	0.229243	0.0112355	0.274265	0.0689033	0.0663011	0.0346457	0.657447	0.0816369	0.036367	0.127946	0.026318	0.575999	0.123635	0.0411848	0.0945777	0.0359775	0.769997	0.0507277	0.0365817	0.102981	0.0326844	0.513581	0.060677	0.129349	0.0450728	0.0421432	0	0	1	0	0	0	0	0	1	0	0	0	0	0	0	0	0	1	0	0	0
chr1	158969271	158969669	1.21961	0.427486	0.236353	0.0310294	0.0822716	0.0407456	1.00676	0.37101	0.0197821	0.0218203	0.0219412	0.826317	0.237967	0.0203587	0.0480006	0.0102892	0.93234	0.428789	0.0438329	0.0668264	0.0204261	0.378055	0.501739	0.0296575	0.00579245	0.0171283	1	0	0	0	0	0	0	0	0	1	0	0	0	0	0	0	0	1	0	0	0
chr1	158979980	158980914	0.0499483	0.0479374	0.30575	0.115316	0.0753136	0.0320696	0.669872	0.0552816	0.0196618	0.111488	0.0289448	0.886558	0.10758	0.0267098	0.0694072	0.0158147	0.557029	0.0403508	0.0595248	0.0849225	0.0353486	0.415349	0.0825743	0.124845	0.0603056	0.021991	0	0	1	0	0	0	0	0	1	0	0	0	0	0	0	0	0	1	0	0	0
chr1	158985176	158986636	0.0598287	0.0184001	0.537633	0.15243	0.146998	0.0216393	0.409873	0.141063	0.0166005	0.024081	0.0107309	0.415435	0.146322	0.0176529	0.0240571	0.0122871	0.752089	0.158256	0.0438564	0.0415241	0.0125736	0.234517	0.0361513	0.0860723	0.031881	0.0318672	0	0	1	1	1	0	0	0	0.726027	0.273973	0	0	0	0	0	0	0	0.726027	0.273973	0	0
chr1	159393736	159394122	0.152371	0	0.0591176	0.0388125	0.112805	0.072157	0.106128	0.0377188	0.037961	0.0603836	0.0802854	0.122186	0.069878	0.0367006	0.0628879	0.0583497	0.0624018	0.0290641	0.0835823	0.0450152	0.0428822	0.0606679	0.0392215	0.0950513	0.0600199	0.10024	0	0	0	0	0	1	0	0	0	0	0	0	1	0	0	0	0	0	0	0	0
chr1	159443435	159444322	0.0507434	0	0.335555	0.05923	0.0340882	0.0266686	0.268103	0.101423	0.00517737	0.0227401	0.0505741	0.324762	0.063743	0.0180462	0.0225066	0.0132899	0.177786	0.0182693	0.0195576	0.0369894	0.0235382	0.0278302	0.017715	0.0205525	0.0507251	0.051625	0	0	1	0	0	0	0	0	1	0	0	0	0	0	0	0	0	1	0	0	0
chr1	159624778	159626042	0.0876211	0.0141689	0.473435	0.0921774	0.213712	0.0371492	0.242677	0.0724979	0.0148156	0.0323142	0.11746	0.25564	0.0974652	0.0243426	0.0807299	0.0406107	0.960014	0.150696	0.119067	0.049224	0.0639542	0.0574175	0.053521	0.0230735	0.0587454	0.112135	0	0	1	0	1	0	0	0	0.175633	0	0	0	0.824367	0	0	0	0	0.949367	0	0	0
chr1	161161978	161162376	0.773444	0.157495	0.02908	0.0507406	0.0499144	0.0337762	0.0603708	2.05395	0.0255253	0.0425145	0.0115108	0.0985723	1.24266	0.0314145	0.0272579	0.015836	0.112547	2.3737	0.0589409	0.0838715	0.0429385	0.0449085	1.72529	0.0244537	0.0176085	0.0185441	1	0	0	0	0	0	0	0	0	0	1	0	0	0	0	0	0	0	0	1	0
chr1	161165634	161166426	0.0677815	0	0.0781803	0.173185	0.142483	0.0213135	0.446482	0.0713209	0.129626	0.0394397	0.0143328	0.468368	0.103423	0.236846	0.0226028	0.0118625	0.72141	0.502155	0.257627	0.0327165	0.0233858	0.336571	0.050102	0.161325	0.0254392	0.00781918	0	0	0	1	1	0	0	0	1	0	0	0	0	0	0	0.209596	0.790404	0	0	0	0
chr1	161167978	161169009	0.0497789	0	0.436059	0.570349	0.233271	0.0256052	0.409447	0.251596	0.112286	0	0.0090236	0.312111	0.167075	0.124742	0.00909068	0.0157162	0.719937	0.451737	0.173912	0.0443286	0.0195465	0.387945	0.117067	0.135382	0.0192901	0.0098217	0	0	1	1	1	0	0	0	0.418041	0.581959	0	0	0	0	0	0	0.021339	0.590689	0.387973	0	0
chr1	161538549	161539004	0.0452311	0	0.0346978	0.0299232	0.110772	0.0730485	0.0146245	0.0415007	0.0152648	0.0248744	0.0662204	0.0375354	0.0484948	0.00336117	0.0294049	0.0116299	0.0320235	0.0266735	0.0139447	0.0413811	0.0331227	0.0357242	0.0639614	0.00931993	0.0445903	0.0359023	0	0	0	0	0	1	0	0	0	0	0	0	1	0	0	0	0	0	0	0	0
chr1	161665269	161665667	1.54443	0	0.0400796	0.0249253	0.0624493	0.05502	0.1008	0.0428931	0.0105488	0.0594782	0.0709703	0.111066	0.094472	0.0150466	0.216866	0.0183131	0.0952454	0.0213508	0.0254439	0.0653227	0.0354052	0.503815	0.174058	0.0258542	0.082957	0.028871	1	0	0	0	0	0	0	0	0	0	0	0	1	0	0	0	0	0	0	0	0
chr1	161711163	161712146	0.0353459	0.00910959	0.462304	0.104317	0.0619678	0.03622	0.162019	0.119872	0.0181755	0.133546	0.0549164	0.253609	0.126794	0.0360613	0.218922	0.0781923	0.0751361	0.0496227	0.0333798	0.107237	0.144832	0.0910599	0.070483	0.0443844	0.166051	0.147112	0	0	1	0	0	0	0	0	0	0	0	0	1	0	0	0	0	0.610376	0	0	0
chr1	161954494	161954892	0.69878	0.133121	0.0766533	0.0432377	0.0491745	0.0557738	0.0782753	0.0687835	0.0251347	0.182728	0.0319788	0.573788	0.175958	0.0640962	0.0532206	0.0216158	0.496588	0.0855899	0.0403329	0.0779254	0.0358425	0.401754	0.256823	0.0560472	0.032348	0.0420851	1	0	0	0	0	0	0	0	0	0	0	0	1	0	0	0	0	1	0	0	0
chr1	161991146	161992492	0.061007	0.312684	0.175938	0.29507	0.19085	0.0429488	0.541024	0.127098	0.011152	0.130852	0.0395833	0.582419	0.130006	0.0268264	0.0429862	0.0495927	0.996394	0.297424	0.227254	0.0719146	0.0986907	0.446387	0.207851	0.104551	0.0377133	0.0444781	0	1	1	1	1	0	0	0	1	0	0	0	0	0	0	0	0	1	0	0	0
chr1	162125207	162125605	0.581823	0.0981218	0.0289426	0.0713423	0.0634136	0.0368335	0.0434086	2.24747	0.0324406	0.0162597	0.0111573	0.0460046	1.5753	0.0812462	0.0417994	0.0279036	0.188087	2.06735	0.060964	0.0816573	0.0496473	0.0936845	1.54756	0.0340786	0.0405336	0.0223612	1	0	0	0	0	0	0	0	0	0	1	0	0	0	0	0	0	0	0	1	0
chr1	162142686	162143084	0.955134	0.269992	0.0224116	0.00521396	0.0373686	0.0270995	0.0594893	2.96373	0.0306825	0.0335751	0.00754292	0.035475	2.08888	0.0326818	0.0302408	0.0381504	0.153868	2.3133	0.0529249	0.0583653	0.0197639	0.0188011	1.85526	0.0318269	0.021035	0.0071067	1	0	0	0	0	0	0	0	0	0	1	0	0	0	0	0	0	0	0	1	0
chr1	162198461	162198859	0.734367	0.0224993	0.196342	0.109366	0.0770021	0.0296294	0.420315	0.0667656	0.0574061	0.0321674	0.0312717	0.540831	0.0798507	0.0965492	0.0492762	0.0353134	0.172043	0.0440477	0.0811303	0.0899677	0.0422015	0.450436	0.141301	0.282007	0.0321441	0.0217365	1	0	0	0	0	0	0	0	1	0	0	0	0	0	0	0	0	1	0	0	0
chr1	162237251	162238108	0.180735	0.0336688	0.508788	0.0409279	0.0472415	0.0235873	0.552209	0.42526	0.113625	0.0249417	0.0174421	0.757629	0.143028	0.115173	0.0345863	0.0170194	0.75491	0.284078	0.116367	0.0705061	0.0196742	0.236519	1.17881	0.0588233	0.0308917	0.0125636	0	0	1	0	0	0	0	0	0.592765	0.407235	0	0	0	0	0	0	0	0.592765	0.407235	0	0
chr1	162260343	162260741	0.635593	0.134996	0.1674	0.193298	0.11982	0.0665218	0.528959	0.0622787	0.148529	0.0326602	0.0222555	0.855147	0.190655	0.0543348	0.0147574	0.0171487	0.940014	0.253704	0.0980567	0.0510801	0.0224625	0.505515	0.311955	0.0585462	0.0166295	0.0208482	1	0	0	0	0	0	0	0	1	0	0	0	0	0	0	0	0	1	0	0	0
chr1	162260932	162261316	0.0930212	0	0.0535827	0.264008	0.0639705	0.0380464	0.371776	0.0836404	0.0632243	0.0530379	0.028564	0.707787	0.0935604	0.0600469	0.0352688	0.023896	0.829953	0.0939316	0.0675374	0.050364	0.019617	0.458898	0.146817	0.0611217	0.0295108	0.00595592	0	0	0	1	0	0	0	0	1	0	0	0	0	0	0	0	0	1	0	0	0
chr1	162269470	162270119	0.451697	0.0137977	0.206581	0.0311168	0.0422161	0.0227783	0.553714	0.068104	0.101971	0.020072	0.0152383	0.44297	0.0675806	0.144115	0.0257058	0.0139959	0.175664	0.0305595	0.0873913	0.053161	0.0267152	0.335989	0.0399537	0.141475	0.0212383	0.0178584	1	0	1	0	0	0	0	0	1	0	0	0	0	0	0	0	0.183359	0.816641	0	0	0
chr1	162339217	162341123	0.0979317	0	0.0772465	0.110999	0.229408	0.0346367	0.127789	0.100752	0.213238	0.0246927	0.0555951	0.751668	0.191764	0.130945	0.0386095	0.0409149	0.883747	0.238644	0.126229	0.0647651	0.0488927	0.110502	0.0428799	0.0512893	0.0716416	0.0164803	0	0	0	1	1	0	0.629591	0	0	0	0	0	0.370409	0	0	0	0	0.685205	0.314795	0	0
chr1	162611373	162611994	0.0330577	0.0144198	0.282868	0.0532217	0.0681771	0.0212766	0.243489	0.0909051	0.163726	0.0259394	0.00767944	0.364793	0.065144	0.265659	0.0224376	0.0157532	0.469686	0.0379848	0.298389	0.0344281	0.0209698	0.207348	0.0388902	0.192055	0.0344921	0.0203716	0	0	1	0	0	0	0	0	1	0	0	0	0	0	0	0	1	0	0	0	0
chr1	162723998	162724993	0.140246	0.00899972	0.470644	0.119285	0.280243	0.0249031	0.680529	0.226934	0.0345061	0.0154291	0.0144494	0.575985	0.152605	0.0618473	0.0247813	0.0104078	0.985361	0.337865	0.115525	0.0363971	0.0188945	0.337761	0.054209	0.0840733	0.0363538	0.012148	0	0	1	1	1	0	0	0	0.396985	0.603015	0	0	0	0	0	0	0	1	0	0	0
chr1	162737016	162737396	0.0529428	0	0.0442103	0.0420892	0.105838	0.0659526	0.439239	0.0684442	0.0608208	0.0600102	0.0503227	0.424204	0.0395893	0.0889073	0.044396	0.0422636	0.30944	0.0361396	0.08337	0.0657258	0.0341121	0.135585	0.0464132	0.0508501	0.082714	0.0339166	0	0	0	0	0	1	0	0	1	0	0	0	0	0	0	0	0	1	0	0	0
chr1	162741839	162742607	0.108391	0	0.346078	0.0744703	0.0583463	0.0273582	0.682177	0.18348	0.0350069	0.0175091	0.021255	0.792152	0.0957644	0.0936756	0.0503202	0.0459377	0.750404	0.0609797	0.0776902	0.0335972	0.0248352	0.182647	0.0540094	0.093319	0.0699861	0.0488417	0	0	1	0	0	0	0	0	1	0	0	0	0	0	0	0	0	1	0	0	0
chr1	162755543	162756105	0.0730564	0.0159337	0.162416	0.279906	0.146731	0.0373566	0.682401	0.116594	0.0705818	0.028214	0.0339148	0.663784	0.105542	0.0621966	0.0211242	0.0294164	1.09442	0.1521	0.095633	0.0483613	0.0286567	0.487619	0.0840757	0.0738118	0.0469819	0.0249382	0	0	0	1	0	0	0	0	1	0	0	0	0	0	0	0	0	1	0	0	0
chr1	162836408	162836806	0.776538	0.0718728	0.0749345	0.0169136	0.0501946	0.0194597	0.0820447	2.97937	0.0420127	0.0196383	0.0444128	0.0743608	2.03915	0.0541732	0.01462	0.0272684	0.127444	2.34315	0.0982482	0.0564792	0.0508589	0.047732	1.96885	0.0296163	0.0118705	0.0268306	1	0	0	0	0	0	0	0	0	0	1	0	0	0	0	0	0	0	0	1	0
chr1	162965132	162965530	1.68924	0.548108	0.0219991	0.0438736	0.068896	0.0259268	0.0607659	2.37464	0.183913	0.0176674	0.0167752	0.0645056	1.02447	0.0759203	0.0223911	0.0176568	0.185534	2.33299	0.160292	0.0460227	0.0283967	0.0602301	1.82118	0.04531	0.0381813	0.00520511	1	1	0	0	0	0	0	0	0	0	1	0	0	0	0	0	0	0	0	1	0
chr1	162966280	162966678	0.670025	0.0449987	0.0638662	0.0929609	0.040833	0.0338932	0.184456	2.73475	0.704746	0.0229465	0.0240431	0.258736	1.28043	0.821107	0.0584406	0.0272473	0.455321	2.45449	1.34034	0.0723623	0.0500096	0.335931	1.61043	0.34669	0.0383036	0.0151018	1	0	0	0	0	0	0	0	0	0.502513	0.497487	0	0	0	0	0	0	0	0.698492	0.301508	0
chr1	162970102	162970500	1.02412	0.157495	0.157569	0.0429834	0.0831908	0.0406453	0.726698	0.147206	0.377853	0.0275218	0.0537237	1.23094	0.221056	0.765975	0.0525534	0.00914596	0.446719	0.105448	1.08719	0.0940685	0.0298958	0.431528	0.151053	0.404838	0.0604674	0.031536	1	0	0	0	0	0	0	1	0	0	0	0	0	0	0	0	1	0	0	0	0
chr1	163029755	163030517	0.299109	0	0.509524	0.0956475	0.0522236	0.025701	0.3694	0.125372	0.126309	0	0.0115833	0.355592	0.0827564	0.177764	0.0166663	0.014707	0.374352	0.0864922	0.13551	0.0357894	0.0135203	0.274498	0.057611	0.212656	0.0212279	0.0111067	1	0	1	0	0	0	0	0.41601	0.58399	0	0	0	0	0	0	0	1	0	0	0	0
chr1	163061349	163061747	0.603999	0.247492	0.0202805	0.0338272	0.0631329	0.040997	0.1581	2.74589	0.0421299	0.0501869	0.0294253	0.0799531	1.94239	0.070514	0.0235293	0.0400347	0.399594	2.28218	0.0716833	0.0650904	0.0445126	0.105835	1.97291	0.0509532	0.0316138	0.02343	1	0	0	0	0	0	0	0	0	0	1	0	0	0	0	0	0	0	0	1	0
chr1	163182161	163183462	0.134242	0.309734	0.612403	0.471745	0.190986	0.0281356	0.939413	0.323697	0.0432784	0.0169034	0.0208097	0.733013	0.370166	0.0522048	0.0231311	0.0128367	1.317	0.253073	0.079247	0.0746232	0.0356731	0.585716	0.155648	0.0685919	0.041214	0.0241951	0	1	1	1	1	0	0	0	0.508839	0.491161	0	0	0	0	0	0	0	0.508839	0.491161	0	0
chr1	163198769	163199651	0.153675	0.182749	0.6827	0.75312	0.187364	0.0386665	0.698063	0.143703	0.0357536	0.0179776	0.0231081	0.545812	0.282559	0.036218	0.0280625	0.0149415	0.85472	0.0973253	0.0622074	0.0701732	0.018457	0.510938	0.210866	0.0732899	0.0276415	0.0215087	0	0	1	1	1	0	0	0	1	0	0	0	0	0	0	0	0	0.28458	0.71542	0	0
chr1	163200420	163200850	0.126395	0	0.0103719	0.0290734	0.0872216	0.0607415	0.552197	0.0849857	0.0423818	0.0468428	0.0149268	0.490911	0.082783	0.0608985	0.0319863	0.0222802	0.275228	0.0469993	0.0711827	0.0631059	0.0300762	0.362926	0.154793	0.0703291	0.00661995	0.0223544	0	0	0	0	0	1	0	0	1	0	0	0	0	0	0	0	0	1	0	0	0
chr1	163236884	163237897	0.142212	0	0.708319	0.285694	0.0730302	0.0305428	0.444263	0.134094	0.0120703	0	0.0233611	0.489781	0.10366	0.0186038	0.0286279	0.0130842	0.551224	0.0419167	0.0318487	0.0522534	0.0162763	0.31829	0.0706373	0.0469433	0.0425512	0.0203851	0	0	1	1	0	0	0	0	1	0	0	0	0	0	0	0	0	1	0	0	0
chr1	163526997	163527821	0.124381	0.0217347	0.0871978	0.0589056	0.0864509	0.0553677	0.05343	0.0687586	0.0163045	0.150816	0.0402091	0.0615761	0.0821575	0.0191069	0.191185	0.0362609	0.0599214	0.0266957	0.0290369	0.082586	0.0882326	0.0501109	0.0353596	0.0379608	0.0941998	0.127851	0	0	0	0	0	1	0	0	0	0	0	0	1	0	0	0	0	0	0	0	0
chr1	163664976	163665614	0.550706	0.0701781	0.124584	0.0494236	0.0482245	0.0748905	0.674784	0.213326	0.021139	0.265172	0.0354748	0.340316	0.131777	0.0205812	0.229807	0.0403344	0.253689	0.176059	0.0228066	0.451661	0.0518732	0.310878	0.896508	0.0283169	0.0764006	0.00942953	1	0	0	0	0	1	0	0	0.648903	0	0	0	0	0	0.351097	0	0	0	0	0	0
chr1	163681211	163682095	0.168539	0.091168	0.513861	0.139703	0.105025	0.0269891	0.667263	0.185152	0.0309879	0.0100459	0.0127263	0.661522	0.176469	0.0334955	0.0414817	0.0429407	1.15703	0.423037	0.0532826	0.057614	0.0351599	0.321214	0.056789	0.0500598	0.160729	0.0608928	0	0	1	0	0	0	0	0	0.786199	0.213801	0	0	0	0	0	0	0	1	0	0	0
chr1	163721699	163723551	0.126421	0.0241758	0.285713	0.109153	0.154126	0.0263411	0.795926	0.176786	0.035163	0.0236127	0.0216386	0.782883	0.124961	0.0594991	0.0312247	0.0208924	1.25927	0.247121	0.116035	0.0471579	0.0380354	0.296896	0.057626	0.0866023	0.0764364	0.0245404	0	0	1	0	1	0	0	0	0.784017	0.215983	0	0	0	0	0	0	0	1	0	0	0
chr1	163724901	163725299	0.50961	0.0631231	0.120102	0.0497234	0.0822042	0.0478745	0.393048	0.080913	0.047808	0.09066	0.0446289	0.49334	0.124268	0.0584876	0.0594415	0.0354405	0.82703	0.0457936	0.115448	0.0863179	0.0479483	0.50874	0.213248	0.0589856	0.152385	0.0348812	1	0	0	0	0	0	0	0	1	0	0	0	0	0	0	0	0	1	0	0	0
chr1	163824112	163825657	0.501893	0.168082	0.968646	0.357768	0.276949	0.0751789	0.676152	0.137676	0.03381	0.0174071	0.0178674	0.715443	0.144846	0.0411573	0.0197257	0.0110112	1.14739	0.295357	0.141504	0.0462361	0.0245908	0.49972	0.345562	0.0704466	0.0301971	0.0134337	1	1	1	1	1	1	0	0	0.87055	0.12945	0	0	0	0	0	0	0	0.7411	0.2589	0	0
chr1	164029374	164029772	1.01819	0	0.106146	0.0829146	0.0528631	0.0376043	0.160411	0.0653701	0.0227384	0.144859	0.0198591	0.266985	0.111433	0.0270056	0.136211	0.0327306	0.304663	0.0439144	0.0483447	0.0703119	0.0400027	0.468381	0.0709656	0.0265544	0.137741	0.0354503	1	0	0	0	0	0	0	0	0	0	0	0	1	0	0	0	0	0.502513	0	0	0
chr1	164184480	164184878	0.788271	0.0224993	0.0660661	0.0495962	0.0531772	0.0420693	0.0504002	0.0835535	0.00856925	0.229114	0.0191126	0.232541	0.129276	0.0190644	0.215414	0.0107973	0.112833	0.026402	0.0254439	0.0565613	0.0395904	0.382431	0.148424	0.0451178	0.0502421	0.0288155	1	0	0	0	0	0	0	0	0	0	0	0	1	0	0	0	0	0	0	0	0
chr1	164374760	164375570	0.181591	0.0110552	0.473487	0.0573619	0.0613587	0.0365141	0.894779	0.130126	0.00840193	0.14194	0.0235792	0.31555	0.103312	0.0203646	0.184499	0.0414128	0.128973	0.0307654	0.0477779	0.0899307	0.0435346	0.0818275	0.0620782	0.0334964	0.12014	0.0706234	0	0	1	0	0	0	0	0	1	0	0	0	0	0	0	0	0	0.703704	0	0	0
chr1	164439438	164440754	0.295609	0.142894	0.967817	0.097958	0.0650316	0.0317089	0.537288	0.220905	0.0197561	0.0265031	0.0116734	0.596104	0.0844049	0.0246	0.0510525	0.0211934	0.371581	0.0409316	0.0220183	0.0934168	0.0255639	0.392458	0.281108	0.0270202	0.0699493	0.0172951	1	0	1	0	0	0	0	0	0.420973	0.579027	0	0	0	0	0	0	0	1	0	0	0
chr1	164478314	164478712	0.461254	0.0899972	0.0132682	0.0507406	0.0253048	0.0243603	0.247198	2.9544	0.0295105	0.0494125	0.0204484	0.138172	1.971	0.0422545	0.0189961	0.0179955	0.486783	2.31905	0.0349324	0.0409652	0.029571	0.148549	2.0931	0.0455709	0.0357065	0.0323411	1	0	0	0	0	0	0	0	0	0.718593	0.281407	0	0	0	0	0	0	0	0	1	0
chr1	164500534	164500932	0.785689	0.120621	0.0323111	0.0845677	0.0546346	0.0233802	0.0706758	2.59119	0.0326621	0.0233689	0.0284038	0.0599051	1.66055	0.0513957	0.0134033	0.0367531	0.292987	2.471	0.0238853	0.0992078	0.0395529	0.0861905	2.0273	0.0306323	0.0608343	0.0250262	1	0	0	0	0	0	0	0	0	0	1	0	0	0	0	0	0	0	0	1	0
chr1	164664242	164665140	0.251467	0	0.495584	0.104947	0.0487868	0.0281982	0.602188	0.106689	0.109517	0.00907819	0.0219476	0.538785	0.145488	0.239448	0.0274408	0.0142062	0.289539	0.0428427	0.362103	0.0503427	0.0214116	0.405429	0.0507597	0.175667	0.0306383	0.0164254	0	0	1	0	0	0	0	0	1	0	0	0	0	0	0	0	0.844098	0.155902	0	0	0
chr1	164796883	164797331	0.0111121	0	0.0434852	0.0601036	0.0812671	0.0641506	0.0500682	0.0131215	0.00562285	0.0333297	0.028846	0.0533602	0.0364419	0.00234766	0.0743557	0.0177362	0.124139	0.0304055	0.0141504	0.0396597	0.017769	0.0540074	0.0395836	0.00900205	0.0363238	0.0345889	0	0	0	0	0	1	0	0	0	0	0	0	1	0	0	0	0	0	0	0	0
chr1	165234553	165234999	0.0790544	0	0.0349687	0.0960068	0.0902755	0.0625246	0.0636933	0.0416103	0.00790263	0.0719205	0.0217359	0.0180139	0.037032	0	0.128154	0.0113734	0.021398	0.0128328	0.00779628	0.0592074	0.0495327	0.0222468	0.0315559	0.0195184	0.120902	0.0664658	0	0	0	0	0	1	0	0	0	0	0	0	1	0	0	0	0	0	0	0	0
chr1	165313775	165314173	0.668993	0	0.134057	0.0513768	0.0445441	0.0472463	0.389492	0.118825	0.0770971	0.0274514	0.0103126	0.457785	0.0654056	0.210827	0.03707	0.0164077	0.140417	0.0409424	0.24629	0.0291144	0.0174278	0.378604	0.180915	0.0555254	0.0143451	0.013686	1	0	0	0	0	0	0	0.062814	0.937186	0	0	0	0	0	0	0	1	0	0	0	0
chr1	165374091	165374489	0.779371	0	0.0923276	0.0493418	0.0850971	0.0354598	0.0863612	0.0619996	0.0115776	0.165835	0.0145751	0.328377	0.0985489	0.0133073	0.0960016	0.0290045	0.0685768	0.0336389	0.0125921	0.0519549	0.0706732	0.461423	0.161556	0.0593971	0.0406288	0.0296206	1	0	0	0	0	0	0	0	0	0	0	0	1	0	0	0	0	1	0	0	0
chr1	165576720	165577118	0.607227	0	0.0651724	0.0909262	0.0911849	0.0452189	0.103931	0.107061	0.03149	0.073626	0.0200359	0.0933374	0.21708	0.02559	0.128459	0.0304441	0.132224	0.0596276	0.0373523	0.0802081	0.12999	0.0958255	0.0960542	0.0197579	0.12345	0.118288	1	0	0	0	0	0	0	0	0	0	0	0	1	0	0	0	0	0	0	0	0
chr1	165764859	165765951	1.05567	0	0.909792	0.0882493	0.048051	0.0506121	0.72982	0.219115	0.0368331	0.0260135	0.0162444	0.658468	0.132619	0.0742751	0.053135	0.0358728	0.312705	0.0314717	0.0427747	0.0735667	0.0280485	0.472504	0.172094	0.057144	0.0640538	0.0213234	1	0	1	0	0	0	0	0	0.678571	0.321429	0	0	0	0	0	0	0	1	0	0	0
chr1	165861705	165862559	0.108173	0.115342	0.29364	0.070942	0.0590232	0.0314743	0.715142	0.814387	0.300669	0	0.0254769	0.804227	0.247443	0.293281	0.0333451	0.0128365	0.831225	0.301493	0.276817	0.0607274	0.0275394	0.626672	0.546236	0.235678	0.0322232	0.0220198	0	0	1	0	0	0	0	0.186183	0	0.813817	0	0	0	0	0	0	0.420375	0	0.579625	0	0
chr1	165924743	165925141	0.528694	0.108122	0.0609101	0	0.040934	0.0266556	0.0891579	2.81727	0.0403457	0.0216092	0.00946797	0.067361	1.7666	0.0350548	0.0337142	0.0312063	0.14775	2.46667	0.0474834	0.0497953	0.0571433	0.0733578	2.09246	0.0387469	0.0447624	0.0254148	1	0	0	0	0	0	0	0	0	0.143216	0.856784	0	0	0	0	0	0	0	0	1	0
chr1	166003951	166004349	0.783498	0	0.0525917	0.0512493	0.0400818	0.0304839	0.0684263	0.0532407	0.00768364	0.17041	0.0374593	0.356853	0.115964	0.0421871	0.215296	0.0652706	0.142438	0.0347983	0.0303248	0.105386	0.0313325	0.481923	0.0950972	0.120744	0.116964	0.0382402	1	0	0	0	0	0	0	0	0	0	0	0	1	0	0	0	0	0	0	0	0
chr1	166039796	166040395	0.22628	0	0.0812621	0.0674284	0.0336644	0.0934145	0.0563316	0.066129	0.0118028	0.0946599	0.0238845	0.126552	0.0908793	0.0237039	0.179653	0.0377698	0.0743812	0.022351	0.0210393	0.067743	0.0339672	0.350955	0.123604	0.0365102	0.0337533	0.0151804	0	0	0	0	0	1	0	0	0	0	0	0	1	0	0	0	0	0	0	0	0
chr1	166065327	166066711	1.36915	0.0323509	0.0791582	0.0747502	0.0652958	0.0773984	0.119752	0.0621312	0.0265976	0.174585	0.0470487	0.396718	0.127262	0.0269893	0.243596	0.0301915	0.132505	0.0365136	0.0251238	0.149322	0.0455404	0.457131	0.500427	0.153769	0.0310275	0.0140304	1	0	0	0	0	1	0	0	0	0	0	0	1	0	0	0	0	0	0	0	0
chr1	166089591	166090260	0.145297	0	0.0626574	0.0433506	0.0651999	0.0930841	0.0734769	0.0582262	0.0191523	0.410169	0.0461363	0.0699088	0.0784807	0.0117348	0.390216	0.0207441	0.0897269	0.03097	0.0931729	0.0737065	0.0434271	0.591751	0.159873	0.26745	0.0509301	0.0521304	0	0	0	0	0	1	0	0	0	0	0	0	0.103139	0.896861	0	0	0	0	0	0	0
chr1	166179029	166179427	0.718637	0.0318741	0.028049	0.000890186	0.0299689	0.0185048	0.0738372	2.28887	0.0227645	0	0.0143002	0.0897883	1.50282	0.0316976	0.0167786	0.0367954	0.143435	1.72013	0.0322116	0.0727997	0.0283592	0.04626	1.61657	0.0338452	0.0177717	0.0229025	1	0	0	0	0	0	0	0	0	0	1	0	0	0	0	0	0	0	0	1	0
chr1	166237168	166237566	0.696199	0.0731228	0.0514231	0.0281045	0.0456766	0.0214032	0.099858	2.65813	0.0455549	0.00858737	0.0284627	0.0673213	1.6898	0.0460431	0.0381101	0.00808738	0.230064	2.47626	0.0564933	0.0429608	0.0589671	0.0608191	2.08784	0.0491271	0.0361824	0.0266224	1	0	0	0	0	0	0	0	0	0	1	0	0	0	0	0	0	0	0	1	0
chr1	166371890	166371959	0.44851	1.21487	0.109446	0.181182	0.14234	0.0372542	0.147461	0.0551044	0.0086387	0.306129	0.0470208	0.369101	0.146029	0.019209	0.161642	0.078888	0.445653	0.0873303	0.220894	0.116924	0.0623328	0.362158	0.127106	0.0756342	0.318194	0.161648	0	1	0	0	0	0	0	0	0	0	0	0	1	0	0	0	0	1	0	0	0
chr1	166507789	166508227	0.0738196	0.0204446	0.0525364	0.0922139	0.0867289	0.0682641	0.0359363	0.0564351	0.00455602	0	0.0770191	0.0491008	0.0896404	0.00393268	0.0657108	0.0115619	0.0407361	0.0202366	0.0202877	0.0491726	0.0379728	0.0356273	0.0223572	0.0201743	0.059529	0.03833	0	0	0	0	0	1	0	0	0	0	0	0	1	0	0	0	0	0	0	0	0
chr1	167034071	167036496	0.119829	0.125551	0.0977791	0.0777257	0.202498	0.0450679	0.182106	0.109997	0.020269	0.161387	0.0392637	0.619731	0.139335	0.0307958	0.0685608	0.0411125	1.14626	0.279903	0.0904973	0.0661567	0.0378033	0.615088	0.221516	0.0790021	0.0451863	0.0280273	0	1	0	0	1	1	0	0	0.164948	0	0	0	0.835052	0	0	0	0	1	0	0	0
chr1	167122679	167123304	0.166448	0	0.246734	0.0421915	0.05354	0.0273711	0.493985	0.348073	0.0845236	0.0277904	0.0196762	0.39952	0.106473	0.071459	0.0397768	0.0159489	0.481775	0.138915	0.0527174	0.158365	0.0299209	0.379227	0.256735	0.0750626	0.0446879	0.0220621	0	0	1	0	0	0	0	0	0.8336	0.1664	0	0	0	0	0	0	0	1	0	0	0
chr1	167124509	167124907	0.487431	0.066248	0.0821529	0	0.0496453	0.0272922	0.182176	1.77517	0.0238193	0.0041529	0.0109804	0.232284	1.01931	0.0213834	0.0233919	0.020409	0.334896	2.12615	0.0245825	0.0512988	0.0301207	0.221679	1.95853	0.0383076	0.0479169	0.0188772	1	0	0	0	0	0	0	0	0	0.268844	0.731156	0	0	0	0	0	0	0	0.268844	0.731156	0
chr1	167145934	167146332	0.457643	0.0449987	0.106421	0.04718	0.0544552	0.0362387	0.213152	0.0454478	0.465069	0.0101359	0.0184448	0.38743	0.103482	0.650454	0.0664473	0.00256171	0.118063	0.0226702	0.594736	0.0358941	0.0305329	0.43573	0.0958604	0.414093	0.0352035	0.0101465	1	0	0	0	0	0	1	0	0	0	0	0	0	0	0	0	1	0	0	0	0
chr1	167166825	167167223	0.712063	0.136871	0.0886152	0.0251796	0.0366623	0.0210011	0.0742931	2.51897	0.0355662	0.0230169	0.0228252	0.0752135	1.40882	0.0503306	0.0134426	0.0128085	0.10251	2.18852	0.0365457	0.0573268	0.0271973	0.0647933	1.61673	0.0228061	0.0288127	0.0187661	1	0	0	0	0	0	0	0	0	0.057789	0.942211	0	0	0	0	0	0	0	0.057789	0.942211	0
chr1	167193904	167194331	0.103485	0	0.0693968	0.0664971	0.0856607	0.0679614	0.0374004	0.0537469	0.0105121	0.0726279	0.00893479	0.0501623	0.0539031	0.011084	0.0819631	0.0284948	0.0249212	0.0230064	0.0177136	0.0696009	0.0120638	0.0284503	0.0317857	0.0179681	0.0490731	0.0169095	0	0	0	0	0	1	0	0	0	0	0	0	1	0	0	0	0	0	0	0	0
chr1	167252922	167253669	0.761034	0.239751	0.203324	0.146353	0.090637	0.0760134	0.749571	0.180688	0.101333	0.0679173	0.0378233	0.905373	0.180743	0.0764108	0.0474061	0.0366034	0.997128	0.188913	0.125024	0.0659886	0.0373815	0.706262	0.267305	0.0487869	0.120833	0.0346252	1	0	1	0	0	1	0	0	1	0	0	0	0	0	0	0	0	1	0	0	0
chr1	167282831	167283229	0.422826	0	0.111371	0.0076302	0.0582784	0.0261865	0.200628	0.0652199	0.433124	0.0414587	0.152843	0.159212	0.0686268	0.537982	0.0473923	0.079921	0.231989	0.0335456	0.559383	0.0889287	0.0975705	0.116286	0.0299466	0.477678	0.0734253	0.0855861	1	0	0	0	0	0	0.424623	0.575377	0	0	0	0	0	0	0	1	0	0	0	0	0
chr1	167286206	167287171	0.576829	0	0.853619	0.0660861	0.0821382	0.0224538	0.315613	0.0715063	0.0700889	0.00188699	0.00428568	0.432278	0.0911503	0.157112	0.0178871	0.04778	0.452029	0.0499162	0.184374	0.0339827	0.0195488	0.207295	0.022059	0.142863	0.0292738	0.010545	1	0	1	0	0	0	0	0.177202	0.822798	0	0	0	0	0	0	0.201036	0.798964	0	0	0	0
chr1	167322940	167323753	1.17302	0.0220288	0.328909	0.0611969	0.0383052	0.0446631	0.446751	0.0613128	0.170115	0.00609909	0.0131549	0.460425	0.0482071	0.292382	0.0347865	0.0146654	0.379968	0.0219939	0.457924	0.034829	0.0230508	0.411846	0.12151	0.181685	0.0239833	0.0237146	1	0	1	0	0	0	0	1	0	0	0	0	0	0	0	0	1	0	0	0	0
chr1	167325895	167326774	0.102294	0.0509369	0.393985	0.131169	0.17713	0.0219728	0.2517	0.0750613	0.0509476	0	0.00587011	0.27091	0.0613035	0.107828	0.0136482	0.0224984	0.547654	0.162161	0.106236	0.0297012	0.0258228	0.255156	0.0261205	0.0998438	0.0148869	0.0115138	0	0	1	0	1	0	0	0	0.802048	0.197952	0	0	0	0	0	0	0.317406	0.682594	0	0	0
chr1	167390366	167390764	0.44694	0.402487	0.0477107	0.0337	0.0351823	0.0153383	0.0510994	2.71435	0.00937669	0.0105582	0.00522505	0.0438233	1.77365	0.0117029	0.00981205	0.00948469	0.106443	2.46188	0.0301608	0.0400631	0.0314325	0.044226	1.94292	0.0221607	0.00539813	0.0118399	1	0	0	0	0	0	0	0	0	0	1	0	0	0	0	0	0	0	0	1	0
chr1	167391219	167391617	0.719668	0.33624	0.0775469	0.0278502	0.0451384	0.0226597	0.0646873	1.92639	0.0360741	0.0564515	0.015734	0.0818362	1.0862	0.0316841	0.00784969	0.0218486	0.130872	1.76998	0.0272623	0.0551398	0.0197765	0.0588251	1.481	0.0362892	0.017894	0.00278994	1	0	0	0	0	0	0	0	0	0	1	0	0	0	0	0	0	0	0	1	0
chr1	167479126	167479568	0.0250805	0	0.0175806	0.0368723	0.0963527	0.0607369	0.0586858	0.0471482	0.0290236	0.130882	0.0995816	0.0426034	0.0395653	0.0376961	0.130126	0.113485	0.0445481	0.0305662	0.0476194	0.0554233	0.0704435	0.0106637	0.0271727	0.0463631	0.0581333	0.118986	0	0	0	0	0	1	0	0	0	0	0	0	1	0	0	0	0	0	0	0	0
chr1	167558513	167559242	0.28829	0.0245671	0.749531	0.192387	0.0611374	0.0398941	0.476919	0.120487	0.0289307	0.00922288	0.0218773	0.568225	0.0845516	0.0380042	0.0151708	0.00968599	0.394929	0.0388261	0.0582819	0.0503868	0.0181428	0.28211	0.0184526	0.0441146	0.121782	0.0274551	1	0	1	1	0	0	0	0	1	0	0	0	0	0	0	0	0	1	0	0	0
chr1	167621586	167621984	0.695429	0.0849975	0.171112	0.0338272	0.0748383	0.0350411	0.365508	0.172045	0.432329	0.181038	0.0525254	0.465003	0.256112	0.109937	0.237275	0.056654	0.154892	0.0617335	0.0709857	0.190993	0.0348181	0.866426	0.320568	0.079224	0.217312	0.0254565	1	0	0	0	0	0	0	1	0	0	0	0	0	0	0	0	0	0	0	0	0
chr1	167637970	167638368	0.664477	0.0674979	0.0806407	0	0.0525494	0.0236315	0.294923	2.38368	0.045021	0.217007	0.0490879	0.860861	0.795437	0.0690174	0.127871	0.0444594	0.386499	0.511686	0.0385555	1.31649	0.0918236	0.505046	1.69211	0.032582	0.589429	0.0816716	1	0	0	0	0	0	0	0	0	1	0	0	0	0	0	0	0	0	0.924623	0	0
chr1	167639554	167640388	0.354147	0.515379	0.46521	0.249669	0.0864951	0.0370982	0.555703	0.236863	0.0390543	0.151359	0.0435048	1.10501	0.146456	0.0426069	0.0693664	0.0472529	0.600159	0.0675068	0.0344956	0.321321	0.0392651	0.336985	0.103859	0.058991	0.575727	0.110044	1	1	1	1	0	0	0	0	0	1	0	0	0	0	0	0	0	1	0	0	0
chr1	167693671	167694928	0.970341	0.512919	0.751492	0.218842	0.147336	0.0497082	0.184451	2.64354	0.0919289	0.0317811	0.0286719	0.234806	1.48531	0.0826725	0.0307881	0.021625	0.272596	2.41077	0.262496	0.0585046	0.0551295	0.177863	1.97772	0.116901	0.0377228	0.0186606	1	1	1	1	1	0	0	0	0	0.102625	0.897375	0	0	0	0	0	0	0	0.522673	0.477327	0
chr1	167698894	167699901	0.204982	0.0266774	0.254323	0.190643	0.135303	0.0409553	0.626369	0.479099	0.221864	0.00667675	0.0271104	0.704981	0.223345	0.219066	0.0311563	0.0100913	0.763671	1.44681	0.441471	0.0507388	0.0217504	0.473202	0.525041	0.185402	0.0276444	0.0178897	0	0	1	1	1	0	0	0	0	1	0	0	0	0	0	0	0.894737	0	0.105263	0	0
chr1	167741382	167741780	1.19988	0.0918722	0.0967962	0.188084	0.0651512	0.0637909	0.601883	0.0886844	0.0203291	0.231155	0.0244163	0.923407	0.151925	0.0329515	0.0760435	0.0358851	0.303106	0.0303869	0.0201528	0.166144	0.0253359	0.521479	0.116491	0.0303577	0.150427	0.0369216	1	0	0	0	0	0	0	0	1	0	0	0	0	0	0	0	0	1	0	0	0
chr1	167747730	167749302	0.144139	0.159499	0.526759	0.569919	0.219054	0.0308123	1.01069	0.307578	0.0434473	0.103041	0.025443	1.17962	0.235649	0.0435055	0.0427287	0.0212047	1.39674	0.257657	0.0875731	0.0954487	0.0319051	0.395188	0.136259	0.0382144	0.32785	0.0548394	0	0	1	1	1	0	0	0	0.491094	0.508906	0	0	0	0	0	0	0	0.745547	0.254453	0	0
chr1	167775059	167775457	1.01342	0.066248	0.0173931	0.01348	0.0304173	0.0133194	0.591519	2.10805	0.0850803	0.0103471	0.0108822	0.600221	0.924059	0.0255226	0.0445075	0.0251513	0.474111	0.527013	0.0444618	0.785053	0.0512089	0.44594	1.37508	0.0525322	0.447773	0.0252344	1	0	0	0	0	0	0	0	0	1	0	0	0	0	0	0	0	0	1	0	0
chr1	167915126	167916627	0.168087	0.0477267	0.7583	0.287732	0.0929524	0.0303018	0.626896	0.17557	0.0453298	0.0170961	0.0222454	0.67504	0.125463	0.0765482	0.0158186	0.0184072	1.03206	0.101985	0.105858	0.0494725	0.0261597	0.437086	0.087985	0.0822793	0.101244	0.0498554	0	0	1	1	0	0	0	0	1	0	0	0	0	0	0	0	0	1	0	0	0
chr1	167924283	167924983	0.12266	0.0383774	0.275491	0.129932	0.0520045	0.0319591	0.62193	0.112736	0.0595919	0.0122063	0.0151556	0.71946	0.144387	0.0939756	0.023911	0.00906406	0.427858	0.0329099	0.0854939	0.036962	0.0230995	0.300538	0.0598347	0.0439047	0.0404024	0.00765516	0	0	1	0	0	0	0	0	1	0	0	0	0	0	0	0	0	1	0	0	0
chr1	167944374	167945145	0.142384	0.290362	0.63829	0.104772	0.0880645	0.025561	0.389411	0.102542	0.0365245	0.00872047	0.0174002	0.76943	0.119698	0.0332404	0.0313328	0.0148086	0.296306	0.0353075	0.0215473	0.0579578	0.0272215	0.477144	0.106823	0.0491111	0.0178706	0.0113855	0	1	1	0	0	0	0	0	0.706874	0	0	0	0.293126	0	0	0	0	1	0	0	0
chr1	167946356	167947186	0.360615	0.0107888	0.055547	0.0733593	0.0534824	0.0756144	0.183969	0.0827147	0.036626	0.0486035	0.0284647	0.319633	0.102512	0.0352804	0.0487444	0.0239485	0.106489	0.0321905	0.0233395	0.121774	0.0274311	0.309188	0.260065	0.0393785	0.0427657	0.0146096	1	0	0	0	0	1	0	0	1	0	0	0	0	0	0	0	0	1	0	0	0
chr1	167973754	167974426	0.586154	0.139177	0.0942585	0.0700456	0.0641249	0.103846	0.282658	0.103841	0.0479292	0.0554455	0.0419748	0.425096	0.15179	0.0247223	0.191506	0.0572399	0.173865	0.0339023	0.0271509	0.222893	0.0335921	0.567566	0.240666	0.0418876	0.089503	0.0364756	1	0	0	0	0	1	0	0	0.595238	0	0	0	0.404762	0	0	0	0	0.33631	0	0	0
chr1	167993922	167994579	0.0312463	0	0.401384	0.0307379	0.0417225	0.0207857	0.250587	0.0647388	0.0103112	0.00413609	0.0220616	0.275253	0.0635563	0.0190712	0.0369359	0.0220336	0.179423	0.0226708	0.0135997	0.0362264	0.022394	0.0630672	0.0281437	0.0185732	0.0998248	0.0489541	0	0	1	0	0	0	0	0	1	0	0	0	0	0	0	0	0	0.727549	0	0	0
chr1	168347546	168347984	0.0379642	0	0.0432286	0.0307379	0.0826335	0.0630194	0.0415989	0.0231164	0.00199992	0.0405507	0.0167246	0.0766873	0.0390119	0.00602766	0.0520159	0.0163906	0.0406369	0.0211085	0.0222009	0.0722622	0.0383247	0.0498053	0.0182732	0.0208605	0.0374991	0.0540832	0	0	0	0	0	1	0	0	0	0	0	0	1	0	0	0	0	0	0	0	0
chr1	168878093	168878491	0.588012	0.0449987	0.0556854	0.108985	0.0777531	0.0307687	0.0572093	0.11919	0.0163831	0.086859	0.387105	0.0568116	0.172511	0.0346099	0.0568511	0.253524	0.0701747	0.0553093	0.0509835	0.0973353	0.126242	0.0911014	0.0653201	0.0352731	0.17977	0.108822	1	0	0	0	0	0	0	0	0	0	0	1	0	0	0	0	0	0	0	0	0.771357
chr1	168924099	168924540	0.052835	0	0.0582593	0.0305288	0.0789749	0.064496	0.0214262	0.0347971	0.00531248	0.0400843	0.140014	0.00928805	0.0696801	0.010428	0.0472166	0.0764083	0.034938	0.0315737	0.0157817	0.0533901	0.0419989	0.0134414	0.0266111	0.020793	0.0830782	0.0552436	0	0	0	0	0	1	0	0	0	0	0	0	1	0	0	0	0	0	0	0	1
chr1	169176885	169178117	0.1885	0.0323042	0.37362	0.191608	0.0734898	0.030047	0.893932	0.342194	0.174466	0.01926	0.0197987	0.902358	0.145069	0.162637	0.111419	0.0351544	0.668649	0.0675449	0.122328	0.0613122	0.0249943	0.566767	0.117876	0.195779	0.0465971	0.0134881	0	0	1	1	0	0	0	0	0.324675	0.675325	0	0	0	0	0	0	0.255682	0.744318	0	0	0
chr1	169201149	169202534	0.198136	0.155172	0.782676	0.107111	0.153244	0.0395174	1.06902	0.537019	0.360886	0.0145635	0.0329538	1.35355	0.244737	0.25138	0.0474997	0.0262944	1.37967	0.237005	0.209811	0.0440948	0.0256258	0.906189	0.315409	0.176435	0.0434306	0.0200951	0	1	1	0	1	0	0	0	0	1	0	0	0	0	0	0	0.674368	0	0.325632	0	0
chr1	169214719	169215117	0.599744	0.108122	0.0610477	0.0606598	0.0233988	0.0258262	0.162813	3.85158	0.0450601	0.0457525	0.0217449	0.260917	2.02913	0.0417961	0.0221949	0.0249185	0.586398	2.46357	0.0584484	0.184678	0.037654	0.0828985	2.22268	0.032788	0.0615005	0.0165731	1	0	0	0	0	0	0	0	0	0	1	0	0	0	0	0	0	0	0.796482	0.203518	0
chr1	169238482	169238880	1.32006	0.284367	0.0609101	0.01348	0.0456543	0.024243	0.0994932	3.00578	0.060076	0.00795388	0.012434	0.0408489	2.11968	0.0498991	0.0122455	0.0406063	0.15268	2.48789	0.0782049	0.096009	0.0538701	0.0733844	2.06863	0.0488937	0.00329055	0.0340206	1	0	0	0	0	0	0	0	0	0	1	0	0	0	0	0	0	0	0	1	0
chr1	169280262	169280660	0.727146	0.424986	0.151175	0.164812	0.0907476	0.024955	0.225828	3.50674	0.0670168	0.00570146	0.0364378	0.24896	2.38316	0.0603614	0.0321443	0.0278401	0.659371	2.52967	0.129804	0.0580786	0.0406523	0.114145	2.28322	0.0424267	0.0433482	0.0201403	1	0	0	0	0	0	0	0	0	0.653266	0.346734	0	0	0	0	0	0	0	0.653266	0.346734	0
chr1	169297952	169299547	0.120084	0.0505283	0.369765	0.0988473	0.117585	0.028215	0.782745	0.162962	0.35033	0.0385001	0.0326785	0.800628	0.111061	0.483516	0.0322945	0.0247342	1.37862	0.217294	1.22941	0.0763739	0.0400428	0.131978	0.0538556	0.514819	0.0519695	0.00949013	0	0	1	0	1	0	0	1	0	0	0	0	0	0	0	0	1	0	0	0	0
chr1	169313988	169315471	0.160818	0.47702	0.731138	0.28433	0.249571	0.0301795	0.736758	0.156009	0.0694156	0.046357	0.0257311	0.830595	0.126648	0.0914476	0.036108	0.0187556	1.28463	0.538623	0.611746	0.0596067	0.0318651	0.196148	0.0490765	0.0635049	0.133801	0.0281396	0	1	1	1	1	0	0	0	1	0	0	0	0	0	0	0	0	1	0	0	0
chr1	169324116	169324514	0.817155	0.202494	0.0171181	0.0398041	0.0408667	0.0266807	0.0983381	2.07029	0.0184147	0.0463859	0.0119036	0.0849891	1.33595	0.0105164	0.0241181	0.0358004	0.208912	2.36554	0.0418915	0.0498226	0.0318947	0.0700526	1.97268	0.0147326	0.0156233	0.00409469	1	0	0	0	0	0	0	0	0	0	1	0	0	0	0	0	0	0	0	1	0
chr1	169374815	169376885	0.163759	0.0821931	0.0889181	0.0812995	0.104923	0.0368115	0.149437	0.120623	0.0365529	0.144728	0.0889281	0.534078	0.149547	0.0873453	0.0856996	0.0946253	0.867524	0.0913224	0.179399	0.115862	0.174775	0.0978876	0.0875949	0.0339311	0.168946	0.12994	0	0	0	0	1	0	0	0	0	0	0	0	1	0	0	0	0	1	0	0	0
chr1	169477454	169477552	0	1.18533	0.140158	0.184894	0.0809128	0.0453836	0.0662947	0.0736726	0.0279788	0.0720373	0.158991	0.613817	0.133171	0.0304443	0.0648741	0.0945789	0.353151	0.0438965	0.00616333	0.0957022	0.0180624	0.278249	0.0698625	0.0328437	0.0827773	0.0234504	0	1	0	0	0	0	0	0	0	0	0	1	0	0	0	0	0	1	0	0	0
chr1	169533815	169534258	0.099632	0.0606414	0.0276703	0	0.0687268	0.0668838	0.045144	0.0493369	0.0124607	0.0340853	0.207502	0.179631	0.0702472	0.0318815	0.0645989	0.0504236	0.0523482	0.0135783	0.0146172	0.0925197	0.0389584	0.0593897	0.043437	0.0307279	0.119828	0.029218	0	0	0	0	0	1	0	0	0	0	0	1	0	0	0	0	0	1	0	0	0
chr1	169562470	169562868	0.498133	0	0.0739722	0.0630761	0.0932925	0.0337675	0.0753267	0.168502	0.0389783	0.19582	0.481215	0.14194	0.119864	0.0743159	0.0892112	0.205424	0.110457	0.0607474	0.0287662	0.156111	0.0667253	0.0862576	0.084352	0.0316758	0.164392	0.103783	1	0	0	0	0	0	0	0	0	0	0	1	0	0	0	0	0	0	0	0	0
chr1	169568118	169568516	0.484722	0	0.0624226	0.0892732	0.0726407	0.0401845	0.120863	0.127284	0.0497745	0.120082	0.475872	0.539185	0.133756	0.0467577	0.152244	0.108841	0.153021	0.0430348	0.0358074	0.157833	0.0759577	0.137616	0.105031	0.0311266	0.211057	0.0472347	1	0	0	0	0	0	0	0	0	0	0	1	0	0	0	0	0	1	0	0	0
chr1	169651325	169652003	0.176145	0.0132075	0.0789366	0.0947324	0.104324	0.0620338	0.0457529	0.0744662	0.0184394	0.0183458	0.233627	0.054861	0.0888731	0.0283104	0.06352	0.0623508	0.0548529	0.026428	0.0169987	0.0965911	0.0618744	0.0740512	0.0680269	0.00878538	0.073218	0.0449119	0	0	0	0	0	1	0	0	0	0	0	1	0	0	0	0	0	0	0	0	0
chr1	170079619	170080017	0.552548	0.0449987	0.0784405	0.0382781	0.0670347	0.0260357	0.0849629	0.0797751	0.0105748	0.0549731	0.32578	0.0292684	0.121123	0.00604022	0.0814797	0.241351	0.0811807	0.0438078	0.0405379	0.0873978	0.0448125	0.150034	0.0538966	0.096936	0.120404	0.085669	1	0	0	0	0	0	0	0	0	0	0	1	0	0	0	0	0	0	0	0	0.957286
chr1	170156295	170156693	0.881502	0.0756226	0.11412	0.0451453	0.0681561	0.0515186	0.0889451	0.0864091	0.0274788	0.0584223	0.34395	0.0568513	0.122331	0.0313875	0.0728055	0.229136	0.473865	0.0442076	0.0602256	0.108051	0.0391032	0.745018	0.198638	0.209621	0.037651	0.0113125	1	0	0	0	0	0	0	0	0	0	0	1	0	0	0	0	0	0	0	0	1
chr1	170217690	170220110	0.475047	0.199816	0.073808	0.0322923	0.259753	0.0469026	0.0497337	0.077361	0.0207692	0.0652786	0.29962	0.0374943	0.100718	0.0254334	0.0537498	0.314332	1.45186	0.382146	0.124962	0.167665	0.0507003	0.608623	0.380523	0.184853	0.0483098	0.0331051	1	1	0	0	1	1	0	0	0	0	0	1	0	0	0	0	0	0	0	0	1
chr1	170237978	170238376	1.22554	0.715602	0.0790595	0.0120811	0.0685372	0.0528169	0.0663288	0.052017	0.0304221	0.0209053	0.28781	0.0347612	0.0864441	0.00880412	0.02402	0.246262	1.04575	0.0914937	0.0640951	0.200001	0.0222001	0.608005	0.163228	0.141189	0.0300093	0.0054272	1	1	0	0	0	0	0	0	0	0	0	1	0	0	0	0	0	0	0	0	1
chr1	170242802	170243834	0.106275	0.0347082	0.0486248	0.039971	0.184743	0.0284653	0.0179484	0.0575414	0.0184978	0.019545	0.214872	0.0175203	0.065686	0.0170082	0.0402932	0.197173	1.00259	0.196252	0.0753797	0.0718819	0.0276026	0.517212	0.0942761	0.183622	0.0269485	0.0194584	0	0	0	0	1	0	0	0	0	0	0	1	0	0	0	0	0	0	0	0	1
chr1	170954661	170955059	0.651585	0	0.0686099	0.049469	0.0509349	0.0521971	0.0366298	0.0699214	0.00919434	0.0168932	0.144847	0.0450329	0.0857143	0.00911423	0.0423489	0.123406	0.039969	0.0188586	0.0152445	0.039407	0.0522208	0.337884	0.114492	0.0481385	0.0780215	0.121758	1	0	0	0	0	0	0	0	0	0	0	0	1	0	0	0	0	0	0	0	0
chr1	171227107	171227572	0.0791355	0.038515	0.0617837	0.0300416	0.083737	0.0625293	0.0239107	0.0588544	0.00890621	0.0180136	0.173625	0.0254416	0.0687762	0.0145288	0.0149154	0.154461	0.0534247	0.0256322	0.00933835	0.0681249	0.0740593	0.0309816	0.0531921	0.0316598	0.0555373	0.083899	0	0	0	0	0	1	0	0	0	0	0	1	0	0	0	0	0	0	0	0	1
chr1	171459101	171459532	0.0392953	0.0207766	0.0389788	0.044507	0.0969172	0.0668202	0.36635	0.103839	0.382968	0.065064	0.031961	0.477137	0.124816	0.407971	0.0377835	0.0118474	0.452475	0.293292	0.60088	0.0439126	0.0274338	0.342387	0.0983314	0.140382	0.0231285	0.00826731	0	0	0	0	0	1	1	0	0	0	0	0	0	0	0	0	1	0	0	0	0
chr1	171578378	171578778	0.149219	0	0.0680615	0.0351764	0.0862889	0.0661223	0.035388	0.0501549	0.0106126	0.081032	0.0474939	0.0430517	0.0686843	0.0178959	0.045398	0.0114595	0.0393072	0.0169342	0.00950905	0.0415764	0.0441658	0.0179082	0.0271571	0.0130605	0.0461756	0.06748	0	0	0	0	0	1	0	0	0	0	0	0	1	0	0	0	0	0	0	0	0
chr1	171899408	171899806	0.663573	0.0893721	0.0653788	0.0955042	0.116961	0.03262	0.0749923	1.15478	0.00780089	0.0124587	0.0206645	0.0443389	0.882636	0.0353244	0.0125398	0.0217004	0.209513	2.05396	0.0151487	0.0241527	0.0230746	0.119029	1.79568	0.0248793	0.0182748	0.0293846	1	0	0	0	0	0	0	0	0	0	1	0	0	0	0	0	0	0	0	1	0
chr1	171967287	171967796	0.0764283	0.0175928	0.134281	0.324464	0.0543887	0.0293383	0.0277624	0.0451386	0.00272908	0.209641	0.00973785	0.0172883	0.0246364	0.0089716	0.112921	0.0204611	0.0326194	0.0321389	0.0205473	0.0540062	0.0375505	0.0338804	0.0237664	0.0472924	0.0473553	0.0592267	0	0	0	1	0	0	0	0	0	0	0	0	1	0	0	0	0	0	0	0	0
chr1	172078365	172079311	0.0446491	0.0946589	0.418288	0.0781676	0.0404104	0.0309791	0.655581	0.128553	0.430185	0.0259415	0.0677912	0.573375	0.0788253	0.463837	0.03963	0.0774739	0.385997	0.0496795	0.409713	0.0466382	0.0214657	0.306698	0.0506001	0.241081	0.0368924	0.0138343	0	0	1	0	0	0	0	1	0	0	0	0	0	0	0	0	1	0	0	0	0
chr1	172105806	172106451	0.10527	0.0416499	0.251768	0.0329577	0.0715555	0.0235606	0.474842	0.313647	0.0243892	0	0.00530892	0.456974	0.229653	0.0365642	0.0170376	0.0126195	0.867269	0.338345	0.0597299	0.0313758	0.0260252	0.305299	0.136362	0.047013	0.054067	0.0135497	0	0	1	0	0	0	0	0	0	1	0	0	0	0	0	0	0	1	0	0	0
chr1	172106687	172107495	0.235141	0.0110826	0.838959	0.0833119	0.0666635	0.0235652	0.209118	0.175919	0.00891025	0.0166423	0.0133718	0.470092	0.118084	0.055115	0.0092797	0.0458013	0.689763	0.201133	0.0530211	0.0322572	0.0240919	0.253228	0.0592123	0.0239891	0.0427982	0.0185558	0	0	1	0	0	0	0	0	0.365099	0.634901	0	0	0	0	0	0	0	1	0	0	0
chr1	172120407	172120837	0.158144	0	0.106328	0.277433	0.0566189	0.0318672	0.306429	0.0743551	0.311029	0.0791572	0.0352897	0.832678	0.107846	0.216415	0.0174735	0.0465788	0.306674	0.0359341	0.106261	0.0684954	0.0626267	0.164953	0.0594615	0.144953	0.0866505	0.0299215	0	0	0	1	0	0	0.086047	0.913953	0	0	0	0	0	0	0	0	0.913953	0.086047	0	0	0
chr1	172145222	172145620	1.00336	0.168745	0.0112058	0.0251796	0.0471902	0.0255917	0.0983684	2.77744	0.0502824	0.00710921	0.072031	0.0726555	2.12232	0.0610627	0.0423489	0.0638098	0.37847	2.01909	0.0812674	0.143863	0.162334	0.0805972	1.79999	0.0525184	0.0448168	0.0902078	1	0	0	0	0	0	0	0	0	0	1	0	0	0	0	0	0	0	0	1	0
chr1	172408337	172408735	0.697359	0.157495	0.10539	0.0485788	0.0510246	0.0371685	0.1153	0.0673237	0.0359959	0.456749	0.0186805	0.0763834	0.0830971	0.0103951	0.193671	0.0480374	0.160777	0.0331724	0.0458564	0.112139	0.0234994	0.623168	0.151926	0.0616627	0.0756554	0.0136582	1	0	0	0	0	0	0	0	0	0	0	0	0	1	0	0	0	0	0	0	0
chr1	172425840	172426428	0.269528	0	0.246485	0.0574995	0.0461933	0.0153944	0.709819	0.144003	0.0326419	0.224449	0.0226826	0.698067	0.10377	0.0285096	0.140946	0.0279438	0.125499	0.0301574	0.0353329	0.0716937	0.0328099	0.308619	0.0794808	0.148168	0.0777703	0.0307504	0	0	1	0	0	0	0	0	0.952381	0	0	0	0	0	0.047619	0	0	1	0	0	0
chr1	172440462	172441729	2.19449	0.021203	0.933334	0.115009	0.0659656	0.0670729	0.688372	0.156697	0.0247501	0.0915612	0.0270449	0.621756	0.115851	0.0263349	0.0753485	0.0308315	0.283283	0.0385667	0.0683689	0.0977341	0.0552986	0.576955	0.33462	0.0866411	0.0584824	0.0216265	1	0	1	0	0	1	0	0	0.684294	0.315706	0	0	0	0	0	0	0	1	0	0	0
chr1	172465367	172465765	0.473504	0.0674979	0.136669	0.0282317	0.0827312	0.0386515	0.517985	0.0880188	0.0520928	0.47681	0.0589487	0.605991	0.185044	0.043414	0.193553	0.0437819	0.2098	0.0996906	0.071902	0.146023	0.047561	1.00419	0.214605	0.127376	0.0751522	0.0295373	1	0	0	0	0	0	0	0	0	0	0	0	0	0.082915	0.917085	0	0	1	0	0	0
chr1	172466438	172466836	0.524054	0	0.0431046	0.077828	0.0404519	0.0313299	0.134452	0.0382131	0.035475	0.116563	0.00905542	0.174163	0.0758493	0.0146826	0.0496883	0.0121946	0.105446	0.0210576	0.0496299	0.0716926	0.0285715	0.485938	0.148448	0.0688438	0.032212	0.0259839	1	0	0	0	0	0	0	0	1	0	0	0	0	0	0	0	0	1	0	0	0
chr1	172469619	172470017	1.20684	0.0224993	0.207342	0.0691801	0.0371668	0.0281132	0.444846	0.0911315	0.0242491	0.211517	0.0353967	0.225303	0.0640466	0.0163544	0.178325	0.0664774	0.113216	0.0222838	0.0780678	0.0847191	0.0225	0.435556	0.112615	0.159189	0.0744724	0.0397254	1	0	0	0	0	0	0	0	0.545226	0	0	0	0	0	0.454774	0	0	0.502513	0	0	0
chr1	172485084	172485482	0.859839	0.0674979	0.0794031	0.0507406	0.071082	0.0603478	0.354534	0.0499132	0.0718486	0.248611	0.0284824	0.344558	0.140122	0.0483891	0.174713	0.0484184	0.429117	0.0447674	0.0872966	0.115515	0.0791558	0.668704	0.295104	0.109362	0.0801834	0.0325354	1	0	0	0	0	0	0	0	0.79397	0	0	0	0.20603	0	0	0	0	0.79397	0	0	0
chr1	172496496	172497573	0.444314	0.00831451	0.603248	0.0437523	0.0633623	0.0382658	0.797881	0.159636	0.0356664	0.0313961	0.037979	0.62587	0.0838939	0.0601081	0.0600393	0.0558377	0.567871	0.028556	0.0836894	0.0849916	0.0619519	0.543413	0.100701	0.208896	0.0629909	0.0621684	1	0	1	0	0	0	0	0	1	0	0	0	0	0	0	0	0	0.839369	0	0	0
chr1	172539939	172541385	0.113363	0.136241	0.245439	0.116383	0.186983	0.0288327	0.992368	0.162453	0.043706	0.0404913	0.0306932	0.665496	0.114248	0.061198	0.0318033	0.0337686	1.13043	0.11958	0.164695	0.0673437	0.0430101	0.375779	0.0552803	0.0975852	0.0804573	0.0423764	0	1	1	0	1	0	0	0	0.723375	0.276625	0	0	0	0	0	0	0	1	0	0	0
[truncated: 17,350 more rows]
[truncated: 21 more columns]
